# Supplementary material for: Genetic Dissection of Acute Ethanol Responsive Gene Networks in Prefrontal Cortex: Functional and Mechanistic Implications
Source: PLoS One. 2012 Apr 12;7(4):e33575. doi: 10.1371/journal.pone.0033575 (PMC3325236; doi:10.1371/journal.pone.0033575)
Supplement: Table S2 — Results for functional over-representation analysis of genes differentially expressed in PFC (A), NAc (B),VMB (C) and intersection across regions (D). (XLS) [file pone.0033575.s009.xls]

## Sheet: PFC
Table S 2a: Functional Over-Representation Analysis of Genes Differentially Expressed in PFC
Analysis	ID	Name	FDR p-value	Genes in query	Genes in term	Gene Symbols
GeneOntologyCellularComponent	GO:0030425	dendrite	3.04e-14	51	262	ADORA1, ADRBK1, MAP2K4, CPLX2, SLC1A2, CDK5R1, MAP1B, MAP2, APOD, FMR1, ARHGEF2, CADM1, ATP2B2, ANKS1B, OPA1, STRN3, CANX, DLGAP3, SIPA1L1, CACNA1B, CACNA1A, DNM3, GRM3, GRM5, SREBF2, GSK3B, GRIA1, GRIA4, GRIN1, GRIK5, ARHGAP32, CHRM1, PEX5L, ABI2, PLCB4, CPEB1, TNK2, DNER, DBN1, KCNJ4, KCND2, KCNB1, TTLL7, NCS1, HOMER1, KCNIP2, DVL1, MAPK8IP3, UHMK1, RAB27A, ARC
GeneOntologyCellularComponent	GO:0030424	axon	2.01e-13	46	230	ACTB, SNCB, ADORA1, ADRBK1, MAP2K4, SYNJ2, SLC1A2, ALCAM, CDK5R1, MAP1B, SCN1A, MAPT, MBP, APC, RHOA, ATP1A3, CADM1, TUBB4, GABRB3, KLHL24, CANX, KCNAB2, CACNA1B, HTT, GRM2, GRM3, GRIA4, GRIK5, CADM2, CHRM1, VIM, SLC12A6, TNK2, KCNMA1, DCC, KCNA1, KCNA2, NCS1, SLC38A1, MYCBP2, DVL1, MAPK8IP3, EPB41L3, UHMK1, MAP3K12, TTYH1
GeneOntologyCellularComponent	GO:0014069	postsynaptic density	3.63e-13	27	87	LIN7A, ADAM10, ADORA1, MAP1B, ANKS1B, DLGAP3, DNM3, GRM3, GRM5, GRIA1, GRIA4, GRIN1, GRIN2C, ARHGAP32, LIN7C, CHRM1, YWHAZ, LIN7B, PLCB4, CPEB1, KCND2, NCS1, DLG2, DLG4, HOMER1, CABP1, ARC
MousePheno	MP:0009745	abnormal behavioral response to xenobiotic	5.52e-12	51	207	EHMT2, GRASP, MT3, MT2A, SLC1A2, CDK5R1, SCN1A, MAPT, S100A10, GABRA4, GABRA1, GABRA2, AQP4, CIT, ATP1A3, SEZ6, GNAZ, GABRB2, GABRB3, GFAP, DLGAP3, CACNB4, CACNA1B, CACNA1A, CACNA2D1, SLC4A10, MCHR1, GRM2, GRM5, GRIA1, GRIA4, GRIN1, GRIK5, GPRASP1, CNR1, PRKAA2, CREB1, SLC12A6, PENK, CACNA2D2, KCNC1, KCNA1, KCNA2, JUN, NR4A3, DLG4, PPP1R1B, HOMER1, PTGS2, SLC12A5, PLCB1
MousePheno	MP:0002064	seizures	6.44e-12	61	276	ADARB1, NPAS4, STX1B, MT3, MT2A, SLC1A2, SLC2A1, CDK5R1, SCN1A, MAPT, SCN1B, MBP, GABRA1, CIT, FMR1, ATE1, ATP1A3, ATOX1, CELF4, SEZ6, GNAQ, B4GALNT1, GABRB3, DST, GFRA2, GFAP, TEF, KCNAB2, CAMK2A, CACNB4, CACNA1A, HTT, SYN2, ATCAY, SLC4A10, GRM5, GRIA4, GRIN1, GRIK5, CNR1, CNP, CREBBP, SLC12A6, PLP1, DCX, TRIM2, KIF5A, NUMBL, CACNA2D2, DBP, S1PR2, KCNC1, KCNA1, KCNA2, JUN, NR4A3, QKI, PTGS2, PTE…
Drug	CID000005917	pentylenetetrazol	2.49e-11	33	130	ACLY, NPAS4, ADORA1, MAP1B, GABRA3, GABRA4, GABRA1, GABRA2, FOS, GOT2, IFITM3, GABRB2, GABRB3, GFAP, CACNA2D1, SYN2, GRM3, GRM5, GRIA1, GRIA4, GRINA, GRIN2C, CREB1, PENK, IDS, KCNN2, KCNA1, C5orf13, JUN, DUSP7, DUSP6, EGR2, EGR1
GeneOntologyBiologicalProcess	GO:0048167	regulation of synaptic plasticity	1.53e-10	23	80	ADORA1, MAP1B, S100B, SYNGR1, ATP2B2, STXBP1, CAMK2A, SIPA1L1, HTT, GRM5, GSK3B, GRIN1, GRIN2C, HRAS, YWHAG, CPEB1, DBN1, DLG4, PTGS2, NPTN, EGR2, EGR1, ARC
GeneOntologyCellularComponent	GO:0045211	postsynaptic membrane	1.54e-10	33	158	LIN7A, ADORA1, GRASP, GABRA3, GABRA4, GABRA1, GABRA2, ANKS1B, GABRB2, GABRB3, DLGAP3, GRM2, GRM3, GRIA1, GRIA4, GRIN1, GRIK5, GRIN2C, ARHGAP32, LIN7C, CHRM1, LIN7B, CPEB1, KCNMA1, KCNB1, NCS1, GRIP1, DLG2, DLG4, HOMER1, NLGN2, CABP1, ARC
GeneOntologyBiologicalProcess	GO:0050804	regulation of synaptic transmission	1.73e-10	36	182	ADORA1, MAP1B, S100B, NISCH, SYNGR1, ATP2B2, GNAI2, STXBP1, CAMK2A, SIPA1L1, CACNA1B, CACNA1A, HTT, GRM2, GRM3, GRM5, GSK3B, GRIA4, GRIN1, GRIK5, GRIN2C, HRAS, YWHAG, CNR1, PRKACA, CPEB1, CACNA2D2, DBN1, NCS1, DLG4, NLGN2, PTGS2, NPTN, EGR2, EGR1, ARC
GeneOntologyBiologicalProcess	GO:0051969	regulation of transmission of nerve impulse	1.81e-10	37	191	ADORA1, MAP1B, S100B, NISCH, SYNGR1, ATP2B2, GNAI2, TF, STXBP1, CAMK2A, SIPA1L1, CACNA1B, CACNA1A, HTT, GRM2, GRM3, GRM5, GSK3B, GRIA4, GRIN1, GRIK5, GRIN2C, HRAS, YWHAG, CNR1, PRKACA, CPEB1, CACNA2D2, DBN1, NCS1, DLG4, NLGN2, PTGS2, NPTN, EGR2, EGR1, ARC
GeneOntologyCellularComponent	GO:0043025	cell soma	2.67e-10	45	271	ACSL4, ADORA1, PDE10A, MAP2K4, CPLX2, ALCAM, FABP7, CDK5R1, MAP1B, MAP2, SCN1A, MBP, S100B, APOD, ARHGEF2, ATP2B2, GOT2, TUBB4, BTD, ULK1, STRN3, PAM, KLHL24, CANX, CACNA1B, CACNA1A, RTN4, GSK3B, GRIA1, GRIA4, GRIK5, CADM2, PI4K2A, PDE1A, TNK2, DNER, KCNJ4, KCND2, KCNB1, TTLL7, HOMER1, DVL1, RAB2A, SLC12A5, CYGB
GeneOntologyMolecularFunction	GO:0008017	microtubule binding	7.22e-10	23	86	MAPRE2, MAP1B, MAP6, MAPT, APC, ARHGEF2, DST, APC2, HTT, APPBP2, MAP1LC3A, MAPRE3, CLIP2, HOOK1, CCDC88A, CRYAB, DCX, KIF5B, MACF1, KIF1B, CLASP2, HOOK3, VPS41
GeneOntologyBiologicalProcess	GO:0045664	regulation of neuron differentiation	1.45e-09	37	205	AKT1, ETV5, CDK5R1, MAP1B, MAPT, MBP, IL1RAPL1, CIT, ARHGDIA, RHOA, NTRK3, ULK1, PBX1, SIPA1L1, CACNA1A, HDAC2, RTN4, SOX5, GSK3B, GRIN1, RUFY3, YWHAG, HMGB1, CNR1, PRPF19, ID4, TTC3, METRN, CCDC88A, NUMBL, DBN1, DCC, C5orf13, NCS1, PTEN, ATN1, MAPK8IP3
MousePheno	MP:0000947	convulsive seizures	1.78e-09	34	126	NPAS4, MT2A, SLC1A2, SCN1A, MBP, CIT, FMR1, ATE1, ATP1A3, CELF4, GNAQ, B4GALNT1, TEF, CACNB4, CACNA1A, HTT, SYN2, GRM5, GRIN1, CNP, PLP1, DCX, CACNA2D2, DBP, S1PR2, KCNC1, KCNA1, KCNA2, NR4A3, QKI, PTGS2, PTEN, SLC12A5, PLCB1
GeneOntologyBiologicalProcess	GO:0007269	neurotransmitter secretion	2.26e-09	24	98	LIN7A, ADORA1, CPLX2, STXBP1, CAMK2A, VAMP2, CACNB4, CACNA1B, CACNA1A, SYT1, ERC2, SYN2, GRM2, GRIK5, LIN7C, RPH3A, RAB14, YWHAZ, LIN7B, TRIM9, NRXN3, NRXN2, NRXN1, DVL1
Drug	CID000001727	4-aminopyridine	4.61e-09	45	258	ADORA1, KCNQ5, SCN1B, ARAF, GABRA4, GABRA1, GABRA2, ATP1A3, GABRB2, KCNAB2, CACNA1B, CACNA1A, CACNA2D1, CACNA1D, SYN2, GRM2, GRM3, GRM5, GRIA1, GRIA4, GRIK5, GRINA, GRIN2C, CHRM1, HSPA8, HSPA4, PRKCI, PRKACA, CRH, UBTF, KCNMA1, KCNN2, KCNQ1, KCNJ4, KCND2, KCNC1, KCNB1, KCNH1, KCNA1, KCNA2, KCNH3, KCNIP2, KCNIP3, PTGS2, PTGS1
MousePheno	MP:0002886	abnormal glutamate-mediated receptor currents	5.23e-09	17	38	ADARB1, FABP7, GNAQ, DLGAP3, CACNB3, GRIA1, GRIA4, GRIN1, GRIN2C, PIP5K1C, NRXN3, NRXN2, NRXN1, DLG4, DHCR7, MAPK8IP1, ARC
GeneOntologyBiologicalProcess	GO:0006836	neurotransmitter transport	7.4e-09	33	180	LIN7A, SLC6A6, ADORA1, ADRBK1, STX1B, CPLX2, NISCH, GABRA2, SLC17A7, STXBP1, CAMK2A, VAMP2, CACNB4, CACNA1B, CACNA1A, SYT1, ERC2, SYN2, RTN4, GRM2, GRIK5, LIN7C, RPH3A, RAB14, YWHAZ, CNR1, LIN7B, TRIM9, NRXN3, NRXN2, NRXN1, PTGS1, DVL1
GeneOntologyBiologicalProcess	GO:0007409	axonogenesis	9.49e-09	42	268	ACTB, ALCAM, CDK5R1, MAP1B, MAPT, MBP, S100B, SEMA5A, S100A6, APC, DCLK1, ARHGDIA, RHOA, BAI1, NTRK3, TOP2B, ULK1, DST, STXBP1, STK11, CACNA1A, RTN4, BCL11B, GRIN1, KLF7, EVL, RUFY3, UNC5A, CNP, CREB1, METRN, DCX, KIF5C, NUMBL, DCC, PIP5K1C, NRXN3, NRXN1, MYCBP2, MAPK8IP3, EPHA4, EGR2
GeneOntologyBiologicalProcess	GO:0007611	learning or memory	1.01e-08	28	138	ACSL4, ATXN1, S100B, IL1RAPL1, FOS, ATP1A3, GM2A, HTT, GRM5, GRIA1, TMOD2, GRIN1, HRAS, PRKAR1B, CNR1, SHC3, VLDLR, CRH, COMT, ABI2, AAAS, JUN, DLG4, PTGS2, PTEN, EGR2, EGR1, PLCB1
MousePheno	MP:0004008	abnormal GABA-mediated receptor currents	1.53e-08	9	11	GABRA3, GABRA4, GABRA1, GABRA2, GABRB2, GABRB3, NRXN3, NRXN2, NRXN1
MousePheno	MP:0009357	abnormal seizure response to inducing agent	1.65e-08	33	130	MT3, MT2A, SLC1A2, CDK5R1, SCN1A, MAPT, GABRA1, CIT, FMR1, ATP1A3, CELF4, SEZ6, B4GALNT1, GFRA2, GFAP, TEF, SLC4A10, GRM5, GRIA4, GRIN1, GRIK5, CNR1, SLC12A6, PLP1, CACNA2D2, DBP, KCNA1, KCNA2, JUN, NR4A3, PTGS2, SLC12A5, PLCB1
Drug	CID000002910	cyclothiazide	1.72e-08	25	103	SLC1A2, MBP, GABRA3, GABRA4, GABRA1, GABRA2, FOS, ATP5O, SLC17A7, GABRB2, GABRB3, GFAP, CACNA1A, CACNB1, CACNA2D1, GRM2, GRM3, GRM5, GRIA1, GRIA4, GRIK5, GRINA, GRIN2C, KCNMA1, JUN
MousePheno	MP:0002915	abnormal synaptic depression	1.84e-08	25	82	ADORA1, CDK5R1, FMR1, NRGN, GNAQ, GFAP, CAMK2A, SYT1, SYN2, GRM2, GRIA1, GRIN1, CHRM1, SPRED1, PRKAR1B, CNR1, PRKACB, PLCB4, KCNMA1, PIP5K1C, GRIP1, NRXN3, NRXN2, NRXN1, ARHGEF9
GeneOntologyMolecularFunction	GO:0019900	kinase binding	1.92e-08	38	235	ACTB, ADAM10, MAP2K4, SLC2A1, SLC2A3, MAPT, MEF2A, APC, CCND1, TOP2B, BRAF, BTG1, CAMK2N2, SORBS1, PEA15, RBCK1, GSK3B, GRIA1, GLRX3, YWHAG, MAP2K7, PRKACA, VIM, PDPK1, ABI2, PLCB4, CCDC88A, PIK3R1, TRIB1, PRKRIP1, JUP, TAOK1, MAPK8IP1, DVL1, KIDINS220, ATN1, MAPK8IP3, MAP3K12
GeneOntologyMolecularFunction	GO:0003924	GTPase activity	2.11e-08	37	226	GNG2, DIRAS2, ARF5, ARF6, ARF3, GTPBP4, ARHGAP5, RHOA, TUBB4, GNG5, GNAQ, OPA1, GNAZ, GNB1, GNA12, GNAI2, DNM3, ARL8B, HRAS, RAB6B, RAB14, ATL2, DNM1L, RAP2B, RAN, DNM1, RASD2, GNG13, ARL8A, RAB2A, RAB5B, RAB27A, RAB5C, EIF2S3, RNF112, AGAP1, AGAP3
MousePheno	MP:0002062	abnormal conditioning behavior	3.44e-08	42	195	GRASP, FABP7, MAP2, MAPT, ATXN1, GABRA1, GABRA2, FMR1, FOS, NRGN, GM2A, GMFB, BRAF, GFAP, CAMK2A, CACNB3, CACNA1B, HDAC2, MCHR1, GRM5, GSK3B, GRIA1, TMOD2, GRIN1, GRIN2C, CNR1, CLIP2, PRKACB, VLDLR, CREB1, PENK, ABI2, DCX, DBN1, KCNMA1, KCNN2, C5orf13, PPP1R1B, GIT1, HOMER1, EIF4EBP2, ARC
Pathway	pi3kplctrkpathway	Trk receptor signaling mediated by PI3K and PLC-gamma	4.01e-08	14	35	AKT1, CCND1, CAMK2A, GSK3B, GRB2, HRAS, YWHAG, YWHAZ, YWHAE, CREB1, PDPK1, PIK3R1, EPB41L1, EGR1
GeneOntologyBiologicalProcess	GO:0031344	regulation of cell projection organization	4.99e-08	28	148	AKT1, MAP1B, MAPT, MBP, APC, IL1RAPL1, CIT, ARHGDIA, RHOA, NTRK3, ULK1, SIPA1L1, CACNA1A, HDAC2, RTN4, GSK3B, GRIN1, RUFY3, HMGB1, CNR1, METRN, CCDC88A, NUMBL, DBN1, DCC, NCS1, PTEN, LCN2
GeneOntologyBiologicalProcess	GO:0010975	regulation of neuron projection development	6.5e-08	20	83	AKT1, MAP1B, MBP, IL1RAPL1, ARHGDIA, RHOA, SIPA1L1, CACNA1A, HDAC2, RTN4, GSK3B, GRIN1, HMGB1, CNR1, CCDC88A, NUMBL, DBN1, DCC, NCS1, PTEN
MousePheno	MP:0002207	abnormal long term potentiation	9.22e-08	38	173	CPLX2, MAPT, ATXN1, S100B, FOS, SYNGR1, NRGN, BRAF, GFAP, CAMK2A, CACNB3, CACNA1B, HDAC2, NELL2, GRM5, GRIA1, TMOD2, GRIN1, PPP1R1A, HRAS, SPRED1, PRKAR1B, CNR1, PRKACB, VLDLR, CREB1, TYROBP, CPEB1, DAG1, KCNN2, KCNH3, DLG4, KCNIP3, EPHA4, ARHGEF9, EIF4EBP2, PTPRD, ARC
GeneOntologyCellularComponent	GO:0033267	axon part	1.43e-07	21	96	SNCB, ADORA1, MAP2K4, SYNJ2, SLC1A2, SCN1A, MBP, APC, TUBB4, GABRB3, KCNAB2, CACNA1B, GRIA4, GRIK5, CHRM1, KCNMA1, KCNA1, KCNA2, MAPK8IP3, EPB41L3, MAP3K12
GeneOntologyCellularComponent	GO:0019717	synaptosome	1.59e-07	24	122	LIN7A, SNCB, FMR1, FOS, CADM1, ZMYND19, BRAF, SLC17A7, VAMP2, CACNA1B, ERC2, GRIA1, GRIN1, GRIK5, LIN7C, RPH3A, MAGI2, LIN7B, TRIM9, KCND2, SEPT3, DLG4, HOMER1, DVL1
MousePheno	MP:0002910	abnormal excitatory postsynaptic currents	1.82e-07	24	85	LIN7A, ADORA1, STX1B, CPLX2, SEZ6, SLC17A7, CAMK2A, VAMP2, CACNA1A, SYT1, GRIN1, GRIK5, GRIN2C, LIN7C, CHRM1, LIN7B, TYROBP, DNER, S1PR2, NRXN3, RORA, NRXN2, NRXN1, DLG2
MousePheno	MP:0000801	abnormal temporal lobe morphology	2.25e-07	45	230	MT3, SLC1A2, FABP7, CDK5R1, MAP1B, MAP2, MAPT, BRSK2, CIT, DCLK1, ATP1A3, CADM1, ATP2B2, ATRX, GJA1, GNAQ, GM2A, TOP2B, GFAP, HTT, HDAC2, NFIB, KLF7, CHRM1, YWHAE, CKMT1B, VLDLR, VIM, SLC12A6, ID4, ABI2, CRYAB, DCX, DAG1, NUMBL, KCNA1, NR4A3, DLG4, INPP4A, KIF1B, PTEN, MYCBP2, MAPK8IP3, SLC30A3, PLCB1
MousePheno	MP:0003997	tonic-clonic seizures	3.08e-07	18	53	MT2A, SCN1A, ATE1, CELF4, GNAQ, B4GALNT1, TEF, HTT, GRIN1, PLP1, DCX, DBP, S1PR2, KCNA1, NR4A3, PTGS2, PTEN, SLC12A5
GeneOntologyBiologicalProcess	GO:0007270	nerve-nerve synaptic transmission	3.13e-07	18	75	ADORA1, NISCH, GABRB3, STXBP1, CACNB4, CACNA1A, GRM2, GRM3, TMOD2, GRIA4, GRIN1, GRIK5, HRAS, CNR1, SHC3, PRKACA, PTGS2, KIF1B
Pathway	P00039	Metabotropic glutamate receptor group III	3.37e-07	18	65	STX1B, SLC1A2, GNG2, GNB1, GNAI2, SLC17A7, VAMP2, CACNA1B, CACNA1A, CACNB1, GRM5, GRIA1, GRIA4, GRIN1, GRIK5, GRIN2C, PRKAR1B, PRKACA
MousePheno	MP:0002912	abnormal excitatory postsynaptic potential	4.24e-07	20	65	ADORA1, ATXN1, NRGN, SEZ6, SLC17A7, GFAP, CAMK2A, DLGAP3, CACNA1B, CACNA1A, GRM2, GRM5, GRIA1, GRIA4, CHRM1, SPRED1, CNR1, KCNN2, DLG2, ARHGEF9
MousePheno	MP:0001468	abnormal temporal memory	4.47e-07	25	95	FABP7, MAP2, MAPT, FOS, NRGN, SLC17A7, CAMK2A, CACNB3, HDAC2, GRM5, GSK3B, TMOD2, GRIN1, GRIN2C, CLIP2, VLDLR, CREB1, CREBBP, ABI2, KCNN2, C5orf13, KCNH3, GIT1, EGR1, ARC
GeneOntologyBiologicalProcess	GO:0048168	regulation of neuronal synaptic plasticity	4.96e-07	14	48	S100B, SYNGR1, CAMK2A, GRM5, GSK3B, GRIN1, HRAS, CPEB1, DBN1, DLG4, NPTN, EGR2, EGR1, ARC
Pathway	wnt_canonical_pathway	Canonical Wnt signaling pathway	5.07e-07	13	36	AES, APC, CCND1, TCF4, GSK3B, NLK, CREBBP, CSNK2A1, CSNK1A1, RAN, MACF1, DVL1, FBXW11
GeneOntologyMolecularFunction	GO:0030165	PDZ domain binding	5.39e-07	17	70	LIN7A, MPP2, GRASP, SYNJ2, CADM1, ATP2B2, ATP2B1, GJA1, GRIA1, GRIN2C, LIN7C, KIRREL3, SLC9A3R1, DLG2, DLG4, PTEN, NOS1AP
GeneOntologyCellularComponent	GO:0048770	pigment granule	5.44e-07	20	95	DNAJC5, SLC2A1, ANXA11, SYNGR1, ATP6V0A1, TFRC, CANX, TMEM33, HSPA8, HSP90AB1, YWHAZ, YWHAE, CNP, PDCD6IP, RAN, RAB2A, RAB5B, RAB27A, RAB5C, SND1
GeneOntologyCellularComponent	GO:0042734	presynaptic membrane	5.49e-07	14	49	ADORA1, SLC1A2, CAMK2A, SYT1, ERC2, LRRC4B, GRM2, GRM3, GRIK5, KCNMA1, NRXN3, NRXN2, NRXN1, NPTN
GeneOntologyBiologicalProcess	GO:0000375	RNA splicing, via transesterification reactions	5.58e-07	29	175	SF3B2, SNRPD2, SNRNP70, PAPOLA, SFRS8, SFPQ, SFRS6, SFRS2IP, CELF4, BCAS2, RBM25, KHSRP, GTF2F2, CELF2, SRPK2, POLR2A, TGS1, SF1, HNRNPU, HNRNPL, SF3B14, PRPF19, PTBP2, CPSF3, HNRNPR, CCAR1, RBM5, PABPN1, SF3B1
Pathway	ST_DIFFERENTIATION_PATHWAY_IN_PC12_CELLS	ST_DIFFERENTIATION_PATHWAY_IN_PC12_CELLS	5.85e-07	15	48	MAP2K4, AKT1, MAP1B, GNAQ, BRAF, MAP2K7, CREB1, CREBBP, PIK3R1, DAG1, JUN, MAPK8IP1, MAPK8IP3, EGR2, EGR1
Drug	C044101	endotoxin, Escherichia coli	6.92e-07	13	38	APLP1, GMFB, NFKBIA, HSPB1, HSP90AB1, OTUB1, CREBBP, IFNGR2, JUN, PTGS2, C1QTNF4, MAPK8IP3, C1QL3
Drug	CID000005070	riluzole	7.09e-07	31	174	SLC1A2, MAP2, SCN1B, GABRA3, GABRA4, GABRA1, GABRA2, GMFB, SLC17A7, GABRB2, GABRB3, GFAP, NRG3, CACNB4, CACNB3, PDLIM4, CACNA1B, CACNA1A, CACNB1, CACNA2D1, CACNA1D, GRM2, GRM3, GRM5, GRIA1, GRIA4, GRIK5, GRINA, GRIN2C, CACNA2D2, KCNC1
GeneOntologyBiologicalProcess	GO:0003001	generation of a signal involved in cell-cell signaling	7.33e-07	36	248	LIN7A, ACVR2B, ADORA1, CPLX2, ACVR1C, STXBP1, CAMK2A, VAMP2, CACNB4, CACNA1B, CACNA1A, HTT, SYT1, ERC2, SYN2, RTN4, GRM2, NNAT, GRIK5, LIN7C, RPH3A, RAB14, YWHAZ, CNR1, LIN7B, TRIM9, CRH, CREB1, KCNQ1, RFX3, NRXN3, NRXN2, NRXN1, INHBA, PTGS1, DVL1
GeneOntologyBiologicalProcess	GO:0090004	positive regulation of establishment of protein localization to plasma membrane	7.63e-07	5	5	AKT1, SORBS1, PRKCI, PDPK1, PIK3R1
Drug	CID000001207	MK-801	7.91e-07	44	296	FSCN1, ADORA1, PDE10A, MAP2K4, SLC1A2, MAP2, S100B, GABRA3, GABRA4, GABRA1, GABRA2, CIT, FOS, GABRB2, GABRB3, GFAP, CACNA2D1, CACNA1D, HBA2, SOX10, NFKBIA, GRM2, GRM3, GRM5, GRIA1, GRIA4, GRIN1, GRIK5, GRINA, GRIN2C, CHRM1, HSPA4, CNR1, CREB1, PENK, COMT, JUN, JUNB, DLG4, PPP1R1B, EGR2, EGR1, ARC, CYGB
Pathway	h_dreampathway	Repression of Pain Sensation by the Transcriptional Regulator DREAM	8.68e-07	7	10	FOS, POLR2A, PRKAR1B, CREB1, CREBBP, JUN, KCNIP3
MousePheno	MP:0002885	abnormal AMPA-mediated synaptic currents	1.01e-06	9	15	ADARB1, GRIA1, GRIA4, GRIN1, NRXN3, NRXN2, NRXN1, DLG4, ARC
GeneOntologyMolecularFunction	GO:0032403	protein complex binding	1.04e-06	40	295	TLN2, ACTN1, ACVR2B, ADAM10, ADORA1, AP2B1, MAP1B, NISCH, ACVR1C, PHIP, ATP5O, GNAQ, TXN2, CCND1, ULK1, STRN3, DST, STK11, VAMP2, RTN4, SORBS1, SPTBN1, NFKBIA, RPH3A, PI4K2A, YWHAZ, MAGI2, PRKACA, PEX6, PDPK1, IGF2, EDIL3, PCSK2, CTGF, PIK3R1, PSMD14, NPTXR, DNM1, ITGA6, ING2
GeneOntologyBiologicalProcess	GO:0016358	dendrite development	1.05e-06	17	73	ACSL4, MAP1B, MAP2, CIT, DCLK1, RHOA, SIPA1L1, CACNA1A, GSK3B, GRIN1, KLF7, ABI2, DCX, NUMBL, DBN1, DVL1, CELSR2
GeneOntologyCellularComponent	GO:0043197	dendritic spine	1.05e-06	17	74	ADRBK1, SLC1A2, CDK5R1, FMR1, ANKS1B, CANX, DLGAP3, SIPA1L1, DNM3, GRM3, GRM5, GSK3B, GRIA1, GRIN1, ARHGAP32, KCND2, ARC
Interaction	HPRD:03943	Regulator of G protein signaling 12	1.17e-06	9	16	ARAF, GNAI2, CACNA1B, GRM2, GRM5, HRAS, YWHAG, MAP2K2, PLCB1
Drug	D013849	Thimerosal	1.18e-06	15	52	FOS, PHF20L1, CITED2, MED18, TMOD2, GRIN1, GRIK5, HSPB1, HSPA1B, CPEB3, NR4A1, CRYAB, JUN, DUSP1, ARC
MousePheno	MP:0000950	abnormal seizure response to pharmacological agent	1.38e-06	24	94	MT3, MT2A, SLC1A2, CDK5R1, SCN1A, MAPT, GABRA1, CIT, SEZ6, GFAP, SLC4A10, GRIA4, GRIN1, GRIK5, CNR1, SLC12A6, CACNA2D2, KCNA1, KCNA2, JUN, NR4A3, PTGS2, SLC12A5, PLCB1
Drug	DB00996	Gabapentin	1.46e-06	5	5	ADORA1, BCAT1, CACNA1B, CACNA2D1, CACNA2D2
Drug	D010890	Pirenzepine	1.46e-06	5	5	FOS, CHRM1, JUNB, EGR2, EGR1
Drug	CID000004497	nimodipine	1.51e-06	27	145	APLP1, ARF5, GABRA4, GABRA1, GABRA2, ATP2B2, ATP2B1, GABRB2, CACNB4, CACNB3, CACNA1B, CACNA1A, CACNB1, CACNA2D1, CACNA1D, GRM2, GRM3, GRM5, GRINA, GRIN2C, CDK14, PENK, IGF2, CACNA2D2, JUN, EGR1, ATP2C1
GeneFamily	CENT	Centaurins	1.71e-06	6	14	ADAP1, ASAP1, ACAP3, AGAP1, ARAP2, AGAP3
GeneOntologyBiologicalProcess	GO:0035249	synaptic transmission, glutamatergic	1.73e-06	12	39	ADORA1, CACNB4, CACNA1A, GRM2, GRM3, GRIA4, GRIN1, GRIK5, CNR1, SHC3, PRKACA, PTGS2
Pathway	lysophospholipid_pathway	LPA receptor mediated events	1.73e-06	17	65	ADCY3, AKT1, GNG2, MAPT, RHOA, FOS, GNAQ, GNAZ, GNB1, GNA12, GNAI2, NFKBIA, GSK3B, HRAS, PIK3R1, JUN, SLC9A3R2
GeneFamily	KCN	Potassium channels	1.86e-06	13	88	KCNQ5, KCNAB2, KCNMA1, KCNN2, KCNQ1, KCNJ4, KCND2, KCNC1, KCNB1, KCNH1, KCNA1, KCNA2, KCNH3
GeneOntologyMolecularFunction	GO:0003713	transcription coactivator activity	1.94e-06	33	227	ZMIZ2, SMARCC1, SMARCA4, SMARCA2, NRIP1, CITED2, TCF20, NR2F1, TAF10, SOX10, CARM1, KLF7, MED1, HMGA1, CUTA, THRAP3, MED16, ATF2, CREBBP, NR2C2, USP22, DCC, CRTC1, RAN, JUP, JUNB, MLL5, GRIP1, RBM39, PRDM16, RGL2, MYSM1, WWC1
Pathway	hedgehog_glipathway	Hedgehog signaling events mediated by Gli proteins	2e-06	14	46	AKT1, GNG2, GNAZ, GNB1, GNAI2, HDAC2, GSK3B, PRKACA, CREBBP, CSNK1D, CSNK1A1, CSNK1G2, RBBP4, FBXW11
Interaction	HPRD:03004	Calcium channel, voltage dependent, P/Q type, alpha 1A subunit	2.05e-06	6	7	GNB1, CACNB4, CACNA1A, CACNB1, SYT1, CABP1
Pathway	CALCIUM_REGULATION_IN_CARDIAC_CELLS	CALCIUM_REGULATION_IN_CARDIAC_CELLS	2.12e-06	27	143	SLC8A1, ADCY3, GNG2, ATP2B2, ATP2B1, ATP1B2, GJB2, GJA1, GNG5, GNAQ, GNAZ, GNB1, GNAI2, CAMK2A, CACNB3, CACNA1B, CACNA1A, CACNB1, CACNA1D, RGS5, PEA15, CHRM1, PRKAR1B, PRKACB, PRKACA, KCNB1, GNG13
Drug	CID000093460	VOLTAGE	2.17e-06	22	106	KCNQ5, SCN1B, TFRC, KCNAB2, CACNB3, CACNA1B, CACNA1A, CACNB1, CACNA2D1, CACNA1D, CHRM1, HK1, AKAP9, CACNA2D2, KCNQ1, KCND2, KCNC1, KCNB1, KCNH1, KCNA1, KCNA2, KCNH3
MousePheno	MP:0002945	abnormal inhibitory postsynaptic currents	2.44e-06	18	60	NPAS4, CPLX2, IL1RAPL1, GABRA4, GABRA1, CACNA1B, SYT1, ERC2, CHRM1, CNR1, TYROBP, DCX, PIP5K1C, KCNA1, NRXN2, DNM1, PTGS2, ARHGEF9
Pathway	ps1pathway	Presenilin action in Notch and Wnt signaling	2.66e-06	14	47	ADAM10, AES, APC, FOS, CCND1, NEDD4, GSK3B, NLK, CREBBP, CSNK2A1, CSNK1A1, JUN, DVL1, FBXW11
GeneOntologyMolecularFunction	GO:0001883	purine nucleoside binding	2.71e-06	34	241	SMARCA4, SMARCA2, WNK1, ADORA1, PDE10A, MAP2K4, AKT1, BRSK2, ATP5A1, ATP2B2, DNAJA2, DGKZ, SULT1A1, TAP1, SBNO1, ARL8B, GSK3B, CHKA, RAB14, MAP2K2, MAP2K7, XDH, HNRNPU, PRKAR1B, HK1, PRKAA2, PFKP, ABCC5, PDE1A, CSNK1D, CSNK1A1, CSNK1G2, ILF2, RAB2A
MousePheno	MP:0009747	impaired behavioral response to xenobiotic	3.28e-06	19	67	EHMT2, GRASP, S100A10, GABRA4, GABRA1, GABRA2, AQP4, GNAZ, GABRB3, CACNB4, CACNA1B, CACNA2D1, MCHR1, GRM5, GRIN1, GPRASP1, CNR1, DLG4, PPP1R1B
Drug	CID000003446	gabapentin	3.51e-06	29	169	FSCN1, ADORA1, SCN1B, GABRA3, GABRA4, GABRA1, GABRA2, SLC36A1, GOT2, BCAT1, GABRB2, GABRB3, CACNB4, CACNB3, CACNA1B, CACNA1A, CACNB1, CACNA2D1, CACNA1D, GRM2, GRM3, GRM5, GRIA1, GRIA4, GRIK5, GRINA, GRIN2C, PENK, CACNA2D2
GeneOntologyCellularComponent	GO:0030659	cytoplasmic vesicle membrane	3.59e-06	34	247	TMED2, ACTN1, AP2B1, AP2A2, AP2A1, SLC2A3, GABRA2, SYNGR1, ATP6V0A1, GJA1, ATP8A1, SEC24B, ULK1, SLC17A7, CAMK2A, VAMP2, SYT1, SYN2, APPBP2, SREBF2, GRIA1, GRIA4, RPH3A, EPN2, PI4K2A, ZNRF1, KCNQ1, DLG4, SPRED2, KIF1B, SYT3, SYT11, RAB27A, SLC30A3
GeneOntologyBiologicalProcess	GO:0007214	gamma-aminobutyric acid signaling pathway	3.64e-06	9	23	GABRA3, GABRA4, GABRA1, GABRA2, GNAI2, GABRB2, GABRB3, CACNB4, CACNA1A
Pathway	hsa04010	MAPK signaling pathway	3.64e-06	41	275	MAP2K4, AKT1, MAPT, MEF2C, MAP3K5, ACVR1C, FLNB, FOS, ATF4, GNA12, BRAF, CACNB4, CACNB3, CACNA1B, CACNA1A, CACNB1, CACNA2D1, CACNA1D, GRB2, HRAS, HSPB1, HSPA8, HSPA1B, NR4A1, MAP2K2, MAP2K7, PRKACB, PRKACA, NLK, ATF2, RASGRP1, CACNA2D2, JUN, TAOK1, MAPK8IP1, DUSP7, DUSP6, DUSP8, DUSP1, MAPK8IP3, MAP3K12
MousePheno	MP:0001399	hyperactivity	3.65e-06	40	214	EHMT2, NPAS4, FABP7, MAP6, ATXN2, GABRA3, GABRA1, FMR1, FOS, ATE1, ATP1A3, CELF4, TOM1L2, BRAF, GABRB2, GABRB3, CAMK2A, CACNA1B, HTT, CBL, MCHR1, GRM2, GRIA1, TMOD2, GRIA4, GRIN1, CHRM1, CNR1, VLDLR, VIM, ATF2, ACTL6B, RCAN2, CACNA2D2, KCNQ1, KCNC1, NR4A3, PPP1R1B, KCNIP3, PLCB1
Drug	CID000002818	clozapine	3.92e-06	40	274	ADAR, SLC1A2, APOD, GABRA3, GABRA4, GABRA1, GABRA2, FOS, NUPR1, SLC17A7, GABRB2, GABRB3, NRG3, HDAC2, MCHR1, GRM2, GRM3, GRM5, GSK3B, GRIA1, GRIA4, GRIN1, GRIK5, GRINA, GRIN2C, CHGA, CNO, CHRM1, HSPA4, NR4A1, PRKCI, CRH, CREB1, PENK, COMT, KCND2, DLG4, RASAL2, PTGS1, EGR1
GeneFamily	RNF	RING-type zinc fingers	3.94e-06	20	209	TRIM44, RC3H2, MARCH6, CBL, RBCK1, RNF165, CNBP, RBX1, TRIM9, DTX3, RNF126, TTC3, RNF208, ZNRF1, RNF130, TRIM2, TRIM27, RNF19B, TRIM8, RNF112
Interaction	HPRD:10068	MAP3K2	4.05e-06	8	14	WNK1, MAP2K4, MAP3K5, NFKBIA, YWHAG, YWHAZ, YWHAE, MAP2K7
Interaction	HPRD:06256	Adaptor related protein complex 2, alpha2 subunit	4.05e-06	8	14	EPS15, AP2B1, AP2A2, BIN1, EPN1, HTT, DNAJC6, DNM1
MousePheno	MP:0002888	abnormal NMDA-mediated synaptic currents	4.09e-06	10	21	FABP7, DLGAP3, CACNB3, GRIN1, GRIN2C, NRXN3, NRXN2, NRXN1, DLG4, MAPK8IP1
MousePheno	MP:0008415	abnormal neurite morphology	4.31e-06	34	170	DGCR8, MAP1B, MAPT, SCN1B, MBP, DCLK1, FMR1, FOS, SEZ6, SLC17A7, DST, NR2F1, FJX1, CAMK2A, CACNA1A, GRIA1, EVL, POU3F1, PI4K2A, CNP, SLC12A6, UGCG, DNM1L, TYROBP, PLP1, PLEC, ACTL6B, TRIM2, SBF2, DAG1, CACNA2D2, QKI, EPHA4, EGR2
MousePheno	MP:0008026	abnormal brain white matter morphology	4.33e-06	30	141	MAP2K4, CDK5R1, MAP1B, MAP2, DCLK1, ARHGAP5, GFAP, NR2F1, CACNB3, HTT, ATCAY, NFIB, KLF7, EVL, CNP, CLIP2, DNM1L, PLP1, ABI2, NDST1, DCX, NUMBL, DCC, DHCR7, QKI, KIF1B, MYCBP2, MAPK8IP3, EPHA4, MAP3K12
MousePheno	MP:0001393	ataxia	4.34e-06	42	231	DNAJC5, STX1B, MAP2K4, MAP1B, SCN1A, MAPT, SCN1B, MBP, ATXN1, APLP2, CIT, ATP2B2, KIF1A, GJA1, GNAQ, B4GALNT1, DST, CANX, CACNB4, CACNA1A, ATCAY, GRIA4, GRIN1, CNP, VLDLR, NLK, ATF2, SLC12A6, UGCG, PLP1, PLCB4, TRIM2, CACNA2D2, KCNMA1, DCC, KCNC1, KCNA1, RORA, INPP4A, QKI, MAPK8IP1, PTEN
Pathway	ar_nongenomic_pathway	Nongenotropic Androgen signaling	4.76e-06	11	31	AKT1, GNG2, FOS, GNAZ, GNB1, GNAI2, HRAS, MAP2K2, CREB1, PIK3R1, PLCB1
Drug	D010424	Pentobarbital	4.82e-06	22	111	SLC2A1, GABRA4, GABRA1, GABRA2, FOS, NTRK3, GJB2, GABRB2, GABRB3, GFAP, GRIN1, GRIN2C, MED1, HSPB1, NR4A1, CNR1, CRH, PENK, JUN, JUNB, PTGS2, PTGS1
Drug	CID000068736	CGS 19755	4.86e-06	12	38	FOS, NTRK3, GRM2, GRM3, GRM5, GRIA1, GRIA4, GRIK5, GRINA, GRIN2C, PCP4, EGR1
GeneOntologyBiologicalProcess	GO:0032870	cellular response to hormone stimulus	4.92e-06	26	164	SMARCC1, ADCY3, AKT1, GNG2, FOS, PHIP, GNG5, GNB1, SORBS1, GRB2, PRKCI, PRKAR1B, PRKACB, PRKACA, VLDLR, PDPK1, IGF2, UBE2B, NAMPT, PIK3R1, ZFP106, JUNB, GPAM, GNG13, DUSP1, EIF4EBP2
GeneOntologyCellularComponent	GO:0030672	synaptic vesicle membrane	5.69e-06	13	51	SLC2A3, GABRA2, SYNGR1, SLC17A7, VAMP2, SYT1, SYN2, RPH3A, PI4K2A, ZNRF1, SYT3, SYT11, SLC30A3
GeneOntologyBiologicalProcess	GO:0048813	dendrite morphogenesis	6.8e-06	11	37	CIT, DCLK1, SIPA1L1, CACNA1A, GSK3B, GRIN1, KLF7, DCX, NUMBL, DVL1, CELSR2
Drug	DB00690	Flurazepam	6.94e-06	6	9	GABRA3, GABRA4, GABRA1, GABRA2, GABRB2, GABRB3
GeneOntologyCellularComponent	GO:0008021	synaptic vesicle	7.07e-06	19	102	MT3, SLC2A3, BIN1, GABRA2, SYNGR1, CADM1, SLC17A7, VAMP2, SYT1, SYN2, GRIN1, RPH3A, PI4K2A, TRIM9, ZNRF1, SYT3, ATP6V1G1, SYT11, SLC30A3
MousePheno	MP:0001968	abnormal touch/ nociception	7.28e-06	36	189	ADORA1, GRASP, NR2F6, CDK5R1, MAP1B, BRSK2, S100A10, S100B, GABRA4, FMR1, KIF1A, GNAQ, GNAZ, SLC17A7, DST, CACNA1B, CACNA1A, NBL1, GRIA1, GRIA4, GRIK5, KLF7, PRKAR1B, CNR1, PENK, PCSK2, KCND2, KCNA1, DLG2, DLG4, KCNIP3, PTGS2, KIF1B, PTGS1, NPEPPS, SLC12A5
MousePheno	MP:0001405	impaired coordination	7.58e-06	46	268	DNAJC5, B4GALT2, MAP2K4, CPLX2, SLC2A1, ATXN1, ATXN2, GABRA1, FMR1, ATP1B2, NTRK3, SEZ6, GNAQ, OPA1, GM2A, CCND1, SLC17A7, B4GALNT1, GABRB3, DST, UBE4B, CACNB4, CACNA1A, HTT, GRM2, GRIN1, GRIN2C, TRAK1, CNP, CLIP2, VIM, SLC12A6, PLP1, PLCB4, SBF2, DNER, KIF5A, CACNA2D2, KCNMA1, KCNQ1, KCNC1, RORB, RORA, RASD2, KIF1B, EGR2
Drug	C058305	phenethyl isothiocyanate	9.94e-06	24	133	SF3B2, MAP2, TTC14, ATRX, GJA1, GNG5, BLVRB, DST, THOC2, ENC1, SBNO1, MTF2, MATR3, HSPB1, ESF1, UBTF, TPR, PHF15, ZC3H13, PTGS2, REEP5, BTG2, NCOR1, EIF4G1
GeneOntologyMolecularFunction	GO:0022843	voltage-gated cation channel activity	1.04e-05	24	151	KCNQ5, SCN1A, SCN1B, KCNAB2, CACNB4, CACNB3, CACNA1B, CACNA1A, CACNB1, CACNA2D1, CACNA1D, GRIN1, CACNA2D2, KCNMA1, KCNQ1, KCNJ4, KCND2, KCNC1, KCNB1, KCNH1, KCNA1, KCNA2, KCNH3, KCNIP2
Drug	CID000001206	methamphetamine	1.04e-05	27	160	ACTB, ADORA1, SLC1A2, MAPT, MAZ, FOS, SLC17A7, GABRB2, GFAP, SOX10, GRM2, GRM5, GRINA, GRIN2C, HSPB1, NR4A1, YWHAE, CRY1, CREB1, PENK, CSMD1, JUN, PPP1R1B, HOMER1, PTGS1, DUSP6, DUSP1
MousePheno	MP:0008220	abnormal ventral commissure morphology	1.14e-05	14	43	MAP2K4, MAP1B, MAP2, DCLK1, ARHGAP5, NR2F1, HTT, KLF7, NDST1, DCX, MYCBP2, MAPK8IP3, EPHA4, MAP3K12
MousePheno	MP:0004753	abnormal miniature excitatory postsynaptic currents	1.14e-05	14	43	NPAS4, STX1B, CPLX2, SLC17A7, VAMP2, CACNA1B, CACNA1A, GRIN1, GRIN2C, CHRM1, PIP5K1C, DNM1, EPHA4, ARC
Pathway	reelinpathway	Reelin signaling pathway	1.22e-05	10	28	AKT1, CDK5R1, MAP1B, MAPT, ARHGEF2, CBL, GSK3B, MAP2K7, VLDLR, PIK3R1
Pathway	ST_GRANULE_CELL_SURVIVAL_PATHWAY	ST_GRANULE_CELL_SURVIVAL_PATHWAY	1.22e-05	10	28	MAP2K4, APC, FOS, GNAQ, MAP2K7, CREB1, DAG1, JUN, MAPK8IP1, MAPK8IP3
GeneOntologyMolecularFunction	GO:0008022	protein C-terminus binding	1.41e-05	26	174	SMARCC1, BIN1, ATXN1, ATXN2, ATF4, CADM1, TOP2B, TCF4, DST, CACNA1B, TBL1X, NEDD4, MCHR1, SREBF2, HRAS, MAP2K7, VIM, PEX6, PIK3R1, ANP32A, SLC9A3R2, GRIP1, SLC9A3R1, DLG4, KCNIP3, ZBTB16
Pathway	hsa04720	Long-term potentiation	1.41e-05	17	75	ARAF, ATF4, GNAQ, BRAF, CAMK2A, GRM5, GRIA1, GRIN1, GRIN2C, PPP1R1A, HRAS, MAP2K2, PRKACB, PRKACA, CREBBP, PLCB4, PLCB1
Interaction	109072	Affinity Capture-MS	1.41e-05	7	12	APC, APLP2, ARAF, BRAF, CSNK2A1, DYRK1A, MARK2
Pathway	P00041	Metabotropic glutamate receptor group I	1.42e-05	9	23	NAA15, GRM5, GRIN1, GRIK5, GRINA, GRIN2C, PRKAR1B, PRKACA, HOMER1
GeneOntologyMolecularFunction	GO:0008331	high voltage-gated calcium channel activity	1.43e-05	5	7	CACNB4, CACNB3, CACNA1A, CACNB1, CACNA1D
GeneOntologyBiologicalProcess	GO:0006605	protein targeting	1.43e-05	37	293	AKT1, MXI1, RHOA, SYNGR1, TOMM40, SEC62, CACNB1, HTT, NEDD4, SPTBN1, NFKBIA, SSR1, GSK3B, PRICKLE1, TRAK1, CFL1, YWHAG, YWHAZ, YWHAE, G3BP2, PRKCI, PRKACA, XPO7, PEX6, TRPS1, TPR, KPNA1, RANBP2, RAN, JUP, JUN, SEC61G, MACF1, UHMK1, RAB27A, ARL6IP1, TNPO1
GeneOntologyBiologicalProcess	GO:0000245	spliceosome assembly	1.56e-05	11	40	SNRPD2, SFRS8, SFRS6, SFRS2IP, CELF4, CELF2, SRPK2, SF1, PRPF19, PTBP2, RBM5
Drug	CID000005466	hydrochloride	1.68e-05	25	146	SLC1A2, GABRA3, GABRA4, GABRA1, GABRA2, FOS, MGAT3, ATP5A1, GNA12, SLC17A7, GABRB2, GABRB3, CACNA1B, CACNA2D1, KRIT1, TAP1, GRM2, GRM3, GRM5, GRIA1, GRIA4, GRIK5, CHRM1, NR1D2, COMT
MousePheno	MP:0000813	abnormal hippocampus layer morphology	1.71e-05	18	68	SLC1A2, CDK5R1, MAP1B, MAP2, MAPT, DCLK1, ATP1A3, ATRX, TOP2B, HDAC2, KLF7, YWHAE, ABI2, DCX, DAG1, NR4A3, DLG4, PTEN
MousePheno	MP:0000875	abnormal cerebellar Purkinje cell layer	1.84e-05	32	166	B4GALT2, MAP2K4, LDB1, CDK5R1, MAP1B, MAP2, ATXN1, CIT, FMR1, ATP2B2, GJA1, GM2A, CCND1, B4GALNT1, UBE4B, CACNA1A, PI4K2A, CNP, VLDLR, VIM, ATF2, UGCG, DNM1L, TRIM2, DNER, CACNA2D2, RORA, INPP4A, QKI, MAPK8IP1, PTEN, NR1D1
Pathway	mtor_v2pathway	mTOR signaling pathway	1.85e-05	16	69	AKT1, RHOA, DDIT4, BRAF, ULK1, DEPDC6, HRAS, YWHAG, YWHAZ, YWHAE, MAP2K2, PDPK1, AKT1S1, EIF4A1, EIF4B, FBXW11
Pathway	DREAMPATHWAY	DREAMPATHWAY	1.93e-05	7	14	FOS, POLR2A, PRKAR1B, PRKACB, CREB1, JUN, KCNIP3
Pathway	erbb1_downstream_pathway	ErbB1 downstream signaling	1.99e-05	22	117	MAP2K4, AKT1, MEF2C, WASL, FOS, BRAF, GRB2, HRAS, YWHAG, YWHAZ, YWHAE, MAP2K2, CREB1, ATF2, ARPC4, PDPK1, PIK3R1, JUN, DUSP6, DUSP1, AKT1S1, EGR1
Drug	CID000003932	linopirdine	2e-05	12	43	KCNQ5, FOS, ATP2B2, ATP2B1, SLC17A7, BTF3, CHRM1, KCNMA1, KCNQ1, KCNC1, KCNH1, KCNH3
GeneOntologyBiologicalProcess	GO:0043269	regulation of ion transport	2.04e-05	21	127	SLC8A1, ADORA1, AKT1, IL1RAPL1, RHOA, ATP2B2, GJA1, GNAQ, GNAI2, CACNB4, CACNA2D1, NEDD4, MCHR1, CNR1, HK1, PLCB4, NCS1, SLC9A3R1, FXYD7, HOMER1, PTGS2
GeneOntologyCellularComponent	GO:0034704	calcium channel complex	2.08e-05	9	28	CACNB4, CACNB3, CACNA1B, CACNA1A, CACNB1, CACNA2D1, CACNA1D, PPP2R4, CACNA2D2
Drug	D024505	Tocopherols	2.11e-05	16	72	DNAJC5, SNCB, CPLX2, CDK5R1, ARF3, SYNGR1, ATP1B2, CCND1, STXBP1, VAMP2, SYN2, GRIN1, RAB6B, TTC3, SYT11, EGR1
Interaction	116538	Two-hybrid	2.14e-05	5	6	NRXN3, NRXN2, NRXN1, DLG2, DLG4
Drug	CID000003007	amphetamine	2.2e-05	39	284	FASTK, ADCY3, SNCB, ADRBK1, PDE10A, SEMA5A, FOS, GJA1, OPA1, SLC17A7, CAMK2A, CACNA1B, CACNA2D1, CAMK1D, SYN2, SOX10, MCHR1, GRM2, GRM3, GRM5, GSK3B, GRIA1, GRIA4, GRINA, GRIN2C, CHRM1, HSPA4, NR4A1, PRKCI, CRH, CREB1, PENK, PDPK1, DNM1L, COMT, JUN, PPP1R1B, DUSP8, EGR1
Drug	D014501	Uranium	2.27e-05	36	254	SLC8A1, ACTB, ADAR, SMARCC1, EPS15, MT2A, SLC2A3, KDM5B, APC, WASL, SCP2, RHOA, FOS, B2M, SEC24B, BTF3, TDG, DNAJA2, TF, TFRC, CANX, GRB2, EVL, PI4K2A, HMGB1, KDM2B, PDCD6IP, PDE1A, ID2, NAMPT, PIK3R1, RAN, BAALC, KIF1B, EVI5, PUM1
MousePheno	MP:0001463	abnormal spatial learning	2.39e-05	30	153	B4GALT2, CPLX2, CDK5R1, MAPT, ATXN1, APOD, FMR1, FOS, ATP1A3, NRGN, SEZ6, BRAF, CAMK2A, CACNA1B, GRM5, TMOD2, GRIN1, SPRED1, CKMT1B, CREB1, DCX, KCNN2, C5orf13, DLG4, KCNIP3, ARHGEF9, EIF4EBP2, PTPRD, PLCB1, ARC
GeneOntologyMolecularFunction	GO:0019887	protein kinase regulator activity	2.4e-05	17	91	WNK1, CDK5R1, APC, CCND1, GMFB, NRG3, CAMK2N2, YWHAG, HMGB1, PRKAR1B, PRKACA, TRIB1, PRKRIP1, PPP1R1B, TAOK1, MAPK8IP1, KIDINS220
Drug	C099555	CD 437	2.47e-05	30	196	SNRPD2, FSCN1, FKBP5, UBE2M, SLC25A5, RPS10, RPLP2, TMSB10, RPL39, RPS27, ATP5A1, ATP5O, APC2, NFKBIA, HSPA8, POU3F1, CEBPB, NR4A1, YWHAZ, HMGB1, RBX1, PFN1, COX6C, UGCG, C14orf156, JUN, ILF2, EIF4A1, EIF4B, PURB
MousePheno	MP:0002801	abnormal long term object recognition memory	2.52e-05	8	16	MAPT, SLC17A7, CAMK2A, CACNB3, CREBBP, KCNH3, EGR1, ARC
Drug	CID000114827	LY354740	2.65e-05	13	51	S100A10, FOS, CACNA2D1, GRM2, GRM3, GRM5, GRIA1, GRIA4, GRIK5, GRINA, GRIN2C, STT3B, TNPO1
MousePheno	MP:0001458	abnormal object recognition memory	2.84e-05	11	30	MAPT, SLC17A7, CAMK2A, CACNB3, GRIA4, GRIN1, CREBBP, RCAN2, KCNH3, EGR1, ARC
GeneOntologyBiologicalProcess	GO:0051129	negative regulation of cellular component organization	2.95e-05	29	213	MAP1B, MAP2, MAPT, MBP, APC, ARF6, CIT, ARHGDIA, RHOA, ARHGEF2, TMSB10, ULK1, HDAC2, RTN4, SPTBN1, GSK3B, EVL, HSPA1B, RUFY3, EIF2C2, HMGA1, HMGB1, PFN1, UBE2B, TTC3, TPR, PTEN, CLASP2, EIF4EBP2
Drug	CID000003598	hexachlorophene	3.03e-05	18	90	MOBP, ANKS1B, CCND1, CANX, CACNA1B, CACNA1A, CACNA2D1, MCHR1, GRM2, GRM3, GRM5, GRIA1, GRIA4, GRIK5, GRINA, GRIN2C, CCDC88A, RAB2A
Drug	CID000071158	acamprosate	3.03e-05	16	74	GABRA3, GABRA4, GABRA1, GABRA2, FOS, CCND1, GABRB2, GABRB3, GRM2, GRM3, GRM5, GRINA, GRIN2C, NR1D2, CRY1, NR1D1
GeneOntologyCellularComponent	GO:0043204	perikaryon	3.11e-05	12	51	PDE10A, MAP2K4, MAP1B, GOT2, BTD, PAM, KLHL24, CACNA1A, GRIK5, PI4K2A, TTLL7, SLC12A5
Interaction	HPRD:02829	High mobility group AT hook 1	3.21e-05	9	22	POU3F1, CEBPB, HMGA1, ATF2, CREBBP, CSNK2A1, CSNK2A2, JUN, HIPK2
GeneOntologyBiologicalProcess	GO:0043271	negative regulation of ion transport	3.22e-05	9	29	IL1RAPL1, RHOA, GNAQ, GNAI2, NEDD4, CNR1, PLCB4, NCS1, PTGS2
GeneOntologyBiologicalProcess	GO:0007215	glutamate signaling pathway	3.22e-05	9	29	CDK5R1, ATP1A3, GNAQ, GNAI2, GRM5, GRIA4, GRIN1, GRIN2C, HOMER1
MousePheno	MP:0003008	enhanced long term potentiation	3.23e-05	13	41	NRGN, GFAP, CAMK2A, CACNB3, HDAC2, NELL2, CNR1, TYROBP, DLG4, KCNIP3, ARHGEF9, PTPRD, ARC
MousePheno	MP:0002065	abnormal fear/anxiety-related behavior	3.36e-05	36	202	EHMT2, NPAS4, ADORA1, CPLX2, SLC2A3, FABP7, MAP6, MAP2, MAPT, S100A10, S100B, ARAF, GABRA1, FMR1, FOS, GM2A, TOM1L2, SLC17A7, CAMK2A, DLGAP3, CACNB4, CACNA1B, SLC4A10, MCHR1, GRIA1, GRIN1, SPRED1, VIM, PENK, COMT, IDS, GIT1, RASD2, NPEPPS, ARHGEF9, ARC
GeneOntologyBiologicalProcess	GO:0006913	nucleocytoplasmic transport	3.51e-05	31	237	ADAM10, AKT1, MXI1, ATXN1, RHOA, THOC2, KHSRP, HTT, NEDD4, SPTBN1, NFKBIA, GSK3B, PRICKLE1, CFL1, TGS1, G3BP2, PRKACA, XPO7, TRPS1, TPR, KPNA1, RANBP2, AAAS, RAN, JUP, PABPN1, ANP32A, JUN, UHMK1, SMG6, TNPO1
Pathway	P00040	Metabotropic glutamate receptor group II	3.72e-05	12	44	STX1B, GNG2, GNB1, GNAI2, VAMP2, CACNA1B, CACNA1A, CACNB1, GRM2, GRM3, PRKAR1B, PRKACA
GeneOntologyCellularComponent	GO:0043198	dendritic shaft	3.88e-05	9	30	ADRBK1, SLC1A2, MAP2, FMR1, ARHGEF2, CACNA1B, GRM5, GSK3B, GRIA1
GeneOntologyMolecularFunction	GO:0043566	structure-specific DNA binding	4.03e-05	25	174	ADAR, FUBP1, SSBP3, SSBP2, FOS, TCF4, TDG, TEF, ANKRD17, SP3, NFIC, NFIB, CNBP, HMGB1, CREB1, HNRPDL, SSBP4, KLF6, JUN, JUNB, RAD23B, ZBTB16, ZNF148, EGR1, PURB
GeneOntologyCellularComponent	GO:0030662	coated vesicle membrane	4.13e-05	19	115	TMED2, AP2A2, AP2A1, SLC2A3, GABRA2, SYNGR1, SEC24B, SLC17A7, VAMP2, SYT1, SYN2, SREBF2, RPH3A, EPN2, PI4K2A, ZNRF1, SYT3, SYT11, SLC30A3
Drug	CID000003226	enflurane	4.17e-05	15	68	ADORA1, GABRA3, GABRA4, GABRA1, GABRA2, FOS, GABRB2, GABRB3, CACNA2D1, NBL1, GRIA1, GRINA, GRIN2C, KCNA1, ATP2C1
MousePheno	MP:0001898	abnormal long term depression	4.29e-05	17	66	CDK5R1, FMR1, NRGN, GNAQ, GFAP, CAMK2A, GRM2, GRIA1, GRIN1, CHRM1, SPRED1, PRKAR1B, CNR1, PRKACB, PLCB4, GRIP1, ARHGEF9
Pathway	WNTPATHWAY	WNTPATHWAY	4.47e-05	9	26	APC, CCND1, GSK3B, NLK, CREBBP, CSNK2A1, CSNK1D, CSNK1A1, DVL1
Pathway	h_carm-erPathway	CARM1 and Regulation of the Estrogen Receptor	4.47e-05	9	26	MEF2C, NRIP1, CCND1, HDAC2, CARM1, MED1, POLR2A, CREBBP, GRIP1
MousePheno	MP:0000771	abnormal brain size	4.53e-05	30	158	B4GALT2, SLC2A1, SCN1A, ATXN1, CIT, ATE1, TKT, GNB1, TOP2B, HTT, HDAC2, SYN2, KIFAP3, CKMT1B, VLDLR, ATF2, ID4, KIF5C, DAG1, CACNA2D2, KCNA1, DHCR7, KIF1B, PTEN, DYRK1A, MAPK8IP3, EPB41L1, MARK2, PLCB1, PTPRS
Interaction	HPRD:02999	MAZ	4.65e-05	4	4	BPTF, MAZ, CSNK2A1, DCC
Interaction	HPRD:04199	Discs, large homolog 4	4.66e-05	21	99	LIN7A, GRASP, CIT, ATP2B2, BAI1, SIPA1L1, HTT, GRIN1, GRIK5, GRIN2C, ARHGAP32, LIN7B, KCNJ4, KCND2, KCNA1, KCNA2, DLG2, DLG4, GNG13, NLGN2, KIF1B
Pathway	cdc42_pathway	CDC42 signaling events	4.68e-05	16	74	MAP2K4, APC, WASL, ARHGDIA, BRAF, CBL, NFKBIA, GSK3B, HRAS, CFL1, MAP2K7, ATF2, ARPC4, PIK3R1, TNK2, JUN
Drug	CID000114753	DIEP	4.68e-05	9	27	MAP2K4, FOS, ATF4, CCND1, TBL1X, CREB1, ATF2, JUN, PTGS1
Interaction	HPRD:03965	Mitogen-activated protein kinase kinase kinase 3	4.69e-05	10	28	WNK1, MAP3K5, NFKBIA, HSP90AB1, YWHAG, YWHAZ, YWHAE, PRKACA, MARK2, ZBTB16
Pathway	163685	Energy Metabolism	4.75e-05	12	45	ACLY, GNG2, TKT, GNG5, GNB1, STK11, AGPAT1, PRKAR1B, PRKAA2, PRKACB, PRKACA, GNG13
Pathway	hsa05213	Endometrial cancer	4.85e-05	13	52	AKT1, APC, ARAF, CCND1, BRAF, APC2, GSK3B, GRB2, HRAS, MAP2K2, PDPK1, PIK3R1, PTEN
Interaction	HPRD:16091	Ataxin 2 binding protein 1	4.9e-05	9	23	ATXN1, ATXN2, PCBP4, KIFAP3, NUMBL, QKI, RBM9, BAT2, ATN1
Drug	CID000005092	rolipram	4.9e-05	35	253	ADCY3, FKBP5, ADORA1, ADRBK1, PDE10A, AKT1, FABP7, MBP, CIT, FOS, TOP2B, TDG, KRIT1, GRM2, GRM3, GRM5, GRIA1, GRIA4, GRIK5, GRINA, GRIN2C, CHRM1, PRKACB, PRKACA, PPP2R4, CREB1, CREBBP, PDE1A, AKAP9, PLCB4, CSNK2A2, CSNK1D, PTGS2, PTGS1, PDE7B
Interaction	HPRD:16045	Ribosomal protein L18a	4.94e-05	6	10	AES, NEDD4, RPL36, TNK2, JUN, MAP3K12
Interaction	HPRD:02409	PCTAIRE protein kinase 1	4.94e-05	6	10	CDK5R1, YWHAG, YWHAZ, YWHAE, PRKACA, CDK16
Interaction	HPRD:09018	Dual-specificity tyrosine phosphorylation regulated kinase 1A	4.94e-05	6	10	PHYHIP, YWHAG, YWHAE, CREB1, SF3B1, DYRK1A
Drug	CID000005114	ryanodine	4.98e-05	33	233	SLC8A1, FKBP5, ADRBK1, FKBP8, ATP2B2, ATP2B1, CANX, CACNA1B, CACNA1A, CACNB1, CACNA2D1, CACNA1D, KRIT1, GRM2, GRM3, GRM5, GRIA1, HBXIP, GRIA4, CHRM1, HSPA4, PRKCI, PRKACB, PRKACA, CREB1, PLCB4, KCNMA1, KCND2, RCC2, BRD4, HOMER1, CABP1, ATP2C1
Drug	CID000042113	desflurane	5.15e-05	11	40	TRAPPC9, SLC25A5, GABRA1, NBL1, GRIA1, CHKA, XDH, ATF2, KCNA1, KCNA2, ATP2C1
MousePheno	MP:0002200	abnormal brain ventricle/choroid plexus morphology	5.17e-05	37	214	B4GALT2, SMARCC1, CDK5R1, MAP1B, ATXN1, BRSK2, DCLK1, ARHGAP5, ATP1B2, GJA1, TOM1L2, GFAP, HTT, SLC4A10, NFIB, MTF2, EVL, ZEB2, ARNT2, PRKCI, CLIP2, VLDLR, ATF2, DNM1L, ID4, DCX, NUMBL, SLC9A3R1, ITGA6, DHCR7, PTEN, MYCBP2, MAPK8IP3, PRDM16, NCOR1, MAP3K12, CELSR2
GeneOntologyCellularComponent	GO:0034702	ion channel complex	5.38e-05	28	212	KCNQ5, SCN1A, GABRA3, GABRA4, GABRA1, GABRA2, GABRB2, GABRB3, CACNB4, CACNB3, CACNA1B, CACNA1A, CACNB1, CACNA2D1, CACNA1D, PPP2R4, CACNA2D2, KCNMA1, KCNQ1, KCNJ4, KCND2, KCNC1, KCNB1, KCNH1, KCNA1, KCNA2, KCNIP2, TTYH1
GeneOntologyCellularComponent	GO:0005911	cell-cell junction	5.38e-05	28	212	LIN7A, TLN2, SLC2A1, SCN1A, PANX2, APC, ARHGEF2, CADM1, BAI1, GJB2, GJA1, UBN1, MTDH, PKP4, SORBS1, PVRL3, LIN7C, KEAP1, PRKCI, LIN7B, ABI2, CXADR, ASH1L, DAG1, JUP, ITGA6, CDC42BPB, EPB41L3
Interaction	HPRD:03382	Protein kinase, cAMP dependent, catalytic, alpha	5.48e-05	27	146	ACLY, DNAJC5, ADRBK1, MAP2, MBP, APC, RHOA, FOS, ATP2B1, THOP1, CCND1, GMFB, BRAF, GFAP, STK11, SYN2, SPTBN1, GSK3B, GRIA1, GRIA4, PRKACA, VIM, PDPK1, CDK16, CUL5, SLC9A3R2, PPP1R1B
MousePheno	MP:0008219	abnormal dorsal telencephalic commissure morphology	5.5e-05	20	87	MAP2K4, CDK5R1, MAP1B, MAP2, DCLK1, ARHGAP5, GFAP, NR2F1, NFIB, KLF7, CLIP2, ABI2, NDST1, DCX, NUMBL, DCC, DHCR7, MYCBP2, MAPK8IP3, MAP3K12
GeneOntologyBiologicalProcess	GO:0043523	regulation of neuron apoptosis	5.81e-05	20	126	DNAJC5, SNCB, MAP2K4, CDK5R1, UBE2M, RHOA, BRAF, STXBP1, CACNA1A, HTT, GRM2, GRIN1, GRIK5, HRAS, MAP2K7, CRH, JUN, HIPK2, KCNIP3, AKT1S1
MousePheno	MP:0002906	increased susceptibility to pharmacologically induced seizures	5.86e-05	18	74	MT3, MT2A, SLC1A2, CDK5R1, SCN1A, GABRA1, CIT, GFAP, GRIK5, CNR1, SLC12A6, CACNA2D2, KCNA1, KCNA2, NR4A3, PTGS2, SLC12A5, PLCB1
GeneOntologyCellularComponent	GO:0030135	coated vesicle	5.9e-05	27	202	TMED2, MT3, AP2A2, AP2A1, SLC2A3, BIN1, GABRA2, SYNGR1, CADM1, SEC24B, SLC17A7, VAMP2, SYT1, SYN2, SREBF2, GRIN1, RPH3A, EPN2, RAB14, PI4K2A, TRIM9, ZNRF1, ECE1, SYT3, ATP6V1G1, SYT11, SLC30A3
MousePheno	MP:0000790	abnormal stratification in cerebral cortex	5.98e-05	10	27	CDK5R1, MAP1B, MAP2, DCLK1, TOP2B, BRAF, ID4, DCX, DAG1, ITGA6
Pathway	P00037	Ionotropic glutamate receptor	6.02e-05	12	46	SLC1A2, CAMK2A, VAMP2, CACNA1B, CACNA1A, GRM2, GRM3, GRIA1, GRIA4, GRIN1, GRIK5, GRIN2C
Drug	DB00228	Enflurane	6.85e-05	5	8	GABRA1, GRIA1, KCNMA1, KCNA1, ATP2C1
GeneOntologyBiologicalProcess	GO:0034330	cell junction organization	6.97e-05	15	80	TLN2, ACTN1, APC, GJA1, DST, SORBS1, PRKCI, PDPK1, CXADR, PLEC, NUMBL, JUP, ITGA6, NLGN2, PTEN
Interaction	122313	Affinity Capture-MS	6.98e-05	5	7	YWHAG, KIF5A, KIF5B, KIF5C, MAPK8IP3
Pathway	er_nongenomic_pathway	Plasma membrane estrogen receptor signaling	7.22e-05	11	40	AKT1, GNG2, RHOA, GNAQ, GNAZ, GNB1, GNAI2, GRB2, HRAS, PIK3R1, PLCB1
GeneOntologyCellularComponent	GO:0016580	Sin3 complex	7.3e-05	5	9	MORF4L1, HDAC2, CSNK2A1, RBBP4, ING2
MousePheno	MP:0009758	impaired behavioral response to cocaine	7.43e-05	6	10	AQP4, GRM5, GRIN1, GPRASP1, DLG4, PPP1R1B
Pathway	lkb1_pathway	LKB1 signaling events	7.57e-05	12	47	MAP2, BRSK2, STK11, GSK3B, YWHAG, YWHAZ, YWHAE, PRKAA2, PRKACA, CREB1, AKT1S1, MARK2
GeneOntologyMolecularFunction	GO:0015271	outward rectifier potassium channel activity	7.76e-05	5	9	KCNQ1, KCND2, KCNB1, KCNA2, KCNIP2
Pathway	PW:0000154	inositol phosphate metabolic	8.01e-05	8	22	SYNJ2, TESK1, PRKAA2, PLCB4, CSNK1G2, PTEN, DYRK1A, PLCB1
Pathway	AT1RPATHWAY	AT1RPATHWAY	8.23e-05	10	34	MAP2K4, MEF2A, MEF2C, GNAQ, SYT1, GRB2, HRAS, MAP2K2, ATF2, JUN
GeneOntologyBiologicalProcess	GO:0016055	Wnt receptor signaling pathway	8.81e-05	25	182	AES, LDB1, ZRANB1, APC, CCND1, APC2, STK11, TBL1X, GSK3B, ZEB2, PIAS4, NLK, CDK14, UBE2B, CSNK2A1, CSNK2A2, CSNK1D, CSNK1A1, CSNK1G2, JUP, SLC9A3R1, MACF1, DVL1, CELSR2, FBXW11
Pathway	ERK5PATHWAY	ERK5PATHWAY	9.06e-05	7	17	AKT1, MEF2A, MEF2C, GRB2, HRAS, CREB1, PIK3R1
GeneOntologyBiologicalProcess	GO:0051932	synaptic transmission, GABAergic	9.53e-05	8	26	ADORA1, NISCH, GABRB3, STXBP1, CACNB4, CACNA1A, HRAS, CNR1
Interaction	HPRD:01796	Transcription factor Sp1	9.66e-05	19	89	MEF2C, CCND1, NR2F1, OGT, HTT, HDAC2, SOX10, SP3, SREBF2, HSPA8, CEBPB, HMGA1, KLF6, CSNK2A1, RBBP4, JUN, NCOR1, ZBTB16, EGR1
MousePheno	MP:0003177	allodynia	9.89e-05	5	7	S100A10, S100B, DLG4, PTGS2, PTGS1
MousePheno	MP:0008440	abnormal subplate morphology	9.89e-05	5	7	CDK5R1, MAP1B, BRSK2, TOP2B, MAPK8IP3
GeneOntologyBiologicalProcess	GO:0016579	protein deubiquitination	9.97e-05	9	33	USP9X, TAF10, USP12, YOD1, OTUB1, OTUB2, PSMD14, USP22, MYSM1
Interaction	108636	Reconstituted Complex; Two-hybrid	0.000101081	6	11	FOS, ATF2, CREBBP, CSNK2A1, CSNK2A2, TSC22D3
Pathway	G_PROTEIN_SIGNALING	G_PROTEIN_SIGNALING	0.000101313	18	95	ADCY3, AKAP2, RHOA, GNG5, GNAQ, GNAZ, GNB1, GNA12, GNAI2, HRAS, PRKCI, PRKAR1B, PRKACB, PRKACA, PDE1A, AKAP9, GNG13, PDE7B
Drug	D008140	Lorazepam	0.000101445	4	5	GABRA3, GABRA4, GABRA1, GABRA2
Drug	DB02709	Resveratrol	0.000101445	4	5	TTR, CSNK2A1, PTGS2, PTGS1
GeneOntologyBiologicalProcess	GO:0022618	ribonucleoprotein complex assembly	0.000110154	23	163	SNRPD2, SFRS8, SFRS6, ATXN2, RPS10, SFRS2IP, CELF4, CELF2, EIF3A, PAIP1, SRPK2, HSPB1, EIF2C2, TGS1, SF1, PRPF19, PTBP2, RBM5, UHMK1, EIF4B, EIF2S3, EIF4G1, EIF4EBP2
GeneOntologyBiologicalProcess	GO:0044092	negative regulation of molecular function	0.000110899	29	229	ADCY3, WNK1, ADORA1, AES, AKT1, IL1RAPL1, RHOA, NDFIP2, EGLN1, GNAZ, GNAI2, PALM, DEPDC6, HDAC2, NFKBIA, GSK3B, HSPA1B, SPRED1, NR4A1, CNR1, ID2, CRYAB, TRIB1, PRKRIP1, NCS1, SPRED2, MAPK8IP1, DUSP7, AKT1S1
Pathway	PPARAPATHWAY	PPARAPATHWAY	0.00011097	13	56	NRIP1, CITED2, NR2F1, NFKBIA, MED1, PRKAR1B, PRKACB, CREBBP, PIK3R1, JUN, PTGS2, DUSP1, NCOR1
Pathway	MTORPATHWAY	MTORPATHWAY	0.000115301	8	23	AKT1, EIF3A, PDPK1, PIK3R1, PTEN, EIF4A1, EIF4B, EIF4G1
Drug	CID006857364	phosphatidylinositol 4-phosphate	0.000119498	29	203	ACTB, AKT1, ETV5, BIN1, IL1RAPL1, ARF5, ARF6, ARHGDIA, RHOA, NRGN, DGKZ, EPN1, DNM3, CHRM1, RAB14, PRKCI, DNM1L, PLCB4, ACTL6B, PIK3R1, DGKB, PIP5K1C, NCS1, GPAM, DNM1, EPB41L3, EPB41L1, PITPNM1, PLCB1
MousePheno	MP:0000781	decreased corpus callosum size	0.000120585	10	29	MAP2K4, CDK5R1, MAP1B, DCLK1, ARHGAP5, GFAP, CLIP2, DCX, MYCBP2, MAP3K12
Interaction	HPRD:03402	Ribosomal S6 kinase 1	0.000126055	10	31	FOS, GMFB, NFKBIA, GRB2, CEBPB, NR4A1, CREB1, CREBBP, PDPK1, NR4A3
MousePheno	MP:0002272	abnormal nervous system electrophysiology	0.000129232	36	215	ADORA1, SLC2A3, MAP1B, SCN1A, SCN1B, S100A10, FMR1, FOS, ATP2B2, GNAQ, SLC17A7, GABRB3, TEF, CACNB4, CACNA1B, CACNA1A, MCHR1, GRM5, GRIA1, GRIA4, GRIN1, CNP, PLP1, PLEC, SBF2, DAG1, CACNA2D2, KCNMA1, KCNN2, DBP, S1PR2, KCNA1, KCNA2, SLC12A5, EGR2, ARC
Pathway	MRNA_PROCESSING_REACTOME	MRNA_PROCESSING_REACTOME	0.000132897	21	123	SF3B2, SNRPN, SNRPD2, SNRNP70, SFRS12, PAPOLA, SFRS8, SFRS6, CELF4, CELF2, SRPK2, POLR2A, HNRNPU, HNRNPL, PTBP2, CPSF3, HNRNPR, RBM5, PABPN1, SF3B1, RBM39
Drug	CID000004597	ONPF	0.00013665	15	75	EPS15, AP2A2, AP2A1, WASL, REPS2, OPA1, TF, TFRC, EPN1, SYT1, DNM3, EPN2, DNM1L, NUMBL, DNM1
GeneOntologyMolecularFunction	GO:0019894	kinesin binding	0.00014064	6	15	ACTB, TRAK1, KIFAP3, MAPK8IP1, KIF1B, MAPK8IP3
GeneOntologyBiologicalProcess	GO:0030900	forebrain development	0.000148944	25	188	SMARCA4, SLC1A2, FABP7, APLP2, APLP1, DCLK1, ATRX, GNAQ, TOP2B, NR2F1, TACC1, HTT, HDAC2, NFIB, GRIN1, POU3F1, ZEB2, YWHAE, CREB1, ID4, CX3CR1, NDST1, NUMBL, MAPK8IP3, NCOR1
Interaction	HPRD:01140	Microtubule associated protein 2	0.000151819	7	16	ACTB, MAP2, GRB2, GRIN1, PRKACA, CPEB1, PLEC
Interaction	HPRD:15926	Glutamate receptor, ionotropic, N-methyl D-aspartate 1	0.000152951	13	50	MAP2, CIT, CANX, CAMK2A, SP3, GRIN1, HRAS, MAP2K2, HNRNPU, AKAP9, DLG2, DLG4, DNM1
GeneOntologyBiologicalProcess	GO:0050808	synapse organization	0.000153326	16	95	MAP1B, CADM1, ATP2B2, CACNB4, CACNA1A, DNM3, ERC2, GRIN1, SPOCK2, DNER, CACNA2D2, NRXN3, NRXN2, NRXN1, NLGN2, DVL1
GeneOntologyCellularComponent	GO:0005938	cell cortex	0.000154114	23	169	ACTB, ACTN1, ARF6, FLNB, CAP1, GM2A, NEDD4, SPTBN1, GLRX3, ARHGAP32, CFL1, MAP2K2, PRKCI, CTGF, LANCL2, SEPT3, DLG4, MACF1, CABP1, CLASP2, ARHGEF9, MARK2, LASP1
GeneOntologyMolecularFunction	GO:0003690	double-stranded DNA binding	0.000156696	18	115	FOS, TCF4, TDG, TEF, ANKRD17, SP3, NFIC, NFIB, HMGB1, CREB1, HNRPDL, KLF6, JUN, JUNB, ZBTB16, ZNF148, EGR1, PURB
MousePheno	MP:0009748	abnormal behavioral response to addictive substance	0.000156708	16	66	GRASP, AQP4, ATP1A3, GNAZ, CACNA1B, GRM5, GRIA1, GRIN1, GPRASP1, CNR1, CREB1, PENK, KCNC1, DLG4, PPP1R1B, HOMER1
MousePheno	MP:0009939	abnormal hippocampus neuron morphology	0.000156708	16	66	SLC1A2, CDK5R1, MAPT, ATP1A3, ATRX, GNAQ, HDAC2, KLF7, SLC12A6, ABI2, DCX, NR4A3, DLG4, INPP4A, PTEN, PLCB1
Interaction	HPRD:03183	14-3-3 zeta	0.000161144	23	123	AKT1, MAPT, ATXN1, MAP3K5, ARHGEF2, ATP5A1, STK25, BRAF, CBL, HSPA1B, CFL1, NR4A1, YWHAZ, YWHAE, PRKCI, VIM, CDK17, CDK16, CSNK1A1, KIF5B, EPB41L3, EPB41L1, MARK2
Pathway	h_gpcrPathway	Signaling from G-Protein Families	0.000162319	8	24	FOS, GNAQ, GNB1, HRAS, PRKAR1B, CREB1, CREBBP, JUN
Pathway	s1p_s1p2_pathway	S1P2 pathway	0.000162319	8	24	RHOA, FOS, GNAQ, GNAZ, GNA12, GNAI2, S1PR2, JUN
Interaction	HPRD:00444	cAMP response element modulator	0.000162472	8	21	GSK3B, PRKACA, CREB1, CREBBP, CSNK2A1, CSNK2A2, CSNK1A1, KCNIP3
GeneOntologyCellularComponent	GO:0044224	juxtaparanode region of axon	0.000164106	4	6	KCNAB2, KCNA1, KCNA2, EPB41L3
Interaction	HPRD:01498	Protein kinase C alpha	0.000164603	29	172	FSCN1, ADRBK1, MBP, APLP2, RHOA, ATP2B2, ATP2B1, ADAP1, NRGN, GJA1, GNA12, GMFB, PAM, GFAP, STXBP1, DGKZ, CBL, PEA15, GRM5, GRIA1, GRIA4, YWHAG, YWHAZ, HMGB1, HABP4, DLG4, DNM1, BTG2, PLCB1
Interaction	109928	Affinity Capture-Western	0.000169911	10	32	FOS, ATF4, GTF2F2, HMGA1, ATF2, CREBBP, CSNK2A1, CSNK2A2, JUN, TSC22D3
GeneOntologyBiologicalProcess	GO:0018210	peptidyl-threonine modification	0.000170307	8	28	ADRBK1, MAP2, SBK1, GALNT2, HK1, NLK, PDPK1, MAP3K12
Pathway	reg_gr_pathway	Glucocorticoid receptor regulatory network	0.000170671	16	82	SMARCC1, SMARCA4, FKBP5, AKT1, CDK5R1, FOS, PBX1, HDAC2, GSK3B, NR4A1, PRKACB, PRKACA, CREB1, CREBBP, JUN, EGR1
Drug	CID006450546	gavestinel	0.000172194	8	25	GRM2, GRM3, GRM5, GRIA1, GRIA4, GRIK5, GRINA, GRIN2C
Interaction	HPRD:04342	Kinesin family member 1C	0.000173319	5	8	YWHAG, YWHAZ, YWHAE, CSNK2A1, CSNK2A2
Interaction	HPRD:17077	GRP1 associated scaffold protein	0.000173319	5	8	GRASP, GRM2, GRM3, GRM5, DLG4
Drug	D014241	Trichloroethylene	0.000174895	16	85	NR2F6, ACVR1C, GTPBP4, NUPR1, CITED2, CCND1, RTN4, CD74, NR1D2, ID2, CSNK2A1, SLC9A3R1, ECE1, PTEN, PTMS, EGR1
Drug	CID000001650	dihydrokainate	0.000174895	16	85	SLC1A2, FOS, SLC17A7, GFAP, DGKZ, TAP1, GRM2, GRM3, GRM5, GRIA4, GRIK5, GRINA, GRIN2C, HMGB1, DGKB, DLG4
Pathway	h_HBxPathway	Calcium Signaling by HBx of Hepatitis B virus	0.000175236	5	9	GRB2, HBXIP, HRAS, CREB1, CREBBP
Pathway	h_pcafpathway	The information-processing at the IFN-beta enhancer	0.000175236	5	9	POLR2A, HMGB1, ATF2, CREBBP, JUN
Pathway	met_pathway	Signaling events activated by Hepatocyte Growth Factor Receptor (c-Met)	0.000177031	12	51	MAP2K4, AKT1, MAP3K5, FOS, CBL, GRB2, HRAS, MAP2K2, PDPK1, PIK3R1, JUN, PTEN
Pathway	SIG_INSULIN_RECEPTOR_PATHWAY_IN_CARDIAC_MYOCYTES	SIG_INSULIN_RECEPTOR_PATHWAY_IN_CARDIAC_MYOCYTES	0.000177031	12	51	AKT1, CAP1, CBL, SORBS1, GSK3B, GRB2, YWHAG, YWHAZ, YWHAE, PIK3R1, BRD4, PTEN
GeneOntologyCellularComponent	GO:0005874	microtubule	0.000178594	33	286	MAPRE2, SYNJ2, MAP1B, MAP6, MAP2, MAPT, APC, ARHGEF2, KIF1A, FAM82B, TUBB4, APC2, DNM3, TBL1X, APPBP2, MAP1LC3A, MAPRE3, CLIP2, HOOK1, KIF5A, HAUS1, KIF5B, KIF5C, KIAA0284, RCC2, DNM1, KIF1B, DVL1, CLASP2, HOOK3, VPS41, KIFC2, NCOR1
MousePheno	MP:0003216	absence seizures	0.000181864	9	25	SCN1A, ATP1A3, CELF4, GABRB3, TEF, CACNA1A, GRIA4, DBP, PTEN
Drug	CID000019212	ecdysone	0.00018342	26	178	BPTF, SMARCA4, SLC1A2, SEC14L1, ATF4, BRAF, PAM, TDG, CHMP1A, NR2F1, GTF2F2, HTT, CARM1, HSPB1, HSPA4, NR4A1, NR1D2, CPD, TXNDC17, PLEC, NR2C2, KCNC1, PABPN1, RORB, RORA, NCOR1
MousePheno	MP:0004859	abnormal synaptic plasticity	0.000190502	11	36	CPLX2, MAP6, SYNGR1, NRGN, CAMK2A, GRIA1, GRIN1, CLIP2, VLDLR, PIP5K1C, ARHGEF9
MousePheno	MP:0005404	abnormal axon morphology	0.000191491	24	124	MAP1B, MAPT, SCN1B, MBP, DCLK1, SLC17A7, DST, NR2F1, CACNA1A, POU3F1, PI4K2A, CNP, SLC12A6, UGCG, TYROBP, PLP1, PLEC, TRIM2, SBF2, DAG1, CACNA2D2, QKI, EPHA4, EGR2
Drug	D009020	Morphine	0.000193495	13	61	GNG2, MAPT, GABRA1, FOS, GNAI2, NFKBIA, GRIA1, GRIA4, GRIN2C, CREB1, PENK, PTGS2, PTGS1
Drug	CID000003454	ganciclovir	0.000195514	22	140	AKT1, FOS, TKT, GJB2, GJA1, BPHL, GRM2, GRM3, GRM5, GRINA, GRIN2C, CDK14, ABCC5, COMT, CXADR, KIF5B, PPP1R1B, HOMER1, RAB5B, EIF2S3, EGR1, SMG6
Pathway	h_mapkPathway	MAPKinase Signaling	0.000197873	16	83	MAP2K4, MEF2A, MAP3K5, ARAF, FOS, BRAF, NFKBIA, GRB2, HRAS, MAP2K2, MAP2K7, CREB1, ATF2, CREBBP, JUN, MAP3K12
GeneOntologyCellularComponent	GO:0008328	ionotropic glutamate receptor complex	0.000199322	6	16	GRIA1, GRIA4, GRIN1, GRIK5, GRIN2C, DLG4
MousePheno	MP:0009940	abnormal hippocampus pyramidal cell morphology	0.000199514	12	42	SLC1A2, CDK5R1, MAPT, ATP1A3, ATRX, HDAC2, KLF7, ABI2, DCX, NR4A3, DLG4, PTEN
GeneOntologyBiologicalProcess	GO:0010769	regulation of cell morphogenesis involved in differentiation	0.000201291	17	107	MAP1B, MAPT, MBP, CIT, ARHGDIA, RHOA, NTRK3, ULK1, SIPA1L1, CACNA1A, RTN4, GSK3B, GRIN1, RUFY3, TTC3, METRN, NUMBL
Drug	CID000004054	memantine	0.000201508	16	86	OPA1, SLC17A7, NFKBIA, GRM2, GRM3, GRM5, GSK3B, GRIA1, GRIA4, GRIN1, GRIK5, GRINA, GRIN2C, HSPA4, PPP2R4, DBN1
Drug	D003975	Diazepam	0.00020551	9	32	GABRA3, GABRA4, GABRA1, GABRA2, FOS, GABRB3, CNR1, PENK, JUN
Pathway	NDKDYNAMINPATHWAY	NDKDYNAMINPATHWAY	0.000206988	7	19	EPS15, AP2A1, SYNJ2, BIN1, EPN1, SYT1, DNM1
Pathway	h_bArrestin-srcPathway	Roles of ¬ø-arrestin-dependent Recruitment of Src Kinases in GPCR Signaling	0.000206988	7	19	ADRBK1, GNB1, HRAS, MAP2K2, KCNA1, DNM1, PLCB1
Pathway	h_pitx2Pathway	Multi-step Regulation of Transcription by Pitx2	0.000206988	7	19	ADAR, LDB1, APC, GSK3B, MED1, CREBBP, DVL1
Interaction	HPRD:10165	PREI3	0.000207517	9	27	CCDC85B, EPS15, STK11, SCMH1, UBE2V2, C1orf103, DNM1, KIDINS220, PTPRS
Pathway	h_gsk3Pathway	Inactivation of Gsk3 by AKT causes accumulation of b-catenin in Alveolar Macrophages	0.000209222	9	31	ADAR, AKT1, APC, GJA1, CCND1, GSK3B, PDPK1, PIK3R1, DVL1
MousePheno	MP:0001473	reduced long term potentiation	0.000215587	22	110	CPLX2, MAPT, ATXN1, FOS, SYNGR1, BRAF, CAMK2A, CACNA1B, GRM5, GRIA1, GRIN1, PPP1R1A, HRAS, SPRED1, PRKAR1B, PRKACB, VLDLR, CREB1, DAG1, KCNN2, EPHA4, ARC
Pathway	kitpathway	Signaling events mediated by Stem cell factor receptor (c-Kit)	0.00021559	12	52	AKT1, CBL, GSK3B, GRB2, HRAS, SPRED1, MAP2K2, CREBBP, PDPK1, PIK3R1, SPRED2, PTEN
Interaction	HPRD:05825	Cleavage and polyadenylation specificity factor 3	0.000217139	4	5	PAPOLA, POLR2A, YWHAG, CPSF3
Interaction	HPRD:05610	Histone deacetylase 4	0.000224469	11	39	MEF2A, MEF2C, ATRX, BRMS1, YWHAG, YWHAZ, YWHAE, ANKRD11, RANBP2, RBBP4, ZBTB16
MousePheno	MP:0000822	abnormal brain ventricle morphology	0.000224966	29	164	B4GALT2, SMARCC1, CDK5R1, MAP1B, ATXN1, BRSK2, DCLK1, ARHGAP5, ATP1B2, GJA1, HTT, SLC4A10, NFIB, EVL, ZEB2, ARNT2, CLIP2, VLDLR, ATF2, DNM1L, ID4, DCX, NUMBL, DHCR7, MYCBP2, MAPK8IP3, NCOR1, MAP3K12, CELSR2
GeneOntologyBiologicalProcess	GO:0043434	response to peptide hormone stimulus	0.000225675	25	193	SMARCC1, AKT1, MAP1B, ACVR1C, PHIP, BRAF, SORBS1, GRB2, PRKCI, VLDLR, IL6R, PDPK1, IGF2, UBE2B, ABCC5, NAMPT, PIK3R1, ZFP106, JUNB, NR4A3, GPAM, BTG2, EIF4EBP2, EGR2, EGR1
Drug	CID000003331	felbamate	0.000226314	14	70	GABRA3, GABRA4, GABRA1, GABRA2, GABRB2, GABRB3, GRM2, GRM3, GRM5, GRIA1, GRIA4, GRIK5, GRINA, GRIN2C
GeneOntologyBiologicalProcess	GO:0051051	negative regulation of transport	0.000227725	24	182	ADORA1, AKT1, MXI1, IL1RAPL1, ARF6, ACVR1C, RHOA, NDFIP2, GNAQ, GNAI2, NEDD4, PEA15, NFKBIA, CD74, G3BP2, CNR1, PLCB4, CRYAB, KCNQ1, NCS1, INHBA, PTGS2, PTGS1, PTEN
Pathway	p38alphabetadownstreampathway	Signaling mediated by p38-alpha and p38-beta	0.000229276	10	38	MEF2A, MEF2C, HSPB1, CEBPB, CREB1, ATF2, CSNK2A1, CSNK2A2, JUN, PTGS2
Interaction	HPRD:02092	Ribosomal protein S6 kinase alpha 3	0.000236946	8	22	MAPT, STK11, PEA15, GRIN1, NR4A1, CREB1, CREBBP, PDPK1
MousePheno	MP:0000812	abnormal dentate gyrus morphology	0.00023704	17	75	FABP7, CDK5R1, MAP1B, MAPT, CIT, DCLK1, ATRX, GJA1, GFAP, HDAC2, NFIB, KLF7, VLDLR, VIM, ABI2, DCX, PTEN
Drug	CID000002284	baclofen	0.000240737	27	191	FASTK, ADCY3, ADORA1, GABRA3, GABRA4, GABRA1, GABRA2, FOS, ATP1A3, GABRB2, GABRB3, CACNB4, CACNB3, CACNA1B, CACNA1A, CACNB1, CACNA2D1, CACNA1D, GRM2, GRM3, GRM5, GRINA, GRIN2C, CNR1, PHF21A, CACNA2D2, KCNJ4
Drug	CID000009528	flurothyl	0.000249907	11	47	GABRA4, GABRA1, GABRA2, FOS, GABRB2, SSR1, GRIN1, GRINA, GRIN2C, DLG4, SLC30A3
MousePheno	MP:0001475	reduced long term depression	0.000256502	9	26	CDK5R1, GFAP, CAMK2A, GRM2, CHRM1, PRKAR1B, CNR1, PLCB4, ARHGEF9
GeneFamily	ARF	ADP-ribosylation factors	0.000258489	3	5	ARF5, ARF6, ARF3
GeneOntologyBiologicalProcess	GO:0007213	muscarinic acetylcholine receptor signaling pathway	0.000259808	5	11	ADRBK1, CDK5R1, GNB1, GNAI2, CHRM1
GeneOntologyMolecularFunction	GO:0015457	auxiliary transport protein activity	0.000261796	13	71	WNK1, TMPRSS3, KCNAB2, HTT, NEDD4, GRM2, GRM3, NNAT, SLC9A3R2, NRXN3, NRXN2, NRXN1, KCNIP3
Drug	D017313	Fenretinide	0.000263339	31	233	MAP2K4, AKT1, CDK5R1, MAPT, MGST3, ATF4, DDIT4, TOMM40, NRIP1, CCND1, NUCKS1, CANX, NBL1, H2AFZ, RGS5, NFKBIA, GRB2, KLF7, NEAT1, HSPB1, VIM, MED16, SSBP4, CRYAB, NR2C2, RBBP4, JUN, PTGS2, PTGS1, LCN2, RAD21
MousePheno	MP:0000745	tremors	0.000263424	34	206	MAP2K4, MAP1B, SCN1A, MAPT, MBP, ARAF, GABRA1, CIT, ATP2B2, ATP1B2, OPA1, GABRB3, DST, KCNAB2, CACNA1A, HTT, POU3F1, TRAK1, PI4K2A, CNP, VLDLR, ATF2, PLP1, TRIM2, KIF5A, CACNA2D2, KCNMA1, KCNN2, KCNQ1, KCNC1, KCNA1, RORA, QKI, EGR2
Drug	D000535	Aluminum	0.000268218	12	55	ACLY, SLC2A1, MAPT, S100B, GNAQ, GFAP, TF, TFRC, XDH, HK1, PTGS2, PLCB1
Drug	CID000003281	ethchlorvynol	0.000274733	5	10	GABRA4, GABRA1, GABRA2, PTGS2, CYGB
Drug	D014191	Tranylcypromine	0.000274733	5	10	FOS, CREB1, JUN, EGR1, ARC
MousePheno	MP:0001970	abnormal pain threshold	0.000277186	28	158	ADORA1, GRASP, CDK5R1, BRSK2, S100A10, S100B, GABRA4, FMR1, KIF1A, GNAQ, GNAZ, CACNA1B, CACNA1A, NBL1, GRIA1, GRIA4, GRIK5, PRKAR1B, CNR1, PENK, PCSK2, KCND2, KCNA1, DLG4, KCNIP3, PTGS2, PTGS1, NPEPPS
GeneOntologyBiologicalProcess	GO:0033673	negative regulation of kinase activity	0.000282743	17	110	WNK1, AKT1, APC, DEPDC6, GSK3B, SPRED1, YWHAG, PDPK1, TRIB1, PRKRIP1, SPRED2, MAPK8IP1, DVL1, DUSP7, DUSP6, DUSP8, AKT1S1
GeneOntologyMolecularFunction	GO:0008066	glutamate receptor activity	0.000284098	8	30	GRM2, GRM3, GRM5, GRIA1, GRIA4, GRIN1, GRIK5, GRIN2C
Drug	D011190	Potassium Cyanide	0.00028784	4	6	FOS, PAM, NR4A1, EGR1
GeneOntologyMolecularFunction	GO:0030955	potassium ion binding	0.000288357	19	131	KCNQ5, SCN1A, ATP1A3, ATP1B2, KCNAB2, SLC12A6, KCNMA1, KCNQ1, KCNJ4, KCND2, KCNC1, KCNB1, KCNH1, KCNA1, KCNA2, KCNH3, KCNIP2, KCNIP3, SLC12A5
GeneOntologyBiologicalProcess	GO:0042391	regulation of membrane potential	0.000294234	23	174	ADORA1, SCN1A, MBP, ATXN1, GNAQ, TF, CACNB4, CACNA1A, HTT, GRIN1, GRIK5, GRIN2C, POU3F1, PEX5L, CNR1, PLP1, SBF2, KCNMA1, KCNQ1, KCND2, JUN, QKI, EGR2
Interaction	HPRD:07185	Thyroid hormone receptor alpha	0.000296635	10	34	MEF2A, CCND1, BTG1, TDG, NR2F1, HDAC2, MED1, CREB1, CREBBP, NCOR1
MousePheno	MP:0001486	abnormal startle reflex	0.000298597	21	105	DNAJC5, SLC2A3, GABRA3, GABRA1, FMR1, FOS, ATE1, ATP2B2, SLC17A7, DST, CACNA1B, TMOD2, GRIN1, GRIK5, CKMT1B, TYROBP, PLP1, S1PR2, KCNA1, DVL1, PLCB1
Interaction	HPRD:05639	14-3-3 gamma	0.000298955	37	248	PLEKHA5, WNK1, ARAF, GTPBP4, ARHGEF2, ATP5A1, TUBB4, HECTD1, BRAF, CBL, SPTBN1, BCLAF1, HSPA8, EPN2, CFL1, YWHAG, YWHAE, LUC7L2, THRAP3, CPSF3, CDK17, CDK16, DCAF7, PIK3R1, KIF5B, KIF5C, NUMBL, CRTC1, GIT1, SRRM2, RASAL2, LUC7L3, KIF1B, MYCBP2, DYRK1A, EPB41L3, AKT1S1
Pathway	h_il6Pathway	IL 6 signaling	0.000299142	7	20	FOS, GRB2, HRAS, CEBPB, IL6R, CSNK2A1, JUN
Interaction	HPRD:00679	Glucocorticoid receptor	0.000299407	18	89	SMARCC1, SMARCA4, SMARCA2, NR2F6, NRIP1, PBX1, SYT1, CEBPB, HNRNPU, PRKACA, CREB1, CREBBP, IFNGR2, JUN, GRIP1, NCOR1, ZBTB16, PTMS
Drug	CID000023991	xenon	0.00030351	16	89	MBP, FMR1, ATP2B2, ATP2B1, CACNA1A, HTT, GRM3, GRIA1, GRIA4, GRINA, GRIN2C, NR1D2, CREB1, ATN1, ATP2C1, CYGB
GeneOntologyBiologicalProcess	GO:0010721	negative regulation of cell development	0.000311302	12	63	MT3, MBP, CIT, ARHGDIA, RHOA, ULK1, RTN4, GSK3B, RUFY3, ID4, TTC3, LINGO1
Pathway	nfat_3pathway	Role of Calcineurin-dependent NFAT signaling in lymphocytes	0.00031447	12	54	FKBP8, GSK3B, YWHAG, NR4A1, YWHAZ, YWHAE, PRKACA, CREBBP, RCAN2, CSNK2A1, CSNK1A1, RAN
Drug	DB00586	Diclofenac	0.000315647	3	3	TTR, PTGS2, PTGS1
Drug	DB00154	gamma-Homolinolenic acid	0.000315647	3	3	FABP7, PTGS2, PTGS1
GeneOntologyMolecularFunction	GO:0004860	protein kinase inhibitor activity	0.000316617	9	38	WNK1, GMFB, CAMK2N2, YWHAG, PRKACA, TRIB1, PRKRIP1, PPP1R1B, MAPK8IP1
GeneOntologyBiologicalProcess	GO:0031114	regulation of microtubule depolymerization	0.000317175	6	17	MAP1B, MAP2, MAPT, APC, ARHGEF2, CLASP2
GeneOntologyCellularComponent	GO:0030427	site of polarized growth	0.000329628	14	83	CDK5R1, MAP1B, MAPT, APC, ERC2, GSK3B, TMOD2, GRIN1, RUFY3, PRKCI, TNK2, DCC, DVL1, MAP3K12
Drug	CID000003763	isoflurane	0.00034404	35	279	TRAPPC9, SCN1B, SLC25A5, APLP1, GABRA3, GABRA4, GABRA1, GABRA2, TMSB10, ATP2B2, ATP2B1, GLG1, GABRB2, GABRB3, ZZZ3, VAMP2, CACNA2D1, NBL1, HBA2, GRM2, GRM3, GRM5, GRIA1, GRIA4, GRIK5, GRINA, GRIN2C, HSPB1, CHRM1, CREBBP, IFIT3, KCNMA1, KCNA1, VASN, ATP2C1
Pathway	h_pparaPathway	Mechanism of Gene Regulation by Peroxisome Proliferators via PPARa(alpha)	0.000345012	11	47	NRIP1, CITED2, NR2F1, NFKBIA, MED1, HSPA4, PRKAR1B, CREBBP, JUN, DUSP1, NCOR1
Pathway	h_erk5Pathway	Role of Erk5 in Neuronal Survival	0.000357449	6	15	AKT1, MEF2A, GRB2, HRAS, CREB1, CREBBP
Drug	C016599	mono-(2-ethylhexyl)phthalate	0.00035768	14	73	MAP1B, FOS, NFKBIA, CTGF, CSNK1A1, JUN, JUNB, DHCR7, DUSP6, BTG2, DUSP1, ZBTB16, EGR1, CELSR2
GeneOntologyBiologicalProcess	GO:0032868	response to insulin stimulus	0.000360186	19	133	SMARCC1, AKT1, ACVR1C, PHIP, SORBS1, GRB2, PRKCI, VLDLR, PDPK1, IGF2, UBE2B, ABCC5, NAMPT, PIK3R1, ZFP106, GPAM, EIF4EBP2, EGR2, EGR1
GeneOntologyBiologicalProcess	GO:0048169	regulation of long-term neuronal synaptic plasticity	0.000368201	8	31	S100B, SYNGR1, GRM5, GRIN1, HRAS, DLG4, NPTN, EGR1
Drug	D002762	Cholecalciferol	0.000371817	26	186	ACSL4, ADARB1, SEC14L1, MGST3, GJA1, IMPAD1, CCND1, PBX1, NUCKS1, KCNAB2, SSR1, HSPA4, MAP2K2, VIM, IGF2, CTGF, BCL7C, PUM2, SF3B1, ITGA6, PTGS2, PTGS1, PTEN, DUSP6, IER2, EPHA4
Drug	CID000003925	QX-314	0.00038177	15	82	SCN1B, GABRA4, GABRA1, GABRA2, BTF3, GABRB2, PDLIM4, GRM3, GRIA1, GRIA4, GRIK5, GRINA, GRIN2C, CHRM1, ICK
Pathway	hsa04730	Long-term depression	0.000384471	14	71	ARAF, GNAQ, GNAZ, GNA12, GNAI2, BRAF, CACNA1A, GRM5, GRIA1, HRAS, MAP2K2, CRH, PLCB4, PLCB1
Pathway	hsa05211	Renal cell carcinoma	0.000384471	14	71	AKT1, SLC2A1, ARAF, EGLN1, BRAF, GRB2, HRAS, MAP2K2, ARNT2, RBX1, VEGFB, CREBBP, PIK3R1, JUN
GeneOntologyBiologicalProcess	GO:0051927	negative regulation of calcium ion transport via voltage-gated calcium channel activity	0.000386407	4	7	IL1RAPL1, RHOA, GNAI2, NCS1
MousePheno	MP:0000774	decreased brain size	0.000386859	23	122	B4GALT2, SLC2A1, SCN1A, ATXN1, CIT, TKT, GNB1, TOP2B, HTT, HDAC2, SYN2, CKMT1B, VLDLR, ATF2, ID4, KIF5C, CACNA2D2, DHCR7, KIF1B, DYRK1A, MAPK8IP3, EPB41L1, PTPRS
MousePheno	MP:0000788	abnormal cerebral cortex morphology	0.000389704	36	227	B4GALT2, CDK5R1, MAP1B, MAP2, BRSK2, DCLK1, ARHGAP5, CADM1, ATP2B2, ATRX, GNB1, GM2A, TOP2B, BRAF, NR2F1, LMO4, HTT, GRIN1, KLF7, YWHAE, KIFAP3, CNR1, VLDLR, ID4, ABI2, DCX, DAG1, NUMBL, GPR56, KCNA1, ITGA6, MYCBP2, DYRK1A, MAPK8IP3, EPHA4, MAP3K12
Pathway	CREBPATHWAY	CREBPATHWAY	0.000405187	8	27	AKT1, CAMK2A, GRB2, HRAS, PRKAR1B, PRKACB, CREB1, PIK3R1
Drug	C054649	3-(2-hydroxy-4-(1,1-dimethylheptyl)phenyl)-4-(3-hydroxypropyl)cyclohexanol	0.000409319	10	42	ACTB, AKT1, FOS, NFKBIA, CNR1, PENK, JUN, JUNB, PPP1R1B, BTG2
Drug	D011189	Potassium Chloride	0.000411955	8	28	MAPT, CNR1, CREB1, KCND2, KCNC1, NRXN3, NRXN2, SLC12A5
GeneOntologyBiologicalProcess	GO:0007416	synapse assembly	0.000416088	11	56	MAP1B, CADM1, CACNA1A, DNM3, GRIN1, SPOCK2, DNER, NRXN3, NRXN2, NRXN1, NLGN2
GeneOntologyCellularComponent	GO:0030666	endocytic vesicle membrane	0.000434667	9	40	AP2B1, AP2A2, AP2A1, CAMK2A, SYT1, GRIA1, GRIA4, EPN2, DLG4
GeneOntologyMolecularFunction	GO:0003729	mRNA binding	0.000436082	15	94	ADARB1, FMR1, CELF4, RBM25, KHSRP, PTBP2, CPSF3, HNRPDL, CPEB1, RBM5, PABPN1, HNRPLL, LUC7L3, EIF4A1, PURB
Drug	D001464	Barium	0.00043888	13	66	SLC8A1, GNG2, GNB1, CACNB4, CACNB3, CACNA1B, CACNA1A, CACNA2D1, CACNA1D, KCNQ1, KCNJ4, KCNH1, PLCB1
GeneOntologyBiologicalProcess	GO:0032880	regulation of protein localization	0.000443924	23	179	AKT1, MXI1, APC, ARHGDIA, RHOA, NDFIP2, CADM1, SORBS1, NFKBIA, NNAT, GSK3B, RAB14, DNAJC1, G3BP2, RABGAP1L, PRKCI, PRKACA, PDPK1, PIK3R1, JUP, GPAM, MYCBP2, UHMK1
GeneOntologyBiologicalProcess	GO:0032869	cellular response to insulin stimulus	0.000445698	15	94	SMARCC1, AKT1, PHIP, SORBS1, GRB2, PRKCI, VLDLR, PDPK1, IGF2, UBE2B, NAMPT, PIK3R1, ZFP106, GPAM, EIF4EBP2
Pathway	PW:0000232	phosphatidylinositol 3-kinase-Akt signaling	0.000449328	9	34	AKT1, SYNJ2, DGKZ, PDPK1, PLCB4, PIK3R1, DGKB, PTEN, PLCB1
Pathway	pi3kciaktpathway	Class I PI3K signaling events mediated by Akt	0.000449328	9	34	AKT1, MAP3K5, GSK3B, YWHAG, YWHAZ, YWHAE, PRKACA, PDPK1, KPNA1
GeneOntologyBiologicalProcess	GO:0006376	mRNA splice site selection	0.000451775	6	18	SFRS8, SFRS6, CELF4, CELF2, SF1, PTBP2
Drug	DB00159	Icosapent	0.00047544	5	11	ACSL4, SLC8A1, FABP7, PTGS2, PTGS1
MousePheno	MP:0008226	decreased anterior commissure size	0.000480645	6	13	MAP2K4, MAP1B, MAP2, DCLK1, ARHGAP5, DCX
GeneFamily	REEP	Receptor accessory proteins	0.000505495	3	6	REEP2, REEP6, REEP5
Pathway	hsa05215	Prostate cancer	0.000516901	16	90	AKT1, ARAF, ATF4, CCND1, BRAF, NFKBIA, GSK3B, GRB2, HRAS, HSP90AB1, MAP2K2, CREB1, CREBBP, PDPK1, PIK3R1, PTEN
GeneOntologyCellularComponent	GO:0030139	endocytic vesicle	0.000527343	13	77	AP2B1, AP2A2, AP2A1, ANXA11, TF, CAMK2A, SYT1, GRIA1, GRIA4, EPN2, DLG4, RAB5B, RAB5C
MousePheno	MP:0004270	analgesia	0.000547836	8	23	CDK5R1, MAP1B, KIF1A, SLC17A7, KLF7, PCSK2, DLG2, KIF1B
Pathway	GPCRPATHWAY	GPCRPATHWAY	0.000567457	9	35	FOS, GNAQ, GNB1, SYT1, HRAS, PRKAR1B, PRKACB, CREB1, JUN
MousePheno	MP:0001504	abnormal posture	0.000569091	29	173	DNAJC5, TLN2, CPLX2, MAP1B, SCN1A, ARAF, GABRA1, FLNB, ATP2B2, SLC17A7, DST, PBX1, CACNB4, CACNA1A, CACNB1, TRAK1, NR4A1, CNP, SLC12A6, CRYAB, SBF2, KIF5A, KCNN2, S1PR2, KCNA1, NR4A3, RORA, MYCBP2, SLC12A5
Pathway	P35ALZHEIMERSPATHWAY	P35ALZHEIMERSPATHWAY	0.000569944	5	11	CDK5R1, MAPT, GSK3B, CSNK1D, CSNK1A1
Pathway	GLEEVECPATHWAY	GLEEVECPATHWAY	0.000580874	7	22	MAP2K4, AKT1, FOS, GRB2, HRAS, PIK3R1, JUN
Pathway	h_crebPathway	Transcription factor CREB and its extracellular signals	0.000580874	7	22	AKT1, GRB2, HRAS, PRKAR1B, CREB1, CREBBP, PIK3R1
GeneOntologyMolecularFunction	GO:0005234	extracellular-glutamate-gated ion channel activity	0.000620079	6	19	STX1B, GRIA1, GRIA4, GRIN1, GRIK5, GRIN2C
GeneOntologyBiologicalProcess	GO:0051259	protein oligomerization	0.00063594	27	230	AKAP2, AQP4, OLFM1, GJA1, BRAF, STK11, KCNAB2, OGT, SYT1, TAF10, GRB2, HRAS, CUTA, ATL2, PRKAA2, PFKP, CRYAB, SBF2, KCNMA1, TRIM27, KCND2, KCNB1, JUP, KCNA2, NRXN1, KCNIP2, LCN2
GeneOntologyBiologicalProcess	GO:0006916	anti-apoptosis	0.000644283	29	254	AKT1, MEF2C, ARHGDIA, CITED2, GNAQ, OPA1, RPS27L, BRAF, HTT, RTN4, PEA15, NFKBIA, GSK3B, HBXIP, HSPB1, HSPA1B, CEBPB, CFL1, YWHAZ, HMGB1, PRKCI, IL6R, PIK3R1, CRYAB, MAPK8IP1, BTG2, DUSP1, TSC22D3, AKT1S1
GeneOntologyMolecularFunction	GO:0005251	delayed rectifier potassium channel activity	0.00064801	5	13	KCNQ1, KCNB1, KCNH1, KCNA1, KCNA2
GeneOntologyMolecularFunction	GO:0004879	ligand-dependent nuclear receptor activity	0.000652168	11	59	NR2F6, NR2F1, NR4A1, CUTA, NR1D2, NR2C2, RORB, NR4A3, RORA, NR1D1, RGL2
GeneOntologyBiologicalProcess	GO:0021697	cerebellar cortex formation	0.00065429	5	13	LDB1, ATP2B2, ULK1, CACNA1A, RORA
GeneOntologyBiologicalProcess	GO:0008286	insulin receptor signaling pathway	0.000663589	11	59	SMARCC1, AKT1, PHIP, SORBS1, GRB2, PDPK1, IGF2, NAMPT, PIK3R1, ZFP106, EIF4EBP2
Pathway	cxcr3pathway	CXCR3-mediated signaling events	0.000673883	10	43	AKT1, GNG2, GNAZ, GNB1, GNAI2, HRAS, MAP2K2, PDPK1, PIK3R1, DNM1
GeneOntologyCellularComponent	GO:0034708	methyltransferase complex	0.000680775	11	60	KIAA1267, ACTB, MCRS1, MLL3, OGT, HDAC2, KDM6A, C17orf49, RBBP4, MLL5, MGA
GeneOntologyBiologicalProcess	GO:0031345	negative regulation of cell projection organization	0.000708928	9	42	MBP, CIT, ARHGDIA, RHOA, ULK1, HDAC2, RTN4, GSK3B, RUFY3
GeneOntologyMolecularFunction	GO:0003714	transcription corepressor activity	0.000725328	21	163	AES, MXI1, SCAI, LDB1, NRIP1, CITED2, TCF4, IRF2BP2, HTT, TBL1X, PIAS4, SF1, ID4, JUNB, KLF12, HIPK2, RBM9, KCNIP3, ATN1, NR1D1, NCOR1
MousePheno	MP:0000878	abnormal Purkinje cell number	0.000726878	14	61	B4GALT2, LDB1, ATXN1, FMR1, ATP2B2, B4GALNT1, PI4K2A, VIM, ATF2, DNM1L, TRIM2, CACNA2D2, RORA, PTEN
Pathway	ar_tf_pathway	Regulation of Androgen receptor activity	0.000728046	11	51	ZMIZ2, EHMT2, SMARCC1, SMARCA2, MAP2K4, APPBP2, GSK3B, CREBBP, NR2C2, JUN, EGR1
GeneOntologyMolecularFunction	GO:0031434	mitogen-activated protein kinase kinase binding	0.000730288	4	8	BRAF, TRIB1, MAPK8IP1, MAPK8IP3
GeneOntologyMolecularFunction	GO:0015270	dihydropyridine-sensitive calcium channel activity	0.000730288	4	8	CACNB3, CACNB1, CACNA2D1, CACNA1D
GeneOntologyBiologicalProcess	GO:0060136	embryonic process involved in female pregnancy	0.000736155	4	8	ACSL4, CITED2, SP3, JUNB
GeneOntologyBiologicalProcess	GO:0050690	regulation of defense response to virus by virus	0.000736155	4	8	AP2B1, AP2A2, AP2A1, ATP6V1H
Pathway	TUBBYPATHWAY	TUBBYPATHWAY	0.000738796	4	7	GNAQ, GNB1, CHRM1, PLCB1
MousePheno	MP:0005316	abnormal response to tactile stimuli	0.000741203	15	68	CDK5R1, MAP1B, BRSK2, KIF1A, GNAQ, SLC17A7, DST, CACNA1B, CACNA1A, KLF7, PCSK2, KCND2, DLG2, KCNIP3, KIF1B
MousePheno	MP:0009711	abnormal conditioned place preference behavior	0.000758642	8	24	GRASP, FOS, CACNA1B, GRIA1, GRIN1, CNR1, PPP1R1B, HOMER1
GeneOntologyCellularComponent	GO:0005913	cell-cell adherens junction	0.000764492	9	43	APC, GJA1, SORBS1, PVRL3, KEAP1, ABI2, DAG1, JUP, ITGA6
Pathway	CK1PATHWAY	CK1PATHWAY	0.000781893	6	17	CDK5R1, PRKAR1B, PRKACB, CSNK1D, PPP1R1B, PLCB1
GeneOntologyCellularComponent	GO:0032281	alpha-amino-3-hydroxy-5-methyl-4-isoxazolepropionic acid selective glutamate receptor complex	0.00078276	3	4	GRIA1, GRIA4, DLG4
GeneOntologyCellularComponent	GO:0031045	dense core granule	0.00078276	3	4	ACTN1, SYT1, NCS1
MousePheno	MP:0008569	lethality at weaning	0.000794913	18	90	SCN1B, ATP1B2, BRAF, SLC17A7, GABRB3, CACNA1A, SOX10, VLDLR, ATF2, UGCG, PLP1, KIF5A, KCNC1, SLC9A3R1, RORA, INPP4A, EGR2, PLCB1
MousePheno	MP:0001902	reduced NMDA -mediated synaptic currents	0.000804235	4	6	FABP7, NRXN3, NRXN2, NRXN1
MousePheno	MP:0004994	abnormal brain wave pattern	0.000829665	11	42	SLC2A3, SCN1A, TEF, CACNB4, CACNA1A, GRIN1, CACNA2D2, DBP, S1PR2, KCNA1, KCNA2
GeneOntologyMolecularFunction	GO:0005246	calcium channel regulator activity	0.000841366	6	20	HTT, GRM2, GRM3, NRXN3, NRXN2, NRXN1
GeneFamily	CACN	Calcium channels	0.000843536	4	15	CACNA1B, CACNA1A, CACNA1D, CACNA2D2
GeneOntologyBiologicalProcess	GO:0040029	regulation of gene expression, epigenetic	0.000869172	15	100	DGCR8, SMARCA4, FOS, ATRX, HDAC2, EIF2C2, HMGA1, IGF2, UBTF, UBE2B, FTO, KCNQ1, TRIM27, MLL5, SND1
GeneOntologyMolecularFunction	GO:0048306	calcium-dependent protein binding	0.000875513	8	35	ANXA11, S100B, S100A6, MGP, SYT1, PDCD6IP, KCNIP3, CABP1
Pathway	h_p38mapkPathway	p38 MAPK Signaling	0.000880097	9	37	MAP2K4, MEF2A, MAP3K5, GRB2, HRAS, HSPB1, CREB1, ATF2, CREBBP
GeneOntologyBiologicalProcess	GO:0032412	regulation of ion transmembrane transporter activity	0.000887573	8	35	IL1RAPL1, RHOA, GNAI2, CACNB4, HK1, NCS1, SLC9A3R1, HOMER1
GeneOntologyBiologicalProcess	GO:0014070	response to organic cyclic substance	0.000896334	19	143	ADRBK1, FOS, TXN2, CCND1, TF, CACNA1B, HDAC2, GRM2, GRIN1, CNR1, PRKAA2, IGF2, COMT, JUN, JUNB, DLG4, PTGS2, PTEN, BTG2
MousePheno	MP:0001436	abnormal suckling behavior	0.000904902	20	106	SNRPN, BIN1, ARAF, FKBP8, ATRX, GJA1, GNB1, CCND1, NR2F1, OGT, SYT1, BCL11B, GRIN1, HRAS, CNTFR, PHF21A, DCC, DNM1, DHCR7, INHBA
GeneOntologyCellularComponent	GO:0005901	caveola	0.000906586	11	62	SLC8A1, ADRBK1, SLC2A1, SLC2A3, GNAQ, CBL, SORBS1, SPRED1, HK1, KCNMA1, PTGS2
MousePheno	MP:0000746	weakness	0.000911117	18	91	SNRPN, AKT1, CDK5R1, APLP2, ARAF, ARHGDIA, GNAI2, CACNA1A, TRAK1, PI4K2A, KIFAP3, CNP, PFN1, SLC12A6, PLP1, DHCR7, PTEN, EGR2
MousePheno	MP:0004169	abnormal fornicate gyrus morphology	0.000945186	5	10	MAP1B, DCLK1, GM2A, NR2F1, DCX
GeneOntologyBiologicalProcess	GO:0007623	circadian rhythm	0.000961339	12	71	NR2F6, PGLYRP1, GPRASP1, CRY1, CRH, CREB1, CSNK1D, KCNMA1, DBP, JUN, NR1D1, NCOR1
MousePheno	MP:0003107	abnormal response to novelty	0.00096492	22	122	EHMT2, PDE10A, CPLX2, MAP1B, ATXN1, FMR1, OPA1, CANX, HTT, SLC4A10, GSK3B, GRIA1, GRIA4, CNR1, CKMT1B, SLC12A6, AAAS, KCNC1, RORB, QKI, PTEN, ARHGEF9
Pathway	il6_7pathway	IL6-mediated signaling events	0.000986039	10	45	MAP2K4, AKT1, FOS, LMO4, GRB2, CEBPB, IL6R, PIK3R1, JUN, JUNB
GeneFamily	KIF	Kinesins	0.000990025	6	39	KIF1A, KIF5A, KIF5B, KIF5C, KIF1B, KIFC2
GeneFamily	DNAJ	DnaJ (Hsp40) homologs	0.000990025	6	39	DNAJC5, DNAJB14, DNAJB5, DNAJA2, DNAJC6, DNAJC1
MousePheno	MP:0003484	abnormal channel response	0.00103007	8	25	ARPP21, CACNB3, CACNA1B, CACNA1A, CACNA2D1, KCND2, KCNA2, KCNIP3
GeneOntologyBiologicalProcess	GO:0007163	establishment or maintenance of cell polarity	0.00104766	10	53	BRSK2, APC, CAP1, GSK3B, CFL1, PRKCI, MACF1, CLASP2, CDC42BPB, MARK2
Pathway	hsa04012	ErbB signaling pathway	0.00106548	15	87	MAP2K4, AKT1, ARAF, BRAF, NRG3, CAMK2A, CBL, GSK3B, GRB2, HRAS, MAP2K2, MAP2K7, SHC3, PIK3R1, JUN
Pathway	ecadherin_nascentaj_pathway	E-cadherin signaling in the nascent adherens junction	0.00108208	9	38	AKT1, ARF6, RHOA, CCND1, PIK3R1, CSNK2A1, CSNK2A2, PIP5K1C, JUP
GeneOntologyBiologicalProcess	GO:0050770	regulation of axonogenesis	0.00109192	12	72	MAP1B, MAPT, MBP, ARHGDIA, RHOA, NTRK3, ULK1, CACNA1A, RTN4, GRIN1, RUFY3, METRN
MousePheno	MP:0009750	impaired behavioral response to addictive substance	0.00109251	10	37	GRASP, AQP4, GNAZ, CACNA1B, GRM5, GRIN1, GPRASP1, CNR1, DLG4, PPP1R1B
Pathway	PW:0000674		0.00110325	6	18	STXBP1, VAMP2, CACNA1A, CACNA1D, KCNB1, RAB27A
Pathway	PW:0000313	c-Jun N-terminal kinases MAPK signaling	0.0011185	8	31	MAP2K4, MAP3K5, MAP2K7, MAPK8IP1, DUSP8, DUSP1, MAPK8IP3, MAP3K12
Pathway	lis1pathway	Lissencephaly gene (LIS1) in neuronal migration and development	0.0011185	8	31	CDK5R1, MAP1B, RHOA, PAFAH1B2, YWHAE, VLDLR, CSNK2A1, DCX
Pathway	aurora_a_pathway	Aurora A signaling	0.0011185	8	31	AKT1, TACC1, NFKBIA, GSK3B, PRKACA, CPEB1, RAN, GIT1
GeneOntologyBiologicalProcess	GO:0070838	divalent metal ion transport	0.00114771	22	180	SLC8A1, IL1RAPL1, RHOA, ATP2B2, ATP2B1, GJA1, GNAI2, CAMK2A, CACNB4, CACNB3, CACNA1B, CACNA1A, CACNB1, CACNA2D1, CACNA1D, MCHR1, GRIN1, CTGF, CACNA2D2, NCS1, PTGS2, ATP2C1
MousePheno	MP:0002757	decreased vertical activity	0.00115424	16	78	EHMT2, CPLX2, APOD, SEZ6, HTT, HDGF, GRIA4, GRIN1, GRIN2C, GPRASP1, CNR1, CKMT1B, CREB1, CREBBP, S1PR2, DLG4
GeneOntologyBiologicalProcess	GO:0034329	cell junction assembly	0.00117337	11	63	TLN2, ACTN1, APC, GJA1, DST, SORBS1, PDPK1, PLEC, JUP, ITGA6, PTEN
Pathway	endothelinpathway	Endothelins	0.0011765	12	62	ADCY3, AKT1, RHOA, FOS, GNAQ, GNAZ, GNA12, GNAI2, HRAS, MAP2K2, JUN, PLCB1
MousePheno	MP:0002733	abnormal thermal nociception	0.00118758	18	93	ADORA1, NR2F6, CDK5R1, GABRA4, FMR1, CACNA1B, CACNA1A, GRIA4, GRIK5, PRKAR1B, CNR1, PCSK2, KCND2, KCNA1, KCNIP3, PTGS2, PTGS1, NPEPPS
GeneOntologyBiologicalProcess	GO:0048489	synaptic vesicle transport	0.001199	9	45	LIN7A, CPLX2, BIN1, STXBP1, VAMP2, GRIK5, RPH3A, TRIM9, DLG4
Pathway	txa2pathway	Thromboxane A2 receptor signaling	0.00120531	11	54	ADRBK1, AKT1, GNG2, RHOA, GNAQ, GNB1, GNA12, GNAI2, PRKACA, SLC9A3R1, DNM1
GeneOntologyBiologicalProcess	GO:0050773	regulation of dendrite development	0.00131785	7	29	CIT, RHOA, SIPA1L1, GSK3B, GRIN1, NUMBL, DBN1
MousePheno	MP:0001406	abnormal gait	0.00133707	37	251	MAP2K4, CPLX2, MAP1B, SCN1A, ATXN1, MEF2C, CIT, ATP2B2, GJA1, UBE4B, CACNB4, CACNA1A, HTT, ATCAY, TRAK1, PI4K2A, CNP, VLDLR, SLC12A6, UGCG, IGF2, PLP1, IDS, PLCB4, CACNA2D2, KCNMA1, KCNN2, DCC, KCNQ1, KCNA1, RORB, RORA, QKI, NPEPPS, EPHA4, SLC12A5, EGR2
GeneOntologyMolecularFunction	GO:0031420	alkali metal ion binding	0.00134203	26	230	SLC8A1, KCNQ5, SCN1A, SCN1B, ATP1A3, ATP1B2, BPNT1, SLC17A7, KCNAB2, SLC4A10, SLC23A2, SLC12A6, KCNMA1, KCNQ1, KCNJ4, KCND2, KCNC1, KCNB1, KCNH1, KCNA1, KCNA2, KCNH3, SLC38A1, KCNIP2, KCNIP3, SLC12A5
Pathway	h_antisensePathway	RNA polymerase III transcription	0.00134739	3	4	ADAR, SFPQ, MATR3
Pathway	h_cpsfPathway	Polyadenylation of mRNA	0.00134739	3	4	PAPOLA, CPSF3, PABPN1
Pathway	PHOSPHATIDYLINOSITOL_SIGNALING_SYSTEM	PHOSPHATIDYLINOSITOL_SIGNALING_SYSTEM	0.0013544	15	89	CDS2, AKT1, STK11, DGKZ, PRKAR1B, PRKACB, PRKACA, CDK17, CDK16, PLCB4, CSNK2A1, CSNK2A2, DGKB, INPP4A, PLCB1
GeneOntologyBiologicalProcess	GO:0051170	nuclear import	0.00135798	19	148	AKT1, MXI1, RHOA, HTT, SPTBN1, NFKBIA, PRICKLE1, CFL1, TGS1, G3BP2, XPO7, TRPS1, TPR, KPNA1, RANBP2, RAN, JUP, JUN, TNPO1
Pathway	P05734	Synaptic vesicle trafficking	0.0013584	7	25	STX1B, STXBP1, VAMP2, SYT1, SYN2, SYT3, SYT11
Pathway	P04393	Ras	0.00136194	12	63	MAP2K4, AKT1, ARAF, RHOA, BRAF, GSK3B, GRB2, MAP2K2, ATF2, PDPK1, JUN, RGL2
GeneOntologyMolecularFunction	GO:0005230	extracellular ligand-gated ion channel activity	0.00137281	12	74	STX1B, GABRA3, GABRA4, GABRA1, GABRA2, GABRB2, GABRB3, GRIA1, GRIA4, GRIN1, GRIK5, GRIN2C
Pathway	s1p_s1p5_pathway	S1P5 pathway	0.00139489	4	8	RHOA, GNAZ, GNA12, GNAI2
GeneOntologyBiologicalProcess	GO:0007612	learning	0.00139744	12	74	ATXN1, FOS, ATP1A3, HTT, GRM5, GRIN1, HRAS, COMT, AAAS, JUN, DLG4, PLCB1
GeneOntologyBiologicalProcess	GO:0016458	gene silencing	0.00139744	12	74	DGCR8, ADAR, SMARCA4, CHMP1A, HDAC2, EIF2C2, SCMH1, HMGA1, UBTF, UBE2B, KCNQ1, SND1
Pathway	P00029	Huntington disease	0.00140378	18	117	AP2A2, AP2A1, MAP2K4, AKT1, WASL, ARF5, ARF6, FOS, VAT1, TUBB4, HTT, GRIN1, GRIK5, GRIN2C, CREBBP, JUN, DLG4, NCOR1
Pathway	CARM1PATHWAY	CARM1PATHWAY	0.00140897	5	13	CARM1, PRKAR1B, PRKACB, CREB1, CREBBP
GeneOntologyBiologicalProcess	GO:0021953	central nervous system neuron differentiation	0.00141271	9	46	DCLK1, GNAQ, CACNA1A, SOX5, BCL11B, LINGO1, DCX, DCC, MYCBP2
GeneOntologyBiologicalProcess	GO:0070646	protein modification by small protein removal	0.00147733	6	22	USP9X, USP12, YOD1, OTUB1, OTUB2, USP22
GeneOntologyCellularComponent	GO:0000118	histone deacetylase complex	0.00149481	9	47	MORF4L1, NRIP1, HDAC2, TBL1X, PHF21A, CSNK2A1, RBBP4, ING2, NCOR1
Pathway	smad2_3nuclearpathway	Regulation of nuclear SMAD2/3 signaling	0.00151092	14	81	AKT1, MEF2C, FOS, HDAC2, SP3, HSPA8, CEBPB, PIAS4, CREB1, ATF2, CREBBP, RBBP4, JUN, NCOR1
Pathway	NGFPATHWAY	NGFPATHWAY	0.00151691	6	19	FOS, GRB2, HRAS, PIK3R1, CSNK2A1, JUN
GeneOntologyBiologicalProcess	GO:0008344	adult locomotory behavior	0.00152922	11	65	SCN1A, ATXN1, ATP1A3, CACNB4, CACNA1A, GRM2, GRIN1, CNP, KCNMA1, HIPK2, EPHA4
GeneOntologyMolecularFunction	GO:0030374	ligand-dependent nuclear receptor transcription coactivator activity	0.00155159	8	38	ZMIZ2, MED1, HMGA1, CUTA, THRAP3, MED16, USP22, RGL2
GeneOntologyCellularComponent	GO:0031252	cell leading edge	0.00156629	22	187	TLN2, ADORA1, AKT1, SYNJ2, SLC1A2, S100B, S100A6, WASL, ARF6, CIT, TESC, EVL, CFL1, VIM, ABI2, CCDC88A, KCNB1, SLC9A3R1, MAPK8IP3, CDC42BPB, SLC12A5, WWC1
Pathway	hif1_tfpathway	HIF-1-alpha transcription factor network	0.00157089	12	64	AKT1, SLC2A1, FOS, EGLN1, CITED2, TF, TFRC, HK1, CREB1, CREBBP, ID2, JUN
GeneOntologyBiologicalProcess	GO:0010959	regulation of metal ion transport	0.0015748	12	75	SLC8A1, ADORA1, IL1RAPL1, RHOA, GJA1, GNAQ, GNAI2, CACNA2D1, MCHR1, PLCB4, NCS1, PTGS2
Pathway	ST_JNK_MAPK_PATHWAY	ST_JNK_MAPK_PATHWAY	0.00159828	9	40	MAP2K4, AKT1, MAP3K5, MAP2K7, ATF2, NR2C2, JUN, DUSP8, MAP3K12
GeneOntologyCellularComponent	GO:0005905	coated pit	0.00174508	9	48	EPS15, AP2B1, AP2A2, AP2A1, TF, TFRC, EPN1, AAK1, VLDLR
GeneOntologyCellularComponent	GO:0000790	nuclear chromatin	0.00175421	12	77	MORF4L1, SMARCC1, SMARCA4, ATRX, CITED2, HDAC2, H2AFZ, UBE2B, CSNK2A1, RBBP4, JUN, ING2
GeneOntologyCellularComponent	GO:0016604	nuclear body	0.00179514	23	201	RBM27, SFPQ, MEF2C, CPSF6, ANKS1B, TDG, RBM25, SFRS18, NEAT1, HSPA1B, TGS1, PRPF19, CREBBP, DDX3X, MLL5, SF3B1, HIPK2, SRRM2, LUC7L3, DYRK1A, TRIM8, RBM39, ZBTB16
GeneOntologyMolecularFunction	GO:0047485	protein N-terminus binding	0.00182393	14	97	MORF4L1, SMARCC1, SMARCA4, RPS21, STXBP1, GRIN2C, HSPA1B, PLEC, CSNK2A1, CSNK2A2, KIAA0892, KCNB1, SRRM2, KCNIP2
GeneOntologyCellularComponent	GO:0070695	FHF complex	0.0018708	3	5	HOOK1, FAM160A2, HOOK3
GeneOntologyMolecularFunction	GO:0017124	SH3 domain binding	0.00188632	15	108	ADAM15, SIRPA, ADAM10, EPS15, SYNJ2, MAPT, CIT, GJA1, CBL, EVL, DNAJC6, ELMO1, ABI2, ZFP106, QKI
GeneOntologyMolecularFunction	GO:0035254	glutamate receptor binding	0.00189218	5	16	CAMK2A, GSK3B, GRIN1, DLG4, HOMER1
GeneOntologyMolecularFunction	GO:0019911	structural constituent of myelin sheath	0.00194123	3	5	MBP, MOBP, PLP1
GeneOntologyCellularComponent	GO:0016327	apicolateral plasma membrane	0.00200625	15	110	LIN7A, APC, ARHGEF2, UBN1, MTDH, PKP4, NEDD4, SORBS1, PVRL3, LIN7C, PRKCI, LIN7B, CXADR, ASH1L, JUP
Pathway	h_arenrf2Pathway	Oxidative Stress Induced Gene Expression Via Nrf2	0.00203881	6	20	FOS, ATF4, KEAP1, CREB1, CREBBP, JUN
Pathway	P05730	Endogenous cannabinoid signaling	0.00203881	6	20	GNG2, GNB1, CACNA1B, CACNA1A, GRM5, CNR1
Pathway	IGF1MTORPATHWAY	IGF1MTORPATHWAY	0.00203881	6	20	AKT1, GSK3B, PDPK1, PIK3R1, PTEN, EIF2S3
Pathway	SIG_CD40PATHWAYMAP	SIG_CD40PATHWAYMAP	0.00213152	8	34	MAP2K4, SYT1, NFKBIA, MAP2K7, PIK3R1, MAPK8IP1, DUSP1, MAPK8IP3
Pathway	mapktrkpathway	Trk receptor signaling mediated by the MAPK pathway	0.00213152	8	34	CDK5R1, RUSC1, MEF2C, FOS, BRAF, HRAS, CREB1, EGR1
Pathway	hsa05220	Chronic myeloid leukemia	0.00214504	13	75	AKT1, ARAF, ACVR1C, CCND1, BRAF, HDAC2, CBL, NFKBIA, GRB2, HRAS, MAP2K2, SHC3, PIK3R1
Pathway	hsa05210	Colorectal cancer	0.00216126	14	84	AKT1, APC, ARAF, ACVR1C, FOS, CCND1, BRAF, APC2, GSK3B, GRB2, PIK3R1, DCC, JUN, DVL1
Pathway	hsa04310	Wnt signaling pathway	0.00234984	21	152	APC, RHOA, CCND1, APC2, CAMK2A, TBL1X, GSK3B, PRICKLE1, PRKACB, PRKACA, RBX1, NLK, CREBBP, PLCB4, CSNK2A1, CSNK2A2, CSNK1A1, JUN, DVL1, PLCB1, FBXW11
GeneOntologyMolecularFunction	GO:0005516	calmodulin binding	0.00236481	18	144	SLC8A1, ADCY3, MAP6, MAP2, ATP2B2, ATP2B1, NRGN, STRN3, CAMK2A, VAMP2, CACNA1A, SYT1, CAMK1D, SPTBN1, GRIN1, PDE1A, KCNN2, KCNH1
GeneOntologyMolecularFunction	GO:0003702	RNA polymerase II transcription factor activity	0.00246428	28	265	MEF2C, FOS, ATF4, BTF3, MED18, TEF, NR2F1, GTF2H4, GTF2F2, TAF10, SOX10, SOX12, SREBF2, MED1, POU3F1, CEBPB, SF1, THRAP3, CREB1, ATF2, ASH1L, DBP, RFX3, JUN, JUNB, ILF2, FOXP1, ZNF148
Pathway	75071	mRNA Processing	0.00249152	18	123	SF3B2, SNRPD2, SNRNP70, PAPOLA, ADAR, ADARB1, SFRS6, GTF2H4, GTF2F2, POLR2A, HNRNPU, HNRNPL, SF3B14, CPSF3, HNRNPR, RBM5, PABPN1, SF3B1
Pathway	PAR1PATHWAY	PAR1PATHWAY	0.00268572	6	21	RHOA, GNAQ, GNB1, GNA12, PIK3R1, PLCB1
GeneOntologyCellularComponent	GO:0016323	basolateral plasma membrane	0.00269787	28	270	LIN7A, TLN2, ACTN1, ADORA1, SLC2A1, AQP4, FLNB, CADM1, DST, TF, SLC4A10, SORBS1, AGPAT1, EVL, LIN7C, HSPA1B, KEAP1, SLC23A2, LIN7B, IL6R, SLC12A6, CXADR, PLEC, DAG1, JUP, ITGA6, GIT1, LASP1
Pathway	s1p_s1p3_pathway	S1P3 pathway	0.00277792	7	28	AKT1, RHOA, GNAQ, GNAZ, GNA12, GNAI2, S1PR2
Pathway	h_cdMacPathway	Cadmium induces DNA synthesis and proliferation in macrophages	0.00291881	5	15	FOS, NFKBIA, HRAS, JUN, PLCB1
Pathway	MYOSINPATHWAY	MYOSINPATHWAY	0.00291881	5	15	ARHGAP5, GNAQ, GNB1, GNA12, PLCB1
Pathway	hsa04150	mTOR signaling pathway	0.00312313	10	52	AKT1, DDIT4, BRAF, ULK1, STK11, PRKAA2, VEGFB, PDPK1, PIK3R1, EIF4B
GeneOntologyCellularComponent	GO:0032589	neuron projection membrane	0.00317864	5	18	ADORA1, SLC1A2, KCNB1, MAPK8IP3, SLC12A5
Pathway	h_pkcPathway	Activation of PKC through G protein coupled receptor	0.00319076	3	5	GNAQ, NFKBIA, PLCB1
Pathway	h_iresPathway	Internal Ribosome entry	0.00319076	3	5	EIF3A, EIF4A1, EIF4G1
Pathway	PYK2PATHWAY	PYK2PATHWAY	0.00344215	7	29	MAP2K4, GNAQ, SYT1, GRB2, HRAS, MAP2K2, JUN
Pathway	insulin_glucose_pathway	Insulin-mediated glucose transport	0.00344215	7	29	AKT1, VAMP2, GSK3B, YWHAG, YWHAZ, YWHAE, PRKCI
Pathway	fcer1pathway	Fc-epsilon receptor I signaling in mast cells	0.00345	12	70	MAP2K4, AKT1, FOS, SYT1, CBL, GRB2, HRAS, MAP2K2, MAP2K7, PIK3R1, JUN, DUSP1
GeneOntologyCellularComponent	GO:0045121	membrane raft	0.00347107	21	187	SLC8A1, ADCY3, ADRBK1, SLC2A1, SLC2A3, GJA1, GNAQ, GNAI2, CBL, NEDD4, SORBS1, GSK3B, EFHD2, SPRED1, PI4K2A, HK1, DAG1, KCNMA1, DCC, GRIP1, PTGS2
Pathway	NOS1PATHWAY	NOS1PATHWAY	0.00347504	6	22	SYT1, GRIN1, GRIN2C, PRKAR1B, PRKACB, DLG4
Pathway	PTDINSPATHWAY	PTDINSPATHWAY	0.00347504	6	22	GRASP, AP2A1, AKT1, GSK3B, PFKP, PDPK1
GeneOntologyCellularComponent	GO:0019897	extrinsic to plasma membrane	0.00351785	11	73	GNG2, S100A6, GNG5, GNAQ, GNAZ, GNB1, GNA12, APC2, JUP, DLG4, GNG13
Pathway	NFATPATHWAY	NFATPATHWAY	0.00361134	10	53	AKT1, MEF2C, SYT1, GSK3B, HRAS, PRKAR1B, PRKACB, CREBBP, PIK3R1, CSNK1A1
GeneOntologyCellularComponent	GO:0043209	myelin sheath	0.00410687	5	19	MBP, ATP1A3, TUBB4, RTN4, PLP1
Pathway	P05912	Dopamine receptor mediated signaling	0.00415816	10	54	GNG2, GNAZ, GNB1, GNAI2, VAMP2, GRB2, PRKACA, COMT, PPP1R1B, EPB41L3
Pathway	rac1_pathway	RAC1 signaling pathway	0.00415816	10	54	MAP2K4, ARHGAP5, ARHGDIA, CFL1, MAP2K7, ATF2, ARPC4, ABI2, PIP5K1C, JUN
Pathway	h_vdrPathway	Control of Gene Expression by Vitamin D Receptor	0.00422076	7	30	SMARCC1, SMARCA4, TOP2B, CARM1, MED1, CREBBP, NCOR1
Pathway	igf1_pathway	IGF1 pathway	0.00422076	7	30	AKT1, GRB2, HRAS, YWHAZ, YWHAE, PDPK1, PIK3R1
Pathway	RACCYCDPATHWAY	RACCYCDPATHWAY	0.00442462	6	23	AKT1, RHOA, CCND1, NFKBIA, HRAS, PIK3R1
Pathway	h_eif4Pathway	Regulation of eIF4e and p70 S6 Kinase	0.00442462	6	23	AKT1, PDPK1, PIK3R1, PTEN, EIF4A1, EIF4G1
Pathway	CCR3PATHWAY	CCR3PATHWAY	0.00442462	6	23	RHOA, GNAQ, GNB1, HRAS, CFL1, PLCB1
Pathway	ST_Phosphoinositide_3_Kinase_Pathway	ST Phosphoinositide 3 Kinase	0.00446802	8	38	AKT1, S100A9, GSK3B, GRB2, YWHAG, YWHAZ, YWHAE, PTEN
Pathway	SMOOTH_MUSCLE_CONTRACTION	SMOOTH_MUSCLE_CONTRACTION	0.0044705	20	150	SLC8A1, ADCY3, GNG2, FOS, ATF4, GJA1, GNG5, GNAQ, GNB1, DGKZ, CAMK2A, CACNB3, RGS5, PRKAR1B, PRKACB, PRKACA, CRH, ATF2, JUN, GNG13
Pathway	ST_Integrin_Signaling_Pathway	ST Integrin Signaling	0.00479555	13	82	TLN2, ACTN1, MAP2K4, AKT1, BRAF, ASAP1, GRB2, MAP2K7, TNK2, ITGA6, MAPK8IP1, PTEN, MAPK8IP3
Pathway	cmyb_pathway	C-MYB transcription factor network	0.00479555	13	82	SMARCA2, ATP2B1, CCND1, H2AFZ, HRAS, HSPA8, CEBPB, NLK, CREBBP, HIPK2, PTGS2, NCOR1, SND1
GeneOntologyCellularComponent	GO:0005769	early endosome	0.00481877	16	132	EPS15, NISCH, ARF6, PTP4A3, B2M, GJA1, CHMP1A, TF, RAB14, PI4K2A, RABGAP1L, DNER, DIAPH2, VPS41, RAB5B, RAB5C
Pathway	PW:0000543	protein kinase A (PKA) signaling	0.00511173	9	47	ADCY3, PDE10A, AKAP2, PRKAR1B, PRKACB, PRKACA, PDE1A, AKAP9, PDE7B
Pathway	nephrin_neph1_pathway	Nephrin/Neph1 signaling in the kidney podocyte	0.00512559	7	31	MAP2K4, AKT1, WASL, GRB2, PRKCI, PIK3R1, JUN
GeneOntologyCellularComponent	GO:0030141	secretory granule	0.00520713	27	270	TMED2, ACTN1, AP2A2, AP2A1, ANXA11, ATP8A1, SLC17A7, PAM, TF, STXBP1, VAMP2, SYT1, RPH3A, RAB14, PCSK1N, VEGFB, PCSK2, ZNRF1, NCS1, SPRED2, ECE1, SYT3, SYT11, RAB27A, SLC30A3, ATP2C1, ARC
GeneOntologyCellularComponent	GO:0016585	chromatin remodeling complex	0.00533485	11	77	MORF4L1, SMARCC1, SMARCA4, SMARCA2, NRIP1, TBL1X, PHF21A, ACTL6B, RSF1, NCOR1, MYSM1
Pathway	SA_PTEN_PATHWAY	SA_PTEN_PATHWAY	0.00534237	5	17	AKT1, BPNT1, IPCEF1, GRB2, PTEN
Pathway	h_PDZsPathway	Synaptic Proteins at the Synaptic Junction	0.00534237	5	17	SPTBN1, GRIN1, NRXN3, DLG2, DLG4
Pathway	nfkappabatypicalpathway	Atypical NF-kappaB pathway	0.00534237	5	17	NFKBIA, PIK3R1, CSNK2A1, CSNK2A2, FBXW11
Pathway	SA_TRKA_RECEPTOR	SA_TRKA_RECEPTOR	0.00534237	5	17	AKT1, RHOA, GRB2, HRAS, MAP2K2
Pathway	hsa05214	Glioma	0.00555248	11	65	AKT1, ARAF, CCND1, BRAF, CAMK2A, GRB2, HRAS, MAP2K2, SHC3, PIK3R1, PTEN
Pathway	SA_B_CELL_RECEPTOR_COMPLEXES	SA_B_CELL_RECEPTOR_COMPLEXES	0.00555257	6	24	FOS, GRB2, HRAS, ATF2, JUN, MAPK8IP3
Pathway	P00025	Hedgehog signaling	0.00555257	6	24	GSK3B, PRKAR1B, CREBBP, CSNK1D, CSNK1A1, FBXW11
GeneOntologyCellularComponent	GO:0005875	microtubule associated complex	0.00557628	16	134	MAP1B, MAP2, MAPT, RABGAP1, KIF1A, PEA15, APPBP2, KIFAP3, CLIP2, DCX, KIF5A, HAUS1, KIF5B, KIF5C, KIF1B, KIFC2
Pathway	hsa04540	Gap junction	0.00561436	14	93	ADCY3, GJA1, TUBB4, GNAQ, GNAI2, GRM5, GRB2, HRAS, MAP2K2, PRKACB, PRKACA, PLCB4, CSNK1D, PLCB1
GeneOntologyCellularComponent	GO:0042382	paraspeckles	0.0059869	3	7	SFPQ, CPSF6, NEAT1
Pathway	h_HuntingtonPathway	Inhibition of Huntington's disease neurodegeneration by histone deacetylase inhibitors	0.00604607	3	6	HTT, CREB1, CREBBP
Pathway	h_vitCBPathway	Vitamin C in the Brain	0.00604607	3	6	SLC2A1, SLC2A3, SLC23A2
GeneOntologyCellularComponent	GO:0005834	heterotrimeric G-protein complex	0.0061564	7	38	GNG2, GNG5, GNAQ, GNAZ, GNB1, GNA12, GNG13
Pathway	ST_ERK1_ERK2_MAPK_Pathway	ST ERK1 ERK2 MAPK	0.00616866	7	32	ARAF, BRAF, GRB2, MAP2K2, CREB1, KLF6, DUSP6
Pathway	P04378	Beta2 adrenergic receptor signaling	0.00620096	8	40	GNG2, GNB1, VAMP2, CACNB4, CACNB3, CACNB1, CACNA1D, PRKACA

## Sheet: NAc
Table S 2b: Functional Over-Representation Analysis of Genes Differentially Expressed in NAc
Analysis	ID	Name	FDR p-value	Genes in query	Genes in term	Gene Symbols
MousePheno	MP:0002207	abnormal long term potentiation	7.99e-16	49	173	RGS9, ADCY1, CPLX2, KSR1, MAPT, ATXN1, APP, GABBR1, FOS, SYNGR1, NRGN, OPRM1, GFAP, PAK3, CAMK2B, STX1A, CAMK2A, CALB2, CACNA1B, NCAM1, HDAC2, CAMKK2, NELL2, GRM5, TMOD2, NOVA2, GRIN1, PRKG1, PRKAR1B, PRKACB, VLDLR, CREB1, UBE3A, TSC2, CPEB1, NCAN, DAG1, KCNN2, KCNH3, DLG4, SYNPO, PSAP, NEUROD6, B3GAT1, EPHA4, ARHGEF9, EIF4EBP2, PTPRD, ARC
GeneOntologyCellularComponent	GO:0030425	dendrite	4.42e-15	49	262	SOD1, ADORA2A, ADRBK2, MAP2K4, CACNA1G, CPLX2, SLC1A2, CDK5R1, MAP1B, MAP2, MAX, SORT1, APP, GABBR1, ARHGEF2, CADM1, ATP2B2, OPRM1, STRN3, DLGAP3, SIPA1L1, CACNA1B, CACNA1A, DNM3, GRM3, GRM5, SREBF2, GSK3B, GRIN1, GRIK5, ARHGAP32, CHRM1, PEX5L, TSC2, CPEB1, DLGAP2, SYNE1, DBN1, KCNJ4, KCNB1, TTLL7, SYNPO, HOMER1, LRP1, DRD2, MAPK8IP3, DPYSL2, UHMK1, ARC
GeneOntologyBiologicalProcess	GO:0007409	axonogenesis	9.05e-14	48	268	ADCY1, EXT1, ALCAM, CDK5R1, MAP1B, MAPT, MBP, ANK3, SEMA5A, APP, APC, APBB2, DCLK1, BAI1, NTRK3, NR4A2, ULK1, PAFAH1B1, DST, STXBP1, CACNA1A, CNTN2, RTN4, BCL11B, GRIN1, KLF7, RUFY3, UNC5A, CNP, PRKCA, CREB1, IGF1R, METRN, DCX, KIF5C, NUMBL, DCC, LRRC4C, NRXN3, NRXN1, ISLR2, ABLIM1, DRD2, MAPK8IP3, DPYSL3, EPHA4, EGR2, CELSR3
MousePheno	MP:0009745	abnormal behavioral response to xenobiotic	3.99e-13	50	207	SLC6A11, SOD1, EHMT2, ADORA2A, MT3, CACNA1G, SLC4A3, SLC1A2, CDK5R1, SCN1A, MAPT, SCN2B, APBA1, GABRA2, GABBR1, AQP4, ATP1A3, ATP1A1, NR4A2, SEZ6, OPRK1, OPRM1, GABRB2, GABRB3, GFAP, DLGAP3, CACNB4, CACNA1B, CACNA1A, CACNA2D1, CNTN2, GRM5, GRIN1, GRIK5, GPRASP1, CREB1, CACNA2D2, KCNQ2, KCNC1, KCNA1, KCNA2, JUN, NR4A3, DLG4, HOMER2, HOMER1, DRD2, NEUROD6, SLC12A5, PLCB1
MousePheno	MP:0002062	abnormal conditioning behavior	5.75e-13	48	195	ADCY1, KSR1, MAP2, MAPT, ATXN1, APP, GABRA2, GABBR1, FOS, TIMP2, NRGN, NR4A2, OPRK1, OPRM1, GMFB, LHX8, KLF9, GFAP, PAK3, STX1A, CAMK4, CAMK2A, CACNA1B, HDAC2, GRM5, GSK3B, TMOD2, GRIN1, GRIN2C, PRKCB, PRKACB, VLDLR, PPP3R1, CREB1, UBE3A, TSC2, DCX, DBN1, KCNMA1, KCNN2, NCSTN, GIT1, HOMER2, HOMER1, DRD2, PTPN4, EIF4EBP2, ARC
MousePheno	MP:0002064	seizures	8.03e-13	59	276	SLC6A11, ADARB1, PPARGC1A, NPAS4, MT3, SGCE, CACNA1G, SLC4A3, SLC1A2, CDK5R1, SCN1A, MAPT, SCN2B, MBP, ANK3, GABBR1, ATE1, ATP1A3, ATOX1, SEZ6, B4GALNT1, GABRB3, DST, GAD2, GFAP, TEF, KCNAB2, CAMK2A, CACNB4, CACNA1A, HTT, SYN2, ATCAY, CNTN2, GRM5, SLC25A12, GRIN1, GRIK5, CNP, CREBBP, UBE3A, TYRO3, DCX, KIF5A, NUMBL, CACNA2D2, KCNQ2, KCNC1, KCNA1, KCNA2, JUN, NR4A3, QKI, PTEN, PSAP, NEUROD6, CACNG…
GeneOntologyCellularComponent	GO:0014069	postsynaptic density	1.23e-12	25	87	ADORA2A, MAP1B, DLGAP3, SHANK3, DNM3, GRM3, GRM5, GRID2, GRIN1, GRIN2C, ARHGAP32, CHRM1, LPHN1, YWHAZ, PJA2, CPEB1, DLGAP2, DLG2, DLG4, SYNPO, HOMER2, HOMER1, CABP1, DRD2, ARC
GeneOntologyCellularComponent	GO:0030424	axon	3.95e-12	41	230	SNCB, ADORA2A, ADRA2C, ADRBK2, MAP2K4, SLC1A2, ALCAM, CDK5R1, MAP1B, SCN1A, MAPT, MBP, ANK3, APP, APC, GABBR1, ATP1A3, CADM1, GABRB3, GAD2, KLHL24, KCNAB2, CACNA1B, NCAM1, HTT, CNTNAP1, CNTN2, GRM3, GRIK5, CHRM1, KCNMA1, DCC, KCNA1, KCNA2, SYNPO, SLC38A1, DRD2, MAPK8IP3, DPYSL2, UHMK1, PVALB
GeneOntologyCellularComponent	GO:0043025	cell soma	4.55e-12	45	271	SOD1, ADORA2A, PDE10A, MAP2K4, CACNA1G, CPLX2, ALCAM, CDK5R1, MAP1B, MAP2, SCN1A, MBP, SORT1, GABBR1, ARHGEF2, ATP2B2, TIMP2, GOT2, OPRM1, ULK1, PAFAH1B1, RESP18, STRN3, KLHL24, CACNA1B, CACNA1A, NCAM1, RTN4, GSK3B, GRIK5, PI4K2A, PDE1A, TSC2, KCNJ4, KCNB1, TTLL7, SYNPO, HOMER1, LRP1, DRD2, DPYSL2, RAB2A, SLC12A5, CYGB, PTPRF
MousePheno	MP:0001405	impaired coordination	2.87e-11	55	268	ABL2, DNAJC5, PPARGC1A, SGCE, MAP2K4, CPLX2, NXPH3, ATXN1, ATXN2, MID1, ATP1B2, NTRK3, BCR, NR4A2, SEZ6, CCND1, KLF9, SLC17A7, B4GALNT1, PAFAH1B1, GABRB3, DST, PBX3, CAMK2B, CAMK4, CACNB4, CALB2, CACNA1A, CCND2, HTT, SLC25A12, GRID2, GRIN1, GRIN2C, CNP, UGT8, UBE3A, SBF2, KIF5A, CACNA2D2, SYNE1, KCNMA1, KCNQ1, KCNC1, RORB, DNMT3A, RASD2, KIF1B, FXR2, PSAP, DRD2, ELAVL4, PTPN4, EGR2, CELSR3
MousePheno	MP:0001473	reduced long term potentiation	4.77e-11	32	110	RGS9, ADCY1, CPLX2, KSR1, MAPT, ATXN1, APP, GABBR1, FOS, SYNGR1, OPRM1, PAK3, STX1A, CAMK2A, CACNA1B, NCAM1, GRM5, GRIN1, PRKG1, PRKAR1B, PRKACB, VLDLR, CREB1, UBE3A, DAG1, KCNN2, SYNPO, PSAP, NEUROD6, B3GAT1, EPHA4, ARC
GeneOntologyBiologicalProcess	GO:0006836	neurotransmitter transport	8.54e-11	34	180	SLC6A11, SLC6A6, ADORA2A, AGT, CPLX2, APBA1, NISCH, GABRA2, GABBR1, SLC17A7, STXBP1, STX1A, CAMK2A, VAMP2, CACNB4, CACNA1B, CACNA1A, SYT1, ERC2, SYN2, RTN4, GRIK5, RPH3A, RAB14, YWHAZ, PRKCB, SV2C, NRXN3, NRXN2, NRXN1, EDN3, DRD2, DPYSL2, RIMS2
MousePheno	MP:0000947	convulsive seizures	1.14e-10	34	126	PPARGC1A, NPAS4, SGCE, SLC1A2, SCN1A, MBP, ANK3, GABBR1, ATE1, ATP1A3, B4GALNT1, GAD2, TEF, CACNB4, CACNA1A, HTT, SYN2, GRM5, SLC25A12, GRIN1, CNP, UBE3A, DCX, CACNA2D2, KCNQ2, KCNC1, KCNA1, KCNA2, NR4A3, QKI, PTEN, PSAP, SLC12A5, PLCB1
GeneOntologyCellularComponent	GO:0045211	postsynaptic membrane	1.39e-10	31	158	ADORA2A, GABRA2, GABBR1, GABRB2, GABRB3, GPHN, DLGAP3, SHANK3, GRM3, GRID2, GRIN1, GRIK5, GRIN2C, ARHGAP32, CHRM1, CLSTN1, PJA2, CPEB1, DLGAP2, SYNE1, KCNMA1, KCNB1, GRIP1, DLG2, DLG4, SYNPO, HOMER2, HOMER1, NLGN2, CABP1, ARC
GeneOntologyBiologicalProcess	GO:0050804	regulation of synaptic transmission	4.93e-10	33	182	ADORA2A, AGT, MAP1B, NISCH, GABBR1, SYNGR1, ATP2B2, STXBP1, STX1A, CAMK2A, SIPA1L1, CACNA1B, CACNA1A, HTT, GRM3, GRM5, GSK3B, GRIN1, GRIK5, GRIN2C, YWHAG, PRKCZ, CPEB1, CACNA2D2, DBN1, DLG4, EDN3, NLGN2, DRD2, DPYSL2, NPTN, EGR2, ARC
MousePheno	MP:0001463	abnormal spatial learning	5.23e-10	37	153	ADCY1, CPLX2, CDK5R1, MAPT, NXPH3, ATXN1, APP, FOS, ATP1A3, NRGN, SEZ6, OPRM1, LHX8, PAFAH1B1, CAMK2A, CACNA1B, NCAM1, CAMKK2, GRM5, TMOD2, GRIN1, CREB1, UBE3A, TSC2, DCX, KCNN2, NCSTN, DLG4, SYNPO, FXR2, B3GAT1, ARHGEF9, EIF4EBP2, PTPRD, PLCB1, ARC, PTPRF
Drug	CID000003007	amphetamine	5.42e-10	46	284	FASTK, ADCY3, ADCY1, SNCB, MBTPS1, ADORA2A, ADRBK2, PDE10A, SORT1, SEMA5A, FOS, GJA1, NR4A2, OPRK1, OPRM1, ZEB1, SLC17A7, GAD2, CAMK2B, CAMK1G, CAMK4, CAMK2A, CACNA1B, CACNA2D1, CAMKK2, SYN2, GRM3, GRM5, GSK3B, GRIN2C, CHRM1, HSPA4, NR4A1, PRKCZ, PRKCA, PRKCB, CRH, CREB1, PDPK1, IGF1R, DNM1L, JUN, DUSP8, DRD2, NEUROD6, PVALB
MousePheno	MP:0001468	abnormal temporal memory	5.76e-10	28	95	ADCY1, KSR1, MAP2, MAPT, APP, FOS, NRGN, LHX8, KLF9, SLC17A7, CAMK2A, HDAC2, GRM5, GSK3B, TMOD2, GRIN1, GRIN2C, PRKCB, VLDLR, CREB1, CREBBP, UBE3A, TSC2, KCNN2, NCSTN, KCNH3, GIT1, ARC
GeneOntologyBiologicalProcess	GO:0048167	regulation of synaptic plasticity	6.9e-10	21	80	ADORA2A, AGT, MAP1B, SYNGR1, ATP2B2, STXBP1, CAMK2A, SIPA1L1, HTT, GRM5, GSK3B, GRIN1, GRIN2C, YWHAG, CPEB1, DBN1, DLG4, DRD2, NPTN, EGR2, ARC
GeneOntologyBiologicalProcess	GO:0031644	regulation of neurological system process	9.2e-10	35	206	ADORA2A, AGT, MAP1B, NISCH, GABBR1, SYNGR1, ATP2B2, OPRM1, STXBP1, STX1A, CAMK2A, SIPA1L1, CACNA1B, CACNA1A, HTT, RTN4, GRM3, GRM5, GSK3B, GRIN1, GRIK5, GRIN2C, YWHAG, PRKCZ, CPEB1, CACNA2D2, DBN1, DLG4, EDN3, NLGN2, DRD2, DPYSL2, NPTN, EGR2, ARC
GeneOntologyBiologicalProcess	GO:0007269	neurotransmitter secretion	1.19e-09	23	98	ADORA2A, CPLX2, APBA1, GABBR1, STXBP1, STX1A, CAMK2A, VAMP2, CACNB4, CACNA1B, CACNA1A, SYT1, ERC2, SYN2, GRIK5, RPH3A, RAB14, YWHAZ, NRXN3, NRXN2, NRXN1, EDN3, DPYSL2
GeneOntologyCellularComponent	GO:0030659	cytoplasmic vesicle membrane	1.98e-09	38	247	ACTN1, AP2B1, AP2A2, AP2A1, SLC2A3, GABRA2, SYNGR1, ATP6V0A1, GJA1, ATP8A1, SEC24B, ULK1, SLC17A7, GAD2, AFTPH, CAMK2B, STX1A, CAMK2A, VAMP2, SYT1, SYN2, SREBF2, RPH3A, PI4K2A, SV2C, GPRC5B, AP3S2, ZNRF1, KCNQ1, ZDHHC17, DLG4, SPRED2, COPG2, KIF1B, DRD2, CACNG4, RAB27B, ECE2
MousePheno	MP:0002915	abnormal synaptic depression	2.26e-09	25	82	RGS9, CDK5R1, NRGN, GFAP, CAMK2B, CAMK4, CAMK2A, NCAM1, SYT1, SYN2, GRID2, GRIN1, CHRM1, PRKG1, PRKAR1B, PRKACB, PPP3R1, KCNMA1, GRIP1, NRXN3, NRXN2, NRXN1, DRD2, ARHGEF9, PTPN4
GeneOntologyBiologicalProcess	GO:0050767	regulation of neurogenesis	4.54e-09	38	250	SGK1, MT3, CDK5R1, MAP1B, MAPT, MBP, IL1RAPL1, NTRK3, TIMP2, ULK1, PBX1, SIPA1L1, CACNA1A, CCND2, HDAC2, RTN4, GRM5, GSK3B, GRIN1, RUFY3, YWHAG, PRPF19, ID4, METRN, NUMBL, SYNE1, DBN1, DCC, LRRC4C, DLX1, ISLR2, PTEN, ATN1, DRD2, MAPK8IP3, DPYSL2, NPTN, PTPRF
Interaction	HPRD:04199	Discs, large homolog 4	5.48e-09	26	99	MAP1A, FZD2, MAP3K10, ATP2B2, BAI1, SIPA1L1, HTT, SRC, GRIN1, GRIK5, GRIN2C, ARHGAP32, LPHN1, PRKCA, DLGAP2, KCNJ4, ZDHHC17, KCNA1, KCNA2, DLG2, DLG4, GNG13, NLGN2, LRP1, KIF1B, GDA
MousePheno	MP:0000813	abnormal hippocampus layer morphology	6.14e-09	22	68	CDK5R2, AGT, SLC1A2, CDK5R1, MAP1B, MAP2, MAPT, FUS, DCLK1, ATP1A3, ATRX, PAFAH1B1, NCAM1, HDAC2, KLF7, DCX, DAG1, NR4A3, DLG4, PTEN, PSAP, NEUROD6
GeneOntologyCellularComponent	GO:0042734	presynaptic membrane	1.53e-08	15	49	ADORA2A, SLC1A2, GAD2, CAMK2A, SYT1, ERC2, LRRC4B, GRM3, GRIK5, KCNMA1, NRXN3, NRXN2, NRXN1, NPTN, RIMS2
GeneOntologyCellularComponent	GO:0033267	axon part	1.75e-08	21	96	SNCB, ADORA2A, MAP2K4, SLC1A2, SCN1A, MBP, APC, GABBR1, GABRB3, KCNAB2, CACNA1B, CNTNAP1, CNTN2, GRIK5, CHRM1, KCNMA1, KCNA1, KCNA2, DRD2, MAPK8IP3, DPYSL2
GeneOntologyMolecularFunction	GO:0035254	glutamate receptor binding	2.61e-08	9	16	ADORA2A, CAMK2A, GSK3B, GRIN1, PLCG1, DLG4, HOMER2, HOMER1, DRD2
GeneOntologyBiologicalProcess	GO:0003001	generation of a signal involved in cell-cell signaling	3.91e-08	36	248	ACVR2B, ADORA2A, AGT, CPLX2, APBA1, ACVR1C, GABBR1, STXBP1, STX1A, CAMK2A, VAMP2, CACNB4, CACNA1B, CACNA1A, HTT, SYT1, ERC2, SYN2, RTN4, GRIK5, RPH3A, RAB14, YWHAZ, PRKCB, CRH, CREB1, CHD7, KCNQ1, NRXN3, NRXN2, NRXN1, INHBA, EDN3, DRD2, DPYSL2, RIMS2
Drug	CID000005114	ryanodine	4.54e-08	37	233	SLC8A1, ADRBK2, APP, FKBP8, ATP2B2, ATP2B1, C21orf33, GCNT2, CAMK2B, CAMK1G, CAMK4, CACNA1B, CACNA1A, CACNB1, CACNA2D1, CACNA1D, KRIT1, CAMKK2, GPI, GRM3, GRM5, CHRM1, HSPA4, PRKG1, PRKCA, PRKCB, PRKACB, PPP3R1, CREB1, KCNMA1, RCC2, BRD4, HOMER2, HOMER1, EDN3, CABP1, ATP2C1
GeneOntologyBiologicalProcess	GO:0007611	learning or memory	6.27e-08	25	138	ADCY1, SGK1, ATXN1, APP, IL1RAPL1, FOS, ATP1A3, LHX8, PAFAH1B1, HTT, GRM5, TMOD2, GRIN1, PRKCZ, PRKAR1B, PRKCA, VLDLR, CRH, AAAS, JUN, DLG4, PTEN, DRD2, EGR2, PLCB1
MousePheno	MP:0009357	abnormal seizure response to inducing agent	7.55e-08	30	130	SLC6A11, MT3, CACNA1G, SLC4A3, SLC1A2, CDK5R1, SCN1A, MAPT, SCN2B, GABBR1, ATP1A3, SEZ6, B4GALNT1, GFAP, TEF, CNTN2, GRM5, GRIN1, GRIK5, UBE3A, TYRO3, CACNA2D2, KCNQ2, KCNA1, KCNA2, JUN, NR4A3, NEUROD6, SLC12A5, PLCB1
Pathway	pi3kplctrkpathway	Trk receptor signaling mediated by PI3K and PLC-gamma	9.8e-08	13	35	CCND1, CAMK4, CAMK2A, SRC, GSK3B, GRB2, YWHAG, YWHAZ, CREB1, PDPK1, PLCG1, PIK3R1, EPB41L1
GeneOntologyBiologicalProcess	GO:0050808	synapse organization	1.01e-07	20	95	MAP1B, ANK3, APP, CADM1, ATP2B2, GPHN, CACNB4, CACNA1A, DNM3, ERC2, GRIN1, SPOCK2, PRKCA, NCAN, CACNA2D2, NRXN3, NRXN2, NRXN1, NLGN2, DRD2
MousePheno	MP:0002272	abnormal nervous system electrophysiology	1.02e-07	41	215	CACNA1G, SLC2A3, MAP1B, SCN1A, SCN2B, ANK3, GABBR1, FOS, ATP2B2, OPRM1, SLC17A7, GABRB3, GAD2, GPHN, TEF, CACNB4, CALB2, CACNA1B, CACNA1A, CNTNAP1, GRM5, GRIN1, CNP, PER1, UGT8, UBE3A, CHD7, PLEC, SBF2, DAG1, CACNA2D2, KCNMA1, KCNN2, KCNQ2, KCNA1, KCNA2, DRD2, NEUROD6, SLC12A5, EGR2, ARC
Drug	CID000001207	MK-801	1.51e-07	42	296	FSCN1, ADORA2A, PDE10A, MAP2K4, SLC1A2, MAP2, SORT1, GABRA2, FOS, OPRK1, OPRM1, GABRB2, GABRB3, GAD2, GFAP, CAMK2B, CALB2, CACNA2D1, CACNA1D, HBA2, NCAM1, GRM3, RGS20, GRM5, GRID2, GRIN1, GRIK5, GRIN2C, CHRM1, HSPA4, NGB, CREB1, PDE4B, JUN, DLG4, HOMER2, DRD2, B3GAT1, EGR2, ARC, CYGB, PVALB
GeneOntologyCellularComponent	GO:0030426	growth cone	1.72e-07	18	82	CDK5R1, MAP1B, MAPT, APC, APBB2, TIMP2, PAFAH1B1, ERC2, GSK3B, TMOD2, GRIN1, RUFY3, TSC2, DCC, DPYSL3, DPYSL2, PTPRF, GPRIN1
GeneOntologyCellularComponent	GO:0043197	dendritic spine	1.87e-07	17	74	ADRBK2, SLC1A2, CDK5R1, APP, GABBR1, DLGAP3, SIPA1L1, DNM3, GRM3, GRM5, GSK3B, GRIN1, ARHGAP32, SYNE1, SYNPO, DRD2, ARC
GeneOntologyBiologicalProcess	GO:0016358	dendrite development	1.95e-07	17	73	SGK1, MAP1B, MAP2, APP, DCLK1, SIPA1L1, CACNA1A, GSK3B, GRIN1, KLF7, PRKG1, DCX, NUMBL, SYNE1, DBN1, CELSR2, PTPRF
GeneOntologyBiologicalProcess	GO:0008344	adult locomotory behavior	1.96e-07	16	65	SCN1A, ATXN1, APP, ATP1A3, NR4A2, PAFAH1B1, PBX3, CACNB4, CACNA1A, GRIN1, CNP, CHD7, KCNMA1, HIPK2, DRD2, EPHA4
Interaction	HPRD:05639	14-3-3 gamma	1.99e-07	42	248	PLEKHA5, WNK1, GBF1, CCNY, ARHGEF2, USP8, BCR, HECTD1, SRRM1, IRS4, CBL, TRA2A, SPTBN1, SRC, PRMT1, HSPA8, HSPA1A, PNN, YWHAG, LUC7L2, PRKCA, PRKCB, THRAP3, IGF1R, CDK17, TSC2, DCAF7, PIK3R1, TAF15, KIF5B, KIF5C, NUMBL, CRTC1, PPIG, GIT1, SRRM2, RASAL2, LUC7L3, KIF1B, CYFIP2, ABLIM1, NUFIP2
GeneOntologyCellularComponent	GO:0043204	perikaryon	2.12e-07	14	51	PDE10A, MAP2K4, MAP1B, GOT2, OPRM1, RESP18, KLHL24, CACNA1A, GRIK5, PI4K2A, TTLL7, SYNPO, DRD2, SLC12A5
GeneOntologyCellularComponent	GO:0030672	synaptic vesicle membrane	2.12e-07	14	51	SLC2A3, GABRA2, SYNGR1, SLC17A7, GAD2, STX1A, VAMP2, SYT1, SYN2, RPH3A, PI4K2A, SV2C, ZNRF1, DRD2
GeneOntologyCellularComponent	GO:0030135	coated vesicle	2.17e-07	30	202	MT3, AP2A2, AP2A1, SLC2A3, SORT1, APBA1, GABRA2, GABBR1, SYNGR1, CADM1, SEC24B, SLC17A7, DOC2B, GAD2, AFTPH, STX1A, VAMP2, SYT1, SYN2, SREBF2, GRIN1, RPH3A, RAB14, PI4K2A, SV2C, IGF2R, ZNRF1, COPG2, LRP1, DRD2
Drug	CID000001727	4-aminopyridine	2.25e-07	38	258	ADORA2A, KCNQ5, GABRA2, ATP1A3, GABRB2, KCNAB2, CALB2, CACNA1B, CACNA1A, CACNA2D1, CACNA1D, SYN2, GRM3, GRM5, HSPA13, GRIK5, GRIN2C, HSPA12A, CHRM1, HSPA8, HSPA4, PRKG1, PRKCA, PRKCB, CRH, KCNMA1, KCNN2, KCNQ2, KCNQ1, KCNJ4, KCNC1, KCNB1, KCNA1, KCNA2, KCNH3, HOMER2, EPB41, PVALB
Pathway	CALCIUM_REGULATION_IN_CARDIAC_CELLS	CALCIUM_REGULATION_IN_CARDIAC_CELLS	2.52e-07	27	143	RGS9, SLC8A1, ADCY3, ADCY1, ATP2B2, ATP2B1, ATP1B2, GJA1, GNG4, CAMK2B, CAMK4, CAMK2A, CACNA1B, CACNA1A, CACNB1, CACNA1D, RGS5, PEA15, RGS20, CHRM1, PRKCZ, PRKAR1B, PRKCA, PRKCB, PRKACB, KCNB1, GNG13
GeneOntologyBiologicalProcess	GO:0048813	dendrite morphogenesis	2.53e-07	12	37	SGK1, DCLK1, SIPA1L1, CACNA1A, GSK3B, GRIN1, KLF7, DCX, NUMBL, SYNE1, CELSR2, PTPRF
GeneOntologyBiologicalProcess	GO:0031344	regulation of cell projection organization	2.56e-07	25	148	SGK1, MAP1B, MAPT, MBP, APC, IL1RAPL1, NTRK3, ULK1, SIPA1L1, CACNA1A, HDAC2, RTN4, GSK3B, GRIN1, RUFY3, METRN, NUMBL, SYNE1, DBN1, DCC, LRRC4C, ISLR2, PTEN, LCN2, PTPRF
GeneOntologyCellularComponent	GO:0008021	synaptic vesicle	2.58e-07	20	102	MT3, SLC2A3, APBA1, GABRA2, GABBR1, SYNGR1, CADM1, SLC17A7, DOC2B, GAD2, STX1A, VAMP2, SYT1, SYN2, GRIN1, RPH3A, PI4K2A, SV2C, ZNRF1, DRD2
GeneOntologyBiologicalProcess	GO:0010975	regulation of neuron projection development	2.72e-07	18	83	SGK1, MAP1B, MBP, IL1RAPL1, SIPA1L1, CACNA1A, HDAC2, RTN4, GSK3B, GRIN1, NUMBL, SYNE1, DBN1, DCC, LRRC4C, ISLR2, PTEN, PTPRF
GeneOntologyCellularComponent	GO:0019717	synaptosome	3.08e-07	22	122	SNCB, APP, GABBR1, FOS, CADM1, SLC17A7, STX1A, VAMP2, CACNA1B, ERC2, GPI, GRID2, GRIN1, GRIK5, RPH3A, MAGI2, PRKCA, DLG4, HOMER1, CYFIP2, DPYSL2, RIMS2
Drug	CID000002284	baclofen	3.39e-07	31	191	SLC6A11, FASTK, ADCY3, ADCY1, ADORA2A, SGCE, CACNA1G, GABRA2, GABBR1, FOS, ATP1A3, OPRK1, OPRM1, GABRB2, GABRB3, GAD2, GPHN, CACNB4, CACNA1B, CACNA1A, CACNB1, CACNA2D1, CACNA1D, GRM3, GRM5, GRIN2C, CACNA2D2, KCNJ4, HOMER2, DRD2, CACNG4
MousePheno	MP:0002910	abnormal excitatory postsynaptic currents	5.29e-07	22	85	RGS9, ADCY1, CPLX2, APBA1, GABBR1, SEZ6, SLC17A7, CAMK4, CAMK2A, VAMP2, CACNA1A, SYT1, GRID2, GRIN1, GRIK5, GRIN2C, CHRM1, NRXN3, NRXN2, NRXN1, DLG2, DRD2
MousePheno	MP:0001898	abnormal long term depression	5.38e-07	19	66	RGS9, CDK5R1, NRGN, GFAP, CAMK2B, CAMK4, CAMK2A, NCAM1, GRID2, GRIN1, CHRM1, PRKG1, PRKAR1B, PRKACB, PPP3R1, GRIP1, DRD2, ARHGEF9, PTPN4
GeneOntologyCellularComponent	GO:0016604	nuclear body	6.4e-07	29	201	SFPQ, MAX, MEF2C, CPSF6, NUDT21, SFRS17A, SRRM1, RBM25, ZMIZ1, SFRS18, NEAT1, HSPA1B, PNN, TGS1, PRPF19, HDAC5, CREBBP, RSRC1, HIPK3, DDX3X, MLL5, SF3B1, PPIG, CBX5, HIPK2, SRRM2, LUC7L3, RBM39, ZBTB16
MousePheno	MP:0000801	abnormal temporal lobe morphology	6.84e-07	41	230	PPARGC1A, CDK5R2, MT3, ZBTB20, AGT, SLC1A2, CDK5R1, MAP1B, MAP2, MAPT, APBB2, FUS, DCLK1, ATP1A3, CADM1, ATP2B2, ATRX, GJA1, PAFAH1B1, GFAP, NCAM1, HTT, HDAC2, NFIB, KLF7, CHRM1, VLDLR, TYRO3, ID4, DCX, DAG1, NUMBL, KCNA1, NR4A3, DLG4, KIF1B, PTEN, PSAP, MAPK8IP3, NEUROD6, PLCB1
MousePheno	MP:0001399	hyperactivity	7.25e-07	39	214	ABCA2, EHMT2, PPARGC1A, NPAS4, CACNA1G, AGT, MAP6, ATXN2, APP, GABBR1, MID1, FOS, ATE1, ATP1A3, BCR, NR4A2, OPRM1, GABRB2, GABRB3, CAMK2A, CACNA1B, HTT, CBL, TMOD2, GRIN1, CHRM1, VLDLR, PPP3R1, ATF2, CHD7, RCAN2, CACNA2D2, KCNQ1, KCNC1, NR4A3, FXR2, PSAP, PLCB1, PTPRF
GeneOntologyBiologicalProcess	GO:0030900	forebrain development	7.35e-07	28	188	SMARCA4, EXT1, SLC1A2, APP, APLP2, APLP1, DCLK1, ATRX, LHX8, PAFAH1B1, HTT, HDAC2, NFIB, SRC, GRIN1, POU3F4, POU3F1, ZEB2, PRKG1, CREB1, ID4, CX3CR1, NDST1, NUMBL, DLX1, DRD2, MAPK8IP3, NCOR1
Drug	CID000003932	linopirdine	7.74e-07	13	43	KCNQ5, ANK3, FOS, ATP2B2, ATP2B1, SLC17A7, CHRM1, KCNMA1, KCNQ2, KCNQ1, KCNC1, KCNH3, PPIG
Domain	IPR012677	a_b_plait_nuc_bd	8.05e-07	28	169	SNRNP70, SFRS12, PPARGC1A, FUS, CPSF6, NOL8, SFRS17A, RBM25, CPEB2, MSI2, CNOT4, MATR3, CPEB3, RALY, CPEB1, RCAN2, HNRNPR, TAF15, RBM9, TNRC6B, RBM39, UHMK1, ELAVL3, ELAVL1, ELAVL2, ELAVL4, EIF4B, KIAA0430
Interaction	HPRD:00698	N-methyl D-aspartate receptor subunit 2A	8.06e-07	11	26	ACTN1, CAMK2B, CAMK2A, SRC, GRIN1, ARHGAP32, PRKCA, PLCG1, DLG2, DLG4, PTPN4
GeneOntologyBiologicalProcess	GO:0048168	regulation of neuronal synaptic plasticity	8.36e-07	13	48	AGT, SYNGR1, CAMK2A, GRM5, GSK3B, GRIN1, CPEB1, DBN1, DLG4, DRD2, NPTN, EGR2, ARC
MousePheno	MP:0000950	abnormal seizure response to pharmacological agent	8.63e-07	23	94	SLC6A11, MT3, CACNA1G, SLC4A3, SLC1A2, CDK5R1, SCN1A, MAPT, SCN2B, SEZ6, GFAP, CNTN2, GRIN1, GRIK5, CACNA2D2, KCNQ2, KCNA1, KCNA2, JUN, NR4A3, NEUROD6, SLC12A5, PLCB1
Drug	CID000093460	VOLTAGE	9.91e-07	21	106	CACNA1G, KCNQ5, SCN2B, LARGE, TFRC, KCNAB2, CACNA1B, CACNA1A, CACNB1, CACNA2D1, CACNA1D, CHRM1, AKAP9, CACNA2D2, KCNQ1, KCNC1, KCNB1, KCNA1, KCNA2, KCNH3, CACNG4
MousePheno	MP:0000847	abnormal metencephalon morphology	9.95e-07	48	293	PPARGC1A, CDK5R2, MAP2K4, EXT1, CDK5R1, MAP1B, MAP2, ATXN1, ANK3, APP, IL1RAPL1, DCLK1, MID1, FKBP8, ATP2B2, ATP1B2, GJA1, BCR, SP8, CCND1, GMFB, B4GALNT1, PAFAH1B1, CAMK4, CACNA1A, NCAM1, CCND2, HTT, NFIB, GRID2, GRIN2C, PI4K2A, ZIC1, CNP, VLDLR, ATF2, UBE3A, DNM1L, TYRO3, DCX, DAG1, CACNA2D2, QKI, MAPK8IP1, PTEN, PSAP, EPB41L1, PVALB
Pathway	hsa04010	MAPK signaling pathway	1.58e-06	39	275	FGF11, MAP2K4, CACNA1G, MAPT, MAX, MEF2C, ACVR1C, FLNB, FOS, GNA12, CACNB4, CACNA1B, CACNA1A, CACNB1, CACNA2D1, CACNA1D, MAP3K7, GRB2, HSPB1, HSPA8, HSPA1A, HSPA1B, NR4A1, PRKCA, PRKCB, PRKACB, PPP3R1, NLK, ATF2, TAOK3, RASGRP1, PTPN5, CACNA2D2, JUN, TAOK1, MAPK8IP1, DUSP8, MAPK8IP3, CACNG4
Drug	D010433	Pentylenetetrazole	1.61e-06	7	12	APP, GABRA2, FOS, NR4A2, GABRB2, GAD2, NR4A1
GeneFamily	CACN	Calcium channels	1.75e-06	6	15	CACNA1G, CACNA1B, CACNA1A, CACNA1D, CACNA2D2, CACNG4
GeneOntologyBiologicalProcess	GO:0032870	cellular response to hormone stimulus	1.85e-06	25	164	ADCY3, ADCY1, SGK1, FOS, PHIP, GNG4, CCND2, SRC, GRB10, GRB2, PRKCZ, PRKAR1B, PRKCA, PRKACB, VLDLR, HDAC5, PDPK1, IGF1R, UBE2B, TSC2, PIK3R1, ZFP106, GNG13, EIF4EBP2, PTPRF
GeneOntologyBiologicalProcess	GO:0032869	cellular response to insulin stimulus	1.88e-06	18	94	SGK1, PHIP, CCND2, SRC, GRB10, GRB2, PRKCZ, PRKCA, VLDLR, HDAC5, PDPK1, IGF1R, UBE2B, TSC2, PIK3R1, ZFP106, EIF4EBP2, PTPRF
GeneOntologyCellularComponent	GO:0030662	coated vesicle membrane	1.9e-06	20	115	AP2A2, AP2A1, SLC2A3, GABRA2, SYNGR1, SEC24B, SLC17A7, GAD2, AFTPH, STX1A, VAMP2, SYT1, SYN2, SREBF2, RPH3A, PI4K2A, SV2C, ZNRF1, COPG2, DRD2
MousePheno	MP:0001393	ataxia	2.03e-06	40	231	DNAJC5, MAP2K4, MAP1B, SCN1A, MAPT, MBP, ATXN1, ANK3, APP, APBA1, APLP2, ATP2B2, KIF1A, GJA1, B4GALNT1, DST, CAMK2B, CAMK4, CACNB4, CACNA1A, ATCAY, CNTNAP1, GRID2, GRIN1, ZIC1, CNP, VLDLR, NLK, ATF2, UGT8, CACNA2D2, KCNMA1, DCC, KCNC1, KCNA1, QKI, MAPK8IP1, PTEN, PSAP, DRD2
GeneOntologyCellularComponent	GO:0034703	cation channel complex	2.37e-06	22	137	CACNA1G, KCNQ5, SCN1A, SCN2B, CACNB4, CACNA1B, CACNA1A, CACNB1, CACNA2D1, CACNA1D, CNTNAP1, CNTN2, PPP2R4, CACNA2D2, KCNMA1, KCNQ2, KCNQ1, KCNJ4, KCNC1, KCNB1, KCNA1, KCNA2
Drug	CID000002910	cyclothiazide	2.48e-06	20	103	SLC1A2, MBP, GABRA2, FOS, SLC17A7, GABRB2, GABRB3, GFAP, CACNA1A, CACNB1, CACNA2D1, GRM3, GRM5, GRID2, GRIK5, GRIN2C, NCAN, KCNMA1, JUN, HOMER2
MousePheno	MP:0009748	abnormal behavioral response to addictive substance	2.56e-06	18	66	ADORA2A, APBA1, AQP4, ATP1A3, ATP1A1, NR4A2, OPRK1, OPRM1, CACNA1B, GRM5, GRIN1, GPRASP1, CREB1, KCNC1, DLG4, HOMER2, HOMER1, DRD2
MousePheno	MP:0001406	abnormal gait	2.82e-06	42	251	MAP2K4, CPLX2, MAP1B, SCN1A, ATXN1, ANK3, MEF2C, GABBR1, LARGE, FMOD, ATP2B2, GJA1, CACNB4, CACNA1A, HTT, ATCAY, CNTNAP1, GRID2, POU3F4, PI4K2A, ZIC1, CNP, VLDLR, UGT8, IGF2R, UBE3A, IDS, CACNA2D2, KCNMA1, KCNN2, DCC, KCNQ1, KCNA1, RORB, DNMT3A, QKI, NPEPPS, PSAP, DRD2, EPHA4, SLC12A5, EGR2
Pathway	CREBPATHWAY	CREBPATHWAY	3.16e-06	10	27	ADCY1, CAMK2B, CAMK2A, GRB2, PRKAR1B, PRKCA, PRKCB, PRKACB, CREB1, PIK3R1
Pathway	PDGFPATHWAY	PDGFPATHWAY	3.16e-06	10	27	MAP2K4, FOS, GRB2, PRKCA, PRKCB, PLCG1, PIK3R1, CSNK2A1, JAK1, JUN
MousePheno	MP:0009747	impaired behavioral response to xenobiotic	3.24e-06	18	67	EHMT2, ADORA2A, CACNA1G, APBA1, GABRA2, GABBR1, AQP4, OPRK1, OPRM1, GABRB3, CACNB4, CACNA1B, CACNA2D1, GRM5, GRIN1, GPRASP1, DLG4, DRD2
MousePheno	MP:0008220	abnormal ventral commissure morphology	3.44e-06	14	43	MAP2K4, EXT1, MAP1B, MAP2, APP, DCLK1, ARHGAP5, HTT, KLF7, NDST1, DCX, MAPK8IP3, EPHA4, CELSR3
Pathway	h_PDZsPathway	Synaptic Proteins at the Synaptic Junction	3.73e-06	8	17	ANK3, NCAM1, SPTBN1, GRIN1, NRXN3, DLG2, DLG4, EPB41
Pathway	ps1pathway	Presenilin action in Notch and Wnt signaling	4.6e-06	13	47	APC, FOS, TLE1, CCND1, NEDD4, MAP3K7, GSK3B, NLK, CREBBP, CSNK2A1, CSNK1A1, NCSTN, JUN
Pathway	reelinpathway	Reelin signaling pathway	4.64e-06	10	28	CDK5R1, MAP1B, MAPT, ARHGEF2, PAFAH1B1, CBL, GSK3B, RAPGEF1, VLDLR, PIK3R1
Pathway	AT1RPATHWAY	AT1RPATHWAY	4.68e-06	11	34	MAP2K4, AGT, MEF2A, MEF2C, SYT1, SRC, GRB2, PRKCA, PRKCB, ATF2, JUN
MousePheno	MP:0001488	increased startle reflex	4.69e-06	12	33	ABCA2, PPARGC1A, ADRA2C, SLC2A3, NXPH3, MID1, ATE1, SLC17A7, PBX3, GRIN1, GRIK5, KCNA1
GeneOntologyMolecularFunction	GO:0022843	voltage-gated cation channel activity	4.71e-06	23	151	CACNA1G, KCNQ5, SCN1A, SCN2B, KCNAB2, CACNB4, CACNA1B, CACNA1A, CACNB1, CACNA2D1, CACNA1D, GRIN1, CACNA2D2, KCNMA1, KCNQ2, KCNQ1, KCNJ4, KCNC1, KCNB1, KCNA1, KCNA2, KCNH3, CACNG4
GeneFamily	KCN	Potassium channels	4.87e-06	12	88	KCNQ5, KCNAB2, KCNMA1, KCNN2, KCNQ2, KCNQ1, KCNJ4, KCNC1, KCNB1, KCNA1, KCNA2, KCNH3
GeneOntologyBiologicalProcess	GO:0042391	regulation of membrane potential	5.49e-06	25	174	SOD1, ADORA2A, CACNA1G, SCN1A, MBP, ATXN1, OPRM1, CACNB4, CACNA1A, HTT, CNTNAP1, GRID2, GRIN1, GRIK5, GRIN2C, POU3F1, PEX5L, PRKCZ, UGT8, SBF2, KCNMA1, KCNQ1, JUN, QKI, EGR2
GeneOntologyBiologicalProcess	GO:0007416	synapse assembly	5.52e-06	13	56	MAP1B, APP, CADM1, CACNA1A, DNM3, GRIN1, SPOCK2, PRKCA, NRXN3, NRXN2, NRXN1, NLGN2, DRD2
GeneOntologyBiologicalProcess	GO:0031111	negative regulation of microtubule polymerization or depolymerization	6.72e-06	8	21	SGK1, MAP1B, MAP1A, MAP2, MAPT, APC, MID1, ARHGEF2
GeneOntologyMolecularFunction	GO:0005516	calmodulin binding	7.16e-06	22	144	SLC8A1, ADCY3, ADCY1, MAP6, MAP2, ATP2B2, ATP2B1, NRGN, STRN3, CAMK2B, CAMK1G, CAMK4, CAMK2A, VAMP2, CACNA1A, SYT1, CAMKK2, SPTBN1, GRIN1, PPP3R1, PDE1A, KCNN2
GeneOntologyBiologicalProcess	GO:0007270	nerve-nerve synaptic transmission	7.68e-06	15	75	ADORA2A, NISCH, GABRB3, STXBP1, CAMK4, CACNB4, CACNA1A, GRM3, TMOD2, GRID2, GRIN1, GRIK5, DLGAP2, KIF1B, DRD2
Drug	CID000020140	valnoctamide	7.71e-06	10	31	FSCN1, KCNQ5, FMOD, POU3F1, PER1, KCNQ2, KCNQ1, PPIG, DIAPH2, EGR2
GeneOntologyCellularComponent	GO:0034704	calcium channel complex	7.72e-06	9	28	CACNA1G, CACNB4, CACNA1B, CACNA1A, CACNB1, CACNA2D1, CACNA1D, PPP2R4, CACNA2D2
Drug	CID000005917	pentylenetetrazol	8.45e-06	22	130	NPAS4, ADORA2A, MAP1B, GABRA2, FOS, GOT2, ZEB1, GABRB2, GABRB3, GAD2, GFAP, CACNA2D1, SYN2, GRM3, GRM5, GRIN2C, CREB1, IDS, KCNN2, KCNA1, JUN, EGR2
Drug	CID006436102	panfuran	8.51e-06	28	190	ABCA2, KIAA1267, SNRNP70, SOD1, SNCB, TUBB2B, MAP2, MAPT, APP, APBB2, PGLYRP1, APLP1, ATP6V0A1, GFAP, LMO4, SYN2, GSK3B, CNBP, ZIC1, PPP2R4, CX3CR1, ATP6V0A2, LRP1, NPEPPS, DPYSL2, LCN2, PLCB1, ARC
MousePheno	MP:0001402	hypoactivity	8.67e-06	42	262	DNAJC5, EHMT2, ADORA2A, PDE10A, CACNA1G, ANK3, APP, GABBR1, ATOX1, KIF1A, NR4A2, SEZ6, OPRM1, GCNT2, CAMK4, CACNB4, CACNA1A, HTT, CNTNAP1, GRID2, GRIN1, ZIC1, CNP, CRY1, CREBBP, UGT8, IGF1R, UBE3A, ID4, IDS, FTO, AAAS, ARID4A, DNMT3A, DLG4, SYNPO, QKI, RASD2, PTEN, PSAP, DRD2, EGR2
MousePheno	MP:0002557	abnormal social/conspecific interaction	8.84e-06	39	236	ADORA2A, PDE10A, MAP6, MAPT, APC, FOS, OPRM1, CCND1, GABRB3, GAD2, NIPAL3, CACNA1B, CACNA1A, IRS4, HTT, KHDRBS1, SRC, NMBR, GSK3B, GRID2, GRIN1, LPHN1, PPP3R1, PEG3, IGF2R, IGF1R, CHD7, CUX1, NUMBL, CACNA2D2, KCNN2, KCNA1, RORB, EDN3, NLGN2, NPEPPS, EPHA4, PTPRF, RIMS2
Pathway	PGC1APATHWAY	PGC1APATHWAY	8.86e-06	9	24	PPARGC1A, MEF2A, MEF2C, CAMK2B, CAMK1G, CAMK4, CAMK2A, SYT1, HDAC5
MousePheno	MP:0002912	abnormal excitatory postsynaptic potential	9.05e-06	17	65	ADCY1, ATXN1, NRGN, SEZ6, OPRM1, SLC17A7, GFAP, STX1A, CAMK2A, DLGAP3, CACNA1B, CACNA1A, GRM5, CHRM1, KCNN2, DLG2, ARHGEF9
Pathway	CACAMPATHWAY	CACAMPATHWAY	9.46e-06	7	14	CAMK2B, CAMK1G, CAMK4, CAMK2A, SYT1, CAMKK2, CREB1
GeneOntologyBiologicalProcess	GO:0051402	neuron apoptosis	9.86e-06	21	136	DNAJC5, SOD1, SNCB, ADORA2A, MAP2K4, AGT, CDK5R1, APP, NR4A2, STXBP1, CACNA1A, HTT, GPI, GRID2, GRIN1, GRIK5, CRH, JUN, DLX1, HIPK2, PTPRF
GeneOntologyBiologicalProcess	GO:0008286	insulin receptor signaling pathway	1.02e-05	13	59	PHIP, SRC, GRB10, GRB2, PRKCZ, PRKCA, PDPK1, IGF1R, TSC2, PIK3R1, ZFP106, EIF4EBP2, PTPRF
MousePheno	MP:0001525	impaired balance	1.05e-05	34	195	ABCA2, SGCE, MAP6, SCN1A, MAPT, APP, APLP2, ATP2B2, KIF1A, BCR, GMFB, GABRB3, DST, CACNB4, CACNA1A, HTT, CNTNAP1, GRID2, GRIN2C, POU3F4, CNP, VLDLR, ATF2, CHD7, NUMBL, KCNMA1, KCNQ1, KCNC1, KCNA1, NR4A3, PTEN, PSAP, DRD2, RAD23B
MousePheno	MP:0003997	tonic-clonic seizures	1.08e-05	15	53	SCN1A, GABBR1, ATE1, B4GALNT1, GAD2, TEF, HTT, GRIN1, UBE3A, DCX, KCNQ2, KCNA1, NR4A3, PTEN, SLC12A5
GeneOntologyBiologicalProcess	GO:0051899	membrane depolarization	1.09e-05	12	51	ADORA2A, CACNA1G, ATXN1, OPRM1, CACNA1A, GRID2, GRIN1, GRIK5, GRIN2C, PRKCZ, KCNQ1, JUN
Pathway	h_dreampathway	Repression of Pain Sensation by the Transcriptional Regulator DREAM	1.09e-05	6	10	FOS, OPRK1, PRKAR1B, CREB1, CREBBP, JUN
MousePheno	MP:0003216	absence seizures	1.11e-05	10	25	CACNA1G, SCN1A, GABBR1, ATP1A3, GABRB3, TEF, CACNA1A, UBE3A, PTEN, CACNG4
Interaction	116538	Two-hybrid	1.15e-05	5	6	NRXN3, NRXN2, NRXN1, DLG2, DLG4
Interaction	HPRD:05687	Phosphoinositide 3 kinase enhancer	1.15e-05	5	6	PLCG1, PIK3R1, HOMER2, HOMER1, EPB41L1
GeneOntologyBiologicalProcess	GO:0007215	glutamate signaling pathway	1.23e-05	9	29	CDK5R1, APP, ATP1A3, GRM5, GRID2, GRIN1, GRIN2C, HOMER2, HOMER1
GeneOntologyBiologicalProcess	GO:0010769	regulation of cell morphogenesis involved in differentiation	1.26e-05	18	107	SGK1, MAP1B, MAPT, MBP, NTRK3, ULK1, SIPA1L1, CACNA1A, RTN4, GSK3B, GRIN1, RUFY3, METRN, NUMBL, SYNE1, LRRC4C, ISLR2, PTPRF
Domain	IPR006548	ELAD_HUD_SF	1.27e-05	4	4	ELAVL3, ELAVL1, ELAVL2, ELAVL4
Interaction	HPRD:05610	Histone deacetylase 4	1.29e-05	12	39	MEF2A, MEF2C, ATRX, BCL6, CAMK4, YWHAG, YWHAZ, ANKRD11, RANBP2, RBBP4, CBX5, ZBTB16
Pathway	h_mTORPathway	mTOR Signaling	1.31e-05	9	25	EIF3A, PDPK1, CUX1, TSC2, PIK3R1, PTEN, EIF4A1, EIF4B, EIF4G1
GeneOntologyBiologicalProcess	GO:0008088	axon cargo transport	1.41e-05	7	17	APP, APBA1, KIF1A, PAFAH1B1, DST, HTT, KIF1B
MousePheno	MP:0009940	abnormal hippocampus pyramidal cell morphology	1.44e-05	13	42	SLC1A2, CDK5R1, MAPT, FUS, ATP1A3, ATRX, PAFAH1B1, HDAC2, KLF7, DCX, NR4A3, DLG4, PTEN
MousePheno	MP:0009746	enhanced behavioral response to xenobiotic	1.45e-05	14	48	SOD1, EHMT2, ATP1A3, ATP1A1, NR4A2, OPRM1, DLGAP3, CACNA1B, CACNA1A, KCNC1, DLG4, HOMER2, HOMER1, DRD2
GeneOntologyCellularComponent	GO:0043198	dendritic shaft	1.46e-05	9	30	ADRBK2, SLC1A2, MAP2, APP, GABBR1, ARHGEF2, CACNA1B, GRM5, GSK3B
MousePheno	MP:0008026	abnormal brain white matter morphology	1.54e-05	27	141	MAP2K4, EXT1, CDK5R1, MAP1B, MAP2, APP, APBB2, DCLK1, ARHGAP5, GFAP, HTT, ATCAY, MARCH7, NFIB, KLF7, CNP, DNM1L, NDST1, DCX, NUMBL, DCC, QKI, KIF1B, PSAP, MAPK8IP3, EPHA4, CELSR3
MousePheno	MP:0002888	abnormal NMDA-mediated synaptic currents	1.59e-05	9	21	RGS9, DLGAP3, GRIN1, GRIN2C, NRXN3, NRXN2, NRXN1, DLG4, MAPK8IP1
Drug	CID000004497	nimodipine	1.6e-05	23	145	CACNA1G, APLP1, GABRA2, ATP2B2, ATP2B1, GABRB2, CACNB4, CACNA1B, CACNA1A, CACNB1, CACNA2D1, CACNA1D, GRM3, GRM5, GRIN2C, CDK14, CACNA2D2, JUN, HOMER2, EDN3, DPYSL3, CACNG4, ATP2C1
MousePheno	MP:0001475	reduced long term depression	1.67e-05	10	26	CDK5R1, GFAP, CAMK4, CAMK2A, GRID2, CHRM1, PRKAR1B, PPP3R1, ARHGEF9, PTPN4
Drug	CID000004680	papaverine	1.69e-05	26	176	ADCY3, ADCY1, ADORA2A, PDE10A, CACNA1G, AGT, DST, CACNB4, CACNA1B, CACNA1A, CACNB1, CACNA2D1, CACNA1D, HBA2, GPI, XDH, CNP, NGB, CREB1, PDE1A, PDE4B, PLCG1, CACNA2D2, CACNG4, PLCB1, CYGB
GeneOntologyBiologicalProcess	GO:0043062	extracellular structure organization	1.77e-05	28	221	SMARCA4, AGT, MAP1B, ANK3, APP, APBB2, APLP2, APLP1, CADM1, ATP2B2, GPHN, CACNB4, CACNA1A, DNM3, ERC2, SPINT1, ABI3BP, GRIN1, SPOCK2, PRKCA, CTGF, NCAN, CACNA2D2, NRXN3, NRXN2, NRXN1, NLGN2, DRD2
Pathway	WNTPATHWAY	WNTPATHWAY	1.89e-05	9	26	APC, TLE1, CCND1, MAP3K7, GSK3B, NLK, CREBBP, CSNK2A1, CSNK1A1
GeneOntologyCellularComponent	GO:0032589	neuron projection membrane	1.97e-05	7	18	ADORA2A, SLC1A2, GABBR1, OPRM1, KCNB1, MAPK8IP3, SLC12A5
MousePheno	MP:0001513	limb grasping	2.16e-05	24	120	DNAJC5, PPARGC1A, ATXN1, LARGE, ATP2B2, NTRK3, CCND1, PAFAH1B1, GABRB3, DST, PBX3, CAMK4, CACNA1A, HTT, GRID2, PI4K2A, UBE3A, SBF2, CACNA2D2, RORB, HIPK2, PSAP, EPHA4, ELAVL4
Drug	D003010	Clorgyline	2.21e-05	24	158	CHD9, APC, TMEM106B, SFRS2IP, NDFIP2, ATRX, PHIP, GOLGA4, NRIP1, DST, UBE2W, TBC1D15, RGS5, SLK, RB1CC1, CHIC1, ZNF292, CPD, MBNL2, AKAP9, PCMTD1, ARID4A, ZNF644, ANKRD12
Pathway	SMOOTH_MUSCLE_CONTRACTION	SMOOTH_MUSCLE_CONTRACTION	2.31e-05	24	150	RGS9, SLC8A1, ADCY3, ADCY1, FOS, GJA1, GNG4, RAMP2, CAMK2B, GUCY1A3, CAMK2A, RGS5, RGS20, PRKCZ, PRKAR1B, PRKCA, PRKCB, PRKACB, CRH, ATF2, PDE4B, PLCG1, JUN, GNG13
MousePheno	MP:0008226	decreased anterior commissure size	2.32e-05	7	13	MAP2K4, MAP1B, MAP2, APP, DCLK1, ARHGAP5, DCX
Interaction	HPRD:03183	14-3-3 zeta	2.32e-05	23	123	ADRA2C, KSR1, MAPT, ATXN1, GABBR1, ARHGEF2, TLK2, STK25, BCR, CBL, HSPA1A, HSPA1B, NR4A1, YWHAZ, PRKCA, IGF1R, CDK17, TSC2, CSNK1A1, KIF5B, SIK3, EPB41L1, MARK2
Pathway	nfat_3pathway	Role of Calcineurin-dependent NFAT signaling in lymphocytes	2.4e-05	13	54	FKBP8, CAMK4, GSK3B, YWHAG, NR4A1, YWHAZ, PRKCZ, PRKCA, PPP3R1, CREBBP, RCAN2, CSNK2A1, CSNK1A1
Drug	CID000003016	diazepam	2.4e-05	27	190	ADCY3, ADCY1, ADORA2A, SLC4A3, FUS, GABRA2, FOS, GOT2, OPRK1, OPRM1, ZEB1, GABRB2, GABRB3, GAD2, GPHN, CACNA2D1, GRM5, GRIK5, GRIN2C, CRH, PER1, IDS, TTR, PPIG, ARHGEF9, SLC12A5, PVALB
GeneOntologyBiologicalProcess	GO:0006913	nucleocytoplasmic transport	2.45e-05	29	237	MBTPS1, THOC7, ATXN1, NUP98, BCL6, CAMK4, THOC2, HTT, KHDRBS1, NEDD4, SPTBN1, GSK3B, PRICKLE1, TGS1, RSRC1, TSC2, TRPS1, TPR, KPNA1, DDX25, RANBP2, AAAS, JUP, ANP32A, JUN, SMG1, UHMK1, SMG6, TNPO1
MousePheno	MP:0008415	abnormal neurite morphology	2.76e-05	30	170	ABCA2, MAP1B, MAPT, MBP, GABBR1, DCLK1, FOS, SEZ6, SLC17A7, DST, CAMK1G, CAMK2A, CACNA1A, NCAM1, CNTNAP1, POU3F1, PI4K2A, CNP, UBE3A, DNM1L, PLEC, SBF2, DAG1, CACNA2D2, NCSTN, ISLR2, QKI, PSAP, EPHA4, EGR2
Drug	D001464	Barium	2.8e-05	14	66	SLC8A1, SGK1, CACNA1G, OPRK1, OPRM1, CACNB4, CACNA1B, CACNA1A, CACNA2D1, CACNA1D, KCNQ1, KCNJ4, DRD2, PLCB1
Interaction	HPRD:02999	MAZ	2.81e-05	4	4	BPTF, MAZ, CSNK2A1, DCC
Domain	IPR002290	Ser_thr_pkinase	3e-05	31	236	SGK1, MAP2K4, MARK1, DCLK1, SBK1, TLK2, STK25, ULK1, CAMK2B, CAMK1G, CAMK4, CAMK2A, CAMKK2, GSK3B, SLK, PRKCZ, PRKG1, PRKCA, PRKCB, PRKACB, NLK, CDK14, PDPK1, CDK17, TAOK3, HIPK3, CSNK2A1, HIPK2, TAOK1, CDC42BPB, MARK2
Drug	D010852	Picrotoxin	3.02e-05	6	12	GABRA2, GABRB2, GAD2, CALB2, EDN3, PVALB
GeneOntologyBiologicalProcess	GO:0043524	negative regulation of neuron apoptosis	3.08e-05	13	65	DNAJC5, SOD1, SNCB, ADORA2A, AGT, NR4A2, STXBP1, CACNA1A, HTT, GPI, GRIN1, DLX1, HIPK2
GeneOntologyCellularComponent	GO:0016607	nuclear speck	3.09e-05	18	116	MEF2C, SFRS17A, SRRM1, RBM25, ZMIZ1, SFRS18, HSPA1B, PNN, PRPF19, RSRC1, DDX3X, MLL5, SF3B1, PPIG, SRRM2, LUC7L3, RBM39, ZBTB16
MousePheno	MP:0004097	abnormal cerebellar cortex morphology	3.09e-05	37	231	CDK5R2, MAP2K4, CDK5R1, MAP1B, MAP2, ATXN1, ANK3, IL1RAPL1, DCLK1, MID1, ATP2B2, ATP1B2, GJA1, BCR, CCND1, B4GALNT1, PAFAH1B1, CAMK4, CACNA1A, CCND2, NFIB, GRID2, GRIN2C, PI4K2A, ZIC1, CNP, VLDLR, ATF2, DNM1L, DCX, DAG1, CACNA2D2, QKI, MAPK8IP1, PTEN, PSAP, PVALB
GeneOntologyBiologicalProcess	GO:0051588	regulation of neurotransmitter transport	3.3e-05	11	48	ADORA2A, GABBR1, STXBP1, STX1A, CAMK2A, CACNA1B, CACNA1A, GRIK5, EDN3, DRD2, DPYSL2
MousePheno	MP:0000745	tremors	3.47e-05	34	206	ABCA2, MAP2K4, MAP1B, SCN1A, MAPT, MBP, ANK3, ATP2B2, ATP1B2, GABRB3, DST, KCNAB2, CAMK4, CACNA1A, HTT, CNTNAP1, SLC25A12, GRID2, POU3F1, PI4K2A, CNP, VLDLR, ATF2, UGT8, KIF5A, CACNA2D2, KCNMA1, KCNN2, KCNQ1, KCNC1, KCNA1, QKI, PSAP, EGR2
GeneOntologyBiologicalProcess	GO:0050905	neuromuscular process	3.65e-05	13	66	ADORA2A, SCN1A, APP, APLP2, ATP2B2, PAFAH1B1, CACNA1A, GRID2, GRIN1, GRIN2C, KCNMA1, NR4A3, DRD2
Pathway	h_crebPathway	Transcription factor CREB and its extracellular signals	3.69e-05	8	22	ADCY1, GRB2, PRKAR1B, PRKCA, CREB1, CREBBP, CUX1, PIK3R1
Pathway	NOS1PATHWAY	NOS1PATHWAY	3.69e-05	8	22	SYT1, GRIN1, GRIN2C, PRKAR1B, PRKCA, PRKCB, PRKACB, DLG4
Interaction	HPRD:03004	Calcium channel, voltage dependent, P/Q type, alpha 1A subunit	3.78e-05	5	7	CACNB4, CACNA1A, CACNB1, SYT1, CABP1
Interaction	122313	Affinity Capture-MS	3.78e-05	5	7	YWHAG, KIF5A, KIF5B, KIF5C, MAPK8IP3
Interaction	HPRD:05562	FUS interacting protein 1	3.78e-05	5	7	SNRNP70, SFRS12, FUS, TRA2A, YWHAG
MousePheno	MP:0004270	analgesia	3.81e-05	9	23	CDK5R2, CDK5R1, MAP1B, KIF1A, SLC17A7, KLF7, PCSK2, DLG2, KIF1B
Interaction	HPRD:04257	Protein arginine N-methyltransferase 1	3.85e-05	12	43	MBP, FUS, NRIP1, KHDRBS1, PRMT1, YWHAG, HABP4, ARPC3, HNRNPR, C1orf103, QKI, BTG2
Drug	CID000005070	riluzole	3.93e-05	25	174	SOD1, CACNA1G, SLC1A2, MAP2, GABRA2, GMFB, SLC17A7, GABRB2, GABRB3, GFAP, NRG3, CACNB4, CACNA1B, CACNA1A, CACNB1, CACNA2D1, CACNA1D, GRM3, GRM5, GRID2, GRIK5, GRIN2C, CACNA2D2, KCNC1, CACNG4
GeneOntologyBiologicalProcess	GO:0007628	adult walking behavior	4.07e-05	8	26	SCN1A, CACNB4, CACNA1A, CHD7, KCNMA1, HIPK2, DRD2, EPHA4
Domain	G3DSA:2.30.29.30	PH_type	4.08e-05	32	251	PLEKHA5, SH2D5, SBF1, APBB2, WASL, ARHGEF2, FRMD6, KIF1A, RASAL1, DNM3, GRB10, ELMO1, PDPK1, PLCG1, SBF2, NUMBL, CYTH1, RANBP2, HOMER2, RASAL2, HOMER1, SPRED2, MAPK8IP1, ARHGAP26, CDC42BPB, EPB41, EPB41L1, PTPN4, PLCB1, ACAP3, AGAP1, ARAP2
Drug	D013849	Thimerosal	4.3e-05	12	52	FOS, NR4A2, TMOD2, GRIN1, GRIK5, HSPB1, HSPA1A, HSPA1B, CPEB3, NR4A1, JUN, ARC
Pathway	GPCRPATHWAY	GPCRPATHWAY	4.33e-05	10	35	ADCY1, FOS, SYT1, PRKAR1B, PRKCA, PRKCB, PRKACB, CREB1, PLCG1, JUN
Interaction	HPRD:03402	Ribosomal S6 kinase 1	4.33e-05	10	31	FOS, NR4A2, GMFB, GRB2, NR4A1, CREB1, CREBBP, PDPK1, TSC2, NR4A3
Interaction	HPRD:04235	Syntaxin binding protein 1	4.4e-05	8	20	CDK5R1, MAPT, APBA1, DOC2B, STXBP1, STX1A, PRKCA, PRKCB
GeneOntologyMolecularFunction	GO:0005246	calcium channel regulator activity	4.87e-05	7	20	STX1A, HTT, GRM3, PRKCB, NRXN3, NRXN2, NRXN1
Pathway	PLCPATHWAY	PLCPATHWAY	4.91e-05	5	8	PRKCA, PRKCB, PLCG1, PIK3R1, PLCB1
GeneOntologyMolecularFunction	GO:0003714	transcription corepressor activity	5.17e-05	22	163	SCAI, MEIS2, EID1, MAP3K10, JAZF1, TLE1, NRIP1, TCF4, ZEB1, IRF2BP2, HTT, TBL1X, MXD4, BCL11A, HDAC5, ID4, HIPK3, KLF12, HIPK2, RBM9, ATN1, NCOR1
GeneOntologyCellularComponent	GO:0034708	methyltransferase complex	5.19e-05	12	60	KIAA1267, MAX, MCRS1, MLL3, HCFC1, OGT, HDAC2, KDM6A, RBBP4, JARID2, MLL5, CBX5
Drug	CID000005255	NAAG	5.25e-05	12	53	ACY1, GAD2, GFAP, GRM3, GRM5, GSK3B, GRIN1, GRIN2C, NCAN, SYNE1, HOMER2, TNPO1
MousePheno	MP:0002945	abnormal inhibitory postsynaptic currents	5.42e-05	15	60	NPAS4, CPLX2, APBA1, IL1RAPL1, GABBR1, CAMK4, CACNA1B, SYT1, ERC2, NOVA2, CHRM1, DCX, KCNA1, NRXN2, ARHGEF9
Drug	CID000005466	hydrochloride	5.43e-05	22	146	SLC6A11, ADORA2A, SLC1A2, GABRA2, FOS, MGAT3, GNA12, OPRK1, SLC17A7, GABRB2, GABRB3, GAD2, CACNA1B, CACNA2D1, KRIT1, GRM3, GRM5, GRIK5, CHRM1, NR1D2, PPIG, DRD2
MousePheno	MP:0002065	abnormal fear/anxiety-related behavior	5.6e-05	33	202	ABCA2, EHMT2, ADCY1, PPARGC1A, NPAS4, ADORA2A, CPLX2, SLC2A3, MAP6, MAP2, MAPT, APP, GABBR1, FOS, ATP1A1, NR4A2, SLC17A7, GAD2, CAMK2A, DLGAP3, CACNB4, CACNA1B, GRIN1, IDS, SYNPO, GIT1, RASD2, NPEPPS, FXR2, PSAP, DRD2, ARHGEF9, ARC
Drug	C044101	endotoxin, Escherichia coli	5.61e-05	10	38	SOD1, APP, APLP1, GMFB, HSPB1, CREBBP, JAK1, JUN, MAPK8IP3, C1QL3
MousePheno	MP:0002906	increased susceptibility to pharmacologically induced seizures	5.63e-05	17	74	MT3, SLC4A3, SLC1A2, CDK5R1, SCN1A, SCN2B, GFAP, CNTN2, GRIK5, CACNA2D2, KCNQ2, KCNA1, KCNA2, NR4A3, NEUROD6, SLC12A5, PLCB1
MousePheno	MP:0005277	abnormal brainstem morphology	5.67e-05	11	35	PPARGC1A, MAPT, DCLK1, ATP2B2, ATP1B2, GRIN1, IGF1R, DNM1L, DCX, KIF1B, PSAP
Interaction	HPRD:04015	C-terminal binding protein 1	5.9e-05	10	32	APC, NRIP1, ZEB1, HTT, HDAC2, ZEB2, PNN, CREBBP, KLF12, FOXP1
GeneOntologyCellularComponent	GO:0000307	cyclin-dependent protein kinase holoenzyme complex	6.6e-05	6	15	CDK5R2, CDK5R1, CCNY, CCND1, CCND2, CDK14
MousePheno	MP:0000812	abnormal dentate gyrus morphology	6.75e-05	17	75	CDK5R2, CDK5R1, MAP1B, MAPT, APBB2, DCLK1, ATRX, GJA1, PAFAH1B1, GFAP, HDAC2, NFIB, KLF7, VLDLR, DCX, PTEN, NEUROD6
Interaction	HPRD:01140	Microtubule associated protein 2	6.81e-05	7	16	MAP2, MARK1, PAFAH1B1, GRB2, GRIN1, CPEB1, PLEC
Interaction	HPRD:04620	Insulin receptor substrate 4	6.81e-05	7	16	NISCH, IRS4, GRB2, YWHAG, PRKCZ, IGF1R, PIK3R1
Pathway	CARM_ERPATHWAY	CARM_ERPATHWAY	6.87e-05	9	30	PPARGC1A, MEF2C, NRIP1, CCND1, HDAC2, MED1, HDAC5, CREBBP, GRIP1
GeneOntologyMolecularFunction	GO:0060589	nucleoside-triphosphatase regulator activity	6.88e-05	13	70	RGS9, WASL, RALGAPA1, RAPGEFL1, RAPGEF5, RPH3A, PEX5L, DNAJC1, TSC2, RASGRP1, CYTH1, GIT1, RASAL2
GeneOntologyBiologicalProcess	GO:0010970	microtubule-based transport	7.02e-05	7	21	APP, APBA1, PAFAH1B1, HTT, PRKCZ, KIF5B, KIF1B
MousePheno	MP:0001458	abnormal object recognition memory	7.05e-05	10	30	MAPT, APP, GABBR1, SLC17A7, CAMK2A, GRIN1, CREBBP, RCAN2, KCNH3, ARC
MousePheno	MP:0003121	genomic imprinting	7.47e-05	12	42	ABCB7, DLK1, EHMT2, SGCE, ATRX, GRB10, MEG3, PEG3, IGF2R, IGF1R, UBE3A, ARID4A
Drug	CID000004938	propentofylline	7.48e-05	9	32	ADORA2A, SLC1A2, APP, APLP1, GFAP, XDH, EPB41, EPHA4, GDA
MousePheno	MP:0002885	abnormal AMPA-mediated synaptic currents	7.54e-05	7	15	ADARB1, GRIN1, NRXN3, NRXN2, NRXN1, DLG4, ARC
MousePheno	MP:0004859	abnormal synaptic plasticity	7.58e-05	11	36	ADCY1, CPLX2, KSR1, MAP6, SYNGR1, NRGN, CAMK2B, CAMK2A, GRIN1, VLDLR, ARHGEF9
Pathway	h_gpcrPathway	Signaling from G-Protein Families	7.59e-05	8	24	ADCY1, FOS, PRKAR1B, PRKCA, CREB1, CREBBP, PLCG1, JUN
Pathway	pdgfrapathway	PDGFR-alpha signaling pathway	7.59e-05	8	24	FOS, GRB2, RAPGEF1, PLCG1, PIK3R1, CSNK2A1, JAK1, JUN
Drug	D024505	Tocopherols	7.72e-05	14	72	DNAJC5, SNCB, CPLX2, CDK5R1, ARF3, SYNGR1, ATP1B2, CCND1, STXBP1, STX1A, VAMP2, SYN2, GRIN1, RAB6B
Interaction	HPRD:02221	Histone H3 K9 methyltransferase 1	7.86e-05	9	27	SBF1, HIST1H3A, HDAC2, BCL11B, HDAC5, CREBBP, RBBP4, DNMT3A, CBX5
Drug	CID000003784	isradipine	8.23e-05	17	100	CACNA1G, AGT, SEMA5A, NR4A2, GAD2, CACNB4, CACNA1B, CACNA1A, CACNB1, CACNA2D1, CACNA1D, GSK3B, HSPA4, CACNA2D2, KCNMA1, DRD2, CACNG4
GeneOntologyMolecularFunction	GO:0019887	protein kinase regulator activity	8.26e-05	15	91	WNK1, CDK5R2, CDK5R1, APC, CCNY, CCND1, GMFB, NRG3, IKBKAP, YWHAG, PRKAR1B, TAOK3, TAOK1, MAPK8IP1, KIDINS220
Drug	CID000005657	veratridine	8.34e-05	25	182	SLC6A11, ADCY3, ADCY1, ADORA2A, CACNA1G, FOS, ATP1A3, ATP1A1, GAD2, CACNB4, CACNA1B, CACNA1A, CACNB1, CACNA2D1, CACNA1D, SYN2, GPI, GRIK5, GRIN2C, CHRM1, CRH, CACNA2D2, DRD2, B3GAT1, CACNG4
MousePheno	MP:0008840	abnormal spike wave discharge	8.51e-05	6	11	CACNA1G, SCN1A, ATP1A3, CACNA1A, UBE3A, PTEN
MousePheno	MP:0004008	abnormal GABA-mediated receptor currents	8.51e-05	6	11	GABRA2, GABRB2, GABRB3, NRXN3, NRXN2, NRXN1
Interaction	HPRD:03007	Synapse associated protein 97	8.79e-05	15	68	MPP2, MAP1A, ATP2B2, BCR, CAMK2A, DLGAP3, KCNJ4, KCNA1, KCNA2, DLG2, GNG13, KIF1B, PTEN, EPB41, GDA
Domain	IPR013126	Hsp_70	8.93e-05	6	14	HSPA13, HSPA12A, HSPA8, HSPA4, HSPA1B, ANKRD45
Pathway	mtor_v2pathway	mTOR signaling pathway	9.01e-05	14	69	PPARGC1A, SGK1, DDIT4, ULK1, RRAGD, PDCD4, RB1CC1, YWHAG, YWHAZ, PRKCA, PDPK1, TSC2, EIF4A1, EIF4B
Interaction	HPRD:02222	O-linked N-acetylglucosamine transferase	9.3e-05	6	12	MAPT, HCFC1, OGT, GSK3B, TRAK2, CSNK2A1
Interaction	HPRD:01476	Protein tyrosine phosphatase, receptor type, alpha	9.3e-05	6	12	SRC, GRB2, KCNA2, PTPRD, PTPRF, PTPRS
MousePheno	MP:0004753	abnormal miniature excitatory postsynaptic currents	9.62e-05	12	43	ADCY1, NPAS4, CPLX2, SLC17A7, VAMP2, CACNA1B, CACNA1A, GRIN1, GRIN2C, CHRM1, EPHA4, ARC
GeneOntologyBiologicalProcess	GO:0050773	regulation of dendrite development	9.69e-05	8	29	SGK1, SIPA1L1, GSK3B, GRIN1, NUMBL, SYNE1, DBN1, PTPRF
Interaction	116168	Reconstituted Complex	9.99e-05	13	54	ARHGEF2, USP8, NRIP1, CBL, MED1, PRKCZ, HDAC5, PDPK1, TSC2, DDX6, KIF5B, KIF5C, MARK2
MousePheno	MP:0009750	impaired behavioral response to addictive substance	0.000100175	11	37	ADORA2A, APBA1, AQP4, OPRK1, OPRM1, CACNA1B, GRM5, GRIN1, GPRASP1, DLG4, DRD2
GeneOntologyMolecularFunction	GO:0032403	protein complex binding	0.000101047	32	295	RGS9, ACTN1, ACVR2B, AP2B1, MAP1B, MAX, NISCH, ACVR1C, PHIP, TIMP2, CCND1, ULK1, STRN3, DST, VAMP2, IRS4, RTN4, SPTBN1, GRB10, RPH3A, PI4K2A, YWHAZ, MAGI2, PDPK1, IGF1R, PCSK2, CTGF, PLCG1, PIK3R1, PSMD14, SYNM, PTPRF
GeneOntologyCellularComponent	GO:0044224	juxtaparanode region of axon	0.000101283	4	6	KCNAB2, CNTN2, KCNA1, KCNA2
MousePheno	MP:0001923	reduced female fertility	0.000102528	34	217	ABCA2, SLC6A6, SOD1, ADCY3, MBTPS1, FUS, GABBR1, LARGE, DCLK1, GJA1, GABRB3, MLL3, CAMK4, CACNA1A, SRC, TIPARP, GRID2, PI4K2A, PRKG1, PER1, IGF2R, UBE3A, PCSK2, TYRO3, CHD7, DCX, NUMBL, CACNA2D2, MLL5, INHBA, MARK2, LCN2, RAD23B, PLCB1
Drug	D006220	Haloperidol	0.000103279	7	20	FOS, GJA1, GAD2, GSK3B, PRKCB, VLDLR, DRD2
Pathway	P00037	Ionotropic glutamate receptor	0.00010854	11	46	SLC1A2, CAMK2B, CAMK2A, VAMP2, CACNA1B, CACNA1A, SHANK3, GRM3, GRIN1, GRIK5, GRIN2C
MousePheno	MP:0005404	abnormal axon morphology	0.00010971	23	124	ABCA2, MAP1B, MAPT, MBP, GABBR1, DCLK1, SLC17A7, DST, CACNA1A, NCAM1, CNTNAP1, POU3F1, PI4K2A, CNP, PLEC, SBF2, DAG1, CACNA2D2, ISLR2, QKI, PSAP, EPHA4, EGR2
MousePheno	MP:0005402	abnormal action potential	0.000113772	17	78	CACNA1G, SCN1A, ANK3, GABBR1, ATP2B2, OPRM1, GABRB3, CACNA1A, CNTNAP1, CHD7, SBF2, DAG1, KCNMA1, KCNA1, KCNA2, NEUROD6, SLC12A5
Interaction	HPRD:08950	Histone deacetylase 3	0.000114972	14	62	NRIP1, CCND1, TBL1X, HSPA8, HSPA4, HDAC5, CREBBP, KLF6, CSNK2A1, ANKRD11, RBBP4, JUN, ARID4A, NCOR1
GeneOntologyBiologicalProcess	GO:0006897	endocytosis	0.000116865	32	297	ADORA2A, AP2A2, AP2A1, GAPVD1, SORT1, APP, APLP1, CAP1, ULK1, RAMP2, TFRC, STXBP1, CBL, DNM3, NEDD4, GRB2, ELMO1, ATP6V1H, PRKCA, LRP1B, ELMOD1, VLDLR, IGF2R, UBE3A, TSC2, SYNE1, DLG4, LRP1, PTEN, DRD2, RAB5C, ARC
GeneOntologyBiologicalProcess	GO:0046777	protein amino acid autophosphorylation	0.000117845	17	115	WNK1, MAP3K10, NTRK3, BCR, ULK1, CAMK2B, CAMK2A, CAMKK2, SLK, NLK, IGF1R, TAOK3, CSNK2A1, CSNK1G1, JUN, SMG1, UHMK1
GeneOntologyBiologicalProcess	GO:0021953	central nervous system neuron differentiation	0.000120609	10	46	DCLK1, NR4A2, LHX8, PAFAH1B1, CACNA1A, BCL11B, PRKCA, DCX, DCC, DRD2
MousePheno	MP:0003871	abnormal myelin sheath morphology	0.000122865	12	44	ABCA2, MBP, GABBR1, DST, NCAM1, CNTNAP1, CNP, SBF2, DAG1, QKI, PSAP, EGR2
MousePheno	MP:0003634	abnormal glial cell morphology	0.000123422	36	237	DNAJC5, PPARGC1A, NPAS4, MT3, SLC4A3, MBP, APP, LARGE, ATP1A3, CADM1, GJA1, BCR, PAFAH1B1, DST, GFAP, NCAM1, HTT, NFIB, PEA15, POU3F1, PI4K2A, CNP, UGT8, IGF1R, ID4, NDST1, DAG1, CACNA2D2, GPR56, NCSTN, KCNA1, QKI, PTEN, PSAP, MAPK8IP3, EGR2
MousePheno	MP:0002801	abnormal long term object recognition memory	0.000124853	7	16	MAPT, APP, SLC17A7, CAMK2A, CREBBP, KCNH3, ARC
Pathway	ARENRF2PATHWAY	ARENRF2PATHWAY	0.000125379	6	14	FOS, KEAP1, PRKCA, PRKCB, CREB1, JUN
Pathway	DREAMPATHWAY	DREAMPATHWAY	0.000125379	6	14	FOS, OPRK1, PRKAR1B, PRKACB, CREB1, JUN
GeneOntologyBiologicalProcess	GO:0007612	learning	0.000125962	13	74	SGK1, ATXN1, APP, FOS, ATP1A3, HTT, GRM5, GRIN1, AAAS, JUN, DLG4, DRD2, PLCB1
Interaction	HPRD:00886	14-3-3 theta	0.000129564	16	78	SLC8A1, USP8, BCR, CBL, HSPA8, HSPA1A, YWHAG, CDK14, PDPK1, TSC2, CSNK2A1, CSNK1A1, TPR, KIF5B, EPB41, EPB41L1
Interaction	HPRD:09697	HIP14	0.000132238	4	5	HTT, SYT1, ZDHHC17, DLG4
Interaction	HPRD:06913	SRRM2	0.000132238	4	5	SRRM1, PNN, YWHAG, SRRM2
Pathway	erbb1_downstream_pathway	ErbB1 downstream signaling	0.000133366	19	117	MAP2K4, KSR1, MEF2C, WASL, FOS, SRC, GRB2, YWHAG, YWHAZ, PRKCZ, PRKCA, CREB1, ATF2, ARPC3, PDPK1, TSC2, PIK3R1, JUN, CYFIP2
Pathway	h_pparaPathway	Mechanism of Gene Regulation by Peroxisome Proliferators via PPARa(alpha)	0.000133713	11	47	PPARGC1A, NRIP1, SRC, MED1, HSPA1A, HSPA4, PRKAR1B, PRKCA, CREBBP, JUN, NCOR1
Interaction	116125	Affinity Capture-MS	0.000137335	10	35	SNRNP70, SFRS8, AP2B1, SRRM1, SRPK2, PNN, THRAP3, CSNK2A1, PSME3, USP7
Drug	CID000002951	dantrolene	0.000142016	21	145	MBTPS1, CACNA1G, AGT, CACNB4, CACNA1B, CACNA1A, CACNB1, CACNA2D1, CACNA1D, CAMKK2, RTN4, GPI, GRM3, GRM5, GRIN2C, CHKA, PRKCA, HIPK3, CACNA2D2, HOMER2, CACNG4
GeneOntologyBiologicalProcess	GO:0007411	axon guidance	0.000144628	18	128	EXT1, ALCAM, CDK5R1, ANK3, SEMA5A, APP, APBB2, KLF7, UNC5A, KIF5C, DCC, NRXN3, NRXN1, ABLIM1, MAPK8IP3, DPYSL3, EPHA4, EGR2
MousePheno	MP:0002204	abnormal neurotransmitter level	0.000145215	15	65	ADRA2C, CPLX2, NR4A2, SLC17A7, GAD2, STXBP1, VAMP2, CACNA1A, SYT1, ERC2, LPHN1, CACNA2D2, NRXN3, NRXN2, NRXN1
GeneOntologyMolecularFunction	GO:0016527	brain-specific angiogenesis inhibitor activity	0.000148724	3	3	BAI1, BAI2, BAI3
GeneOntologyMolecularFunction	GO:0035256	metabotropic glutamate receptor binding	0.000148724	3	3	ADORA2A, HOMER2, HOMER1
Drug	CID000003954	loperamide	0.000153167	17	105	CACNA1G, OPRK1, OPRM1, CACNB4, CACNA1B, CACNA1A, CACNB1, CACNA2D1, CACNA1D, GRIN2C, PRKCZ, PRKCA, PRKCB, CRH, CACNA2D2, PPIG, CACNG4
Drug	CID000004054	memantine	0.000157922	15	86	MMP16, SLC17A7, GRM3, GRM5, NMBR, GSK3B, GRID2, GRIN1, GRIK5, GRIN2C, HSPA4, PPP2R4, CPM, DBN1, NCSTN
MousePheno	MP:0008285	abnormal hippocampus granule cell layer	0.000158622	6	12	AGT, CDK5R1, DCX, DAG1, PSAP, NEUROD6
GeneOntologyMolecularFunction	GO:0016247	channel regulator activity	0.000160408	12	66	WNK1, TMPRSS3, STX1A, KCNAB2, HTT, NEDD4, GRM3, PRKCZ, PRKCB, NRXN3, NRXN2, NRXN1
Interaction	HPRD:00783	Heme oxygenase 2	0.0001621	6	13	APP, GPRASP1, C1orf103, CSNK2A1, KCNMA1, GIT1
Pathway	ST_DIFFERENTIATION_PATHWAY_IN_PC12_CELLS	ST_DIFFERENTIATION_PATHWAY_IN_PC12_CELLS	0.000163687	11	48	MAP2K4, MAP1B, SRC, CREB1, CREBBP, PIK3R1, DAG1, JUN, MAPK8IP1, MAPK8IP3, EGR2
GeneOntologyBiologicalProcess	GO:0007616	long-term memory	0.000164557	6	17	ADCY1, SGK1, GRIN1, PRKCZ, CRH, DRD2
Pathway	PPARAPATHWAY	PPARAPATHWAY	0.000165224	12	56	PPARGC1A, NRIP1, MED1, HSPA1A, PRKAR1B, PRKCA, PRKCB, PRKACB, CREBBP, PIK3R1, JUN, NCOR1
Drug	D001556	Lindane	0.00016726	25	190	DNAJC5, SNRNP70, SGK1, WASL, ACVR1C, GABRA2, MTCH2, RALGAPA1, GJA1, GNA12, KLF9, GABRB2, GABRB3, SULT1A1, OGT, SLC4A4, NFIB, HSPA1A, RAB14, PJA2, PRKACB, CPD, TYRO3, JUN, RAD23A
Drug	CID000001066	quinolinic acid	0.000167655	24	179	SOD1, PPARGC1A, ADORA2A, SORT1, FOS, GAD2, GFAP, CALB2, HTT, GRM3, GRM5, GRIK5, GRIN2C, CNTFR, SLC23A2, CREB1, TTR, TPR, ZDHHC17, HOMER2, ATN1, DRD2, B3GAT1, PVALB
GeneOntologyBiologicalProcess	GO:0051129	negative regulation of cellular component organization	0.000169388	25	213	SGK1, MAP1B, MAP1A, MAP2, MAPT, MBP, APC, MID1, ARHGEF2, ULK1, HDAC2, RTN4, SPTBN1, GSK3B, HSPA1B, RUFY3, EIF2C2, PRKCZ, UBE2B, TPM1, TPR, JARID2, PTEN, EIF4EBP2, PTPRF
Domain	SM00545	JmjN	0.000173278	4	6	KDM4B, KDM5A, JARID2, KDM4A
GeneOntologyBiologicalProcess	GO:0014065	phosphoinositide 3-kinase cascade	0.000181516	7	24	AGT, NEDD4, IGF1R, UBE3A, TSC2, PIK3R1, NCOR1
Drug	CID000003446	gabapentin	0.000181789	23	169	SLC6A11, FSCN1, CACNA1G, GABRA2, GOT2, GABRB2, GABRB3, CACNB4, CACNA1B, CACNA1A, CACNB1, CACNA2D1, CACNA1D, AGXT2L1, GRM3, GRM5, GRID2, GRIK5, GRIN2C, SLC7A5, CACNA2D2, PPIG, CACNG4
Pathway	P00039	Metabotropic glutamate receptor group III	0.000186497	13	65	SLC1A2, GNG4, SLC17A7, STX1A, VAMP2, CACNA1B, CACNA1A, CACNB1, GRM5, GRIN1, GRIK5, GRIN2C, PRKAR1B
Interaction	HPRD:00449	Cyclin dependent kinase 5	0.000189936	12	50	ACTN1, CDK5R2, CDK5R1, MAPT, APP, MEF2A, STXBP1, STX1A, CCND2, SRC, GSK3B, DCX
MousePheno	MP:0002184	abnormal innervation	0.000191297	31	197	DNAJC5, ADCY3, ALCAM, MAPT, APP, APLP2, ATP2B2, NTRK3, SEZ6, GABRB2, GABRB3, GPHN, CACNB4, CACNA1D, CNTN2, GRID2, KLF7, CHD7, ODZ3, DAG1, CACNA2D2, SYNE1, KCNMA1, DNMT3A, DLG4, PLXND1, PSAP, EPHA4, EGR2, CELSR3, RIMS2
Pathway	PW:0000143	insulin signaling	0.00019317	8	27	SRC, GRB10, GRB2, PRKCA, PRKCB, PDPK1, PIK3R1, PTPRF
Pathway	h_At1rPathway	Angiotensin II mediated activation of JNK via Pyk2 dependent signaling	0.00019317	8	27	MAP2K4, AGT, MEF2A, SRC, GRB2, PRKCA, ATF2, JUN
Interaction	114974	Affinity Capture-Western; Co-localization; Reconstituted Complex; Two-hybrid	0.000196814	9	30	SMARCA4, FOS, BCL6, HDAC2, TBL1X, NR4A1, JUN, NCOR1, ZBTB16
MousePheno	MP:0009454	impaired contextual conditioning behavior	0.000197675	7	17	KSR1, MAPT, KLF9, GRIN2C, UBE3A, NCSTN, GIT1
Interaction	HPRD:04582	Disabled-1	0.000197867	8	24	APP, APLP2, APLP1, PAFAH1B1, SRC, VLDLR, PLCG1, LRP1
Pathway	h_p35alzheimersPathway	Deregulation of CDK5 in Alzheimers Disease	0.000198243	5	10	CDK5R1, MAPT, APP, GSK3B, CSNK1A1
GeneOntologyMolecularFunction	GO:0005158	insulin receptor binding	0.000204574	8	32	PHIP, IRS4, GRB10, PDPK1, IGF1R, PLCG1, PIK3R1, PTPRF
MousePheno	MP:0001454	abnormal cued conditioning behavior	0.000208405	15	67	KSR1, ATXN1, APP, TIMP2, STX1A, CAMK2A, GRM5, PRKCB, PRKACB, VLDLR, CREB1, DBN1, KCNN2, GIT1, ARC
MousePheno	MP:0001486	abnormal startle reflex	0.000210683	20	105	ABCA2, ABL2, DNAJC5, PPARGC1A, ADRA2C, SLC2A3, NXPH3, MID1, FOS, ATE1, ATP2B2, SLC17A7, DST, PBX3, CACNA1B, TMOD2, GRIN1, GRIK5, KCNA1, PLCB1
Domain	IPR003070	Nuc_orph_rcpt	0.00021359	3	3	NR4A2, NR4A1, NR4A3
Drug	CID000001206	methamphetamine	0.000214541	22	160	ADORA2A, ADRBK2, SLC1A2, MAPT, MAZ, FOS, NR4A2, ZEB1, SLC17A7, GABRB2, GFAP, GRM5, GRIN2C, HSPB1, NR4A1, CRY1, CREB1, CSMD1, JUN, HOMER1, DRD2, DPYSL2
Pathway	PAR1PATHWAY	PAR1PATHWAY	0.000216448	7	21	ADCY1, GNA12, MAP3K7, PRKCA, PRKCB, PIK3R1, PLCB1
Drug	D003300	Copper	0.000217525	17	108	SOD1, MT3, APP, APBA1, FOS, ATOX1, SYT1, SRC, CHRM1, HSPA8, HSPA1A, HSPA1B, CREB1, ATF2, TTR, JUN, LRP1
Pathway	h_CaCaMPathway	Ca++/ Calmodulin-dependent Protein Kinase Activation	0.000220272	4	6	CAMK4, CAMKK2, CREB1, CREBBP
Interaction	HPRD:03184	14-3-3 Beta	0.00022623	21	124	SLC8A1, GAPVD1, MAPT, FRMD6, BCR, CBL, SRC, HSPA1A, HSPA1B, YWHAG, PRKCZ, CDK14, HDAC5, IGF1R, TSC2, CSNK2A1, KIF5B, SRRM2, EPB41, EPB41L1, MARK2
GeneOntologyCellularComponent	GO:0042382	paraspeckles	0.00022654	4	7	SFPQ, CPSF6, NUDT21, NEAT1
Interaction	HPRD:00697	N-methyl D-aspartate receptor subunit 2B	0.000228056	10	37	CAMK2B, CAMK2A, SRC, GRIN1, ARHGAP32, PRKCA, PRKCB, PLCG1, DLG2, DLG4
GeneOntologyBiologicalProcess	GO:0070838	divalent metal ion transport	0.000229191	22	180	SLC8A1, ADORA2A, CACNA1G, IL1RAPL1, ATP2B2, ATP2B1, GJA1, CAMK2B, CAMK2A, CACNB4, CACNA1B, CACNA1A, CACNB1, CACNA2D1, CACNA1D, GRIN1, PRKCB, CTGF, PLCG1, CACNA2D2, CACNG4, ATP2C1
GeneOntologyBiologicalProcess	GO:0021955	central nervous system neuron axonogenesis	0.000235789	6	18	DCLK1, NR4A2, PAFAH1B1, PRKCA, DCX, DCC
Interaction	HPRD:01819	c-Src	0.000237796	30	208	ACTN1, KCNQ5, GJA1, BCR, GFAP, CBL, CNTNAP1, KHDRBS1, SRC, GRB10, GRB2, ARHGAP32, YWHAG, PRKCZ, PRKCA, PPP2R4, PDCD6IP, PDPK1, IGF1R, TYRO3, PLCG1, PIK3R1, DAG1, ANKRD11, KCNB1, JUP, DLG4, GIT1, LRP1, GAB3
Drug	CID000012388	tridecane	0.000239911	18	119	DLK1, MAP2K4, MEF2C, OPRK1, OPRM1, SLC17A7, HDAC2, SYN2, GPM6B, BCL11B, UBE2K, CRH, PEG3, UBE3A, KLF6, CUL5, DNMT3A, GPRIN1
GeneOntologyBiologicalProcess	GO:0060079	regulation of excitatory postsynaptic membrane potential	0.000240627	7	25	ADORA2A, ATXN1, OPRM1, GRID2, GRIN1, GRIK5, GRIN2C
MousePheno	MP:0001504	abnormal posture	0.000240977	28	173	DNAJC5, CPLX2, MAP1B, SCN1A, GABBR1, LARGE, FLNB, ATP2B2, SLC17A7, DST, PBX1, GPHN, PBX3, CACNB4, CACNA1A, CACNB1, SLC25A12, GRID2, NR4A1, CNP, UBE3A, SBF2, KIF5A, KCNN2, KCNA1, NR4A3, DRD2, SLC12A5
GeneOntologyMolecularFunction	GO:0008331	high voltage-gated calcium channel activity	0.000241875	4	7	CACNB4, CACNA1A, CACNB1, CACNA1D
GeneOntologyBiologicalProcess	GO:0051898	negative regulation of protein kinase B signaling cascade	0.000242886	4	7	IGF1R, TSC2, PTEN, DRD2
Pathway	P00027	Heterotrimeric G-protein signaling-Gq alpha and Go alpha mediated	0.000243975	17	103	RGS9, ADORA2A, GNG4, OPRK1, CACNA1B, CACNA1A, GPSM1, RGS5, GRM3, RGS20, GRM5, CHRM1, PRKCZ, PRKCA, PRKCB, GNG13, DRD2
Drug	CID000004687	paraxanthine	0.000244736	11	53	ADORA2A, SEMA5A, NR4A2, GAD2, GSK3B, TIPARP, HSPA4, XDH, PPIG, DRD2, UHMK1
Interaction	HPRD:11451	PTPRF interacting protein alpha 1	0.000246916	7	19	TNNT1, ERC2, YWHAG, GIT1, PTPRD, PTPRF, PTPRS
Interaction	111384	Reconstituted Complex	0.000246916	7	19	FOS, BCL6, HDAC2, NR4A1, ATF2, CREBBP, JUN
Interaction	115331	Affinity Capture-Western; Reconstituted Complex	0.000246916	7	19	MEF2A, NRIP1, BCL6, TBL1X, HDAC5, NCOR1, ZBTB16
MousePheno	MP:0005316	abnormal response to tactile stimuli	0.000248075	15	68	ADCY1, CDK5R2, CDK5R1, MAP1B, GABBR1, KIF1A, SLC17A7, DST, PBX3, CACNA1B, CACNA1A, KLF7, PCSK2, DLG2, KIF1B
GeneOntologyBiologicalProcess	GO:0060627	regulation of vesicle-mediated transport	0.000248589	13	79	CACNA1G, IL1RAPL1, STXBP1, STX1A, VAMP2, SYT1, PRKCA, TSC2, SYNE1, PTEN, DRD2, RAB27B, RAB5C
Pathway	ST_GRANULE_CELL_SURVIVAL_PATHWAY	ST_GRANULE_CELL_SURVIVAL_PATHWAY	0.00025556	8	28	MAP2K4, APC, FOS, CREB1, DAG1, JUN, MAPK8IP1, MAPK8IP3
Interaction	115106	Reconstituted Complex	0.000259598	9	31	MEF2A, MEF2C, BCL6, YWHAG, YWHAZ, NR2C2, RBBP4, NCOR1, ZBTB16
MousePheno	MP:0004996	abnormal CNS synapse formation	0.000272375	8	23	SYN2, GRID2, CHRM1, DNM1L, NCSTN, NRXN3, NRXN2, NRXN1
MousePheno	MP:0002578	impaired ability to fire action potentials	0.000274701	6	13	CACNA1G, ANK3, OPRM1, KCNMA1, KCNA2, NEUROD6
Drug	CID000643998	GDP-beta-S	0.000280458	22	163	ADCY3, ADCY1, MBTPS1, ADORA2A, ADRBK2, FZD2, C21orf33, CACNA1B, CACNA1A, CACNA2D1, TBL1X, GRM5, CHRM1, TGS1, PRKCA, PRKCB, KCNMA1, KCNJ4, HOMER2, ARHGAP26, B3GAT1, PLCB1
Domain	PF02793	HRM	0.000281463	7	23	BAI1, BAI2, BAI3, LPHN1, CELSR2, CELSR3, LPHN3
GeneOntologyMolecularFunction	GO:0030165	PDZ domain binding	0.000285282	12	70	MPP2, APBA1, CADM1, ATP2B2, ATP2B1, GJA1, GRIN2C, KIRREL3, DLG2, DLG4, PTEN, ABLIM1
Interaction	HPRD:01498	Protein kinase C alpha	0.000288873	26	172	FSCN1, MBP, APLP2, ATP2B2, ATP2B1, NRGN, GJA1, GNA12, GMFB, GFAP, STXBP1, CBL, SRC, PEA15, GRM5, HSPA1A, YWHAG, YWHAZ, PRKCZ, HABP4, PRKG1, PRKCA, KCNQ2, DLG4, BTG2, PLCB1
Pathway	met_pathway	Signaling events activated by Hepatocyte Growth Factor Receptor (c-Met)	0.000289942	11	51	MAP2K4, FOS, CBL, SRC, GRB2, RAPGEF1, PDPK1, PLCG1, PIK3R1, JUN, PTEN
Pathway	SIG_INSULIN_RECEPTOR_PATHWAY_IN_CARDIAC_MYOCYTES	SIG_INSULIN_RECEPTOR_PATHWAY_IN_CARDIAC_MYOCYTES	0.000289942	11	51	FLOT2, CAP1, IRS4, CBL, GSK3B, GRB2, YWHAG, YWHAZ, PIK3R1, BRD4, PTEN
GeneOntologyMolecularFunction	GO:0051219	phosphoprotein binding	0.000292464	9	42	PAFAH1B1, NEDD4, GRB2, IGF2R, PLCG1, PTPN5, CSNK1A1, CSNK1G1, GPRIN1
Drug	CID000004624	6-hydroxydopamine	0.000297405	30	255	ADCY3, ADCY1, SNCB, ADORA2A, SLC1A2, MAPT, MAZ, FOS, DDIT4, NR4A2, OPRK1, OPRM1, CCND1, SLC17A7, GAD2, GFAP, CALB2, SYN2, MARCH7, GRM5, GRIN2C, CHRM1, HSPA4, CRH, CREB1, DNM1L, PDE4B, DRD2, NEUROD6, PVALB
MousePheno	MP:0001895	abnormal hippocampus function	0.000301283	7	18	SLC4A3, GRIK5, DCX, KCNA1, MAPK8IP1, NEUROD6, PLCB1
MousePheno	MP:0000771	abnormal brain size	0.000305881	26	158	SCN1A, ATXN1, APP, ATE1, NCAM1, HTT, HDAC2, SYN2, VLDLR, ATF2, IGF2R, IGF1R, UBE3A, ID4, KIF5C, DAG1, CACNA2D2, KCNA1, KIF1B, PTEN, MAPK8IP3, EPB41L1, NEUROD6, MARK2, PLCB1, PTPRS
MousePheno	MP:0001524	impaired limb coordination	0.000310775	13	55	MID1, ATP2B2, NTRK3, DST, CACNB4, CACNA1A, HTT, ZIC1, CNP, ATF2, PSAP, EPHA4, EGR2
GeneOntologyBiologicalProcess	GO:0051932	synaptic transmission, GABAergic	0.000314298	7	26	ADORA2A, NISCH, GABRB3, STXBP1, CACNB4, CACNA1A, DRD2
MousePheno	MP:0004746	abnormal cochlear IHC afferent innervation	0.000315109	5	9	NTRK3, GABRB3, CACNA1D, KCNMA1, PSAP
Interaction	HPRD:03131	PTK2B protein tyrosine kinase 2 beta	0.000323851	14	68	ARHGAP5, DLGAP3, CBL, SRC, GRB2, RB1CC1, PDCD6IP, PDPK1, PIK3R1, KCNA2, JAK1, DLG4, PITPNM2, PITPNM1
GeneOntologyBiologicalProcess	GO:0007623	circadian rhythm	0.000330145	12	71	PGLYRP1, HEBP1, GPRASP1, CRY1, CRH, PER1, CREB1, KCNMA1, JUN, PTGDS, DRD2, NCOR1
Pathway	PYK2PATHWAY	PYK2PATHWAY	0.000333516	8	29	MAP2K4, SYT1, SRC, GRB2, PRKCA, PRKCB, PLCG1, JUN
Interaction	HPRD:00087	Presenilin 1	0.00034095	12	53	MAPT, APP, APBA1, FLNB, SFRS2IP, GFAP, PKP4, GSK3B, PRKCZ, PIK3R1, NCSTN, JUP
Pathway	hsa04012	ErbB signaling pathway	0.000344454	15	87	ABL2, MAP2K4, PAK3, CAMK2B, NRG3, CAMK2A, CBL, SRC, GSK3B, GRB2, PRKCA, PRKCB, PLCG1, PIK3R1, JUN
Pathway	PW:0000578	scatter factor/hepatocyte growth factor signaling	0.000344482	5	11	CBL, SRC, GRB2, PLCG1, PIK3R1
GeneOntologyBiologicalProcess	GO:0048511	rhythmic process	0.000345998	21	173	SOD1, AGT, PGLYRP1, NRIP1, TEF, CCND2, HEBP1, GRIN1, GPRASP1, CRY1, CRH, PER1, CREB1, UBE3A, KCNMA1, JUN, INHBA, PTGDS, DRD2, NCOR1, EGR2
MousePheno	MP:0004994	abnormal brain wave pattern	0.000346823	11	42	SLC2A3, SCN1A, TEF, CACNB4, CACNA1A, GRIN1, PER1, UBE3A, CACNA2D2, KCNA1, KCNA2
MousePheno	MP:0000952	abnormal CNS glial cell morphology	0.000348871	27	168	MT3, SLC4A3, MBP, APP, ATP1A3, CADM1, GJA1, BCR, PAFAH1B1, GFAP, NCAM1, HTT, PEA15, PI4K2A, CNP, UGT8, IGF1R, ID4, NDST1, DAG1, CACNA2D2, GPR56, NCSTN, KCNA1, QKI, PSAP, MAPK8IP3
Interaction	HPRD:03857	Phospholipase D2	0.000368808	8	26	ACTN1, OPRM1, PIP5K1A, STXBP1, PEA15, PRKCA, PLCG1, DPYSL2
Interaction	HPRD:10441	Serine arginine repetitive matrix protein 1	0.000373744	4	6	FUS, SRRM1, YWHAG, SRRM2
Interaction	HPRD:07353	MARK	0.000373744	4	6	MAP2, MARK1, MAPT, TAOK1
Interaction	109314	Two-hybrid	0.000373744	4	6	AP2A2, HTT, GRB2, CREBBP
Interaction	110029	Reconstituted Complex	0.000373744	4	6	APP, KIF5A, KIF5B, KIF5C
Interaction	HPRD:09991	HSPBP1	0.000373744	4	6	HSPA8, HSPA1A, HSPA1B, C1orf103
Interaction	HPRD:06781	GluR delta 2	0.000376426	5	10	GRID2, GRIK5, MAGI2, DLG2, PTPN4
Interaction	HPRD:04090	APBA2	0.000376426	5	10	APP, STXBP1, CLSTN1, NRXN1, LRP1
GeneOntologyBiologicalProcess	GO:0050770	regulation of axonogenesis	0.000377345	12	72	MAP1B, MAPT, MBP, NTRK3, ULK1, CACNA1A, RTN4, GRIN1, RUFY3, METRN, LRRC4C, ISLR2
Interaction	HPRD:07543	TRAP150	0.000386468	3	3	SFRS12, YWHAG, THRAP3
Interaction	115593	Reconstituted Complex	0.000386468	3	3	APP, APLP2, APLP1
Interaction	110320	Biochemical Activity	0.000386468	3	3	BPTF, CSNK2A1, DCC
Interaction	HPRD:03396	ELAV like protein 2	0.000386468	3	3	ELAVL3, ELAVL2, ELAVL4
Interaction	111355	Affinity Capture-MS	0.000386468	3	3	MAP2, GRB2, PLEC
Interaction	HPRD:09662	DNA damage inducible transcript 4	0.000386468	3	3	DDIT4, HSPA4, C1orf103
Interaction	HPRD:17199	KIAA0913 protein	0.000386468	3	3	ATXN1, KIAA0913, ATN1
Interaction	HPRD:17098	HECT domain containing 1	0.000386468	3	3	HECTD1, YWHAG, IGSF1
Pathway	h_p38mapkPathway	p38 MAPK Signaling	0.000400292	9	37	MAP2K4, MAX, MEF2A, MAP3K7, GRB2, HSPB1, CREB1, ATF2, CREBBP
Pathway	h_eif4Pathway	Regulation of eIF4e and p70 S6 Kinase	0.000408143	7	23	PRKCA, PDPK1, CUX1, PIK3R1, PTEN, EIF4A1, EIF4G1
Pathway	P00041	Metabotropic glutamate receptor group I	0.000408143	7	23	GRM5, GRIN1, GRIK5, GRIN2C, PRKAR1B, PRKCB, HOMER1
GeneOntologyBiologicalProcess	GO:0048193	Golgi vesicle transport	0.000409105	18	139	NAPG, GBF1, AP2A1, SORT1, SEC24B, VAMP2, HTT, EXOC5, ERGIC1, HSPA8, DNAJC6, RAB6B, RAB14, CUX1, COPG2, GOSR2, RAB2A, PUM1
GeneOntologyBiologicalProcess	GO:0010001	glial cell differentiation	0.000409616	13	83	SOD1, SMARCA4, ADORA2A, AGT, RTN4, SOX11, POU3F1, PRPF19, ID4, METRN, DLX1, SOX8, EGR2
Pathway	NFATPATHWAY	NFATPATHWAY	0.000413301	11	53	AGT, MEF2C, CAMK1G, CAMK4, SYT1, GSK3B, PRKAR1B, PRKACB, CREBBP, PIK3R1, CSNK1A1
Interaction	117169	Two-hybrid	0.000416514	6	15	SMARCD1, FAM107A, NRIP1, FXR2, ABLIM1, ZBTB16
Interaction	111105	Affinity Capture-Western	0.000416514	6	15	MAPT, CAMK2A, HSPA8, HSPA1A, HSPA4, DLG4
Pathway	h_vdrPathway	Control of Gene Expression by Vitamin D Receptor	0.000429813	8	30	SMARCD1, SMARCA4, SRC, PRMT1, MED1, CREBBP, TSC2, NCOR1
Pathway	ERK5PATHWAY	ERK5PATHWAY	0.00043825	6	17	MEF2A, MEF2C, GRB2, CREB1, PLCG1, PIK3R1
Interaction	HPRD:05418	Glycogen synthase kinase 3 beta	0.000443312	14	70	SGK1, MAP1B, MAPT, APP, APC, CCND1, OGT, GSK3B, PRKCZ, PRKCB, CREB1, DNM1L, DPYSL2, MARK2
Pathway	PHOSPHATIDYLINOSITOL_SIGNALING_SYSTEM	PHOSPHATIDYLINOSITOL_SIGNALING_SYSTEM	0.000443938	15	89	CDS2, MAP3K10, OCRL, PIP4K2B, PRKCZ, PRKG1, PRKAR1B, PRKCA, PRKCB, PRKACB, CDK17, PLCG1, CSNK2A1, DGKB, PLCB1
GeneOntologyMolecularFunction	GO:0005096	GTPase activator activity	0.000445043	26	240	RGS9, GAPVD1, RABGAP1, ARHGAP5, ARHGDIB, RALGAPA1, BCR, RASAL1, SIPA1L1, MYO9A, TBC1D15, GPSM1, RGS5, RGS20, ARHGAP32, TSC2, TBC1D30, ARHGAP10, JUN, GIT1, RASAL2, ARHGAP26, EVI5, ACAP3, AGAP1, ARAP2
GeneOntologyBiologicalProcess	GO:0050690	regulation of defense response to virus by virus	0.000465331	4	8	AP2B1, AP2A2, AP2A1, ATP6V1H
Interaction	113364	Affinity Capture-MS	0.000490987	8	27	YWHAG, PRKCZ, PRKCA, PRKCB, IGF1R, KIF5B, KIF5C, MARK2
Interaction	HPRD:00226	Cadherin 2	0.00050091	7	21	GNA12, CDH11, GRIN1, ARHGAP32, CREBBP, PIK3R1, JUP
MousePheno	MP:0009749	enhanced behavioral response to addictive substance	0.000525398	9	31	ATP1A3, ATP1A1, NR4A2, OPRM1, CACNA1B, KCNC1, DLG4, HOMER2, HOMER1
MousePheno	MP:0000788	abnormal cerebral cortex morphology	0.000536805	33	227	ABL2, ADCY1, PPARGC1A, CDK5R2, EXT1, CDK5R1, MAP1B, MAP2, APBB2, DCLK1, ARHGAP5, CADM1, ATP2B2, ATRX, PAFAH1B1, LMO4, HTT, GRIN1, KLF7, VLDLR, UBE3A, TYRO3, ID4, DCX, DAG1, NUMBL, GPR56, NCSTN, KCNA1, MAPK8IP3, NEUROD6, EPHA4, CELSR3
GeneOntologyBiologicalProcess	GO:0010608	posttranscriptional regulation of gene expression	0.000540468	27	256	NAPG, PPARGC1A, ATXN2, APP, APBB2, APLP1, STXBP1, CPEB2, EIF3A, HSPB1, EIF2C2, DNAJC1, TRMT6, PRKCA, UBE2B, CPEB1, DDX25, QKI, USP7, PTEN, TNRC6B, UHMK1, ELAVL1, EIF4B, EIF4G1, EIF4EBP2, PUM1
MousePheno	MP:0001361	social withdrawal	0.000542241	4	6	MAP6, GRIN1, PPP3R1, NUMBL
Pathway	EIF4PATHWAY	EIF4PATHWAY	0.000544968	7	24	PRKCA, PRKCB, PDPK1, PIK3R1, PTEN, EIF4A1, EIF4G1
Interaction	HPRD:03333	Ataxin 1	0.000547442	24	160	MBP, ATXN1, ATXN2, ATP1A3, NUDT21, ZNF804A, KCNAB2, ARHGAP32, HSPA1A, NR4A1, YWHAZ, NLK, NUMBL, ANP32A, RBM9, CPSF7, USP7, KIAA0913, PTGDS, BAT2, GPATCH8, NCOR1, DZIP3, PUM1
MousePheno	MP:0004077	abnormal striatum morphology	0.000550563	12	51	RGS9, SNCB, PPARGC1A, CDK5R1, DCLK1, LHX8, DLGAP3, HTT, GRIN1, DCX, DLG4, QKI
Interaction	HPRD:07185	Thyroid hormone receptor alpha	0.000554146	9	34	MEF2A, FUS, CCND1, HDAC2, SRC, MED1, CREB1, CREBBP, NCOR1
GeneOntologyMolecularFunction	GO:0030955	potassium ion binding	0.000564637	17	131	KCNQ5, SCN1A, ATP1A3, ATP1A1, ATP1B2, KCNAB2, TMEM38A, KCNMA1, KCNQ2, KCNQ1, KCNJ4, KCNC1, KCNB1, KCNA1, KCNA2, KCNH3, SLC12A5
GeneOntologyMolecularFunction	GO:0017124	SH3 domain binding	0.000569863	15	108	MAPT, USP8, GJA1, PAK3, SHANK3, CBL, CNTNAP1, KHDRBS1, RAPGEF1, DNAJC6, ELMO1, ZFP106, QKI, ARHGAP26, DPYSL3
GeneOntologyMolecularFunction	GO:0005010	insulin-like growth factor receptor activity	0.000571303	3	4	CRIM1, IGF2R, IGF1R
GeneOntologyBiologicalProcess	GO:0060087	relaxation of vascular smooth muscle	0.000573136	3	4	SOD1, GUCY1A3, KCNMA1
GeneOntologyMolecularFunction	GO:0008017	microtubule binding	0.000576334	13	86	MAP1B, MAP6, MAPT, APC, ARHGEF2, PAFAH1B1, DST, APC2, HTT, DCX, KIF5B, KIF1B, HOOK3
GeneOntologyCellularComponent	GO:0015629	actin cytoskeleton	0.000582657	29	289	ABL2, FSCN1, ACTN1, WASL, FLNB, CAP1, CORO2B, TNNT1, DST, STX1A, GAS7, MYO9A, SPTBN1, RHOU, ARHGAP32, RPH3A, PRKCZ, ARPC3, ACTR1A, TPM1, DAG1, DBN1, JUP, SYNPO, ABLIM1, EPB41, LASP1, ARC, ABLIM2
MousePheno	MP:0009758	impaired behavioral response to cocaine	0.000588747	5	10	AQP4, GRM5, GRIN1, GPRASP1, DLG4
MousePheno	MP:0002862	altered righting response	0.000593415	19	105	DNAJC5, MAP2K4, SCN1A, APP, APLP2, ATP2B2, ATP1B2, NR4A2, B4GALNT1, GABRB3, DST, PBX3, CACNB4, CACNA1A, ATCAY, GRIN1, ZIC1, CHD7, KCNQ1
Pathway	hsa04020	Calcium signaling pathway	0.000593496	24	184	SLC8A1, ADCY3, ADCY1, ADORA2A, CACNA1G, ATP2B2, ATP2B1, CAMK2B, CAMK4, CAMK2A, CACNA1B, CACNA1A, CACNA1D, GRM5, GRIN1, GRIN2C, CHRM1, PRKCA, PRKCB, PRKACB, PPP3R1, PDE1A, PLCG1, PLCB1
GeneOntologyBiologicalProcess	GO:0007632	visual behavior	0.000597527	8	37	SGK1, SLC1A2, ATXN1, APP, ATP1A3, HTT, GRIN1, DRD2
Pathway	hsa04310	Wnt signaling pathway	0.000602269	21	152	APC, FZD2, CCND1, APC2, CAMK2B, CAMK2A, CCND2, TBL1X, MAP3K7, GSK3B, PRICKLE1, PRKCA, PRKCB, PRKACB, PPP3R1, NLK, CREBBP, CSNK2A1, CSNK1A1, JUN, PLCB1
Pathway	BIOPEPTIDESPATHWAY	BIOPEPTIDESPATHWAY	0.000608397	9	39	AGT, MAPT, CAMK2B, CAMK2A, SYT1, GRB2, PRKCA, PRKCB, PLCG1
MousePheno	MP:0009937	abnormal neuron differentiation	0.000613048	34	238	ABL2, CDK5R2, MAP2K4, EXT1, CDK5R1, MAP1B, MAPT, APBB2, DCLK1, FKBP8, GJA1, BCR, PAFAH1B1, GPHN, GFAP, PBX3, NCAM1, RTN4, KLF7, ARHGAP32, ID4, NUMBL, DCC, GPR56, NR4A3, PTEN, MAPK8IP3, EPHA4, NCOR1, ELAVL4, EGR2, PTPRF, CELSR3, PTPRS
Pathway	PW:0000674		0.000622343	6	18	STXBP1, STX1A, VAMP2, CACNA1A, CACNA1D, KCNB1
Pathway	CCR5PATHWAY	CCR5PATHWAY	0.000622343	6	18	FOS, SYT1, PRKCA, PRKCB, PLCG1, JUN
Pathway	CARDIACEGFPATHWAY	CARDIACEGFPATHWAY	0.000622343	6	18	AGT, FOS, PRKCA, PRKCB, PLCG1, JUN
MousePheno	MP:0003107	abnormal response to novelty	0.000623221	21	122	ABL2, EHMT2, ADORA2A, PDE10A, CPLX2, MAP1B, ATXN1, APP, ATP1A1, NIPAL3, HTT, GSK3B, AAAS, KCNC1, RORB, DNMT3A, QKI, PTEN, DRD2, ARHGEF9, PTPRF
GeneOntologyCellularComponent	GO:0017053	transcriptional repressor complex	0.000624106	9	47	JAZF1, HDAC2, TBL1X, CSNK2A1, RBBP4, ARID4A, CBX5, NCOR1, ZBTB16
Interaction	HPRD:09260	DAP1	0.000625591	6	16	APC, DLGAP3, GRIN2C, DLGAP2, DLG2, DLG4
Interaction	HPRD:03879	MINT1	0.000625591	6	16	APP, APBA1, STXBP1, STX1A, CACNA1B, NRXN1
Interaction	HPRD:04087	Amyloid beta A4 precursor protein binding, family B, member 1	0.000625591	6	16	ATXN1, APP, APLP2, APLP1, CLSTN1, LRP1
Interaction	HPRD:01796	Transcription factor Sp1	0.000626158	16	89	MEF2C, CCND1, BCL6, HCFC1, OGT, HTT, HDAC2, SREBF2, HSPA8, KLF6, CSNK2A1, RBBP4, JUN, SOX8, NCOR1, ZBTB16
Interaction	108636	Reconstituted Complex; Two-hybrid	0.000648817	5	11	FOS, ATF2, CREBBP, CSNK2A1, TSC22D3
Interaction	HPRD:02956	Protein tyrosine phosphatase receptor type E	0.000648817	5	11	SRC, GRB2, KCNB1, PTPRD, PTPRS
Interaction	HPRD:01839	Tropomyosin 1 alpha chain	0.000648817	5	11	TNNT1, TMOD2, TPM1, JUN, EPB41
Interaction	HPRD:04392	Liprin alpha 2	0.000648817	5	11	ERC2, GIT1, PTPRD, PTPRF, PTPRS
Interaction	HPRD:16025	Embryonic lethal abnormal vision like 1	0.000648817	5	11	SFRS12, KPNA1, ANP32A, ELAVL1, TNPO1
MousePheno	MP:0000857	abnormal cerebellar foliation	0.000676643	16	82	CDK5R2, CDK5R1, MAP1B, DCLK1, MID1, GJA1, BCR, CCND1, CCND2, NFIB, GRID2, ZIC1, VLDLR, DNM1L, DCX, PTEN
GeneOntologyBiologicalProcess	GO:0016055	Wnt receptor signaling pathway	0.000682746	21	182	FBXW2, APC, CCNY, FZD2, TLE1, CCND1, APC2, TBL1X, GSK3B, ZEB2, NLK, CDK14, UBE2B, TSC2, CSNK2A1, CSNK1A1, CSNK1G1, JUP, LRP1, DRD2, CELSR2
Interaction	HPRD:02092	Ribosomal protein S6 kinase alpha 3	0.000688904	7	22	MAPT, PEA15, GRIN1, NR4A1, CREB1, CREBBP, PDPK1
GeneOntologyBiologicalProcess	GO:0043242	negative regulation of protein complex disassembly	0.000709987	9	47	MAP1B, MAP1A, MAP2, MAPT, APC, MID1, ARHGEF2, SPTBN1, TPM1
GeneOntologyBiologicalProcess	GO:0050885	neuromuscular process controlling balance	0.000722083	8	38	APP, APLP2, ATP2B2, PAFAH1B1, CACNA1A, GRIN2C, KCNMA1, NR4A3
GeneOntologyBiologicalProcess	GO:0030004	cellular monovalent inorganic cation homeostasis	0.000722083	8	38	SGK1, AGT, ATP1A3, ATP1A1, TMPRSS3, ATP6V1H, KCNMA1, SLC12A5
GeneOntologyBiologicalProcess	GO:0051046	regulation of secretion	0.00073017	29	288	ADORA2A, CACNA1G, AGT, IL1RAPL1, ACVR1C, GABBR1, CADM1, STXBP1, STX1A, CAMK2A, VAMP2, CACNA1B, CACNA1A, SYT1, RTN4, SRC, GRIK5, DNAJC1, PRKCA, PRKCB, CRH, CREB1, CHD7, KCNQ1, INHBA, EDN3, DRD2, DPYSL2, RAB27B
GeneOntologyCellularComponent	GO:0005905	coated pit	0.000733099	9	48	AP2B1, AP2A2, AP2A1, SORT1, APP, RAMP2, TFRC, VLDLR, LRP1
GeneOntologyMolecularFunction	GO:0019902	phosphatase binding	0.000746742	10	57	SOD1, CARHSP1, STRN3, NCAM1, MAGI2, PPP2R4, RCAN2, PIK3R1, SBF2, JUP
GeneOntologyBiologicalProcess	GO:0017157	regulation of exocytosis	0.000752875	10	57	CACNA1G, IL1RAPL1, STXBP1, STX1A, VAMP2, CACNA1A, SYT1, GRIK5, PRKCA, RAB27B
GeneOntologyBiologicalProcess	GO:0006887	exocytosis	0.000763724	20	171	VPS33A, CACNA1G, CPLX2, IL1RAPL1, MIA3, DOC2B, STXBP1, STX1A, VAMP2, CACNA1A, SYT1, EXOC5, GRIK5, RPH3A, PEX5L, PI4K2A, YWHAZ, PRKCA, RAB27B, RIMS2
GeneOntologyCellularComponent	GO:0045121	membrane raft	0.000774966	21	187	SLC8A1, ADCY3, SLC2A3, GABBR1, FLOT2, ATP1A1, GJA1, OPRM1, CBL, NEDD4, SRC, GSK3B, PI4K2A, PRKCZ, PRKCA, IGF1R, TSC2, DAG1, KCNMA1, DCC, GRIP1
GeneOntologyBiologicalProcess	GO:0048588	developmental cell growth	0.000789487	6	22	MAP1B, APP, DCLK1, ULK1, DCX, ISLR2
GeneOntologyBiologicalProcess	GO:0006898	receptor-mediated endocytosis	0.000796809	12	78	CAP1, ULK1, RAMP2, CBL, NEDD4, GRB2, PRKCA, LRP1B, IGF2R, SYNE1, LRP1, DRD2
Pathway	hsa04720	Long-term potentiation	0.000801461	13	75	ADCY1, CAMK2B, CAMK4, CAMK2A, GRM5, GRIN1, GRIN2C, PRKCA, PRKCB, PRKACB, PPP3R1, CREBBP, PLCB1
GeneOntologyBiologicalProcess	GO:0047496	vesicle transport along microtubule	0.000802416	4	9	PAFAH1B1, HTT, PRKCZ, KIF5B
GeneOntologyMolecularFunction	GO:0008066	glutamate receptor activity	0.000802651	7	30	GABBR1, GRM3, GRM5, GRID2, GRIN1, GRIK5, GRIN2C
GeneOntologyBiologicalProcess	GO:0050769	positive regulation of neurogenesis	0.000812126	13	89	SGK1, MAP1B, MAPT, NTRK3, RTN4, GRM5, PRPF19, METRN, NUMBL, ISLR2, DRD2, NPTN, PTPRF
GeneOntologyBiologicalProcess	GO:0090066	regulation of anatomical structure size	0.000850489	19	160	ADORA2A, SGK1, CACNA1G, AGT, EXTL3, MAP1B, MAPT, APP, DCLK1, ARHGAP5, ATP2B2, ULK1, RTN4, HSPA1B, CREB1, TPM1, DCX, KCNMA1, ISLR2
MousePheno	MP:0000852	small cerebellum	0.000850636	19	108	CDK5R2, CDK5R1, ANK3, APP, DCLK1, ATP2B2, GJA1, CCND1, CACNA1A, CCND2, GRID2, ZIC1, VLDLR, UBE3A, DNM1L, DCX, CACNA2D2, PSAP, EPB41L1
Pathway	NGFPATHWAY	NGFPATHWAY	0.000861165	6	19	FOS, GRB2, PLCG1, PIK3R1, CSNK2A1, JUN
Pathway	CBLPATHWAY	CBLPATHWAY	0.000862325	5	13	CBL, SRC, GRB2, PRKCA, PRKCB
GeneOntologyBiologicalProcess	GO:0035249	synaptic transmission, glutamatergic	0.000866708	8	39	ADORA2A, CACNB4, CACNA1A, GRM3, GRID2, GRIN1, GRIK5, DRD2
MousePheno	MP:0009538	abnormal synapse morphology	0.000891294	16	84	DNAJC5, MAP6, APP, APLP2, KIF1A, SLC17A7, GPHN, CAMK2A, CACNB4, GRID2, DAG1, CACNA2D2, SYNE1, DNMT3A, KIF1B, EGR2
MousePheno	MP:0004742	abnormal vestibular system physiology	0.000905225	22	134	MAP6, SCN1A, MBP, APP, APLP2, ATP2B2, BCR, GABRB3, CACNB4, CACNA1A, GRID2, POU3F4, ATF2, CHD7, NUMBL, KCNMA1, KCNQ1, NR4A3, QKI, PSAP, DRD2, RAD23B
MousePheno	MP:0001408	stereotypic behavior	0.000905225	22	134	MAP6, SCN1A, MAPT, APP, APLP2, ATP2B2, BCR, NR4A2, GABRB3, CACNB4, CACNA1A, GRIN1, POU3F4, ATF2, CHD7, NUMBL, KCNMA1, KCNQ1, NR4A3, PSAP, DRD2, RAD23B
GeneOntologyCellularComponent	GO:0030666	endocytic vesicle membrane	0.000919985	8	40	AP2B1, AP2A2, AP2A1, CAMK2B, CAMK2A, SYT1, DLG4, CACNG4
MousePheno	MP:0000790	abnormal stratification in cerebral cortex	0.000925421	8	27	CDK5R1, MAP1B, MAP2, DCLK1, PAFAH1B1, ID4, DCX, DAG1
Pathway	h_botulinPathway	Blockade of Neurotransmitter Relase by Botulinum Toxin	0.000979796	3	4	STX1A, VAMP2, CHRM1
GeneOntologyBiologicalProcess	GO:0048169	regulation of long-term neuronal synaptic plasticity	0.000996077	7	31	AGT, SYNGR1, GRM5, GRIN1, DLG4, DRD2, NPTN
GeneOntologyBiologicalProcess	GO:0030518	steroid hormone receptor signaling pathway	0.00100306	12	80	PPARGC1A, PMEPA1, NRIP1, KLF9, STRN3, NEDD4, SRC, MED1, THRAP3, UBE3A, GRIP1, RBM9
MousePheno	MP:0004716	abnormal cochlear nerve morphology	0.00100849	5	11	SOD1, ATP2B2, NTRK3, GABRB3, CACNA1D
GeneOntologyBiologicalProcess	GO:0009968	negative regulation of signal transduction	0.00101125	29	294	RGS9, AGT, SCAI, ATXN1, STRAP, APC, DDIT4, TIMP2, TLE1, CCND1, BCL6, STRN3, RGS5, NEDD4, RGS20, GRB10, PRKCZ, PRKCA, NLK, IGF1R, TAOK3, TSC2, HIPK2, MAPK8IP1, LRP1, PTEN, DRD2, NCOR1, PTPRF
GeneOntologyBiologicalProcess	GO:0007214	gamma-aminobutyric acid signaling pathway	0.00102058	6	23	GABRA2, GABBR1, GABRB2, GABRB3, CACNB4, CACNA1A
GeneOntologyBiologicalProcess	GO:0046626	regulation of insulin receptor signaling pathway	0.00102058	6	23	SRC, GRB10, PRKCZ, PRKCA, TSC2, PTPRF
GeneOntologyBiologicalProcess	GO:0009914	hormone transport	0.00102112	20	175	ACVR2B, ADORA2A, AGT, NISCH, ACVR1C, GABBR1, STX1A, HTT, RTN4, RPH3A, YWHAZ, PRKCB, CRH, CREB1, CHD7, KCNQ1, INHBA, EDN3, DRD2, RIMS2
GeneOntologyBiologicalProcess	GO:0048675	axon extension	0.00103367	8	40	MAP1B, MAPT, DCLK1, NTRK3, ULK1, RTN4, DCX, ISLR2
MousePheno	MP:0008227	absent anterior commissure	0.0010402	6	16	EXT1, DCLK1, KLF7, DCX, EPHA4, CELSR3
MousePheno	MP:0000606	decreased hepatocyte number	0.0010402	6	16	MAP2K4, SCP2, RB1CC1, JARID2, LRP1, BIRC6
GeneFamily	KLF	Kruppel-like factors	0.00104432	4	17	KLF9, KLF7, KLF6, KLF12
GeneOntologyBiologicalProcess	GO:0048011	nerve growth factor receptor signaling pathway	0.0011156	5	16	AGT, SORT1, ULK1, SRC, PTPRF
GeneOntologyBiologicalProcess	GO:0051590	positive regulation of neurotransmitter transport	0.0011156	5	16	ADORA2A, STX1A, CACNA1B, DRD2, DPYSL2
GeneOntologyBiologicalProcess	GO:0007613	memory	0.00113852	10	60	ADCY1, SGK1, ATP1A3, GRIN1, PRKCZ, VLDLR, CRH, PTEN, DRD2, PLCB1
GeneOntologyBiologicalProcess	GO:0006417	regulation of translation	0.00114623	19	164	ATXN2, APP, APLP1, CPEB2, EIF3A, HSPB1, EIF2C2, DNAJC1, TRMT6, PRKCA, CPEB1, DDX25, QKI, TNRC6B, UHMK1, EIF4B, EIF4G1, EIF4EBP2, PUM1
MousePheno	MP:0005292	improved glucose tolerance	0.00116125	16	86	PPARGC1A, ZBTB20, PPM1L, OPRM1, CACNA1B, CBL, CAMKK2, GSK3B, ATF2, CREBBP, PDPK1, TSC2, PIK3R1, KCNB1, CXCL14, MARK2
Pathway	h_arenrf2Pathway	Oxidative Stress Induced Gene Expression Via Nrf2	0.00116484	6	20	FOS, KEAP1, PRKCA, CREB1, CREBBP, JUN
Pathway	IGF1PATHWAY	IGF1PATHWAY	0.00116484	6	20	FOS, GRB2, IGF1R, PIK3R1, CSNK2A1, JUN
GeneOntologyMolecularFunction	GO:0030674	protein binding, bridging	0.00117321	14	104	FSCN1, FLRT2, STX1A, IRS4, CNTNAP1, KHDRBS1, SRC, GRB10, GRB2, RAPGEF1, CUX1, SYNM, CBX5, LASP1
MousePheno	MP:0003008	enhanced long term potentiation	0.00117523	10	41	NRGN, GFAP, CAMK2A, HDAC2, NELL2, TSC2, DLG4, ARHGEF9, PTPRD, ARC
MousePheno	MP:0009718	absent Purkinje cell layer	0.00118496	4	7	CDK5R2, CDK5R1, CCND1, CCND2
MousePheno	MP:0004807	abnormal paired-pulse inhibition	0.00118496	4	7	CACNA1A, NRXN3, NRXN2, NRXN1
MousePheno	MP:0002807	abnormal eye blink conditioning behavior	0.00118496	4	7	GMFB, GFAP, KCNMA1, PTPN4
GeneOntologyCellularComponent	GO:0030673	axolemma	0.00119785	4	10	ADORA2A, SLC1A2, GABBR1, MAPK8IP3
MousePheno	MP:0001900	impaired synaptic plasticity	0.00120607	8	28	ADCY1, CPLX2, KSR1, MAP6, SYNGR1, NRGN, GRIN1, VLDLR
GeneOntologyBiologicalProcess	GO:0015807	L-amino acid transport	0.00121728	7	32	SLC1A2, APBA1, GABBR1, CACNB4, CACNA1A, HTT, SLC7A5
GeneOntologyBiologicalProcess	GO:0042752	regulation of circadian rhythm	0.00121728	7	32	PGLYRP1, GPRASP1, CRH, PER1, CREB1, PTGDS, DRD2
MousePheno	MP:0001362	abnormal anxiety-related response	0.0012595	26	173	EHMT2, PPARGC1A, NPAS4, ADORA2A, CPLX2, SLC2A3, MAP6, MAPT, APP, GABBR1, FOS, ATP1A1, SLC17A7, GAD2, CAMK2A, DLGAP3, CACNA1B, GRIN1, IDS, SYNPO, GIT1, RASD2, NPEPPS, PSAP, DRD2, ARHGEF9
Pathway	TRKAPATHWAY	TRKAPATHWAY	0.00127174	5	14	GRB2, PRKCA, PRKCB, PLCG1, PIK3R1
Pathway	h_trkaPathway	Trka Receptor Signaling	0.00127174	5	14	GRB2, PRKCA, CUX1, PLCG1, PIK3R1
GeneOntologyBiologicalProcess	GO:0014051	gamma-aminobutyric acid secretion	0.0012813	4	10	APBA1, GABBR1, CACNB4, CACNA1A
GeneOntologyBiologicalProcess	GO:0035235	ionotropic glutamate receptor signaling pathway	0.0012813	4	10	CDK5R1, APP, ATP1A3, GRIN1
GeneOntologyBiologicalProcess	GO:0060134	prepulse inhibition	0.0012813	4	10	ADORA2A, GRID2, GRIN1, DRD2
Pathway	insulin_pathway	Insulin Pathway	0.00128949	9	43	SGK1, CBL, EXOC5, GRB10, GRB2, RAPGEF1, PRKCZ, PDPK1, PIK3R1
GeneOntologyBiologicalProcess	GO:0048538	thymus development	0.00130027	6	24	SOD1, APC, PBX1, CACNB4, BCL11B, JARID2
GeneOntologyBiologicalProcess	GO:0007622	rhythmic behavior	0.00130027	6	24	PGLYRP1, CRH, KCNMA1, PTGDS, DRD2, EGR2
Pathway	P00033	Insulin/IGF-protein kinase B signaling cascade	0.00130398	8	35	IRS4, GSK3B, IGF2R, PDPK1, IGF1R, TSC2, PIK3R1, PTEN
GeneOntologyBiologicalProcess	GO:0008016	regulation of heart contraction	0.00136347	13	94	SLC8A1, CACNA1G, ATP1A1, GJA1, CACNA1B, CELF2, PRKCA, CTGF, TPM1, KCNQ1, EDN3, DRD2, EPAS1
GeneOntologyBiologicalProcess	GO:0000320	re-entry into mitotic cell cycle	0.00137611	3	5	CCND1, GSK3B, CTGF
MousePheno	MP:0001501	abnormal sleep pattern	0.00137754	9	35	CACNA1G, MAP6, GABBR1, FOS, DLGAP3, CACNA1B, PER1, UBE3A, KCNA2
GeneOntologyBiologicalProcess	GO:0046323	glucose import	0.00144433	8	42	SLC1A2, SLC2A3, SORT1, PEA15, GRB10, PRKCZ, PRKCA, PIK3R1
MousePheno	MP:0004998	decreased CNS synapse formation	0.00149975	6	17	GRID2, DNM1L, NCSTN, NRXN3, NRXN2, NRXN1
GeneOntologyBiologicalProcess	GO:0030865	cortical cytoskeleton organization	0.00151187	5	17	ACTN1, SYNPO, EPB41, EPB41L1, LASP1
Pathway	h_TPOPathway	TPO Signaling	0.00154419	6	21	FOS, GRB2, PRKCA, PLCG1, CSNK2A1, JUN
Pathway	h_igf1rPathway	Multiple antiapoptotics from IGF-1R signaling lead to BAD phosphorylation	0.00154419	6	21	ADCY1, GRB2, PRKAR1B, IGF1R, CUX1, PIK3R1
MousePheno	MP:0000792	abnormal cortical marginal zone morphology	0.00155055	8	29	CDK5R2, CDK5R1, APBB2, VLDLR, NUMBL, GPR56, MAPK8IP3, CELSR3
MousePheno	MP:0000781	decreased corpus callosum size	0.00155055	8	29	MAP2K4, CDK5R1, MAP1B, APP, DCLK1, ARHGAP5, GFAP, DCX
MousePheno	MP:0000794	abnormal parietal lobe morphology	0.00155055	8	29	ADCY1, MAP1B, APBB2, LMO4, GRIN1, MAPK8IP3, NEUROD6, EPHA4
Pathway	botulinumtoxinpathway	Effects of Botulinum toxin	0.00158515	4	9	STXBP1, STX1A, VAMP2, SYT1
Pathway	h_HBxPathway	Calcium Signaling by HBx of Hepatitis B virus	0.00158515	4	9	SRC, GRB2, CREB1, CREBBP
MousePheno	MP:0008223	absent hippocampal commissure	0.00161553	5	12	EXT1, MAP1B, DCLK1, DCX, DCC
MousePheno	MP:0003477	abnormal nerve fiber response	0.00161553	5	12	GAD2, CACNA1A, GRM5, KCNMA1, KCNA1
Pathway	P04394	Thyrotropin-releasing hormone receptor signaling	0.00163185	10	53	GNG4, VAMP2, CACNB4, CACNA1B, CACNA1A, CACNB1, PRKCZ, PRKCA, PRKCB, PLCG1
GeneOntologyBiologicalProcess	GO:0018107	peptidyl-threonine phosphorylation	0.0016349	6	25	MAP2, SBK1, PRKCA, NLK, PDPK1, HIPK3
Pathway	WNT_SIGNALING	WNT_SIGNALING	0.0016391	11	62	FBXW2, APC, FZD2, CCND1, PAFAH1B1, CCND2, GSK3B, PRKCZ, PRKCA, PRKCB, JUN
MousePheno	MP:0002891	increased insulin sensitivity	0.00164135	17	97	PPARGC1A, ZBTB20, PIP4K2B, PBX1, CACNA1D, CBL, GRB10, CRY1, ATF2, CREBBP, PDPK1, IGF1R, TSC2, PIK3R1, CXCL14, NCOR1, MARK2
GeneOntologyMolecularFunction	GO:0019900	kinase binding	0.00164241	24	235	SGK1, MAP2K4, SLC2A3, KSR1, MAPT, MEF2A, APC, CCND1, CCND2, SRC, PEA15, GSK3B, YWHAG, PRKCZ, PDPK1, IGF1R, TYRO3, PIK3R1, JUP, TAOK1, MAPK8IP1, KIDINS220, ATN1, MAPK8IP3
GeneOntologyCellularComponent	GO:0005875	microtubule associated complex	0.0016634	16	134	MAP1B, MAP1A, MAP2, MAPT, RABGAP1, MID1, KIF1A, PAFAH1B1, EML2, PEA15, ACTR1A, DCX, KIF5A, KIF5B, KIF5C, KIF1B
GeneOntologyBiologicalProcess	GO:0000377	RNA splicing, via transesterification reactions with bulged adenosine as nucleophile	0.00175214	19	170	SNRPD3, SNRNP70, SFRS8, SFPQ, FUS, SFRS2IP, NUDT21, SRRM1, RBM25, CELF2, TRA2A, SRPK2, TGS1, PRPF19, RSRC1, HNRNPR, RBM5, SF3B1, CPSF7
MousePheno	MP:0001436	abnormal suckling behavior	0.00175663	18	106	FUS, FKBP8, ATRX, GJA1, NR4A2, CCND1, GPHN, OGT, SYT1, BCL11B, GRID2, GRIN1, ZIC1, CNTFR, IGF2R, DCC, JAK1, INHBA
GeneOntologyMolecularFunction	GO:0047485	protein N-terminus binding	0.0018062	13	97	SMARCA4, STXBP1, STX1A, EXOC5, GRIN2C, HSPA1B, PLEC, CSNK2A1, TPM1, KCNQ2, KIAA0892, KCNB1, SRRM2
Pathway	MYOSINPATHWAY	MYOSINPATHWAY	0.00180871	5	15	ARHGAP5, GNA12, PRKCA, PRKCB, PLCB1
Pathway	h_erk5Pathway	Role of Erk5 in Neuronal Survival	0.00180871	5	15	MEF2A, GRB2, CREB1, CREBBP, PLCG1
GeneOntologyMolecularFunction	GO:0003682	chromatin binding	0.00184924	21	197	SMARCA4, CHD9, ATRX, TLE1, BCL6, ZEB1, TBL1X, SREBF2, CHD2, MED1, CREBBP, CHD7, CUX1, KDM5A, ARID4A, JARID2, SF3B1, DNMT3A, CBX5, DLX1, FOXP1
Pathway	reg_gr_pathway	Glucocorticoid receptor regulatory network	0.00187851	13	82	SMARCD1, SMARCA4, SGK1, CDK5R1, FOS, PBX1, HDAC2, GSK3B, NR4A1, PRKACB, CREB1, CREBBP, JUN
Pathway	P00026	Heterotrimeric G-protein signaling-Gi alpha and Gs alpha mediated	0.0018798	19	144	RGS9, ADCY3, ADORA2A, ADRA2C, ADRBK2, GNG4, OPRK1, GPSM1, RGS5, GRM3, RGS20, GRM5, GSK3B, CHRM1, PRKAR1B, CREB1, CREBBP, GNG13, DRD2
Pathway	P00042	Muscarinic acetylcholine receptor 1 and 3 signaling	0.0018914	10	54	GNG4, STX1A, VAMP2, GRIN1, GRIN2C, CHRM1, PRKCZ, PRKCA, PRKCB, KCNQ2
Pathway	fgf_pathway	FGF signaling pathway	0.0018914	10	54	FOS, CAMK2A, NCAM1, CBL, SRC, GRB2, PDPK1, PLCG1, PIK3R1, JUN
MousePheno	MP:0003460	decreased fear-related response	0.00196861	8	30	ADCY1, MAP2, APP, GABBR1, NR4A2, GIT1, FXR2, ARC
GeneOntologyBiologicalProcess	GO:0014066	regulation of phosphoinositide 3-kinase cascade	0.00200267	5	18	AGT, NEDD4, UBE3A, TSC2, NCOR1
GeneOntologyCellularComponent	GO:0031256	leading edge membrane	0.00200637	9	55	ADORA2A, SLC1A2, GABBR1, OPRM1, TPM1, KCNB1, MAPK8IP3, SLC12A5, WWC1
Pathway	GLEEVECPATHWAY	GLEEVECPATHWAY	0.00201069	6	22	MAP2K4, FOS, BCR, GRB2, PIK3R1, JUN
Pathway	PTDINSPATHWAY	PTDINSPATHWAY	0.00201069	6	22	AP2A1, GSK3B, PRKCZ, PFKP, PDPK1, PLCG1
GeneOntologyBiologicalProcess	GO:0016079	synaptic vesicle exocytosis	0.00203108	6	26	CPLX2, STXBP1, STX1A, VAMP2, GRIK5, RPH3A
GeneOntologyBiologicalProcess	GO:0033673	negative regulation of kinase activity	0.00204172	14	110	WNK1, ADORA2A, APC, GSK3B, PDCD4, YWHAG, PRKCA, PDPK1, TSC2, HIPK3, DBNDD2, SPRED2, MAPK8IP1, DUSP8
GeneOntologyCellularComponent	GO:0030139	endocytic vesicle	0.00208359	11	77	AP2B1, AP2A2, AP2A1, CAMK2B, CAMK2A, SYT1, IGF2R, DLG4, DRD2, CACNG4, RAB5C
GeneOntologyBiologicalProcess	GO:0050432	catecholamine secretion	0.00211704	7	35	ADORA2A, AGT, NISCH, GABBR1, RTN4, PRKCB, DRD2
Pathway	hsa04540	Gap junction	0.00211712	14	93	ADCY3, ADCY1, TUBB2B, GJA1, GUCY1A3, SRC, GRM5, GRB2, PRKG1, PRKCA, PRKCB, PRKACB, DRD2, PLCB1
Pathway	TCRPATHWAY	TCRPATHWAY	0.00212491	9	46	MAP2K4, FOS, SYT1, GRB2, PRKCA, PRKCB, PLCG1, PIK3R1, JUN
MousePheno	MP:0000885	ectopic Purkinje cell	0.00214346	7	24	CDK5R1, MID1, CCND1, PAFAH1B1, CCND2, ATF2, PTEN
MousePheno	MP:0003122	maternal imprinting	0.00214346	7	24	DLK1, SGCE, MEG3, PEG3, IGF2R, IGF1R, ARID4A
MousePheno	MP:0009711	abnormal conditioned place preference behavior	0.00214346	7	24	FOS, OPRM1, CAMK4, CACNA1B, GRIN1, HOMER2, HOMER1
MousePheno	MP:0003990	decreased neurotransmitter release	0.00214346	7	24	VAMP2, CACNA1A, LPHN1, CACNA2D2, NRXN3, NRXN2, NRXN1
MousePheno	MP:0002826	tonic seizures	0.00214346	7	24	SCN1A, CACNB4, CNP, CACNA2D2, KCNA2, QKI, PSAP
MousePheno	MP:0009046	muscle twitch	0.00215163	12	59	PPARGC1A, NPAS4, SGCE, DST, GAD2, CACNB4, CACNA1A, ATCAY, CNTNAP1, GRID2, CACNA2D2, KCNC1
MousePheno	MP:0001968	abnormal touch/ nociception	0.00219465	27	189	ADCY1, CDK5R2, ADORA2A, CDK5R1, MAP1B, GABBR1, KIF1A, OPRK1, OPRM1, SLC17A7, DST, PBX3, CAMK4, CACNA1B, CACNA1A, GRIK5, KLF7, PRKAR1B, PCSK2, KCNA1, DLG2, DLG4, KIF1B, PTGDS, NPEPPS, FXR2, SLC12A5
Pathway	p38alphabetadownstreampathway	Signaling mediated by p38-alpha and p38-beta	0.00228937	8	38	PPARGC1A, MEF2A, MEF2C, HSPB1, CREB1, ATF2, CSNK2A1, JUN
Pathway	HDACPATHWAY	HDACPATHWAY	0.00229722	7	30	MEF2A, MEF2C, CAMK1G, SYT1, HDAC5, IGF1R, PIK3R1
Pathway	igf1_pathway	IGF1 pathway	0.00229722	7	30	GRB10, GRB2, YWHAZ, PRKCZ, PDPK1, IGF1R, PIK3R1
Pathway	h_iresPathway	Internal Ribosome entry	0.0023335	3	5	EIF3A, EIF4A1, EIF4G1
Pathway	IONPATHWAY	IONPATHWAY	0.0023335	3	5	PRKCA, PRKCB, PLCG1
Pathway	PW:0000543	protein kinase A (PKA) signaling	0.00248342	9	47	ADCY3, ADCY1, PDE10A, AKAP2, PRKAR1B, PRKACB, PDE1A, PDE4B, AKAP9
Pathway	CDMACPATHWAY	CDMACPATHWAY	0.00249469	5	16	FOS, PRKCA, PRKCB, JUN, PLCB1
GeneOntologyCellularComponent	GO:0032590	dendrite membrane	0.00251001	3	6	OPRM1, KCNB1, SLC12A5
Pathway	G_PROTEIN_SIGNALING	G_PROTEIN_SIGNALING	0.00259623	14	95	ADCY3, ADCY1, AKAP2, GNG4, GNA12, PRKCZ, PRKAR1B, PRKCA, PRKCB, PRKACB, PDE1A, PDE4B, AKAP9, GNG13
GeneOntologyCellularComponent	GO:0032839	dendrite cytoplasm	0.00259637	4	12	SOD1, MAP2K4, OPRM1, UHMK1
GeneOntologyCellularComponent	GO:0000118	histone deacetylase complex	0.00272613	8	47	NRIP1, HDAC2, TBL1X, HDAC5, CSNK2A1, RBBP4, CBX5, NCOR1
Pathway	nephrin_neph1_pathway	Nephrin/Neph1 signaling in the kidney podocyte	0.00280755	7	31	MAP2K4, WASL, GRB2, PRKCZ, PLCG1, PIK3R1, JUN
Pathway	h_gsk3Pathway	Inactivation of Gsk3 by AKT causes accumulation of b-catenin in Alveolar Macrophages	0.00280755	7	31	APC, GJA1, CCND1, GSK3B, PDPK1, CUX1, PIK3R1
Pathway	lis1pathway	Lissencephaly gene (LIS1) in neuronal migration and development	0.00280755	7	31	CDK5R2, CDK5R1, MAP1B, PAFAH1B1, VLDLR, CSNK2A1, DCX
Pathway	hsa04070	Phosphatidylinositol signaling system	0.00287431	12	76	CDS2, OCRL, PIP4K2B, PIP5K1A, PRKCA, PRKCB, PLCG1, PIK3R1, PIP4K2A, DGKB, PTEN, PLCB1
GeneOntologyCellularComponent	GO:0005798	Golgi-associated vesicle	0.00293839	10	69	AP2A1, SORT1, GJA1, OCRL, SEC24B, AFTPH, SREBF2, RAB14, IGF2R, COPG2
GeneOntologyCellularComponent	GO:0030133	transport vesicle	0.00317976	13	105	AP2A1, SORT1, SEC24B, AFTPH, VAMP2, SYT1, SREBF2, RAB14, PI4K2A, IGF2R, PCSK2, SPRED2, ATP2C1
Pathway	epopathway	EPO signaling pathway	0.00321857	8	40	FOS, CBL, GRB2, RAPGEF1, PLCG1, PIK3R1, CSNK2A1, JUN
Pathway	SA_B_CELL_RECEPTOR_COMPLEXES	SA_B_CELL_RECEPTOR_COMPLEXES	0.0032534	6	24	FOS, BCR, GRB2, ATF2, JUN, MAPK8IP3
Pathway	foxopathway	FoxO family signaling	0.00334356	9	49	SGK1, BCL6, YWHAG, YWHAZ, CREBBP, CSNK1A1, CSNK1G1, USP7, FBXO32
Pathway	CK1PATHWAY	CK1PATHWAY	0.00335155	5	17	CDK5R1, PRKAR1B, PRKACB, DRD2, PLCB1
Pathway	hsa05110	Vibrio cholerae infection	0.00373279	10	59	KDELR1, ADCY3, ATP6V0A1, ATP6V1H, PRKCA, PRKCB, PRKACB, PLCG1, KCNQ1, ATP6V0A2
Pathway	h_ppargPathway	Role of PPAR-gamma Coactivators in Obesity and Thermogenesis	0.00374705	4	11	PPARGC1A, SRC, MED1, CREBBP
GeneOntologyCellularComponent	GO:0048770	pigment granule	0.00382003	12	95	DNAJC5, ATP1A1, SYNGR1, ATP6V0A1, TFRC, HSPA8, YWHAZ, CNP, PDCD6IP, NCSTN, RAB2A, RAB5C
Pathway	P05734	Synaptic vesicle trafficking	0.00405471	6	25	STXBP1, STX1A, VAMP2, SYT1, SYN2, RIMS2
Pathway	h_igf1mtorpathway	Skeletal muscle hypertrophy is regulated via AKT/mTOR	0.00405471	6	25	GSK3B, PDPK1, IGF1R, CUX1, PIK3R1, PTEN
Pathway	P05731	GABA-B receptor II signaling	0.00408421	7	33	ADCY1, CACNA1G, GABBR1, GNG4, CACNA1B, CACNA1A, PRKAR1B
GeneFamily	KIF	Kinesins	0.00424211	5	39	KIF1A, KIF5A, KIF5B, KIF5C, KIF1B
GeneFamily	DNAJ	DnaJ (Hsp40) homologs	0.00424211	5	39	DNAJC5, DNAJB14, DNAJB5, DNAJC6, DNAJC1
Pathway	wnt_calcium_pathway	Noncanonical Wnt signaling pathway	0.00440124	5	18	CAMK2A, MAP3K7, NLK, PLCG1, CSNK1A1
Pathway	P04391	Oxytocin receptor mediated signaling	0.00442223	9	51	GNG4, VAMP2, CACNB4, CACNB1, CACNA1D, PRKCZ, PRKCA, PRKCB, PLCG1
Pathway	h_HuntingtonPathway	Inhibition of Huntington's disease neurodegeneration by histone deacetylase inhibitors	0.00444673	3	6	HTT, CREB1, CREBBP
GeneFamily	THOC	THO complex genes	0.00446781	2	4	THOC7, THOC2
GeneOntologyCellularComponent	GO:0005901	caveola	0.00462811	9	62	SLC8A1, SLC2A3, FLOT2, ATP1A1, CBL, SRC, IGF1R, TSC2, KCNMA1
Pathway	P00003	Alzheimer disease-amyloid secretase	0.00478094	10	61	APP, APBA1, CACNB1, CACNA1D, CHRM1, PRKCZ, PRKCA, PRKCB, PCSK2, NCSTN
Pathway	PW:0000232	phosphatidylinositol 3-kinase-Akt signaling	0.00486719	7	34	PDPK1, TYRO3, PLCG1, PIK3R1, DGKB, PTEN, PLCB1
Pathway	smad2_3nuclearpathway	Regulation of nuclear SMAD2/3 signaling	0.00491054	12	81	MAX, MEF2C, FOS, HDAC2, HSPA8, CREB1, ATF2, CREBBP, RBBP4, JUN, DLX1, NCOR1
Pathway	hsa04730	Long-term depression	0.00492388	11	71	GNA12, GUCY1A3, CACNA1A, GRM5, GRID2, PRKG1, PRKCA, PRKCB, CRH, IGF1R, PLCB1
Pathway	EDG1PATHWAY	EDG1PATHWAY	0.00499313	6	26	ADCY1, SRC, PRKCA, PRKCB, PIK3R1, PLCB1
Pathway	kitpathway	Signaling events mediated by Stem cell factor receptor (c-Kit)	0.00505438	9	52	CBL, GSK3B, GRB10, GRB2, CREBBP, PDPK1, PIK3R1, SPRED2, PTEN
Pathway	h_pgc1aPathway	Regulation of PGC-1a	0.00534069	4	12	PPARGC1A, MEF2A, CAMK4, HDAC5
Pathway	PLCEPATHWAY	PLCEPATHWAY	0.00534069	4	12	ADCY1, PRKAR1B, PRKACB, RAP2B
Pathway	P00040	Metabotropic glutamate receptor group II	0.00593192	8	44	GNG4, STX1A, VAMP2, CACNA1B, CACNA1A, CACNB1, GRM3, PRKAR1B
Pathway	hsa04260	Cardiac muscle contraction	0.00599292	12	83	SLC8A1, ATP1A3, ATP1A1, ATP1B2, CACNB4, CACNB1, CACNA2D1, CACNA1D, UQCR10, TPM1, CACNA2D2, CACNG4
Pathway	h_pyk2Pathway	Links between Pyk2 and Map Kinases	0.00608162	6	27	MAP2K4, SRC, GRB2, PRKCA, PLCG1, JUN

## Sheet: VMB
Table S 2c: Functional Over-Representation Analysis of Genes Differentially Expressed in VMB
Analysis	ID	Name	FDR p-value	Genes in query	Genes in term	Gene Symbols
GeneOntologyCellularComponent	GO:0030425	dendrite	8.83e-21	74	262	SACS, ACHE, ACCN2, ADD1, ADORA1, CACNA1G, CDK5R1, MAP1B, MAP2, MAX, APOD, ARHGEF2, ATP2B2, NTRK2, OPA1, OPRM1, STRN3, CANX, CALD1, CNTNAP2, CACNA1B, CACNA1C, CACNA1A, DNM3, GOPC, CCNG1, NOV, ARHGAP32, CHRM1, PEX5L, EXOC4, MAPK8, MAPK1, PRKCG, PCSK1, PLCB4, CPEB1, DBN1, TTLL7, HOMER1, DRD2, EPHA7, PTPRK, PURA, KCNIP4, SOD1, MAP2K4, CPLX2, SLC1A2, SCN8A, GABRA6, GABBR1, FMR1, RAPGEF4, CADM1, DLGAP3…
GeneOntologyCellularComponent	GO:0043025	cell soma	1.28e-18	72	271	ACHE, ADORA1, CACNA1G, ALCAM, CDK5R1, MAP1B, MAP2, MBP, APOD, KALRN, SHROOM2, ARHGEF2, ATP2B2, NTRK2, OPRM1, BTD, PAFAH1B1, STRN3, CANX, CALD1, CACNA1B, CACNA1C, CACNA1A, NCAM1, RTN4, CCNG1, NOV, CADM2, PI4K2A, EXOC4, MAPK8, MAPK1, PCSK1, PDE1A, TTLL7, HOMER1, SRR, DRD2, EPHA7, RAB2A, PTPRK, PURA, ACSL4, KCNIP4, SOD1, PDE10A, MAP2K4, CPLX2, FABP7, SCN8A, SCN1A, SDC2, GABRA6, GABBR1, TH, TIMP2, KL…
GeneOntologyCellularComponent	GO:0014069	postsynaptic density	1.68e-17	37	87	ADAM10, ADORA1, MAP1B, NTRK2, CALD1, CACNA1C, DNM3, GOPC, ARHGAP32, LIN7C, CHRM1, EXOC4, PJA2, PLCB4, CPEB1, DLGAP1, DLG1, DLG2, DLG4, HOMER1, DRD2, PTK2B, EPS8, DLGAP3, SHANK3, GRM3, GRIA3, GRIA4, GRIN2A, GRIN1, GRIN2C, GRIN2B, LPHN1, NLGN1, YWHAZ, KCND2, NCS1
MousePheno	MP:0002064	seizures	1.42e-16	87	276	ACHE, ADARB1, STX1B, MT3, CACNA1G, CDK5R1, MAPT, MBP, MAFG, ANK3, ATOX1, NTRK2, CELF4, DST, GJC2, KCNAB2, DGKE, CAMK2A, CACNB4, CACNA1A, ATRN, NEUROD2, SLC25A12, NPY, CHN1, SV2B, CNR1, CLCN3, CREBBP, PDGFRA, PLP1, PLCL1, CACNA2D2, DBP, QKI, PTGS2, PTEN, NEUROD6, PURA, FGF14, SOD2, SLC4A3, SLC1A2, SLC2A1, SCN8A, SCN1A, SCN1B, GABRA1, GABBR1, CIT, FMR1, ATE1, GLRA1, GJB1, SLC9A6, CACNG2, GNAQ, TCF1…
GeneOntologyCellularComponent	GO:0045211	postsynaptic membrane	5.42e-16	49	158	ACHE, ADORA1, GRASP, CHRNA6, ARRB2, GOPC, ARHGAP32, LIN7C, CHRM1, PJA2, CPEB1, DLGAP1, DLG1, DLG2, DLG4, HOMER1, EPHA7, GABRA3, GABRA4, GABRA6, GABRA1, GABRA2, GABBR1, GLRA1, GABRG1, GABRG2, GABRB2, GABRB3, GABRD, GPHN, DLGAP3, SHANK3, GRM2, GRM3, GRIA3, GRIA4, GRIK2, GRIN2A, GRIN1, GRIK5, GRIN2C, GRIN2B, DLGAP4, NLGN1, SYNE1, KCNMA1, KCNB1, NCS1, NLGN2
MousePheno	MP:0009745	abnormal behavioral response to xenobiotic	1.13e-14	69	207	GRASP, MT3, CACNA1G, CDK5R1, MAPT, APBA1, AQP4, OPRL1, OPRM1, CACNB4, CACNA1B, CACNA1A, CACNA2D1, NEUROD2, NPY, CNR1, PRKCG, PRKAR2B, CLCN3, CREB1, PLCL1, CACNA2D2, RGS4, DLG4, HOMER1, PTGS2, DRD2, NEUROD6, SLC18A2, FGF14, SOD1, EHMT2, EPS8, SLC4A3, SLC1A2, SCN8A, SCN1A, S100A10, GABRA4, GABRA1, GABRA2, GABBR1, CIT, TH, SLC9A6, GNAZ, GABRG2, GABRB2, GABRB3, GABRD, GFAP, DLGAP3, GRK6, GRM2, GRIA3,…
Pathway	P00039	Metabotropic glutamate receptor group III	2.16e-14	31	65	STX1B, SLC17A7, CACNA1B, CACNA1A, CACNB1, PRKAR1B, PRKAR1A, PRKAR2A, PRKAR2B, VAMP3, GNG12, SLC1A6, SLC1A1, SLC1A2, GNG2, VTI1A, GNB1, GNAI1, GNAI2, STX1A, VAMP2, VAMP1, GRM4, GRIA3, GRIA4, GRIK2, GRIN2A, GRIN1, GRIK5, GRIN2C, GRIN2B
Drug	CID000005070	riluzole	2.36e-14	53	174	ACCN2, CACNA1G, MAP2, MTPN, SLC17A7, CACNB4, CACNB3, CACNA1B, CACNA1C, CACNA1A, CACNB1, CACNB2, CACNA2D1, SCN3B, CACNA2D2, SOD2, SOD1, SLC1A1, SLC1A2, SCN1B, ABCB8, GABRA3, GABRA4, GABRA6, GABRA1, GABRA2, NAV1, GLRA1, CACNG2, ZFP91, GMFB, GABRG1, GABRG2, GABRB2, GABRB3, GABRD, GFAP, NRG3, GRM2, GRM3, GRM4, GRIA3, GRIA4, GRIK2, GRIN2A, GRIK5, GRINA, GRIN2C, GRIN2B, KCNC1, KCND3, TARDBP, CACNG4
GeneOntologyCellularComponent	GO:0030424	axon	3.57e-14	58	230	SACS, ACHE, ACTB, LRRTM1, ADORA1, ALCAM, CDK5R1, MAP1B, MAPT, MBP, ANK3, MTPN, APC, NTRK2, CANX, KCNAB2, CNTNAP2, CACNA1B, NCAM1, NOV, CADM2, CHRM1, MAPK8, MAPK1, PCSK1, DCC, DRD2, PTPRK, PTK2B, SNCA, SNCB, MAP2K4, SLC1A2, SCN8A, SCN1A, GABBR1, RAPGEF4, CADM1, TH, ATL1, GABRB3, GAD2, GAD1, KLHL24, DIXDC1, GRM2, GRM3, GRIA3, GRIA4, GRIK2, GRIK5, KLC1, KCNMA1, KCNA2, NCS1, MYCBP2, UHMK1, ERMN
GeneOntologyBiologicalProcess	GO:0001505	regulation of neurotransmitter levels	4.9e-14	43	138	ACHE, ADORA1, MAOA, APBA1, NTRK2, SLC17A7, SLC17A6, CAMK2A, CACNB4, CACNA1B, CACNA1A, ERC2, LIN7C, SV2B, COMT, NRXN2, NRXN1, EDN3, DRD2, SLC6A4, SNCA, CPLX2, GABRA2, GABBR1, TH, GAD2, GAD1, STXBP1, STX1A, VAMP2, SYT1, HCRT, GRM2, GRM4, GRIK5, GRIN2B, RPH3A, NLGN1, YWHAZ, KCNMB4, PCLO, HTR2C, AGTPBP1
MousePheno	MP:0002207	abnormal long term potentiation	9.26e-14	60	173	ACCN2, ADCY1, ADCYAP1R1, MAPT, KALRN, NTRK2, NRGN, OPRL1, OPRM1, PAK3, DGKE, CAMK2A, CACNB3, CACNA1B, NCAM1, NELL2, JPH3, PINK1, TMOD2, NOVA2, MAPK9, PRKAR1B, CNR1, PRKCG, PRKACB, CREB1, CPEB1, NCAN, RAP1B, DLG4, NEUROD6, EPHA4, RIN1, PTN, EIF4EBP2, PTPRD, SLC18A2, SNCA, CPLX2, ATXN1, GABBR1, FOS, BAIAP2, ICAM5, GNAI1, GFAP, STX1A, HDAC2, GRIA3, GRIK2, GRIN2A, GRIN1, GRIN2B, UBE3A, TYROBP, HTR2C,…
MousePheno	MP:0002272	abnormal nervous system electrophysiology	9.56e-14	69	215	ADORA1, CACNA1G, ABCD2, MAP1B, MAOA, ANK3, KALRN, ATP2B2, OPRM1, SLC17A7, SLC17A6, CACNB4, CACNA1B, CACNA1A, HAPLN2, NEUROD1, JPH3, PINK1, CHN1, PER1, CHD7, PLP1, PLCL1, PLEC, CACNA2D2, DBP, DRD2, NEUROD6, EGR3, SLC6A4, SLC1A6, SLC1A1, SLC2A3, SLC5A3, SCN8A, SCN1A, SCN1B, S100A10, GABBR1, FMR1, FOS, GLRA1, CACNG2, GNAQ, GABRG2, GABRB3, GABRD, GAD2, GAD1, GPHN, TEF, HCRT, SST, GSN, GRIA4, GRIK2, G…
Drug	CID000002910	cyclothiazide	1.37e-13	38	103	MBP, SLC17A7, CACNA1A, CACNB1, CACNA2D1, NCAN, SLC1A6, SLC1A1, SLC1A2, GABRA3, GABRA4, GABRA6, GABRA1, GABRA2, FOS, GLRA1, CACNG2, CACNG3, GABRG1, GABRG2, GABRB2, GABRB3, GABRD, GFAP, TAC3, GRM2, GRM3, GRM4, GRIA3, GRIA4, GRIK2, GRIN2A, GRIK5, GRINA, GRIN2C, GRIN2B, IDE, KCNMA1
Drug	CID000001207	MK-801	2.26e-13	72	296	ACHE, ADORA1, MAP2, PCP2, CHRNA6, KITLG, SLC6A5, NTRK2, OPRL1, OPRM1, CAMK2D, CACNA1C, CACNB2, CACNA2D1, NCAM1, NFKBIA, NPY, CHRM1, CNR1, PRKCG, CREB1, COMT, PDE2A, CSAD, DLG4, PTCH1, DRD2, PTN, SLC6A4, FSCN1, PDE10A, MAP2K4, SLC1A2, GABRA3, GABRA4, GABRA6, GABRA1, GABRA2, CIT, FOS, TH, GLRA1, LYPLA1, GABRG1, GABRG2, GABRB2, GABRB3, GABRD, GAD2, GAD1, GFAP, HBA2, SOX10, GRM2, GRM3, GRM4, SST, GRI…
MousePheno	MP:0002062	abnormal conditioning behavior	8.73e-13	63	195	ACCN2, ADCY1, ADCYAP1R1, GRASP, MAP2, MAPT, KALRN, NTRK2, NRGN, OPRL1, OPRM1, KLF9, SLC17A6, PAK3, CAMK2A, CACNB3, CACNA1B, JPH3, TMOD2, UBR1, POMC, MAPK1, CNR1, PRKCG, PRKACB, PPP3R1, CREB1, DBN1, RAP1B, GIT1, HOMER1, DRD2, RIN1, EIF4EBP2, SLC18A2, SLC6A4, FABP7, ATXN1, GABRA1, GABRA2, GABBR1, FMR1, FOS, TH, TIMP2, GNAI1, GM2A, GMFB, GABRD, GFAP, STX1A, HDAC2, GSK3B, GRIK2, GRIN2A, GRIN1, GRIN2C…
GeneOntologyBiologicalProcess	GO:0006836	neurotransmitter transport	4.46e-12	47	180	ADORA1, STX1B, APBA1, CHRNA6, SLC6A5, NTRK2, SLC17A7, SLC17A6, CAMK2A, CACNB4, CACNA1B, CACNA1A, ERC2, RTN4, PINK1, LIN7C, SV2B, CNR1, CRYM, NRXN2, NRXN1, EDN3, DRD2, RIMS2, SLC18A2, SLC6A13, SLC6A4, SNCA, CPLX2, NISCH, GABRA2, GABBR1, STXBP1, STX1A, VAMP2, SYT1, HCRT, GRM2, GRM4, GRIK5, GRIN2B, RPH3A, NLGN1, YWHAZ, KCNMB4, PCLO, HTR2C
GeneOntologyCellularComponent	GO:0008021	synaptic vesicle	8.58e-12	33	102	SYNPR, MT3, SYT7, APBA1, SYNGR3, SLC17A7, SLC17A6, PI4K2A, SV2B, SCAMP1, DRD2, SNCA, SLC2A3, GABRA2, GABBR1, VTI1A, CADM1, TH, SCAMP5, GAD2, STX1A, VAMP2, VAMP1, SYPL1, SYT1, HCRT, RAB3C, GRIN1, GRIN2B, RPH3A, PCLO, SYT2, SYT11
Drug	CID000001727	4-aminopyridine	1.84e-11	62	258	ACHE, ADORA1, ARAF, KCNAB2, CACNA1B, CACNA1C, CACNA1A, CACNB2, CACNA2D1, CHRM1, PRKCI, PRKCG, PRKCD, PRKAR2B, SCN3B, DCN, PTGS2, SOD2, HSPH1, SCN1B, ABCB8, GABRA4, GABRA6, GABRA1, GABRA2, GABRG1, GABRG2, GABRB2, GUCY1B3, GRM2, GRM3, GRM4, HSPA13, GRIA3, GRIA4, GRIN2A, GRIK5, GRINA, GRIN2C, GRIN2B, HSPA12A, HSPA4L, HSPA8, HSPA9, HSPA4, KCNMB4, VIP, KCNMA1, KCNQ2, KCNJ9, KCND2, KCNC4, KCNC3, KCNC1,…
GeneOntologyCellularComponent	GO:0012506	vesicle membrane	3.36e-11	57	261	SYNPR, AP2B1, AP2A1, SYT7, HIP1R, MDM2, ARCN1, ATP6V0A1, OCA2, SLC17A7, SLC17A6, CAMK2D, CAMK2A, APPL1, CLIC4, PI4K2A, SV2B, CLCN3, GPRC5B, CAMKV, DLG4, SCAMP1, DRD2, RAB27B, SLC18A2, TMED2, SNCA, SLC2A3, GABRA2, TH, GJA1, GP1BB, ATP8A1, CACNG2, CACNG3, SEC24B, SCAMP5, GAD2, GAD1, STX1A, VAMP7, VAMP2, VAMP1, SYPL1, SYT1, APPBP2, GRIA3, GRIA4, RPH3A, EPN2, ZDHHC17, COPG2, KIF1B, SYT2, CACNG4, SYT1…
MousePheno	MP:0002912	abnormal excitatory postsynaptic potential	5.14e-11	30	65	ACCN2, ADCY1, ADORA1, NTRK2, NRGN, OPRM1, SLC17A7, CAMK2A, CACNA1B, CACNA1A, JPH3, CHRM1, MAPK9, CNR1, CLCN3, RAP1B, DLG2, EGR3, ATXN1, GAD1, GFAP, STX1A, DLGAP3, GRM2, SST, GRIA3, GRIA4, GRIK2, GRIN2B, ARHGEF9
GeneOntologyBiologicalProcess	GO:0031644	regulation of neurological system process	6.01e-11	49	206	ACHE, ADORA1, MAP1B, ATP2B2, NTRK2, OPRM1, CAMK2A, CACNA1B, CACNA1A, RTN4, CD38, PINK1, CNR1, CPEB1, CACNA2D2, DBN1, DLG4, EDN3, EDNRB, PTGS2, DRD2, SNCA, NISCH, GABBR1, RAPGEF4, GLRA1, GNAI1, GNAI2, TF, STXBP1, STX1A, HCRT, GRM2, GRM3, GSK3B, GRIA4, GRIK2, GRIN2A, GRIN1, GRIK5, GRIN2C, GRIN2B, NLGN1, YWHAG, KCNMB4, HTR2C, NCS1, NLGN2, NPTN
GeneOntologyBiologicalProcess	GO:0007269	neurotransmitter secretion	1.07e-10	31	98	ADORA1, APBA1, NTRK2, CAMK2A, CACNB4, CACNA1B, CACNA1A, ERC2, LIN7C, SV2B, NRXN2, NRXN1, EDN3, SNCA, CPLX2, GABBR1, STXBP1, STX1A, VAMP2, SYT1, HCRT, GRM2, GRM4, GRIK5, GRIN2B, RPH3A, NLGN1, YWHAZ, KCNMB4, PCLO, HTR2C
Pathway	P00037	Ionotropic glutamate receptor	1.28e-10	22	46	SLC17A6, CAMK2D, CAMK2A, CACNA1B, CACNA1A, VAMP3, SLC1A6, SLC1A1, SLC1A2, VAMP2, VAMP1, SHANK3, GRM2, GRM3, GRIA3, GRIA4, GRIK2, GRIN2A, GRIN1, GRIK5, GRIN2C, GRIN2B
MousePheno	MP:0009747	impaired behavioral response to xenobiotic	1.32e-10	30	67	GRASP, CACNA1G, APBA1, AQP4, OPRL1, OPRM1, CACNB4, CACNA1B, CACNA2D1, CNR1, PRKCG, PLCL1, RGS4, DLG4, DRD2, SLC18A2, EHMT2, S100A10, GABRA4, GABRA1, GABRA2, GABBR1, TH, GNAZ, GABRG2, GABRB3, GABRD, GRIN1, HTR2C, PPP1R1B
MousePheno	MP:0001405	impaired coordination	1.36e-10	73	268	ABCD2, MAFG, ADAM11, MID1, ATP1B2, NTRK3, OCA2, OPA1, KLF9, SLC17A7, PAFAH1B1, DST, CACNB4, CACNA1C, CACNA1A, NEUROD2, JPH3, SLC25A12, UBR1, MAPK6, PRKAR2B, CLCN3, CP, PLP1, PLCB4, CACNA2D2, RGS4, RORB, RORA, FXR2, DTNA, DRD2, SLC18A2, DNAJC5, FGFR1, FGF14, SNCA, MAP2K4, CPLX2, SLC2A1, SCN8A, ATXN1, GABRA1, FMR1, TH, CACNG2, GNAQ, GM2A, B4GALNT1, GABRG2, GABRB3, GAD1, FOXP2, GRM2, GRIA3, GRIN2A, …
MousePheno	MP:0003216	absence seizures	2.88e-10	17	25	CACNA1G, CELF4, CACNA1A, DBP, PTEN, SCN8A, SCN1A, GABBR1, CACNG2, GABRG2, GABRB3, GABRD, TEF, GRIA3, GRIA4, UBE3A, CACNG4
GeneOntologyCellularComponent	GO:0034702	ion channel complex	3.26e-10	48	212	CACNA1G, CHRNA6, CACNB4, CACNB3, CNTNAP2, CACNA1B, CACNA1C, CACNA1A, CACNB1, CACNB2, CACNA2D1, CLIC4, PPP2R4, ANO6, CACNA2D2, KCTD17, AKAP6, ANO3, SCN8A, SCN1A, GABRA3, GABRA4, GABRA6, GABRA1, GABRA2, GLRA1, CACNG2, CACNG3, TTYH3, GABRG1, GABRG2, GABRB2, GABRB3, GABRD, TTYH2, KCNMB4, KCNMA1, KCNQ2, KCND2, KCNC4, KCNC3, KCNC1, KCNB1, KCNF1, KCND3, KCNA6, KCNA2, KCNIP2
MousePheno	MP:0002910	abnormal excitatory postsynaptic currents	3.27e-10	34	85	ADCY1, ADORA1, STX1B, KALRN, APBA1, SLC17A7, SLC17A6, CAMK2A, CACNA1A, LIN7C, CHRM1, CLCN3, VAMP3, RORA, NRXN2, NRXN1, DLG2, DRD2, EPS8, CPLX2, GABBR1, CACNG2, CACNG3, VAMP2, SYT1, RAB3C, GRIN2A, GRIN1, GRIK5, GRIN2C, TYROBP, TRPC5, SYT2, DSCAML1
MousePheno	MP:0001393	ataxia	3.42e-10	65	231	STX1B, ABCD2, MAP1B, MAPT, MBP, MAFG, ANK3, APBA1, APLP2, MLL, ATP2B2, KIF1A, DST, CANX, CACNB4, CACNA1A, NEUROD2, NEUROD1, NFIX, NLK, ATF2, PLP1, PLCB4, DAB1, CACNA2D2, DCC, RORA, QKI, PTEN, DRD2, EGR3, SLC12A2, DNAJC5, FGF14, SOD2, MAP2K4, F3, SCN8A, SCN1A, SCN1B, ATXN1, CIT, GJA1, CACNG2, CACNG3, GNAQ, B4GALNT1, ATCAY, SLC19A2, HYOU1, GRIA3, GRIA4, GRIN1, ZIC1, CBLN3, UGT8, UGCG, TXNRD1, TRIM2…
Drug	CID000003226	enflurane	3.91e-10	26	68	ADORA1, ALAS2, ASS1, CACNA2D1, NBL1, SOD2, PDP1, GABRA3, GABRA4, GABRA6, GABRA1, GABRA2, FOS, GLRA1, GABRG1, GABRG2, GABRB2, GABRB3, GABRD, GRIA3, GRIN2A, GRINA, GRIN2C, GRIN2B, DDN, ATP2C1
GeneOntologyBiologicalProcess	GO:0007214	gamma-aminobutyric acid signaling pathway	5.39e-10	14	23	CACNB4, CACNA1A, SLC12A2, GABRA3, GABRA4, GABRA6, GABRA1, GABRA2, GABBR1, GNAI2, GABRG1, GABRG2, GABRB2, GABRB3
GeneOntologyCellularComponent	GO:0030135	coated vesicle	6.22e-10	46	202	SYNPR, MT3, AP2A1, SYT7, HIP1R, APBA1, ARCN1, SYNGR3, PACSIN1, SLC17A7, SLC17A6, GOPC, PI4K2A, SV2B, PIK3C2A, STEAP2, SCAMP1, DRD2, TMED2, SNCA, SLC2A3, GABRA2, GABBR1, VTI1A, CADM1, TH, CLVS1, SEC24B, SCAMP5, GAD2, STX1A, VAMP2, VAMP1, SYPL1, SYT1, HCRT, RAB3C, GRIN1, GRIN2B, RPH3A, EPN2, PCLO, KIAA0368, COPG2, SYT2, SYT11
GeneOntologyCellularComponent	GO:0033267	axon part	9.71e-10	29	96	ADORA1, MBP, APC, NTRK2, KCNAB2, CNTNAP2, CACNA1B, CHRM1, MAPK8, MAPK1, PCSK1, DRD2, SNCA, SNCB, MAP2K4, SLC1A2, SCN8A, SCN1A, GABBR1, TH, GABRB3, DIXDC1, GRIA3, GRIA4, GRIK2, GRIK5, KCNMA1, KCNA2, ERMN
GeneOntologyCellularComponent	GO:0042734	presynaptic membrane	1.04e-09	20	49	ACHE, ADORA1, CAMK2A, ERC2, NRXN2, NRXN1, DLG1, RIMS2, SLC1A2, GABRA6, GAD2, SYT1, GRM2, GRM3, GRIK2, GRIN2A, GRIK5, GRIN2B, KCNMA1, NPTN
Pathway	ar_nongenomic_pathway	Nongenotropic Androgen signaling	1.1e-09	17	31	AKT1, MAP2K2, MAPK1, CREB1, PLCG1, PIK3CA, PIK3R1, RAC1, GNG2, FOS, GNAZ, GNB1, GNAI1, GNAI2, SRC, PLCB1, PELP1
Drug	CID000003007	amphetamine	1.21e-09	62	284	ADCY1, MBTPS1, TRIM37, MAOA, SLC6A5, OPA1, OPRL1, OPRM1, SLC17A7, SLC17A6, CAMK2D, CAMK2A, CACNA1B, CACNA1C, CACNA2D1, NPY, CHRM1, POMC, PRKCI, PRKCG, PRKCD, CREB1, PDPK1, DNM1L, COMT, CAMKV, DHX9, RICTOR, DUSP8, DRD2, NEUROD6, TPH2, SLC18A2, SLC6A4, SNCA, SNCB, PDE10A, SLC1A1, FOS, TH, GLRA1, GJA1, GH1, GAD2, GAD1, HCRT, SOX10, GRK6, GRM2, GRM3, GRM4, GSK3B, GRIA3, GRIA4, GRIN2A, GRINA, GRIN2C, …
Drug	CID000005466	hydrochloride	1.23e-09	40	146	ACHE, MGAT3, SLC6A5, OPRL1, SLC17A7, SLC17A6, CACNA1B, CACNA2D1, KRIT1, CHRM1, CHN1, NR1D2, COMT, PTCH1, DRD2, SLC18A2, SLC6A13, SLC6A4, SOD2, SLC1A1, SLC1A2, GABRA3, GABRA4, GABRA6, GABRA1, GABRA2, FOS, GABRG1, GABRG2, GABRB2, GABRB3, GABRD, GAD2, GAD1, GRM2, GRM3, GRIA4, GRIK5, GRIN2B, HTR2C
Drug	CID000005255	NAAG	1.39e-09	22	53	GJC2, STT3B, PLP1, NCAN, SLC15A2, GAD2, GAD1, GFAP, GRM2, GRM3, GRM4, GSK3B, GRIA3, GRIK2, GRIN2A, GRIN1, GRINA, GRIN2C, GRIN2B, IDE, SYNE1, TNPO1
GeneOntologyMolecularFunction	GO:0003924	GTPase activity	1.71e-09	49	226	TUBB2B, SAR1A, ARF3, ARL4D, ARF4, ARHGAP5, RHOG, RND3, OPA1, DNM3, DIRAS1, RASL11B, RAB6B, ATL2, DNM1L, RAP1B, DNM1, GNG13, RAB2A, RAB27B, RAC1, RAB5C, EIF2S3, EIF5, AGAP1, AGAP3, RHOF, GNG2, HBS1L, DIRAS2, GTPBP4, RAB31, GNAQ, GNAZ, GNB1, GNAI1, GNAI2, ATL1, RASL10A, GNA13, ARL8B, GSPT1, RHOU, RHOBTB3, RAB18, RASD2, RAB7A, RHOJ, RNF112
MousePheno	MP:0009357	abnormal seizure response to inducing agent	1.86e-09	43	130	MT3, CACNA1G, CDK5R1, MAPT, NTRK2, CELF4, NEUROD2, NPY, CNR1, CLCN3, PLP1, PLCL1, CACNA2D2, DBP, PTGS2, NEUROD6, FGF14, SLC4A3, SLC1A2, SCN8A, SCN1A, GABRA1, GABBR1, CIT, FMR1, SLC9A6, B4GALNT1, GABRG2, GFAP, TEF, GRIA3, GRIA4, GRIK2, GRIN2A, GRIN1, GRIK5, UBE3A, HTR2C, KCNQ2, KCNA2, NR4A3, SLC12A5, PLCB1
Drug	CID000002284	baclofen	2.23e-09	47	191	ADCY1, ADORA1, CACNA1G, OPRL1, OPRM1, CACNB4, CACNB3, CACNA1B, CACNA1C, CACNA1A, CACNB1, CACNB2, CACNA2D1, NPY, POMC, CNR1, CACNA2D2, DRD2, SLC6A13, GABRA3, GABRA4, GABRA6, GABRA1, GABRA2, GABBR1, FOS, GLRA1, CACNG2, GABRG1, GABRG2, GABRB2, GABRB3, GABRD, GAD2, GAD1, GPHN, GRM2, GRM3, GRM4, SST, GRIN2A, GRINA, GRIN2C, GRIN2B, VIP, KCNJ9, CACNG4
Drug	CID000004624	6-hydroxydopamine	2.25e-09	57	255	ACHE, ADCY1, AKT1, TRIM37, MAOA, MAPT, MAZ, OPA1, OPRL1, OPRM1, SLC17A7, SLC17A6, MARCH7, NPY, CHRM1, MAPK9, MAPK6, MAPK1, CREB1, DNM1L, COMT, MAPK14, DYRK1A, DRD2, NEUROD6, TPH2, SLC18A2, SLC6A4, SOD2, SNCA, SNCB, SLC1A2, ARPP21, FOS, DDIT4, TH, GAD2, GAD1, GFRA1, GFAP, HCRT, GRM2, SST, GRIA3, GRIA4, SSTR4, GRIN2A, GRINA, GRIN2C, GRIN2B, HSPA4L, HSPA4, VIP, UBE2L3, HTR2C, KPNB1, PPP1R1B
GeneOntologyBiologicalProcess	GO:0042391	regulation of membrane potential	2.92e-09	41	174	ADORA1, CACNA1G, MBP, MAL, CHRNA6, OPRM1, BCL2L1, CACNB4, CACNA1A, POU3F1, PEX5L, CNR1, PLP1, DLG1, QKI, SOD2, SOD1, SNCA, SLC1A6, SCN8A, SCN1A, ATXN1, GLRA1, CLDN5, CACNG2, GNAQ, TF, MGEA5, HCRT, GRIK2, GRIN2A, GRIN1, GRIK5, GRIN2C, GRIN2B, GJC3, KCNMB4, UGT8, SBF2, KCNMA1, KCND2
Drug	CID000004497	nimodipine	3.51e-09	39	145	ACHE, CACNA1G, ATP2B2, ATP2B1, SLC39A6, CACNB4, CACNB3, CACNA1B, CACNA1C, CACNA1A, CACNB1, CACNB2, CACNA2D1, APPL1, POMC, CDK14, CACNA2D2, EDN3, PTK2B, GABRA4, GABRA6, GABRA1, GABRA2, RAPGEF4, CACNG2, CACNG3, GABRG1, GABRG2, GABRB2, GRM2, GRM3, GRM4, GRIN2A, GRINA, GRIN2C, GRIN2B, IGF2, CACNG4, ATP2C1
Drug	CID000003446	gabapentin	3.6e-09	43	169	ACCN2, ADORA1, CACNA1G, MAOA, BCAT1, CACNB4, CACNB3, CACNA1B, CACNA1C, CACNA1A, CACNB1, CACNB2, CACNA2D1, SCN3B, CACNA2D2, ARID4B, SLC6A13, FSCN1, FOXG1, SCN1B, ABCB8, GABRA3, GABRA4, GABRA6, GABRA1, GABRA2, CACNG2, CACNG3, GABRG1, GABRG2, GABRB2, GABRB3, GABRD, GRM2, GRM3, GRIA4, GRIN2A, GRIK5, GRINA, GRIN2C, GRIN2B, SLC7A5, CACNG4
MousePheno	MP:0003008	enhanced long term potentiation	3.98e-09	21	41	NRGN, OPRL1, CAMK2A, CACNB3, NELL2, CNR1, DLG4, RIN1, PTN, PTPRD, SLC18A2, BAIAP2, ICAM5, GFAP, HDAC2, GRIA3, TYROBP, ITPKA, KCNIP3, KCNAB1, ARHGEF9
MousePheno	MP:0001399	hyperactivity	5.48e-09	59	214	ABCA2, ADCYAP1R1, CACNA1G, ABCD2, KALRN, MID1, NTRK2, CELF4, OCA2, OPRM1, CAMK2A, CACNA1B, CBL, ATRN, TMOD2, CHRM1, CNR1, PRKAR2B, CLCN3, PPP3R1, PPP3CB, ATF2, CHD7, RCAN2, CACNA2D2, FXR2, SRR, RCAN1, TPH2, SLC6A4, SLC12A2, EHMT2, FABP7, GABRA3, GABRA1, GABBR1, FMR1, FOS, ATE1, TH, GLRA1, SLC9A6, CACNG2, TOM1L2, GABRB2, GABRB3, GRK6, GRM2, GRIA4, GRIN1, HTR2C, KCNC3, KCNC1, NR4A3, PPP1R1B, KCNIP3…
GeneOntologyBiologicalProcess	GO:0003001	generation of a signal involved in cell-cell signaling	5.72e-09	51	248	ACVR2B, ADORA1, SYT7, APBA1, ACVR1C, CHRNA6, NTRK2, CAMK2A, CACNB4, CACNA1B, CACNA1C, CACNA1A, ERC2, RTN4, CD38, NEUROD1, PINK1, LIN7C, SV2B, CNR1, CREB1, PFKL, CHD7, NRXN2, NRXN1, EDN3, DRD2, RIMS2, SNCA, CPLX2, GABBR1, RAPGEF4, TCF7L2, STXBP1, STX1A, VAMP2, MGEA5, SYT1, HCRT, GRM2, GRM4, GRIK5, GRIN2B, SERP1, RPH3A, NLGN1, YWHAZ, KCNMB4, PCLO, HTR2C, JAK2
MousePheno	MP:0000947	convulsive seizures	7.71e-09	41	126	MBP, MAFG, ANK3, CELF4, GJC2, DGKE, CACNB4, CACNA1A, NEUROD2, SLC25A12, CHN1, CLCN3, PLP1, CACNA2D2, DBP, QKI, PTGS2, PTEN, SLC1A2, SCN8A, SCN1A, GABBR1, CIT, FMR1, ATE1, GJB1, GNAQ, B4GALNT1, GAD2, TEF, GRIN1, ZNF24, UBE3A, HTR2C, KCNQ2, KCNC3, KCNC1, KCNA2, NR4A3, SLC12A5, PLCB1
Pathway	CREBPATHWAY	CREBPATHWAY	8.49e-09	15	27	ADCY1, AKT1, CAMK2D, CAMK2A, MAPK1, PRKAR1B, PRKAR1A, PRKAR2A, PRKAR2B, PRKACB, CREB1, PIK3CA, MAPK14, PIK3R1, RAC1
Pathway	CALCIUM_REGULATION_IN_CARDIAC_CELLS	CALCIUM_REGULATION_IN_CARDIAC_CELLS	9.1e-09	39	143	ADCY1, SAR1A, ARRB2, ATP2B2, ATP2B1, ATP1B2, CAMK2D, GJC2, CAMK2A, CACNB3, CACNA1B, CACNA1C, CACNA1A, CACNB1, RGS5, CHRM1, PRKAR1B, PRKAR1A, PKIA, PRKCG, PRKCD, PRKAR2A, PRKAR2B, PRKACB, RGS16, RGS4, GNG12, GNG13, SLC8A1, GNG2, GJB1, GJA1, GNAQ, GNAZ, GNB1, GNAI2, GRK6, YWHAB, KCNB1
GeneOntologyBiologicalProcess	GO:0007270	nerve-nerve synaptic transmission	1.04e-08	24	75	ADORA1, NTRK2, CACNB4, CACNA1A, PINK1, TMOD2, CNR1, PTGS2, DRD2, SNCA, NISCH, GABRA6, TH, GLRA1, GABRB3, STXBP1, GRM2, GRM3, GRIA4, GRIK2, GRIN1, GRIK5, SHC3, KIF1B
Pathway	lysophospholipid_pathway	LPA receptor mediated events	1.17e-08	24	65	ADCY1, AKT1, MAPT, ARHGEF1, NFKBIA, PRKCD, CRK, PLCG1, PIK3R1, SLC9A3R2, LPAR1, RAC1, PTK2B, GNG2, GAB1, FOS, GNAQ, GNAZ, GNB1, GNAI1, GNAI2, GNA13, SRC, GSK3B
GeneOntologyCellularComponent	GO:0034704	calcium channel complex	1.4e-08	14	28	CACNA1G, CACNB4, CACNB3, CACNA1B, CACNA1C, CACNA1A, CACNB1, CACNB2, CACNA2D1, PPP2R4, CACNA2D2, AKAP6, CACNG2, CACNG3
GeneOntologyCellularComponent	GO:0030672	synaptic vesicle membrane	1.64e-08	19	51	SYNPR, SYT7, SLC17A7, SLC17A6, PI4K2A, SV2B, SCAMP1, DRD2, SLC2A3, GABRA2, SCAMP5, GAD2, STX1A, VAMP2, VAMP1, SYT1, RPH3A, SYT2, SYT11
Pathway	reelinpathway	Reelin signaling pathway	1.65e-08	15	28	AKT1, CDK5R1, MAP1B, MAPT, ARHGEF2, PAFAH1B1, CBL, MAPK8, CRKL, PIK3CA, PIK3R1, DAB1, GSK3B, GRIN2A, GRIN2B
Drug	CID000093460	VOLTAGE	1.66e-08	31	106	CACNA1G, KCNAB2, CACNB3, CACNA1B, CACNA1C, CACNA1A, CACNB1, CACNB2, CACNA2D1, CHRM1, PRKCG, AKAP9, SCN3B, CACNA2D2, SCN1B, ABCB8, NAV1, CACNG2, CACNG3, TFRC, KCND2, KCNC4, KCNC3, KCNC1, KCNB1, KCNF1, KCND3, KCNA6, KCNA2, KCNAB1, CACNG4
GeneOntologyMolecularFunction	GO:0022843	voltage-gated cation channel activity	1.84e-08	36	151	CACNA1G, KCNAB2, CACNB4, CACNB3, CACNA1B, CACNA1C, CACNA1A, CACNB1, CACNB2, CACNA2D1, SCN3B, CACNA2D2, KCTD17, SCN8A, SCN1A, SCN1B, CACNG2, CACNG3, GRIN2A, GRIN1, KCNMA1, KCNQ2, KCNJ9, KCND2, KCNC4, KCNC3, KCNC1, KCNB1, KCNF1, KCND3, KCNA6, KCNA2, HCN3, KCNIP2, KCNAB1, CACNG4
Pathway	P00040	Metabotropic glutamate receptor group II	1.98e-08	19	44	STX1B, CACNA1B, CACNA1A, CACNB1, PRKAR1B, PRKAR1A, PRKAR2A, PRKAR2B, VAMP3, GNG12, GNG2, GNB1, GNAI1, GNAI2, STX1A, VAMP2, VAMP1, GRM2, GRM3
Drug	CID000005917	pentylenetetrazol	2.15e-08	35	130	ACLY, ADORA1, MAP1B, OGDH, CACNA2D1, NPY, SV2B, CREB1, PTCH1, GABRA3, GABRA4, GABRA6, GABRA1, GABRA2, FOS, GLRA1, GABRG1, GABRG2, GABRB2, GABRB3, GABRD, GAD2, GAD1, GFAP, NDE1, GRM3, SST, GRIA3, GRIA4, GRIN2A, GRINA, GRIN2C, GRIN2B, IDS, HTR2C
Drug	CID000003331	felbamate	2.28e-08	24	70	PTCH1, GABRA3, GABRA4, GABRA6, GABRA1, GABRA2, GLRA1, GABRG1, GABRG2, GABRB2, GABRB3, GABRD, GAD2, GRM2, GRM3, GRM4, GRIA3, GRIA4, GRIK2, GRIN2A, GRIK5, GRINA, GRIN2C, GRIN2B
GeneOntologyCellularComponent	GO:0019717	synaptosome	2.59e-08	31	122	SYNPR, ACCN2, SLC17A7, SLC17A6, CACNA1B, ERC2, GOPC, LIN7C, PRKCG, VAMP3, DLG1, DLG4, HOMER1, RIMS2, SNCA, SNCB, ITSN1, EPS8, GABBR1, FMR1, FOS, CADM1, STX1A, VAMP2, VAMP1, GRIN2A, GRIN1, GRIK5, GRIN2B, RPH3A, KCND2
Drug	CID000004054	memantine	2.63e-08	27	86	ACHE, CHRNA6, SLC6A5, MMP16, OPA1, BCL2L1, SLC17A7, NFKBIA, PPP2R4, CPM, DBN1, RCAN1, GLRA1, GRM2, GRM3, GRM4, GSK3B, GRIA3, GRIA4, GRIN2A, GRIN1, GRIK5, GRINA, GRIN2C, GRIN2B, HSPA4, TARDBP
MousePheno	MP:0002945	abnormal inhibitory postsynaptic currents	2.82e-08	25	60	APBA1, SLC6A5, CACNA1B, ERC2, NOVA2, CHRM1, CNR1, NRXN2, DNM1, PTGS2, CPLX2, IL1RAPL1, GABRA4, GABRA1, GABBR1, GLRA1, GABRG2, GABRD, GAD1, SYT1, GRIK2, TYROBP, PIP5K1C, SYT2, ARHGEF9
GeneOntologyCellularComponent	GO:0043197	dendritic spine	2.85e-08	23	74	ACCN2, ADD1, CDK5R1, NTRK2, CANX, CALD1, DNM3, ARHGAP32, DRD2, SLC1A2, GABBR1, FMR1, RAPGEF4, DLGAP3, GRM3, GSK3B, GRIA3, GRIN2A, GRIN1, GRIN2B, SYNE1, KCND2, DDN
MousePheno	MP:0000950	abnormal seizure response to pharmacological agent	2.87e-08	33	94	MT3, CACNA1G, CDK5R1, MAPT, NEUROD2, NPY, CNR1, CLCN3, PLCL1, CACNA2D2, PTGS2, NEUROD6, FGF14, SLC4A3, SLC1A2, SCN8A, SCN1A, GABRA1, CIT, SLC9A6, GABRG2, GFAP, GRIA3, GRIA4, GRIK2, GRIN1, GRIK5, HTR2C, KCNQ2, KCNA2, NR4A3, SLC12A5, PLCB1
Pathway	hsa04010	MAPK signaling pathway	3.32e-08	59	275	CACNA1G, AKT1, MAPT, MAX, MEF2C, ACVR1C, ARRB2, NTRK2, CACNB4, CACNB3, CACNA1B, CACNA1C, CACNA1A, CACNB1, CACNB2, CACNA2D1, PPM1B, MAP2K2, MAPK9, MAPK8, MAPK1, PRKCG, PRKACB, PPP3R1, PPP3CB, NLK, CRKL, CRK, AKT3, ATF2, PDGFA, PDGFRA, TAOK3, RASGRP1, MAPK14, CACNA2D2, RAP1B, RASGRF2, GNG12, DUSP8, RAC1, FGFR1, FGFR3, FGFR2, FGF13, FGF14, MAP2K4, CHP, DUSP14, FOS, CACNG2, CACNG3, MAP3K7, HSPB1, HSP…
MousePheno	MP:0001406	abnormal gait	3.42e-08	64	251	ACHE, MAP1B, ANK3, PCP2, MEF2C, ATP2B2, OCA2, CA8, CACNB4, MCOLN1, CACNA1A, ATRN, CHN1, PI4K2A, COL1A2, CLCN3, CP, PLP1, PLCB4, PRG4, PIGA, DAB1, CACNA2D2, DCC, RORB, RORA, QKI, NPEPPS, DRD2, EPHA4, EGR3, PURA, FGFR1, FGFR3, FGF14, SOD2, SNCA, MAP2K4, CPLX2, SCN8A, SCN1A, ATXN1, GABBR1, CIT, FMOD, TH, GLRA1, GJA1, GABRG2, GAD1, HCRT, ATCAY, ZIC1, CBLN3, UGT8, UGCG, IGF2, UBE3A, TXNRD1, IDS, KCNMA…
MousePheno	MP:0002886	abnormal glutamate-mediated receptor currents	3.71e-08	19	38	ADARB1, KALRN, SLC17A6, CACNB3, NRXN2, NRXN1, DLG4, EPS8, FABP7, CACNG2, GNAQ, DLGAP3, GRIA4, GRIK2, GRIN2A, GRIN1, GRIN2C, GRIN2B, PIP5K1C
Pathway	EDG1PATHWAY	EDG1PATHWAY	4.62e-08	14	26	ADCY1, AKT1, MAPK1, PDGFA, PDGFRA, PIK3CA, PIK3R1, RAC1, GNB1, GNAI1, SRC, SNW1, ITGAV, PLCB1
GeneOntologyBiologicalProcess	GO:0006887	exocytosis	5.87e-08	38	171	VPS33A, STX1B, CACNA1G, SYT7, CACNA1C, CACNA1A, LIN7C, SCRN1, PEX5L, PI4K2A, SV2B, EXOC4, STEAP2, VAMP3, SCAMP1, RAB27B, RIMS2, SNCA, CPLX2, CHP, IL1RAPL1, RAPGEF4, GLRA1, SDF4, SCAMP5, STXBP1, STX1A, VAMP7, VAMP2, SYT1, RAB3C, GRIK5, RPH3A, NLGN1, YWHAZ, PCLO, NCS1, EXOC6B
GeneOntologyCellularComponent	GO:0030139	endocytic vesicle	6.54e-08	23	77	ABCA1, AP2B1, AP2A1, MDM2, CAMK2D, CAMK2A, DLG4, LPAR1, DRD2, RAB5C, ITSN1, CACNG2, CACNG3, TF, VAMP7, SYT1, GRIA3, GRIA4, EPN2, RAB7A, SYT2, CACNG4, LAMP2
GeneOntologyCellularComponent	GO:0030666	endocytic vesicle membrane	6.88e-08	16	40	AP2B1, AP2A1, MDM2, CAMK2D, CAMK2A, DLG4, CACNG2, CACNG3, VAMP7, SYT1, GRIA3, GRIA4, EPN2, SYT2, CACNG4, LAMP2
MousePheno	MP:0002065	abnormal fear/anxiety-related behavior	7.87e-08	54	202	ABCA2, ADCY1, ADCYAP1R1, ADORA1, MAOA, MAP2, MAPT, KALRN, ARAF, NTRK2, SLC17A7, CAMK2A, CACNB4, CACNA1B, CACNA1C, NPY, UBR1, PRKCG, CLCN6, COMT, SERPINI1, GIT1, PTCH1, NPEPPS, FXR2, DRD2, TPH2, SLC6A4, EHMT2, CPLX2, SLC2A3, FABP7, SCN8A, S100A10, GABRA1, GABBR1, FMR1, FOS, TH, GM2A, TOM1L2, GABRG2, GABRD, GAD2, DLGAP3, GRIA3, GRIK2, GRIN1, NR3C1, IDS, TRPC5, NTAN1, RASD2, ARHGEF9
Drug	D003975	Diazepam	8.21e-08	15	32	ACCN2, CNR1, GABRA3, GABRA4, GABRA6, GABRA1, GABRA2, GABBR1, FOS, GABRG2, GABRB3, GABRD, GAD2, GAD1, GRIN2A
Drug	D007980	Levodopa	8.81e-08	7	7	MT3, GABRA1, TH, GABRG2, GABRB2, GAD2, GAD1
GeneOntologyCellularComponent	GO:0043204	perikaryon	1.03e-07	18	51	MAP1B, OPRM1, BTD, CACNA1A, PI4K2A, MAPK8, MAPK1, TTLL7, DRD2, PDE10A, MAP2K4, TH, KLHL24, GRIA3, GRIK2, GRIK5, DDN, SLC12A5
Pathway	endothelinpathway	Endothelins	1.09e-07	22	62	ADCY1, AKT1, MAP2K2, MAPK8, MAPK1, COL1A2, PRKCG, PRKCD, CRK, MAPK14, EDN3, EDNRB, RAC1, PTK2B, FOS, GNAQ, GNAZ, GNAI1, GNAI2, SRC, JAK2, PLCB1
GeneFamily	CACN	Calcium channels	1.14e-07	8	15	CACNA1G, CACNA1B, CACNA1C, CACNA1A, CACNB2, CACNA2D2, CACNG3, CACNG4
MousePheno	MP:0000813	abnormal hippocampus layer morphology	1.21e-07	26	68	CDK5R2, CDK5R1, MAP1B, MAP2, MAPT, KALRN, DCLK1, ATRX, PAFAH1B1, NCAM1, NEUROD1, KLF7, CLCN3, CRKL, CRK, DAB1, DLG4, PTEN, NEUROD6, FOXG1, SLC1A2, FUS, TOP2B, HDAC2, KIF2A, NR4A3
MousePheno	MP:0001504	abnormal posture	1.25e-07	48	173	ACHE, TLN2, ABCD2, MAP1B, MAOA, ARAF, MLL, ATP2B2, SLC17A7, SLC17A6, DST, PBX1, CACNB4, MCOLN1, CACNA1A, CACNB1, SLC25A12, NOV, CDKN1A, CLCN3, CYLD, RORA, DRD2, EGR3, PURA, DNAJC5, FGFR1, FGF14, SNCA, CPLX2, SCN8A, SCN1A, GABRA1, GABBR1, TH, GLRA1, TIMP3, GPHN, VAMP1, HCRT, HYOU1, UBE3A, SBF2, KIF5A, NR4A3, SUZ12, MYCBP2, SLC12A5
MousePheno	MP:0009746	enhanced behavioral response to xenobiotic	1.34e-07	21	48	OPRM1, CACNA1B, CACNA1A, PRKCG, PRKAR2B, CLCN3, DLG4, HOMER1, DRD2, SLC18A2, SOD1, EHMT2, SCN8A, GNAZ, GABRG2, DLGAP3, GRK6, HTR2C, KCNC3, KCNC1, PPP1R1B
GeneFamily	RNF	RING-type zinc fingers	1.39e-07	29	209	RNF160, CBL, MARCH7, RNF149, RNF121, PJA1, PJA2, DTX3, RNF41, RNF130, RNF114, RNF4, RNF14, TRIM44, MID2, RLIM, RNF141, MSL2, RBCK1, CNBP, TTC3, RNF208, TRIM2, RNF146, PCGF6, RNF13, TRIM59, TRIM8, RNF112
Interaction	HPRD:04199	Discs, large homolog 4	1.52e-07	31	99	GRASP, MAP1A, ATP2B2, BAI1, ARHGAP32, DLGAP1, DLG2, DLG4, GNG13, GDA, PTK2B, FZD2, CIT, CACNG2, SRC, GRIK2, GRIN2A, GRIN1, GRIK5, GRIN2C, GRIN2B, DLGAP4, LPHN1, NLGN1, HTR2C, KCND2, ZDHHC17, KCNA2, SEMA4G, NLGN2, KIF1B
MousePheno	MP:0002915	abnormal synaptic depression	1.67e-07	29	82	ADORA1, CDK5R1, NRGN, CAMK2A, NCAM1, PINK1, CHRM1, SV2B, PRKAR1B, CNR1, PRKACB, PPP3R1, PLCB4, NRXN2, NRXN1, DRD2, FMR1, GNAQ, GFAP, FOXP2, SYT1, GRM2, GRIA3, GRIN1, GRIN2B, NR3C1, KCNMA1, PIP5K1C, ARHGEF9
Drug	C044101	endotoxin, Escherichia coli	1.94e-07	16	38	NFKBIA, OTUB1, CREBBP, MAPK14, PTGS2, C1QL3, SOD1, DNAJB4, GMFB, HYOU1, HSPB1, IL6ST, IFNGR2, JAK1, MMD, C1QTNF4
Drug	D010424	Pentobarbital	1.96e-07	30	111	ACCN2, XIAP, MCL1, NTRK3, NPY, MED1, POMC, CDKN1A, MAPK1, CNR1, PTGS2, RAC1, SLC2A1, GABRA4, GABRA6, GABRA1, GABRA2, FOS, GJB1, GNAI1, GABRG2, GABRB2, GABRB3, GABRD, GFAP, GRIN2A, GRIN1, GRIN2C, GRIN2B, HSPB1
Pathway	GABAPATHWAY	GABAPATHWAY	2.28e-07	9	12	UBQLN1, DNM1, GABRA3, GABRA4, GABRA6, GABRA1, GABRA2, GPHN, SRC
GeneOntologyBiologicalProcess	GO:0051970	negative regulation of transmission of nerve impulse	2.34e-07	14	33	ACHE, ADORA1, CD38, PTGS2, DRD2, GABBR1, RAPGEF4, GLRA1, GNAI1, GNAI2, STXBP1, HCRT, GRM2, GRIK2
GeneOntologyBiologicalProcess	GO:0070838	divalent metal ion transport	2.41e-07	38	180	ACCN2, ADCYAP1R1, CACNA1G, ATP2B2, ATP2B1, CAMK2D, CAMK2A, CACNB4, CACNB3, MCOLN1, CACNA1B, CACNA1C, CACNA1A, CACNB1, CACNB2, CACNA2D1, NPY, CTGF, PLCG1, CACNA2D2, PTGS2, SLC8A1, SNCA, MMGT1, IL1RAPL1, GJA1, CACNG2, CACNG3, GNAI2, MGEA5, HCRT, GRIN2A, GRIN1, GRIN2B, TRPC5, NCS1, CACNG4, ATP2C1
GeneOntologyBiologicalProcess	GO:0043241	protein complex disassembly	2.47e-07	24	87	ADD1, MAP1B, MAP1A, MAP2, MAPT, MAZ, EIF5A2, APC, SHROOM2, MID1, ARHGEF2, TMOD3, RDX, SMARCE1, SGK1, SUPT16H, MGEA5, SPTBN1, GSN, XRN2, HMGA1, TPM1, CLASP1, CLASP2
Interaction	HPRD:12257	RICS	2.73e-07	13	23	ARHGAP32, CRKL, CRK, PLCG1, PIK3R1, DLG4, ATXN1, GAB1, CAMK2N2, SRC, GRIN2A, GRIN2B, SHC3
GeneOntologyMolecularFunction	GO:0030165	PDZ domain binding	2.88e-07	21	70	MPP2, GRASP, APBA1, ATP2B2, ATP2B1, LIN7C, EXOC4, CLCN3, SLC9A3R1, DLG1, DLG2, DLG4, LPAR1, PTEN, SRR, CADM1, GJA1, CLDN5, GRIA3, GRIK2, GRIN2C
Pathway	hedgehog_glipathway	Hedgehog signaling events mediated by Gli proteins	2.89e-07	18	46	AKT1, ARRB2, SPOP, PIAS1, PRKCD, CREBBP, CSNK1D, RBBP4, PTCH1, RAB23, GNG2, GNAZ, GNB1, GNAI1, GNAI2, HDAC2, GSK3B, FBXW11
Interaction	HPRD:03131	PTK2B protein tyrosine kinase 2 beta	3.25e-07	24	68	MATK, ARHGAP5, CBL, RB1CC1, PRKCD, PDCD6IP, CRK, PDPK1, PIK3R1, DLG4, PTK2B, FGFR3, FGFR2, SNCA, EWSR1, SLC2A1, DLGAP3, GNA13, SRC, GSN, GRIN2A, KCNA2, JAK2, JAK1
Pathway	NOS1PATHWAY	NOS1PATHWAY	3.62e-07	12	22	PRKAR1B, PRKAR1A, PRKAR2A, PRKAR2B, PRKACB, PPP3CB, DLG4, SYT1, GRIN2A, GRIN1, GRIN2C, GRIN2B
Drug	CID000003763	isoflurane	3.86e-07	55	279	TRAPPC9, ACCN2, ALAS2, CHRNA6, ATP2B2, ATP2B1, P4HA1, ZZZ3, CACNA1C, CACNA2D1, SMARCA5, NBL1, NPY, CHRM1, PRKCG, CREBBP, PIK3C2A, MAPK14, SCN3B, SOD2, SLC1A1, SCN1B, ABCB8, GABRA3, GABRA4, GABRA6, GABRA1, GABRA2, GLRA1, GABRG1, GABRG2, GABRB2, GABRB3, GABRD, VAMP7, VAMP2, VAMP1, HBA2, HCRT, GRM2, GRM3, GRM4, GRIA3, GRIA4, GRIK2, GRIN2A, GRIK5, GRINA, GRIN2C, GRIN2B, HSPB1, HIF1A, KCNMA1, DDN, ATP…
Drug	CID000003016	diazepam	3.92e-07	42	190	ADCY1, ADORA1, ALAS2, NPTX1, OPRL1, OPRM1, CACNA2D1, NPY, POMC, EFHD2, PHF20, PER1, PTCH1, SLC4A3, SLC2A1, FUS, GABRA3, GABRA4, GABRA6, GABRA1, GABRA2, FOS, GLRA1, GABRG1, GABRG2, GABRB2, GABRB3, GABRD, GAD2, GAD1, GPHN, GRIN2A, GRIK5, GRINA, GRIN2C, GRIN2B, IDS, TTR, HTR2C, NPTXR, ARHGEF9, SLC12A5
MousePheno	MP:0000745	tremors	4e-07	53	206	ABCA2, ACHE, ABCD2, MAP1B, MAPT, MBP, ANK3, ARAF, SLC6A5, ATP2B2, ATP1B2, OCA2, OPA1, DST, GJC2, KCNAB2, CACNA1A, ATRN, NFIA, SLC25A12, NOVA1, POU3F1, PI4K2A, CLCN3, ATF2, PDGFRA, PLP1, DAB1, CACNA2D2, RORA, QKI, EGR3, PURA, FGFR2, SOD2, MAP2K4, SCN8A, SCN1A, GABRA1, CIT, GLRA1, GJB1, GABRG2, GABRB3, GRIA3, ZNF24, UGT8, TXNRD1, TRIM2, KIF5A, KCNMA1, KCNC3, KCNC1
GeneOntologyBiologicalProcess	GO:0010975	regulation of neuron projection development	4.01e-07	23	83	ACHE, AKT1, MAP1B, MBP, KALRN, ARHGEF1, NTRK2, CACNA1A, RTN4, CNR1, DBN1, DCC, PTEN, SGK1, IL1RAPL1, RAPGEF4, HDAC2, DIXDC1, GSK3B, GRIN1, HMGB1, SYNE1, NCS1
GeneOntologyCellularComponent	GO:0034703	cation channel complex	4.35e-07	31	137	CACNA1G, CACNB4, CACNB3, CNTNAP2, CACNA1B, CACNA1C, CACNA1A, CACNB1, CACNB2, CACNA2D1, PPP2R4, CACNA2D2, KCTD17, AKAP6, SCN8A, SCN1A, CACNG2, CACNG3, KCNMB4, KCNMA1, KCNQ2, KCND2, KCNC4, KCNC3, KCNC1, KCNB1, KCNF1, KCND3, KCNA6, KCNA2, KCNIP2
MousePheno	MP:0004008	abnormal GABA-mediated receptor currents	4.39e-07	9	11	NRXN2, NRXN1, GABRA3, GABRA4, GABRA1, GABRA2, GABRG2, GABRB2, GABRB3
MousePheno	MP:0004753	abnormal miniature excitatory postsynaptic currents	4.43e-07	19	43	ADCY1, STX1B, KALRN, SLC17A7, CACNA1B, CACNA1A, CHRM1, DNM1, EPHA4, SNCA, CPLX2, CACNG2, CACNG3, VAMP2, GRIN2A, GRIN1, GRIN2C, PIP5K1C, SYT2
Drug	CID000002818	clozapine	4.96e-07	54	274	SERPINA3, ADAR, MAOA, APOD, CHRNA6, SLC6A5, SLC17A7, SLC17A6, NPY, CHRM1, POMC, PRKCI, PRKCG, PRKCD, PPP3R1, CREB1, COMT, POLR3E, DLG4, DTNA, DRD2, SLC6A4, EWSR1, SLC1A2, GABRA3, GABRA4, GABRA6, GABRA1, GABRA2, FOS, TH, GABRG1, GABRG2, GABRB2, GABRB3, GABRD, GAD1, NRG3, HDAC2, GRM2, GRM3, GSK3B, GRIA3, GRIA4, GRIN2A, GRIN1, GRIK5, GRINA, GRIN2C, GRIN2B, HSPA4, HTR2C, KCND2, LPL
Interaction	HPRD:02177	Synapse-associated protein 102	5.31e-07	16	35	ABCA1, EXOC4, DLG1, DLG4, GDA, PTK2B, CACNG2, DLGAP3, GRIK2, GRIN2A, GRIN1, GRIN2C, GRIN2B, DLGAP4, LPHN1, KIF1B
Drug	CID000004914	procaine	5.36e-07	36	153	ACHE, ACCN2, TUBB2B, CACNA1G, TRIM37, CHRNA6, CACNB4, CACNB3, CACNA1B, CACNA1C, CACNA1A, CACNB1, CACNB2, CACNA2D1, CHRM1, POMC, PRKCI, PRKCG, PRKCD, PPP3R1, SCN3B, CACNA2D2, SCN1B, ABCB8, GABRA4, GABRA6, GABRA1, GABRA2, FOS, GH1, CACNG2, CACNG3, GABRG1, GABRG2, GABRB2, CACNG4
GeneOntologyBiologicalProcess	GO:0016567	protein ubiquitination	5.54e-07	39	193	FBXO9, AKT1, FBXL3, MDM2, ARRB2, HECTD1, ANAPC1, UBQLN1, PELI1, CBL, NEDD4, PINK1, CDC27, MAPK9, PRKCG, FEM1B, DCAF7, RNF41, CAND1, TRIP12, RNF14, DZIP3, OS9, FGFR3, GTPBP4, WWP1, RLIM, GSPT1, PRPF19, UBE2L3, UBE2V2, UBE3A, UBE2B, UBE2D3, TTC3, USP22, SUZ12, LMO7, FBXW11
GeneOntologyBiologicalProcess	GO:0007628	adult walking behavior	5.66e-07	12	26	CACNB4, CACNA1C, CACNA1A, CHD7, HIPK2, DRD2, EPHA4, SCN8A, SCN1A, GLRA1, KCNMA1, KLHL1
Drug	CID000009034	methohexital	6.91e-07	12	24	POMC, MAPK1, GABRA3, GABRA4, GABRA6, GABRA1, GABRA2, GABRG1, GABRG2, GABRB2, GABRB3, GABRD
GeneOntologyMolecularFunction	GO:0032403	protein complex binding	7.16e-07	52	295	SACS, TLN2, ACTN4, ACVR2B, ADAM10, ADD1, ADORA1, AP2B1, MAP1B, MAX, ACVR1C, ADAM11, UBQLN1, STRN3, DST, RTN4, NFKBIA, CLIC4, CDKN1A, PI4K2A, EXOC4, PEX6, PDPK1, EDIL3, PCSK1, CTGF, PLCG1, PIK3R1, DNM1, PTK2B, PDP1, NISCH, RAPGEF4, PHIP, TIMP2, GNAQ, STK11, VAMP2, SORBS1, SPTBN1, GRB10, ST13, NR3C1, RPH3A, YWHAZ, YWHAB, HIF1A, IGF2, SYNM, ITGB5, NPTXR, ING2
GeneOntologyBiologicalProcess	GO:0007611	learning or memory	7.4e-07	31	138	ACCN2, ADCY1, PAFAH1B1, CACNA1C, NEUROD2, TMOD2, PRKAR1B, CNR1, PRKCG, PRKAR2B, COMT, DLG4, PTGS2, PTEN, DRD2, PTN, ACSL4, SGK1, ATXN1, IL1RAPL1, FOS, TH, GM2A, FOXP2, GRM4, GRIN2A, GRIN1, GRIN2B, SHC3, NTAN1, PLCB1
Drug	D009020	Morphine	7.63e-07	20	61	MAPT, OPRM1, BCL2L1, NCAM1, NFKBIA, POMC, CREB1, PTGS2, DRD2, FGFR1, SNCA, GNG2, GABRA1, FOS, GNAI2, GABRD, GAD1, GRIA3, GRIA4, GRIN2C
Drug	CID000114827	LY354740	7.92e-07	18	51	SLC6A5, CALD1, CACNA2D1, STT3B, S100A10, FOS, GRM2, GRM3, GRM4, GRIA3, GRIA4, GRIK2, GRIN2A, GRIK5, GRINA, GRIN2C, GRIN2B, TNPO1
GeneOntologyMolecularFunction	GO:0005230	extracellular ligand-gated ion channel activity	8.04e-07	21	74	STX1B, CHRNA6, GABRA3, GABRA4, GABRA6, GABRA1, GABRA2, GLRA1, GABRG1, GABRG2, GABRB2, GABRB3, GABRD, GRIA3, GRIA4, GRIK2, GRIN2A, GRIN1, GRIK5, GRIN2C, GRIN2B
MousePheno	MP:0002906	increased susceptibility to pharmacologically induced seizures	8.43e-07	26	74	MT3, CDK5R1, NEUROD2, NPY, CNR1, PLCL1, CACNA2D2, PTGS2, NEUROD6, FGF14, SLC4A3, SLC1A2, SCN1A, GABRA1, CIT, SLC9A6, GABRG2, GFAP, GRIK2, GRIK5, HTR2C, KCNQ2, KCNA2, NR4A3, SLC12A5, PLCB1
Drug	CID000002802	clonazepam	8.45e-07	24	83	MAOA, MCOLN1, CACNA2D1, NCL, POMC, PTCH1, ATN1, SLC4A3, GABRA3, GABRA4, GABRA6, GABRA1, GABRA2, GLRA1, GABRG1, GABRG2, GABRB2, GABRB3, GABRD, GAD2, GAD1, GPHN, IDE, ARHGEF9
MousePheno	MP:0001968	abnormal touch/ nociception	8.71e-07	49	189	ADCY1, CDK5R2, ADORA1, GRASP, CDK5R1, MAP1B, ARRB2, KIF1A, OPRL1, OPRM1, SLC17A7, SLC17A6, DST, CACNA1B, CACNA1A, NBL1, KLF7, MAPK6, PRKAR1B, CNR1, PRKCG, CLCN6, RGS4, DLG2, DLG4, EDNRB, PTGS2, PTGDS, NPEPPS, FXR2, TPH2, SLC6A4, S100A10, GABRA4, GABBR1, FMR1, TH, GNAQ, GNAZ, GRIA3, GRIA4, SSTR4, GRIK5, KCND2, KCNA6, KCNIP3, KIF1B, LMO7, SLC12A5
Drug	C006477	alphaxalone	8.99e-07	6	6	GABRA1, GABRA2, GABRG2, GABRB2, GABRB3, GABRD
GeneOntologyMolecularFunction	GO:0016917	GABA receptor activity	9.22e-07	12	27	GABRA3, GABRA4, GABRA6, GABRA1, GABRA2, GABBR1, GLRA1, GABRG1, GABRG2, GABRB2, GABRB3, GABRD
GeneOntologyCellularComponent	GO:0032839	dendrite cytoplasm	1.04e-06	8	12	OPRM1, CANX, MAPK8, MAPK1, SOD1, MAP2K4, GRIK2, UHMK1
GeneOntologyBiologicalProcess	GO:0030534	adult behavior	1.07e-06	25	100	MAFG, PAFAH1B1, CACNB4, CACNA1C, CACNA1A, NPY, CHD7, HIPK2, DRD2, EPHA4, SNCA, EPS8, SLC1A2, SCN8A, SCN1A, ATXN1, GLRA1, GABRG2, GRM2, GRIN1, HTR2C, KCNMA1, NTAN1, NR4A3, KLHL1
GeneOntologyCellularComponent	GO:0016604	nuclear body	1.07e-06	39	201	MAX, MDM2, MEF2C, PIAS1, CDC5L, SFRS18, HIPK1, PNN, DDX46, HDAC5, CREBBP, HIPK3, HR, DDX3X, HIPK2, DYRK1A, RBM39, NCOR2, SON, SFRS1, SFRS2, EWSR1, SFRS13A, CPSF6, NUDT21, RBM25, PSPC1, SLU7, NEAT1, HSPA1B, PRPF19, ZNF638, NACC2, SF3B1, CBX5, SRRM2, FYTTD1, TRIM8, ZBTB16
GeneOntologyBiologicalProcess	GO:0043242	negative regulation of protein complex disassembly	1.15e-06	16	47	ADD1, MAP1B, MAP1A, MAP2, MAPT, APC, SHROOM2, MID1, ARHGEF2, TMOD3, RDX, SPTBN1, GSN, TPM1, CLASP1, CLASP2
GeneOntologyBiologicalProcess	GO:0043269	regulation of ion transport	1.17e-06	29	127	ADCYAP1R1, ADORA1, CACNA1G, AKT1, ATP2B2, P2RY12, CACNB4, CACNA2D1, NEDD4, JPH3, CNR1, AKT3, PLCB4, PLCG1, SLC9A3R1, DLG1, HOMER1, PTGS2, DRD2, SLC8A1, SNCA, SGK1, IL1RAPL1, GJA1, GNAQ, GNAI2, MGEA5, HCRT, NCS1
GeneOntologyBiologicalProcess	GO:0031344	regulation of cell projection organization	1.21e-06	32	148	ACHE, AKT1, MAP1B, MAPT, MBP, APC, KALRN, ARHGEF1, NTRK3, NTRK2, CACNA1A, RTN4, CNR1, DBN1, DCC, PTEN, RAC1, SGK1, IL1RAPL1, CIT, CDC42EP1, RAPGEF4, HDAC2, DIXDC1, GSK3B, GRIN1, RUFY3, HMGB1, SYNE1, NCS1, LCN2, ERMN
MousePheno	MP:0000801	abnormal temporal lobe morphology	1.3e-06	56	230	CDK5R2, MT3, ZBTB20, CDK5R1, MAP1B, MAP2, MAPT, KALRN, DCLK1, MLL, ATP2B2, ATRX, PAFAH1B1, NCAM1, NEUROD1, NFIB, NFIA, NFIX, KLF7, CHRM1, CLCN3, CRKL, CRK, DAB1, DLG4, PTEN, NEUROD6, RAC1, PURA, SOD2, FOXG1, SNCA, SLC1A2, FABP7, FUS, CIT, CADM1, LEF1, GJA1, CACNG2, GNAQ, GM2A, TOP2B, GFAP, HDAC2, HPCA, HIF1A, SPEN, KIF2A, NR4A3, INPP4A, SUZ12, KIF1B, MYCBP2, PLCB1, AGTPBP1
Drug	C070081	fulvestrant	1.32e-06	44	212	AKT1, APOD, MGP, MMP15, SLC39A6, DST, NCL, DDX3Y, NFKBIA, TRAK2, NOV, CDKN1A, ARNT2, MAPK1, PRKCG, PER1, CREB1, PDGFA, PDGFRA, COMT, DHX9, RNF4, PTCH1, EIF5, SON, SFRS1, FOS, GH1, TMPO, GNB1, TOP2B, NUS1, TACC1, HSPA8, HSPA4, HMGB1, IGFBP4, TXNRD1, HSP90B1, KPNB1, KCNMA1, FYTTD1, LPL, TNPO1
Pathway	CK1PATHWAY	CK1PATHWAY	1.4e-06	10	17	CDK5R1, PRKAR1B, PRKAR1A, PRKAR2A, PRKAR2B, PRKACB, CSNK1D, DRD2, PPP1R1B, PLCB1
Drug	CID000071158	acamprosate	1.43e-06	22	74	MDM2, OPRL1, NR1D2, CRY1, PER1, GABRA3, GABRA4, GABRA6, GABRA1, GABRA2, FOS, GABRG1, GABRG2, GABRB2, GABRB3, GABRD, GRM2, GRM3, GRIN2A, GRINA, GRIN2C, GRIN2B
GeneOntologyBiologicalProcess	GO:0048008	platelet-derived growth factor receptor signaling pathway	1.51e-06	12	28	SGPL1, TIPARP, PDGFA, PDGFRA, PTEN, SNCA, F3, GAB1, TXNIP, SRC, JAK2, ZFAND5
GeneOntologyBiologicalProcess	GO:0051588	regulation of neurotransmitter transport	1.59e-06	16	48	ADORA1, NTRK2, CAMK2A, CACNA1B, CACNA1A, EDN3, DRD2, SNCA, GABBR1, STXBP1, STX1A, HCRT, GRIK5, GRIN2B, KCNMB4, HTR2C
GeneOntologyMolecularFunction	GO:0016879	ligase activity, forming carbon-nitrogen bonds	1.6e-06	46	255	FBXO9, HERC1, FBXL3, FBXW2, GMPS, UBA3, MDM2, ASS1, UBR3, ARIH1, HECTD1, BTD, PELI1, PIAS1, CBL, NEDD4, UBE2J1, UBR1, PJA1, KIAA0317, PET112L, FEM1B, RNF41, TRIP12, TTLL7, RNF14, DZIP3, ZRANB1, WWP1, RLIM, UBE2R2, UBE2W, UBR7, PRPF19, UBE2K, FBXO21, UBE2L3, UBE2V2, UBE3A, UBE2B, UBE2D3, UBE2G2, TTC3, HECW1, LMO7, FBXW11
GeneOntologyCellularComponent	GO:0008328	ionotropic glutamate receptor complex	1.62e-06	9	16	DLG4, EPS8, GRIA4, GRIK2, GRIN2A, GRIN1, GRIK5, GRIN2C, GRIN2B
MousePheno	MP:0001468	abnormal temporal memory	1.66e-06	30	95	ADCY1, ADCYAP1R1, MAP2, MAPT, KALRN, NTRK2, NRGN, KLF9, SLC17A7, CAMK2A, CACNB3, JPH3, TMOD2, MAPK1, PRKCG, CREB1, CREBBP, GIT1, FABP7, FOS, GNAI1, GABRD, HDAC2, GSK3B, GRIK2, GRIN2A, GRIN1, GRIN2C, SPEN, UBE3A
GeneOntologyBiologicalProcess	GO:0008344	adult locomotory behavior	1.67e-06	19	65	PAFAH1B1, CACNB4, CACNA1C, CACNA1A, CHD7, HIPK2, DRD2, EPHA4, SNCA, EPS8, SCN8A, SCN1A, ATXN1, GLRA1, GRM2, GRIN1, KCNMA1, NTAN1, KLHL1
Pathway	DREAMPATHWAY	DREAMPATHWAY	1.71e-06	9	14	POLR2A, PRKAR1B, PRKAR1A, PRKAR2A, PRKAR2B, PRKACB, CREB1, FOS, KCNIP3
Pathway	met_pathway	Signaling events activated by Hepatocyte Growth Factor Receptor (c-Met)	1.72e-06	18	51	AKT1, CBL, MAP2K2, MAPK8, MAPK1, CRKL, CRK, PDPK1, PLCG1, PIK3CA, PIK3R1, RAP1B, PTEN, PTK2B, MAP2K4, GAB1, FOS, SRC
Drug	CID000065914	abecarnil	1.72e-06	10	18	NPY, NKRF, GABRA4, GABRA6, GABRA1, GABRA2, GABRG1, GABRG2, GABRB2, HTR2C
Domain	PF00076	RRM_1	1.82e-06	34	143	SFRS12, NCL, CPEB2, CNOT4, CSTF2, HNRNPR, RBM39, ELAVL3, ELAVL2, EIF4B, CPEB4, TRA2B, SFRS1, SFRS2, EWSR1, SFRS13A, FUS, CPSF6, SYNCRIP, RBM25, CELF1, MYEF2, SSB, MSI2, HNRNPA3, HNRNPL, HNRNPF, RBM18, ZNF638, SPEN, PTBP2, TARDBP, RBM9, UHMK1
GeneOntologyMolecularFunction	GO:0035254	glutamate receptor binding	1.84e-06	9	16	CAMK2A, PLCG1, DLG1, DLG4, HOMER1, DRD2, CACNG2, GSK3B, GRIN1
MousePheno	MP:0001473	reduced long term potentiation	1.84e-06	33	110	ADCY1, ADCYAP1R1, MAPT, KALRN, NTRK2, OPRM1, PAK3, DGKE, CAMK2A, CACNA1B, NCAM1, JPH3, PINK1, MAPK9, PRKAR1B, PRKCG, PRKACB, CREB1, RAP1B, NEUROD6, EPHA4, SNCA, CPLX2, ATXN1, GABBR1, FOS, STX1A, GRIK2, GRIN2A, GRIN1, GRIN2B, UBE3A, HTR2C
GeneOntologyMolecularFunction	GO:0001883	purine nucleoside binding	1.92e-06	44	241	SACS, ABCA1, ABCB7, WNK1, ADORA1, AKT1, ABCD2, MAOA, ATP2B2, DNAJA3, DGKE, CHKA, PRPS1, MAP2K2, MAPK9, MAPK1, PRKAR1B, PRKAR1A, PRKAR2A, PRKAR2B, AKT3, PFKP, PFKL, PDK4, PDE1A, PDE2A, MAPK14, CSNK1D, DCK, RAP1B, RP2, RAB2A, PDE10A, MAP2K4, ABCB8, RAPGEF4, GPHN, SULT1A1, MAP3K7, ARL8B, GSK3B, RHOBTB3, RAB18, IDE
Pathway	PAR1PATHWAY	PAR1PATHWAY	1.93e-06	11	21	ADCY1, ARHGEF1, PIK3CA, PIK3R1, PTK2B, GNAQ, GNB1, GNAI1, GNA13, MAP3K7, PLCB1
GeneOntologyMolecularFunction	GO:0047485	protein N-terminus binding	2.07e-06	24	97	ACTN4, SYNGR3, EXOC4, PLEC, CSNK2A1, DCN, TBL1XR1, AKAP6, NCOR2, MORF4L1, SMARCE1, SNCA, ERCC4, RPS21, GLRX, STXBP1, STX1A, GRIN2C, HSPA1B, TPM1, KCNQ2, KCNB1, SRRM2, KCNIP2
GeneOntologyMolecularFunction	GO:0019887	protein kinase regulator activity	2.27e-06	23	91	WNK1, CDK5R2, CDK5R1, APC, CDKN1A, PRKAR1B, PRKAR1A, PKIA, PRKAR2A, PRKAR2B, TAOK3, TRIB2, FGF13, CCNY, RAPGEF4, GMFB, NRG3, CAMK2N2, YWHAG, HMGB1, PPP1R1B, TAOK1, KIDINS220
GeneOntologyBiologicalProcess	GO:0060078	regulation of postsynaptic membrane potential	2.37e-06	12	29	ADORA1, OPRM1, SNCA, ATXN1, GLRA1, HCRT, GRIK2, GRIN2A, GRIN1, GRIK5, GRIN2C, GRIN2B
GeneOntologyBiologicalProcess	GO:0007215	glutamate signaling pathway	2.37e-06	12	29	CDK5R1, HOMER1, GNAQ, GNAI2, GRM4, GRIA3, GRIA4, GRIK2, GRIN2A, GRIN1, GRIN2C, GRIN2B
Drug	D014028	Tobacco Smoke Pollution	2.43e-06	41	196	SIRPA, TMEM47, ADORA1, AKT1, PITPNC1, RND3, KITLG, BCL2L1, BCLAF1, PJA2, DNAJB6, CTGF, PIK3CA, MAPK14, RASGRF2, HIPK2, GGPS1, PTGS2, KIFC2, FGFR1, FGF14, SOD2, MAP2K4, FOS, USP53, TIMP3, GNAZ, GMFB, TP53BP2, TCF7L2, TTYH2, RBCK1, MSI2, HSPB1, ZKSCAN1, SF1, UBE2K, UBE3A, KIF5B, SHOC2, LIMS1
GeneOntologyBiologicalProcess	GO:0035264	multicellular organism growth	2.48e-06	26	111	ADD1, AKT1, SGPL1, APBA1, ACVR1C, ATRN, CREB1, CHD7, PIK3CA, CACNA2D2, ANKRD11, DLG1, PTCH1, DRD2, TNKS2, FGFR2, SOD1, SLC1A2, FKBP8, RPL29, GH1, CELF1, ZFX, PCSK1N, TENC1, GPAM
GeneOntologyMolecularFunction	GO:0005261	cation channel activity	2.52e-06	48	275	ACCN2, CACNA1G, SHROOM2, CHRNA6, MTMR6, KCNAB2, CACNB4, CACNB3, MCOLN1, CACNA1B, CACNA1C, CACNA1A, CACNB1, CACNB2, CACNA2D1, SCN3B, CACNA2D2, KCTD17, KCNIP4, SCN8A, SCN1A, SCN1B, CACNG2, CACNG3, GRIN2A, GRIN1, GRIN2C, GRIN2B, KCNMB4, TRPC5, KCNMA1, KCNQ2, KCNJ9, CUL5, KCND2, KCNC4, KCNC3, KCNC1, KCNB1, KCNF1, KCND3, KCNA6, KCNA2, HCN3, KCNIP2, KCNIP3, KCNAB1, CACNG4
GeneOntologyBiologicalProcess	GO:0035249	synaptic transmission, glutamatergic	2.61e-06	14	39	ADORA1, NTRK2, CACNB4, CACNA1A, CNR1, PTGS2, DRD2, GRM2, GRM3, GRIA4, GRIK2, GRIN1, GRIK5, SHC3
Drug	DB00690	Flurazepam	2.65e-06	7	9	GABRA3, GABRA4, GABRA6, GABRA1, GABRA2, GABRB2, GABRB3
GeneOntologyBiologicalProcess	GO:0090003	regulation of establishment of protein localization to plasma membrane	2.83e-06	6	7	AKT1, APPL1, PRKCI, PDPK1, PIK3R1, SORBS1
GeneOntologyBiologicalProcess	GO:0017156	calcium ion-dependent exocytosis	3.36e-06	15	45	CACNA1G, SYT7, CACNA1C, CACNA1A, VAMP3, RIMS2, CHP, RAPGEF4, GLRA1, SDF4, SCAMP5, STX1A, VAMP7, VAMP2, SYT1
Pathway	BADPATHWAY	BADPATHWAY	3.51e-06	11	22	ADCY1, AKT1, KITLG, BCL2L1, PRKAR1B, PRKAR1A, PRKAR2A, PRKAR2B, PRKACB, PIK3CA, PIK3R1
Drug	CID000107926	bretazenil	3.56e-06	11	23	MATK, RUSC1, GABRA4, GABRA6, GABRA1, GABRA2, GABRG1, GABRG2, GABRB2, SST, HTR2C
GeneOntologyBiologicalProcess	GO:0031111	negative regulation of microtubule polymerization or depolymerization	3.57e-06	10	21	MAP1B, MAP1A, MAP2, MAPT, APC, MID1, ARHGEF2, SGK1, CLASP1, CLASP2
GeneOntologyMolecularFunction	GO:0008066	glutamate receptor activity	3.58e-06	12	30	GABBR1, GRM2, GRM3, GRM4, GRIA3, GRIA4, GRIK2, GRIN2A, GRIN1, GRIK5, GRIN2C, GRIN2B
MousePheno	MP:0001177	atelectasis	3.59e-06	22	61	NFIB, MAPK6, PDGFA, FGFR2, MAN1A2, FOXG1, SLC5A3, TH, IMPAD1, TOP2B, GAD1, GRIN1, NR3C1, HMGB1, HIF1A, TRPS1, NDST1, KIF5A, SYNE1, KCNQ2, LPL, SLC12A5
GeneOntologyCellularComponent	GO:0030662	coated vesicle membrane	3.68e-06	26	115	SYNPR, AP2A1, SYT7, HIP1R, ARCN1, SLC17A7, SLC17A6, PI4K2A, SV2B, SCAMP1, DRD2, TMED2, SLC2A3, GABRA2, SEC24B, SCAMP5, GAD2, STX1A, VAMP2, VAMP1, SYT1, RPH3A, EPN2, COPG2, SYT2, SYT11
GeneOntologyBiologicalProcess	GO:0051899	membrane depolarization	3.93e-06	16	51	ADORA1, CACNA1G, CHRNA6, OPRM1, CACNA1A, SNCA, ATXN1, CACNG2, MGEA5, HCRT, GRIK2, GRIN2A, GRIN1, GRIK5, GRIN2C, GRIN2B
MousePheno	MP:0000812	abnormal dentate gyrus morphology	4.13e-06	25	75	CDK5R2, CDK5R1, MAP1B, MAPT, DCLK1, MLL, ATRX, PAFAH1B1, NEUROD1, NFIB, NFIX, KLF7, CRKL, CRK, DAB1, PTEN, NEUROD6, RAC1, FOXG1, FABP7, CIT, LEF1, GJA1, GFAP, HDAC2
MousePheno	MP:0009748	abnormal behavioral response to addictive substance	4.26e-06	23	66	GRASP, APBA1, AQP4, OPRL1, OPRM1, CACNA1B, CNR1, PRKCG, PRKAR2B, CREB1, RGS4, DLG4, HOMER1, DRD2, SLC18A2, TH, GNAZ, GRK6, GRIN1, NR3C1, KCNC3, KCNC1, PPP1R1B
GeneOntologyBiologicalProcess	GO:0017157	regulation of exocytosis	4.3e-06	17	57	STX1B, CACNA1G, SYT7, CACNA1A, RAB27B, SNCA, IL1RAPL1, RAPGEF4, SCAMP5, STXBP1, STX1A, VAMP2, SYT1, RAB3C, GRIK5, PCLO, NCS1
Pathway	P00043	Muscarinic acetylcholine receptor 2 and 4 signaling	4.39e-06	17	49	ACHE, STX1B, CACNA2D1, PRKAR1B, PRKAR1A, PRKAR2A, PRKAR2B, VAMP3, GNG12, GNG2, GNB1, GNAI1, GNAI2, STX1A, VAMP2, VAMP1, KCNJ9
Pathway	hsa04720	Long-term potentiation	4.39e-06	22	75	ADCY1, ARAF, CAMK2D, CAMK2A, CACNA1C, PPP1R12A, MAP2K2, MAPK1, PRKCG, PRKACB, PPP3R1, PPP3CB, CREBBP, PLCB4, RAP1B, CHP, GNAQ, GRIN2A, GRIN1, GRIN2C, GRIN2B, PLCB1
GeneOntologyBiologicalProcess	GO:0032870	cellular response to hormone stimulus	4.42e-06	33	164	ADCY1, AKT1, APPL1, PRKCI, PRKAR1B, PRKAR1A, PRKCD, PRKAR2A, PRKAR2B, PRKACB, HDAC5, AKT3, PDPK1, PIK3R1, ZFP106, GNG12, GNG13, EIF4EBP2, SGK1, GNG2, GAB1, FOS, BAIAP2, PHIP, GH1, GNB1, SORBS1, SRC, GRB10, IGF2, UBE2B, JAK2, GPAM
Pathway	nfat_3pathway	Role of Calcineurin-dependent NFAT signaling in lymphocytes	4.43e-06	18	54	MAPK9, MAPK8, PRKCG, PRKCD, PPP3R1, PPP3CB, CREBBP, RCAN2, MAPK14, CSNK2A1, RCAN1, CHP, FKBP8, GSK3B, YWHAG, YWHAZ, YWHAB, KPNB1
Pathway	P00042	Muscarinic acetylcholine receptor 1 and 3 signaling	4.43e-06	18	54	ACHE, STX1B, CHRM1, PRKCI, PRKCG, PRKCD, VAMP3, GNG12, GNG2, GNB1, STX1A, VAMP2, VAMP1, GRIN2A, GRIN1, GRIN2C, GRIN2B, KCNQ2
Pathway	fgf_pathway	FGF signaling pathway	4.43e-06	18	54	AKT1, CAMK2A, NCAM1, CBL, MAPK1, PDPK1, PLCG1, PIK3CA, PIK3R1, CTTN, PTK2B, FGFR1, FGFR2, SSH1, SDC2, GAB1, FOS, SRC
MousePheno	MP:0003997	tonic-clonic seizures	4.46e-06	20	53	CELF4, NEUROD2, CLCN3, PLP1, DBP, PTGS2, PTEN, SCN1A, GABBR1, ATE1, GNAQ, B4GALNT1, GAD2, TEF, GRIN1, UBE3A, HTR2C, KCNQ2, NR4A3, SLC12A5
Pathway	pi3kplctrkpathway	Trk receptor signaling mediated by PI3K and PLC-gamma	4.52e-06	14	35	AKT1, CAMK2A, PRKCD, CREB1, PDPK1, PLCG1, PIK3CA, PIK3R1, GAB1, SRC, GSK3B, YWHAG, YWHAZ, YWHAB
Pathway	GPCRPATHWAY	GPCRPATHWAY	4.52e-06	14	35	ADCY1, PRKAR1B, PRKAR1A, PRKAR2A, PRKAR2B, PRKACB, PPP3CB, CREB1, PLCG1, FOS, GNAQ, GNB1, GNAI1, SYT1
GeneOntologyMolecularFunction	GO:0019911	structural constituent of myelin sheath	4.99e-06	5	5	MBP, MAL, MOBP, TSPAN2, PLP1
MousePheno	MP:0000860	abnormal primary somatosensory cortex morphology	5e-06	10	16	ADCY1, NTRK2, NEUROD6, EPHA4, RAC1, SLC6A4, LEF1, GRIN1, GRIN2B, BHLHE22
MousePheno	MP:0009750	impaired behavioral response to addictive substance	5.15e-06	16	37	GRASP, APBA1, AQP4, OPRL1, OPRM1, CACNA1B, CNR1, PRKCG, RGS4, DLG4, DRD2, SLC18A2, TH, GNAZ, GRIN1, PPP1R1B
Drug	D011189	Potassium Chloride	5.34e-06	12	28	MAPT, CAMK2D, MAPK1, CNR1, CREB1, NRXN2, PTK2B, RAPGEF4, SRC, KCND2, KCNC1, SLC12A5
Pathway	hsa04012	ErbB signaling pathway	5.36e-06	24	87	AKT1, ARAF, PAK3, CAMK2D, CAMK2A, CBL, CDKN1A, MAP2K2, MAPK9, MAPK8, MAPK1, PRKCG, CRKL, CRK, AKT3, PLCG1, PIK3CA, PIK3R1, MAP2K4, GAB1, NRG3, SRC, GSK3B, SHC3
Drug	CID000009528	flurothyl	5.56e-06	16	47	TRIM37, DLG4, GABRA4, GABRA6, GABRA1, GABRA2, FOS, GABRG1, GABRG2, GABRB2, SSR1, GRIN2A, GRIN1, GRINA, GRIN2C, GRIN2B
Drug	C091518	1-(4-ethynylphenyl)-4-propyl-2,6,7-trioxabicyclo(2.2.2)octane	5.76e-06	6	7	GABRA3, GABRA1, GABRA2, GABRG2, GABRB2, GABRB3
Drug	CID000005657	veratridine	5.87e-06	38	182	ACHE, ACCN2, ADCY1, ADORA1, CACNA1G, CHRNA6, CACNB4, CACNB3, CACNA1B, CACNA1C, CACNA1A, CACNB1, CACNB2, CACNA2D1, NPY, MLEC, CHRM1, POMC, PDHA1, SCN3B, CACNA2D2, DRD2, PTK2B, SCN1B, ABCB8, CIT, FOS, TH, CACNG2, GAD2, SST, GRIN2A, GRIK5, GRINA, GRIN2C, GRIN2B, VIP, CACNG4
Pathway	VIPPATHWAY	VIPPATHWAY	5.94e-06	12	27	NFKBIA, PRKAR1B, PRKAR1A, PRKAR2A, PRKAR2B, PRKACB, PPP3CB, PLCG1, EGR3, GNAQ, SYT1, VIP
Drug	CID000001257	quinpirole	5.99e-06	32	142	ADCY1, OPRL1, NPY, CHRM1, POMC, CNR1, PRKAR1A, PRKAR2A, PRKAR2B, PRKACB, LMBR1, HDAC5, CREB1, ZFP106, DRD2, SLC18A2, PTK2B, CIT, FOS, TH, GAD1, HDAC2, GRM3, SST, GRIA3, GRIA4, GRIN2A, GRINA, GRIN2C, GRIN2B, HTR2C, PPP1R1B
Pathway	h_edg1Pathway	Phospholipids as signalling intermediaries	6.09e-06	11	23	ADCY1, AKT1, MAPK1, PDGFA, PDGFRA, RAC1, GNB1, GNAI1, SRC, ITGAV, PLCB1
Pathway	MPRPATHWAY	MPRPATHWAY	6.09e-06	11	23	ADCY1, MAPK1, PRKAR1B, PRKAR1A, PRKAR2A, PRKAR2B, PRKACB, CAP1, GNB1, GNAI1, SRC
Drug	CID006857364	phosphatidylinositol 4-phosphate	6.09e-06	41	203	ACTB, AKT1, APBA1, NRGN, EEA1, DGKE, EPN1, DNM3, CHRM1, PRKCI, PRKCG, PRKCD, PDGFRA, COL4A3BP, DNM1L, PLCB4, PLCG1, PIK3C2A, PIK3CA, PIK3R1, PIP4K2A, AGK, VAPB, RDX, DGKG, DGKB, DNM1, GOSR1, EPB41L2, RAC1, ETV5, IL1RAPL1, TNS1, SRC, GSN, HPCA, TRPC5, PIP5K1C, NCS1, GPAM, PLCB1
MousePheno	MP:0001905	abnormal dopamine level	6.62e-06	22	63	MAOA, APBA1, AQP4, OPRL1, BCL2L1, PINK1, CHRM1, POMC, MAPK9, SLC23A2, COMT, DBP, LPAR1, DRD2, SLC18A2, SNCA, SNCB, TH, VAV3, TEF, FOXP2, GRM2
Pathway	METPATHWAY	METPATHWAY	6.7e-06	14	36	MAP2K2, MAPK8, MAPK1, CRKL, CRK, PIK3CA, PIK3R1, RAP1B, RASGRF2, PTEN, PTK2B, GAB1, FOS, SRC
GeneOntologyBiologicalProcess	GO:0006376	mRNA splice site selection	6.73e-06	9	18	CELF4, SFRS1, SFRS13A, CELF2, CELF1, SLU7, SF1, PTBP2, SF3A2
GeneOntologyBiologicalProcess	GO:0045664	regulation of neuron differentiation	6.75e-06	38	205	ACHE, AKT1, CDK5R1, MAP1B, MAPT, MBP, KALRN, ARHGEF1, NTRK3, NTRK2, PBX1, CACNA1A, RTN4, NEUROD1, CNR1, DBN1, DCC, PTEN, ATN1, FOXG1, SGK1, ETV5, IL1RAPL1, CIT, RAPGEF4, TIMP2, HDAC2, DIXDC1, GSK3B, GRIN1, RUFY3, NLGN1, YWHAG, HMGB1, PRPF19, TTC3, SYNE1, NCS1
Drug	CID000003386	fluoxetine	6.8e-06	44	225	SERPINA3, ADAR, CACNA1G, MAOA, ARL4D, CHRNA6, SLC17A7, SLC17A6, NOVA2, NPY, CHRM1, POMC, MAPK1, CPD, CRKL, CREB1, DBN1, NKRF, FXR2, DUSP8, DRD2, TPH2, SLC18A2, SLC6A4, PDE10A, GABRA3, GABRA4, GABRA6, GABRA1, GABRA2, FMR1, FOS, TH, CLDN5, GABRG1, GABRG2, GABRB2, GABRB3, GABRD, GSK3B, NR3C1, HTR2C, KCNC1, PPP1R1B
MousePheno	MP:0009956	abnormal cerebellar layer morphology	6.81e-06	49	202	CDK5R2, ABCD2, CDK5R1, MAP1B, MAP2, ANK3, MDM2, MID1, MLL, ATP2B2, ATP1B2, NTRK2, PAFAH1B1, CACNA1A, NEUROD1, NFIB, NFIA, PI4K2A, CP, CRKL, CRK, ATF2, PDHA1, DNM1L, DAB1, CACNA2D2, RORA, QKI, PTEN, PURA, MAP2K4, SCN8A, ATXN1, IL1RAPL1, CIT, FMR1, GJA1, GM2A, B4GALNT1, FOXP2, HYOU1, GRIN2C, CBLN3, UGCG, TXNRD1, TRIM2, KLHL1, INPP4A, AGTPBP1
GeneOntologyMolecularFunction	GO:0015457	auxiliary transport protein activity	6.9e-06	19	71	WNK1, TMPRSS3, KCNAB2, CACNB2, NEDD4, NPY, SCN3B, SLC9A3R2, NRXN2, NRXN1, DLG1, ARPP19, CHP, STX1A, GRM2, GRM3, ALG10, KCNIP3, KCNAB1
GeneOntologyBiologicalProcess	GO:0051129	negative regulation of cellular component organization	6.97e-06	39	213	SACS, ADD1, MAP1B, MAP1A, MAP2, MAPT, MBP, APC, SHROOM2, MID1, ARHGEF2, ARHGEF1, PACSIN1, RTN4, TMOD3, RDX, PTEN, RAC1, EIF4EBP2, SNCA, ERCC4, SGK1, CIT, SCAMP5, HDAC2, SPTBN1, GSK3B, GSN, HSPA1B, RUFY3, EIF2C2, HMGA1, HMGB1, UBE2B, TTC3, TPM1, TPR, CLASP1, CLASP2
Interaction	HPRD:00449	Cyclin dependent kinase 5	6.99e-06	18	50	CDK5R2, CDK5R1, MAPT, MEF2A, CCNG1, CHN1, PPP1R2, CSNK1D, DAB1, DNM1, PURA, STXBP1, STX1A, SRC, GSK3B, GRIN2A, PIP5K1C, PPP1R1B
Pathway	trkrpathway	Neurotrophic factor-mediated Trk receptor signaling	7.49e-06	19	61	MATK, RHOG, DNAJA3, NTRK3, NTRK2, ELMO1, PRKCI, MAPK1, CRKL, CRK, PLCG1, PIK3CA, PIK3R1, RAP1B, DNM1, RAC1, GAB1, DYNLT1, SHC3
Drug	CID000005114	ryanodine	7.54e-06	45	233	ATP2B2, ATP2B1, CANX, CAMK2D, CACNA1B, CACNA1C, CACNA1A, CACNB1, CACNB2, CACNA2D1, KRIT1, CD38, CHRM1, PRKCI, PRKAR1A, PRKCG, PRKCD, PRKAR2A, PRKAR2B, PRKACB, PPP3R1, CREB1, CAMKV, PLCB4, HOMER1, EDN3, AKAP6, SLC8A1, FKBP5, FKBP8, RAPGEF4, GUCY1B3, MYEF2, GRM2, GRM3, GRM4, GRIA3, GRIA4, HSPA4, KCNMB4, KCNMA1, KCND2, KCND3, BRD4, ATP2C1
Drug	CID000001775	phenytoin	7.75e-06	43	219	ACHE, ACCN2, CACNA1G, TRIM37, MAP1B, MAP2, APOD, MGP, BMP1, CACNB4, CACNB3, CACNA1B, CACNA1C, CACNA1A, CACNB1, CACNB2, CACNA2D1, NFKBIA, NOVA2, MAPK1, PCYT1A, SCN3B, CACNA2D2, DMWD, QKI, PTCH1, PTN, FGFR2, CYP46A1, SLC2A1, SCN1B, ABCB8, FLRT2, RPS27, CACNG2, CACNG3, ATCAY, CELF1, NR3C1, VEGFB, TTR, KCNA2, CACNG4
Drug	C496879	103D5R	8.09e-06	7	10	ACTB, AKT1, NFKBIA, MAPK8, MAPK1, SLC2A1, HIF1A
GeneOntologyBiologicalProcess	GO:0051259	protein oligomerization	8.11e-06	41	230	ACHE, AQP4, KCNAB2, OGT, GOPC, ATL2, PRKAR2A, PFKP, PFKL, PARVA, HR, NRXN1, SRR, CAB39, CEP57, SOD2, SLC1A1, GABRA6, GLRA1, OLFM1, GJB1, GJA1, ATL1, GPHN, STK11, SHANK3, SYT1, NLGN1, YWHAB, IDE, NACC2, SBF2, KCNMA1, KCND2, KCNB1, JUP, KCNA2, IRAK1, KCNIP2, LIMS1, LCN2
MousePheno	MP:0008415	abnormal neurite morphology	8.18e-06	43	170	ABCA2, ABCD2, MAP1B, MAPT, MBP, KALRN, DCLK1, NTRK2, SLC17A7, DST, CAMK2A, RNF160, CACNA1A, NCAM1, HAPLN2, POU3F1, PI4K2A, CLCN6, DNM1L, PLP1, PLEC, CACNA2D2, DLG1, QKI, EPHA4, EPHA7, SNCA, SCN1B, GABBR1, FMR1, FOS, FJX1, FOXP2, GRIN2B, ZNF24, UGCG, UBE3A, TYROBP, KLC1, TRIM2, SBF2, KIF2A, ITGB4
Pathway	PHOSPHATIDYLINOSITOL_SIGNALING_SYSTEM	PHOSPHATIDYLINOSITOL_SIGNALING_SYSTEM	8.23e-06	24	89	CDS2, AKT1, BMPR1A, DGKE, PRKAR1B, PRKAR1A, PRKCG, PRKCD, PRKAR2A, PRKAR2B, PRKACB, COL4A3BP, PLCB4, PLCG1, PIK3C2A, PIK3CA, CSNK2A1, DGKG, DGKB, STK11, ITPKA, INPP4A, PLCB1, CLK4
Interaction	115091	Biochemical Activity	8.51e-06	10	18	AKT1, ARHGAP32, CRKL, CRK, PLCG1, PIK3R1, RAC1, GAB1, SRC, GRIN2B
Drug	DB00996	Gabapentin	9.16e-06	5	5	ADORA1, BCAT1, CACNA1B, CACNA2D1, CACNA2D2
Drug	D008140	Lorazepam	9.16e-06	5	5	GABRA3, GABRA4, GABRA1, GABRA2, GABRG2
Pathway	s1p_s1p3_pathway	S1P3 pathway	9.42e-06	12	28	AKT1, MAPK1, AKT3, RAC1, GNAQ, GNAZ, GNAI1, GNAI2, GNA13, SRC, JAK2, ITGAV
GeneOntologyCellularComponent	GO:0034707	chloride channel complex	9.43e-06	16	55	CLIC4, ANO6, ANO3, GABRA3, GABRA4, GABRA6, GABRA1, GABRA2, GLRA1, TTYH3, GABRG1, GABRG2, GABRB2, GABRB3, GABRD, TTYH2
GeneOntologyBiologicalProcess	GO:0051046	regulation of secretion	9.63e-06	48	288	ACHE, ADORA1, STX1B, CACNA1G, SYT7, ACVR1C, CHRNA6, NTRK2, CAMK2A, CACNA1B, CACNA1A, RTN4, CD38, NEUROD1, PINK1, MAPK9, CNR1, CREB1, PFKL, PCSK1, CHD7, EDN3, DRD2, RAB27B, SNCA, IL1RAPL1, GABBR1, RAPGEF4, CADM1, SCAMP5, TCF7L2, STXBP1, STX1A, VAMP2, MGEA5, SYT1, HCRT, RAB3C, SRC, GRIK5, GRIN2B, SERP1, KCNMB4, PCLO, HTR2C, JAK2, NCS1, GPAM
GeneOntologyBiologicalProcess	GO:0060627	regulation of vesicle-mediated transport	1.02e-05	20	79	STX1B, CACNA1G, SYT7, CDH13, PTEN, DRD2, RAB27B, RAB5C, SNCA, IL1RAPL1, RAPGEF4, STXBP1, STX1A, VAMP2, SYT1, RAB3C, EPN2, PCLO, SYNE1, NCS1
Pathway	pdgfrapathway	PDGFR-alpha signaling pathway	1.02e-05	11	24	CRKL, CRK, PDGFA, PDGFRA, PLCG1, PIK3CA, PIK3R1, CSNK2A1, FOS, JAK1, ITGAV
MousePheno	MP:0001523	impaired righting response	1.03e-05	28	93	ACHE, MAOA, APLP2, SLC6A5, ATP2B2, ATP1B2, NTRK2, DST, CACNB4, RNF160, CACNA1A, CHD7, DAB1, RORA, DNAJC5, SOD2, MAP2K4, SCN1A, GLRA1, CACNG2, B4GALNT1, FOXP2, VAMP1, ATCAY, GRIN1, ZIC1, UGCG, INPP4A
Pathway	P04374	5HT2 type receptor mediated signaling	1.05e-05	18	57	CACNB4, CACNB3, CACNB1, CACNB2, PRKCI, PRKCG, PRKCD, PLCG1, PLCL1, VAMP3, GNG12, SLC18A2, SLC6A4, GNG2, GNB1, VAMP2, VAMP1, HTR2C
Drug	CID000003689	ifenprodil	1.05e-05	20	71	ADORA1, AQP4, KITLG, SLC6A5, OPRL1, CREB1, RASGRF2, SLC1A1, GLRA1, GRM2, GRM3, GRIA3, GRIA4, GRIN2A, GRIN1, GRIK5, GRINA, GRIN2C, GRIN2B, TYROBP
MousePheno	MP:0009712	impaired conditioned place preference behavior	1.07e-05	10	17	GRASP, OPRM1, CACNA1B, POMC, CNR1, SLC18A2, SLC6A4, FOS, GRIN1, PPP1R1B
GeneOntologyBiologicalProcess	GO:0016358	dendrite development	1.09e-05	19	73	ACHE, MAP1B, MAP2, KALRN, DCLK1, NTRK2, CACNA1A, KLF7, DBN1, RAC1, CELSR2, ACSL4, SGK1, CIT, RAPGEF4, GSK3B, GRIN1, SYNE1, KLHL1
GeneOntologyMolecularFunction	GO:0005234	extracellular-glutamate-gated ion channel activity	1.16e-05	9	19	STX1B, GRIA3, GRIA4, GRIK2, GRIN2A, GRIN1, GRIK5, GRIN2C, GRIN2B
Pathway	P05731	GABA-B receptor II signaling	1.21e-05	13	33	ADCY1, CACNA1G, CACNA1B, CACNA1A, PRKAR1B, PRKAR1A, PRKAR2A, PRKAR2B, GNG12, GNG2, GABBR1, GNB1, GNAI1
GeneOntologyBiologicalProcess	GO:0048167	regulation of synaptic plasticity	1.25e-05	20	80	ADORA1, MAP1B, ATP2B2, CAMK2A, CD38, CPEB1, DBN1, DLG4, PTGS2, DRD2, SNCA, STXBP1, GSK3B, GRIK2, GRIN2A, GRIN1, GRIN2C, GRIN2B, YWHAG, NPTN
MousePheno	MP:0001362	abnormal anxiety-related response	1.31e-05	43	173	ADCYAP1R1, ADORA1, MAOA, MAPT, KALRN, ARAF, NTRK2, SLC17A7, CAMK2A, CACNA1B, CACNA1C, NPY, PRKCG, CLCN6, COMT, SERPINI1, GIT1, NPEPPS, DRD2, TPH2, SLC6A4, EHMT2, CPLX2, SLC2A3, FABP7, SCN8A, S100A10, GABBR1, FMR1, FOS, TH, GABRG2, GABRD, GAD2, DLGAP3, GRIA3, GRIN1, NR3C1, IDS, TRPC5, NTAN1, RASD2, ARHGEF9
Drug	D024505	Tocopherols	1.33e-05	20	72	CDK5R1, ARF3, MCL1, ATP1B2, BCL2L1, RAB6B, NAPB, DNAJC5, FGFR1, FGFR2, SNCA, SNCB, CPLX2, STXBP1, STX1A, VAMP2, VAMP1, GRIN1, TTC3, SYT11
GeneFamily	KCN	Potassium channels	1.37e-05	15	88	KCNAB2, KCNMB4, KCNMA1, KCNQ2, KCNJ9, KCND2, KCNC4, KCNC3, KCNC1, KCNB1, KCNF1, KCND3, KCNA6, KCNA2, KCNAB1
Drug	CID000004737	pentobarbital	1.39e-05	43	224	ACCN2, ADORA1, TRIM37, CHRNA6, OPRL1, OPRM1, AASDH, CALD1, CACNA2D1, APPL1, MARCH7, NPY, POMC, PRKCI, MAPK1, PRKCG, PRKCD, SCN3B, EDN3, SLC2A1, SCN1B, ABCB8, GABRA3, GABRA4, GABRA6, GABRA1, GABRA2, FOS, GLRA1, GABRG1, GABRG2, GABRB2, GABRB3, GABRD, GRM3, SST, GRIA3, GRIA4, GRIK2, GRIN2A, GRINA, GRIN2C, GRIN2B
Drug	CID000010413	gamma-hydroxybutyrate	1.42e-05	27	115	MOBP, PPHLN1, MAPK9, MAPK8, MAPK6, MAPK1, NLK, MAPK14, RNF130, NRXN2, GABRA3, GABRA4, GABRA6, GABRA1, GABRA2, GABRG1, GABRG2, GABRB2, GABRB3, GABRD, HBA2, HCRT, GRIN2A, GRINA, GRIN2C, GRIN2B, CYGB
GeneOntologyBiologicalProcess	GO:0001508	regulation of action potential	1.46e-05	22	94	MBP, MAL, POU3F1, CNR1, PLP1, QKI, SOD1, SCN8A, SCN1A, GLRA1, CLDN5, GNAQ, TF, GRIK2, GRIN2A, GRIN2B, GJC3, KCNMB4, UGT8, SBF2, KCNMA1, KCND2
Pathway	PYK2PATHWAY	PYK2PATHWAY	1.46e-05	12	29	MAP2K2, MAPK8, MAPK1, CRKL, PLCG1, MAPK14, RAC1, PTK2B, MAP2K4, GNAQ, SYT1, SRC
Pathway	P04394	Thyrotropin-releasing hormone receptor signaling	1.46e-05	17	53	CACNB4, CACNB3, CACNA1B, CACNA1A, CACNB1, CACNB2, PRKCI, PRKCG, PRKCD, PLCG1, PLCL1, VAMP3, GNG12, GNG2, GNB1, VAMP2, VAMP1
Drug	CID005361323	progabide	1.48e-05	14	40	QKI, PTCH1, DRD2, GABRA3, GABRA4, GABRA6, GABRA1, GABRA2, GABRG1, GABRG2, GABRB2, GABRB3, GABRD, GAD2
GeneOntologyBiologicalProcess	GO:0007409	axonogenesis	1.49e-05	45	268	ACHE, ACTB, ADCY1, ALCAM, CDK5R1, MAP1B, MAPT, MBP, ANK3, APC, KALRN, DCLK1, ARHGEF1, BAI1, NTRK3, PAFAH1B1, DST, CACNA1A, RTN4, BCL11B, KLF7, CREB1, DCC, NRXN1, DRD2, EPHA4, EPHA7, RAC1, FGFR2, FOXG1, BAIAP2, TOP2B, ATL1, STXBP1, TBR1, STK11, DIXDC1, GRIN1, RUFY3, NTNG1, KIF5C, PIP5K1C, JAK2, MYCBP2, DSCAML1
Pathway	cxcr3pathway	CXCR3-mediated signaling events	1.49e-05	15	43	AKT1, MAP2K2, MAPK1, PDPK1, PIK3CA, MAPK14, PIK3R1, DNM1, RICTOR, GNG2, GNAZ, GNB1, GNAI1, GNAI2, SRC
Pathway	ST_DIFFERENTIATION_PATHWAY_IN_PC12_CELLS	ST_DIFFERENTIATION_PATHWAY_IN_PC12_CELLS	1.5e-05	16	48	AKT1, MAP1B, MAPK9, MAPK8, MAPK1, CRKL, CREB1, CREBBP, PIK3CA, PIK3R1, RASGRF2, EGR3, MAP2K4, TH, GNAQ, SRC
Pathway	cxcr4_pathway	CXCR4-mediated signaling events	1.55e-05	25	98	AKT1, ARRB2, UBQLN1, CRK, PDPK1, PIK3CA, PIK3R1, RAP1B, DNM1, RICTOR, PTEN, RAC1, PTK2B, SSH1, GNG2, GNAZ, GNB1, GNAI1, GNAI2, GNA13, GRK6, SRC, JAK2, ITGAV, PLCB1
Pathway	h_PDZsPathway	Synaptic Proteins at the Synaptic Junction	1.55e-05	9	17	ADD1, ANK3, NCAM1, DLG1, DLG2, DLG4, SPTBN1, GRIN1, PCLO
MousePheno	MP:0001898	abnormal long term depression	1.56e-05	22	66	CDK5R1, NRGN, CAMK2A, NCAM1, PINK1, CHRM1, PRKAR1B, CNR1, PRKACB, PPP3R1, PLCB4, DRD2, FMR1, GNAQ, GFAP, FOXP2, GRM2, GRIA3, GRIN1, GRIN2B, NR3C1, ARHGEF9
GeneOntologyCellularComponent	GO:0005938	cell cortex	1.61e-05	32	169	ACTB, ACTN4, ADD3, SHROOM2, PAFAH1B1, CALD1, NCL, NEDD4, ARHGAP32, MAP2K2, EXOC4, PRKCI, CTGF, LANCL2, DLG4, EPB41L2, CTTN, MARK2, PTK2B, FGFR2, SNCA, CAP1, TMOD1, GM2A, SPTBN1, CLASP1, ITGB4, FNBP1, CLASP2, ARHGEF9, LASP1, EXOC6B
Drug	D001556	Lindane	1.66e-05	38	190	ACHE, ACLY, ACO2, ADD3, ACVR1C, KLF9, P4HA1, OGT, SLC4A4, NFIB, NFIA, NFIX, POMC, CDKN1A, MAP2K2, PJA2, MAPK1, PRKACB, CPD, DCN, PSMB3, RAD23A, EIF5, SERINC3, DNAJC5, SGK1, SFRS2, SDC4, GABRA1, GABRA2, RALGAPA1, GJA1, GABRG2, GABRB2, GABRB3, SULT1A1, NR3C1, HSPA1A
GeneOntologyBiologicalProcess	GO:0010959	regulation of metal ion transport	1.67e-05	19	75	ADCYAP1R1, ADORA1, CACNA1G, CACNA2D1, JPH3, PLCB4, PLCG1, DLG1, PTGS2, DRD2, SLC8A1, SNCA, IL1RAPL1, GJA1, GNAQ, GNAI2, MGEA5, HCRT, NCS1
Drug	CID000003878	lamotrigine	1.68e-05	27	116	ACCN2, CACNA1G, MAOA, CACNB4, CACNB3, CACNA1B, CACNA1C, CACNA1A, CACNB1, CACNB2, CACNA2D1, SCN3B, CACNA2D2, PTCH1, SCN1B, ABCB8, GABRA1, NAV1, CACNG2, CACNG3, GRM3, GRIA4, GRIN2A, GRINA, GRIN2C, GRIN2B, CACNG4
MousePheno	MP:0002888	abnormal NMDA-mediated synaptic currents	1.71e-05	11	21	CACNB3, NRXN2, NRXN1, DLG4, EPS8, FABP7, DLGAP3, GRIN2A, GRIN1, GRIN2C, GRIN2B
Drug	CID000001650	dihydrokainate	1.72e-05	22	85	SLC17A7, DGKG, DGKB, DLG4, SLC6A13, SLC1A6, SLC1A1, SLC1A2, FOS, GFAP, GRM2, GRM3, GRM4, GRIA4, GRIK2, GRIN2A, ARL6IP5, GRIK5, GRINA, GRIN2C, GRIN2B, HMGB1
MousePheno	MP:0008911	induced hyperactivity	1.74e-05	7	9	OCA2, OPRM1, CACNA2D2, SRR, TPH2, EHMT2, FABP7
GeneOntologyBiologicalProcess	GO:0048489	synaptic vesicle transport	1.75e-05	14	45	EEA1, SV2B, DLG4, SNCA, ITSN1, SH3GL2, CPLX2, STXBP1, STX1A, VAMP2, GRIK5, RPH3A, NLGN1, PCLO
MousePheno	MP:0001463	abnormal spatial learning	1.78e-05	39	153	ACCN2, ADCY1, CDK5R1, MAPT, APOD, ADAM11, NTRK2, NRGN, OPRL1, OPRM1, PAFAH1B1, CAMK2A, CACNA1B, NCAM1, TMOD2, UBR1, MAPK1, PRKCG, CREB1, DLG4, FXR2, EIF4EBP2, PTPRD, CPLX2, ATXN1, FMR1, FOS, BAIAP2, TIMP3, GRIN2A, GRIN1, HIF1A, UBE3A, HTR2C, NTAN1, KCNIP3, KCNAB1, ARHGEF9, PLCB1
Pathway	ncadherinpathway	N-cadherin signaling events	1.78e-05	13	34	MAPK8, CNR1, PLCG1, PIK3CA, PIK3R1, CTTN, RAC1, FGFR1, GJA1, GSN, KIF5B, PIP5K1C, JUP
Pathway	erbb1_downstream_pathway	ErbB1 downstream signaling	1.78e-05	28	117	AKT1, MEF2C, ARF4, MAP2K2, MAPK9, MAPK8, MAPK1, PRKCD, CREB1, ATF2, ARPC3, ARPC1B, PDPK1, PIK3CA, PIK3R1, RICTOR, RIN1, RAC1, EPS8, MAP2K4, GAB1, RPS6, FOS, BAIAP2, SRC, YWHAG, YWHAZ, YWHAB
Pathway	P05912	Dopamine receptor mediated signaling	1.93e-05	17	54	MAOA, PRKAR2A, PRKAR2B, COMT, VAMP3, DRD2, EPB41L2, SLC18A2, GNG2, TH, GNAZ, GNB1, GNAI1, GNAI2, VAMP2, VAMP1, PPP1R1B
Domain	IPR013126	Hsp_70	1.95e-05	8	14	ANKRD45, HYOU1, HSPA13, HSPA12A, HSPA4L, HSPA8, HSPA4, HSPA1B
Drug	CID000027452	Cyprazepam	2.03e-05	7	11	GABRA4, GABRA6, GABRA1, GABRA2, GABRG1, GABRG2, GABRB2
Pathway	ifngpathway	IFN-gamma pathway	2.05e-05	15	44	AKT1, CAMK2D, CAMK2A, PIAS1, CBL, MAPK1, PRKCD, CRKL, CREBBP, PIK3CA, PIK3R1, RAP1B, IFNGR2, JAK2, JAK1
GeneOntologyCellularComponent	GO:0043198	dendritic shaft	2.11e-05	11	30	ACCN2, MAP2, ARHGEF2, CACNA1B, CACNA1C, EXOC4, SLC1A2, GABBR1, FMR1, GSK3B, GRIA3
Domain	IPR003091	K_channel	2.14e-05	11	26	KCNMA1, KCNQ2, KCND2, KCNC4, KCNC3, KCNC1, KCNB1, KCNF1, KCND3, KCNA6, KCNA2
GeneOntologyCellularComponent	GO:0045121	membrane raft	2.17e-05	34	187	ABCA1, ADCYAP1R1, RGMB, MAL, OPRM1, BMPR1A, CACNA1C, CBL, NEDD4, CDH13, EFHD2, PI4K2A, PRKAR2B, PDE2A, RGS16, DCC, DLG1, PTGS2, PTK2B, SLC6A4, SLC8A1, SLC2A1, SLC2A3, SDC4, GABBR1, GJA1, GNAQ, GNAI1, GNAI2, SORBS1, SRC, GSK3B, KCNMA1, JAK2
Interaction	HPRD:02858	Protein phosphatase 2A, regulatory subunit B prime (PR 53)	2.2e-05	5	5	CCNG2, CCNG1, PPP2R4, CSNK2A1, SRC
Interaction	HPRD:00932	IGF-I receptor	2.2e-05	17	49	MDM2, NEDD4, PRKCD, CRKL, CRK, PIK3R1, VAV3, GNAI1, GNAI2, SRC, GRB10, YWHAG, YWHAZ, YWHAB, IGF2, JAK2, JAK1
Drug	CID000005206	sevoflurane	2.26e-05	25	105	TRAPPC9, ADORA1, NBL1, PRKCI, PRKCG, PRKCD, PLCB4, PLCG1, SOD2, GABRA3, GABRA4, GABRA6, GABRA1, GABRA2, FOS, GLRA1, GABRG1, GABRG2, GABRB2, GABRB3, GABRD, KCNA2, DDN, ATP2C1, PLCB1
MousePheno	MP:0002885	abnormal AMPA-mediated synaptic currents	2.45e-05	9	15	ADARB1, KALRN, SLC17A6, NRXN2, NRXN1, DLG4, CACNG2, GRIA4, GRIN1
Interaction	HPRD:01501	Protein kinase C delta	2.57e-05	27	101	ACTB, ADD1, MAPT, MBP, MAPK1, PRKCD, PPP2R5C, AKT3, CREBBP, PDPK1, PIK3CA, RAC1, PTK2B, FSCN1, PDP1, SDC4, GABRA1, GNAZ, GNA13, SRC, YWHAG, YWHAZ, YWHAB, HABP4, IL6ST, ITGB4, PLCB1
Pathway	er_nongenomic_pathway	Plasma membrane estrogen receptor signaling	2.75e-05	14	40	MSN, AKT1, PIK3CA, PIK3R1, GNG2, GNAQ, GNAZ, GNB1, GNAI1, GNAI2, GNA13, SRC, PLCB1, PELP1
GeneOntologyMolecularFunction	GO:0008503	benzodiazepine receptor activity	2.78e-05	5	6	GABRA3, GABRA4, GABRA6, GABRA2, GABRG2
Pathway	il6_7pathway	IL6-mediated signaling events	2.78e-05	15	45	AKT1, MCL1, PIAS1, PRKCD, PIK3CA, MAPK14, PIK3R1, RAC1, MAP2K4, GAB1, FOS, IL6ST, HSP90B1, JAK2, JAK1
Drug	CID000037632	adinazolam	2.84e-05	10	23	MAOA, GABRA4, GABRA6, GABRA1, GABRA2, FMOD, GABRG1, GABRG2, GABRB2, HTR2C
Pathway	h_crebPathway	Transcription factor CREB and its extracellular signals	2.86e-05	10	22	ADCY1, AKT1, MAPK1, PRKAR1B, CREB1, CREBBP, PIK3CA, MAPK14, PIK3R1, RAC1
Pathway	PTDINSPATHWAY	PTDINSPATHWAY	2.86e-05	10	22	GRASP, AP2A1, AKT1, EEA1, PFKP, PFKL, PDPK1, PLCG1, RAC1, GSK3B
GeneOntologyBiologicalProcess	GO:0051248	negative regulation of protein metabolic process	2.88e-05	38	218	ADD1, MAP1B, MAP1A, MAP2, MAPT, APC, SHROOM2, ARRB2, MID1, ARHGEF2, TMOD3, PRKCG, PRKCD, PPP2R4, PIK3R1, RDX, RAB23, PTPN3, EIF4EBP2, SNCA, SGK1, GTPBP4, TIMP2, TIMP3, MGEA5, SPTBN1, GSN, GRIN2A, GRIN2C, EIF2C2, YWHAB, UBE2B, IDE, TPM1, CLASP1, ITGAV, ERRFI1, CLASP2
MousePheno	MP:0005402	abnormal action potential	2.96e-05	24	78	CACNA1G, ANK3, KALRN, ATP2B2, OPRM1, CACNA1A, NEUROD1, CHD7, NEUROD6, SLC6A4, SCN8A, SCN1A, SCN1B, GABBR1, GABRB3, GRIA4, KCNMB4, IL6ST, SBF2, KCNMA1, KCNA2, ITGB4, KCNAB1, SLC12A5
Interaction	HPRD:15926	Glutamate receptor, ionotropic, N-methyl D-aspartate 1	2.97e-05	17	50	MAP2, CANX, CAMK2A, MAP2K2, PRKCG, AKAP9, PLCG1, DLG2, DLG4, DNM1, FUS, CIT, GRIN2A, GRIN1, GRIN2B, DLGAP4, HSPA1A
GeneOntologyBiologicalProcess	GO:0032880	regulation of protein localization	2.98e-05	33	179	ACHE, MBTPS1, RSL1D1, AKT1, MXI1, APC, BMPR1A, APPL1, GOPC, NFKBIA, G3BP2, RABGAP1L, EXOC4, PRKCI, PKIA, PDPK1, PCSK1, PIK3R1, DLG1, DRD2, SGK1, CADM1, SCAMP5, TCF7L2, SORBS1, SRC, GSK3B, YWHAB, JUP, JAK2, GPAM, MYCBP2, UHMK1
Drug	CID000001123	2-aminoethanesulfonic acid	3.03e-05	43	231	MAPT, SLC6A5, SLC17A7, SLC17A6, KRIT1, CLIC4, CHN1, MAPK6, MAPK1, PRKAR2B, CLCN3, CLCN6, PPP2R5E, CSAD, RASGRP1, ARID4B, SLC18A2, SLC6A13, SLC6A4, FGFR1, SOD2, SLC1A6, SLC1A1, SLC1A2, GABRA3, GABRA4, GABRA6, GABRA1, GABRA2, CIT, GLRA1, GABRG2, GABRB2, GABRB3, GABRD, GAD2, GAD1, GRIN2A, GRINA, GRIN2C, GRIN2B, PCSK1N, ZNF146
GeneOntologyMolecularFunction	GO:0019900	kinase binding	3.05e-05	40	235	ACTB, ADAM10, ADD3, MAPT, MEF2A, APC, UBQLN1, APPL1, MAPK9, MAPK1, AKT3, PFKL, PDPK1, PLCB4, PIK3R1, DLG1, ATN1, PTPRK, PTK2B, TOLLIP, SGK1, MAP2K4, SLC2A1, SLC2A3, SDC4, TOP2B, TCF7L2, CAMK2N2, DIXDC1, SORBS1, SRC, RBCK1, GSK3B, YWHAG, TENC1, JUP, JAK2, TAOK1, ERRFI1, KIDINS220
Drug	CID000001206	methamphetamine	3.06e-05	33	160	ACTB, ADORA1, MAOA, MAPT, MAZ, OPRL1, SLC17A7, NPY, CRY1, CREB1, HOMER1, DRD2, TPH2, SLC18A2, SLC6A4, SOD2, SNCA, SLC1A2, GABRA6, FOS, TH, GABRG2, GABRB2, GFAP, SOX10, GRM2, GRIN2A, GRINA, GRIN2C, GRIN2B, HSPB1, PPP1R1B, DDN
GeneOntologyBiologicalProcess	GO:0009187	cyclic nucleotide metabolic process	3.24e-05	32	172	ABCA1, ADCY1, ADCYAP1R1, ADORA1, ATP2B2, NTRK2, OPRL1, OPRM1, PALM, CACNB4, PDE1A, PDE2A, PDE4A, RORA, EDNRB, DRD2, PDE10A, NUDT4, GABBR1, TIMP2, CAP2, CAP1, GNAQ, GNAZ, GNAI1, GNAI2, GUCY1B3, GUCY1A3, GNA13, GRM2, GRM3, GRM4
Drug	CID000003454	ganciclovir	3.24e-05	30	140	AKT1, MAOA, BPHL, CLIC4, CDKN1A, PRKCD, CDK14, COMT, ZNF655, DCK, HOMER1, EIF2S3, SLC15A2, PTK2B, RRM2B, GABBR1, FOS, KRR1, GJA1, GRM2, GRM3, GRM4, DDX17, GRIN2A, GRINA, GRIN2C, GRIN2B, TRPC5, KIF5B, PPP1R1B
Pathway	h_gsk3Pathway	Inactivation of Gsk3 by AKT causes accumulation of b-catenin in Alveolar Macrophages	3.25e-05	12	31	ADAR, AKT1, APC, PDPK1, PIK3CA, PIK3R1, TOLLIP, LEF1, GJA1, GNAI1, GSK3B, IRAK1
MousePheno	MP:0008284	abnormal hippocampus pyramidal cell layer	3.35e-05	19	55	CDK5R1, MAPT, KALRN, ATRX, PAFAH1B1, NCAM1, KLF7, CLCN3, CRKL, CRK, DAB1, DLG4, PTEN, FOXG1, SLC1A2, FUS, TOP2B, HDAC2, NR4A3
Drug	CID023724795	bromazepam	3.56e-05	11	28	TRIM37, MAOA, NOVA2, SRR, GABRA4, GABRA6, GABRA1, GABRA2, GABRG1, GABRG2, GABRB2
Drug	CID000010783	chlormethiazole	3.56e-05	11	28	GABRA4, GABRA6, GABRA1, GABRA2, GABRG1, GABRG2, GABRB2, GRIN2A, GRINA, GRIN2C, GRIN2B
MousePheno	MP:0001475	reduced long term depression	3.62e-05	12	26	CDK5R1, CAMK2A, PINK1, CHRM1, PRKAR1B, CNR1, PPP3R1, PLCB4, GFAP, FOXP2, GRM2, ARHGEF9
GeneOntologyMolecularFunction	GO:0008017	microtubule binding	3.8e-05	20	86	MAP1B, MAPT, APC, ARHGEF2, PAFAH1B1, DST, TMOD3, CEP57, NDE1, APC2, APPBP2, CLASP1, KIF5B, MARK4, TARDBP, KIF1B, CLASP2, HOOK3, VPS41, MTUS2
Drug	D008345	Manganese	3.84e-05	19	71	ACO2, AKT1, NFKBIA, MAPK9, MAPK8, MAPK1, CREB1, MAPK14, PTGS2, SOD2, SOD1, FOS, TH, TF, TFRC, SRC, HSPA8, HIF1A, LPL
MousePheno	MP:0001458	abnormal object recognition memory	3.91e-05	13	30	MAPT, SLC17A7, CAMK2A, CACNB3, JPH3, CREBBP, RCAN2, RCAN1, GABBR1, BAIAP2, GNAI1, GRIA4, GRIN1
Drug	CID000071333	loreclezole	3.91e-05	12	33	FUS, GABRA3, GABRA4, GABRA6, GABRA1, GABRA2, GABRG1, GABRG2, GABRB2, GABRB3, GABRD, KCNMA1
Drug	CID006436102	panfuran	3.92e-05	37	190	SERPINA3, ABCA2, ACHE, TUBB2B, MAP2, MAPT, PGLYRP1, ATP6V0A1, NCL, MAPK9, MAPK8, MAPK1, CNR1, PRKCG, PRKAR2B, PPP2R4, COMT, CX3CR1, DMWD, NPEPPS, KIAA1267, FKTN, SOD1, SNCA, SNCB, CYP46A1, SDC2, GFAP, CELF1, GSK3B, CNBP, ZIC1, IDE, TARDBP, DDN, LCN2, PLCB1
GeneOntologyCellularComponent	GO:0043679	nerve terminal	3.93e-05	16	61	ADORA1, NTRK2, CACNA1B, CHRM1, PCSK1, DRD2, SNCA, SNCB, TH, GABRB3, DIXDC1, GRIA3, GRIA4, GRIK2, GRIK5, KCNMA1
Drug	CID000068736	CGS 19755	3.95e-05	13	38	KITLG, SLC6A5, NTRK3, FOS, GRM2, GRM3, GRIA3, GRIA4, GRIN2A, GRIK5, GRINA, GRIN2C, GRIN2B
GeneOntologyBiologicalProcess	GO:0009612	response to mechanical stimulus	4.08e-05	18	73	MAP1B, MGP, ATP2B2, STRBP, CLCN6, PTCH1, RCAN1, DRD2, PTK2B, SLC12A2, FOS, TIMP3, FOXP2, TXNIP, SRC, GRIN2A, GRIN2B, JUP
GeneOntologyMolecularFunction	GO:0005516	calmodulin binding	4.25e-05	28	144	ADCY1, ADD1, ADD3, MAP2, ATP2B2, ATP2B1, NRGN, EEA1, STRN3, CAMK2D, CALD1, CAMK2A, CACNA1C, CACNA1A, PPP3R1, PPP3CB, PDE1A, CAMKV, RGS16, RGS4, SLC8A1, EWSR1, IQGAP2, VAMP2, SYT1, SPTBN1, GRIN1, ITPKA
GeneOntologyBiologicalProcess	GO:0021549	cerebellum development	4.38e-05	12	37	MTPN, ATP2B2, CACNA1A, NEUROD1, DAB1, RORA, SDF4, FOXP2, DIXDC1, NCOA2, KLHL1, AGTPBP1
Interaction	HPRD:01266	RET	4.42e-05	13	33	CBL, MAPK8, MAPK1, PRKAR2A, CRK, PLCG1, MAPK14, PIK3R1, GAB1, GFRA1, SRC, GRB10, SHC3
Drug	CID000031402	allopregnanolone	4.48e-05	22	90	MBP, MOBP, CACNA2D1, NPY, POMC, SERPINI1, GABRA3, GABRA4, GABRA6, GABRA1, GABRA2, GLRA1, B4GALNT1, GABRG1, GABRG2, GABRB2, GABRB3, GABRD, GRIN2A, GRINA, GRIN2C, GRIN2B
Drug	CID003032285	thiamylal	4.56e-05	15	49	CNTNAP2, PRKCI, MAPK1, PRKCG, PRKCD, DMWD, LRG1, GABRA4, GABRA6, GABRA1, GABRA2, GABRG1, GABRG2, GABRB2, SST
Pathway	MTORPATHWAY	MTORPATHWAY	4.59e-05	10	23	AKT1, EIF3A, PDPK1, PIK3CA, PIK3R1, PTEN, EIF4A1, EIF4B, EIF4G1, RPS6
Pathway	P00041	Metabotropic glutamate receptor group I	4.59e-05	10	23	PRKAR1B, PRKAR1A, HOMER1, NAA15, GRIN2A, GRIN1, GRIK5, GRINA, GRIN2C, GRIN2B
Pathway	kitpathway	Signaling events mediated by Stem cell factor receptor (c-Kit)	4.63e-05	16	52	AKT1, MATK, KITLG, CBL, MAP2K2, MAPK8, CRKL, CREBBP, PDPK1, PIK3CA, PIK3R1, PTEN, GAB1, GSK3B, GRB10, JAK2
GeneOntologyBiologicalProcess	GO:0032869	cellular response to insulin stimulus	4.75e-05	21	94	AKT1, APPL1, PRKCI, PRKCD, HDAC5, AKT3, PDPK1, PIK3R1, ZFP106, EIF4EBP2, SGK1, GAB1, BAIAP2, PHIP, GH1, SORBS1, SRC, GRB10, IGF2, UBE2B, GPAM
GeneOntologyBiologicalProcess	GO:0070647	protein modification by small protein conjugation or removal	4.75e-05	21	94	MDM2, ARRB2, OTUD7B, USP9X, ANAPC1, UBQLN1, PELI1, PINK1, CDC27, MAPK9, OTUB1, FEM1B, DCAF7, SENP2, RLIM, USP12, GSPT1, TTC3, USP22, USP7, WDR48
GeneOntologyBiologicalProcess	GO:0006511	ubiquitin-dependent protein catabolic process	4.81e-05	43	264	AKT1, MDM2, USP8, UBR3, ARIH1, USP9X, ANAPC1, CUL4B, CUL3, NEDD4, CDC27, DERL1, UBR1, USP15, PPP2R5C, CSNK1D, CYLD, TBL1XR1, C10orf46, PSMB3, RAD23A, OS9, ATE1, USP53, RLIM, ARIH2, TBL1X, USP12, UBE2K, FBXO21, UFD1L, UBE2L3, UBE3A, UBE2B, UBE2D3, UBE2G2, TTC3, HSP90B1, USP22, CUL5, KIAA0368, USP7, USP31
GeneOntologyCellularComponent	GO:0005769	early endosome	4.86e-05	26	132	VPS33A, RABEP1, EEA1, SLC17A6, APPL1, TRAK2, PI4K2A, RABGAP1L, ZFYVE20, CLCN3, STEAP2, RAB5C, EPS15, MMGT1, SGK3, NISCH, RAB31, CLVS1, SLC9A6, GJA1, STAM2, TF, PTP4A2, KIAA0368, WDFY1, VPS41
GeneOntologyBiologicalProcess	GO:0007612	learning	4.96e-05	18	74	ACCN2, CACNA1C, NEUROD2, PRKAR2B, COMT, DLG4, DRD2, PTN, SGK1, ATXN1, FOS, TH, FOXP2, GRM4, GRIN2A, GRIN1, GRIN2B, PLCB1
Pathway	P00029	Huntington disease	5e-05	27	117	TUBB2B, AP2A1, AKT1, KALRN, ARL4D, ARF4, RHOG, PACSIN1, MAPK9, AKT3, CREBBP, ARPC1B, DYNC1LI2, DLG4, NCOR2, RAC1, MAP2K4, FOS, VAT1, DYNC1LI1, GRIK2, GRIN2A, GRIN1, GRIK5, GRIN2C, GRIN2B, RHOJ
Drug	DB00371	Meprobamate	5.05e-05	5	6	GABRA3, GABRA4, GABRA6, GABRA1, GABRA2
Drug	C042957	Ro 15-4513	5.05e-05	5	6	GABRA4, GABRA6, GABRA2, GABRG2, GABRB3
Drug	D005680	gamma-Aminobutyric Acid	5.18e-05	9	20	FGF13, GABRA6, GABRA1, GABBR1, GABRG2, GABRB2, GABRB3, GAD2, GAD1
Drug	CID005462126	ACEA 1021	5.22e-05	11	29	SLC6A4, GLRA1, GRM2, GRM3, GRIA3, GRIA4, GRIN2A, GRIK5, GRINA, GRIN2C, GRIN2B
Drug	CID000002789	clobazam	5.22e-05	11	29	CACNA1B, CACNA1C, PTCH1, SLC1A1, GABRA4, GABRA6, GABRA1, GABRA2, GABRG1, GABRG2, GABRB2
MousePheno	MP:0009939	abnormal hippocampus neuron morphology	5.33e-05	21	66	CDK5R1, MAPT, KALRN, ATRX, PAFAH1B1, KLF7, CLCN3, DAB1, DLG4, PTEN, FOXG1, SLC1A2, FUS, CACNG2, GNAQ, HDAC2, HPCA, HIF1A, NR4A3, INPP4A, PLCB1
Interaction	HPRD:02164	CASK	5.44e-05	14	38	APBA1, CNTNAP2, NRXN2, NRXN1, DLG1, DLG4, EPS8, SDC4, SDC2, CADM1, TBR1, GRIK2, GRIN2A, RPH3A
Interaction	HPRD:01443	Potassium voltage gated channel subfamily A member 2	5.46e-05	8	14	KCNAB2, CNTNAP2, DLG1, DLG4, CTTN, PTK2B, KCNA2, KCNAB1
Pathway	SMOOTH_MUSCLE_CONTRACTION	SMOOTH_MUSCLE_CONTRACTION	5.48e-05	32	150	ADCY1, SAR1A, ARRB2, CAMK2D, CAMK2A, CACNB3, RGS5, PRKAR1B, PRKAR1A, PKIA, PRKCD, PRKAR2A, PRKAR2B, PRKACB, ATF2, PLCG1, RGS16, RGS4, GNG12, GNG13, LPAR1, SLC8A1, GNG2, FOS, GJA1, GNAQ, GNB1, RAMP3, GUCY1A3, GRK6, YWHAB, IGFBP4
MousePheno	MP:0002578	impaired ability to fire action potentials	5.56e-05	8	13	CACNA1G, ANK3, OPRM1, NEUROD1, NEUROD6, GRIA4, KCNMA1, KCNA2
GeneOntologyBiologicalProcess	GO:0050808	synapse organization	5.61e-05	21	95	ACHE, MAP1B, ANK3, ATP2B2, CACNB4, CACNA1A, CACNB2, DNM3, ERC2, SPOCK2, NCAN, CACNA2D2, NRXN2, NRXN1, DRD2, CADM1, CACNG2, GPHN, GRIN1, NLGN1, NLGN2
Drug	D003976	Diazinon	5.73e-05	40	215	ACHE, ADCY1, NTRK3, NTRK2, CHRM1, PRKCI, PRKAR2A, CREB1, PDE1A, COMT, GNG12, DRD2, SLC18A2, SLC6A4, FGFR1, FGF14, SOD2, SOD1, PDE10A, SLC1A2, TH, GNAQ, GNAZ, GNAI2, GMFB, GFAP, GNA13, MYEF2, GRM2, GRM3, GRM4, GRIA4, GRIK2, GRIN2A, GRIK5, GRINA, GRIN2C, GRIN2B, HTR2C, DKK3
Interaction	HPRD:03382	Protein kinase, cAMP dependent, catalytic, alpha	5.74e-05	34	146	ABCA1, ACCN2, ACLY, ADD1, MAP2, MBP, APC, ATP2B1, CACNA1C, CACNB2, SLC4A4, PRKAR1A, PKIA, PDPK1, RAP1B, SLC9A3R2, DNAJC5, FOS, TH, GJB1, GP1BB, CACNG2, GMFB, GFAP, STK11, GNA13, SPTBN1, SRC, GSK3B, GRIA4, NR3C1, CUL5, ITPKA, PPP1R1B
Drug	CID000001066	quinolinic acid	5.75e-05	35	179	ACHE, MTPN, PACSIN1, JPH3, NPY, CNTFR, CNR1, SLC23A2, CREB1, ATN1, DRD2, SOD1, ARPP21, FOS, TH, ZFP91, GAD2, GAD1, GFRA1, GFAP, HCRT, GRM2, GRM3, GRM4, SST, GRIN2A, GRIK5, GRINA, GRIN2C, GRIN2B, IL6ST, TTR, TPR, ZDHHC17, PPP1R1B
GeneOntologyCellularComponent	GO:0032589	neuron projection membrane	5.76e-05	8	18	ADORA1, OPRM1, CNTNAP2, SLC1A2, GABBR1, KCNB1, DDN, SLC12A5
Drug	CID000005118	raclopride	5.76e-05	20	79	ASS1, CHRM1, POMC, HDAC5, DRD2, FOS, TH, GAD2, GAD1, HDAC2, GSN, GRIN2A, GRIN1, GRINA, GRIN2C, GRIN2B, IDE, HTR2C, KCNJ9, PPP1R1B
Drug	DB00836	Loperamide	5.81e-05	6	9	OPRM1, CACNA1A, POMC, GRIN2A, GRIN2C, GRIN2B
Drug	D003010	Clorgyline	5.81e-05	32	158	CPNE9, MAOA, APC, SFRS2IP, ATRX, DST, TBC1D15, CACNB2, RGS5, SLK, RB1CC1, CPD, MBNL2, AKAP9, PIK3C2A, STEAP2, RICTOR, GCC2, CHD9, TMEM106B, RAPGEF4, PHIP, STAG2, UBE2W, ZNF638, CHIC1, ZNF292, PCMTD1, NUDCD1, PHF3, SHOC2, ZNF644
Interaction	109160	Affinity Capture-Western; Reconstituted Complex	5.82e-05	6	8	DLG1, DLG2, DLG4, PTK2B, GRIN2A, GRIN1
Interaction	HPRD:09108	Kinesin family member 5A	5.82e-05	6	8	ITSN1, TP53BP2, NCOA2, KIF5A, KIF5B, KIF5C
Interaction	HPRD:02429	5-hydroxytryptamine receptor 2C	5.82e-05	6	8	APBA1, ARRB2, LIN7C, DLG4, GNAQ, HTR2C
Pathway	NFATPATHWAY	NFATPATHWAY	6.01e-05	16	53	AKT1, MEF2C, MAPK8, MAPK1, PRKAR1B, PRKAR1A, PRKAR2A, PRKAR2B, PRKACB, PPP3CB, CREBBP, PIK3CA, MAPK14, PIK3R1, SYT1, GSK3B
GeneOntologyBiologicalProcess	GO:0048193	Golgi vesicle transport	6.04e-05	27	139	NAPG, AP2A1, SAR1A, ARCN1, SH3D19, GOPC, DNAJC6, RAB6B, EXOC4, PRKCI, ATL2, ARFGAP1, STEAP2, SCAMP1, GOSR1, GOSR2, RAB2A, PUM1, SH3GL2, RAB31, SEC24B, VAMP7, VAMP2, HSPA8, COPG2, TXNDC5, LMAN1
GeneOntologyCellularComponent	GO:0030427	site of polarized growth	6.04e-05	19	83	LRRTM1, CDK5R1, MAP1B, MAPT, APC, NTRK2, NGEF, PAFAH1B1, ERC2, TMOD2, EXOC4, PRKCI, DCC, PTK2B, SNCA, TIMP2, GSK3B, GRIN1, RUFY3
GeneOntologyCellularComponent	GO:0005952	cAMP-dependent protein kinase complex	6.13e-05	6	10	PRKAR1B, PRKAR1A, PRKAR2A, PRKAR2B, PRKACB, RAPGEF4
Drug	CID000005092	rolipram	6.35e-05	45	253	ADCY1, ADORA1, AKT1, MBP, KRIT1, CHRM1, PRKAR1A, PKIA, PRKAR2A, PRKAR2B, PRKACB, PPP2R4, CREB1, CREBBP, PDE1A, PDE2A, PDE4A, AKAP9, PLCB4, CRYM, CSNK1D, RAP1B, AKAP6, PTGS2, DRD2, FKBP5, PDE10A, FABP7, CIT, FOS, TOP2B, GUCY1B3, GRM2, GRM3, GRM4, GRIA3, GRIA4, GRIK2, GRIN2A, GRIK5, GRINA, GRIN2C, GRIN2B, VIP, THOC3
Pathway	CFTRPATHWAY	CFTRPATHWAY	6.42e-05	7	12	ADCY1, PRKAR1B, PRKAR1A, PRKAR2A, PRKAR2B, PRKACB, SLC9A3R1
GeneOntologyMolecularFunction	GO:0008139	nuclear localization sequence binding	6.68e-05	6	10	TNPO2, NFKBIA, KPNA3, KPNA1, KPNB1, TNPO1
GeneOntologyBiologicalProcess	GO:0006605	protein targeting	6.73e-05	46	293	MBTPS1, AKT1, MXI1, ANK3, TNPO2, BMPR1A, CACNB1, SEC61A1, NEDD4, NFKBIA, TRAK2, G3BP2, EXOC4, PRKCI, TOMM70A, MAPK1, PKIA, PPP1R3C, PEX6, AKAP6, CEP57, SEC62, TRNT1, TCF7L2, MGEA5, TXNIP, SPTBN1, SSR1, GSK3B, IPO8, HSPA9, NLGN1, YWHAG, YWHAZ, YWHAB, TRPS1, TPR, KPNA3, KPNA1, KPNB1, JUP, JAK2, AP3M1, UHMK1, ARL6IP1, TNPO1
Drug	CID023724816	brotizolam	6.75e-05	10	25	CACNA1B, CACNA1C, CACNA1A, GABRA4, GABRA6, GABRA1, GABRA2, GABRG1, GABRG2, GABRB2
GeneOntologyBiologicalProcess	GO:0006576	cellular biogenic amine metabolic process	6.8e-05	25	125	ACHE, MAOA, AMD1, MTPN, ATP2B2, PAFAH1B1, CHPT1, CACNA1A, CHKA, MED1, OAZ3, ETNK1, ATF2, COMT, CRYM, DIO2, DRD2, TPH2, SNCA, SNCB, TH, SULT1A1, GRIN2A, TTR, HTR2C
Drug	C005460	uranyl acetate	6.83e-05	41	224	ACTB, ADAR, RNGTT, APC, CANX, CAMK2D, NAP1L1, APPL1, TRAK2, PI4K2A, PDCD6IP, PDE1A, YTHDF3, PIK3R1, RDX, SSX2IP, BAALC, SCAMP1, DTNA, RAC1, PUM1, METAP2, EPS15, IQGAP2, SLC2A3, SEC24B, DIXDC1, GSPT1, HSPA8, HSPA1A, YWHAB, HMGB1, ID2, KPNA3, C5orf33, HBP1, KIF1B, CSDE1, EVI5, LAMP2, RAB11FIP4
Pathway	erbb2erbb3pathway	ErbB2/ErbB3 signaling events	6.89e-05	14	43	AKT1, USP8, MAP2K2, MAPK9, MAPK8, MAPK1, PPP3CB, PIK3CA, PIK3R1, RNF41, RAC1, FOS, SRC, JAK2
Domain	IPR006028	GABAA_rcpt	6.92e-05	8	16	GABRA4, GABRA6, GABRA1, GABRA2, GABRG1, GABRB2, GABRB3, GABRD
Pathway	s1p_s1p2_pathway	S1P2 pathway	7.13e-05	10	24	MAPK8, MAPK1, MAPK14, RAC1, FOS, GNAQ, GNAZ, GNAI1, GNAI2, GNA13
Drug	CID000005304	strychnine	7.28e-05	35	181	ACCN2, TRIM37, APOD, CHRNA6, SLC6A5, MARCH7, NOVA1, CHRM1, PFKL, SCN3B, DCN, PTCH1, SCN1B, ABCB8, GABRA4, GABRA6, GABRA1, GABRA2, GLRA1, TOP2B, GABRG1, GABRG2, GABRB2, GPHN, GFAP, GRM2, GRM3, GRIA3, GRIA4, GRIN2A, GRIK5, GRINA, GRIN2C, GRIN2B, SLC12A5
Interaction	HPRD:08968	Eps15	7.29e-05	12	30	AP2A1, REPS2, UBQLN1, EPN1, NEDD4, CRK, DNM1, ITSN1, EPS15, STAM2, EPN2, SPG20
Drug	CID000003821	ketamine	7.32e-05	46	262	ACCN2, AKT1, CHRNA6, MGP, OPRL1, OPRM1, CACNA2D1, PNN, CNR1, CPD, COMT, SCN3B, DLG4, HOMER1, SRR, SLC6A4, F3, SCN1B, ABCB8, GABRA3, GABRA4, GABRA6, GABRA1, GABRA2, FOS, RPL29, GABRG1, GABRG2, GABRB2, GABRB3, GABRD, GAD1, GRM2, GRM3, GRM4, GRIA3, GRIA4, GRIK2, GRIN2A, GRIK5, GRINA, GRIN2C, GRIN2B, ID2, IDS, KCNB1
GeneOntologyMolecularFunction	GO:0008509	anion transmembrane transporter activity	7.35e-05	29	156	ABCA1, OCA2, SLC17A7, SLC4A4, CLIC4, CLCN3, CLCN6, ANO6, SLC22A8, ANO3, SLC12A2, SLC4A3, SLC1A6, SLC1A1, SLC1A2, GABRA3, GABRA4, GABRA6, GABRA1, GABRA2, GLRA1, TTYH3, GABRG1, GABRG2, GABRB2, GABRB3, GABRD, TTYH2, SLC12A5
Drug	D015742	Propofol	7.52e-05	11	30	CHRM1, MAP2K2, MAPK1, SLC1A1, GABRA4, GABRA1, FOS, GABRG2, GABRB2, GRIN2A, HSPB1
Pathway	P00021	FGF signaling	7.91e-05	24	101	AKT1, ARAF, MAP2K2, MAPK9, PRKCI, MAPK8, MAPK1, PRKCG, PRKCD, PPP2R5C, PPP2R5E, AKT3, PLCG1, PIK3C2A, PIK3CA, MAPK14, RAC1, FGFR1, FGFR3, FGF13, FGF14, MAP2K4, YWHAB, SHC3
Interaction	HPRD:00698	N-methyl D-aspartate receptor subunit 2A	7.94e-05	11	26	CAMK2A, ARHGAP32, PLCG1, DLGAP1, DLG1, DLG2, DLG4, PTK2B, SRC, GRIN2A, GRIN1
Pathway	SHHPATHWAY	SHHPATHWAY	8.03e-05	8	16	PRKAR1B, PRKAR1A, PRKAR2A, PRKAR2B, PRKACB, PTCH1, DYRK1A, GSK3B
Pathway	G_PROTEIN_SIGNALING	G_PROTEIN_SIGNALING	8.15e-05	23	95	ADCY1, SAR1A, ARHGEF1, PRKCI, PRKAR1B, PRKAR1A, PRKCG, PRKCD, PRKAR2A, PRKAR2B, PRKACB, PDE1A, PDE4A, AKAP9, GNG12, PALM2, GNG13, AKAP6, GNAQ, GNAZ, GNB1, GNAI2, GNA13
MousePheno	MP:0002826	tonic seizures	8.35e-05	11	24	GJC2, DGKE, CACNB4, CHN1, CACNA2D2, QKI, SCN1A, GJB1, ZNF24, HTR2C, KCNA2
Drug	CID000003784	isradipine	8.41e-05	23	100	ACCN2, CACNA1G, CACNB4, CACNB3, CACNA1B, CACNA1C, CACNA1A, CACNB1, CACNB2, CACNA2D1, SCN3B, CACNA2D2, DRD2, SCN1B, ABCB8, CACNG2, CACNG3, GAD2, GSK3B, HSPA4, KCNMA1, NCEH1, CACNG4
Drug	CID000004597	ONPF	8.67e-05	19	75	AP2A1, HIP1R, REPS2, OPA1, EEA1, EPN1, DNM3, NPY, ZFYVE20, DNM1L, DNM1, SCAMP1, EPS15, TF, TFRC, SYT1, EPN2, SYNE1, SYT2
GeneOntologyBiologicalProcess	GO:0040014	regulation of multicellular organism growth	8.68e-05	18	77	AKT1, SGPL1, ACVR1C, ATRN, CREB1, CHD7, PIK3CA, CACNA2D2, DLG1, PTCH1, DRD2, TNKS2, FGFR2, SOD1, GH1, CELF1, PCSK1N, GPAM
MousePheno	MP:0000788	abnormal cerebral cortex morphology	8.69e-05	50	227	ADCY1, CDK5R2, CDK5R1, MAP1B, MAOA, MAP2, KALRN, DCLK1, ARHGAP5, ATP2B2, ATRX, NTRK2, PAFAH1B1, ATRN, NFIX, PINK1, KLF7, CHN1, MAPK1, CNR1, CLCN3, CRKL, CRK, PDHA1, DAB1, GPR56, DYRK1A, NEUROD6, EPHA4, NCOR2, RAC1, SLC6A4, SOD2, FOXG1, CADM1, LEF1, GNB1, GM2A, TOP2B, GAD1, NDE1, GRIN1, GRIN2B, HIF1A, SPEN, BHLHE22, UBE3A, KIF2A, SUZ12, MYCBP2
Drug	C107676	deguelin	8.72e-05	14	46	AKT1, XIAP, BCL2L1, NFKBIA, CDKN1A, MAP2K2, PIK3CA, PTGS2, RPS6, FOS, SRC, GSK3B, HIF1A, PPP1R1B
Domain	IPR001806	Ras_trnsfrmng	8.82e-05	29	136	ARL5A, SAR1A, ARF3, ARF4, RHOG, RND3, DIRAS1, RAB6B, C9orf86, RAP1B, RAB23, RAB27B, RAC1, RAB5C, AGAP1, AGAP3, RHOF, DIRAS2, RAB39B, GTPBP4, RAB31, DYNC1LI1, ARL8B, RAB3C, RAB18, RAB2B, RAB1B, RASD2, RHOJ
MousePheno	MP:0001970	abnormal pain threshold	9e-05	38	158	ADCY1, ADORA1, GRASP, CDK5R1, ARRB2, KIF1A, OPRL1, OPRM1, SLC17A6, CACNA1B, CACNA1A, NBL1, PRKAR1B, CNR1, PRKCG, CLCN6, DLG4, EDNRB, PTGS2, PTGDS, NPEPPS, FXR2, TPH2, S100A10, GABRA4, GABBR1, FMR1, TH, GNAQ, GNAZ, GRIA3, GRIA4, SSTR4, GRIK5, KCND2, KCNA6, KCNIP3, LMO7
GeneOntologyMolecularFunction	GO:0008331	high voltage-gated calcium channel activity	9.01e-05	5	7	CACNB4, CACNB3, CACNA1A, CACNB1, CACNB2
Drug	CID000003008	dextromethorphan	9.09e-05	24	107	MAOA, PCP2, OCA2, OPRL1, OPRM1, CACNA2D1, SCN3B, DRD2, RAB2A, SLC6A4, CYP46A1, SCN1B, ABCB8, CIT, FOS, STAM2, GRM2, GRM3, GRIA4, GRIN2A, GRIK5, GRINA, GRIN2C, GRIN2B
Drug	D018682	GABA Agents	9.34e-05	4	4	GABRA6, GABRA1, GABRG2, GABRB3
GeneOntologyBiologicalProcess	GO:0006897	endocytosis	9.37e-05	46	297	ABCA1, ACHE, ACTN4, SIRPA, ADORA1, AP2A1, HIP1R, ARRB2, RABEP1, EEA1, PACSIN1, EPN1, CBL, DNM3, NEDD4, CDH13, ELMO1, STAB2, STEAP2, DLG4, DNM1, SCAMP1, PTEN, DRD2, CTTN, RIN1, RAC1, RAB5C, SNCA, ITSN1, SH3GL2, ICAM5, CAP1, GH1, SCAMP5, RAMP3, TFRC, STXBP1, VAMP7, EPN2, RAB18, UBE3A, SYNE1, ITGAV, RAB7A, FNBP1
Pathway	AT1RPATHWAY	AT1RPATHWAY	9.4e-05	12	34	MEF2A, MEF2C, MAP2K2, MAPK8, MAPK1, ATF2, RAC1, PTK2B, MAP2K4, GNAQ, SYT1, SRC
Pathway	PW:0000232	phosphatidylinositol 3-kinase-Akt signaling	9.4e-05	12	34	AKT1, AKT3, PDPK1, PLCB4, PLCG1, PIK3CA, PIK3R1, DGKG, DGKB, PTEN, ITPKA, PLCB1
Drug	D002118	Calcium	9.48e-05	48	280	ACTB, CACNA1G, AKT1, ARRB2, MGP, ATP2B1, PAFAH1B1, CAMK2D, CACNA1B, CACNA1C, CACNA1A, DDR1, CACNA2D1, NEDD4, NFKBIA, CHRM1, MAP2K2, CNR1, COL1A2, PRKCD, NR1D2, CP, CREB1, PIK3CA, MAPK14, RGS4, HOMER1, EDN3, PTGS2, SELT, DRD2, PTK2B, SLC8A1, FGFR1, SOD1, SNCA, S100A8, GABBR1, LYPLA1, CACNG2, GNAI2, SYT1, HPCA, YWHAZ, IGF2, TRPC5, TAOK1, CACNG4
Pathway	BIOPEPTIDESPATHWAY	BIOPEPTIDESPATHWAY	9.5e-05	13	39	MAPT, CAMK2D, CAMK2A, MAP2K2, MAPK8, MAPK1, PLCG1, MAPK14, PTK2B, GNB1, GNAI1, SYT1, JAK2
Drug	CID000002712	chlordiazepoxide	9.66e-05	25	114	CACNA1G, ARF4, BCAT1, SV2B, ARPC3, POLR3E, RAC1, EPS8, AHCYL1, GABRA3, GABRA4, GABRA6, GABRA1, GABRA2, BAIAP2, GABRG1, GABRG2, GABRB2, GABRB3, GABRD, GAD1, TFRC, CELF1, IGF2, HTR2C
GeneOntologyBiologicalProcess	GO:0010035	response to inorganic substance	9.84e-05	36	214	CACNA1G, MAP1B, MGP, ASS1, BCL2L1, NEDD4, SLC25A12, CDKN1A, MAPK9, MAPK8, CP, PDGFA, PDGFRA, PCSK1, PTCH1, PTGS2, PTEN, PTPRN, PTK2B, SOD2, SOD1, SNCA, FNTB, LEF1, TFRC, TXNIP, SYT1, GSN, GRIA3, NR3C1, KCNMB4, TXNRD1, ID2, KCNMA1, KCNIP2, LCN2
GeneFamily	RAB	RAB, member RAS oncogene family	9.9e-05	11	60	RAB6B, RAB23, RAB2A, RAB27B, RAB5C, RAB39B, RAB31, RAB3C, RAB18, RAB1B, RAB7A
Pathway	hsa05215	Prostate cancer	9.94e-05	22	90	AKT1, MDM2, ARAF, NFKBIA, CDKN1A, MAP2K2, MAPK1, AKT3, CREB1, CREBBP, PDGFA, PDGFRA, PDPK1, PIK3CA, PIK3R1, PTEN, FGFR1, FGFR2, LEF1, TCF7L2, GSK3B, HSP90B1
GeneOntologyBiologicalProcess	GO:0051493	regulation of cytoskeleton organization	9.96e-05	31	174	ADD1, MAP1B, MAP1A, MAP2, MAPT, APC, SHROOM2, MID1, ARHGEF2, DST, TMOD3, MAPK8, PDGFA, ARPC3, ARPC1B, RDX, DLG1, RICTOR, RAC1, SGK1, SDC4, CIT, DYNC1LI1, TACC1, SPTBN1, GSN, NEBL, TPM1, CLASP1, MYCBP2, CLASP2
Domain	PS50002	SH3	0.000100181	34	171	MPP2, MATK, NGEF, PACSIN1, DST, CACNB4, CACNB3, CACNB1, CACNB2, RUSC2, CRKL, CRK, PLCG1, PIK3R1, MPP5, DLG1, DLG2, DLG4, CTTN, ITSN1, SH3GL2, EPS8, RUSC1, BAIAP2, VAV3, AHI1, STAM2, ARHGAP12, SORBS1, SRC, ARHGAP33, FNBP1, ARHGEF9, LASP1
Drug	CID000003925	QX-314	0.000101215	20	82	CHRM1, SCN3B, SLC1A1, SCN1B, ABCB8, GABRA4, GABRA6, GABRA1, GABRA2, GABRG1, GABRG2, GABRB2, GRM3, GRIA3, GRIA4, GRIN2A, GRIK5, GRINA, GRIN2C, GRIN2B
GeneOntologyBiologicalProcess	GO:0000245	spliceosome assembly	0.000103176	12	40	SFRS2IP, CELF4, SFRS1, SFRS13A, CELF2, CELF1, SLU7, SRPK2, SF1, PRPF19, PTBP2, SF3A2
Interaction	111105	Affinity Capture-Western	0.000104962	8	15	MAPT, PAFAH1B2, CAMK2A, DLG4, GRIN2B, HSPA8, HSPA1A, HSPA4
GeneOntologyBiologicalProcess	GO:0050773	regulation of dendrite development	0.000105878	10	29	ACHE, KALRN, NTRK2, DBN1, SGK1, CIT, RAPGEF4, GSK3B, GRIN1, SYNE1
Drug	D003300	Copper	0.000106171	24	108	ACHE, MT3, AKT1, APBA1, ATOX1, CHRM1, MAPK8, MAPK1, CP, CREB1, ATF2, STEAP2, SOD2, SOD1, SNCA, FOS, GLRA1, SYT1, SRC, HSPA8, HSPA1A, HSPA1B, HIF1A, TTR
Drug	D019287	Zinc Sulfate	0.00010731	40	221	AKT1, MAL, BAZ1B, BCL2L1, KLF9, SLC39A10, CACNA1C, NFKBIA, JPH3, PPM1B, CDKN1A, MAPK8, MAPK1, PKIA, NR1D2, PPP1R3C, DTX3, PFKL, PDK4, PLCB4, SESN3, EDNRB, EPHA7, PTPRD, SCN1A, PDP1, DDIT4, TIMP3, GJA1, SNRK, SULT1A1, MYEF2, SRC, TROVE2, HSPA8, HSPA1A, CNBP, IL6ST, MTUS1, ATP2C1
Domain	PS00349	CTF_NFI_1	0.000107365	4	4	NFIC, NFIB, NFIA, NFIX
Domain	IPR012198	PK_regulatory	0.000107365	4	4	PRKAR1B, PRKAR1A, PRKAR2A, PRKAR2B
Pathway	P05734	Synaptic vesicle trafficking	0.000107898	10	25	STX1B, SYT7, RIMS2, STXBP1, STX1A, VAMP2, VAMP1, SYT1, SYT2, SYT11
GeneOntologyBiologicalProcess	GO:0000375	RNA splicing, via transesterification reactions	0.000111105	31	175	SFRS2IP, CELF4, NOVA1, POLR2A, CPSF3, CSTF2, HNRNPR, WDR77, DHX9, PAPOLA, TRA2B, SFRS1, SFRS2, SFRS13A, FUS, NUDT21, BCAS2, RBM25, CELF2, CELF1, SLU7, SRPK2, HNRNPA3, SF1, HNRNPL, HNRNPF, PRPF19, SNW1, PTBP2, SF3A2, SF3B1
GeneOntologyCellularComponent	GO:0000118	histone deacetylase complex	0.000113943	13	47	APPL1, HDAC5, HR, CSNK2A1, TBL1XR1, RBBP4, NCOR2, MORF4L1, HDAC2, TBL1X, SATB2, CBX5, ING2
GeneOntologyCellularComponent	GO:0017053	transcriptional repressor complex	0.000113943	13	47	APPL1, CSNK2A1, TBL1XR1, RBBP4, PRDM16, NCOR2, SMARCE1, RLIM, HDAC2, TBL1X, YWHAB, CBX5, ZBTB16
GeneOntologyCellularComponent	GO:0016607	nuclear speck	0.000116689	23	116	MEF2C, PIAS1, CDC5L, SFRS18, HIPK1, PNN, DDX46, DDX3X, DYRK1A, RBM39, SON, SFRS1, SFRS2, SFRS13A, RBM25, SLU7, HSPA1B, PRPF19, ZNF638, SF3B1, SRRM2, FYTTD1, ZBTB16
MousePheno	MP:0004769	abnormal synaptic vesicle morphology	0.000118916	10	21	KIF1A, SLC17A7, SLC17A6, CAMK2A, CLCN3, DNM1, SLC18A2, FGFR2, CACNG2, KIF1B
Pathway	MRNA_PROCESSING_REACTOME	MRNA_PROCESSING_REACTOME	0.000124485	27	123	SFRS12, RNGTT, CELF4, SPOP, POLR2A, CPSF3, CSTF2, HNRNPR, DHX9, RBM39, PAPOLA, TRA2B, SFRS2, SFRS13A, FUS, CCNY, NUDT21, CELF2, CELF1, SRPK2, XRN2, HNRNPA3, HNRNPL, PTBP2, SF3A2, SF3B1, CLK4
Pathway	PPARAPATHWAY	PPARAPATHWAY	0.000124927	16	56	NFKBIA, MED1, MAPK1, PRKAR1B, PRKAR1A, PRKAR2A, PRKAR2B, PRKACB, CREBBP, PDGFA, PIK3CA, PIK3R1, PTGS2, NCOR2, HSPA1A, LPL
GeneOntologyBiologicalProcess	GO:0043491	protein kinase B signaling cascade	0.000125376	11	35	AKT1, P2RY12, PIK3CA, RICTOR, PTEN, DRD2, ITSN1, F3, TCF7L2, STK11, IGF2
GeneFamily	IPO	Importins	0.000125536	6	18	TNPO2, IPO8, KPNA3, KPNA1, KPNB1, TNPO1
Pathway	CARM1PATHWAY	CARM1PATHWAY	0.00012661	7	13	PRKAR1B, PRKAR1A, PRKAR2A, PRKAR2B, PRKACB, CREB1, CREBBP
GeneOntologyMolecularFunction	GO:0005070	SH3/SH2 adaptor activity	0.000127739	14	53	CHN1, CRKL, CRK, SH3BGR, SH3BGRL, EPS8, RUSC1, GAB1, VAV3, TP53BP2, SORBS1, SRC, GRB10, LASP1
Drug	CID000065959	iomazenil	0.000127824	9	22	RTN4, GABRA4, GABRA6, GABRA1, GABRA2, GABRG1, GABRG2, GABRB2, GABRB3
Drug	C033457	phenobarbital quinidine	0.000127824	9	22	GABRA3, GABRA4, GABRA6, GABRA1, GABBR1, GABRB3, GABRD, GAD2, GAD1
Drug	CID000003307	etizolam	0.000127824	9	22	PIK3C2A, GABRA4, GABRA6, GABRA1, GABRA2, FMOD, GABRG1, GABRG2, GABRB2
Interaction	HPRD:00279	Casein kinase II, alpha 2	0.000128217	20	71	AQP4, ARRB2, NCL, PPP1R2, ATF2, CREBBP, MAPK14, PTEN, SLC18A2, SNCA, HSPH1, FOS, UBE2R2, TCF7L2, STX1A, GTF2A1, HDAC2, HMGA1, HSP90B1, PPP1R1B
Drug	CID005361912	rifabutin	0.000128476	35	186	AKT1, ARAF, PACSIN1, CACNA1B, CACNA1A, NFKBIA, JPH3, RFK, CNR1, RSF1, ATN1, DRD2, RHOF, FOXG1, SNCA, HSPH1, F3, TH, GFAP, HCRT, HSPA13, GRIN2A, GRIN2B, HSPA12A, HSPA4L, HSPB1, HSPA8, HSPA9, HSPA4, HIF1A, EMB, HSP90B1, TPR, ZDHHC17, PPP1R1B
Drug	CID000036339	etomidate	0.000130589	18	71	TRAPPC9, NBL1, POMC, SLC1A1, IL1RAPL1, GABRA3, GABRA4, GABRA6, GABRA1, GABRA2, GLRA1, GABRG1, GABRG2, GABRB2, GABRB3, GABRD, IL1RAP, KCNQ2
Drug	CID000003281	ethchlorvynol	0.000133038	6	10	PTGS2, GABRA4, GABRA6, GABRA1, GABRA2, CYGB
GeneOntologyBiologicalProcess	GO:0050905	neuromuscular process	0.000133707	16	66	APLP2, ATP2B2, PAFAH1B1, CACNA1A, DRD2, FABP7, SCN1A, GLRA1, GM2A, GRIN2A, GRIN1, GRIN2C, GRIN2B, KCNMA1, NR4A3, AGTPBP1
MousePheno	MP:0002204	abnormal neurotransmitter level	0.000135085	20	65	SLC17A7, CACNA1A, ERC2, MAPK9, CACNA2D2, RAP1B, VAMP3, NRXN2, NRXN1, SLC18A2, CPLX2, GAD2, GAD1, GFRA1, STXBP1, VAMP2, SYT1, RAB3C, LPHN1, SYT2
GeneOntologyCellularComponent	GO:0048770	pigment granule	0.000135649	20	95	ATP6V0A1, OCA2, CANX, NAP1L1, PDCD6IP, RAB2A, RAC1, RAB5C, DNAJC5, SLC2A1, TH, TFRC, SYPL1, GNA13, TMEM33, HSPA8, YWHAZ, YWHAB, HSP90B1, RAB7A
MousePheno	MP:0003107	abnormal response to novelty	0.000136425	31	122	MAP1B, MAOA, OPA1, OPRL1, CANX, JPH3, NPY, CNR1, CLCN3, SERPINI1, RORB, QKI, PTEN, DRD2, TPH2, SLC18A2, SLC6A4, EHMT2, PDE10A, CPLX2, ATXN1, FMR1, FOXP2, GSK3B, GRIA4, HTR2C, KCNC3, KCNC1, NTAN1, LSAMP, ARHGEF9
Pathway	SA_PTEN_PATHWAY	SA_PTEN_PATHWAY	0.000137949	8	17	AKT1, IPCEF1, MAPK1, AKT3, PIK3CA, PTEN, PTK2B, BPNT1
Pathway	ERK5PATHWAY	ERK5PATHWAY	0.000137949	8	17	AKT1, MEF2A, MEF2C, MAPK1, CREB1, PLCG1, PIK3CA, PIK3R1
Pathway	nfkappabatypicalpathway	Atypical NF-kappaB pathway	0.000137949	8	17	ARRB2, NFKBIA, PIK3CA, MAPK14, PIK3R1, CSNK2A1, SRC, FBXW11
Interaction	HPRD:10040	Veli 2	0.000138849	7	12	ABCA1, APBA1, DLG4, GNG13, BAIAP2, GRIK2, GRIN2B
Interaction	109072	Affinity Capture-MS	0.000138849	7	12	APC, APLP2, ARAF, RND3, CSNK2A1, DYRK1A, MARK2
GeneOntologyBiologicalProcess	GO:0018193	peptidyl-amino acid modification	0.00014221	42	268	PRMT8, AKT1, MAP2, EIF5A2, KITLG, P4HA1, DDR1, PINK1, STT3B, SPOCK2, MAPK8, MAPK1, PRKCD, NLK, AKT3, CREBBP, PDK4, PDGFA, PDGFRA, PDPK1, HIPK3, DCN, RICTOR, DYRK1A, PTK2B, METAP2, FGFR3, SGK1, NAA15, SBK1, GH1, GALNT1, KRTCAP2, SRC, GSK3B, IL6ST, TTBK2, JAK2, JAK1, UHMK1, METAP1, CLK4
Drug	D019256	Cadmium Chloride	0.000143407	47	277	ACHE, MT3, AKT1, MATK, MAFG, APBA1, MCL1, MGP, ATP2B1, CHPT1, CACNA1B, NFKBIA, NFIX, CDKN1A, MAPK9, MAPK8, MAPK1, PDGFA, PDGFRA, PCYT1A, MAPK14, PTGS2, PTMS, OS9, FGFR1, SOD2, SOD1, SGK1, SFRS2, SLC2A1, SLC2A3, FOS, GLRX, GH1, HDGF, GSN, HSPB1, HSPA8, HSPA1A, HSPA4, TXNRD1, ID2, HSP90B1, TPM1, ITGB4, GPAM, LPL
MousePheno	MP:0002918	abnormal paired-pulse facilitation	0.000143546	17	51	APBA1, CAMK2A, CACNA1A, CHRM1, MAPK9, CNR1, RAP1B, DLG4, PTN, PTPRD, ATXN1, FOXP2, RAB3C, GRM4, GRIK2, GRIK5, SYT2
Drug	C105686	SU 5402	0.000145283	14	48	CDK5R2, AKT1, ARL5A, BMP1, MAPK1, MAPK14, FGFR1, FGFR3, FGFR2, FGF13, FOS, LEF1, HIF1A, ERRFI1
Pathway	cdc42_pathway	CDC42 signaling events	0.000145893	19	74	APC, CBL, NFKBIA, MAPK9, MAPK8, MAPK1, ATF2, ARPC3, ARPC1B, PIK3CA, MAPK14, PIK3R1, DLG1, RAC1, EPS8, MAP2K4, BAIAP2, SRC, GSK3B
Pathway	P00026	Heterotrimeric G-protein signaling-Gi alpha and Gs alpha mediated	0.000146214	30	144	ADORA1, ARRB2, OPRL1, RGS5, CHRM1, PRKAR1B, PRKAR1A, PRKAR2A, PRKAR2B, CREB1, CREBBP, RGS16, RGS4, RAP1B, GNG12, GNG13, DRD2, GNG2, GNB1, GNAI1, GNAI2, GRK6, GRM2, GRM3, GRM4, GSK3B, SSTR4, HTR2C, KCNJ9, SNX13
MousePheno	MP:0009940	abnormal hippocampus pyramidal cell morphology	0.000146398	15	42	CDK5R1, MAPT, KALRN, ATRX, PAFAH1B1, KLF7, CLCN3, DAB1, DLG4, PTEN, FOXG1, SLC1A2, FUS, HDAC2, NR4A3
GeneOntologyBiologicalProcess	GO:0010676	positive regulation of cellular carbohydrate metabolic process	0.000146469	10	30	ADCYAP1R1, AKT1, SNCA, ARPP19, TCF7L2, STK11, SORBS1, SRC, HMGB1, HIF1A
GeneOntologyBiologicalProcess	GO:0034330	cell junction organization	0.000146544	18	80	TLN2, APC, SHROOM2, DST, PRKCI, PDPK1, GJC1, PLEC, PTEN, PTPRK, PTK2B, SDC4, GJA1, TNS1, SORBS1, JUP, ITGB4, NLGN2
Drug	CID000060814	remifentanil	0.000147574	11	32	TRAPPC9, OPRL1, CACNA1C, CACNB2, RP2, WIPF2, GRIN2A, GRINA, GRIN2C, GRIN2B, LPHN1
Interaction	HPRD:06532	CaMK II alpha subunit	0.000152211	12	32	ACTN4, CDK5R2, CDK5R1, MAPT, CAMK2A, DLG1, GFAP, CAMK2N2, GRIN2A, GRIN1, GRIN2B, ITPKA
Interaction	109161	Co-fractionation; Two-hybrid	0.000157347	6	9	CAMK2A, DLG1, DLG2, DLG4, GRIN1, GRIN2B
GeneOntologyMolecularFunction	GO:0030552	cAMP binding	0.000157917	8	20	PRKAR1B, PRKAR1A, PRKAR2A, PRKAR2B, PDE2A, PDE10A, RAPGEF4, HCN3
Drug	CID000002951	dantrolene	0.000159409	29	145	MBTPS1, CACNA1G, MGP, CA8, CACNB4, CACNB3, CACNA1B, CACNA1C, CACNA1A, CACNB1, CACNB2, CACNA2D1, NBL1, RTN4, CHKA, HIPK3, PIK3C2A, CACNA2D2, DMWD, CACNG2, CACNG3, GRM2, GRM3, GRM4, GRIN2A, GRINA, GRIN2C, GRIN2B, CACNG4
MousePheno	MP:0000746	weakness	0.000160856	25	91	ACHE, CDK5R2, AKT1, CDK5R1, APLP2, ARAF, RNF160, MCOLN1, CACNA1A, NOVA1, PI4K2A, PLP1, PIGA, PTEN, TPH2, SLC12A2, FGF14, SOD2, SNCA, GABBR1, TH, TNS1, GNAI2, SYNE1, AGTPBP1
Drug	D001464	Barium	0.00016158	17	66	CACNA1G, OPRM1, CACNB4, CACNB3, CACNA1B, CACNA1C, CACNA1A, CACNA2D1, DRD2, SLC8A1, SGK1, GNG2, SGK3, CACNG2, CACNG3, GNB1, PLCB1
Drug	CID000006468	phencyclidine	0.000164896	34	181	ACHE, PCP2, CHRNA6, NAA30, OPRL1, OPRM1, ANAPC1, TMOD3, NOVA2, PFKL, FXR2, DYRK1A, DRD2, SLC18A2, PDE10A, SLC1A2, FMR1, FOS, ZFPM1, GRM2, GRM3, GRM4, GRIA4, GRIN2A, GRIN1, GRIK5, GRINA, GRIN2C, GRIN2B, HSPA4, HTR2C, KPNB1, HECW1, NUFIP2
Drug	D010100	Oxygen	0.000166469	24	111	ACO2, MT3, AKT1, NFKBIA, CDKN1A, MAPK9, MAPK8, MAPK1, PRKCD, PLCG1, DCC, SLC8A1, SOD2, SOD1, SLC1A2, SLC2A1, FOS, TH, GJA1, SRC, GRIN1, HSPB1, HIF1A, VEGFB
Drug	CID000003932	linopirdine	0.000167103	13	43	ANK3, ATP2B2, ATP2B1, OPRL1, SLC17A7, CHRM1, ARFGAP1, FOS, TNS1, KCNMB4, KCNMA1, KCNQ2, KCNC1
Drug	C016601	4-hydroxytamoxifen	0.000172693	25	118	APOD, MGP, SLC39A6, NCL, DDX3Y, TRAK2, ARNT2, DHX9, EIF5, SON, SFRS1, GH1, TMPO, TOP2B, NUS1, SULT1A1, HSPA8, HSPA4, HMGB1, TXNRD1, HSP90B1, KPNB1, JAK2, FYTTD1, TNPO1
Pathway	avb3_opn_pathway	Osteopontin-mediated events	0.000174286	11	31	NFKBIA, MAPK8, MAPK1, PIK3CA, PIK3R1, RAC1, PTK2B, FOS, VAV3, GSN, ITGAV
Interaction	HPRD:00697	N-methyl D-aspartate receptor subunit 2B	0.000175322	13	37	CAMK2D, CAMK2A, ARHGAP32, EXOC4, PRKCG, PLCG1, PIK3CA, DLG1, DLG2, DLG4, SRC, GRIN1, GRIN2B
Pathway	hsa04150	mTOR signaling pathway	0.000179783	15	52	AKT1, MAPK1, AKT3, PDPK1, PIK3CA, PIK3R1, RICTOR, CAB39, EIF4B, RPS6, DDIT4, STK11, HIF1A, VEGFB, CAB39L
Drug	CID000102191	2-deoxyglucose	0.000181552	46	272	ADCY1, AKT1, MAP1B, MBP, PACSIN1, DST, JPH3, NOVA2, NPY, POMC, EXOC4, CNR1, PPP1R3C, CRK, AKT3, PIK3C2A, PIK3CA, PIK3R1, FXR2, SRR, DUSP8, RCAN1, ATN1, IMMT, FOXG1, SLC2A1, SLC2A3, FMR1, FOS, GNAQ, GFAP, STK11, HCRT, SORBS1, RAB3C, SST, HYOU1, HSPA4, HIF1A, IGF2, HSP90B1, TPR, SYNM, ZDHHC17, PPP1R1B, NUFIP2
Pathway	h_dreampathway	Repression of Pain Sensation by the Transcriptional Regulator DREAM	0.000182209	6	10	POLR2A, PRKAR1B, CREB1, CREBBP, FOS, KCNIP3
Pathway	PW:0000455	Excitatory synaptic transmission	0.000182209	6	10	DRD2, GRIN2A, GRIN1, GRIN2B, KCND2, KCND3
Pathway	hsa04120	Ubiquitin mediated proteolysis	0.000182852	29	139	HERC1, TRIM37, UBA3, MDM2, XIAP, MID1, ANAPC1, PIAS1, CUL4B, CBL, CUL3, NEDD4, CDC27, UBE2J1, KEAP1, TRIP12, WWP1, UBE2R2, UBA6, UBE2W, PRPF19, UBE2K, UBE2L3, UBE3A, UBE2B, UBE2D3, UBE2G2, CUL5, FBXW11
GeneOntologyCellularComponent	GO:0005901	caveola	0.000182898	15	62	ABCA1, ADCYAP1R1, BMPR1A, CACNA1C, CBL, CDH13, PTGS2, SLC8A1, SLC2A1, SLC2A3, GNAQ, SORBS1, SRC, KCNMA1, JAK2
Drug	CID000003954	loperamide	0.000184081	23	105	CACNA1G, OPRL1, OPRM1, CACNB4, CACNB3, CACNA1B, CACNA1C, CACNA1A, CACNB1, CACNB2, CACNA2D1, POMC, PRKCI, PRKCG, PRKCD, CACNA2D2, CACNG2, CACNG3, SST, GRIN2A, GRIN2C, GRIN2B, CACNG4
Domain	PF00018	SH3_1	0.00018412	27	128	MATK, NGEF, PACSIN1, DST, CACNB4, CACNB1, CACNB2, CRKL, CRK, PLCG1, PIK3R1, DLG1, DLG2, DLG4, CTTN, SH3GL2, EPS8, RUSC1, VAV3, AHI1, STAM2, ARHGAP12, SORBS1, SRC, ARHGAP33, FNBP1, LASP1
Drug	CID000005665	vigabatrin	0.000185175	14	49	POMC, SLC6A13, GABRA3, GABRA4, GABRA6, GABRA1, GABRA2, GABRG1, GABRG2, GABRB2, GABRB3, GABRD, GAD2, GAD1
MousePheno	MP:0005404	abnormal axon morphology	0.000187929	31	124	ABCA2, ABCD2, MAP1B, MAPT, MBP, DCLK1, SLC17A7, DST, CACNA1A, NCAM1, HAPLN2, POU3F1, PI4K2A, CLCN6, PLP1, PLEC, CACNA2D2, QKI, EPHA4, EPHA7, SNCA, SCN1B, GABBR1, ZNF24, UGCG, TYROBP, KLC1, TRIM2, SBF2, KIF2A, ITGB4
Interaction	111568	Affinity Capture-Western	0.000188099	4	4	PRKCG, GABRA4, GABRA1, GRIA4
Interaction	HPRD:05943	Chloride intracellular channel 4	0.000188099	4	4	ACTB, CLIC4, DNM1, YWHAZ
Interaction	HPRD:16199	Protein phosphatase 1A magnesium dependent alpha isoform	0.000188399	8	16	MSN, AKT1, CACNA1B, CACNA1C, CACNA1A, PRKCD, PIK3R1, GRM3
Interaction	HPRD:03943	Regulator of G protein signaling 12	0.000188399	8	16	ARAF, CACNA1B, MAP2K2, GNAI1, GNAI2, GRM2, YWHAG, PLCB1
Interaction	HPRD:09260	DAP1	0.000188399	8	16	APC, DLGAP1, DLG1, DLG2, DLG4, DLGAP3, GRIN2A, GRIN2C
Interaction	HPRD:01140	Microtubule associated protein 2	0.000188399	8	16	ACTB, MAP2, PAFAH1B1, PRKAR2A, CPEB1, PLEC, GRIN1, MARK4
GeneOntologyBiologicalProcess	GO:0006813	potassium ion transport	0.000188618	31	180	ADORA1, ATP1B2, KCNAB2, PLCB4, KCTD17, DLG1, DRD2, KCNIP4, SLC12A2, SCN1A, CHP, GNAQ, HCRT, KCNMB4, KCNMA1, KCNQ2, KCNJ9, KCND2, KCNC4, KCNC3, KCNC1, KCNB1, KCNF1, KCND3, KCNA6, KCNA2, HCN3, KCNIP2, KCNIP3, KCNAB1, SLC12A5
Pathway	P00005	Angiogenesis	0.000189298	30	146	DLK1, AKT1, APC, ARAF, PRKCI, MAPK8, MAPK6, MAPK1, PRKCG, PRKCD, CRKL, CRK, AKT3, PDGFA, PDGFRA, PLCG1, PIK3C2A, PIK3CA, MAPK14, PIK3R1, FGFR1, FGFR3, MAP2K4, F3, FOS, TCF7L2, APC2, GSK3B, HIF1A, JAK1
Drug	D000535	Aluminum	0.000195335	15	55	ACHE, ACLY, ACO2, MAPT, OGDH, MAPK1, PLCG1, PTGS2, SLC2A1, GNAQ, GFAP, TF, TFRC, HIF1A, PLCB1
Interaction	HPRD:01095	YB-1	0.000196454	10	24	SFRS12, AKT1, NFYB, MAPK1, PURA, SLC6A4, FUS, FMR1, GSK3B, HABP4
MousePheno	MP:0000852	small cerebellum	0.000197378	28	108	CDK5R2, CDK5R1, ANK3, MDM2, DCLK1, ATP2B2, CACNA1A, NEUROD2, NEUROD1, CRKL, CRK, PDHA1, DNM1L, PLCB4, DAB1, CACNA2D2, RORA, EPB41L2, PURA, SCN8A, CIT, GJA1, FOXP2, ZIC1, UBE3A, TXNRD1, INPP4A, AGTPBP1
MousePheno	MP:0003360	abnormal depression-related behavior	0.00019825	15	43	MAOA, BAI2, OPRM1, SLC17A7, CACNA1C, TPH2, SLC18A2, SLC6A4, S100A10, GABBR1, GABRD, GAD2, GSK3B, GRIN2A, NR3C1
MousePheno	MP:0000771	abnormal brain size	0.00019939	37	158	BCL2L1, MCOLN1, NCAM1, NEUROD1, NFIX, CDKN1A, CLCN3, AKT3, ATF2, PDHA1, CACNA2D2, PTEN, DYRK1A, NEUROD6, EPB41L2, MARK2, PTPRS, FGFR2, SLC2A1, SCN1A, ATXN1, CIT, ATE1, TH, GNB1, TOP2B, NDE1, TBR1, FOXP2, HDAC2, ZNF24, SPEN, BHLHE22, UBE3A, KIF5C, KIF1B, PLCB1
GeneOntologyMolecularFunction	GO:0005262	calcium channel activity	0.000200262	18	82	CACNA1G, CACNB4, CACNB3, CACNA1B, CACNA1C, CACNA1A, CACNB1, CACNB2, CACNA2D1, CACNA2D2, CACNG2, CACNG3, GRIN2A, GRIN1, GRIN2B, TRPC5, CUL5, CACNG4
Drug	C518576	2-methylbutyric acid 4-((1,3)dioxan-5-ylmethoxyimino)-8-(2-(4-hydroxy-6-oxo-tetrahydropyran-2-yl)ethyl -7-methyl-6-oxo-1,2,3,4,6,7,8,8a-octahydronaphthyl)heptanoate	0.000205732	10	28	VPS33A, NFKBIA, PNN, PJA2, PDK4, PDPK1, SLC12A2, RAPGEF4, XRN2, ERRFI1
GeneOntologyCellularComponent	GO:0017146	N-methyl-D-aspartate selective glutamate receptor complex	0.000207385	5	8	EPS8, GRIN2A, GRIN1, GRIN2C, GRIN2B
Pathway	reg_gr_pathway	Glucocorticoid receptor regulatory network	0.000210226	20	82	AKT1, CDK5R1, MDM2, PBX1, POMC, CDKN1A, MAPK9, MAPK8, MAPK1, PRKACB, CREB1, CREBBP, MAPK14, FKBP5, SGK1, FOS, HDAC2, NCOA2, GSK3B, NR3C1
Interaction	HPRD:03007	Synapse associated protein 97	0.000210917	19	68	MPP2, MAP1A, ATP2B2, CAMK2A, DLGAP1, DLG1, DLG2, GNG13, PTEN, GDA, CACNG2, DLGAP3, GRIK2, GRIN2A, GRIN2B, DLGAP4, KCNA2, KCNAB1, KIF1B
GeneOntologyCellularComponent	GO:0005874	microtubule	0.000211493	43	286	TUBB2B, MAP1B, MAP1A, MAP2, MAPT, APC, SHROOM2, MID1, ARHGEF2, KIF1A, PAFAH1B1, DNM3, CDC27, TBL1XR1, DYNC1LI2, DNM1, KIFC2, CEP57, NAV1, MID2, DYNC1LI1, CAMSAP1, DYNLT3, DYNLT1, NDE1, APC2, EML2, TBL1X, HAUS2, APPBP2, SS18, KLC1, KIF2A, CLASP1, KIF5A, KIF5B, KIF5C, KIF1B, CLASP2, MTUS1, HOOK3, VPS41, MTUS2
Pathway	TUBBYPATHWAY	TUBBYPATHWAY	0.000212727	5	7	CHRM1, GNAQ, GNB1, HTR2C, PLCB1
Pathway	h_gabaPathway	Gamma-aminobutyric Acid Receptor Life Cycle	0.000212727	5	7	UBQLN1, DNM1, GABRA3, GPHN, SRC
GeneOntologyMolecularFunction	GO:0030674	protein binding, bridging	0.000214537	21	104	CHN1, COL1A2, CRKL, CRK, FSCN1, SH3BGR, SH3BGRL, EPS8, RUSC1, GAB1, FLRT2, VAV3, TP53BP2, STX1A, SORBS1, SRC, GRB10, ST13, SYNM, CBX5, LASP1
Interaction	HPRD:00277	Casein kinase II, alpha 1	0.00021514	36	168	ABCA1, SFRS12, MAZ, MAX, MEF2C, AQP4, ARRB2, PAFAH1B1, OGT, NCL, NFKBIA, CDKN1A, PPP2R4, PPP1R2, ATF2, CREBBP, CSNK2A1, PTEN, EIF5, SLC18A2, SNCA, HSPH1, FOS, TH, UBE2R2, GMFB, TCF7L2, STX1A, GTF2A1, HDAC2, SPTBN1, YWHAB, HMGA1, HIF1A, HSP90B1, PPP1R1B
Drug	CID000005413	tetraethylammonium	0.000222184	41	236	ACHE, ACCN2, CACNA1C, CACNB2, CACNA2D1, CHRM1, PRKCI, PRKAR1A, PRKCG, PRKCD, PRKAR2A, PRKAR2B, PRKACB, SCN3B, DCN, SLC22A8, NRXN2, PTGS2, NPEPPS, SLC15A2, PTK2B, SGK3, SCN1B, ABCB8, GUCY1B3, YME1L1, KCNMB4, VIP, KCNMA1, KCNQ2, KCNJ9, KCND2, KCNC4, KCNC3, KCNC1, KCNB1, KCNF1, KCND3, KCNA6, KCNA2, KCNAB1
GeneOntologyMolecularFunction	GO:0035255	ionotropic glutamate receptor binding	0.000223052	5	8	DLG1, DLG4, DRD2, CACNG2, GSK3B
GeneOntologyBiologicalProcess	GO:0015810	aspartate transport	0.000224723	5	8	SLC25A12, PRKCD, SLC1A6, SLC1A1, SLC1A2
GeneOntologyBiologicalProcess	GO:0051932	synaptic transmission, GABAergic	0.000227229	9	26	ADORA1, CACNB4, CACNA1A, CNR1, DRD2, NISCH, GABRA6, GABRB3, STXBP1
GeneOntologyBiologicalProcess	GO:0016079	synaptic vesicle exocytosis	0.000227229	9	26	SV2B, CPLX2, STXBP1, STX1A, VAMP2, GRIK5, RPH3A, NLGN1, PCLO
Drug	D004026	Dieldrin	0.00022732	30	155	ACVR1C, NTRK3, NTRK2, CHRM1, MAP2K2, MAPK1, PRKCD, PDGFRA, COMT, SLC18A2, SLC6A4, FGFR1, SOD2, SOD1, SNCA, FZD2, GABRA1, GABRA2, TH, GJA1, GABRG1, GABRG2, GABRB2, GABRB3, GFAP, GRIN1, GRINA, GRIN2C, GRIN2B, HTR2C
MousePheno	MP:0003106	abnormal fear-related response	0.000228322	14	39	ABCA2, ADCY1, MAOA, MAP2, UBR1, GIT1, PTCH1, FXR2, GABRA1, GABBR1, FMR1, GM2A, GRIK2, TRPC5
Pathway	PDGFPATHWAY	PDGFPATHWAY	0.00022939	10	27	MAPK8, PDGFA, PDGFRA, PLCG1, PIK3CA, PIK3R1, CSNK2A1, MAP2K4, FOS, JAK1
Pathway	ARENRF2PATHWAY	ARENRF2PATHWAY	0.000230534	7	14	MAFG, KEAP1, MAPK8, MAPK1, CREB1, MAPK14, FOS
GeneOntologyBiologicalProcess	GO:0016055	Wnt receptor signaling pathway	0.000231224	31	182	FBXW2, APC, ZEB2, NLK, CDK14, CSNK2A1, CSNK1D, TBL1XR1, SLC9A3R1, DRD2, CELSR2, FGFR2, SENP2, RSPO2, ZRANB1, CCNY, FZD2, LEF1, TLE4, TCF7L2, APC2, STK11, TBL1X, DIXDC1, GSK3B, WNT8B, UBE2B, JUP, HBP1, DKK3, FBXW11
Drug	CID000016362	pimozide	0.000231316	26	127	CALN1, CACNA1G, OPRL1, OPRM1, CACNB4, CACNB3, CACNA1B, CACNA1C, CACNA1A, CACNB1, CACNB2, CACNA2D1, KRIT1, CHRM1, POMC, CACNA2D2, DTNA, DRD2, TH, CLDN5, CACNG2, CACNG3, SOX10, SST, HTR2C, CACNG4
Drug	CID000000836	L-dopa	0.000234161	36	199	ADCY1, TUBB2B, MT3, MAOA, MAPT, API5, PINK1, POMC, CNR1, COMT, SOCS6, ZFHX4, DRD2, TPH2, PTN, SLC18A2, SOD2, SNCA, SLC1A2, FOS, TH, GH1, TMPO, GAD2, GAD1, ZFPM1, TAC3, SST, GRIN2A, GRINA, GRIN2C, GRIN2B, SLC7A5, ATP13A2, PPP1R1B, HBP1
Pathway	hsa04810	Regulation of actin cytoskeleton	0.000236169	40	218	ACTB, MSN, ACTN4, APC, ARAF, ARHGEF1, PAK3, PPP1R12A, CHRM1, MAP2K2, MAPK1, CRKL, CRK, PDGFA, PDGFRA, ARPC3, ARPC1B, PIK3CA, PIK3R1, PIP4K2A, RDX, GNG12, GIT1, RAC1, FGFR1, FGFR3, FGFR2, SSH1, FGF13, FGF14, IQGAP2, BAIAP2, VAV3, APC2, GNA13, GSN, PIP5K1C, ITGB4, ITGB5, ITGAV
MousePheno	MP:0001513	limb grasping	0.000237611	30	120	MAFG, ARAF, SLC6A5, ATP2B2, NTRK3, OPA1, PAFAH1B1, DST, RNF160, MCOLN1, CACNA1A, JPH3, NFIX, STRBP, PI4K2A, CACNA2D2, RORB, RORA, HIPK2, EPHA4, DNAJC5, FGF14, SCN8A, ATXN1, GLRA1, GABRB3, GAD1, UGCG, UBE3A, SBF2
Drug	C118559	1-bromopropane	0.000241236	8	19	BCL2L1, NFKBIA, MAPK1, CREB1, DRD2, GABRA1, GABRG2, HTR2C
Drug	C045651	epigallocatechin gallate	0.000243378	32	170	AKT1, XIAP, MCL1, BCL2L1, NFKBIA, CCNG2, CCNG1, CDH13, CDKN1A, MAPK8, MAPK1, HDAC5, PFKL, COMT, PIGA, RBBP4, PTGS2, ELAVL3, SOD2, SLC2A1, SCD, TIMP3, TOP2B, MGEA5, GSK3B, NR3C1, HSPA1B, HIF1A, ID2, ITGB4, GPAM, ITGAV
GeneOntologyCellularComponent	GO:0043195	terminal button	0.000244533	11	38	ADORA1, NTRK2, SNCA, SNCB, TH, GABRB3, GRIA3, GRIA4, GRIK2, GRIK5, KCNMA1
GeneOntologyCellularComponent	GO:0043083	synaptic cleft	0.000251441	4	5	GABRA6, GRIA3, GRIN1, GRIN2B
Pathway	P00019	Endothelin signaling	0.000253794	17	65	AKT1, ARAF, MAP2K2, PRKCI, MAPK1, PRKAR1B, PRKAR1A, PRKCG, PRKCD, PRKAR2A, PRKAR2B, AKT3, PIK3C2A, PIK3CA, PIK3R1, EDN3, PTGS2
Pathway	hsa05214	Glioma	0.000253794	17	65	AKT1, MDM2, ARAF, CAMK2D, CAMK2A, CDKN1A, MAP2K2, MAPK1, PRKCG, AKT3, PDGFA, PDGFRA, PLCG1, PIK3CA, PIK3R1, PTEN, SHC3
Pathway	hsa05211	Renal cell carcinoma	0.000257387	18	71	AKT1, ARAF, PAK3, MAP2K2, ARNT2, MAPK1, CRKL, CRK, AKT3, CREBBP, PIK3CA, PIK3R1, RAP1B, RAC1, SLC2A1, GAB1, HIF1A, VEGFB
GeneOntologyBiologicalProcess	GO:0009914	hormone transport	0.000257976	30	175	ACVR2B, ADORA1, SYT7, ACVR1C, CHRNA6, CACNA1C, RTN4, CD38, NEUROD1, PINK1, CNR1, CREB1, PFKL, CHD7, CRYM, EDN3, DRD2, RIMS2, SNCA, NISCH, GABBR1, RAPGEF4, TCF7L2, STX1A, MGEA5, SERP1, RPH3A, YWHAZ, PCLO, JAK2
GeneOntologyBiologicalProcess	GO:0015807	L-amino acid transport	0.000267553	10	32	APBA1, CACNB4, CACNA1A, SLC43A2, SLC1A1, SLC1A2, GABBR1, HTR2C, SLC7A5, SERINC1
Interaction	HPRD:18146	TANC	0.000270417	7	13	ACTB, CAMK2A, DLGAP1, DLG1, DLG4, HOMER1, GRIN2B
Drug	C412373	AG 1879	0.000272049	11	34	AKT1, NFKBIA, MAP2K2, MAPK9, MAPK8, MAPK1, PRKCD, CREB1, FOS, SRC, HIF1A
GeneOntologyMolecularFunction	GO:0031072	heat shock protein binding	0.000275336	18	84	SACS, DNAJA3, DNAJC18, OGDH, NFKBIA, DNAJC6, DNAJB6, DNAJC5, SLC8A1, FKBP5, SNCA, DNAJB14, DNAJB4, GUCY1B3, HDAC2, ST13, NR3C1, HIF1A
GeneOntologyMolecularFunction	GO:0031625	ubiquitin protein ligase binding	0.000276628	12	44	ARRB2, CUL4B, CUL3, NFKBIA, POLR2A, NLK, C10orf46, GRIK2, HSPA1B, UBE2K, UBE2B, CUL5
MousePheno	MP:0001491	unresponsive to tactile stimuli	0.000277242	9	19	CDK5R2, CDK5R1, MAP1B, KIF1A, SLC17A7, KLF7, MAPK6, DLG2, KIF1B
GeneOntologyCellularComponent	GO:0009898	internal side of plasma membrane	0.000277255	9	27	MSN, CACNB4, DLG4, FGFR3, RUNDC3A, TH, GM2A, JUP, ERRFI1
Drug	CID000004041	medazepam	0.000280147	9	24	TRIM37, GABRA4, GABRA6, GABRA1, GABRA2, GABBR1, GABRG1, GABRG2, GABRB2
MousePheno	MP:0009757	impaired behavioral response to morphine	0.000281095	6	9	GRASP, OPRL1, OPRM1, CNR1, RGS4, PPP1R1B
Drug	CID000004064	meprobamate	0.000282543	20	88	ACHE, ADAM10, ALAS2, PCP2, ASS1, BMP1, CUL3, CPM, MDGA2, GIT1, TBPL1, PTPN3, PTPRK, OS9, GABRA4, GABRA6, GABRA1, GABRA2, TH, TTR
Drug	CID000003224	endosulfan	0.000282543	20	88	ACHE, VPS33A, NFKBIA, SERINC3, TRIM44, GABRA3, GABRA4, GABRA6, GABRA1, GABRA2, CIT, GJA1, GABRG1, GABRG2, GABRB2, GABRB3, GABRD, HSPB1, HSP90B1, MIER1
GeneOntologyCellularComponent	GO:0031252	cell leading edge	0.000282629	31	187	RAPH1, TLN2, ADORA1, AKT1, OPRM1, PAFAH1B1, GAS7, CNTNAP2, TMOD3, ARPC3, PDE4A, PARVA, PIK3CA, RDX, SLC9A3R1, CTTN, RAC1, PTPRK, SSH1, ITSN1, SLC1A2, GABBR1, CIT, BAIAP2, TESC, GSN, TPM1, KCNB1, ITGB5, DDN, SLC12A5
MousePheno	MP:0009749	enhanced behavioral response to addictive substance	0.000283827	12	31	OPRM1, CACNA1B, PRKCG, PRKAR2B, DLG4, HOMER1, SLC18A2, GNAZ, GRK6, KCNC3, KCNC1, PPP1R1B
Pathway	txa2pathway	Thromboxane A2 receptor signaling	0.000284644	15	54	AKT1, ARRB2, ARHGEF1, PRKCG, PRKCD, MAPK14, SLC9A3R1, DNM1, RAC1, GNG2, GNAQ, GNB1, GNAI2, GNA13, SRC
Drug	DB00142	L-Glutamic Acid	0.000288283	17	69	GMPS, BCAT1, PET112L, SLC1A6, SLC1A1, SLC1A2, GAD2, GAD1, GRM4, GRIA3, GRIA4, GRIK2, GRIN2A, GRIN1, GRIK5, GRIN2C, GRIN2B
Pathway	h_eif4Pathway	Regulation of eIF4e and p70 S6 Kinase	0.000292521	9	23	AKT1, MAPK1, PDPK1, PIK3CA, MAPK14, PIK3R1, PTEN, EIF4A1, EIF4G1
Pathway	a4b1_paxindep_pathway	Paxillin-independent events mediated by a4b1 and a4b7	0.000292521	9	23	CBL, CRKL, CRK, PIK3CA, PIK3R1, GIT1, RAC1, SRC, JAK2
Pathway	lymphangiogenesis_pathway	VEGFR3 signaling in lymphatic endothelium	0.000292521	9	23	AKT1, MAPK1, COL1A2, CRK, CREB1, PIK3CA, MAPK14, PIK3R1, MAP2K4
MousePheno	MP:0000889	abnormal cerebellar molecular layer	0.000293624	16	49	CDK5R1, ANK3, ATP2B2, CACNA1A, NFIA, CRKL, CRK, PDHA1, RORA, PTEN, PURA, IL1RAPL1, GM2A, FOXP2, GRIN2C, KLHL1
MousePheno	MP:0000886	abnormal cerebellar granule layer	0.000294473	24	89	CDK5R1, MDM2, MLL, ATP2B2, ATP1B2, NEUROD1, NFIB, NFIA, CP, CRKL, CRK, PDHA1, DAB1, RORA, PTEN, PURA, MAP2K4, SCN8A, CIT, GJA1, GM2A, GRIN2C, CBLN3, AGTPBP1
Pathway	hsa05210	Colorectal cancer	0.0002973	20	84	AKT1, APC, ARAF, ACVR1C, APPL1, MAPK9, MAPK8, MAPK1, AKT3, PDGFRA, PIK3CA, PIK3R1, DCC, RAC1, FZD2, FOS, LEF1, TCF7L2, APC2, GSK3B
Pathway	P00027	Heterotrimeric G-protein signaling-Gq alpha and Go alpha mediated	0.00029776	23	103	ADORA1, ARHGEF1, OPRL1, CACNA1B, CACNA1A, RGS5, CHRM1, PRKCI, PRKCG, PRKCD, RGS16, RGS4, RAP1B, GNG12, GNG13, DRD2, GNG2, GNB1, GRM2, GRM3, GRM4, SSTR4, KCNJ9
GeneOntologyBiologicalProcess	GO:0007194	negative regulation of adenylate cyclase activity	0.000298594	14	57	ADCY1, ADORA1, OPRL1, OPRM1, PALM, EDNRB, DRD2, GABBR1, GNAZ, GNAI1, GNAI2, GRM2, GRM3, GRM4
Drug	CID000004425	naloxone	0.000302199	46	278	ACLY, ACTB, ADCY1, ADORA1, CHRNA6, MGP, SULT4A1, OPRL1, OPRM1, CACNA2D1, NPY, CHRM1, POMC, CNR1, PRKCG, CREB1, COMT, CYLD, DRD2, PTK2B, FSCN1, GABRA4, GABRA6, GABRA1, GABRA2, FOS, TH, GABRG1, GABRG2, GABRB2, TAC3, HCRT, GRM2, GRM3, GRM4, SST, GRIA3, GRIA4, GRIK2, GRIN2A, GRIK5, GRINA, GRIN2C, GRIN2B, VIP, TTR
MousePheno	MP:0009538	abnormal synapse morphology	0.000307429	23	84	APLP2, KIF1A, NTRK2, SLC17A7, SLC17A6, CAMK2A, CACNB4, CLCN3, CACNA2D2, DNM1, EDNRB, DTNA, SLC18A2, DNAJC5, FGFR2, SCN8A, CACNG2, GABRG2, GPHN, GRIN2B, SYNE1, KIF1B, MYCBP2
Pathway	ecadherin_nascentaj_pathway	E-cadherin signaling in the nascent adherens junction	0.00031343	12	38	AKT1, CRK, PIK3CA, PIK3R1, CSNK2A1, RAP1B, DLG1, CTTN, RAC1, SRC, PIP5K1C, JUP
Drug	CID000023991	xenon	0.000331287	20	89	MBP, ATP2B2, ATP2B1, CACNA1A, NR1D2, CREB1, MAPK14, CNOT8, SSX2IP, ATN1, FMR1, GRM3, GRIA3, GRIA4, GRIN2A, GRINA, GRIN2C, GRIN2B, ATP2C1, CYGB
GeneOntologyBiologicalProcess	GO:0008088	axon cargo transport	0.000336984	7	17	APBA1, KIF1A, OPA1, PAFAH1B1, DST, KLC1, KIF1B
GeneOntologyBiologicalProcess	GO:0014046	dopamine secretion	0.000336984	7	17	CHRNA6, RTN4, PINK1, CNR1, DRD2, SNCA, GABBR1
Drug	CID000003589	heptachlor	0.00034037	26	130	RNGTT, MAPK1, PLCB4, PLCG1, PLEC, SLC18A2, SERINC3, TRIM44, GABRA3, GABRA4, GABRA6, GABRA1, GABRA2, GJA1, TCF12, GABRG1, GABRG2, GABRB2, GABRB3, GABRD, TF, TFRC, PTP4A2, NTAN1, PDS5B, PLCB1
GeneOntologyBiologicalProcess	GO:0070646	protein modification by small protein removal	0.000345895	8	22	OTUD7B, USP9X, OTUB1, SENP2, USP12, USP22, USP7, WDR48
GeneOntologyBiologicalProcess	GO:0010639	negative regulation of organelle organization	0.00035103	22	115	ADD1, MAP1B, MAP1A, MAP2, MAPT, APC, SHROOM2, MID1, ARHGEF2, TMOD3, RDX, SNCA, ERCC4, SGK1, SPTBN1, GSN, HMGA1, UBE2B, TPM1, TPR, CLASP1, CLASP2
GeneOntologyBiologicalProcess	GO:0002790	peptide secretion	0.00035103	22	115	ABCA1, ACVR2B, ADORA1, SYT7, ACVR1C, CACNA1C, CD38, NEUROD1, CNR1, PFKL, CHD7, EDN3, DRD2, RIMS2, GABBR1, RAPGEF4, TCF7L2, STX1A, MGEA5, SERP1, PCLO, JAK2
Drug	CID000005355	sulpiride	0.000351599	21	96	ADCY1, OPRL1, OPRM1, NPY, CHRM1, POMC, CNR1, DRD2, AGAP3, FOS, TH, GAD2, GAD1, SOX10, SST, GRIN2A, GRINA, GRIN2C, GRIN2B, HTR2C, PPP1R1B
GeneOntologyBiologicalProcess	GO:0032409	regulation of transporter activity	0.000352642	12	45	ACTN4, CACNA1G, SYNGR3, CACNB4, JPH3, PLCG1, SLC9A3R1, HOMER1, SNCA, IL1RAPL1, GNAI2, NCS1
MousePheno	MP:0008569	lethality at weaning	0.000353324	24	90	ATP1B2, SLC17A7, CACNA1A, ATRN, JPH3, NFIX, CLCN3, ATF2, PLP1, SLC9A3R1, RORA, FGFR3, ERCC4, SCN1B, GABRB3, FOXP2, SOX10, UGCG, KIF5A, KCNC3, KCNC1, INPP4A, SYT2, PLCB1
GeneFamily	UBE2	Ubiquitin-conjugating enzymes E2	0.000357829	9	48	UBE2J1, UBE2R2, UBE2W, UBE2K, UBE2L3, UBE2V2, UBE2B, UBE2D3, UBE2G2
Drug	D020001	1-Butanol	0.00036075	16	64	ABCA1, AKT1, OPRM1, MAPK1, PRKCD, CREB1, PTGS2, PTK2B, SLC2A1, GABRA1, RPS6, FOS, GH1, GABRG2, GABRB2, GRIA3
Drug	CID000004902	pregnenolone sulfate	0.00036075	16	64	SLC17A6, POMC, PRKCI, GABRA4, GABRA6, GABRA1, GABRA2, GABRG1, GABRG2, GABRB2, GRIA3, GRIK2, GRIN2A, GRINA, GRIN2C, GRIN2B
Pathway	hsa04520	Adherens junction	0.000364504	19	79	ACTB, ACTN4, ACVR1C, PVRL3, MAPK1, NLK, CREBBP, CSNK2A1, SSX2IP, RAC1, FGFR1, WASF3, BAIAP2, LEF1, TCF7L2, MAP3K7, SORBS1, SRC, LMO7
Pathway	EPONFKBPATHWAY	EPONFKBPATHWAY	0.000365593	6	11	NFKBIA, CDKN1A, SOD2, GRIN1, HIF1A, JAK2
Pathway	PW:0000578	scatter factor/hepatocyte growth factor signaling	0.000365593	6	11	CBL, CRKL, PLCG1, PIK3R1, GAB1, SRC
Drug	CID016738692	PtdIns	0.000365939	35	196	ACTB, AKT1, EEA1, SPOP, DGKE, PNPLA2, CUL3, WIPI2, CHRM1, PRKCI, MAPK1, PRKCG, PRKCD, CRK, AKT3, PDPK1, PLCB4, PLCL1, PIK3C2A, PIK3CA, PIK3R1, AGK, RNF130, DGKG, DGKB, RAP1B, VAMP3, PTPN3, SSH1, PITPNB, GNAQ, GSK3B, HSPA4L, SBF2, PLCB1
Drug	CID000004158	methylphenidate	0.000377407	23	110	CDK5R1, MAOA, KITLG, RTN4, CDH13, NOVA2, COMT, FXR2, DRD2, TPH2, SLC18A2, SLC6A4, FGF14, FOXG1, SCN8A, FMR1, FOS, TH, SST, IDS, KCNMA1, PPP1R1B, SUZ12
GeneOntologyMolecularFunction	GO:0003714	transcription corepressor activity	0.000383919	28	163	MXI1, SCAI, MEIS2, PIAS1, IRF2BP2, HIPK1, HDAC5, HIPK3, CRYM, HR, TBL1XR1, HIPK2, ATN1, DR1, NCOR2, SFRS2, TLE4, RLIM, TCF4, ZFPM1, TBL1X, MXD4, YWHAB, SF1, SPEN, KLF12, RBM9, KCNIP3
Drug	CID000003598	hexachlorophene	0.000387208	20	90	MOBP, OPRL1, CANX, CACNA1B, CACNA1A, CACNA2D1, OLA1, RAB2A, GRM2, GRM3, GRM4, GRIA3, GRIA4, SSTR4, GRIK2, GRIN2A, GRIK5, GRINA, GRIN2C, GRIN2B
Drug	CID000127894	LY293558	0.000392191	10	30	GRM2, GRM3, GRIA3, GRIA4, GRIK2, GRIN2A, GRIK5, GRINA, GRIN2C, GRIN2B
Drug	D001640	Bicuculline	0.000397636	5	8	HDAC5, GABRA1, GABRG1, GABRG2, GABRB3
Drug	C404397	NSC 680410	0.000399764	9	25	AKT1, XIAP, MCL1, BCL2L1, MAP2K2, MAPK8, MAPK1, MAPK14, GSK3B
Drug	CID000038022	ganaxolone	0.000399764	9	25	CHN1, GABRA4, GABRA6, GABRA1, GABRA2, GABRG1, GABRG2, GABRB2, KCNQ2
Drug	CID000003448	gaboxadol	0.000413301	12	41	GABRA3, GABRA4, GABRA6, GABRA1, GABRA2, GABRG1, GABRG2, GABRB2, GABRB3, GABRD, HCRT, SLC12A5
GeneOntologyBiologicalProcess	GO:0030900	forebrain development	0.000414999	31	188	APLP2, DCLK1, ATRX, PAFAH1B1, BMPR1A, CNTNAP2, NFIB, POU3F1, ZEB2, CREB1, PCSK1, CX3CR1, DAB1, DRD2, NCOR2, RAC1, SLC6A4, FGFR3, FOXG1, SLC1A2, FABP7, LEF1, GNAQ, TOP2B, NDE1, FOXP2, TACC1, HDAC2, SRC, GRIN1, NDST1
GeneOntologyMolecularFunction	GO:0003729	mRNA binding	0.0004151	19	94	ADARB1, CELF4, NOVA1, CPSF3, HNRPDL, CPEB1, ELAVL2, EIF4A1, PURB, FMR1, SYNCRIP, RBM25, CELF1, SLU7, SSB, HNRNPA3, PTBP2, TARDBP, FYTTD1
GeneOntologyCellularComponent	GO:0005875	microtubule associated complex	0.000420351	24	134	MAP1B, MAP1A, MAP2, MAPT, MID1, KIF1A, PAFAH1B1, DYNC1LI2, KIFC2, RABGAP1, FNTB, MID2, DYNC1LI1, DYNLT3, DYNLT1, EML2, HAUS2, APPBP2, KLC1, KIF2A, KIF5A, KIF5B, KIF5C, KIF1B
Drug	D014284	Triiodothyronine	0.000423487	34	190	ADORA1, AKT1, NRGN, SULT4A1, BCL2L1, KLF9, NELF, MAPK1, COL1A2, PFKP, PCSK1, CSAD, PIK3CA, DIO2, FADS2, FGFR1, FGFR3, FGFR2, SOD1, FOXG1, SLC2A1, FOS, CAP1, GJA1, GH1, SULT1A1, NCOA2, NR3C1, HIF1A, ID2, TTR, ING2, KIF1B, LPL
Pathway	h_gpcrPathway	Signaling from G-Protein Families	0.00042523	9	24	ADCY1, PRKAR1B, CREB1, CREBBP, PLCG1, FOS, GNAQ, GNB1, GNAI1
Pathway	P00025	Hedgehog signaling	0.00042523	9	24	PRKAR1B, PRKAR1A, PRKAR2A, PRKAR2B, CREBBP, CSNK1D, PTCH1, GSK3B, FBXW11
Pathway	CXCR4PATHWAY	CXCR4PATHWAY	0.00042523	9	24	MAPK1, CRK, PLCG1, PIK3CA, PIK3R1, PTK2B, GNAQ, GNB1, GNAI1
GeneOntologyBiologicalProcess	GO:0045761	regulation of adenylate cyclase activity	0.000428792	21	109	ADCY1, ADCYAP1R1, ADORA1, NTRK2, OPRL1, OPRM1, PALM, EDNRB, DRD2, GABBR1, TIMP2, CAP2, CAP1, GNAQ, GNAZ, GNAI1, GNAI2, GNA13, GRM2, GRM3, GRM4
Drug	C011585	ciclopirox	0.000430185	4	5	MAPT, FKBP5, NR3C1, HIF1A
GeneOntologyCellularComponent	GO:0016580	Sin3 complex	0.000433569	5	9	CSNK2A1, RBBP4, MORF4L1, HDAC2, ING2
GeneOntologyCellularComponent	GO:0031201	SNARE complex	0.000437227	8	23	VAMP3, GOSR1, CPLX2, VTI1A, SCAMP5, STX1A, VAMP7, VAMP2
GeneOntologyBiologicalProcess	GO:0008286	insulin receptor signaling pathway	0.000437509	14	59	AKT1, APPL1, PRKCD, PDPK1, PIK3R1, ZFP106, EIF4EBP2, GAB1, BAIAP2, PHIP, SORBS1, SRC, GRB10, IGF2
Drug	D005996	Nitroglycerin	0.000438649	25	125	ACTB, MXI1, NCAM1, SLC4A4, CNR1, CP, PDE1A, PDE2A, PTGDS, DYRK1A, FGFR2, SDC4, FOS, TMPO, SNRK, TCF4, GUCY1B3, GUCY1A3, CELF2, GRK6, GSN, YWHAZ, PCSK1N, HIF1A, ID2
Pathway	pi3kciaktpathway	Class I PI3K signaling events mediated by Akt	0.000439602	11	34	AKT1, CDKN1A, AKT3, PDPK1, RICTOR, SRC, GSK3B, YWHAG, YWHAZ, YWHAB, KPNA1
Domain	IPR005821	Ion_trans	0.00044262	20	88	CACNA1G, MCOLN1, CACNA1B, CACNA1C, CACNA1A, SCN8A, SCN1A, TRPC5, KCNMA1, KCNQ2, KCND2, KCNC4, KCNC3, KCNC1, KCNB1, KCNF1, KCND3, KCNA6, KCNA2, HCN3
Drug	CID000072032	P2Y	0.000448093	30	161	ADAR, ADCY1, ADARB2, ADORA1, PANX2, APC, ATP2B2, ATP2B1, P2RY12, NPY, MAPK6, MAPK1, PRKAR1A, PRKAR2A, PRKAR2B, PRKACB, PLCB4, PLCG1, SLC9A3R2, PTGS2, NEUROD6, MAP4K5, FOS, GJA1, GFAP, KCNMB4, VIP, KCNMA1, ATP2C1, PLCB1
Pathway	vegfr1_pathway	VEGFR1 specific signals	0.000448819	10	29	AKT1, CBL, MAPK1, PDPK1, PLCG1, PIK3CA, PIK3R1, GAB1, HIF1A, VEGFB
Drug	CID000003380	flunitrazepam	0.000449542	15	59	CHRM1, DBP, GABRA3, GABRA4, GABRA6, GABRA1, GABRA2, CACNG2, GABRG1, GABRG2, GABRB2, GABRB3, GABRD, GAD2, GPHN
GeneOntologyBiologicalProcess	GO:0030518	steroid hormone receptor signaling pathway	0.000454687	17	80	PMEPA1, KLF9, STRN3, PIAS1, NEDD4, MED1, THRAP3, RNF4, RNF14, GH1, SRC, NCOA2, NR3C1, UBE3A, JAK2, NCOA4, RBM9
GeneOntologyCellularComponent	GO:0000151	ubiquitin ligase complex	0.000457218	22	119	FBXO9, FBXL3, ARIH1, ANAPC1, CUL4B, CUL3, NEDD4, CDC27, UBR1, BRCC3, DCAF7, CAND1, C10orf46, OS9, WWP1, PRPF19, FBXO21, UBE2L3, CUL5, MYCBP2, LMO7, FBXW11
MousePheno	MP:0001906	increased dopamine level	0.000457782	10	24	MAOA, AQP4, OPRL1, CHRM1, POMC, COMT, LPAR1, VAV3, FOXP2, GRM2
Pathway	hsa04540	Gap junction	0.000459172	21	93	ADCY1, TUBB2B, MAP2K2, MAPK1, PRKCG, PRKACB, PDGFA, PDGFRA, PLCB4, CSNK1D, LPAR1, DRD2, GJA1, GNAQ, GNAI1, GNAI2, GUCY1B3, GUCY1A3, SRC, HTR2C, PLCB1
GeneOntologyMolecularFunction	GO:0015271	outward rectifier potassium channel activity	0.00046578	5	9	KCND2, KCNB1, KCND3, KCNA2, KCNIP2
Domain	IPR008145	Guanylt/Ca	0.00046631	8	20	MPP2, CACNB4, CACNB3, CACNB1, CACNB2, DLG1, DLG2, DLG4
GeneOntologyBiologicalProcess	GO:0051130	positive regulation of cellular component organization	0.00048059	40	266	ACHE, ACTN4, SIRPA, AKT1, MAP1B, MAPT, EIF5A2, APC, ARHGEF1, NTRK3, CBL, MAPK9, PRKCI, MAPK8, CNR1, PDPK1, PIK3R1, CAND1, DCC, DLG1, EDN3, RICTOR, DRD2, RAC1, TNKS2, SNCA, SGK1, SDC4, CDC42EP1, GH1, MGEA5, DIXDC1, SORBS1, GSK3B, HMGB1, IGF2, TPM1, SYNE1, UHMK1, LCN2
Drug	CID000005641	urethane	0.000481267	31	169	ASS1, SULT4A1, OPRL1, OPRM1, NPY, CHRM1, POMC, CSAD, DCC, EDN3, SOD2, GABRA4, GABRA6, GABRA1, GABRA2, FOS, GLRA1, GABRG1, GABRG2, GABRB2, TAC3, HCRT, SST, GRIN2A, GRINA, GRIN2C, GRIN2B, ZNF365, VIP, SYNM, CUL5
GeneOntologyBiologicalProcess	GO:0014073	response to tropane	0.000490053	8	23	CNR1, HDAC5, DLG4, DRD2, PTK2B, SNCA, HDAC2, GRM2
Drug	CID000156328	CI-1041	0.000491894	6	12	DRD2, GRM2, GRIN2A, GRINA, GRIN2C, GRIN2B
Drug	D010852	Picrotoxin	0.000491894	6	12	EDN3, GABRA1, GABRA2, GABRG2, GABRB2, GAD2
Drug	D010433	Pentylenetetrazole	0.000491894	6	12	GABRA1, GABRA2, FOS, GABRG2, GABRB2, GAD2
Drug	D002395	Catecholamines	0.000491894	6	12	MAOA, OPRM1, COMT, EDN3, TH, NR3C1
Drug	C058305	phenethyl isothiocyanate	0.000492434	26	133	MAP2, BAZ1B, XIAP, MCL1, TTC14, ATRX, BCL2L1, DST, MCOLN1, PPP1R12A, ENC1, RAP1B, PTGS2, PSMB3, EIF4G1, SLC12A2, GJA1, TMPO, TCF12, HSPB1, TXNRD1, TPR, JAK1, USP7, PWWP2A, ZC3H13
Drug	CID000092745	dihydroprogesterone	0.000493409	17	72	MBP, MAL, MOBP, RTN4, PLP1, DHX9, IMMT, GABRA4, GABRA6, GABRA1, GABRA2, TH, GABRG1, GABRG2, GABRB2, SOX10, TRPC5
Drug	CID000000547	DOPAC	0.000494586	23	112	MAOA, ASS1, AASDH, NPY, POMC, COMT, DHX9, QKI, DRD2, TPH2, SLC18A2, SLC6A4, SOD2, TH, PHIP, GAD2, GFAP, GRM2, GRIN2A, GRINA, GRIN2C, GRIN2B, SYNM
MousePheno	MP:0001462	abnormal avoidance learning behavior	0.000510139	19	66	ADCY1, NTRK2, OPRL1, SLC17A6, PAK3, CAMK2A, CACNA1B, JPH3, UBR1, RIN1, SLC6A4, GABRA1, GABBR1, FMR1, TH, GNAI1, GM2A, GRIN1, NTAN1
GeneOntologyMolecularFunction	GO:0008022	protein C-terminus binding	0.000511038	29	174	DST, CACNA1B, NCL, NEDD4, FOXN3, PRKCD, PEX6, MAPK14, PIK3R1, SLC9A3R2, SLC9A3R1, DLG1, DLG4, SLC6A4, ERCC4, ATXN1, CADM1, BAIAP2, TOP2B, TCF4, TBL1X, SRC, ARL6IP5, YWHAB, KPNA3, ANP32A, USP7, KCNIP3, ZBTB16
GeneOntologyBiologicalProcess	GO:0051051	negative regulation of transport	0.000512918	30	182	ADORA1, AKT1, MXI1, ACVR1C, PACSIN1, GOPC, NEDD4, NFKBIA, G3BP2, CNR1, PKIA, PFKL, PLCB4, EDN3, PTGS2, PTEN, DRD2, RAC1, SNCA, IL1RAPL1, GABBR1, GNAQ, GNAI2, SCAMP5, HCRT, GRB10, ARL6IP5, YWHAB, NCS1, ITGAV
Pathway	ar_tf_pathway	Regulation of Androgen receptor activity	0.000514975	14	51	ZMIZ2, MDM2, MAPK8, CREBBP, MAPK14, EHMT2, SMARCE1, MAP2K4, SRC, NCOA2, APPBP2, GSK3B, NR3C1, NR2C2
Pathway	SIG_INSULIN_RECEPTOR_PATHWAY_IN_CARDIAC_MYOCYTES	SIG_INSULIN_RECEPTOR_PATHWAY_IN_CARDIAC_MYOCYTES	0.000514975	14	51	AKT1, CBL, MAPK1, AKT3, PIK3CA, PIK3R1, PTEN, CAP1, SORBS1, GSK3B, YWHAG, YWHAZ, YWHAB, BRD4
Pathway	rapid_gr_pathway	Rapid glucocorticoid signaling	0.000518564	5	8	MAPK9, MAPK8, MAPK14, GNG2, GNB1
Pathway	PLCPATHWAY	PLCPATHWAY	0.000518564	5	8	AKT1, PLCG1, PIK3CA, PIK3R1, PLCB1
MousePheno	MP:0001402	hypoactivity	0.000524029	53	262	CACNA1G, MAOA, MAFG, ANK3, APOD, ATOX1, DNAJA3, KIF1A, NTRK2, OPRM1, CACNB4, CACNA1C, CACNA1A, JPH3, PINK1, NPY, UBR1, CNR1, CRY1, CREBBP, PLP1, PLCB4, PIGA, DBP, RORA, DLG4, QKI, LPAR1, PTEN, DRD2, PURA, SLC18A2, SLC6A4, DNAJC5, EHMT2, SNCA, PDE10A, SLC1A1, GABBR1, TH, GABRG2, FOXP2, HCRT, GRIA3, GRIN1, NR3C1, ZIC1, UGT8, UBE3A, ID2, IDS, HTR2C, RASD2
GeneOntologyBiologicalProcess	GO:0032147	activation of protein kinase activity	0.00052498	23	126	ACVR2B, ADCY1, ADORA1, DGKE, CHRM1, PRKAR1B, PRKAR1A, PRKAR2A, PRKAR2B, PRKACB, PDPK1, AGK, DGKG, DGKB, DLG1, DRD2, PTK2B, GH1, GNAI2, HCRT, MAP3K7, JAK2, IRAK1
GeneOntologyBiologicalProcess	GO:0043523	regulation of neuron apoptosis	0.00052498	23	126	CDK5R1, XIAP, BCL2L1, CACNA1A, HIPK2, EPHA7, DNAJC5, SOD2, SOD1, SNCA, SNCB, ITSN1, MAP2K4, GH1, STXBP1, GRM2, GRM4, GRIK2, GRIN1, GRIK5, NR3C1, JAK2, KCNIP3
GeneOntologyBiologicalProcess	GO:0043270	positive regulation of ion transport	0.000525483	14	60	ADCYAP1R1, ADORA1, CACNA1G, AKT1, ATP2B2, P2RY12, AKT3, PLCG1, DLG1, HOMER1, SNCA, SGK1, MGEA5, HCRT
Drug	C054649	3-(2-hydroxy-4-(1,1-dimethylheptyl)phenyl)-4-(3-hydroxypropyl)cyclohexanol	0.000527419	12	42	ACTB, AKT1, MDM2, BCL2L1, NFKBIA, POMC, MAPK1, CNR1, FOS, TH, GNA13, PPP1R1B
Pathway	P04378	Beta2 adrenergic receptor signaling	0.000531741	12	40	CACNB4, CACNB3, CACNB1, CACNB2, PRKAR2A, PRKAR2B, VAMP3, GNG12, GNG2, GNB1, VAMP2, VAMP1
Pathway	erbb1_internalization_pathway	Internalization of ErbB1	0.000531741	12	40	USP8, EPN1, CBL, VPS24, PIK3CA, PIK3R1, DNM1, ITSN1, SH3GL2, EPS15, SRC, UBE2D3
Pathway	PW:0000622	altered phosphatodylinositol 3-kinase-Akt signaling	0.000536402	4	5	AKT1, AKT3, PIK3CA, PTEN
Pathway	s1p_s1p1_pathway	S1P1 pathway	0.000537592	8	20	MAPK1, PLCG1, PTGS2, RAC1, GNAZ, GNAI1, GNAI2, ITGAV
Pathway	P05730	Endogenous cannabinoid signaling	0.000537592	8	20	CACNA1G, CACNA1B, CACNA1A, CNR1, GNG12, GNG2, GNB1, GNAI1
Pathway	IGF1MTORPATHWAY	IGF1MTORPATHWAY	0.000537592	8	20	AKT1, PDPK1, PIK3CA, PIK3R1, PTEN, EIF2S3, RPS6, GSK3B
GeneOntologyMolecularFunction	GO:0042165	neurotransmitter binding	0.000541282	21	111	ACHE, CHRNA6, CHRM1, DRD2, SLC6A13, GABRA3, GABRA4, GABRA6, GABRA1, GABRA2, GLRA1, GABRG1, GABRG2, GABRB2, GABRB3, GABRD, SSTR4, GRIN2A, GRIN1, GRIN2B, IDE
Drug	CID000002562	carbetapentane	0.000542799	8	21	ACCN2, OPRL1, CHRM1, CSAD, GRIN2A, GRINA, GRIN2C, GRIN2B
MousePheno	MP:0004994	abnormal brain wave pattern	0.000549724	14	42	CACNB4, CACNA1A, PER1, CACNA2D2, DBP, SLC2A3, SCN1A, CACNG2, GABRG2, GAD1, TEF, GRIN1, UBE3A, KCNA2
Drug	CID000003048	dieldrin	0.000557463	22	106	ADCY1, RNGTT, CLIC4, PRKCD, CLCN3, CLCN6, SLC18A2, SERINC3, SOD2, TRIM44, GABRA3, GABRA4, GABRA6, GABRA1, GABRA2, GJA1, TTYH3, GABRG1, GABRG2, GABRB2, GABRB3, GABRD
GeneOntologyBiologicalProcess	GO:0043271	negative regulation of ion transport	0.000572991	9	29	NEDD4, CNR1, PLCB4, PTGS2, IL1RAPL1, GNAQ, GNAI2, HCRT, NCS1
Drug	CID000040159	permethrin	0.000578956	19	86	TRAPPC9, ACHE, ADCY1, API5, CP, SCN3B, QKI, AGAP3, SOD2, SOD1, EXTL3, SCN1B, ABCB8, CARHSP1, FOS, GFAP, SOX10, CSDC2, KCNA2
MousePheno	MP:0002733	abnormal thermal nociception	0.000596287	24	93	ADORA1, CDK5R1, OPRL1, OPRM1, CACNA1B, CACNA1A, PRKAR1B, CNR1, CLCN6, PTGS2, NPEPPS, FXR2, TPH2, SLC6A4, GABRA4, GABBR1, FMR1, GRIA3, GRIA4, GRIK5, KCND2, KCNA6, KCNIP3, LMO7
Drug	D002762	Cholecalciferol	0.000597344	33	186	ADARB1, ARL5A, ARIH1, KLF9, BMP1, BMPR1A, PBX1, NUCKS1, PELI1, KCNAB2, CCNG2, CDKN1A, MAP2K2, CTGF, CMPK2, DAB1, PTGS2, PTEN, EPHA4, ACSL4, ZMYND11, TOB2, F3, GJA1, IMPAD1, SSR1, HSPA4, HIF1A, IGF2, IGFBP4, JAK2, SF3B1, LAMP2
GeneOntologyBiologicalProcess	GO:0009755	hormone-mediated signaling pathway	0.000598254	13	54	ADCY1, PRKAR1B, PRKAR1A, PRKAR2A, PRKAR2B, PRKACB, LANCL2, GNG12, GNG13, SGK1, GNG2, GNB1, JAK2
GeneOntologyBiologicalProcess	GO:0014070	response to organic cyclic substance	0.000601866	25	143	BCL2L1, CACNA1B, CDKN1A, CNR1, HDAC5, PCSK1, COMT, DLG4, PTCH1, PTGS2, PTEN, SRR, DRD2, PTK2B, SNCA, FNTB, FOS, LEF1, TIMP3, TF, HDAC2, GRM2, GRIN1, IGF2, HTR2C
Pathway	CARM_ERPATHWAY	CARM_ERPATHWAY	0.000611241	10	30	MEF2C, MED1, POLR2A, HDAC5, CREBBP, NCOR2, GTF2A1, HDAC2, SPEN, PELP1
MousePheno	MP:0002807	abnormal eye blink conditioning behavior	0.000614914	5	7	ACCN2, FMR1, GMFB, GFAP, KCNMA1
Drug	C015001	arsenite	0.000624285	26	135	AKT1, HSD17B7, CDKN1A, MAPK1, HS6ST2, PPP1R3C, CDK14, MAPK14, PTGS2, SELT, NAPB, SOD1, FMR1, DDIT4, HDAC2, CELF2, ARL6IP5, NR3C1, HSPA4L, HSPB1, HSPA1A, HSPA1B, HIF1A, IL1RAP, TXNRD1, PLCB1
Drug	CID000002908	cyclopiazonic acid	0.000624285	26	135	SACS, ATP2B2, ATP2B1, CAMK2D, CACNA1C, PPP1R12A, CACNB2, CACNA2D1, SEC61A1, CHRM1, PRKCI, PRKCG, PRKCD, ZFR, HOMER1, RCAN1, GJA1, GUCY1B3, GRM2, GRM3, GRM4, KCNMB4, TRPC5, HSP90B1, KCNMA1, ATP2C1
GeneOntologyCellularComponent	GO:0031901	early endosome membrane	0.000632122	11	42	EEA1, APPL1, PI4K2A, ZFYVE20, CLCN3, RAB5C, EPS15, MMGT1, CLVS1, SLC9A6, STAM2
Pathway	HCMVPATHWAY	HCMVPATHWAY	0.000637236	7	16	AKT1, MAP2K2, MAPK1, CREB1, PIK3CA, MAPK14, PIK3R1
Pathway	hsa05213	Endometrial cancer	0.000638467	14	52	AKT1, APC, ARAF, MAP2K2, MAPK1, AKT3, PDPK1, PIK3CA, PIK3R1, PTEN, LEF1, TCF7L2, APC2, GSK3B
Drug	CID000012547	5alpha-pregnane	0.00065877	15	61	ABCA1, MSN, ALAS2, GABRA3, GABRA4, GABRA6, GABRA1, GABRA2, GABRG1, GABRG2, GABRB2, GABRB3, GABRD, KCNMA1, PTP4A2
GeneOntologyMolecularFunction	GO:0005250	A-type (transient outward) potassium channel activity	0.000659882	3	3	KCND2, KCND3, KCNIP2
GeneOntologyMolecularFunction	GO:0016527	brain-specific angiogenesis inhibitor activity	0.000659882	3	3	BAI1, BAI2, BAI3
Pathway	vegfr1_2_pathway	Signaling events mediated by VEGFR1 and VEGFR2	0.000660746	16	64	AKT1, NEDD4, MAPK1, PDPK1, PLCG1, PIK3CA, PIK3R1, RAC1, PTK2B, GAB1, SRC, GRB10, HSPB1, HIF1A, VEGFB, ITGAV
GeneOntologyBiologicalProcess	GO:0007266	Rho protein signal transduction	0.000665988	26	152	ABCA1, SCAI, KALRN, ARHGAP5, RHOG, ARHGEF2, ARHGEF1, NGEF, PAFAH1B1, CDH13, ARHGAP32, PTPLAD1, COL1A2, RASGRF2, LPAR1, RICTOR, RAC1, PTK2B, ITSN1, CDC42EP1, BAIAP2, VAV3, GNA13, PLEKHG1, ARHGEF9, RHOJ
Drug	D020280	Sertraline	0.000666896	12	43	SERPINA3, MAOA, CREB1, SERPINI1, PTGS2, TPH2, SLC6A4, DNAJC5, SLC2A3, FOS, HSPA8, HTR2C
Drug	CID000005732	zolpidem	0.000666896	12	43	TWF1, SLC6A13, GABRA3, GABRA4, GABRA6, GABRA1, GABRA2, GABRG1, GABRG2, GABRB2, GABRB3, GABRD
GeneOntologyBiologicalProcess	GO:0007173	epidermal growth factor receptor signaling pathway	0.000668606	12	48	APLP2, ARF4, REPS2, CBL, CDH13, PTK2B, EPS8, EPS15, GAB1, SRC, SHC3, ERRFI1
GeneOntologyBiologicalProcess	GO:0048168	regulation of neuronal synaptic plasticity	0.000668606	12	48	CAMK2A, CPEB1, DBN1, DLG4, DRD2, SNCA, GSK3B, GRIK2, GRIN2A, GRIN1, GRIN2B, NPTN
Drug	D015735	Mifepristone	0.000670245	47	296	ACLY, ACTB, AKT1, MAP1B, MAOA, RHOG, MMP16, BCL2L1, ENC1, NFKBIA, CDH11, TIPARP, NOVA1, FOXN3, RB1CC1, MAPK8, MAPK6, MAPK1, PER1, CREBBP, MAPK14, DCN, SESN3, GPR56, RAP1B, DIO2, TRIB2, EDNRB, PTGDS, PTPRK, SOD2, SGK1, F3, FLRT2, DDIT4, TH, GJA1, SULT1A1, HDAC2, NCOA2, GSK3B, NR3C1, PTBP2, RNF146, REEP6, MMD, ARL6IP1
GeneOntologyMolecularFunction	GO:0005048	signal sequence binding	0.000672215	8	24	TNPO2, NFKBIA, SSR1, KPNA3, KPNA1, KPNB1, KCNIP2, TNPO1
MousePheno	MP:0003484	abnormal channel response	0.000675178	10	25	CACNB3, CACNA1B, CACNA1A, CACNA2D1, ARPP21, GLRA1, IL6ST, KCND2, KCNA2, KCNIP3
GeneOntologyBiologicalProcess	GO:0051966	regulation of synaptic transmission, glutamatergic	0.000679268	8	24	ADORA1, NTRK2, CNR1, PTGS2, DRD2, GRM2, GRIA4, GRIK2
GeneOntologyBiologicalProcess	GO:0033674	positive regulation of kinase activity	0.00069975	40	271	ACVR2B, ADCY1, ADORA1, AKT1, KITLG, DGKE, CHRM1, PTPLAD1, ZEB2, PRKAR1B, PRKAR1A, PRKCD, PRKAR2A, PRKAR2B, PRKACB, PDPK1, AGK, DGKG, DAB1, DGKB, DLG1, EDN3, LPAR1, DRD2, RAC1, PTK2B, SOD1, MAP2K4, MAP4K5, SDC4, CCNY, GAB1, VAV3, GH1, GNAI2, HCRT, MAP3K7, GRM4, JAK2, IRAK1
GeneOntologyMolecularFunction	GO:0004707	MAP kinase activity	0.000703518	6	14	MAPK9, MAPK8, MAPK6, MAPK1, NLK, MAPK14
MousePheno	MP:0001486	abnormal startle reflex	0.00071094	26	105	ABCA2, MID1, SLC6A5, ATP2B2, SLC17A7, DST, CACNA1B, TMOD2, PLP1, SLC12A2, DNAJC5, SLC2A3, SCN8A, GABRA3, GABRA1, FMR1, FOS, ATE1, GLRA1, CACNG2, FOXP2, GRIA3, GRIN1, GRIK5, TYROBP, PLCB1
Drug	CID000003845	kynurenic acid	0.000725033	24	122	CHRNA6, SLC6A5, SULT4A1, BCAT1, GDA, GABRA4, GABRA6, GABRA1, GABRA2, GLRA1, GABRG1, GABRG2, GABRB2, GRM2, GRM3, GRM4, GRIA3, GRIA4, GRIK2, GRIN2A, GRIK5, GRINA, GRIN2C, GRIN2B
GeneOntologyBiologicalProcess	GO:0046323	glucose import	0.000728147	11	42	AKT1, APPL1, PRKCI, PRKCD, PIK3R1, SLC1A2, SLC2A3, ARPP19, MGEA5, SORBS1, GRB10
GeneOntologyBiologicalProcess	GO:0019228	regulation of action potential in neuron	0.000736719	16	76	MBP, MAL, POU3F1, PLP1, QKI, SOD1, SCN8A, SCN1A, CLDN5, TF, GRIK2, GJC3, KCNMB4, UGT8, SBF2, KCNMA1
GeneOntologyBiologicalProcess	GO:0001964	startle response	0.000747105	7	19	DRD2, FABP7, GLRA1, GRIN2A, GRIN1, GRIN2C, GRIN2B
GeneOntologyBiologicalProcess	GO:0002053	positive regulation of mesenchymal cell proliferation	0.000755787	9	30	ARHGAP5, BMPR1A, PDGFA, FGFR1, FGFR2, SHOX2, FOXP2, HMGB1, FOXP1
Drug	CID000001935	tacrine	0.000764079	27	144	SERPINA3, ACHE, ADCY1, GMPS, MAPT, CHRNA6, SLC17A7, P4HA1, CHRM1, MAPK9, CNR1, CX3CR1, HSPH1, SLC1A2, SDC2, FUT9, GRM3, GRIA3, GRIA4, GRIN2A, GRIK5, GRINA, GRIN2C, GRIN2B, ZIC1, TTR, LPL
MousePheno	MP:0005291	abnormal glucose tolerance	0.00077397	47	229	ADCYAP1R1, ZBTB20, AKT1, ST3GAL5, PPM1L, OPRM1, PBX1, CACNA1B, CACNA1C, PNPLA2, CBL, CD38, CDKN1A, IP6K1, PRKCI, MAPK8, PRKCD, PRKAR2B, PPP1R3C, CRY1, AKT3, ATF2, CREBBP, PDK4, PDPK1, PCSK1, FEM1B, PIK3CA, PIK3R1, RICTOR, PTEN, MARK2, PTPRN, EXTL3, GAB1, RPS6, STK11, TXNIP, SLC19A2, SORBS1, GSK3B, SERP1, HMGA1, IGFBP4, IDE, HTR2C, KCNB1
Pathway	nephrin_neph1_pathway	Nephrin/Neph1 signaling in the kidney podocyte	0.000819315	10	31	AKT1, ARRB2, MAPK9, PRKCI, MAPK8, PLCG1, PIK3CA, PIK3R1, RAC1, MAP2K4
Drug	D014050	Toluene	0.000822897	21	102	ABCA1, ABCA2, POMC, SLC23A2, CREB1, SLC9A3R1, SLC22A8, SLC6A13, SLC1A2, GABRA4, GABRA1, GABRA2, FOS, GABRG2, GABRB2, GABRB3, GABRD, GFAP, GRIN2A, GRIN2B, KCNMA1
Drug	CID000009254	isoxazole	0.0008267	14	56	HDAC5, MAPK14, PTGS2, SLC18A2, SLC6A13, SLC1A1, MYEF2, GRM2, GRM3, GRIA3, GRIA4, GRIK2, GRIK5, SYNE1
GeneOntologyBiologicalProcess	GO:0051789	response to protein stimulus	0.000827271	24	138	MAP1B, BCL2L1, ERO1L, DDR1, DERL1, JKAMP, MAPK9, PCSK1, DNAJB6, VAPB, FGFR2, HSPH1, DNAJB4, FOS, NR3C1, HSPA4L, HSPB1, HSPA8, SERP1, HSPA1A, HSPA4, HSPA1B, ID2, TTC3
MousePheno	MP:0001436	abnormal suckling behavior	0.000828786	26	106	ARAF, UBR3, ATRX, NTRK2, BMPR1A, OGT, BCL11B, MAPK6, CNTFR, PIGA, DCC, DNM1, LPAR1, FOXG1, FUS, FKBP8, GJA1, GNB1, GAD1, GPHN, SYT1, GRIN1, GRIN2B, ZIC1, KIF2A, JAK1
Drug	CID000002548	Neurotoxic	0.000836845	47	299	ACHE, ACTB, ADORA1, CACNA1G, ANK3, OPRL1, OPRM1, CACNB4, CACNB3, CACNA1B, CACNA1C, CACNA1A, CACNB1, CACNB2, CACNA2D1, NPY, CHRM1, POMC, MAPK9, PRKCI, MAPK8, CNR1, PRKCG, PRKCD, KLF6, PIK3C2A, PIK3CA, PIK3R1, CACNA2D2, PTGS2, SLC18A2, SLC6A4, ABCB8, FOS, TH, CACNG2, GFAP, TAC3, SST, GRIN2A, GRINA, GRIN2C, GRIN2B, VIP, TRPC5, LIMS1, CACNG4
Pathway	P04373	5HT1 type receptor mediated signaling	0.000865591	12	42	PRKAR2A, PRKAR2B, VAMP3, GNG12, SLC18A2, SLC6A4, GNG2, GNB1, GNAI1, GNAI2, VAMP2, VAMP1
Pathway	hsa04310	Wnt signaling pathway	0.000870616	29	152	APC, CAMK2D, CAMK2A, MAPK9, MAPK8, PRKCG, PRKACB, PPP2R5C, PPP2R5E, PPP3R1, PPP3CB, NLK, CREBBP, PLCB4, CSNK2A1, TBL1XR1, RAC1, SENP2, CHP, FZD2, LEF1, TCF7L2, APC2, TBL1X, MAP3K7, GSK3B, WNT8B, PLCB1, FBXW11
GeneOntologyBiologicalProcess	GO:0014051	gamma-aminobutyric acid secretion	0.000870997	5	10	APBA1, CACNB4, CACNA1A, GABBR1, HTR2C
GeneOntologyBiologicalProcess	GO:0060123	regulation of growth hormone secretion	0.000870997	5	10	CHD7, DRD2, GABBR1, MGEA5, SERP1
MousePheno	MP:0003460	decreased fear-related response	0.000871391	11	30	ADCY1, MAP2, GIT1, PTCH1, FXR2, GABRA1, GABBR1, FMR1, GM2A, GRIK2, TRPC5
Drug	D008942	Mitoxantrone	0.000875641	33	190	ABCA1, TMEM47, ADARB1, MXI1, MDM2, XIAP, ASS1, P4HA1, PBX1, KCNAB2, ENC1, PPP1R2, PLCB4, EPB41L2, AHCYL1, SCD, SDC2, FZD2, KRR1, DDIT4, TPD52, GUCY1B3, RRAGD, CELF2, SORBS1, NR3C1, BTBD3, TPM1, SLC7A5, SATB2, TRIM2, MYCBP2, EVI5
Pathway	hsa04916	Melanogenesis	0.000875942	22	104	ADCY1, KITLG, CAMK2D, CAMK2A, POMC, MAP2K2, MAPK1, PRKCG, PRKACB, CREB1, CREBBP, PLCB4, EDNRB, FZD2, LEF1, GNAQ, GNAI1, GNAI2, TCF7L2, GSK3B, WNT8B, PLCB1
GeneOntologyBiologicalProcess	GO:0007015	actin filament organization	0.000882347	27	163	ACTN4, SIRPA, ADD1, SHROOM2, ARHGEF2, CALD1, GAS7, TMOD3, PRKCI, ARPC3, ARPC1B, RDX, DBN1, DLG1, RICTOR, RAC1, RHOF, PTK2B, FSCN1, WASF3, SDC4, CIT, SORBS1, SPTBN1, GSN, TPM1, ERMN
GeneFamily	KLF	Kruppel-like factors	0.000906317	5	17	KLF9, KLF7, KLF13, KLF6, KLF12
GeneOntologyBiologicalProcess	GO:0051896	regulation of protein kinase B signaling cascade	0.000923173	8	25	RICTOR, PTEN, DRD2, ITSN1, F3, TCF7L2, STK11, IGF2
GeneOntologyBiologicalProcess	GO:0016601	Rac protein signal transduction	0.000923173	8	25	RHOG, CDH13, PTPLAD1, ELMO1, CRK, RICTOR, NISCH, RHOU
GeneOntologyBiologicalProcess	GO:0001701	in utero embryonic development	0.000934509	40	275	ADAM10, ADD1, AKT1, AMD1, MAFG, APBA1, ACVR1C, UBR3, BCL2L1, BMPR1A, CUL3, MED1, KEAP1, ARNT2, MAPK1, PDGFRA, COL4A3BP, DNAJB6, CHD7, PLCG1, ANKRD11, HS6ST1, NCOR2, FGFR1, FGFR2, SFRS1, GAB1, PITPNB, LEF1, GJA1, HBA2, GNA13, SOX10, SPINT1, GRIN2B, PRPF19, HIF1A, UBE2B, TPM1, ZFAND5
MousePheno	MP:0008026	abnormal brain white matter morphology	0.000941459	32	141	CDK5R1, MAP1B, MAP2, DCLK1, ARHGAP5, CACNB3, ATRN, MARCH7, NFIB, NFIA, NFIX, KLF7, AKT3, PDHA1, DNM1L, PLP1, DCC, QKI, EPHA4, RAC1, PURA, FGFR1, FGFR2, FOXG1, MAP2K4, GFAP, ATCAY, NDST1, KLC1, SUZ12, KIF1B, MYCBP2
Drug	C020806	tetrabromobisphenol A	0.000945547	15	63	STRN3, WDR33, MAPK9, MAPK8, MAPK1, WDR1, DNM1L, MAPK14, VAMP3, TBPL1, TMPO, SULT1A1, TTR, USP7, METAP1
Drug	CID005460560	arsinic acid	0.000950664	3	3	SRC, MMD, PDS5B
Drug	C022871	isoborneol	0.000950664	3	3	GABRA1, GABRG2, GABRB2
Drug	C021604	CL 218872	0.000950664	3	3	GABRA1, GABRG2, GABRB3
Drug	C098980	aplidine	0.000950664	3	3	AKT1, MAPK8, RAC1
Drug	DB00042	Botulinum Toxin Type B	0.000950664	3	3	VAMP2, VAMP1, SYT2
GeneOntologyBiologicalProcess	GO:0048813	dendrite morphogenesis	0.000965651	10	37	ACHE, DCLK1, CACNA1A, KLF7, CELSR2, SGK1, CIT, GSK3B, GRIN1, SYNE1
Drug	CID000004680	papaverine	0.000974695	31	176	ADCY1, ADORA1, CACNA1G, DST, CACNB4, CACNB3, CACNA1B, CACNA1C, CACNA1A, CACNB1, CACNB2, CACNA2D1, CREB1, PDE1A, PDE2A, PDE4A, POLR3E, PLCB4, PLCG1, CACNA2D2, PTGS2, PDE10A, CACNG2, TRNT1, GUCY1B3, HBA2, SSB, VIP, CACNG4, PLCB1, CYGB
Pathway	ST_ADRENERGIC	ST_ADRENERGIC	0.000981492	11	37	AKT1, APC, MAPK1, PIK3CA, MAPK14, PIK3R1, GNAQ, GNAI1, SRC, KCNJ9, ITPKA
Drug	D005473	Fluoxetine	0.00100593	11	39	SERPINA3, NTRK2, CREB1, SERPINI1, DAB1, TPH2, SLC2A3, GJA1, GAD2, GSK3B, NR3C1
GeneOntologyBiologicalProcess	GO:0033043	regulation of organelle organization	0.00101836	42	294	ADD1, MAP1B, MAP1A, MAP2, MAPT, APC, SHROOM2, MID1, ARHGEF2, MLL, DST, TMOD3, GOLPH3, MAPK8, PDGFA, ARPC3, ARPC1B, RDX, DLG1, EDN3, RICTOR, RAC1, TNKS2, SNCA, ERCC4, SGK1, SDC4, CIT, DYNC1LI1, TACC1, SPTBN1, GSN, NEBL, GRIK5, HMGA1, IGF2, UBE2B, TPM1, TPR, CLASP1, MYCBP2, CLASP2
GeneOntologyMolecularFunction	GO:0019208	phosphatase regulator activity	0.00101884	13	57	ZEB2, PPP2R5C, PPP2R4, PPP2R5E, PPP1R2, CSNK2A1, PTN, TESC, PHACTR3, SBF2, SHOC2, PPP1R1B, ANP32E
MousePheno	MP:0000854	abnormal cerebellum development	0.00102036	27	113	CDK5R2, CDK5R1, MAP1B, MDM2, DCLK1, MID1, NTRK2, CACNA1A, NEUROD1, NFIB, NFIA, CRKL, CRK, DNM1L, PLCB4, DAB1, RORA, PTCH1, PTEN, PURA, FGFR1, SCN8A, GJA1, FOXP2, ZIC1, TXNRD1, INPP4A
MousePheno	MP:0001501	abnormal sleep pattern	0.00102279	12	35	CACNA1G, MAOA, CACNA1B, PER1, TPH2, SLC6A4, GABBR1, FOS, DLGAP3, HCRT, UBE3A, KCNA2
Pathway	P00049	Parkinson disease	0.00102504	18	79	MAPK9, MAPK8, MAPK1, MAPK14, CSNK2A1, CSNK1D, PSMB3, SNCA, SNCB, TH, HSPA8, HSPA9, HSPA1A, HSPA1B, YWHAB, UBE2L3, UBE2G2, FBXW11
Drug	C009131	pyrimidin-2-one beta-ribofuranoside	0.00103018	9	28	MAP1A, BCL2L1, NFIC, DERL1, RABGAP1L, CREB1, RRM2B, WDR47, PHLDB1
MousePheno	MP:0000890	thin cerebellar molecular layer	0.00103774	9	22	ANK3, ATP2B2, CACNA1A, CRKL, CRK, RORA, FOXP2, GRIN2C, KLHL1
Drug	D007854	Lead	0.00103933	12	45	ACHE, NTRK3, CBL, PRKCI, MAPK1, PRKCG, PDGFRA, EDN3, SOD2, SOD1, NR3C1, HSPA8
Drug	CID000004943	propofol	0.00105328	33	192	TRAPPC9, ACCN2, CHRNA6, CACNA2D1, NBL1, CHRM1, POMC, ARNT2, PIK3C2A, SCN3B, SLC6A4, SOD2, SLC1A1, SCN1B, ABCB8, IL1RAPL1, GABRA3, GABRA4, GABRA6, GABRA1, GABRA2, GLRA1, GABRG1, GABRG2, GABRB2, GABRB3, GABRD, GRIN2A, GRINA, GRIN2C, GRIN2B, HIF1A, IL1RAP
GeneOntologyMolecularFunction	GO:0005246	calcium channel regulator activity	0.00105358	7	20	CACNB2, NPY, NRXN2, NRXN1, STX1A, GRM2, GRM3
MousePheno	MP:0001951	abnormal breathing	0.0010751	50	251	ABCA1, AKT1, MEF2C, NTRK2, BMPR1A, NFIB, KLF7, LIN7C, CDKN1A, MAPK9, MAPK8, MAPK6, DCN, DCC, NRXN2, NRXN1, DLG1, EDNRB, PTGS2, DRD2, TPH2, PRDM16, FGFR3, MAN1A2, FOXG1, SLC5A3, SCN8A, FKBP8, GLRA1, TIMP3, GJA1, IMPAD1, GNAQ, GNAI2, B4GALNT1, GAD1, GPHN, FOXP2, RAB3C, SRC, GRIN1, NR3C1, HIF1A, TRPS1, NDST1, KIF5A, KCNA2, PDS5B, MYCBP2, ZFAND5
Drug	CID000001388	1-methyl-4-phenyl-1,2,3,6-tetrahydropyridine	0.00107582	29	162	MAOA, CHRNA6, OGDH, CDC27, COMT, DRD2, RIN1, PTPRD, SLC18A2, SOD2, SOD1, SNCA, SNCB, FOS, TH, TMPO, GAD2, GAD1, GFAP, GRM2, GRM3, GRM4, HYOU1, GRIN2A, GRINA, GRIN2C, GRIN2B, HSPA4L, PPP1R1B
GeneOntologyBiologicalProcess	GO:0051924	regulation of calcium ion transport	0.00108211	17	86	ADCYAP1R1, CACNA1G, ATP2B2, CACNB4, CACNA2D1, JPH3, PLCG1, HOMER1, PTGS2, SLC8A1, SNCA, IL1RAPL1, GJA1, GNAI2, MGEA5, HCRT, NCS1
Pathway	h_biopeptidesPathway	Bioactive Peptide Induced Signaling	0.00108223	10	32	MAPT, MAP2K2, MAPK8, MAPK1, PLCG1, MAPK14, PTK2B, GNB1, GNAI1, JAK2
GeneOntologyMolecularFunction	GO:0022829	wide pore channel activity	0.00108648	6	15	PANX2, AQP4, GJC2, GJB1, GJA1, GJC3
Drug	C034786	bis(4-hydroxycinnamoyl)methane	0.00109363	8	23	AKT1, MGAT3, NFKBIA, KEAP1, MAPK1, PRKCD, PTGS2, TIMP2
GeneOntologyCellularComponent	GO:0030315	T-tubule	0.00110405	8	26	CAMK2D, CACNA1C, CACNB1, CACNA2D1, PRKAR2A, DLG1, SLC8A1, SCN1A
GeneOntologyBiologicalProcess	GO:0051047	positive regulation of secretion	0.00111344	25	149	ACHE, ADORA1, CACNA1G, CACNA1B, RTN4, CD38, PINK1, MAPK9, CREB1, PCSK1, EDN3, DRD2, SNCA, GABBR1, CADM1, SCAMP5, TCF7L2, STX1A, MGEA5, SRC, GRIN2B, SERP1, HTR2C, JAK2, NCS1
GeneOntologyBiologicalProcess	GO:0006470	protein amino acid dephosphorylation	0.00111344	25	149	RNGTT, ADORA1, PPM1L, MTMR6, PPP1R12A, PTPN23, PPM1B, PPM1K, PPP2R4, PPP3R1, PPP3CB, PTEN, DUSP8, PTPN3, PTPRD, PTPRN, PTPRK, PTPRS, SSH1, PDP1, DUSP14, DUSP19, YWHAB, PTP4A2, NCEH1
GeneOntologyBiologicalProcess	GO:0048545	response to steroid hormone stimulus	0.00112557	34	225	ABCA2, MAP1B, ASS1, STRN3, C1QB, CACNA1B, CD38, CDKN1A, ARNT2, MAPK1, PDGFA, PDGFRA, PCSK1, PIK3R1, PTCH1, PTGS2, PTEN, RCAN1, RNF14, PTPRN, SGK1, FOS, TH, TIMP3, GH1, MGEA5, SULT1A1, SLC25A36, TXNIP, TBL1X, SRC, SST, HMGB1, KCNMA1
MousePheno	MP:0005292	improved glucose tolerance	0.00112866	22	86	ZBTB20, ST3GAL5, PPM1L, OPRM1, CACNA1B, PNPLA2, CBL, MAPK8, PRKAR2B, ATF2, CREBBP, PDK4, PDPK1, PIK3R1, RICTOR, MARK2, GAB1, STK11, TXNIP, SORBS1, GSK3B, KCNB1
Pathway	GLEEVECPATHWAY	GLEEVECPATHWAY	0.00112935	8	22	AKT1, MAPK8, CRKL, PIK3CA, PIK3R1, MAP2K4, FOS, JAK2
Pathway	AGPCRPATHWAY	AGPCRPATHWAY	0.00113017	6	13	PRKAR1B, PRKAR1A, PRKAR2A, PRKAR2B, PRKACB, GNB1
Drug	CID000002351	bepridil	0.00116416	24	126	CALN1, ACCN2, CACNA1G, APLP2, ATP2B2, ATP2B1, CACNB4, CACNB3, CACNA1B, CACNA1C, CACNA1A, CACNB1, CACNB2, CACNA2D1, KRIT1, CHRM1, SCN3B, CACNA2D2, SCN1B, ABCB8, CACNG2, CACNG3, KCND3, CACNG4
GeneOntologyCellularComponent	GO:0019897	extrinsic to plasma membrane	0.00116802	15	73	EEA1, DLG4, GNG12, GNG13, RAC1, GNG2, GNAQ, GNAZ, GNB1, GNAI1, GPHN, APC2, GNA13, JUP, ERRFI1
Drug	CID000108161	4'-iodo-4'-deoxydoxorubicin	0.00118811	10	34	ATP6V0A1, DMWD, RAB2A, PTPRN, SFRS2, IDS, TTR, SYNE1, MMD, DDN
Drug	DB00132	Alpha-Linolenic Acid	0.00118957	4	6	FADS2, SLC8A1, FABP7, ELOVL4
Drug	D009118	Muscimol	0.00118957	4	6	POMC, GABRA1, GABRB2, GABRB3
Drug	DB00653	Magnesium Sulfate	0.00118957	4	6	CACNA1C, CACNB1, CACNB2, CACNA2D1
Drug	D010743	Phospholipids	0.00118957	4	6	ABCA1, AKT1, SLC2A1, GSK3B
Drug	D010672	Phenytoin	0.00118975	23	119	ABCA1, ACHE, MAP1B, BMP1, PAFAH1B2, PAFAH1B1, NFKBIA, POU3F1, CDKN1A, MAPK1, PLTP, PIP4K2A, PTCH1, FGFR2, SCN1A, SDC4, FLRT2, FOS, GH1, SULT1A1, NR3C1, VEGFB, IGF2
Drug	CID000003592	heroin	0.00119739	19	91	RNGTT, RGMB, OPRL1, OPRM1, DNM3, CHRM1, PNN, CNR1, PRKCG, DNM1L, COMT, DNM1, DRD2, TPH2, PTPRN, F3, FOS, GAD2, GAD1
GeneOntologyBiologicalProcess	GO:0006970	response to osmotic stress	0.00120937	10	38	MAPK8, PDPK1, TSC22D3, RAC1, PTK2B, SLC12A2, SLC2A1, SST, KCNMA1, CUL5
Drug	CID000003355	flecainide	0.00122314	16	71	SERPINA3, ACCN2, ARIH1, CACNB2, CACNA2D1, PEX6, SCN3B, DPP6, SCN1B, ABCB8, KCND2, KCNC1, KCND3, KCNA6, KCNA2, KCNIP2
Drug	CID000005514	topiramate	0.00122314	16	71	ACCN2, CACNA2D1, NPY, SCN3B, PTCH1, SCN1B, ABCB8, GABRA1, GRM2, GRM3, GRIA4, GRIN2A, GRIK5, GRINA, GRIN2C, GRIN2B
MousePheno	MP:0008840	abnormal spike wave discharge	0.00122539	6	11	CACNA1G, CACNA1A, PTEN, SCN8A, SCN1A, UBE3A
GeneOntologyBiologicalProcess	GO:0010675	regulation of cellular carbohydrate metabolic process	0.00122751	13	58	ADCYAP1R1, AKT1, PPP1R3C, SNCA, ARPP19, TCF7L2, STK11, MGEA5, SORBS1, SRC, NR3C1, HMGB1, HIF1A
GeneOntologyBiologicalProcess	GO:0042133	neurotransmitter metabolic process	0.00123248	8	26	ACHE, MAOA, CACNA1A, COMT, TH, GAD2, GAD1, AGTPBP1
GeneOntologyBiologicalProcess	GO:0051247	positive regulation of protein metabolic process	0.00123602	40	279	ADORA1, AKT1, MAP1B, MAPT, EIF5A2, MDM2, APC, KITLG, SH3D19, BMPR1A, PELI1, PIAS1, NEDD4, NFKBIA, RB1CC1, MAPK9, MAPK8, MAPK1, PPP2R4, CTGF, CSNK1D, DLG1, EDNRB, RICTOR, DRD2, RAC1, PTK2B, FGFR3, SNCA, MAP2K4, GJA1, GH1, TCF7L2, MGEA5, HDAC2, SERP1, HMGB1, IL6ST, JAK2, UHMK1
Pathway	ret_pathway	Signaling events regulated by Ret tyrosine kinase	0.00125367	11	38	MAPK8, MAPK1, CRK, CREB1, PIK3CA, PIK3R1, RAC1, GAB1, GFRA1, SRC, GRB10
Drug	CID000007045	quinoxaline	0.00125487	13	52	RGMB, TIPARP, F3, PHIP, GRM3, SST, GRIA3, GRIA4, GRIN2A, GRIK5, GRINA, GRIN2C, GRIN2B
Drug	CID000002170	amoxapine	0.00128214	12	46	MAOA, SLC6A5, SLC17A7, SLC17A6, DRD2, SLC18A2, SLC6A13, SLC6A4, SLC1A1, SLC1A2, CYB5B, HTR2C
Drug	C475587	olomoucine II	0.00134437	6	14	AKT1, MDM2, CDKN1A, MAPK1, MAPK14, CSNK2A1
Drug	D015632	1-Methyl-4-phenyl-1,2,3,6-tetrahydropyridine	0.00134437	6	14	SLC18A2, SNCA, TH, GAD2, GAD1, GFAP
Drug	D008874	Midazolam	0.00134437	6	14	GABRA4, GABRA2, GABRG2, GABRB3, GABRD, GRIN2A
Drug	D014241	Trichloroethylene	0.00134438	18	85	MTPN, MDM2, ACVR1C, BCL2L1, RTN4, CCNG1, NR1D2, CSNK2A1, SLC9A3R1, PTGDS, PTEN, PTMS, PTPRN, CHP, GTPBP4, TXNIP, NR3C1, ID2
GeneOntologyBiologicalProcess	GO:0006584	catecholamine metabolic process	0.00135439	11	45	MAOA, MTPN, ATF2, COMT, DRD2, SNCA, SNCB, TH, SULT1A1, GRIN2A, HTR2C
MousePheno	MP:0004859	abnormal synaptic plasticity	0.00135597	12	36	ADCY1, NTRK2, NRGN, CAMK2A, CLCN3, CPLX2, FOXP2, GRIA3, GRIN1, GRIN2B, PIP5K1C, ARHGEF9
MousePheno	MP:0000951	sporadic seizures	0.00136531	10	27	GJC2, KCNAB2, CAMK2A, NEUROD2, NPY, SLC2A1, GABBR1, GJB1, HTR2C, KIF5A
Drug	C459604	candoxin	0.00138335	20	99	ASS1, KLF9, CCNG2, CLIC4, DNAJB6, PLTP, CSAD, GPR56, PTGS2, SNCA, GABRA2, RPS21, TIMP3, TPD52, DDX17, HSPA1A, IGFBP4, UBE2D3, TPM1, LPL
GeneOntologyBiologicalProcess	GO:0006916	anti-apoptosis	0.00138379	37	254	AKT1, MEF2C, XIAP, MCL1, OPA1, BCL2L1, API5, RTN4, NFKBIA, CDH13, CDKN1A, PRKCI, HIPK3, PIK3CA, PIK3R1, TSC22D3, PTK2B, SOD2, SON, SOD1, SNCA, F3, SGK3, GNAQ, TCF7L2, GSK3B, NR3C1, HSPB1, HSPA9, HSPA1B, YWHAZ, HMGB1, IL6ST, HSP90B1, IRAK1, TXNDC5, MKL1
Pathway	pdgfrbpathway	PDGFR-beta signaling pathway	0.00141262	14	56	AKT1, CBL, PRKCD, PLCG1, PIK3CA, PIK3R1, SLC9A3R2, SLC9A3R1, PTEN, RAC1, GAB1, SRC, GRB10, HIF1A
Drug	C066075	vanadium pentoxide	0.00143164	16	72	CCNT2, CCNG2, KLF7, KEAP1, MAPK1, COL1A2, PDGFA, PDGFRA, CTGF, CX3CR1, EGR3, SOD2, SLC2A3, OXR1, JAK2, JAK1
Drug	CID000003686	idebenone	0.00143167	14	59	ACO2, APBA1, CACNA1A, MAP2K2, MAPK9, MAPK8, PDHA1, ATN1, SOD2, SOD1, MAP2K4, GRIN1, UBE2K, IDE
GeneOntologyBiologicalProcess	GO:0032355	response to estradiol stimulus	0.00145077	13	59	MAP1B, STRN3, CD38, ARNT2, PDGFA, PDGFRA, PTCH1, PTGS2, PTEN, RNF14, GH1, SLC25A36, TXNIP
Pathway	PW:0000674		0.00147098	7	18	SYT7, CACNA1C, CACNA1A, STXBP1, STX1A, VAMP2, KCNB1
Pathway	CCR5PATHWAY	CCR5PATHWAY	0.00147098	7	18	MAPK8, PLCG1, MAPK14, PTK2B, FOS, GNAQ, SYT1
GeneOntologyMolecularFunction	GO:0005313	L-glutamate transmembrane transporter activity	0.00147187	5	11	SLC17A6, SLC25A12, SLC1A6, SLC1A1, SLC1A2
MousePheno	MP:0000878	abnormal Purkinje cell number	0.00147694	17	61	ANK3, ATP2B2, NEUROD1, PI4K2A, ATF2, PDHA1, DNM1L, CACNA2D2, RORA, PTEN, PURA, SCN8A, ATXN1, FMR1, B4GALNT1, TRIM2, AGTPBP1
Pathway	P00018	EGF receptor signaling	0.00147866	22	108	AKT1, ARAF, CBL, MAP2K2, MAPK9, PRKCI, MAPK8, MAPK1, PRKCG, PRKCD, PPP2R5C, PPP2R5E, AKT3, PLCG1, PIK3C2A, PIK3CA, MAPK14, RAC1, MAP2K4, GAB1, YWHAB, SHC3
GeneOntologyBiologicalProcess	GO:0043410	positive regulation of MAPKKK cascade	0.00148174	18	96	ARRB2, PRKCD, TAOK3, DCC, HIPK2, LPAR1, DRD2, FGFR1, FGFR3, FGFR2, GAB1, TIMP2, MAP3K7, DIXDC1, SRC, GRM4, IGF2, ITGAV
GeneOntologyBiologicalProcess	GO:0060004	reflex	0.00148236	5	11	CACNA1A, GLRA1, FOXP2, KCNMA1, NR4A3
Pathway	hsa05220	Chronic myeloid leukemia	0.00148865	17	75	AKT1, MDM2, ARAF, ACVR1C, BCL2L1, CBL, NFKBIA, CDKN1A, MAP2K2, MAPK1, CRKL, CRK, AKT3, PIK3CA, PIK3R1, HDAC2, SHC3
MousePheno	MP:0004996	abnormal CNS synapse formation	0.00151084	9	23	KALRN, CHRM1, DNM1L, NRXN2, NRXN1, DTNA, PURA, FOXG1, CACNG2
Drug	D004298	Dopamine	0.00151863	10	35	MAOA, MAPT, CHRNA6, CREB1, DRD2, SLC18A2, SNCA, FOS, TH, SULT1A1
GeneOntologyCellularComponent	GO:0042382	paraspeckles	0.00152831	4	7	CPSF6, NUDT21, PSPC1, NEAT1
Drug	C095284	1H-(1,2,4)oxadiazolo(4,3-a)quinoxalin-1-one	0.0015292	7	19	MDM2, XIAP, CDKN1A, CREB1, GUCY1B3, GUCY1A3, HIF1A
GeneOntologyBiologicalProcess	GO:0006979	response to oxidative stress	0.00153161	31	203	MT3, ATOX1, BCL2L1, IPCEF1, ATRN, CD38, MAPK8, PRKCD, SLC23A2, PTGS2, MARK2, PTPRN, PTPRK, PTK2B, SLC8A1, SOD2, SOD1, SNCA, ETV5, RRM2B, GAB1, FOS, TXNIP, OXR1, HIF1A, TXNRD1, TPM1, JAK2, NPTXR, LCN2, CYGB
Pathway	P00035	Interferon-gamma signaling	0.00153241	9	28	PIAS1, MAPK9, MAPK8, MAPK1, MAPK14, SOCS6, IFNGR2, JAK2, JAK1
Pathway	nectin_pathway	Nectin adhesion pathway	0.00153241	9	28	PVRL3, CRK, PIK3CA, PIK3R1, RAP1B, RAC1, SRC, PIP5K1C, ITGAV
Pathway	ST_GRANULE_CELL_SURVIVAL_PATHWAY	ST_GRANULE_CELL_SURVIVAL_PATHWAY	0.00153241	9	28	APC, MAPK9, MAPK8, MAPK1, CREB1, MAP2K4, FOS, GNAQ, ITPKA
GeneOntologyBiologicalProcess	GO:0030334	regulation of cell migration	0.00155579	35	238	ADAM10, ADORA1, AKT1, SCAI, APC, ARHGAP5, RTN4, CDH13, CLIC4, MAPK8, MAPK1, HDAC5, PDGFA, PDGFRA, PLCG1, PIK3R1, EDN3, PTEN, DRD2, RAC1, PTPRK, PTK2B, F3, NISCH, GTPBP4, GAB1, RAPGEF4, GNA13, SRC, SST, HMGB1, HIF1A, IL6ST, TPM1, JAK2
Drug	CID000000138	5-aminovaleric acid	0.00157001	12	47	ADORA1, CPD, CYLD, AHCYL1, GABRA4, GABRA6, GABRA1, GABRA2, GABBR1, GABRG1, GABRG2, GABRB2
GeneFamily	GJ	Gap junction proteins (connexins)	0.00157462	5	19	GJC2, GJC1, GJB1, GJA1, GJC3
Pathway	mtor_v2pathway	mTOR signaling pathway	0.00157573	16	69	AKT1, RB1CC1, MAP2K2, MAPK1, PDPK1, RICTOR, RAC1, EIF4A1, EIF4B, SGK1, DDIT4, RRAGD, YWHAG, YWHAZ, YWHAB, FBXW11
GeneOntologyMolecularFunction	GO:0031420	alkali metal ion binding	0.00160573	34	230	ACCN2, ATP1B2, SLC17A7, SLC17A6, KCNAB2, SLC4A4, SLC23A2, SCN3B, KCNIP4, SLC12A2, SLC8A1, SLC5A3, SCN8A, SCN1A, SCN1B, SLC9A6, BPNT1, KCNMA1, KCNQ2, KCNJ9, KCND2, KCNC4, KCNC3, KCNC1, KCNB1, KCNF1, KCND3, KCNA6, KCNA2, HCN3, KCNIP2, KCNIP3, KCNAB1, SLC12A5
GeneOntologyBiologicalProcess	GO:0042417	dopamine metabolic process	0.00161895	8	27	MAOA, COMT, DRD2, SNCA, SNCB, TH, GRIN2A, HTR2C
GeneOntologyMolecularFunction	GO:0031701	angiotensin receptor binding	0.00161911	4	7	ARRB2, EDNRB, GNB1, GNA13
GeneOntologyMolecularFunction	GO:0016566	specific transcriptional repressor activity	0.0016214	11	46	HDAC5, NKRF, NCOR2, PURB, TCF7L2, FOXP2, HDAC2, NACC2, KCNIP3, FOXP1, ZBTB16
GeneOntologyBiologicalProcess	GO:0043576	regulation of respiratory gaseous exchange	0.0016242	6	16	ADORA1, SLC5A3, GLRA1, GRIN1, NLGN1, NLGN2
GeneOntologyBiologicalProcess	GO:0051590	positive regulation of neurotransmitter transport	0.0016242	6	16	CACNA1B, DRD2, SNCA, STX1A, GRIN2B, HTR2C
GeneOntologyBiologicalProcess	GO:0042428	serotonin metabolic process	0.00162872	4	7	MAOA, ATP2B2, TPH2, GRIN2A
GeneOntologyBiologicalProcess	GO:0006924	activation-induced cell death of T cells	0.00162872	4	7	AKT1, DNAJA3, RPS6, GPAM
GeneOntologyBiologicalProcess	GO:0006820	anion transport	0.00163383	25	153	OCA2, SLC17A7, SLC4A4, SLC25A12, CLIC4, PRKCD, CLCN3, CLCN6, SLC22A8, SLC12A2, SLC4A3, SLC1A6, SLC1A1, SLC1A2, GABRA3, GABRA4, GABRA6, GABRA1, GABRA2, GLRA1, GABRG1, GABRG2, SFXN5, ARL6IP5, SLC12A5
GeneOntologyBiologicalProcess	GO:0043408	regulation of MAPKKK cascade	0.00163383	25	153	AKT1, APC, ARRB2, MAPK9, PRKCD, TAOK3, DCC, HIPK2, LPAR1, DRD2, PTK2B, FGFR1, FGFR3, FGFR2, MAP2K4, GAB1, TIMP2, MAP3K7, DIXDC1, SRC, GRM4, GRIK2, GRIN2B, IGF2, ITGAV
Drug	CID000063062	hydroxytamoxifen	0.00164125	33	197	AKT1, ARAF, MMP15, OPA1, KRIT1, NFIC, CDH13, MED1, PRKCI, PKIA, PRKCG, PRKCD, ETNK1, CPM, ATF2, PIK3R1, SOCS6, VAMP3, SLC9A3R1, HIPK2, NCOR2, FOS, FOXP2, SULT1A1, NCOA2, DDX17, NR3C1, HMGA1, IGFBP4, EMB, CBX5, MIER1, LASP1
GeneOntologyBiologicalProcess	GO:0007422	peripheral nervous system development	0.00164188	11	46	BAI1, BAI2, POU3F1, SERPINI1, EDNRB, EGR3, SOD1, SLC5A3, SCN8A, SOX10, UGT8
GeneOntologyBiologicalProcess	GO:0018209	peptidyl-serine modification	0.00166668	14	67	AKT1, PINK1, SPOCK2, MAPK1, NLK, AKT3, HIPK3, DCN, SGK1, SBK1, GALNT1, GSK3B, TTBK2, UHMK1
Pathway	163685	Energy Metabolism	0.00168013	12	45	ACLY, ADCY1, PRKAR1B, PRKAR1A, PRKAR2A, PRKAR2B, PRKACB, GNG12, GNG13, GNG2, GNB1, STK11
GeneOntologyMolecularFunction	GO:0046982	protein heterodimerization activity	0.00168089	39	275	PRMT8, ADD1, ADORA1, MAX, PANX2, UBA3, MCL1, BCL2L1, PBX1, NEUROD1, ARNT2, CLCN3, PPP2R4, PPP3CB, ATF2, PDGFA, PDGFRA, VAPB, DLG2, RIMS2, FOS, RALGAPA1, FOXP4, TPD52, TOP2B, TCF4, STX1A, GUCY1B3, GUCY1A3, FOXP2, GTF2A1, RRAGD, GRIN2B, NR3C1, HIF1A, VEGFB, KCND2, IRAK1, FOXP1
GeneOntologyBiologicalProcess	GO:0009746	response to hexose stimulus	0.0017067	13	60	ACVR2B, ACVR1C, NEUROD1, PFKL, PCSK1, PTGS2, PTEN, PTPRN, PTK2B, SLC8A1, TCF7L2, TXNIP, GPAM
GeneOntologyBiologicalProcess	GO:0007613	memory	0.0017067	13	60	ACCN2, ADCY1, CNR1, PTGS2, PTEN, DRD2, SGK1, TH, GRIN2A, GRIN1, GRIN2B, NTAN1, PLCB1
GeneOntologyCellularComponent	GO:0044448	cell cortex part	0.00172411	17	91	ACTB, ACTN4, SHROOM2, CALD1, EXOC4, PRKCI, LANCL2, DLG4, EPB41L2, MARK2, CAP1, TMOD1, GM2A, SPTBN1, CLASP1, LASP1, EXOC6B
GeneOntologyCellularComponent	GO:0008287	protein serine/threonine phosphatase complex	0.00172827	11	47	PPM1L, STRN3, PPM1B, PPM1K, PPP2R5C, PPP2R4, PPP2R5E, PPP3R1, PPP3CB, PDP1, SHOC2
GeneOntologyBiologicalProcess	GO:0010038	response to metal ion	0.00179256	25	154	CACNA1G, MGP, ASS1, BCL2L1, NEDD4, SLC25A12, MAPK9, MAPK8, CP, PCSK1, PTGS2, PTEN, PTK2B, SOD1, SNCA, LEF1, TFRC, TXNIP, SYT1, GSN, GRIA3, KCNMB4, ID2, KCNMA1, KCNIP2
Pathway	LONGEVITYPATHWAY	LONGEVITYPATHWAY	0.0018049	6	14	AKT1, PIK3CA, PIK3R1, SOD2, SOD1, GH1
Pathway	s1p_s1p4_pathway	S1P4 pathway	0.0018049	6	14	MAPK1, PLCG1, GNAZ, GNAI1, GNAI2, GNA13
Pathway	h_metPathway	Signaling of Hepatocyte Growth Factor Receptor	0.00181469	10	34	MAP2K2, MAPK8, MAPK1, CRKL, CRK, RAP1B, PTEN, PTK2B, GAB1, SRC
GeneOntologyMolecularFunction	GO:0050839	cell adhesion molecule binding	0.00182567	10	40	MSN, CDK5R1, APC, PVRL3, CDH13, GRIN2A, GRIN2B, JUP, ANP32A, NPTN
GeneOntologyMolecularFunction	GO:0008013	beta-catenin binding	0.00182567	10	40	APC, SHROOM2, CSNK2A1, TBL1XR1, PTPRK, LEF1, TCF7L2, APC2, TBL1X, GSK3B
GeneOntologyBiologicalProcess	GO:0043393	regulation of protein binding	0.00184714	10	40	PRMT8, ADD1, MEF2C, ARRB2, CALD1, PRKCD, HDAC5, SMARCD3, GTPBP4, TCF7L2
Pathway	h_mapkPathway	MAPKinase Signaling	0.00186748	18	83	MAX, MEF2A, ARAF, NFKBIA, MAP2K2, MAPK9, MAPK8, MAPK6, MAPK1, CREB1, ATF2, CREBBP, MAPK14, RAC1, MAP2K4, MAP4K5, FOS, MAP3K7
GeneOntologyMolecularFunction	GO:0005543	phospholipid binding	0.00189493	31	206	ABCA1, AKT1, MAP1B, HIP1R, APBA1, EEA1, ARHGAP32, PRKCI, VPS24, PIK3C2A, PIK3R1, DAB1, LANCL2, LPAR1, SNCA, F3, SGK3, NISCH, PITPNB, CLVS1, VAMP2, SYT1, RPH3A, ARHGAP33, WDFY3, PCLO, SBF2, WDFY1, SNX13, SYT2, SYT11
Pathway	hsa04910	Insulin signaling pathway	0.00190343	26	138	AKT1, ARAF, CBL, MAP2K2, MAPK9, PRKCI, MAPK8, MAPK1, PRKAR1B, PRKAR1A, PRKAR2A, PRKAR2B, PRKACB, PPP1R3C, CRKL, CRK, AKT3, PFKP, PFKL, PDPK1, PIK3CA, PIK3R1, RPS6, SORBS1, GSK3B, SHC3
GeneOntologyBiologicalProcess	GO:0060070	Wnt receptor signaling pathway through beta-catenin	0.00197731	11	47	APC, CDK14, TBL1XR1, FGFR2, CCNY, TCF7L2, STK11, TBL1X, GSK3B, UBE2B, JUP
Pathway	epopathway	EPO signaling pathway	0.00198439	11	40	BCL2L1, CBL, MAPK8, CRKL, PLCG1, MAPK14, PIK3R1, CSNK2A1, GAB1, FOS, JAK2
GeneOntologyBiologicalProcess	GO:0015837	amine transport	0.00199292	27	172	APBA1, CHRNA6, SLC6A5, CACNB4, CACNA1A, RTN4, SLC25A12, PINK1, CNR1, PRKCD, SLC43A2, CRYM, SLC22A8, DRD2, SLC18A2, SLC6A4, SNCA, SLC1A6, SLC1A1, SLC1A2, NISCH, GABBR1, ARL6IP5, YWHAZ, HTR2C, SLC7A5, SERINC1
GeneOntologyBiologicalProcess	GO:0014047	glutamate secretion	0.0020034	7	22	ADORA1, APBA1, NTRK2, SNCA, GABBR1, GRM2, GRIN2B
GeneOntologyBiologicalProcess	GO:0019216	regulation of lipid metabolic process	0.00202433	24	147	SERPINA3, ABCA1, ADORA1, AKT1, PNPLA2, NFKBIA, SMEK2, MAPK9, CNR1, PDGFA, CAB39, RAC1, ACSL4, SOD1, SNCA, VAV3, INSIG2, STK11, SORBS1, NR3C1, SF1, KCNMA1, GPAM, CAB39L
GeneOntologyCellularComponent	GO:0030863	cortical cytoskeleton	0.00206842	12	55	ACTB, ACTN4, SHROOM2, CALD1, LANCL2, DLG4, EPB41L2, CAP1, TMOD1, SPTBN1, CLASP1, LASP1
Pathway	P00056	VEGF signaling	0.00207024	13	52	AKT1, ARAF, PRKCI, MAPK6, MAPK1, PRKCG, PRKCD, PLCG1, PIK3C2A, PIK3CA, MAPK14, PIK3R1, HIF1A
GeneOntologyCellularComponent	GO:0030667	secretory granule membrane	0.00207114	11	48	SCAMP1, RAB27B, TMED2, SNCA, GP1BB, ATP8A1, VAMP7, VAMP2, SYT1, SYT2, LAMP2
GeneOntologyMolecularFunction	GO:0030955	potassium ion binding	0.00207802	22	131	ATP1B2, KCNAB2, KCNIP4, SLC12A2, SCN1A, KCNMA1, KCNQ2, KCNJ9, KCND2, KCNC4, KCNC3, KCNC1, KCNB1, KCNF1, KCND3, KCNA6, KCNA2, HCN3, KCNIP2, KCNIP3, KCNAB1, SLC12A5
GeneOntologyBiologicalProcess	GO:0018210	peptidyl-threonine modification	0.00209532	8	28	MAP2, MAPK8, NLK, AKT3, PDPK1, HIPK3, SBK1, GALNT1
GeneFamily	KIF	Kinesins	0.00211741	7	39	KIF1A, KIFC2, KIF2A, KIF5A, KIF5B, KIF5C, KIF1B
GeneFamily	DNAJ	DnaJ (Hsp40) homologs	0.00211741	7	39	DNAJA3, DNAJC18, DNAJC6, DNAJB6, DNAJC5, DNAJB14, DNAJB4
Pathway	h_bArrestin-srcPathway	Roles of ¬ø-arrestin-dependent Recruitment of Src Kinases in GPCR Signaling	0.00212218	7	19	ADCY1, MAP2K2, MAPK1, DNM1, GNB1, SRC, PLCB1
Pathway	a4b1_paxdep_pathway	Paxillin-dependent events mediated by a4b1	0.00212218	7	19	CBL, CRKL, CRK, PIK3CA, PIK3R1, GIT1, RAC1
Pathway	PW:0000015	Alzheimer disease	0.00215088	8	24	ACHE, MAPT, APBA1, SNCA, GNAZ, GNB1, GSK3B, LPL
Pathway	CSKPATHWAY	CSKPATHWAY	0.00215088	8	24	ADCY1, PRKAR1B, PRKAR1A, PRKAR2A, PRKAR2B, PRKACB, CREBBP, GNB1
Pathway	ST_MONOCYTE_AD_PATHWAY	ST MONOCYTE AD	0.00215088	8	24	AKT1, APC, MAPK1, DLG4, RAC1, GNAQ, GNAI1, KCNJ9
GeneOntologyBiologicalProcess	GO:0043254	regulation of protein complex assembly	0.00215326	19	107	ADD1, MAP1B, MAPT, APC, PINK1, TMOD3, MAPK8, ARPC3, ARPC1B, RDX, DLG1, RICTOR, RAC1, SGK1, STXBP1, SPTBN1, GSK3B, GSN, TPM1
GeneOntologyMolecularFunction	GO:0019992	diacylglycerol binding	0.00220248	14	69	ARAF, ARHGEF2, CHPT1, DGKE, CHN1, PRKCI, PRKCG, PRKCD, RASGRP1, DGKG, DGKB, CIT, VAV3, TENC1
GeneOntologyMolecularFunction	GO:0015179	L-amino acid transmembrane transporter activity	0.00222904	10	41	OCA2, SLC17A6, SLC25A12, SLC43A2, SLC6A13, SLC1A6, SLC1A1, SLC1A2, SLC7A5, SERINC1
GeneOntologyCellularComponent	GO:0030175	filopodium	0.00223255	9	35	RAPH1, MSN, FAM65B, RDX, SLC9A3R1, FSCN1, BAIAP2, RUFY3, ERMN
GeneOntologyBiologicalProcess	GO:0051291	protein heterooligomerization	0.00224017	16	84	KCNAB2, PRKAR2A, PARVA, HR, NRXN1, CAB39, GABRA6, GLRA1, STK11, NLGN1, YWHAB, IDE, KCND2, JUP, KCNIP2, LIMS1
GeneOntologyBiologicalProcess	GO:0044087	regulation of cellular component biogenesis	0.0022544	28	182	SACS, ADD1, MAP1B, MAPT, APC, PINK1, TMOD3, MAPK8, ARPC3, ARPC1B, CAND1, RDX, DLG1, RICTOR, PTEN, RAC1, SGK1, SDC4, CDC42EP1, STXBP1, SPTBN1, GSK3B, GSN, GRIN1, HSPA1B, HMGA1, HMGB1, TPM1
Pathway	erbb4_pathway	ErbB4 signaling events	0.0023079	10	35	MDM2, NEDD4, MAPK1, PIK3CA, PIK3R1, DLG4, WWP1, NRG3, GRIN2B, JAK2
GeneOntologyBiologicalProcess	GO:0002028	regulation of sodium ion transport	0.00232631	6	17	AKT1, NEDD4, AKT3, DRD2, SLC8A1, SGK1
GeneOntologyBiologicalProcess	GO:0043666	regulation of phosphoprotein phosphatase activity	0.00232631	6	17	PPP2R4, PPP1R2, AKAP6, RCAN1, DRD2, JAK2
GeneOntologyBiologicalProcess	GO:0070482	response to oxygen levels	0.00235027	25	157	ACTN4, MT3, ALAS2, BCL2L1, UBQLN1, CAMK2D, CD38, CDKN1A, ARNT2, CREBBP, PDGFA, PDGFRA, DRD2, PTK2B, SLC8A1, SOD2, DDIT4, TH, TF, TFRC, HYOU1, HIF1A, UBE2B, HSP90B1, KCNMA1
GeneOntologyCellularComponent	GO:0042583	chromaffin granule	0.00235936	3	4	ATP8A1, SYT1, SYT2
GeneOntologyMolecularFunction	GO:0017124	SH3 domain binding	0.00236232	19	108	SIRPA, ADAM10, MAPT, USP8, PAK3, CBL, DNAJC6, ELMO1, ZFP106, QKI, SH3BGR, SH3BGRL, EPS15, CIT, BAIAP2, GJA1, WIPF3, TP53BP2, SHANK3
GeneOntologyCellularComponent	GO:0005911	cell-cell junction	0.00236408	31	212	TLN2, ADCYAP1R1, ADD3, PANX2, APC, SHROOM2, ARHGEF2, BAI1, GJC2, PVRL3, LIN7C, PNN, KEAP1, PRKCI, GJC1, MPP5, ASH1L, DLG1, SSX2IP, PTPRK, SLC2A1, SCN1A, CADM1, GJB1, GJA1, CLDN5, SORBS1, JAM2, GJC3, JUP, LMO7
GeneOntologyBiologicalProcess	GO:0007028	cytoplasm organization	0.00236639	11	48	DST, PDPK1, PLEC, PTEN, PTPRK, PTK2B, SDC4, TNS1, SORBS1, KIF5B, ITGB4
GeneOntologyBiologicalProcess	GO:0032535	regulation of cellular component size	0.00244553	28	183	ADD1, MAP1B, MAPT, SHROOM2, DCLK1, ARHGAP5, ATP2B2, RTN4, CD38, CDH13, TMOD3, VPS24, CREB1, ARPC3, ARPC1B, RDX, DLG1, RICTOR, RAC1, PTK2B, SGK1, EXTL3, CIT, SPTBN1, GSN, NEBL, HSPA1B, TPM1
GeneOntologyBiologicalProcess	GO:0048755	branching morphogenesis of a nerve	0.00247874	3	4	DRD2, EPHA7, FGFR2
GeneOntologyBiologicalProcess	GO:0060087	relaxation of vascular smooth muscle	0.00247874	3	4	SOD1, GUCY1A3, KCNMA1
Pathway	PW:0000543	protein kinase A (PKA) signaling	0.00251262	12	47	ADCY1, PRKAR1B, PRKAR1A, PRKAR2A, PRKAR2B, PRKACB, PDE1A, PDE2A, PDE4A, AKAP9, AKAP6, PDE10A
GeneFamily	WDR	WD repeat domain genes	0.00257722	13	113	WIPI2, WDR33, DCAF7, WDR77, DMWD, PHIP, WDR37, WDR47, WDFY3, WDR35, WDFY1, WDR48, FBXW11
GeneOntologyBiologicalProcess	GO:0034097	response to cytokine stimulus	0.00262312	17	93	SERPINA3, ADAM10, MCL1, BCL2L1, CD38, PRKCI, PPP3CB, PDGFRA, PCSK1, PTGS2, SNCA, FNTB, FOS, SRC, HMGB1, IL6ST, IRAK1
Pathway	h_vdrPathway	Control of Gene Expression by Vitamin D Receptor	0.0026238	9	30	BAZ1B, MED1, CREBBP, SMARCE1, SUPT16H, TOP2B, SRC, NCOA2, SNW1
Pathway	HDACPATHWAY	HDACPATHWAY	0.0026238	9	30	AKT1, MEF2A, MEF2C, PPP3CB, HDAC5, PIK3CA, MAPK14, PIK3R1, SYT1
Pathway	igf1_pathway	IGF1 pathway	0.0026238	9	30	AKT1, PRKCD, CRKL, CRK, PDPK1, PIK3CA, PIK3R1, GRB10, YWHAZ
GeneOntologyCellularComponent	GO:0005802	trans-Golgi network	0.00266404	15	79	ADAM10, AP2B1, PACSIN1, GOLPH3, CPD, PCSK1, SCAMP1, RAB31, CLVS1, GH1, SCAMP5, VAMP2, PCSK1N, KIAA0368, ATP2C1
GeneOntologyBiologicalProcess	GO:0050931	pigment cell differentiation	0.00266549	7	23	KITLG, OCA2, EDN3, EDNRB, SOD2, GNAQ, SOX10
GeneOntologyBiologicalProcess	GO:0034311	diol metabolic process	0.00266549	7	23	MAOA, MTPN, ATF2, COMT, TH, SULT1A1, HTR2C
GeneOntologyBiologicalProcess	GO:0021695	cerebellar cortex development	0.00266549	7	23	MTPN, ATP2B2, CACNA1A, RORA, DIXDC1, KLHL1, AGTPBP1
GeneOntologyBiologicalProcess	GO:0040018	positive regulation of multicellular organism growth	0.00267525	8	29	AKT1, CREB1, CHD7, DLG1, DRD2, GH1, CELF1, GPAM
GeneOntologyBiologicalProcess	GO:0006913	nucleocytoplasmic transport	0.00272253	34	237	ADAM10, MBTPS1, AKT1, MXI1, TNPO2, BMPR1A, PPP1R12A, NEDD4, NFKBIA, G3BP2, MAPK1, PKIA, CEP57, SFRS13A, ATXN1, NUDT4, TCF7L2, TXNIP, SPTBN1, GSK3B, IPO8, HSPA9, TRPS1, TPR, KPNA3, KPNA1, KPNB1, JUP, JAK2, ANP32A, FYTTD1, THOC3, UHMK1, TNPO1
GeneOntologyBiologicalProcess	GO:0043434	response to peptide hormone stimulus	0.00272305	29	193	SERPINA3, AKT1, MAP1B, ACVR1C, BCL2L1, APPL1, PRKCI, PRKCD, HDAC5, AKT3, PDPK1, PCSK1, PIK3R1, ZFP106, EIF4EBP2, PTPRN, SGK1, GAB1, BAIAP2, PHIP, GH1, SORBS1, SRC, GRB10, IGF2, UBE2B, JAK2, NR4A3, GPAM
GeneOntologyBiologicalProcess	GO:0060021	palate development	0.00273211	10	42	ACVR2B, SGPL1, BMPR1A, TIPARP, PDGFRA, CHD7, DLG1, LEF1, INSIG2, SATB2
Pathway	h_hcmvPathway	Human Cytomegalovirus and Map Kinases	0.00274578	6	15	AKT1, MAP2K2, MAPK1, CREB1, CREBBP, MAPK14
Pathway	h_myosinPathway	PKC-catalyzed phosphorylation of inhibitory phosphoprotein of myosin phosphatase	0.00274578	6	15	ARHGAP5, ARHGEF1, GNAQ, GNB1, GNA13, PLCB1
Pathway	CDC42RACPATHWAY	CDC42RACPATHWAY	0.00274578	6	15	PDGFRA, ARPC3, ARPC1B, PIK3CA, PIK3R1, RAC1
Pathway	h_erk5Pathway	Role of Erk5 in Neuronal Survival	0.00274578	6	15	AKT1, MEF2A, MAPK1, CREB1, CREBBP, PLCG1
GeneOntologyBiologicalProcess	GO:0006898	receptor-mediated endocytosis	0.00275217	15	78	ACHE, HIP1R, ARRB2, CBL, NEDD4, STAB2, DNM1, DRD2, CTTN, RAC1, SNCA, CAP1, GH1, RAMP3, SYNE1
GeneOntologyBiologicalProcess	GO:0042552	myelination	0.00279584	12	56	MBP, MAL, POU3F1, PLP1, QKI, SOD1, SCN8A, CLDN5, TF, GJC3, UGT8, SBF2
GeneOntologyBiologicalProcess	GO:0007416	synapse assembly	0.00279584	12	56	ACHE, MAP1B, CACNA1A, DNM3, SPOCK2, NRXN2, NRXN1, DRD2, CADM1, GRIN1, NLGN1, NLGN2
GeneOntologyBiologicalProcess	GO:0044092	negative regulation of molecular function	0.00289807	33	229	ADCY1, WNK1, ADORA1, AKT1, XIAP, ARRB2, DNAJA3, OPRM1, PALM, NFKBIA, CDKN1A, CNR1, PKIA, HIPK3, HR, CAND1, DRD2, SNCA, IL1RAPL1, GABBR1, GNAZ, GNAI1, GNAI2, TCF7L2, HDAC2, GSK3B, DUSP19, HSPA1B, ID2, JAK2, NCS1, IRAK1, ERRFI1
GeneOntologyCellularComponent	GO:0005913	cell-cell adherens junction	0.00290768	10	43	APC, SHROOM2, PVRL3, KEAP1, DLG1, SSX2IP, GJA1, SORBS1, JUP, LMO7
GeneOntologyBiologicalProcess	GO:0010608	posttranscriptional regulation of gene expression	0.00293049	36	256	NAPG, AKT1, EIF5A2, MTPN, MDM2, CPEB2, EIF3A, KIAA0427, MAPK1, PRKCD, PEX6, CPEB1, DHX9, DIO2, QKI, PTEN, SELT, EIF4B, EIF4G1, EIF5, EIF4EBP2, PUM1, PTK2B, GTPBP4, SYNCRIP, STXBP1, CELF1, HSPB1, SERP1, EIF2C2, UBE2B, TARDBP, USP7, TNRC6B, UHMK1, METAP1
GeneFamily	ZFYVE	Zinc fingers, FYVE type	0.00295297	6	31	EEA1, PLEKHF1, ZFYVE20, RUFY3, WDFY3, WDFY1
Pathway	ecadherin_keratinocyte_pathway	E-cadherin signaling in keratinocytes	0.00297542	7	20	AKT1, PLCG1, PIK3CA, PIK3R1, RAC1, SRC, JUP
Pathway	P53HYPOXIAPATHWAY	P53HYPOXIAPATHWAY	0.00297542	7	20	AKT1, MDM2, CDKN1A, MAPK8, CSNK1D, HSPA1A, HIF1A
GeneOntologyBiologicalProcess	GO:0042176	regulation of protein catabolic process	0.00298038	18	102	AKT1, MDM2, APC, SH3D19, NEDD4, PRKCG, PIK3R1, CSNK1D, RAB23, PTPN3, TIMP2, TIMP3, GJA1, MGEA5, HDAC2, GRIN2A, GRIN2C, IDE
GeneOntologyBiologicalProcess	GO:0070727	cellular macromolecule localization	0.00298038	18	102	MDM2, APBA1, ARCN1, BICD1, CNTNAP2, NFKBIA, MAPK1, TCF7L2, MGEA5, TXNIP, YWHAZ, KPNB1, SYNE1, JUP, JAK2, KCNIP3, FCHO1, ZBTB16
Pathway	P00006	Apoptosis signaling	0.00298761	20	100	AKT1, XIAP, MCL1, BCL2L1, NFKBIA, MAPK9, MAPK8, MAPK1, PRKCG, PRKCD, AKT3, CREB1, ATF2, PIK3CA, MAP2K4, MAP4K5, FOS, HSPA8, HSPA1A, HSPA1B
GeneOntologyMolecularFunction	GO:0015270	dihydropyridine-sensitive calcium channel activity	0.00301517	4	8	CACNB3, CACNA1C, CACNB1, CACNA2D1
GeneOntologyBiologicalProcess	GO:0021702	cerebellar Purkinje cell differentiation	0.00303272	4	8	ATP2B2, CACNA1A, RORA, AGTPBP1
Pathway	avb3_integrin_pathway	Integrins in angiogenesis	0.00303991	12	48	AKT1, CBL, MAPK1, EDIL3, PIK3C2A, PIK3CA, PIK3R1, RAC1, PTK2B, VAV3, SRC, ITGAV
GeneOntologyCellularComponent	GO:0030141	secretory granule	0.00304617	37	270	SYNPR, ACTN4, AP2A1, SYT7, NPTX1, SLC17A7, SLC17A6, POMC, SV2B, PDGFA, PCSK1, SCAMP1, DRD2, RAB27B, TMED2, SNCA, GH1, GP1BB, ATP8A1, SCAMP5, TF, STXBP1, STX1A, VAMP7, VAMP2, VAMP1, SYPL1, SYT1, HCRT, RPH3A, PCSK1N, VEGFB, NCS1, SYT2, SYT11, LAMP2, ATP2C1
GeneOntologyBiologicalProcess	GO:0051056	regulation of small GTPase mediated signal transduction	0.00308672	39	284	SCAI, KALRN, ARHGEF2, KITLG, ARHGEF1, NGEF, PAFAH1B1, TBC1D15, KIAA1244, RABGAP1L, IQSEC1, CRK, ARFGAP1, RASGRP1, TBC1D23, RASGRF2, GIT1, LPAR1, RICTOR, RAPGEF6, RAC1, AGAP1, AGAP3, PTK2B, ITSN1, IQGAP2, ARPP19, RABGAP1, RAPGEF4, RALGAPA1, VAV3, TIMP2, RASGEF1A, SHOC2, PLEKHG1, EVI5, TBC1D14, ARHGEF9, TBC1D24
GeneOntologyBiologicalProcess	GO:0002791	regulation of peptide secretion	0.00312908	15	79	ADORA1, SYT7, ACVR1C, CD38, NEUROD1, CNR1, PFKL, CHD7, DRD2, GABBR1, TCF7L2, STX1A, MGEA5, SERP1, JAK2
Pathway	PELP1PATHWAY	PELP1PATHWAY	0.00316082	4	7	MAPK1, CREBBP, SRC, PELP1
GeneOntologyBiologicalProcess	GO:0046883	regulation of hormone secretion	0.00319667	21	127	ADORA1, SYT7, ACVR1C, CHRNA6, RTN4, CD38, NEUROD1, PINK1, CNR1, CREB1, PFKL, CHD7, EDN3, DRD2, SNCA, GABBR1, TCF7L2, STX1A, MGEA5, SERP1, JAK2
GeneOntologyMolecularFunction	GO:0019902	phosphatase binding	0.00322429	12	57	STRN3, CACNA1C, NCAM1, PPP2R4, RCAN2, PIK3R1, DLG1, SOD1, CARHSP1, SBF2, JUP, SHOC2
GeneOntologyCellularComponent	GO:0005912	adherens junction	0.00322834	26	172	TLN2, APC, SHROOM2, OPRM1, PVRL3, KEAP1, PARVA, DLG1, SSX2IP, GIT1, PTPRK, PTK2B, SDC4, GJA1, TNS1, DIXDC1, SORBS1, RHOU, SYNM, TENC1, JUP, ITGB5, ITGAV, LMO7, LIMS1, LASP1
Pathway	h_ppargPathway	Role of PPAR-gamma Coactivators in Obesity and Thermogenesis	0.0032731	5	11	MED1, CREBBP, SRC, NCOA2, LPL
GeneOntologyMolecularFunction	GO:0042169	SH2 domain binding	0.00334068	8	30	ADAM10, ARHGAP5, SYNGR3, NLK, CRK, DAB1, SRC, JAK2
Pathway	P00003	Alzheimer disease-amyloid secretase	0.00335271	14	61	ADAM10, APBA1, CACNB1, CACNB2, CHRM1, MAPK9, PRKCI, MAPK8, MAPK6, MAPK1, PRKCG, PRKCD, PCSK1, MAPK14
Pathway	lis1pathway	Lissencephaly gene (LIS1) in neuronal migration and development	0.003362	9	31	CDK5R2, CDK5R1, MAP1B, PAFAH1B2, PAFAH1B1, CSNK2A1, DAB1, RAC1, DYNLT1
Pathway	P05917	Opioid proopiomelanocortin	0.003362	9	31	POMC, VAMP3, GNG12, GNG2, GNB1, GNAI1, GNAI2, VAMP2, VAMP1
Pathway	NO1PATHWAY	NO1PATHWAY	0.003362	9	31	AKT1, CHRM1, PRKAR1B, PRKAR1A, PRKAR2A, PRKAR2B, PRKACB, PDE2A, SYT1
GeneOntologyCellularComponent	GO:0016605	PML body	0.00336635	9	37	MAX, HIPK1, CREBBP, HIPK3, HIPK2, SFRS2, CBX5, TRIM8, ZBTB16
GeneOntologyBiologicalProcess	GO:0019935	cyclic-nucleotide-mediated signaling	0.00346527	24	153	ADCY1, ADCYAP1R1, ADORA1, OPRL1, OPRM1, P2RY12, NPY, CNR1, PRKACB, SLC9A3R1, DRD2, EIF4EBP2, RIMS2, FZD2, NUDT4, RAPGEF4, GNAQ, GNAZ, GNAI1, GNAI2, GNA13, GRM4, SSTR4, PCLO
GeneOntologyMolecularFunction	GO:0016594	glycine binding	0.00353625	5	13	ALAS2, SRR, GLRA1, GRIN1, GRIN2B
GeneOntologyBiologicalProcess	GO:0032350	regulation of hormone metabolic process	0.00356063	5	13	CACNA1A, TCF7L2, NR3C1, HIF1A, KCNMA1
GeneOntologyBiologicalProcess	GO:0014911	positive regulation of smooth muscle cell migration	0.00356063	5	13	F3, RAPGEF4, SRC, HMGB1, IL6ST
GeneOntologyBiologicalProcess	GO:0043524	negative regulation of neuron apoptosis	0.00360789	13	65	XIAP, BCL2L1, CACNA1A, HIPK2, DNAJC5, SOD2, SOD1, SNCA, SNCB, ITSN1, STXBP1, GRIK2, GRIN1
Pathway	il2_pi3kpathway	IL2 signaling events mediated by PI3K	0.00361499	10	37	AKT1, BCL2L1, EIF3A, PIK3CA, PIK3R1, RAC1, RPS6, SGMS1, UGCG, JAK1
Pathway	h_p38mapkPathway	p38 MAPK Signaling	0.00361499	10	37	MAX, MEF2A, CREB1, ATF2, CREBBP, MAPK14, RAC1, MAP2K4, MAP3K7, HSPB1
Pathway	P00048	PI3 kinase	0.00365335	12	49	AKT1, AKT3, PDPK1, PIK3CA, PIK3R1, PTEN, GNB1, GNAI1, GNAI2, GSK3B, JAK2, JAK1
Pathway	atf2_pathway	ATF-2 transcription factor network	0.00365335	12	49	ACHE, CUL3, MAPK9, MAPK8, MAPK1, CREB1, ATF2, PDGFRA, MAPK14, DUSP8, FOS, TH
Pathway	foxopathway	FoxO family signaling	0.00365335	12	49	AKT1, MAPK9, MAPK8, CREBBP, CSNK1D, SOD2, SGK1, YWHAG, YWHAZ, YWHAB, USP7, ZFAND5
GeneOntologyMolecularFunction	GO:0005267	potassium channel activity	0.00367317	22	137	MTMR6, KCNAB2, KCTD17, KCNIP4, SCN1A, KCNMB4, KCNMA1, KCNQ2, KCNJ9, KCND2, KCNC4, KCNC3, KCNC1, KCNB1, KCNF1, KCND3, KCNA6, KCNA2, HCN3, KCNIP2, KCNIP3, KCNAB1
Pathway	CIRCADIAN_EXERCISE	CIRCADIAN_EXERCISE	0.00369522	11	43	KLF9, ZFR, NR1D2, PPP1R3C, CRY1, PER1, PURA, CLDN5, GFRA1, HSPA8, NCOA4
Pathway	P00030	Hypoxia response via HIF activation	0.00378554	8	26	AKT1, AKT3, CREBBP, PIK3C2A, PIK3CA, PIK3R1, PTEN, HIF1A
Pathway	hsa04660	T cell receptor signaling pathway	0.00380278	21	109	AKT1, PAK3, CBL, NFKBIA, MAP2K2, MAPK9, MAPK1, PPP3R1, PPP3CB, AKT3, PLCG1, RASGRP1, PIK3CA, MAPK14, PIK3R1, DLG1, CHP, FOS, VAV3, MAP3K7, GSK3B
Pathway	hsa04510	Focal adhesion	0.00395619	34	205	TLN2, ACTB, ACTN4, AKT1, XIAP, ARHGAP5, PAK3, PPP1R12A, MAPK9, MAPK8, MAPK1, COL1A2, PRKCG, CRKL, CRK, AKT3, PDGFA, PDGFRA, PDPK1, PARVA, PIK3CA, PIK3R1, RAP1B, PTEN, RAC1, VAV3, SRC, GSK3B, SHC3, VEGFB, PIP5K1C, ITGB4, ITGB5, ITGAV
Pathway	h_ck1Pathway	Regulation of ck1/cdk5 by type 1 glutamate receptors	0.0040109	6	16	CDK5R1, PRKAR1B, CSNK1D, DRD2, PPP1R1B, PLCB1
Pathway	h_vipPathway	Neuropeptides VIP and PACAP inhibit the apoptosis of activated T cells	0.0040109	6	16	NFKBIA, PRKAR1B, PLCG1, EGR3, GNAQ, VIP
Pathway	BIOGENIC_AMINE_SYNTHESIS	BIOGENIC_AMINE_SYNTHESIS	0.0040109	6	16	ACHE, MAOA, COMT, TH, GAD2, GAD1
Pathway	GATA3PATHWAY	GATA3PATHWAY	0.0040109	6	16	PRKAR1B, PRKAR1A, PRKAR2A, PRKAR2B, PRKACB, MAPK14
GeneOntologyCellularComponent	GO:0005881	cytoplasmic microtubule	0.00402956	6	19	APC, PAFAH1B1, SS18, CLASP1, CLASP2, MTUS2
GeneOntologyCellularComponent	GO:0043209	myelin sheath	0.00402956	6	19	MBP, RTN4, EXOC4, PLP1, GJC3, ERMN
Pathway	s1p_meta_pathway	Sphingosine 1-phosphate (S1P) pathway	0.00406816	7	21	SGPL1, GNAQ, GNAZ, GNAI1, GNAI2, GNA13, SGPP1
Pathway	h_ptdinsPathway	Phosphoinositides and their downstream targets.	0.00406816	7	21	GRASP, AKT1, EEA1, PDPK1, PLCG1, RAC1, GSK3B
Pathway	p38_mk2pathway	p38 signaling mediated by MAPKAP kinases	0.00406816	7	21	CREB1, MAPK14, TH, HSPB1, YWHAG, YWHAZ, YWHAB
Pathway	h_botulinPathway	Blockade of Neurotransmitter Relase by Botulinum Toxin	0.00415631	3	4	CHRM1, STX1A, VAMP2
Pathway	ar_pathway	Coregulation of Androgen receptor activity	0.00416915	13	56	AKT1, UBA3, PIAS1, APPL1, MED1, PTK2B, VAV3, TCF4, NCOA2, GSN, UBE3A, NCOA4, PELP1
Pathway	hsa05014	Amyotrophic lateral sclerosis (ALS)	0.00416915	13	56	BCL2L1, DERL1, PPP3R1, PPP3CB, MAPK14, RAC1, SOD1, SLC1A2, CHP, GRIN2A, GRIN1, GRIN2C, GRIN2B
Pathway	hsa04210	Apoptosis	0.00417341	18	89	AKT1, XIAP, BCL2L1, NFKBIA, PRKAR1B, PRKAR1A, PRKAR2A, PRKAR2B, PRKACB, PPP3R1, PPP3CB, AKT3, PIK3CA, PIK3R1, CHP, IL1RAP, IRAK1, ENDOD1
GeneOntologyCellularComponent	GO:0034708	methyltransferase complex	0.00443104	12	60	ACTB, MAX, MLL, OGT, PHF20, RBBP4, KIAA1267, HDAC2, PAXIP1, CBX5, SUZ12, PELP1
Pathway	ephbfwdpathway	EPHB forward signaling	0.00445832	10	38	KALRN, MAPK1, PIK3CA, PIK3R1, RAP1B, DNM1, RAC1, ITSN1, TF, SRC
Pathway	hsa04070	Phosphatidylinositol signaling system	0.00446525	16	76	CDS2, DGKE, PRKCG, PLCB4, PLCG1, PIK3C2A, PIK3CA, PIK3R1, PIP4K2A, DGKG, DGKB, PTEN, PIP5K1C, ITPKA, INPP4A, PLCB1
Pathway	hsa04370	VEGF signaling pathway	0.00446525	16	76	AKT1, MAP2K2, MAPK1, PRKCG, PPP3R1, PPP3CB, AKT3, PLCG1, PIK3CA, MAPK14, PIK3R1, PTGS2, RAC1, CHP, SRC, HSPB1
GeneFamily	DYN	Cytoplasmic dyneins	0.0045081	4	15	DYNC1LI2, DYNC1LI1, DYNLT3, DYNLT1
Pathway	P04393	Ras	0.0045773	14	63	AKT1, ARAF, MAP2K2, MAPK9, MAPK8, MAPK1, AKT3, ATF2, PDPK1, PIK3CA, MAPK14, RAC1, MAP2K4, GSK3B
GeneOntologyCellularComponent	GO:0048786	presynaptic active zone	0.00478176	4	9	ADORA1, NTRK2, GRM3, KCNMA1
GeneOntologyCellularComponent	GO:0035253	ciliary rootlet	0.00478176	4	9	KLC1, KIF5A, KIF5B, KIF5C
Pathway	ephrinbrevpathway	Ephrin B reverse signaling	0.00489778	8	27	MAPK8, PIK3CA, PIK3R1, DNM1, RAC1, MAP2K4, MAP3K7, SRC
Pathway	retinoic_acid_pathway	Retinoic acid receptors-mediated signaling	0.00489778	8	27	AKT1, MAPK8, MAPK1, PRKCG, CREBBP, MAPK14, NCOR2, NCOA2
GeneOntologyCellularComponent	GO:0016323	basolateral plasma membrane	0.00537125	36	270	TLN2, MSN, ADORA1, ANK3, AQP4, OPRM1, DST, DDR1, SLC4A4, LIN7C, KEAP1, SLC23A2, PARVA, PLEC, SLC22A8, DLG1, GIT1, PTK2B, SLC12A2, SLC2A1, SDC4, RAPGEF4, CADM1, TNS1, TF, DIXDC1, SORBS1, RHOU, HSPA1B, TENC1, JUP, ITGB4, ITGB5, ITGAV, LIMS1, LASP1
Pathway	PW:0000154	inositol phosphate metabolic	0.00543961	7	22	PLCB4, PLCG1, PTEN, DYRK1A, TESK1, ITPKA, PLCB1
GeneOntologyCellularComponent	GO:0015629	actin cytoskeleton	0.00545048	38	289	TLN2, ACTN4, ADD1, KALRN, SHROOM2, DNAJA3, DST, CALD1, GAS7, CLIC4, TMOD3, ARHGAP32, WDR1, ARPC3, ARPC1B, DBN1, LANCL2, SLC9A3R1, GNG12, TWF1, EPB41L2, FSCN1, SNCA, IQGAP2, CIT, CAP1, CORO2B, TNNT1, STX1A, SORBS1, SPTBN1, GSN, RHOU, RPH3A, TPM1, JUP, SGPP1, LASP1
GeneOntologyCellularComponent	GO:0016585	chromatin remodeling complex	0.00545367	14	77	BAZ1B, NAP1L1, SMARCA5, HDAC5, HR, TBL1XR1, RSF1, NCOR2, MORF4L1, SMARCD3, SMARCE1, TBL1X, SATB2, CBX5
GeneOntologyCellularComponent	GO:0032809	cell soma membrane	0.00552125	3	5	CADM2, GABRA6, KCNB1
GeneOntologyCellularComponent	GO:0042788	polysomal ribosome	0.00552125	3	5	FMR1, RPL29, NUFIP2
GeneOntologyCellularComponent	GO:0030285	integral to synaptic vesicle membrane	0.00552125	3	5	SYNPR, SV2B, GABRA2
Pathway	hsa05218	Melanoma	0.00561564	15	71	AKT1, MDM2, ARAF, CDKN1A, MAP2K2, MAPK1, AKT3, PDGFA, PDGFRA, PIK3CA, PIK3R1, PTEN, FGFR1, FGF13, FGF14
Pathway	hsa04730	Long-term depression	0.00561564	15	71	ARAF, CACNA1A, MAP2K2, MAPK1, PRKCG, PLCB4, GNAQ, GNAZ, GNAI1, GNAI2, GUCY1B3, GUCY1A3, GNA13, GRIA3, PLCB1
Pathway	p53regulationpathway	p53 pathway	0.00572916	13	58	AKT1, MDM2, CCNG1, MAPK9, MAPK8, PRKCD, PPP2R4, CREBBP, MAPK14, CSNK1D, HIPK2, GSK3B, USP7
Pathway	ACETYLCHOLINE_SYNTHESIS	ACETYLCHOLINE_SYNTHESIS	0.00580308	4	8	ACHE, CHKA, PDHA1, PCYT1A
Pathway	P00046	Oxidative stress response	0.00611058	12	52	MAX, MEF2A, MEF2C, MAPK9, MAPK8, ATF2, MAPK14, DUSP8, MAP2K4, FUS, DUSP14, DUSP19
GeneFamily	USP	Ubiquitin specific peptidases	0.00625895	7	47	USP8, USP9X, USP15, USP53, USP12, USP22, USP31
GeneOntologyCellularComponent	GO:0031256	leading edge membrane	0.0063084	11	55	ADORA1, OPRM1, CNTNAP2, PDE4A, PTPRK, SLC1A2, GABBR1, TPM1, KCNB1, DDN, SLC12A5
GeneOntologyCellularComponent	GO:0010008	endosome membrane	0.00640602	26	181	VPS33A, EEA1, MCOLN1, APPL1, GNPNAT1, ARHGAP32, PI4K2A, ZFYVE20, VPS24, CLCN3, CLCN6, STEAP2, SCAMP1, RAB5C, EPS15, MMGT1, VPS52, CLVS1, SLC9A6, SCAMP5, STAM2, VAMP7, ARL8B, MMD, LAMP2, RAB11FIP4
Pathway	erbb1_receptor_proximal_pathway	EGF receptor (ErbB1) signaling pathway	0.00658261	9	34	MAPK1, PLCG1, PIK3CA, PIK3R1, GAB1, GNAI1, SRC, GSN, PIP5K1C
Pathway	epha_fwdpathway	EPHA forward signaling	0.00658261	9	34	NGEF, CBL, CRKL, CRK, PLCG1, EPHA4, EPHA7, VAV3, SRC
Pathway	SIG_CD40PATHWAYMAP	SIG_CD40PATHWAYMAP	0.00658261	9	34	NFKBIA, MAPK9, MAPK8, MAPK1, PIK3CA, MAPK14, PIK3R1, MAP2K4, SYT1
Pathway	mapktrkpathway	Trk receptor signaling mediated by the MAPK pathway	0.00658261	9	34	CDK5R1, MEF2C, MAPK1, PRKCD, CREB1, MAPK14, RAP1B, RUSC1, FOS
Pathway	ST_JNK_MAPK_PATHWAY	ST_JNK_MAPK_PATHWAY	0.00660408	10	40	AKT1, MAPK9, MAPK8, ATF2, DUSP8, MAP2K4, GAB1, MAP3K7, MYEF2, NR2C2
GeneOntologyCellularComponent	GO:0000307	cyclin-dependent protein kinase holoenzyme complex	0.00667488	5	15	CDK5R2, CDK5R1, CDKN1A, CDK14, CCNY
Pathway	bcr_5pathway	BCR signaling pathway	0.00706871	14	66	AKT1, NFKBIA, MAPK8, MAPK1, PPP3CB, PDPK1, PIK3CA, MAPK14, PIK3R1, CSNK2A1, PTEN, RAC1, FOS, MAP3K7
Pathway	RACCYCDPATHWAY	RACCYCDPATHWAY	0.00713008	7	23	AKT1, NFKBIA, CDKN1A, MAPK1, PIK3CA, PIK3R1, RAC1
Pathway	h_mPRPathway	How Progesterone Initiates the Oocyte Maturation	0.00713008	7	23	ADCY1, PRKAR1B, CAP1, GNB1, GNAI1, SRC, BRD4
GeneOntologyCellularComponent	GO:0030673	axolemma	0.00743236	4	10	ADORA1, CNTNAP2, SLC1A2, GABBR1
GeneOntologyCellularComponent	GO:0042589	zymogen granule membrane	0.00743236	4	10	SCAMP1, RAB27B, TMED2, VAMP2
Pathway	lkb1_pathway	LKB1 signaling events	0.00761439	11	47	MAP2, CREB1, CAB39, MARK2, SMARCD3, STK11, GSK3B, YWHAG, YWHAZ, YWHAB, MARK4
Pathway	ps1pathway	Presenilin action in Notch and Wnt signaling	0.00761439	11	47	ADAM10, APC, NEDD4, MAPK1, NLK, CREBBP, CSNK2A1, FOS, MAP3K7, GSK3B, FBXW11
Pathway	tcrjnkpathway	JNK signaling in the CD4+ TCR pathway	0.00763737	5	13	MAPK8, CRKL, CRK, MAP2K4, MAP3K7
Pathway	epha2_fwdpathway	EPHA2 forward signaling	0.00775518	6	18	CBL, PIK3CA, PIK3R1, RAC1, VAV3, SRC
Pathway	wnt_calcium_pathway	Noncanonical Wnt signaling pathway	0.00775518	6	18	CAMK2A, NLK, PLCG1, GNG2, GNB1, MAP3K7
Pathway	PTENPATHWAY	PTENPATHWAY	0.00775518	6	18	AKT1, MAPK1, PDPK1, PIK3CA, PIK3R1, PTEN
Pathway	P05913	Enkephalin release	0.00785303	8	29	PRKAR2A, PRKAR2B, CREB1, GNG12, GNG2, GNB1, GNAI1, GNAI2
Pathway	ST_G_alpha_i_Pathway_	ST G alpha i	0.00806231	9	35	AKT1, MAPK1, AKT3, PLCB4, DRD2, SRC, KCNJ9, ITPKA, PLCB1
Pathway	P00033	Insulin/IGF-protein kinase B signaling cascade	0.00806231	9	35	AKT1, MDM2, PDPK1, PIK3C2A, PIK3CA, PIK3R1, PTEN, GSK3B, IGF2
Pathway	P00034	Integrin signalling	0.00829672	27	161	ACTN4, ARAF, RND3, ELMO1, MAP2K2, MAPK9, MAPK8, MAPK6, MAPK1, CRKL, CRK, ARPC3, ARPC1B, PARVA, ARFGAP1, PIK3C2A, PIK3CA, PIK3R1, RAP1B, RAC1, MEGF9, PTK2B, MAP2K4, ITGB4, ITGB5, ITGAV, LIMS1
Pathway	hsa04020	Calcium signaling pathway	0.00836699	30	184	ADCY1, CACNA1G, ATP2B2, ATP2B1, CAMK2D, CAMK2A, CACNA1B, CACNA1C, CACNA1A, CD38, CHRM1, PRKCG, PRKACB, PPP3R1, PPP3CB, PDGFRA, PDE1A, PLCB4, PLCG1, EDNRB, PTK2B, SLC8A1, CHP, GNAQ, GRIN2A, GRIN1, GRIN2C, HTR2C, ITPKA, PLCB1
Pathway	rac1_pathway	RAC1 signaling pathway	0.00837087	12	54	ARHGAP5, MAPK9, MAPK8, CRK, ATF2, ARPC3, ARPC1B, MAPK14, RAC1, MAP2K4, BAIAP2, PIP5K1C
GeneFamily	FBX	F-box genes	0.00837916	6	38	FBXO9, FBXO41, FBXO21, FBXO30, LMO7, FBXO28
Pathway	smad2_3nuclearpathway	Regulation of nuclear SMAD2/3 signaling	0.00846613	16	81	AKT1, MAX, MEF2C, CDKN1A, COL1A2, CREB1, ATF2, CREBBP, RBBP4, FOXG1, FOS, HDAC2, NCOA2, NR3C1, HSPA8, ITGB5
Pathway	h_p53hypoxiaPathway	Hypoxia and p53 in the Cardiovascular system	0.00918034	7	24	AKT1, MDM2, CDKN1A, MAPK8, HSPA1A, HSPA4, HIF1A
Pathway	P00001	Adrenaline and noradrenaline biosynthesis	0.00918034	7	24	MAOA, COMT, VAMP3, SLC18A2, TH, VAMP2, VAMP1
Pathway	PGC1APATHWAY	PGC1APATHWAY	0.00918034	7	24	MEF2A, MEF2C, CAMK2D, CAMK2A, PPP3CB, HDAC5, SYT1
GeneOntologyCellularComponent	GO:0008076	voltage-gated potassium channel complex	0.00933095	15	90	CNTNAP2, KCTD17, KCNMB4, KCNMA1, KCNQ2, KCND2, KCNC4, KCNC3, KCNC1, KCNB1, KCNF1, KCND3, KCNA6, KCNA2, KCNIP2
GeneOntologyCellularComponent	GO:0043235	receptor complex	0.00934053	19	124	ACVR1C, CHRNA6, DLG4, TOLLIP, EPS8, GABRA6, SORBS1, GRIA4, GRIK2, GRIN2A, GRIN1, GRIK5, GRIN2C, GRIN2B, IL6ST, ITGB4, ITGB5, ITGAV, IRAK1
Pathway	P04398	p53 feedback loops 2	0.00947513	10	42	AKT1, MDM2, CCNG1, AKT3, PDPK1, PIK3C2A, PIK3CA, MAPK14, PIK3R1, PTEN
Pathway	h_pkcPathway	Activation of PKC through G protein coupled receptor	0.00958618	3	5	NFKBIA, GNAQ, PLCB1
Pathway	h_iresPathway	Internal Ribosome entry	0.00958618	3	5	EIF3A, EIF4A1, EIF4G1
Pathway	botulinumtoxinpathway	Effects of Botulinum toxin	0.00959206	4	9	STXBP1, STX1A, VAMP2, SYT1
Pathway	PW:0000060	long term potentiation	0.00959206	4	9	GRIN2A, GRIN2B, KCND2, KCND3
Pathway	h_HBxPathway	Calcium Signaling by HBx of Hepatitis B virus	0.00959206	4	9	CREB1, CREBBP, PTK2B, SRC
Pathway	h_pcafpathway	The information-processing at the IFN-beta enhancer	0.00959206	4	9	POLR2A, ATF2, CREBBP, HMGB1

## Sheet: Intersection of 3 Regions
Table S2d: Functional Over-Representation Analysis of Genes Differentially Expressed in PFC, NAc & VMB
Analysis	ID	Name	FDR p-value	Genes in query	Genes in term	Gene Symbols
GeneOntologyBiologicalProcess	GO:0050804	regulation of synaptic transmission	1.8e-09	18	182	CACNA2D2, DBN1, YWHAG, DLG4, MAP1B, STXBP1, NLGN2, CAMK2A, CACNA1B, CACNA1A, NISCH, CPEB1, GRM3, GSK3B, GRIN1, ATP2B2, GRIK5, GRIN2C
GeneOntologyCellularComponent	GO:0030425	dendrite	2.35e-09	21	262	ARHGAP32, DBN1, KCNB1, PEX5L, TTLL7, CPLX2, SLC1A2, CDK5R1, MAP1B, MAP2, DLGAP3, CACNA1B, CACNA1A, DNM3, UHMK1, CPEB1, GRM3, GSK3B, GRIN1, ATP2B2, GRIK5
GeneOntologyBiologicalProcess	GO:0007269	neurotransmitter secretion	9.77e-09	13	98	YWHAZ, NRXN2, NRXN1, CPLX2, STXBP1, CAMK2A, VAMP2, CACNB4, CACNA1B, CACNA1A, SYT1, ERC2, GRIK5
MousePheno	MP:0002064	seizures	4.13e-08	26	276	KIF5A, CACNA2D2, KCNC1, NR4A3, B4GALNT1, MT3, GABRB3, DST, SLC1A2, GFAP, TEF, QKI, CDK5R1, SCN1A, KCNAB2, MBP, CAMK2A, CACNB4, PTEN, CACNA1A, CREBBP, SLC12A5, ATE1, ATOX1, GRIN1, GRIK5
GeneOntologyBiologicalProcess	GO:0050808	synapse organization	6.37e-08	12	95	CACNA2D2, SPOCK2, NRXN2, NRXN1, MAP1B, NLGN2, CACNB4, CACNA1A, DNM3, ERC2, GRIN1, ATP2B2
GeneOntologyCellularComponent	GO:0042734	presynaptic membrane	8.63e-08	9	49	KCNMA1, NRXN2, NRXN1, SLC1A2, CAMK2A, SYT1, ERC2, GRM3, GRIK5
GeneOntologyBiologicalProcess	GO:0048167	regulation of synaptic plasticity	9.33e-08	11	80	DBN1, YWHAG, DLG4, MAP1B, STXBP1, CAMK2A, CPEB1, GSK3B, GRIN1, ATP2B2, GRIN2C
GeneOntologyCellularComponent	GO:0043025	cell soma	1.17e-07	19	271	KCNB1, TTLL7, PI4K2A, CPLX2, KLHL24, CDK5R1, MAP1B, MAP2, SCN1A, MBP, CACNA1B, CACNA1A, RTN4, PDE1A, SLC12A5, GSK3B, CYGB, ATP2B2, GRIK5
GeneOntologyBiologicalProcess	GO:0010975	regulation of neuron projection development	1.38e-07	11	83	DBN1, DCC, MAP1B, MBP, PTEN, CACNA1A, HDAC2, IL1RAPL1, RTN4, GSK3B, GRIN1
GeneOntologyCellularComponent	GO:0014069	postsynaptic density	1.74e-07	11	87	ARHGAP32, YWHAZ, DLG2, DLG4, MAP1B, DLGAP3, DNM3, CPEB1, GRM3, GRIN1, GRIN2C
GeneOntologyBiologicalProcess	GO:0031344	regulation of cell projection organization	2.05e-07	14	148	DBN1, DCC, RUFY3, MAP1B, MBP, PTEN, CACNA1A, APC, HDAC2, IL1RAPL1, RTN4, LCN2, GSK3B, GRIN1
Drug	CID000005070	riluzole	2.14e-07	16	174	CACNA2D2, KCNC1, GMFB, SLC17A7, GABRB2, GABRB3, SLC1A2, GFAP, MAP2, NRG3, CACNB4, CACNA1B, CACNA1A, GRM3, GRIK5, GRIN2C
Pathway	P00037	Ionotropic glutamate receptor	2.67e-07	9	46	SLC1A2, CAMK2A, VAMP2, CACNA1B, CACNA1A, GRM3, GRIN1, GRIK5, GRIN2C
GeneOntologyCellularComponent	GO:0045211	postsynaptic membrane	3.39e-07	14	158	ARHGAP32, KCNMA1, KCNB1, DLG2, DLG4, GABRB2, GABRB3, NLGN2, DLGAP3, CPEB1, GRM3, GRIN1, GRIK5, GRIN2C
GeneOntologyBiologicalProcess	GO:0045664	regulation of neuron differentiation	3.96e-07	16	205	DBN1, DCC, RUFY3, YWHAG, PRPF19, CDK5R1, MAP1B, MBP, PTEN, CACNA1A, HDAC2, ATN1, IL1RAPL1, RTN4, GSK3B, GRIN1
GeneOntologyBiologicalProcess	GO:0007270	nerve-nerve synaptic transmission	4.85e-07	10	75	GABRB3, STXBP1, KIF1B, CACNB4, CACNA1A, NISCH, GRM3, TMOD2, GRIN1, GRIK5
Drug	CID000002910	cyclothiazide	5.77e-07	12	103	KCNMA1, SLC17A7, GABRB2, GABRB3, SLC1A2, GFAP, MBP, CACNA1A, FOS, GRM3, GRIK5, GRIN2C
Drug	D024505	Tocopherols	9.94e-07	10	72	DNAJC5, RAB6B, SNCB, CPLX2, CDK5R1, STXBP1, VAMP2, ARF3, GRIN1, ATP1B2
MousePheno	MP:0009745	abnormal behavioral response to xenobiotic	1.18e-06	20	207	CACNA2D2, KCNC1, EHMT2, NR4A3, MT3, DLG4, GABRB2, GABRB3, SLC1A2, GFAP, CDK5R1, SCN1A, DLGAP3, CACNB4, CACNA1B, CACNA1A, AQP4, SLC12A5, GRIN1, GRIK5
GeneOntologyCellularComponent	GO:0030424	axon	1.32e-06	16	230	KCNMA1, DCC, SNCB, GABRB3, SLC1A2, KLHL24, CDK5R1, MAP1B, SCN1A, KCNAB2, MBP, CACNA1B, APC, UHMK1, GRM3, GRIK5
MousePheno	MP:0001393	ataxia	1.71e-06	21	231	KIF1A, CACNA2D2, KCNMA1, GJA1, DNAJC5, DCC, KCNC1, B4GALNT1, DST, QKI, NLK, MAP1B, SCN1A, MBP, ATXN1, CACNB4, PTEN, CACNA1A, APLP2, GRIN1, ATP2B2
MousePheno	MP:0000947	convulsive seizures	2.11e-06	15	126	CACNA2D2, KCNC1, NR4A3, B4GALNT1, SLC1A2, TEF, QKI, SCN1A, MBP, CACNB4, PTEN, CACNA1A, SLC12A5, ATE1, GRIN1
GeneOntologyBiologicalProcess	GO:0007409	axonogenesis	3.08e-06	17	268	BAI1, KIF5C, DCC, RUFY3, NRXN1, DST, CDK5R1, MAP1B, STXBP1, MBP, CACNA1A, APC, RTN4, DCLK1, EPHA4, BCL11B, GRIN1
MousePheno	MP:0002910	abnormal excitatory postsynaptic currents	3.85e-06	12	85	SLC17A7, NRXN2, NRXN1, DLG2, CPLX2, CAMK2A, VAMP2, CACNA1A, SYT1, GRIN1, GRIK5, GRIN2C
GeneOntologyCellularComponent	GO:0033267	axon part	3.86e-06	10	96	KCNMA1, SNCB, GABRB3, SLC1A2, SCN1A, KCNAB2, MBP, CACNA1B, APC, GRIK5
GeneOntologyBiologicalProcess	GO:0007416	synapse assembly	4.06e-06	8	56	SPOCK2, NRXN2, NRXN1, MAP1B, NLGN2, CACNA1A, DNM3, GRIN1
Interaction	116538	Two-hybrid	4.47e-06	4	6	NRXN2, NRXN1, DLG2, DLG4
Pathway	MTORPATHWAY	MTORPATHWAY	4.81e-06	6	23	PTEN, PDPK1, EIF3A, EIF4A1, EIF4B, PIK3R1
GeneOntologyMolecularFunction	GO:0005516	calmodulin binding	5.42e-06	12	144	NRGN, SLC8A1, MAP2, CAMK2A, VAMP2, CACNA1A, SYT1, PDE1A, SPTBN1, GRIN1, ATP2B2, ATP2B1
MousePheno	MP:0002207	abnormal long term potentiation	6.31e-06	17	173	NRGN, DLG4, CPLX2, PRKACB, GFAP, CAMK2A, ATXN1, CACNA1B, HDAC2, EPHA4, NELL2, ARHGEF9, FOS, CPEB1, PTPRD, TMOD2, GRIN1
Interaction	HPRD:00226	Cadherin 2	6.75e-06	6	21	ARHGAP32, JUP, CREBBP, CDH11, PIK3R1, GRIN1
GeneOntologyCellularComponent	GO:0030426	growth cone	7.67e-06	9	82	DCC, RUFY3, CDK5R1, MAP1B, APC, ERC2, GSK3B, TMOD2, GRIN1
GeneOntologyBiologicalProcess	GO:0042391	regulation of membrane potential	7.91e-06	13	174	SBF2, POU3F1, KCNMA1, PEX5L, QKI, SCN1A, MBP, ATXN1, CACNB4, CACNA1A, GRIN1, GRIK5, GRIN2C
MousePheno	MP:0001491	unresponsive to tactile stimuli	9.34e-06	6	19	KIF1A, SLC17A7, DLG2, CDK5R1, MAP1B, KIF1B
Drug	D003010	Clorgyline	1.02e-05	13	158	ATRX, PHIP, DST, ZNF644, CHIC1, ZNF292, CPD, APC, TMEM106B, RGS5, SFRS2IP, AKAP9, PCMTD1
MousePheno	MP:0002912	abnormal excitatory postsynaptic potential	1.17e-05	10	65	NRGN, SLC17A7, DLG2, GFAP, CAMK2A, ATXN1, DLGAP3, CACNA1B, CACNA1A, ARHGEF9
MousePheno	MP:0002204	abnormal neurotransmitter level	1.17e-05	10	65	CACNA2D2, SLC17A7, NRXN2, NRXN1, CPLX2, STXBP1, VAMP2, CACNA1A, SYT1, ERC2
Interaction	HPRD:05818	Kinesin family member 1B	1.21e-05	5	14	YWHAG, DLG2, DLG4, KIF1B, CPEB1
MousePheno	MP:0001468	abnormal temporal memory	1.25e-05	12	95	NRGN, SLC17A7, GIT1, MAP2, CAMK2A, CREBBP, HDAC2, FOS, GSK3B, TMOD2, GRIN1, GRIN2C
Interaction	HPRD:01498	Protein kinase C alpha	1.39e-05	15	172	NRGN, GJA1, FSCN1, GMFB, YWHAG, YWHAZ, HABP4, DLG4, GFAP, STXBP1, MBP, CBL, APLP2, ATP2B2, ATP2B1
GeneOntologyBiologicalProcess	GO:0050905	neuromuscular process	1.42e-05	8	66	KCNMA1, NR4A3, SCN1A, CACNA1A, APLP2, GRIN1, ATP2B2, GRIN2C
MousePheno	MP:0003008	enhanced long term potentiation	1.49e-05	8	41	NRGN, DLG4, GFAP, CAMK2A, HDAC2, NELL2, ARHGEF9, PTPRD
MousePheno	MP:0002915	abnormal synaptic depression	1.63e-05	11	82	NRGN, KCNMA1, NRXN2, NRXN1, PRKACB, GFAP, CDK5R1, CAMK2A, SYT1, ARHGEF9, GRIN1
MousePheno	MP:0000813	abnormal hippocampus layer morphology	1.76e-05	10	68	ATRX, NR4A3, DLG4, SLC1A2, CDK5R1, MAP1B, MAP2, PTEN, HDAC2, DCLK1
MousePheno	MP:0002888	abnormal NMDA-mediated synaptic currents	1.78e-05	6	21	NRXN2, NRXN1, DLG4, DLGAP3, GRIN1, GRIN2C
GeneOntologyCellularComponent	GO:0043204	perikaryon	1.83e-05	7	51	TTLL7, PI4K2A, KLHL24, MAP1B, CACNA1A, SLC12A5, GRIK5
MousePheno	MP:0008415	abnormal neurite morphology	2.08e-05	16	170	SBF2, CACNA2D2, POU3F1, PI4K2A, SLC17A7, DST, QKI, MAP1B, MBP, CAMK2A, CACNA1A, DNM1L, DCLK1, EPHA4, FOS, PLEC
GeneOntologyMolecularFunction	GO:0030165	PDZ domain binding	2.09e-05	8	70	MPP2, GJA1, DLG2, DLG4, PTEN, ATP2B2, ATP2B1, GRIN2C
Interaction	HPRD:04199	Discs, large homolog 4	2.13e-05	11	99	BAI1, ARHGAP32, DLG2, DLG4, GNG13, NLGN2, KIF1B, GRIN1, ATP2B2, GRIK5, GRIN2C
MousePheno	MP:0004753	abnormal miniature excitatory postsynaptic currents	2.15e-05	8	43	SLC17A7, CPLX2, VAMP2, CACNA1B, CACNA1A, EPHA4, GRIN1, GRIN2C
Interaction	HPRD:09260	DAP1	2.54e-05	5	16	DLG2, DLG4, DLGAP3, APC, GRIN2C
Interaction	HPRD:01499	Protein kinase C, beta 1	2.64e-05	9	67	NRGN, GJA1, YWHAG, HABP4, GABRB2, STXBP1, PDPK1, GSK3B, GRIN1
GeneOntologyCellularComponent	GO:0043197	dendritic spine	2.76e-05	8	74	ARHGAP32, SLC1A2, CDK5R1, DLGAP3, DNM3, GRM3, GSK3B, GRIN1
GeneOntologyBiologicalProcess	GO:0016358	dendrite development	3e-05	8	73	DBN1, MAP1B, MAP2, CACNA1A, DCLK1, GSK3B, CELSR2, GRIN1
Pathway	CALCIUM_REGULATION_IN_CARDIAC_CELLS	CALCIUM_REGULATION_IN_CARDIAC_CELLS	3.05e-05	12	143	GJA1, SLC8A1, KCNB1, PRKACB, GNG13, CAMK2A, CACNA1B, CACNA1A, RGS5, ATP2B2, ATP2B1, ATP1B2
MousePheno	MP:0002062	abnormal conditioning behavior	3.09e-05	17	195	NRGN, DBN1, KCNMA1, GMFB, PRKACB, GIT1, GFAP, MAP2, CAMK2A, ATXN1, CACNA1B, HDAC2, FOS, GSK3B, TMOD2, GRIN1, GRIN2C
Interaction	HPRD:05610	Histone deacetylase 4	3.12e-05	7	39	ATRX, ANKRD11, RBBP4, YWHAG, YWHAZ, MEF2C, ZBTB16
Drug	CID000001650	dihydrokainate	3.31e-05	9	85	DGKB, SLC17A7, DLG4, SLC1A2, GFAP, FOS, GRM3, GRIK5, GRIN2C
Interaction	109161	Co-fractionation; Two-hybrid	3.55e-05	4	9	DLG2, DLG4, CAMK2A, GRIN1
Drug	CID000004054	memantine	3.63e-05	9	86	DBN1, HSPA4, SLC17A7, PPP2R4, GRM3, GSK3B, GRIN1, GRIK5, GRIN2C
GeneOntologyBiologicalProcess	GO:0050885	neuromuscular process controlling balance	3.74e-05	6	38	KCNMA1, NR4A3, CACNA1A, APLP2, ATP2B2, GRIN2C
Pathway	ps1pathway	Presenilin action in Notch and Wnt signaling	3.93e-05	7	47	NLK, CREBBP, APC, NEDD4, FOS, GSK3B, CSNK2A1
Pathway	P00039	Metabotropic glutamate receptor group III	4.54e-05	8	65	SLC17A7, SLC1A2, VAMP2, CACNA1B, CACNA1A, GRIN1, GRIK5, GRIN2C
GeneOntologyBiologicalProcess	GO:0030534	adult behavior	4.7e-05	9	100	KCNMA1, NR4A3, SLC1A2, SCN1A, ATXN1, CACNB4, CACNA1A, EPHA4, GRIN1
Drug	CID000023991	xenon	4.78e-05	9	89	NR1D2, MBP, CACNA1A, ATN1, GRM3, CYGB, ATP2B2, ATP2B1, GRIN2C
Interaction	HPRD:09553	CPEB1	5.19e-05	3	4	MAP2, KIF1B, CPEB1
Interaction	HPRD:07348	Neuroligin 2	5.19e-05	3	4	NRXN1, DLG4, NLGN2
Interaction	HPRD:02999	MAZ	5.19e-05	3	4	DCC, MAZ, CSNK2A1
GeneOntologyBiologicalProcess	GO:0070838	divalent metal ion transport	5.45e-05	12	180	CACNA2D2, GJA1, SLC8A1, CAMK2A, CACNB4, CACNA1B, CACNA1A, IL1RAPL1, CTGF, GRIN1, ATP2B2, ATP2B1
MousePheno	MP:0001405	impaired coordination	5.8e-05	20	268	SBF2, KIF5A, CACNA2D2, KCNMA1, DNAJC5, KCNC1, RORB, SLC17A7, B4GALNT1, GABRB3, DST, CPLX2, RASD2, ATXN1, KIF1B, CACNB4, CACNA1A, GRIN1, GRIN2C, ATP1B2
GeneOntologyBiologicalProcess	GO:0034330	cell junction organization	5.84e-05	8	80	GJA1, JUP, DST, NLGN2, PTEN, APC, PDPK1, PLEC
Pathway	pi3kplctrkpathway	Trk receptor signaling mediated by PI3K and PLC-gamma	6.32e-05	6	35	YWHAG, YWHAZ, CAMK2A, PDPK1, PIK3R1, GSK3B
GeneOntologyBiologicalProcess	GO:0051932	synaptic transmission, GABAergic	6.35e-05	5	26	GABRB3, STXBP1, CACNB4, CACNA1A, NISCH
GeneOntologyBiologicalProcess	GO:0007628	adult walking behavior	6.35e-05	5	26	KCNMA1, SCN1A, CACNB4, CACNA1A, EPHA4
Interaction	HPRD:11451	PTPRF interacting protein alpha 1	6.39e-05	5	19	YWHAG, GIT1, ERC2, PTPRD, PTPRS
Pathway	NOS1PATHWAY	NOS1PATHWAY	6.43e-05	5	22	DLG4, PRKACB, SYT1, GRIN1, GRIN2C
GeneOntologyMolecularFunction	GO:0017075	syntaxin-1 binding	6.64e-05	4	14	CPLX2, STXBP1, VAMP2, SYT1
GeneOntologyBiologicalProcess	GO:0051129	negative regulation of cellular component organization	6.68e-05	13	213	HSPA1B, RUFY3, EIF2C2, MAP1B, MAP2, MBP, PTEN, APC, HDAC2, RTN4, SPTBN1, GSK3B, TPR
Pathway	SIG_INSULIN_RECEPTOR_PATHWAY_IN_CARDIAC_MYOCYTES	SIG_INSULIN_RECEPTOR_PATHWAY_IN_CARDIAC_MYOCYTES	6.76e-05	7	51	CAP1, YWHAG, YWHAZ, PTEN, CBL, PIK3R1, GSK3B
MousePheno	MP:0001406	abnormal gait	7.42e-05	19	251	CACNA2D2, KCNMA1, GJA1, DCC, PI4K2A, RORB, CPLX2, QKI, MAP1B, SCN1A, ATXN1, CACNB4, NPEPPS, CACNA1A, MEF2C, EPHA4, IDS, SLC12A5, ATP2B2
Interaction	115106	Reconstituted Complex	7.5e-05	6	31	RBBP4, YWHAG, YWHAZ, MEF2C, ZBTB16, NR2C2
GeneOntologyMolecularFunction	GO:0019207	kinase regulator activity	8.16e-05	9	108	WNK1, GMFB, YWHAG, CDK5R1, TAOK1, NRG3, APC, KIDINS220, PIK3R1
GeneOntologyCellularComponent	GO:0034704	calcium channel complex	8.17e-05	5	28	CACNA2D2, PPP2R4, CACNB4, CACNA1B, CACNA1A
Interaction	108636	Reconstituted Complex; Two-hybrid	8.95e-05	4	11	CREBBP, TSC22D3, FOS, CSNK2A1
Pathway	nfat_3pathway	Role of Calcineurin-dependent NFAT signaling in lymphocytes	9.83e-05	7	54	YWHAG, YWHAZ, CREBBP, FKBP8, RCAN2, GSK3B, CSNK2A1
MousePheno	MP:0003997	tonic-clonic seizures	0.000103512	8	53	NR4A3, B4GALNT1, TEF, SCN1A, PTEN, SLC12A5, ATE1, GRIN1
GeneOntologyBiologicalProcess	GO:0008344	adult locomotory behavior	0.000106034	7	65	KCNMA1, SCN1A, ATXN1, CACNB4, CACNA1A, EPHA4, GRIN1
MousePheno	MP:0002272	abnormal nervous system electrophysiology	0.000106448	17	215	SBF2, CACNA2D2, KCNMA1, SLC17A7, GABRB3, SLC2A3, TEF, MAP1B, SCN1A, CACNB4, CACNA1B, CACNA1A, FOS, SLC12A5, PLEC, GRIN1, ATP2B2
Drug	CID000005466	hydrochloride	0.000108645	11	146	SLC17A7, GABRB2, GABRB3, SLC1A2, NR1D2, CACNA1B, KRIT1, FOS, MGAT3, GRM3, GRIK5
GeneOntologyCellularComponent	GO:0008328	ionotropic glutamate receptor complex	0.000109317	4	16	DLG4, GRIN1, GRIK5, GRIN2C
MousePheno	MP:0005316	abnormal response to tactile stimuli	0.000109528	9	68	KIF1A, SLC17A7, DLG2, DST, CDK5R1, MAP1B, KIF1B, CACNA1B, CACNA1A
GeneOntologyMolecularFunction	GO:0016247	channel regulator activity	0.00011204	7	66	WNK1, TMPRSS3, NRXN2, NRXN1, KCNAB2, NEDD4, GRM3
GeneOntologyMolecularFunction	GO:0035254	glutamate receptor binding	0.000117568	4	16	DLG4, CAMK2A, GSK3B, GRIN1
GeneOntologyCellularComponent	GO:0016604	nuclear body	0.000122876	12	201	NEAT1, DDX3X, HSPA1B, SF3B1, PRPF19, SRRM2, RBM25, CREBBP, MEF2C, ZBTB16, CPSF6, SFRS18
GeneOntologyCellularComponent	GO:0016607	nuclear speck	0.00012292	9	116	DDX3X, HSPA1B, SF3B1, PRPF19, SRRM2, RBM25, MEF2C, ZBTB16, SFRS18
Interaction	113791	Affinity Capture-Western	0.000127426	3	5	ANP32A, MAP1B, ATXN1
Interaction	HPRD:13805	KIAA0515 protein	0.000127426	3	5	EHMT2, ATXN1, ATN1
Interaction	HPRD:14681	Bcl XL binding protein v68	0.000127426	3	5	HSPA1B, YWHAG, ZBTB16
Interaction	119944	Two-hybrid	0.000127426	3	5	NRXN1, DLG2, DLG4
Interaction	HPRD:15231	RNA binding motif protein 9	0.000131774	4	12	QKI, RBM9, ATXN1, ATN1
Interaction	HPRD:09876	Centromere protein J	0.000131774	4	12	YWHAG, YWHAZ, CREBBP, ATN1
Interaction	109072	Affinity Capture-MS	0.000131774	4	12	APC, APLP2, MARK2, CSNK2A1
GeneOntologyMolecularFunction	GO:0032403	protein complex binding	0.000137035	15	295	PHIP, ACVR2B, PI4K2A, YWHAZ, AP2B1, DST, MAP1B, VAMP2, PDPK1, NISCH, ACVR1C, RTN4, CTGF, SPTBN1, PIK3R1
GeneOntologyBiologicalProcess	GO:0048168	regulation of neuronal synaptic plasticity	0.00014438	6	48	DBN1, DLG4, CAMK2A, CPEB1, GSK3B, GRIN1
MousePheno	MP:0004994	abnormal brain wave pattern	0.000149229	7	42	CACNA2D2, SLC2A3, TEF, SCN1A, CACNB4, CACNA1A, GRIN1
MousePheno	MP:0009940	abnormal hippocampus pyramidal cell morphology	0.000149229	7	42	ATRX, NR4A3, DLG4, SLC1A2, CDK5R1, PTEN, HDAC2
Pathway	WNTPATHWAY	WNTPATHWAY	0.000150316	5	26	NLK, CREBBP, APC, GSK3B, CSNK2A1
MousePheno	MP:0002862	altered righting response	0.00016563	11	105	DNAJC5, B4GALNT1, GABRB3, DST, SCN1A, CACNB4, CACNA1A, APLP2, GRIN1, ATP2B2, ATP1B2
MousePheno	MP:0001486	abnormal startle reflex	0.00016563	11	105	DNAJC5, SLC17A7, DST, SLC2A3, CACNA1B, FOS, ATE1, TMOD2, GRIN1, ATP2B2, GRIK5
MousePheno	MP:0002065	abnormal fear/anxiety-related behavior	0.000167918	16	202	EHMT2, SLC17A7, CPLX2, GIT1, SLC2A3, RASD2, MAP2, CAMK2A, DLGAP3, CACNB4, NPEPPS, CACNA1B, IDS, ARHGEF9, FOS, GRIN1
MousePheno	MP:0009956	abnormal cerebellar layer morphology	0.000167918	16	202	CACNA2D2, GJA1, PI4K2A, B4GALNT1, QKI, CDK5R1, MAP1B, MAP2, ATXN1, PTEN, CACNA1A, IL1RAPL1, DNM1L, ATP2B2, GRIN2C, ATP1B2
MousePheno	MP:0004008	abnormal GABA-mediated receptor currents	0.000174372	4	11	NRXN2, NRXN1, GABRB2, GABRB3
Interaction	HPRD:03382	Protein kinase, cAMP dependent, catalytic, alpha	0.000179129	12	146	DNAJC5, CUL5, GMFB, GFAP, MAP2, MBP, APC, PDPK1, SPTBN1, FOS, GSK3B, ATP2B1
GeneOntologyCellularComponent	GO:0019717	synaptosome	0.000180577	9	122	SNCB, SLC17A7, DLG4, VAMP2, CACNA1B, ERC2, FOS, GRIN1, GRIK5
Pathway	GSK3PATHWAY	GSK3PATHWAY	0.000181484	5	27	GJA1, APC, PDPK1, PIK3R1, GSK3B
Interaction	HPRD:03007	Synapse associated protein 97	0.000193413	8	68	MPP2, DLG2, GNG13, CAMK2A, DLGAP3, KIF1B, PTEN, ATP2B2
MousePheno	MP:0000745	tremors	0.000210806	16	206	KIF5A, CACNA2D2, POU3F1, KCNMA1, KCNC1, PI4K2A, GABRB3, DST, QKI, MAP1B, SCN1A, KCNAB2, MBP, CACNA1A, ATP2B2, ATP1B2
MousePheno	MP:0002906	increased susceptibility to pharmacologically induced seizures	0.000212451	9	74	CACNA2D2, NR4A3, MT3, SLC1A2, GFAP, CDK5R1, SCN1A, SLC12A5, GRIK5
MousePheno	MP:0004679	xiphoid process foramen	0.000213137	3	5	CREBBP, ZBTB16, GSK3B
Pathway	reelinpathway	Reelin signaling pathway	0.000217351	5	28	CDK5R1, MAP1B, CBL, PIK3R1, GSK3B
GeneOntologyMolecularFunction	GO:0022843	voltage-gated cation channel activity	0.00022619	10	151	CACNA2D2, KCNMA1, KCNC1, KCNB1, SCN1A, KCNAB2, CACNB4, CACNA1B, CACNA1A, GRIN1
GeneOntologyMolecularFunction	GO:0008187	poly-pyrimidine tract binding	0.000241296	3	8	ATXN1, CPEB2, MSI2
Pathway	PITX2PATHWAY	PITX2PATHWAY	0.0002455	4	16	MED1, CREBBP, APC, GSK3B
Interaction	108085	Affinity Capture-MS	0.000250382	3	6	CAMK2A, APC, ATP2B2
MousePheno	MP:0009357	abnormal seizure response to inducing agent	0.000280057	12	130	CACNA2D2, NR4A3, B4GALNT1, MT3, SLC1A2, GFAP, TEF, CDK5R1, SCN1A, SLC12A5, GRIN1, GRIK5
Pathway	h_PDZsPathway	Synaptic Proteins at the Synaptic Junction	0.000315995	4	17	DLG2, DLG4, SPTBN1, GRIN1
GeneOntologyCellularComponent	GO:0016580	Sin3 complex	0.000338214	3	9	RBBP4, HDAC2, CSNK2A1
Interaction	111105	Affinity Capture-Western	0.000343529	4	15	HSPA8, HSPA4, DLG4, CAMK2A
MousePheno	MP:0008226	decreased anterior commissure size	0.000361397	4	13	MAP1B, MAP2, DCLK1, ARHGAP5
GeneOntologyBiologicalProcess	GO:0048813	dendrite morphogenesis	0.000361712	5	37	CACNA1A, DCLK1, GSK3B, CELSR2, GRIN1
GeneOntologyBiologicalProcess	GO:0017157	regulation of exocytosis	0.000376288	6	57	STXBP1, VAMP2, CACNA1A, SYT1, IL1RAPL1, GRIK5
Interaction	HPRD:01872	U2AF65	0.000379973	5	27	DDX6, MAP1B, ATXN1, SFRS2IP, SRPK2
Interaction	HPRD:00286	Catenin beta	0.000381852	11	136	ARHGAP32, FSCN1, APC2, CDK5R1, CREBBP, APC, CDH11, PIK3R1, GSK3B, CSNK2A1, GRIN1
MousePheno	MP:0005277	abnormal brainstem morphology	0.000383966	6	35	KIF1B, DNM1L, DCLK1, GRIN1, ATP2B2, ATP1B2
GeneFamily	CACN	Calcium channels	0.000397869	3	15	CACNA2D2, CACNA1B, CACNA1A
Pathway	PW:0000674		0.000399901	4	18	KCNB1, STXBP1, VAMP2, CACNA1A
GeneOntologyCellularComponent	GO:0034703	cation channel complex	0.000428684	9	137	CACNA2D2, KCNMA1, KCNC1, KCNB1, PPP2R4, SCN1A, CACNB4, CACNA1B, CACNA1A
Interaction	122313	Affinity Capture-MS	0.000430493	3	7	KIF5A, KIF5C, YWHAG
Interaction	113180	Reconstituted Complex	0.000430493	3	7	PTEN, CBL, NEDD4
Interaction	108086	Reconstituted Complex	0.000430493	3	7	BAI1, DLG2, DLG4
Interaction	HPRD:03004	Calcium channel, voltage dependent, P/Q type, alpha 1A subunit	0.000430493	3	7	CACNB4, CACNA1A, SYT1
Interaction	HPRD:04062	Brain specific angiogenesis inhibitor 1	0.000430493	3	7	BAI1, PHYHIP, DLG4
Interaction	116753	Reconstituted Complex	0.000430493	3	7	YWHAG, YWHAZ, SPTBN1
Interaction	HPRD:00160	Plasma membrane Ca(2+) ATPase, type 2	0.000430493	3	7	DLG2, DLG4, ATP2B2
Interaction	HPRD:06273	Epsin 4	0.000430493	3	7	YWHAG, AP2B1, AP2A1
Interaction	HPRD:17637	Nemo like kinase	0.000430493	3	7	NLK, ATXN1, CREBBP
Interaction	HPRD:09014	HLA DR associated protein I	0.000449556	4	16	KPNA1, ANP32A, MAP1B, ATXN1
Interaction	HPRD:16199	Protein phosphatase 1A magnesium dependent alpha isoform	0.000449556	4	16	CACNA1B, CACNA1A, GRM3, PIK3R1
Interaction	HPRD:01140	Microtubule associated protein 2	0.000449556	4	16	MAP2, CPEB1, PLEC, GRIN1
Interaction	HPRD:03965	Mitogen-activated protein kinase kinase kinase 3	0.000453718	5	28	WNK1, YWHAG, YWHAZ, MARK2, ZBTB16
GeneOntologyBiologicalProcess	GO:0035249	synaptic transmission, glutamatergic	0.000464863	5	39	CACNB4, CACNA1A, GRM3, GRIN1, GRIK5
GeneOntologyCellularComponent	GO:0030666	endocytic vesicle membrane	0.000466135	5	40	AP2B1, AP2A1, DLG4, CAMK2A, SYT1
MousePheno	MP:0003990	decreased neurotransmitter release	0.000468055	5	24	CACNA2D2, NRXN2, NRXN1, VAMP2, CACNA1A
Interaction	114593	Reconstituted Complex	0.000489793	6	43	HSPA8, DLG4, GFAP, STXBP1, APLP2, NEDD4
Interaction	HPRD:00886	14-3-3 theta	0.000500636	8	78	HSPA8, SLC8A1, YWHAG, CDK14, CBL, PDPK1, CSNK2A1, TPR
MousePheno	MP:0004077	abnormal striatum morphology	0.000517152	7	51	SNCB, DLG4, QKI, CDK5R1, DLGAP3, DCLK1, GRIN1
GeneOntologyCellularComponent	GO:0045178	basal part of cell	0.000523846	5	41	JUP, DST, SLC23A2, MARK2, PLEC
GeneOntologyBiologicalProcess	GO:0051259	protein oligomerization	0.000533646	12	230	SBF2, KCNMA1, GJA1, KCNB1, JUP, NRXN1, KCNAB2, PFKP, OGT, SYT1, AQP4, LCN2
MousePheno	MP:0001513	limb grasping	0.000535125	11	120	SBF2, CACNA2D2, DNAJC5, PI4K2A, RORB, GABRB3, DST, ATXN1, CACNA1A, EPHA4, ATP2B2
GeneOntologyBiologicalProcess	GO:0007214	gamma-aminobutyric acid signaling pathway	0.000535497	4	23	GABRB2, GABRB3, CACNB4, CACNA1A
Pathway	pi3kciaktpathway	Class I PI3K signaling events mediated by Akt	0.000557912	5	34	KPNA1, YWHAG, YWHAZ, PDPK1, GSK3B
MousePheno	MP:0003216	absence seizures	0.000571828	5	25	GABRB3, TEF, SCN1A, PTEN, CACNA1A
GeneFamily	KIF	Kinesins	0.000573816	4	39	KIF1A, KIF5A, KIF5C, KIF1B
MousePheno	MP:0008026	abnormal brain white matter morphology	0.000591461	12	141	DCC, GFAP, QKI, CDK5R1, MAP1B, MAP2, KIF1B, DNM1L, DCLK1, EPHA4, ARHGAP5, NDST1
Pathway	hsa05213	Endometrial cancer	0.000596787	6	52	APC2, PTEN, APC, PDPK1, PIK3R1, GSK3B
Pathway	kitpathway	Signaling events mediated by Stem cell factor receptor (c-Kit)	0.000596787	6	52	PTEN, CREBBP, CBL, PDPK1, PIK3R1, GSK3B
Pathway	IGF1MTORPATHWAY	IGF1MTORPATHWAY	0.00061347	4	20	PTEN, PDPK1, PIK3R1, GSK3B
Interaction	HPRD:08950	Histone deacetylase 3	0.000627883	7	62	HSPA8, ANKRD11, HSPA4, RBBP4, CREBBP, KLF6, CSNK2A1
Pathway	botulinumtoxinpathway	Effects of Botulinum toxin	0.0006296	3	9	STXBP1, VAMP2, SYT1
GeneOntologyBiologicalProcess	GO:0006887	exocytosis	0.000641155	10	171	PEX5L, PI4K2A, YWHAZ, CPLX2, STXBP1, VAMP2, CACNA1A, SYT1, IL1RAPL1, GRIK5
Interaction	HPRD:00277	Casein kinase II, alpha 1	0.000649681	12	168	GMFB, PPP2R4, MAZ, PTEN, CREBBP, OGT, HDAC2, MEF2C, AQP4, SPTBN1, FOS, CSNK2A1
GeneOntologyBiologicalProcess	GO:0031345	negative regulation of cell projection organization	0.000659213	5	42	RUFY3, MBP, HDAC2, RTN4, GSK3B
MousePheno	MP:0002885	abnormal AMPA-mediated synaptic currents	0.000660024	4	15	NRXN2, NRXN1, DLG4, GRIN1
MousePheno	MP:0005292	improved glucose tolerance	0.000661496	9	86	KCNB1, CACNA1B, PPM1L, CREBBP, CBL, PDPK1, MARK2, PIK3R1, GSK3B
Pathway	NFATPATHWAY	NFATPATHWAY	0.000661859	6	53	PRKACB, CREBBP, SYT1, MEF2C, PIK3R1, GSK3B
Interaction	109160	Affinity Capture-Western; Reconstituted Complex	0.000676737	3	8	DLG2, DLG4, GRIN1
Interaction	108480	Affinity Capture-Western	0.000676737	3	8	DCC, DLG4, CBL
Interaction	HPRD:04342	Kinesin family member 1C	0.000676737	3	8	YWHAG, YWHAZ, CSNK2A1
Interaction	HPRD:02753	EMK1	0.000676737	3	8	YWHAZ, MARK2, GSK3B
GeneOntologyBiologicalProcess	GO:0060004	reflex	0.000698966	3	11	KCNMA1, NR4A3, CACNA1A
Interaction	HPRD:01142	Microtubule associated protein tau	0.000709246	6	46	HSPA8, YWHAZ, STXBP1, CAMK2A, OGT, GSK3B
MousePheno	MP:0004807	abnormal paired-pulse inhibition	0.000715313	3	7	NRXN2, NRXN1, CACNA1A
MousePheno	MP:0002807	abnormal eye blink conditioning behavior	0.000715313	3	7	KCNMA1, GMFB, GFAP
Pathway	hsa04742	Taste transduction	0.000732298	6	54	KCNB1, PRKACB, GNG13, CACNA1B, CACNA1A, PDE1A
Interaction	HPRD:03402	Ribosomal S6 kinase 1	0.00074025	5	31	GMFB, NR4A3, CREBBP, PDPK1, FOS
GeneOntologyBiologicalProcess	GO:0018107	peptidyl-threonine phosphorylation	0.000745055	4	25	NLK, MAP2, PDPK1, SBK1
GeneOntologyBiologicalProcess	GO:0060079	regulation of excitatory postsynaptic membrane potential	0.000745055	4	25	ATXN1, GRIN1, GRIK5, GRIN2C
GeneOntologyCellularComponent	GO:0034747	Axin-APC-beta-catenin-GSK3B complex	0.000791095	2	3	APC, GSK3B
GeneOntologyCellularComponent	GO:0030659	cytoplasmic vesicle membrane	0.000798958	12	247	ATP6V0A1, GJA1, PI4K2A, SLC17A7, AP2B1, AP2A1, DLG4, SLC2A3, CAMK2A, VAMP2, KIF1B, SYT1
GeneOntologyBiologicalProcess	GO:0046928	regulation of neurotransmitter secretion	0.000818898	5	44	STXBP1, CAMK2A, CACNA1B, CACNA1A, GRIK5
GeneOntologyMolecularFunction	GO:0016527	brain-specific angiogenesis inhibitor activity	0.000821456	2	3	BAI1, BAI2
Interaction	HPRD:04015	C-terminal binding protein 1	0.000860569	5	32	ZEB2, KLF12, CREBBP, APC, HDAC2
MousePheno	MP:0004792	abnormal synaptic vesicle number	0.000860767	4	16	KIF1A, SLC17A7, CAMK2A, KIF1B
GeneOntologyBiologicalProcess	GO:0016079	synaptic vesicle exocytosis	0.000868978	4	26	CPLX2, STXBP1, VAMP2, GRIK5
Pathway	PTDINSPATHWAY	PTDINSPATHWAY	0.000897426	4	22	AP2A1, PFKP, PDPK1, GSK3B
Interaction	HPRD:02372	GATA binding protein 1	0.000905269	4	19	MED1, HSPA4, CREBBP, ZBTB16
Interaction	HPRD:01502	Protein kinase C, gamma	0.000998002	6	49	NRGN, GJA1, YWHAG, HABP4, STXBP1, GRIN1
Pathway	h_eif4Pathway	Regulation of eIF4e and p70 S6 Kinase	0.00106935	4	23	PTEN, PDPK1, EIF4A1, PIK3R1
Interaction	HPRD:02549	Microtubule associated protein 1A	0.00111069	4	20	KCNMA1, DLG2, DLG4, MAP1B
Interaction	HPRD:15926	Glutamate receptor, ionotropic, N-methyl D-aspartate 1	0.00111196	6	50	DLG2, DLG4, MAP2, CAMK2A, AKAP9, GRIN1
MousePheno	MP:0001504	abnormal posture	0.00114293	13	173	SBF2, KIF5A, DNAJC5, NR4A3, SLC17A7, DST, CPLX2, MAP1B, SCN1A, CACNB4, CACNA1A, SLC12A5, ATP2B2
MousePheno	MP:0001525	impaired balance	0.001156	14	195	KIF1A, KCNMA1, KCNC1, GMFB, NR4A3, GABRB3, DST, SCN1A, CACNB4, PTEN, CACNA1A, APLP2, ATP2B2, GRIN2C
MousePheno	MP:0000812	abnormal dentate gyrus morphology	0.00116269	8	75	ATRX, GJA1, GFAP, CDK5R1, MAP1B, PTEN, HDAC2, DCLK1
MousePheno	MP:0000781	decreased corpus callosum size	0.00116646	5	29	GFAP, CDK5R1, MAP1B, DCLK1, ARHGAP5
GeneOntologyMolecularFunction	GO:0047485	protein N-terminus binding	0.00119213	7	97	HSPA1B, KCNB1, SRRM2, STXBP1, PLEC, CSNK2A1, GRIN2C
MousePheno	MP:0008220	abnormal ventral commissure morphology	0.00119637	6	43	MAP1B, MAP2, DCLK1, EPHA4, ARHGAP5, NDST1
Interaction	HPRD:01796	Transcription factor Sp1	0.00120654	8	89	HSPA8, RBBP4, OGT, HDAC2, MEF2C, KLF6, ZBTB16, CSNK2A1
MousePheno	MP:0001463	abnormal spatial learning	0.00122194	12	153	NRGN, DLG4, CPLX2, CDK5R1, CAMK2A, ATXN1, CACNA1B, ARHGEF9, FOS, PTPRD, TMOD2, GRIN1
GeneOntologyBiologicalProcess	GO:0006576	cellular biogenic amine metabolic process	0.00123915	8	125	CHKA, MED1, SNCB, ETNK1, CACNA1A, SULT1A1, TTR, ATP2B2
Interaction	HPRD:02177	Synapse-associated protein 102	0.00130937	5	35	DLG4, DLGAP3, KIF1B, GRIN1, GRIN2C
GeneOntologyBiologicalProcess	GO:0030203	glycosaminoglycan metabolic process	0.00131356	6	72	IMPAD1, SPOCK2, HABP4, PGLYRP1, IDS, NDST1
GeneOntologyBiologicalProcess	GO:0050770	regulation of axonogenesis	0.00131356	6	72	RUFY3, MAP1B, MBP, CACNA1A, RTN4, GRIN1
GeneOntologyBiologicalProcess	GO:0030900	forebrain development	0.00132233	10	188	ATRX, POU3F1, ZEB2, SLC1A2, HDAC2, APLP2, DCLK1, CX3CR1, NDST1, GRIN1
Pathway	hsa04010	MAPK signaling pathway	0.00134134	14	275	HSPB1, HSPA8, CACNA2D2, HSPA1B, PRKACB, NLK, TAOK1, CACNB4, CACNA1B, CACNA1A, MEF2C, ACVR1C, FOS, RASGRP1
Interaction	HPRD:01819	c-Src	0.00135826	13	208	ARHGAP32, GJA1, ANKRD11, KCNB1, JUP, YWHAG, DLG4, GIT1, GFAP, PPP2R4, CBL, PDPK1, PIK3R1
MousePheno	MP:0001458	abnormal object recognition memory	0.00136817	5	30	SLC17A7, CAMK2A, CREBBP, RCAN2, GRIN1
GeneOntologyBiologicalProcess	GO:0021700	developmental maturation	0.00137213	8	127	KCNMA1, GJA1, DLG2, DLG4, MAP1B, STXBP1, CACNA1A, GRIN1
GeneOntologyCellularComponent	GO:0043198	dendritic shaft	0.00137453	4	30	SLC1A2, MAP2, CACNA1B, GSK3B
MousePheno	MP:0002945	abnormal inhibitory postsynaptic currents	0.001394	7	60	NRXN2, CPLX2, CACNA1B, SYT1, ERC2, IL1RAPL1, ARHGEF9
Interaction	114211	Affinity Capture-Western	0.00139993	3	10	EIF3A, EIF4A1, EIF4B
Interaction	111700	Two-hybrid	0.00139993	3	10	PTEN, NEDD4, CSNK2A1
Interaction	HPRD:02409	PCTAIRE protein kinase 1	0.00139993	3	10	YWHAG, YWHAZ, CDK5R1
Interaction	HPRD:09018	Dual-specificity tyrosine phosphorylation regulated kinase 1A	0.00139993	3	10	PHYHIP, YWHAG, SF3B1
GeneOntologyCellularComponent	GO:0008021	synaptic vesicle	0.00143472	7	102	PI4K2A, SLC17A7, MT3, SLC2A3, VAMP2, SYT1, GRIN1
GeneOntologyCellularComponent	GO:0030672	synaptic vesicle membrane	0.00143752	5	51	PI4K2A, SLC17A7, SLC2A3, VAMP2, SYT1
GeneOntologyMolecularFunction	GO:0015085	calcium ion transmembrane transporter activity	0.00145611	3	14	SLC8A1, ATP2B2, ATP2B1
GeneOntologyMolecularFunction	GO:0008066	glutamate receptor activity	0.0014732	4	30	GRM3, GRIN1, GRIK5, GRIN2C
Interaction	HPRD:03333	Ataxin 1	0.00147965	11	160	ARHGAP32, ANP32A, YWHAZ, NLK, RBM9, KCNAB2, MBP, ATXN1, BAT2, DZIP3, PUM1
Pathway	hsa05210	Colorectal cancer	0.00151481	7	84	DCC, APC2, APC, ACVR1C, FOS, PIK3R1, GSK3B
MousePheno	MP:0000878	abnormal Purkinje cell number	0.00153791	7	61	CACNA2D2, PI4K2A, B4GALNT1, ATXN1, PTEN, DNM1L, ATP2B2
GeneOntologyCellularComponent	GO:0060198	clathrin sculpted vesicle	0.00156507	2	4	VAMP2, SYT1
Interaction	111564	Biochemical Activity	0.00161564	4	22	GJA1, DLG4, GABRB3, GSK3B
GeneOntologyMolecularFunction	GO:0005519	cytoskeletal regulatory protein binding	0.0016248	2	4	MAP1B, MAP2
GeneOntologyMolecularFunction	GO:0004305	ethanolamine kinase activity	0.0016248	2	4	CHKA, ETNK1
Interaction	HPRD:11891	Neural epidermal growth factor like 2	0.00165647	2	3	ATN1, NELL2
Interaction	124648	Affinity Capture-MS	0.00165647	2	3	YWHAG, YWHAZ
Interaction	111355	Affinity Capture-MS	0.00165647	2	3	MAP2, PLEC
Interaction	120254	Two-hybrid	0.00165647	2	3	DLG2, DLG4
Interaction	HPRD:17098	HECT domain containing 1	0.00165647	2	3	HECTD1, YWHAG
Interaction	HPRD:15641	Ubiquitin specific protease 54	0.00165647	2	3	ATXN1, ATN1
Interaction	129277	Two-hybrid	0.00165647	2	3	BAI1, PTEN
Interaction	128154	Two-hybrid	0.00165647	2	3	HSPA1B, ZBTB16
Interaction	HPRD:06230	Pumilio homolog 1	0.00165647	2	3	ATXN1, PUM1
Interaction	109958	Affinity Capture-Western; Two-hybrid	0.00165647	2	3	KCNC1, KCNB1
Interaction	121839	Two-hybrid	0.00165647	2	3	DLG4, DLGAP3
Interaction	HPRD:07543	TRAP150	0.00165647	2	3	YWHAG, THRAP3
Interaction	110320	Biochemical Activity	0.00165647	2	3	DCC, CSNK2A1
Interaction	HPRD:16078	Piccolo	0.00165647	2	3	GIT1, ERC2
Interaction	HPRD:03762	Clathrin adaptor complex AP2, sigma subunit	0.00165647	2	3	AP2B1, AP2A1
Interaction	HPRD:09662	DNA damage inducible transcript 4	0.00165647	2	3	HSPA4, DDIT4
Interaction	108084	Affinity Capture-Western	0.00165647	2	3	DLG2, ATP2B2
Interaction	109162	Affinity Capture-Western; Reconstituted Complex	0.00165647	2	3	DLG4, GRIN2C
[truncated: 29 more rows]
