# Supplementary material for: Genetic Dissection of Acute Ethanol Responsive Gene Networks in Prefrontal Cortex: Functional and Mechanistic Implications
Source: PLoS One. 2012 Apr 12;7(4):e33575. doi: 10.1371/journal.pone.0033575 (PMC3325236; doi:10.1371/journal.pone.0033575)
Supplement: Table S5 — Expression QTL analysis of PFC paraclique networks. Peak QTL positions and significance are indicated for genes from saline (A) versus S-score (B) paraclique analyses. (XLS) [file pone.0033575.s012.xls]

## Sheet: Sal
Table S5a: PFC Saline Paraclique Networks Expression QTL
ProbeSetID	Symbol	Chr	Mb	QTL Chr	QTL Mb	QTL Marker	LRS	p-value
1415670_at	Copg	6	87.8597	16	10.5091	rs4161101	14.3098	0.17
1415671_at	Atp6v0d1	8	108.049	7	45.4563	rs13479226	22.5787	0.015
1415685_at	Mtif2	11	29.4424	11	24.5727	rs3677232	42.455	0.00015625
1415694_at	Wars	12	110.099	12	108.001	rs13481636	103.275	1e-06
1415702_a_at	Ctbp1	5	33.5905	14	118.847	rs6265743	13.6177	0.255
1415703_at	Huwe1	X	148.367	2	160.461	rs13476878	16.4942	0.079
1415711_at	Arfgef1	18	22.1227	7	142.272	rs13479566	11.0086	0.5
1415714_a_at	Ry1	6	86.6309	16	69.1723	rs4199044	9.76136	0.444
1415718_at	Sap30l	11	57.6195	11	47.9608	rs13481014	19.2886	0.05
1415721_a_at	Nat15	16	3.90417	15	45.1075	rs13482547	12.5775	0.373
1415723_at	Eif5	12	112.784	12	113.706	rs4229611	25.2249	0.002
1415724_a_at	Cdc42	4	136.876	11	8.73673	rs3714397	13.2088	0.169
1415729_at	Pdpk1	17	24.2107	7	30.1445	rs8261944	23.1828	0.014
1415732_at	Bat5	17	35.2389	7	30.1445	rs8261944	12.1585	0.356
1415739_at	3100004P22Rik	7	31.4261	2	160.461	rs13476878	12.3341	0.418
1415751_at	Hp1bp3	4	137.798	4	135.947	rs13478002	40.6602	1.32e-05
1415753_at	D10Bwg1364e	10	80.0465	15	45.1075	rs13482547	11.8629	0.466
1415769_at	Itch	2	155.052	6	95.039	rs13478906	15.7169	0.064
1415781_a_at	Sumo2	11	115.385	X	69.2812	DXMit1	14.9759	0.085
1415784_at	Vps35	8	87.808	7	34.4076	rs6239372	12.3618	0.326
1415789_a_at	LOC665689	11	16.5352	7	45.4563	rs13479226	19.3079	0.035
1415791_at	Rnf34	5	123.318	7	24.6467	rs13479153	14.1723	0.063
1415792_at	Rbck1	2	152.142	13	54.8887	rs13481817	16.6556	0.038
1415794_a_at	Spin	11	51.1347	10	101.805	rs13480734	11.0215	0.575
1415804_at	Cx3cl1	8	97.3044	7	24.6467	rs13479153	14.0385	0.201
1415814_at	Atp6v1b2	8	71.637	6	95.039	rs13478906	12.854	0.351
1415819_a_at	Ppp2r1a	17	21.0996	13	54.8887	rs13481817	11.9783	0.466
1415827_a_at	D3Ucla1	3	58.3261	6	95.039	rs13478906	10.8941	0.376
1415829_at	Lbr	1	183.746	12	35.7064	gnf12.033.545	9.16813	0.387
1415838_at	Tde2	10	57.2363	7	30.1445	rs8261944	11.7984	0.456
1415841_at	Dncic2	2	71.1008	7	45.4563	rs13479226	19.513	0.033
1415869_a_at	Trim28	7	13.6159	7	15.6199	rs6295100	12.5781	0.422
1415876_a_at	Rps26	10	128.062	2	160.461	rs13476878	12.1778	0.355
1415879_a_at	Rplp2	12	76.7321	7	18.8563	D7Mit57	14.0087	0.272
1415904_at	Lpl	8	71.4303	8	71.8112	rs8253516	38.3975	2e-06
1415908_at	Tspyl1	10	34.0041	12	35.7064	gnf12.033.545	9.23714	0.586
1415919_at	Npdc1	2	25.2644	7	30.1445	rs8261944	16.3876	0.111
1415946_at	Pigq	17	26.0636	11	4.40873	rs3659787	18.3636	0.056
1415956_a_at	Pctk1	X	20.2739	7	18.8563	D7Mit57	15.9533	0.128
1415957_a_at	Rrp1	10	77.8654	10	120.097	rs6197175	15.77	0.156
1415963_at	Hnrph2	X	131.141	11	8.73673	rs3714397	10.3179	0.615
1415974_at	Map2k2	10	80.5838	7	15.6199	rs6295100	10.9579	0.604
1415981_at	Herpud2	9	24.9126	16	78.0159	rs4207980	15.0134	0.118
1416013_at	Pld3	7	28.3173	7	18.8563	D7Mit57	11.329	0.527
1416035_at	Hif1a	12	75.048	7	26.7766	rs13479163	13.204	0.274
1416048_at	Phc2	4	128.43	15	45.1075	rs13482547	17.5424	0.074
1416053_at	Lrrn1	6	107.52	12	82.5076	rs6170344	10.9409	0.511
1416064_a_at	Hspa5	2	34.6316	12	85.4216	rs13481566	10.8639	0.601
1416065_a_at	Ankrd10	8	11.6116	1	73.1444	rs13475920	10.3316	0.453
1416074_a_at	Rpl28	7	4.74493	7	30.1445	rs8261944	22.1308	0.018
1416098_at	Syngr3	17	24.8223	17	23.9217	rs3023864	13.3678	0.198
1416108_a_at	Tmed3	9	89.5942	11	47.9608	rs13481014	12.4182	0.375
1416113_at	Fkbp8	8	73.0584	7	30.1445	rs8261944	13.674	0.277
1416119_at	Txn1	4	57.9567	14	118.847	rs6265743	11.2103	0.507
1416134_at	Aplp1	7	31.2203	7	30.1445	rs8261944	16.5628	0.097
1416141_a_at	Rps6	4	78.9741	1	73.1444	rs13475920	9.57456	0.619
1416144_a_at	Dhx15	5	52.5415	11	8.73673	rs3714397	14.9084	0.136
1416156_at	Vcl	14	21.8523	14	6.81143	rs3710916	10.1426	0.623
1416166_a_at	Prdx4	X	151.758	16	91.559	rs4219239	10.4232	0.628
1416175_a_at	Vdac3	8	23.6876	7	35.0486	rs13479188	9.87865	0.605
1416189_a_at	Sec61a1	6	88.4536	7	111.466	rs13479460	11.247	0.402
1416197_at	Snrp1c	17	27.9821	1	173.062	rs8258245	31.3739	0.000666667
1416201_at	Crk	11	75.5183	7	30.1445	rs8261944	10.5769	0.506
1416202_at	Bcap37	6	124.666	11	47.9608	rs13481014	13.657	0.244
1416208_at	Usp14	18	9.99607	7	30.1445	rs8261944	18.2885	0.025
1416212_at	Magoh	4	107.552	12	103.433	rs13481620	9.82215	0.603
1416219_at	Rpl19	11	97.8897	11	4.40873	rs3659787	18.2049	0.056
1416235_at	Lrrc59	11	94.5047	11	50.9507	rs13481021	13.7474	0.257
1416246_a_at	Coro1a	7	133.843	16	41.6072	rs3663871	15.3347	0.148
1416247_at	Dctn3	4	41.662	4	41.2142	rs6232550	51.8202	2e-06
1416262_at	Tmem19	10	114.779	7	34.4076	rs6239372	11.9564	0.381
1416279_at	Ap1b1	11	4.942	7	15.6199	rs6295100	16.4097	0.084
1416327_at	Ufc1	1	173.219	1	173.062	rs8258245	29.6963	0.000125
1416331_a_at	Nfe2l1	11	96.6789	7	15.6199	rs6295100	12.504	0.267
1416343_a_at	Lamp2	X	35.7774	11	8.73673	rs3714397	19.5256	0.013
1416348_at	Men1	19	6.3397	15	51.798	rs13459191	12.7317	0.271
1416364_at	Hsp90ab1	17	45.7049	7	18.8563	D7Mit57	16.638	0.131
1416365_at	Hsp90ab1	17	45.7075	15	45.1075	rs13482547	11.514	0.51
1416367_at	1110001J03Rik	6	38.4849	11	47.9608	rs13481014	11.9393	0.41
1416381_a_at	Prdx5	19	6.98158	16	69.1723	rs4199044	15.1098	0.122
1416384_a_at	Cope	8	72.8355	8	72.7366	rs13460430	30.5318	1.5e-05
1416394_at	Bag1	4	40.8835	1	13.3682	rs3655978	11.8846	0.307
1416418_at	Gabarapl1	6	129.492	12	35.7064	gnf12.033.545	10.6653	0.499
1416426_at	Rab5a	17	53.6464	7	30.1445	rs8261944	11.3675	0.445
1416438_at	Siahbp1	15	75.9008	11	4.40873	rs3659787	14.3852	0.218
1416446_at	Tmem30a	9	79.6169	6	90.3235	rs3661039	10.5044	0.327
1416447_at	Tmem30a	9	79.6176	1	73.1444	rs13475920	10.2525	0.234
1416461_at	Gpiap1	2	103.605	7	81.4087	rs3656205	11.3388	0.465
1416463_at	Gpiap1	2	103.605	7	26.7766	rs13479163	12.5838	0.401
1416467_at	Ddx3x	X	12.8683	7	30.1445	rs8261944	13.9241	0.222
1416473_a_at	Nope	9	64.9856	11	11.0711	rs3023249	15.9732	0.138
1416474_at	Nope	9	64.9852	7	34.4076	rs6239372	11.5307	0.469
1416482_at	Ttc3	16	94.6648	7	81.4087	rs3656205	12.323	0.337
1416491_at	Numbl	7	28.0666	7	30.1445	rs8261944	17.9257	0.041
1416500_at	Sacm1l	9	123.501	11	22.9284	rs6283329	13.4567	0.235
1416509_at	Tm9sf3	19	41.2884	7	26.7766	rs13479163	18.8258	0.029
1416519_at	Rpl36	17	56.7533	11	47.9608	rs13481014	15.507	0.127
1416521_at	Sepw1	7	16.5027	15	28.9905	rs3702361	14.5033	0.149
1416522_a_at	Grcc10	6	124.689	11	22.9284	rs6283329	11.4416	0.433
1416524_at	Spop	11	95.3537	7	26.7766	rs13479163	17.7271	0.047
1416533_at	Egln2	7	27.9438	7	18.8563	D7Mit57	14.4846	0.191
1416540_at	Hgs	11	120.345	7	30.1445	rs8261944	27.9509	0.003
1416563_at	Ctps	4	120.213	7	34.4076	rs6239372	13.9635	0.205
1416566_at	Strap	6	137.699	14	118.847	rs6265743	12.9339	0.317
1416568_a_at	Acin1	14	55.263	11	90.6192	rs13481156	10.8647	0.616
1416588_at	Ptprn	1	75.2438	7	24.6467	rs13479153	14.4561	0.111
1416595_at	Mrps22	9	98.493	12	99.9811	rs13481611	12.5597	0.328
1416603_at	Rpl22	4	151.701	7	30.1445	rs8261944	12.5496	0.372
1416607_at	4931406C07Rik	9	15.0879	7	30.4293	rs8251849	11.8128	0.188
1416614_at	Cri1	2	125.5	18	70.9106	gnf18.069.064	11.7136	0.434
1416618_at	Ppox	1	173.207	1	173.062	rs8258245	43.5273	0.000117021
1416648_at	Dnchc1	12	111.904	1	82.7835	rs13475954	10.5818	0.557
1416657_at	Akt1	12	113.892	7	30.1445	rs8261944	14.7792	0.16
1416659_at	Eif3s10	19	60.8371	6	77.4513	rs3663024	19.1239	0.047
1416699_at	Rip5	2	156.698	16	67.8069	rs3695481	11.7722	0.467
1416719_a_at	Rps10	17	27.7712	7	30.1445	rs8261944	13.3589	0.318
1416728_at	Csnk2b	17	35.2546	11	47.9608	rs13481014	11.6608	0.43
1416731_at	Top2b	14	17.2628	7	30.1445	rs8261944	13.588	0.308
1416732_at	Top2b	14	17.2491	7	30.1445	rs8261944	15.3868	0.149
1416739_a_at	Brap	5	122.135	1	21.6236	rs6253968	15.39	0.156
1416742_at	Cfdp1	8	114.292	16	84.9707	rs4212088	11.0521	0.556
1416755_at	Dnajb1	8	86.1353	12	102.821	rs13481617	10.9965	0.485
1416790_a_at	Tdg	10	82.1129	6	95.039	rs13478906	18.8331	0.051
1416792_at	Ppm1g	5	31.5051	15	45.1075	rs13482547	13.9828	0.245
1416793_at	Arl6ip2	17	80.2485	7	26.7766	rs13479163	16.6007	0.083
1416794_at	Arl6ip2	17	80.252	7	26.7766	rs13479163	11.5113	0.51
1416799_at	Trpm7	2	126.618	1	73.1444	rs13475920	11.5527	0.443
1416807_at	Rpl36a	X	131.12	11	47.9608	rs13481014	21.0326	0.022
1416826_a_at	Usp49	17	47.761	11	8.73673	rs3714397	11.6266	0.316
1416837_at	Bax	7	52.7188	14	118.847	rs6265743	17.3931	0.052
1416845_at	Hspa5bp1	19	10.9325	15	28.9905	rs3702361	13.3262	0.258
1416853_at	Ncdn	4	126.421	7	35.0486	rs13479188	17.821	0.045
1416858_a_at	Fkbp3	12	66.1635	4	104.787	rs13477919	11.4214	0.51
1416862_at	Stam	2	14.0694	7	26.7766	rs13479163	17.0727	0.035
1416863_at	Abhd8	8	73.9808	15	45.1075	rs13482547	11.0665	0.553
1416877_a_at	Mrpl51	6	125.143	16	70.0774	rs4199410	12.004	0.336
1416883_at	Clptm1	7	20.2187	7	30.1445	rs8261944	16.8896	0.029
1416894_at	Hspbp1	7	4.61237	2	160.461	rs13476878	17.5963	0.07
1416903_at	Nucb1	7	52.7485	7	45.4563	rs13479226	20.8495	0.024
1416904_at	Mbnl1	3	60.4328	11	19.6458	D11Mit79	18.5744	0.027
1416911_a_at	Strf2	4	123.413	7	111.466	rs13479460	11.8287	0.318
1416912_at	C1orf108	4	123.413	12	85.4216	rs13481566	13.2218	0.292
1416924_at	Bri3	5	145.017	14	118.847	rs6265743	12.4491	0.378
1416928_at	Rbm12	2	155.921	7	30.1445	rs8261944	9.54232	0.597
1416934_at	Mtm1	X	68.5679	1	165.222	rs4222763	10.8051	0.6
1416936_at	Aatk	11	119.869	1	20.7694	rs6404446	10.654	0.468
1416948_at	Mrpl23	7	149.721	7	30.1445	rs8261944	14.2773	0.229
1416960_at	B3gat3	19	9.00078	7	18.8563	D7Mit57	20.6755	0.018
1416965_at	Pcsk1n	X	7.49956	7	30.1445	rs8261944	17.2087	0.077
1416986_a_at	Sirpa	2	129.444	7	24.6467	rs13479153	11.7578	0.46
1417007_a_at	Vps4b	1	108.668	7	30.1445	rs8261944	11.7962	0.404
1417026_at	Pfdn1	18	36.5641	2	160.461	rs13476878	10.5195	0.61
1417050_at	C1qtnf4	2	90.7301	7	15.6199	rs6295100	13.3444	0.293
1417055_at	Sf3b14	12	4.83241	12	103.433	rs13481620	10.6274	0.582
1417064_at	Jagn1	6	113.398	12	31.4696	rs6225272	10.4166	0.465
1417069_a_at	Gmfb	14	47.43	11	8.73673	rs3714397	12.85	0.364
1417073_a_at	Qk	17	10.4032	11	8.73673	rs3714397	16.9362	0.027
1417091_at	Chuk	19	44.1481	12	35.7064	gnf12.033.545	10.563	0.53
1417134_at	Srpk2	5	23.0121	11	8.73673	rs3714397	15.6107	0.112
1417135_at	Srpk2	5	23.0338	5	22.7227	gnf05.017.151	14.7811	0.078
1417147_at	B230317C12Rik	2	26.4914	1	21.6236	rs6253968	11.3127	0.538
1417151_a_at	Ntsr2	12	16.6665	12	16.8539	rs6180964	33.8728	6.06e-05
1417158_at	Zxdc	6	90.3326	10	27.6975	gnf10.025.923	12.7591	0.2
1417211_a_at	1110032A03Rik	9	50.5723	9	45.9883	rs13480172	35.4563	0.000243902
1417222_a_at	2310075C12Rik	9	7.79391	16	89.7741	rs4217061	10.4535	0.549
1417240_at	Zyx	6	42.3074	7	30.1445	rs8261944	16.0645	0.095
1417254_at	Spata5	3	37.3635	7	30.4293	rs8251849	10.9152	0.516
1417263_at	Ptgs2	1	151.953	1	147.306	rs6202860	49.1188	7e-06
1417269_at	Cdk9	2	32.563	16	38.2971	rs4151928	13.2997	0.273
1417279_at	Itpr1	6	108.5	7	81.4087	rs3656205	14.511	0.196
1417286_at	Ndufa5	6	24.4688	2	160.461	rs13476878	12.731	0.221
1417305_at	Apeg1	1	75.4006	7	18.8563	D7Mit57	12.9047	0.34
1417307_at	Dmd	X	82.4492	7	30.1445	rs8261944	15.8523	0.142
1417319_at	Pvrl3	16	46.4474	X	67.7016	rs3157124	12.8457	0.181
1417320_at	Grpel1	5	36.8138	12	99.9811	rs13481611	13.9462	0.208
1417330_at	Slc23a2	2	131.882	7	81.4087	rs3656205	13.1934	0.244
1417339_a_at	Dnclc1	5	115.749	18	70.9106	gnf18.069.064	14.8296	0.205
1417356_at	Peg3	7	6.65764	7	83.7587	rs13479374	12.9728	0.343
1417361_at	Asb3	11	30.985	11	24.5727	rs3677232	38.1778	0.000208333
1417372_a_at	Peli1	11	21.0488	11	8.73673	rs3714397	10.1412	0.582
1417384_at	Entpd5	12	85.7154	7	30.1445	rs8261944	12.7395	0.324
1417385_at	Npepps	11	97.0683	5	20.7593	rs6256752	11.4048	0.415
1417388_at	Bex2	X	132.601	1	173.062	rs8258245	46.3336	3e-06
1417390_at	Xab1	5	31.8132	7	26.7766	rs13479163	13.9257	0.125
1417423_at	Grina	15	76.0798	7	30.1445	rs8261944	18.1777	0.046
1417424_at	Ier3ip1	18	77.1798	18	70.5928	rs13483427	10.9264	0.504
1417427_at	Rnaseh2c	19	5.602	1	173.062	rs8258245	35.1343	8.85e-05
1417454_at	Cul4b	X	35.8848	7	26.7766	rs13479163	13.4516	0.314
1417468_at	Nit1	1	173.272	1	172.887	rs8242852	26.1654	0.000166667
1417474_at	1500035H01Rik	9	44.5977	9	41.2419	D9Mit227	40.0379	2.44e-05
1417481_at	Ramp1	1	93.1197	13	96.5572	rs13481955	11.986	0.339
1417502_at	Tspan7	X	10.1593	2	160.461	rs13476878	12.8904	0.336
1417508_at	Rnf19	15	36.1698	11	8.73673	rs3714397	13.3108	0.181
1417509_at	Rnf19	15	36.1711	7	81.4087	rs3656205	13.4547	0.277
1417512_at	Evi5	5	108.174	7	26.7766	rs13479163	15.2819	0.118
1417513_at	Evi5	5	108.245	7	30.1445	rs8261944	12.2747	0.308
1417524_at	Cnih2	19	5.09313	11	47.9608	rs13481014	13.9101	0.257
1417526_at	Pcbp3	10	76.2248	11	4.40873	rs3659787	13.0542	0.241
1417535_at	Fbxo25	8	13.94	6	85.7832	rs13478871	13.2107	0.21
1417557_at	Ubxd1	17	56.208	7	24.6467	rs13479153	13.7809	0.257
1417583_a_at	Crlz1	5	88.9846	1	173.062	rs8258245	13.3715	0.257
1417591_at	Ptges2	2	32.2578	11	4.40873	rs3659787	11.4497	0.518
1417592_at	Frap1	4	147.931	1	62.6385	rs13475891	10.8177	0.588
1417628_at	Supt6h	11	78.0205	15	56.9906	rs3702158	12.4578	0.29
1417658_at	Tbrg4	11	6.51607	2	5.76364	rs13476330	12.0303	0.468
1417672_at	Slc4a10	2	62.1643	7	30.1445	rs8261944	11.1786	0.543
1417673_at	Grb14	2	64.7506	12	99.9811	rs13481611	13.2594	0.225
1417709_at	Cyp46a1	12	109.6	15	45.1075	rs13482547	10.8613	0.476
1417716_at	Got2	8	98.389	7	18.8563	D7Mit57	14.4012	0.225
1417728_at	Mbd3	10	79.8557	15	45.1075	rs13482547	13.4614	0.247
1417757_at	Unc13b	4	43.2773	7	26.7766	rs13479163	14.1537	0.18
1417768_at	Ipla2g	12	45.4126	11	8.73673	rs3714397	16.324	0.111
1417771_a_at	Psmc6	1	12.738	10	27.6975	gnf10.025.923	13.2253	0.254
1417791_a_at	Zfml	6	83.934	7	111.466	rs13479460	13.3941	0.301
1417792_at	Zfml	6	83.927	7	81.4087	rs3656205	15.9258	0.105
1417795_at	Chl1	6	103.679	7	26.7766	rs13479163	11.0198	0.461
1417831_at	Smc1l1	X	148.464	7	26.7766	rs13479163	11.2782	0.302
1417875_at	Ddx50	10	62.0788	2	5.76364	rs13476330	14.6343	0.153
1417879_at	Nenf	1	193.131	11	4.40873	rs3659787	14.235	0.196
1417890_at	Pdxp	15	78.7494	7	30.1445	rs8261944	15.8152	0.12
1417891_at	Tce1	17	25.0285	17	23.9217	rs3023864	37.9219	0.00025
1417916_a_at	Fxc1	7	112.789	14	118.847	rs6265743	13.6592	0.224
1417918_at	Mrpl11	19	4.96293	16	70.0774	rs4199410	11.8971	0.373
1417946_at	Abhd3	18	10.6445	12	82.5076	rs6170344	11.0051	0.412
1417959_at	Pdlim7	13	55.6082	7	30.1445	rs8261944	11.6716	0.491
1417963_at	Pltp	2	164.665	9	41.2419	D9Mit227	10.2727	0.625
1417964_at	Ap3d1	10	80.1698	1	68.9351	rs6312657	10.9892	0.541
1417974_at	Kpna4	3	68.8762	9	123.812	rs8254393	12.2663	0.44
1417980_a_at	Insig2	1	123.201	11	22.9284	rs6283329	9.52186	0.551
1417982_at	Insig2	1	123.202	7	26.7766	rs13479163	14.3369	0.089
1417984_at	Ube2v2	16	15.554	7	26.7766	rs13479163	20.1561	0.021
1418018_at	Cpd	11	76.5955	12	80.8874	gnf12.078.433	11.5823	0.344
1418024_at	Narg1	3	51.2625	7	30.1445	rs8261944	13.3635	0.247
1418048_at	1110059G10Rik	9	122.857	12	100.967	D12Mit231	11.7713	0.413
1418051_at	Ephb6	6	41.5697	7	15.6199	rs6295100	12.59	0.26
1418053_at	Sncb	13	54.8605	13	54.8887	rs13481817	13.955	0.216
1418062_at	Eef1a2	2	180.882	7	30.1445	rs8261944	19.4365	0.047
1418083_at	0610009B22Rik	11	51.499	17	52.1796	CEL-17_50896182	9.78503	0.53
1418090_at	Plvap	8	74.0217	8	72.7366	rs13460430	43.7683	1.81e-05
1418100_at	A030009H04Rik	11	69.1556	11	64.518	rs3695202	47.5258	7e-06
1418112_at	Mrpl10	11	96.9098	11	4.40873	rs3659787	15.7694	0.076
1418124_at	Tmem85	2	112.204	14	118.847	rs6265743	10.752	0.456
1418141_at	Dcx	X	140.292	5	13.8294	mCV23582150	12.2106	0.345
1418149_at	Chga	12	103.801	2	11.7037	rs13476350	11.0156	0.404
1418154_at	BC004022	8	89.3686	16	76.5402	rs4206648	12.0683	0.325
1418168_at	Zcchc14	8	124.123	7	30.1445	rs8261944	14.2484	0.155
1418170_a_at	Zcchc14	8	124.124	5	13.8294	mCV23582150	12.419	0.27
1418171_at	Tceal8	X	132.705	1	173.062	rs8258245	38.2921	2.01e-05
1418177_at	Gabrg2	11	41.7257	7	26.7766	rs13479163	14.0742	0.091
1418209_a_at	Pfn2	3	57.646	7	30.1445	rs8261944	13.6435	0.274
1418240_at	Gbp2	3	142.3	10	13.378	rs4228121	8.40389	0.16
1418253_a_at	Hspa4l	3	40.5907	7	81.4087	rs3656205	10.5394	0.494
1418273_a_at	Rpl30	15	34.3724	2	160.461	rs13476878	14.1544	0.236
1418284_at	Tcfl1	3	94.9263	11	8.73673	rs3714397	20.2316	0.017
1418296_at	Fxyd5	7	31.818	7	30.4293	rs8251849	22.2135	0.0075
1418341_at	Rab4a	8	126.359	16	69.6854	rs4199265	12.8014	0.254
1418381_at	Zfp148	16	33.4983	9	123.812	rs8254393	11.0382	0.404
1418386_at	N6amt2	14	58.1692	14	54.5768	rs13482193	62.5983	3e-06
1418397_at	Zfp275	X	70.6038	7	26.7766	rs13479163	10.8127	0.591
1418425_at	Sp7	15	102.187	7	26.7766	rs13479163	11.9656	0.404
1418429_at	Kif5b	18	6.20243	11	8.73673	rs3714397	15.7902	0.061
1418430_at	Kif5b	18	6.22532	4	49.7924	rs13477695	10.9605	0.595
1418431_at	Kif5b	18	6.21627	12	82.5076	rs6170344	14.6531	0.08
1418452_at	Gng2	14	20.6931	12	37.3788	gnf12.035.312	12.3461	0.39
1418458_at	Anapc7	5	122.894	14	118.847	rs6265743	11.9737	0.304
1418463_at	Pik3r2	8	73.2921	2	11.7037	rs13476350	12.8528	0.259
1418500_at	Nap1l3	X	119.508	10	27.6975	gnf10.025.923	10.5145	0.613
1418501_a_at	Oxr1	15	41.692	7	26.7766	rs13479163	15.4892	0.108
1418502_a_at	Oxr1	15	41.6912	7	26.7766	rs13479163	18.6375	0.043
1418508_a_at	Grb2	11	115.505	7	45.4563	rs13479226	13.4768	0.19
1418535_at	Rgl1	1	154.365	1	147.306	rs6202860	45.1847	4e-06
1418561_at	Sf3b1	1	55.042	1	73.1444	rs13475920	12.5703	0.155
1418562_at	Sf3b1	1	55.0602	7	30.1445	rs8261944	20.4477	0.024
1418594_a_at	Ncoa1	12	4.24946	5	133.347	rs13478539	10.6255	0.571
1418622_at	Rab2	4	8.53416	1	173.062	rs8258245	26.9773	0.002
1418640_at	Sirt1	10	62.7819	7	111.466	rs13479460	10.5298	0.559
1418646_at	Gna-rs1	17	36.1248	7	30.1445	rs8261944	13.3167	0.316
1418647_at	Gna-rs1	17	36.1259	7	15.6199	rs6295100	11.4655	0.382
1418655_at	Galgt1	10	126.609	1	21.6236	rs6253968	12.8913	0.218
1418659_at	Clock	5	76.6413	11	8.73673	rs3714397	12.5114	0.378
1418660_at	Clock	5	76.64	2	160.461	rs13476878	11.6223	0.508
1418667_at	2410002O22Rik	13	104.934	7	34.4076	rs6239372	14.669	0.141
1418691_at	Rgs9	11	109.087	6	85.7832	rs13478871	14.4221	0.147
1418695_a_at	Kcmf1	6	72.7926	17	31.3616	rs13482947	13.9679	0.244
1418738_at	Scn1b	7	31.9016	7	30.1445	rs8261944	18.2513	0.053
1418743_a_at	Tesc	5	118.505	7	30.1445	rs8261944	11.0221	0.569
1418749_at	Psd3	8	70.2131	7	26.7766	rs13479163	17.1927	0.068
1418768_at	Opa1	16	29.652	7	26.7766	rs13479163	10.6379	0.547
1418772_at	BC016423	13	3.56545	11	8.73673	rs3714397	11.4486	0.458
1418773_at	Fads3	19	10.1306	6	112.817	rs13478978	12.0794	0.253
1418774_a_at	Atp7a	X	103.32	X	49.1956	rs13483756	10.4741	0.501
1418775_at	Bles03	19	5.42677	7	30.1445	rs8261944	13.9778	0.238
1418784_at	Grik5	7	25.7949	6	95.039	rs13478906	10.8277	0.532
1418785_at	Mapk8ip2	15	89.2923	15	88.2986	rs13482695	13.1924	0.326
1418825_at	Ifi1	11	48.6788	9	98.3887	rs13480365	7.48682	0.165
1418829_a_at	Eno2	6	124.711	7	30.1445	rs8261944	15.4953	0.067
1418844_at	Alg9	9	50.6511	9	45.9883	rs13480172	42.197	2.12e-05
1418889_a_at	Csnk1d	11	120.825	10	120.097	rs6197175	15.2777	0.11
1418893_at	Pbx2	17	34.7329	15	45.1075	rs13482547	14.7522	0.137
1418901_at	Cebpb	2	167.516	7	30.1445	rs8261944	14.8145	0.093
1418968_at	Rb1cc1	1	6.26466	18	73.9701	rs13483437	11.9736	0.323
1418973_at	Blzf1	1	166.222	7	34.4076	rs6239372	14.6068	0.135
1419038_a_at	Csnk2a1	2	152.053	16	78.0159	rs4207980	13.2488	0.169
1419045_at	Slc25a23	17	57.1833	7	35.0486	rs13479188	11.5963	0.509
1419047_at	Pcnx	12	83.0975	7	26.7766	rs13479163	12.8564	0.344
1419056_at	Rtn2	7	19.8792	15	45.1075	rs13482547	11.1541	0.597
1419067_a_at	Rabgef1	5	130.69	11	8.73673	rs3714397	15.112	0.056
1419074_at	Chac2	11	30.8771	16	69.6854	rs4199265	12.0086	0.389
1419103_a_at	Abhd6	14	8.88798	7	71.5705	rs13479326	11.0834	0.459
1419112_at	Nlk	11	78.3818	7	26.7766	rs13479163	16.108	0.048
1419164_at	Zfp260	7	30.8914	7	26.7766	rs13479163	30.3627	0.000212766
1419165_at	Zfp260	7	30.892	7	26.7766	rs13479163	22.1735	0.0006875
1419181_at	Zfp326	5	106.344	16	89.7741	rs4217061	10.1717	0.629
1419186_a_at	St8sia4	1	97.4843	7	26.7766	rs13479163	20.9258	0.016
1419200_at	Fxyd7	7	31.8277	11	4.40873	rs3659787	14.2724	0.11
1419207_at	Zfp37	4	61.8507	9	123.812	rs8254393	11.1631	0.299
1419250_a_at	Pftk1	5	4.80584	12	80.8874	gnf12.078.433	10.835	0.586
1419252_at	Eps15	4	109.06	7	30.1445	rs8261944	14.6443	0.165
1419254_at	Mthfd2	6	83.259	1	173.062	rs8258245	39.7587	6.33e-05
1419256_at	Spnb2	11	30.0139	10	104.985	rs6283474	10.6262	0.56
1419263_a_at	Adrm1	2	179.91	14	118.847	rs6265743	16.4406	0.127
1419275_at	Dazap1	10	79.7481	6	112.817	rs13478978	12.0084	0.423
1419278_at	Usp48	4	137.206	15	102.993	rs13482752	13.8058	0.201
1419280_at	Pip5k2a	2	18.7658	7	26.7766	rs13479163	14.5824	0.144
1419289_a_at	Syngr1	15	79.9409	16	10.5091	rs4161101	12.8248	0.333
1419369_at	Rnf138	18	21.1861	7	34.4076	rs6239372	11.4638	0.401
1419398_a_at	Dp1	18	34.5168	15	45.1075	rs13482547	18.4977	0.028
1419401_at	Asb13	13	3.65045	16	89.4217	rs4216581	10.5675	0.462
1419451_at	Fzr1	10	80.8303	15	45.1075	rs13482547	10.6133	0.619
1419471_a_at	Nudc	4	133.09	4	132.126	rs3664871	56.6157	1.27e-05
1419489_at	Fam19a5	15	87.5892	7	15.6199	rs6295100	11.1319	0.569
1419499_at	Gpam	19	55.1422	11	19.6458	D11Mit79	15.0852	0.134
1419547_at	Fahd1	17	24.9864	17	12.1586	rs3662820	28.2188	0.0026
1419548_at	Kpna1	16	36.0355	1	66.1981	gnf01.063.789	11.5019	0.462
1419573_a_at	Lgals1	15	78.7585	12	115.998	rs6376011	10.5221	0.535
1419574_at	Zfp292	4	34.7516	11	8.73673	rs3714397	10.7936	0.553
1419586_at	Rp2	X	19.9759	9	123.812	rs8254393	11.7947	0.465
1419592_at	Unc5c	3	141.495	7	30.1445	rs8261944	17.8182	0.053
1419601_at	Kcnj10	1	174.301	1	173.062	rs8258245	45.0703	3e-06
1419640_at	Purb	11	6.37497	15	45.1075	rs13482547	17.1682	0.079
1419641_at	Purb	11	6.37344	7	30.1445	rs8261944	10.6958	0.598
1419642_at	Purb	11	6.37001	7	30.1445	rs8261944	11.681	0.376
1419644_at	Cstf2	X	130.609	9	105.498	rs6205631	13.8073	0.265
1419645_at	Cstf2	X	130.621	7	81.4087	rs3656205	13.0774	0.263
1419655_at	Tle3	9	61.2658	2	5.76364	rs13476330	17.8999	0.054
1419657_a_at	Slc25a36	9	96.976	9	123.812	rs8254393	11.2791	0.493
1419664_at	Srr	11	74.7221	11	8.73673	rs3714397	17.2028	0.071
1419685_at	Rent1	8	72.8555	8	72.7366	rs13460430	37.6122	6e-06
1419716_a_at	Pou2f1	1	167.806	1	165.222	rs4222763	36.3772	3.97e-05
1419732_at	Rtn4r	16	18.1519	7	30.1445	rs8261944	11.7595	0.418
1419741_at	Supt16h	14	52.7802	14	48.7116	rs6278789	92.5485	4e-06
1419748_at	Abcd2	15	90.9794	7	26.7766	rs13479163	25.1519	0.002
1419867_a_at	Ankhd1	18	36.7982	3	89.6293	CEL-3_89968332	14.465	0.232
1420123_at	Tcta	9	108.205	15	96.0287	rs3688273	11.9124	0.283
1420342_at	Pbef1	12	33.5112	7	30.1445	rs8261944	18.038	0.031
1420375_at	Kif3a	11	53.3967	7	30.1445	rs8261944	16.2489	0.044
1420441_at	Cenpc1	5	86.4424	5	84.9106	rs13478363	11.1574	0.324
1420474_at	Mtpn	6	35.4601	7	30.1445	rs8261944	20.1665	0.027
1420475_at	Mtpn	6	35.461	7	30.1445	rs8261944	11.5865	0.457
1420506_a_at	Stxbp1	2	32.6516	2	160.461	rs13476878	10.4063	0.59
1420514_at	Tmem47	X	78.3426	X	54.1151	rs13483766	15.3744	0.054
1420532_at	Magi2	5	20.2083	7	30.1445	rs8261944	10.4148	0.533
1420545_a_at	Chn1	2	73.4512	7	26.7766	rs13479163	13.3835	0.259
1420554_a_at	Rac3	11	120.585	1	21.6236	rs6253968	17.8757	0.012
1420563_at	Gria3	X	39.0227	7	30.1445	rs8261944	14.0873	0.236
1420575_at	Mt3	8	96.6769	7	30.1445	rs8261944	11.8927	0.457
1420608_at	Rbm18	2	35.9716	7	24.6467	rs13479153	10.3341	0.58
1420609_at	2011-03-07	2	60.0867	7	26.7766	rs13479163	18.284	0.031
1420610_at	Prkacb	3	146.41	12	80.8874	gnf12.078.433	11.1207	0.553
1420611_at	Prkacb	3	146.393	2	160.461	rs13476878	22.994	0.01
1420613_at	Ptp4a2	4	129.522	4	129.074	rs3023009	35.3158	0.00030303
1420614_at	Tcte1l	X	9.23227	7	30.1445	rs8261944	30.378	0.0004
1420617_at	Cpeb4	11	31.8345	7	26.7766	rs13479163	13.1572	0.299
1420619_a_at	Aes	10	81.0283	7	15.6199	rs6295100	14.1855	0.241
1420622_a_at	Hspa8	9	40.6124	7	112.527	rs3674465	9.72777	0.62
1420670_at	Arnt2	7	91.3973	7	71.5705	rs13479326	13.5618	0.235
1420745_a_at	Ccndbp1	2	120.84	2	118.572	UT_2_119.151187	33.3288	8.93e-05
1420752_at	Dtx3	10	126.628	7	30.1445	rs8261944	11.9386	0.435
1420808_at	Ncoa4	14	32.9919	11	8.73673	rs3714397	11.5911	0.532
1420811_a_at	Catnb	9	120.869	6	95.039	rs13478906	14.4594	0.19
1420815_at	Gdi2	13	3.5645	4	104.787	rs13477919	13.7783	0.247
1420816_at	Ywhag	5	136.387	16	12.3864	rs4162800	11.3682	0.585
1420821_at	Sgpp1	12	76.8157	X	8.70931	rs13483712	9.82429	0.554
1420833_at	Vamp2	11	68.9027	7	18.8563	D7Mit57	15.8981	0.103
1420834_at	Vamp2	11	68.9053	7	35.0486	rs13479188	14.1503	0.16
1420856_a_at	Lancl2	6	57.6879	7	30.1445	rs8261944	12.884	0.308
1420858_at	Pkia	3	7.44352	7	26.7766	rs13479163	12.721	0.262
1420859_at	Pkia	3	7.44478	1	73.1444	rs13475920	10.3255	0.586
1420870_at	Mllt10	2	18.1335	7	45.4563	rs13479226	13.9454	0.134
1420871_at	Gucy1b3	3	81.8369	3	77.9986	rs3672300	16.1647	0.06
1420880_a_at	Ywhab	2	163.844	13	12.117	rs13459139	14.6483	0.165
1420887_a_at	Bcl2l1	2	152.608	7	30.1445	rs8261944	18.3219	0.064
1420922_at	Usp9x	X	12.7677	7	26.7766	rs13479163	15.6529	0.128
1420933_a_at	Eya3	4	132.278	10	27.6975	gnf10.025.923	12.7783	0.219
1420945_at	Atrx	X	102.996	11	8.73673	rs3714397	16.6512	0.097
1420946_at	Atrx	X	103.013	7	81.4087	rs3656205	10.8878	0.599
1420956_at	Apc	18	34.4787	7	30.1445	rs8261944	13.4976	0.306
1420961_a_at	Ivns1abp	1	153.203	7	30.1445	rs8261944	21.0532	0.014
1420965_a_at	Enc1	13	98.0228	11	11.0711	rs3023249	15.6189	0.131
1420971_at	Ubr1	2	120.687	7	26.7766	rs13479163	11.6575	0.505
1420976_at	Man1a2	3	100.371	7	30.1445	rs8261944	13.9925	0.251
1420977_at	Man1a2	3	100.369	7	30.1445	rs8261944	18.5193	0.064
1420985_at	Ash1l	3	88.7863	4	49.7924	rs13477695	15.9801	0.092
1420997_a_at	Gpi1	7	34.9873	7	30.1445	rs8261944	30.2256	0.0006875
1421000_at	Cnot4	6	34.9951	11	22.9284	rs6283329	12.4453	0.411
1421026_at	Gna12	5	141.236	7	24.6467	rs13479153	17.6465	0.072
1421028_a_at	Mef2c	13	83.7951	7	30.1445	rs8261944	11.8678	0.448
1421029_a_at	Hbs1l	10	21.0881	7	26.7766	rs13479163	13.4982	0.196
1421070_at	D3Ertd300e	3	54.5209	7	26.7766	rs13479163	10.5435	0.566
1421096_at	Trpc1	9	95.6057	7	26.7766	rs13479163	15.2806	0.065
1421097_at	Endog	2	30.0275	7	30.1445	rs8261944	13.954	0.265
1421123_at	Cdk5r1	11	80.2916	15	28.9905	rs3702361	14.0511	0.21
1421127_at	Tmem42	9	122.932	15	92.8372	rs13482715	9.49133	0.524
1421137_a_at	Pkib	10	57.4564	12	102.821	rs13481617	15.4549	0.112
1421144_at	Rpgrip1	14	52.78	14	48.7116	rs6278789	107.111	1e-06
1421154_at	Hcn2	10	79.1983	15	45.1075	rs13482547	17.4144	0.031
1421160_a_at	Rfng	11	120.643	7	18.8563	D7Mit57	13.8906	0.222
1421166_at	Atrn	2	130.853	16	67.8069	rs3695481	10.992	0.582
1421181_at	Nptxr	15	79.6198	16	10.5091	rs4161101	13.5267	0.192
1421217_a_at	Lgals9	11	78.7792	9	105.632	rs13480398	10.3633	0.09
1421252_a_at	Mef2a	7	74.3771	7	30.1445	rs8261944	12.0864	0.389
1421255_a_at	Cabp1	5	115.623	15	45.1075	rs13482547	13.8623	0.171
1421267_a_at	Cited2	10	17.4439	15	45.1075	rs13482547	13.1787	0.282
1421280_at	Gabra1	11	41.9468	7	30.1445	rs8261944	17.8689	0.054
1421312_a_at	Kifc2	15	76.4981	6	95.039	rs13478906	17.4458	0.082
1421327_at	Mtap2	1	66.4801	7	81.4087	rs3656205	11.3295	0.494
1421339_at	Extl3	14	65.6732	10	122.416	rs13480802	13.1424	0.245
1421348_a_at	Bm66	7	148.613	3	142.572	rs6290401	10.7356	0.528
1421351_at	Gria4	9	4.42016	7	81.4087	rs3656205	13.1281	0.267
1421395_at	Zik1	7	11.0738	1	73.1444	rs13475920	13.0926	0.213
1421448_at	Garnl1	12	56.7416	2	160.461	rs13476878	13.8479	0.209
1421654_a_at	Lmna	3	88.288	7	30.1445	rs8261944	16.9203	0.103
1421830_at	Ak3l1	4	101.139	2	5.76364	rs13476330	12.4766	0.357
1421835_at	Mtap7	10	19.9999	12	37.3788	gnf12.035.312	11.002	0.476
1421840_at	Abca1	4	53.0439	7	26.7766	rs13479163	21.6763	0.0065
1421849_at	Stag2	X	39.6298	11	8.73673	rs3714397	15.0528	0.16
1421866_at	Nr3c1	18	39.5739	7	81.4087	rs3656205	12.9067	0.356
1421867_at	Nr3c1	18	39.572	7	81.4087	rs3656205	18.1386	0.042
1421871_at	Sh3bgrl	X	106.356	7	30.1445	rs8261944	20.5476	0.0075
1421880_at	Mtmr1	X	68.6713	18	73.9701	rs13483437	10.584	0.608
1421889_a_at	Aplp2	9	30.9583	16	12.3864	rs4162800	12.0586	0.474
1421897_at	Elk1	X	20.5115	7	24.6467	rs13479153	20.2792	0.007
1421908_a_at	Tcf12	9	71.6936	7	26.7766	rs13479163	12.836	0.214
1421928_at	Epha4	1	77.3658	7	30.1445	rs8261944	15.2752	0.071
1421929_at	Epha4	1	77.3703	7	30.1445	rs8261944	19.4745	0.011
1421955_a_at	Nedd4	9	72.5905	7	81.4087	rs3656205	10.958	0.604
1421970_a_at	Gria2	3	80.4925	2	169.644	rs3143843	14.6961	0.161
1421978_at	Gad2	2	22.5368	16	17.5769	rs4165069	11.0935	0.57
1421990_at	Syt1	10	107.937	7	81.4087	rs3656205	11.0163	0.583
1421998_at	Tor3a	1	158.584	1	155.968	rs13476187	46.4669	7e-06
1422018_at	Hivep2	10	13.8697	7	81.4087	rs3656205	12.2288	0.285
1422034_a_at	Palm	10	79.2824	7	15.6199	rs6295100	16.6514	0.094
1422052_at	Cdh8	8	101.554	7	26.7766	rs13479163	23.9644	0.0026
1422073_a_at	Celsr2	3	108.195	7	15.6199	rs6295100	12.5412	0.405
1422078_at	Akt3	1	178.954	3	89.6293	CEL-3_89968332	11.3701	0.49
1422157_a_at	Itgb1bp1	12	21.2779	12	16.8539	rs6180964	34.4104	3.79e-05
1422397_a_at	Il15ra	2	11.64	X	35.1443	gnfX.023.543	11.4428	0.283
1422414_a_at	Calm2	17	87.8344	11	8.73673	rs3714397	18.2269	0.04
1422432_at	Dbi	1	122.013	1	121.948	rs6302966	40.5563	4.83e-05
1422442_at	Smu1	4	40.6842	7	26.7766	rs13479163	17.2885	0.026
1422444_at	Itga6	2	71.6942	4	49.7924	rs13477695	12.6503	0.365
1422453_at	Prpf8	11	75.3221	1	62.6385	rs13475891	15.0874	0.162
1422469_at	Tbk1	10	120.984	10	27.6975	gnf10.025.923	13.0287	0.313
1422471_at	Pex13	11	23.549	7	35.0486	rs13479188	13.9816	0.193
1422472_at	Pex13	11	23.5465	11	8.73673	rs3714397	11.1628	0.416
1422478_a_at	Acas2	2	155.388	6	77.4513	rs3663024	12.4841	0.34
1422486_a_at	Smad4	18	73.7985	7	44.7592	rs6228386	12.3238	0.458
1422487_at	Smad4	18	73.7988	9	123.812	rs8254393	11.6946	0.504
1422492_at	Cpox	16	58.6799	16	44.9919	rs4180247	16.0551	0.105
1422500_at	Idh3a	9	54.4521	6	77.4513	rs3663024	14.638	0.146
1422507_at	Cstb	10	77.8885	2	16.2235	rs13476358	15.2636	0.125
1422517_a_at	Znrd1	17	37.0915	11	47.9608	rs13481014	12.6823	0.202
1422521_at	Dctn1	6	83.1486	7	15.6199	rs6295100	13.9229	0.245
1422531_at	Syt5	7	4.49169	9	41.2419	D9Mit227	13.6153	0.217
1422564_at	Actl6b	5	138.008	7	30.1445	rs8261944	13.5081	0.297
1422621_at	Ranbp2	10	57.9565	11	8.73673	rs3714397	18.8831	0.037
1422625_at	Ly6h	15	75.3954	11	47.9608	rs13481014	11.001	0.394
1422631_at	Ahr	12	36.1827	7	83.7587	rs13479374	11.2087	0.501
1422635_at	Ache	5	137.733	15	88.2986	rs13482695	10.7997	0.46
1422684_a_at	Exoc4	6	33.9225	6	77.4513	rs3663024	21.5365	0.016
1422685_at	Exoc4	6	33.9239	11	8.73673	rs3714397	14.8773	0.069
1422692_at	Rpo2tc1	15	11.9113	7	26.7766	rs13479163	25.2774	0.00325
1422702_at	Oazin	15	38.4197	7	30.1445	rs8261944	12.9086	0.32
1422704_at	Gyk	X	82.948	7	24.6467	rs13479153	20.5751	0.0065
1422705_at	Tmepai	2	173.054	7	30.1445	rs8261944	12.8104	0.214
1422712_a_at	Ube2i	17	25.4017	16	13.0559	rs4163042	12.9266	0.296
1422752_at	Polr3k	2	181.604	11	8.73673	rs3714397	12.078	0.307
1422791_at	Pafah1b2	9	45.7767	19	61.2761	rs6193060	11.8946	0.347
1422795_at	Cul3	1	80.2632	7	30.1445	rs8261944	13.673	0.251
1422799_at	Bat2	17	35.2861	7	30.1445	rs8261944	14.2373	0.182
1422807_at	Arf5	6	28.3758	11	8.73673	rs3714397	15.4677	0.1
1422835_at	Kcnd2	6	21.6792	7	26.7766	rs13479163	22.7371	0.0105
1422842_at	Xrn2	2	146.853	7	30.1445	rs8261944	17.9973	0.048
1422847_a_at	Prkcd	14	31.409	7	26.7766	rs13479163	12.8327	0.301
1422857_at	Trip4	9	65.6811	11	8.73673	rs3714397	11.5879	0.458
1422880_at	Sypl	12	33.6612	7	30.1445	rs8261944	19.2819	0.044
1422883_at	Usp8	2	126.582	7	81.4087	rs3656205	17.0956	0.069
1422927_at	2310016N21Rik	5	69.9082	7	30.4293	rs8251849	16.2702	0.046
1422936_at	Mas1	17	13.0339	16	44.9919	rs4180247	10.9703	0.619
1422945_a_at	Kif5c	2	49.5495	7	30.1445	rs8261944	10.4774	0.536
1422954_at	Zfp60	7	28.5349	10	122.416	rs13480802	11.0779	0.553
1422973_a_at	Thrsp	7	104.566	7	95.8591	rs13479416	39.9694	1.87e-05
1422984_at	Cyln2	5	134.966	9	41.2419	D9Mit227	15.7368	0.15
1422998_a_at	Glrx2	1	145.592	16	69.1723	rs4199044	15.2457	0.024
1423010_at	Sacs	14	61.8328	7	26.7766	rs13479163	15.4604	0.133
1423033_at	Stt3a	9	36.5391	7	30.1445	rs8261944	11.9249	0.398
1423034_at	Txnl5	11	72.0212	16	84.9707	rs4212088	11.5701	0.444
1423041_a_at	Bzw1	1	58.4625	16	63.7153	rs4151935	11.5858	0.489
1423060_at	Pa2g4	10	127.997	16	34.2281	rs4171932	12.5294	0.349
1423094_at	Crbn	6	106.731	11	8.73673	rs3714397	16.3927	0.054
1423096_at	Capn7	14	32.1846	7	26.7766	rs13479163	12.4448	0.386
1423102_a_at	Rnf10	5	115.692	6	95.039	rs13478906	11.2939	0.558
1423107_at	Ube2b	11	87.7581	13	54.8887	rs13481817	15.1451	0.118
1423117_at	Pum1	4	130.329	3	89.6293	CEL-3_89968332	9.69199	0.558
1423128_at	Aip	19	4.11448	14	118.847	rs6265743	12.1238	0.403
1423144_at	Pik3ca	3	32.3621	2	169.644	rs3143843	12.1946	0.294
1423150_at	Scg5	2	113.617	2	109.791	rs6318808	78.8743	6e-06
1423157_at	Gnpnat1	14	45.9962	11	8.73673	rs3714397	15.6947	0.029
1423159_at	Dld	12	32.017	11	8.73673	rs3714397	10.2325	0.561
1423160_at	Spred1	2	117.006	11	8.73673	rs3714397	12.3032	0.387
1423194_at	Arhgap5	12	53.6204	7	30.1445	rs8261944	15.1739	0.163
1423195_at	Hiat1	3	116.334	2	5.76364	rs13476330	10.2692	0.611
1423201_at	Ncor1	11	62.2045	7	30.1445	rs8261944	17.446	0.044
1423205_at	Tm9sf4	2	153.036	2	149.357	rs6206791	70.6563	2e-06
1423209_at	0610041E09Rik	13	90.2483	7	30.1445	rs8261944	15.14	0.17
1423215_at	Spcs2	7	106.988	7	95.8591	rs13479416	47.5213	7e-06
1423216_a_at	Fam32a	8	74.7464	8	72.7366	rs13460430	102.166	9e-06
1423220_at	Eif4e	3	138.219	7	30.1445	rs8261944	13.1221	0.114
1423221_at	Tubb4	17	57.2195	7	30.1445	rs8261944	24.0432	0.0055
1423231_at	Nrgn	9	37.3525	15	45.1075	rs13482547	12.8363	0.326
1423240_at	Src	2	157.297	2	156.555	rs6265656	56.6852	1.83e-05
1423242_at	Mrps36	13	101.506	2	160.461	rs13476878	12.9947	0.216
1423278_at	Ptprk	10	28.3165	7	26.7766	rs13479163	36.7664	0.00052381
1423297_at	Add3	19	53.32	7	81.4087	rs3656205	12.5267	0.303
1423298_at	Add3	19	53.3209	7	26.7766	rs13479163	16.5783	0.063
1423305_at	Extl1	4	133.913	4	133.28	rs6404906	50.8062	5e-06
1423322_at	Lin7c	2	109.74	2	160.461	rs13476878	12.0471	0.326
1423328_at	Gdap1	1	17.1538	7	26.7766	rs13479163	12.6265	0.385
1423336_at	Orc4l	2	48.7584	7	24.6467	rs13479153	16.6634	0.092
1423337_at	Orc4l	2	48.7599	7	30.1445	rs8261944	11.7936	0.478
1423347_at	Sec23a	12	60.0599	7	26.7766	rs13479163	11.4189	0.447
1423362_at	Sort1	3	108.164	2	159.995	rs6152944	16.3368	0.092
1423363_at	Sort1	3	108.16	16	17.5769	rs4165069	12.8182	0.342
1423369_at	Fmr1	X	65.9702	7	26.7766	rs13479163	18.4469	0.074
1423370_a_at	Csnk1g2	10	80.1026	7	18.8563	D7Mit57	16.0603	0.108
1423373_at	Rpp30	19	36.1747	X	128.95	rs13484003	12.2379	0.242
1423374_at	Ncoa6	2	155.217	7	26.7766	rs13479163	12.1236	0.132
1423383_a_at	Osbpl9	4	108.734	11	22.9284	rs6283329	11.535	0.267
1423402_at	Creb1	1	64.6442	7	81.4087	rs3656205	15.3794	0.09
1423420_at	Adrb1	19	56.7987	16	78.0159	rs4207980	21.5027	0.00533333
1423426_at	1300012G16Rik	5	120.934	7	30.1445	rs8261944	18.7338	0.046
1423432_at	Phip	9	82.7944	11	58.0605	rs13481045	11.7527	0.389
1423441_at	Tfb2m	1	181.459	7	30.1445	rs8261944	20.7314	0.022
1423444_at	Rock1	18	10.0831	7	30.1445	rs8261944	15.7934	0.076
1423445_at	Rock1	18	10.0651	11	8.73673	rs3714397	13.0526	0.169
1423459_at	Cops2	2	125.658	7	30.1445	rs8261944	13.0125	0.282
1423462_at	Map3k7ip2	10	7.6255	7	30.4293	rs8251849	10.744	0.552
1423470_at	Ptbp2	3	119.422	7	26.7766	rs13479163	10.8597	0.607
1423479_at	Nol11	11	107.029	6	90.3235	rs3661039	10.905	0.578
1423534_at	Pdcd2	17	15.6587	3	142.572	rs6290401	9.56746	0.593
1423544_at	Ptpn5	7	54.3335	7	24.6467	rs13479153	19.8789	0.02
1423561_at	Nell2	15	95.05	15	92.8372	rs13482715	20.8571	0.015
1423564_a_at	Paics	5	77.3961	12	99.9811	rs13481611	10.4896	0.531
1423577_at	Ankrd32	13	77.1825	6	85.7832	rs13478871	11.8991	0.397
1423584_at	Igfbp7	5	77.7784	11	8.73673	rs3714397	16.6536	0.063
1423588_at	Arpc4	6	113.334	11	4.40873	rs3659787	13.8022	0.217
1423589_at	Arpc4	6	113.339	7	30.1445	rs8261944	12.9659	0.31
1423592_at	Rock2	12	16.994	2	169.644	rs3143843	14.4598	0.165
1423603_at	Zfpm1	8	124.86	7	15.6199	rs6295100	13.283	0.337
1423646_at	Zdhhc3	9	122.986	15	92.8372	rs13482715	12.0517	0.455
1423654_a_at	Rnf4	5	34.6955	7	109.771	rs3686975	11.1153	0.33
1423671_at	Dner	1	84.3666	1	165.222	rs4222763	10.3844	0.619
1423697_at	Psmd6	14	14.9467	16	70.0774	rs4199410	10.8261	0.562
1423725_at	Pls3	X	73.0311	11	8.73673	rs3714397	17.1305	0.059
1423729_a_at	2500002L14Rik	6	72.3098	X	54.1151	rs13483766	10.7296	0.57
1423730_at	Clptm1l	13	73.7576	6	88.9762	rs3142215	17.7531	0.034
1423735_a_at	Wdr36	18	33.0244	2	5.76364	rs13476330	12.4364	0.085
1423736_a_at	Dym	18	75.3897	16	38.2971	rs4151928	16.6214	0.079
1423740_a_at	Rbm10	X	20.2279	7	30.1445	rs8261944	20.565	0.0055
1423747_a_at	Pdk1	2	71.7399	11	8.73673	rs3714397	13.703	0.141
1423758_at	G3bp2	5	92.4814	11	47.9608	rs13481014	13.6627	0.247
1423767_at	Aip1	17	74.699	2	160.461	rs13476878	11.0902	0.383
1423773_at	Gpbp1	13	112.217	8	121.267	gnf08.119.598	11.5376	0.474
1423777_at	Usp20	2	30.8776	1	21.6236	rs6253968	10.7754	0.595
1423779_at	Chchd6	6	89.3346	16	38.2971	rs4151928	11.8004	0.369
1423781_at	Appbp1	8	107.037	7	35.0486	rs13479188	9.46103	0.453
1423783_at	Tor2a	2	32.6172	7	30.1445	rs8261944	11.2406	0.481
1423792_a_at	Cklfsf6	9	114.658	4	49.7924	rs13477695	11.4537	0.338
1423795_at	Sfpq	4	126.707	18	68.6398	rs6346101	10.7082	0.58
1423804_a_at	Idi1	13	8.89146	9	123.812	rs8254393	11.5087	0.388
1423806_at	2610034N24Rik	7	104.684	7	95.8591	rs13479416	37.9937	3e-06
1423816_at	Cxx1a	X	50.9727	15	56.9906	rs3702158	12.4841	0.319
1423821_at	Tmem168	6	13.5317	11	8.73673	rs3714397	10.7717	0.457
1423839_a_at	Btf3	13	99.0799	13	12.117	rs13459139	10.6992	0.562
1423883_at	Acsl1	8	47.6208	4	31.8934	rs6177140	12.8996	0.251
1423897_at	Rnf187	11	58.7458	7	45.4563	rs13479226	18.7419	0.031
1423898_a_at	Trip12	1	84.721	7	26.7766	rs13479163	14.4129	0.183
1423900_at	Trip12	1	84.7201	2	160.461	rs13476878	10.7201	0.577
1423901_at	Trip12	1	84.7195	15	102.993	rs13482752	9.95708	0.483
1423912_at	Aspscr1	11	120.565	13	76.2302	rs3664096	14.0801	0.055
1423914_at	Dmc1	11	115.209	7	30.1445	rs8261944	13.7016	0.221
1423948_at	Bag2	1	33.8025	2	16.2235	rs13476358	7.52968	0.127
1423967_at	Palm	10	79.2831	7	15.6199	rs6295100	14.9333	0.19
1423982_at	Fusip1	4	135.421	X	35.1443	gnfX.023.543	14.1666	0.239
1423983_at	Sez6l2	7	134.111	7	18.8563	D7Mit57	14.0578	0.235
1423984_a_at	Meis3	7	16.77	7	45.4563	rs13479226	16.0548	0.132
1423985_at	Gng5	3	146.166	2	160.461	rs13476878	12.0982	0.351
1424020_at	Arl6ip6	2	53.0769	9	123.812	rs8254393	10.9805	0.45
1424064_at	Rab1b	19	5.09928	X	80.8499	rs13483868	13.1756	0.135
1424074_at	Btf3l4	4	108.487	7	26.7766	rs13479163	22.1179	0.005
1424077_at	Gdpd1	11	86.8491	11	90.6192	rs13481156	36.5767	1.33e-05
1424106_at	1200003C05Rik	12	73.202	12	100.967	D12Mit231	10.6502	0.498
1424111_at	Igf2r	17	12.8754	1	173.062	rs8258245	10.6779	0.398
1424124_at	Mospd2	X	161.374	11	8.73673	rs3714397	14.8652	0.071
1424132_at	Hras1	7	148.377	7	30.1445	rs8261944	15.5872	0.167
1424134_at	Rspry1	8	97.1705	5	20.7593	rs6256752	11.4864	0.445
1424137_at	Gprin1	13	54.8383	7	15.6199	rs6295100	12.7869	0.163
1424167_a_at	Pmm1	15	81.7818	X	80.8499	rs13483868	14.2685	0.154
1424188_at	Rabgap1	2	37.4214	7	26.7766	rs13479163	15.7392	0.112
1424199_at	Seh1l	18	67.9545	X	35.1443	gnfX.023.543	10.9838	0.577
1424203_at	Ncln	10	80.9494	7	30.1445	rs8261944	16.2991	0.134
1424204_at	Mrpl13	15	55.3706	12	100.967	D12Mit231	13.1621	0.146
1424207_at	Smarca5	8	83.2345	3	3.77107	rs13476950	9.88694	0.627
1424216_a_at	Papola	12	107.043	10	27.6975	gnf10.025.923	11.3492	0.409
1424220_a_at	Porcn	X	7.77114	16	38.2971	rs4151928	11.6289	0.482
1424265_at	Npl	1	155.35	1	154.947	rs13476184	43.2614	2.11e-05
1424274_at	Vdp	5	92.6312	7	26.7766	rs13479163	15.351	0.126
1424283_at	Jtb	3	90.0393	16	69.6854	rs4199265	11.4318	0.326
1424318_at	Hspc159	11	20.7237	7	81.4087	rs3656205	13.0827	0.273
1424342_at	Fyttd1	16	32.9059	7	30.1445	rs8261944	12.0297	0.433
1424343_a_at	Eif1a	18	46.7682	X	128.95	rs13484003	10.3842	0.561
1424349_a_at	Lpgat1	1	193.602	16	76.5402	rs4206648	14.2427	0.135
1424385_at	5830417I10Rik	3	88.7134	3	77.9986	rs3672300	26.4312	0.0024
1424386_at	Reep2	18	35.0065	15	45.1075	rs13482547	10.8997	0.574
1424397_at	Dhx36	3	62.2744	7	26.7766	rs13479163	12.9857	0.279
1424398_at	Dhx36	3	62.2994	7	30.1445	rs8261944	16.104	0.052
1424402_at	Rufy3	5	89.0701	7	30.1445	rs8261944	18.6335	0.028
1424403_a_at	Rufy3	5	89.0663	7	30.1445	rs8261944	12.5568	0.336
1424411_at	Kua	2	167.469	11	4.40873	rs3659787	15.2644	0.129
1424431_at	Galnact2	6	118.058	10	27.6975	gnf10.025.923	11.4089	0.404
1424441_at	Slc27a4	2	29.6714	X	80.8499	rs13483868	13.8279	0.204
1424442_a_at	Pja2	17	64.6323	7	30.1445	rs8261944	14.7593	0.07
1424455_at	Gprasp1	X	132.338	2	160.461	rs13476878	10.7276	0.47
1424461_at	Dctn2	10	126.715	1	21.6236	rs6253968	14.8317	0.153
1424462_at	Ergic2	6	148.129	11	8.73673	rs3714397	19.9787	0.018
1424465_at	Dnajc3	14	119.352	12	102.821	rs13481617	11.364	0.424
1424472_at	Nol6	4	41.0617	7	30.1445	rs8261944	29.2249	3.02e-05
1424490_at	Zfp428	7	25.3004	7	30.1445	rs8261944	14.2452	0.255
1424514_at	Rnf126	10	79.2214	11	4.40873	rs3659787	13.428	0.3
1424515_at	BB440272	UN	0	11	8.73673	rs3714397	16.0244	0.045
1424540_at	Hipk1	3	103.544	7	81.4087	rs3656205	16.2322	0.068
1424550_at	Zfyve27	19	42.2656	7	15.6199	rs6295100	12.8679	0.324
1424571_at	Ddx46	13	55.7812	7	26.7766	rs13479163	13.8714	0.224
1424573_at	Tmed5	5	108.553	1	73.1444	rs13475920	9.61803	0.611
1424574_at	Tmed5	5	108.551	7	34.4076	rs6239372	14.6104	0.185
1424598_at	Ddx6	9	44.4447	2	109.584	rs6208879	13.2409	0.275
1424603_at	Sumf1	6	108.058	6	111.266	rs13478971	12.2488	0.423
1424615_at	Frag1	7	109.387	7	95.8591	rs13479416	42.0739	4.33e-05
1424619_at	Sf3b4	3	95.9807	7	26.7766	rs13479163	22.3407	0.011
1424625_a_at	6030446I19Rik	2	37.6546	12	49.8417	gnf12.047.285	10.7969	0.603
1424632_a_at	Rev3l	10	39.5945	7	26.7766	rs13479163	16.2172	0.111
1424635_at	Eef1a1	9	17.5381	15	45.1075	rs13482547	12.1214	0.352
1424657_at	Taok1	11	77.3512	7	30.1445	rs8261944	12.9785	0.288
1424663_at	BC017647	11	77.969	11	58.0605	rs13481045	11.375	0.471
1424672_at	Dmxl1	18	50.1233	11	8.73673	rs3714397	16.4706	0.071
1424736_at	Eef2	10	80.6447	15	45.1075	rs13482547	11.5314	0.474
1424737_at	Thrsp	7	104.562	7	95.8591	rs13479416	53.0172	9e-06
1424751_at	Abt1	13	23.5137	14	118.447	rs13482396	13.955	0.247
1424757_at	Lppr2	9	21.7528	7	30.1445	rs8261944	17.0014	0.065
1424760_a_at	Smyd2	1	191.704	14	118.847	rs6265743	10.8395	0.443
1424767_at	Cdh22	2	164.937	6	65.0374	rs13478801	15.2669	0.138
1424776_a_at	Slc25a28	19	43.7383	15	45.1075	rs13482547	11.7734	0.378
1424820_a_at	Ndfip1	18	38.6247	7	111.466	rs13479460	16.1724	0.027
1424848_at	Kcnma1	14	24.118	16	78.0159	rs4207980	10.5057	0.59
1424873_at	Rnf2	1	153.317	12	35.7064	gnf12.033.545	11.3966	0.435
1424896_at	Gpr85	6	13.7853	16	91.559	rs4219239	9.81719	0.615
1424903_at	Jarid1d	Y	0.279707	11	8.73673	rs3714397	10.3578	0.614
1424922_a_at	Brd4	17	31.9434	16	78.0159	rs4207980	13.984	0.208
1424935_at	Gdap1l1	2	163.279	11	47.9608	rs13481014	11.6597	0.249
1424949_at	Huwe1	X	148.369	7	26.7766	rs13479163	16.2386	0.11
1424954_a_at	Pip5k1c	10	80.7822	7	18.8563	D7Mit57	15.9719	0.058
1425014_at	Nr2c2	6	92.1174	4	44.3385	gnf04.041.337	10.5893	0.545
1425020_at	Ubxd2a	12	4.88394	7	26.7766	rs13479163	17.0376	0.061
1425029_a_at	Oact2	12	25.6442	12	16.8539	rs6180964	53.787	3e-06
1425054_a_at	2510006D16Rik	4	129.279	4	129.074	rs3023009	53.1856	4.74e-05
1425092_at	Cdh10	15	18.9434	7	30.1445	rs8261944	16.901	0.111
1425097_a_at	Zfp106	2	120.352	2	16.2235	rs13476358	11.1411	0.522
1425196_a_at	Hint2	4	43.6672	11	4.40873	rs3659787	13.7674	0.262
1425206_a_at	0610009M14Rik	7	66.5626	7	30.1445	rs8261944	13.1549	0.296
1425241_a_at	Wsb1	11	79.053	12	35.7064	gnf12.033.545	13.9546	0.112
1425262_at	Cebpg	7	35.8325	11	4.40873	rs3659787	12.1571	0.468
1425301_at	Ncam2	16	81.6241	7	30.1445	rs8261944	12.0734	0.479
1425337_at	Slc12a5	2	164.823	16	10.5091	rs4161101	14.2972	0.189
1425350_a_at	Myef2	2	124.914	11	42.2154	rs3693664	11.3685	0.456
1425354_a_at	Aggf1	13	96.1207	6	85.7832	rs13478871	12.7058	0.34
1425467_a_at	Plp1	X	133.37	1	172.887	rs8242852	13.4813	0.264
1425488_at	Slu7	11	43.2556	10	120.775	rs6237927	12.8055	0.275
1425491_at	Bmpr1a	14	35.2272	7	30.1445	rs8261944	15.335	0.101
1425492_at	Bmpr1a	14	35.2243	7	30.1445	rs8261944	16.7697	0.101
1425495_at	Zfp62	11	49.0317	9	123.812	rs8254393	10.4291	0.606
1425497_a_at	Prpf4b	13	34.9911	2	169.644	rs3143843	10.5391	0.577
1425498_at	Prpf4b	13	34.9942	11	8.73673	rs3714397	14.8293	0.18
1425514_at	Pik3r1	13	102.454	5	13.8294	mCV23582150	13.7433	0.227
1425516_at	Ogt	X	98.8781	2	169.644	rs3143843	14.2142	0.185
1425530_a_at	Stx3	19	11.8496	7	26.7766	rs13479163	18.5808	0.03
1425532_a_at	Bin1	18	32.5845	7	18.8563	D7Mit57	17.7261	0.054
1425537_at	Ppm1a	12	73.8899	11	22.9284	rs6283329	10.5977	0.535
1425539_a_at	Rtn3	19	7.50174	12	115.998	rs6376011	10.7197	0.56
1425568_a_at	Tmem33	5	67.6775	12	102.821	rs13481617	12.3773	0.238
1425572_a_at	Ddef1	15	63.9204	18	77.0745	rs3705890	12.0039	0.402
1425576_at	Ahcyl1	3	107.47	7	81.4087	rs3656205	11.9436	0.2
1425577_at	Zmym5	14	57.4122	7	26.7766	rs13479163	11.3777	0.503
1425599_a_at	Gatad1	5	3.64356	16	76.5402	rs4206648	13.7874	0.241
1425622_at	Edil3	13	89.3244	19	59.3751	rs6191324	11.9309	0.246
1425628_a_at	Gtf2i	5	134.714	11	47.9608	rs13481014	15.1745	0.102
1425629_a_at	Nol6	4	41.0629	6	85.7832	rs13478871	19.0484	0.023
1425642_at	Cep290	10	100.036	11	8.73673	rs3714397	12.0103	0.421
1425711_a_at	Akt1	12	113.893	7	15.6199	rs6295100	14.6437	0.22
1425760_a_at	Pitpnm1	19	4.11276	7	15.6199	rs6295100	12.882	0.286
1425777_at	Cacnb1	11	97.8632	7	30.1445	rs8261944	15.6233	0.1
1425822_a_at	Dtx1	5	121.13	X	80.8499	rs13483868	11.1461	0.118
1425845_a_at	Shoc2	19	54.104	19	52.2553	rs13483669	20.1328	0.00333333
1425932_a_at	Cugbp1	2	90.8506	12	80.8874	gnf12.078.433	11.2072	0.535
1425940_a_at	Ssbp3	4	106.719	X	80.8499	rs13483868	9.77506	0.58
1425946_at	Gstm7	3	107.729	7	26.7766	rs13479163	12.1502	0.258
1426016_a_at	Tro	X	147.08	7	30.1445	rs8261944	15.2635	0.124
1426024_a_at	Dbn1	13	55.5754	7	30.1445	rs8261944	19.2297	0.046
1426068_at	Slc7a4	16	17.5735	X	80.8499	rs13483868	8.62808	0.259
1426081_a_at	Dio2	12	91.9647	15	96.0287	rs3688273	10.646	0.619
1426094_at	Rhbdl1	17	25.9716	14	118.847	rs6265743	11.2493	0.454
1426115_a_at	Kcnj9	1	174.256	1	173.062	rs8258245	69.9173	1.07e-05
1426118_a_at	Tomm40	7	20.2882	7	18.8563	D7Mit57	20.5609	0.015
1426204_a_at	Oprl1	2	181.455	10	101.805	rs13480734	11.0148	0.596
1426236_a_at	Glul	1	155.756	1	154.947	rs13476184	42.2565	1.74e-05
1426244_at	Mapre2	18	24.0503	3	89.6293	CEL-3_89968332	12.3523	0.406
1426248_at	Stk24	14	121.683	7	26.7766	rs13479163	20.0211	0.021
1426271_at	Smc5l1	19	23.2833	7	26.7766	rs13479163	11.035	0.426
1426293_at	6330581L23Rik	7	30.6166	7	26.7766	rs13479163	58.1387	2e-06
1426295_at	Hapln1	13	89.7491	7	30.1445	rs8261944	14.2241	0.206
1426301_at	Alcam	16	52.2511	7	30.1445	rs8261944	12.3005	0.349
1426345_at	Prepl	17	85.4617	5	133.347	rs13478539	11.9392	0.381
1426346_at	Prepl	17	85.463	7	83.7587	rs13479374	11.5567	0.397
1426350_at	Mgat2	12	70.2871	17	81.129	rs13483126	8.81773	0.628
1426354_at	Bap1	14	32.0726	7	24.6467	rs13479153	10.7691	0.517
1426358_at	2810468K05Rik	11	77.3437	3	3.77107	rs13476950	11.999	0.357
1426359_at	Zc3h11a	1	135.518	1	128.996	rs6263067	51.8097	2e-06
1426361_at	Zc3h11a	1	135.523	1	128.996	rs6263067	49.7484	9e-06
1426369_at	Mlstd2	7	120.714	7	111.466	rs13479460	16.3255	0.073
1426370_at	Mlstd2	7	120.697	7	111.466	rs13479460	22.0676	0.009
1426377_at	Zfp281	1	138.526	11	8.73673	rs3714397	10.968	0.527
1426382_at	Ppm1b	17	85.4136	6	77.4513	rs3663024	10.6734	0.534
1426407_at	Cugbp1	2	90.8592	7	30.1445	rs8261944	18.4167	0.046
1426411_a_at	Strbp	2	37.442	7	26.7766	rs13479163	19.8571	0.023
1426442_at	Gpm6a	8	56.1452	1	66.1981	gnf01.063.789	10.1741	0.555
1426453_at	Pitrm1	13	6.57768	3	54.84	gnf03.051.474	10.6494	0.598
1426457_at	Slmap	14	27.2328	7	26.7766	rs13479163	18.0485	0.021
1426458_at	Slmap	14	27.2831	14	78.4157	rs6352085	10.8149	0.592
1426461_at	Ugp2	11	21.2212	7	26.7766	rs13479163	15.7476	0.115
1426476_at	Rasa1	13	85.355	11	8.73673	rs3714397	11.1746	0.547
1426477_at	Rasa1	13	85.3557	7	30.1445	rs8261944	21.4958	0.008
1426478_at	Rasa1	13	85.3679	11	8.73673	rs3714397	10.6722	0.62
1426479_a_at	Tnrc5	17	46.8731	7	30.1445	rs8261944	14.2372	0.242
1426481_at	Kelchl	16	17.793	2	5.76364	rs13476330	11.7775	0.517
1426483_at	Prkrir	7	105.866	4	34.2827	CEL-4_34185403	10.3634	0.62
1426491_at	Herc2	7	63.4864	1	66.1981	gnf01.063.789	11.2504	0.585
1426493_a_at	Kifc2	15	76.4979	6	88.9762	rs3142215	13.7224	0.244
1426499_at	Sh3glb2	2	30.2007	7	24.6467	rs13479153	14.7236	0.152
1426525_at	Arid2	15	96.2228	7	26.7766	rs13479163	16.2746	0.101
1426536_at	Narg2	9	69.2803	7	26.7766	rs13479163	18.9939	0.00325
1426544_a_at	Ttc14	3	33.706	7	30.1445	rs8261944	15.0762	0.125
1426559_at	Sbno1	5	124.844	5	123.549	rs13478499	14.5803	0.207
1426562_a_at	Olfm1	2	28.0636	6	65.0374	rs13478801	14.1797	0.194
1426577_a_at	1810054G18Rik	7	31.341	7	30.1445	rs8261944	34.9366	5.15e-05
1426582_at	Atf2	2	73.6556	7	26.7766	rs13479163	17.7149	0.042
1426584_a_at	Sord	2	122.09	2	118.572	UT_2_119.151187	28.933	0.0026
1426593_a_at	Fbxo22	9	55.0721	11	8.73673	rs3714397	11.8278	0.178
1426617_a_at	Ttyh1	7	4.08294	11	8.73673	rs3714397	15.2668	0.17
1426624_a_at	Ypel3	7	133.922	7	30.1445	rs8261944	15.7593	0.135
1426645_at	Hspca	12	111.931	7	26.7766	rs13479163	12.859	0.315
1426649_at	Tmeff1	4	48.6754	16	78.0159	rs4207980	10.7107	0.465
1426659_a_at	Rpl23a	14	34.9839	7	30.1445	rs8261944	12.3863	0.4
1426667_a_at	Unc84a	5	139.721	16	10.5091	rs4161101	11.4912	0.497
1426668_at	Slc30a9	5	67.7465	7	30.4293	rs8251849	15.4943	0.144
1426675_at	Tomm70a	16	57.1541	6	92.586	rs6223362	12.9633	0.24
1426682_at	Cnot6	11	49.485	7	30.1445	rs8261944	20.6404	0.012
1426683_at	Cnot6	11	49.4872	11	8.73673	rs3714397	13.897	0.138
1426684_at	Cnot6	11	49.4863	11	8.73673	rs3714397	11.4043	0.51
1426685_a_at	Cnot6	11	49.4883	X	54.1151	rs13483766	14.9418	0.153
1426692_at	Ccdc97	7	26.4965	7	18.8563	D7Mit57	20.7716	0.034
1426729_at	2900046G09Rik	16	20.7025	15	45.1075	rs13482547	13.5465	0.23
1426738_at	Dgkz	2	91.7732	15	45.1075	rs13482547	10.7804	0.629
1426741_a_at	Fastkd2	1	63.7989	7	34.4076	rs6239372	13.6179	0.204
1426759_at	Map4k3	17	80.9799	7	26.7766	rs13479163	10.9986	0.559
1426764_at	Oaz2	9	65.5357	9	41.2419	D9Mit227	11.6924	0.458
1426766_at	Nlrp1	11	70.8456	11	69.4181	rs13481087	52.8881	1.24e-05
1426777_a_at	Wasl	6	24.5877	16	76.5402	rs4206648	15.3094	0.086
1426791_at	Rusc2	4	43.4394	7	24.6467	rs13479153	14.8601	0.126
1426805_at	Smarca4	9	21.4432	16	78.0159	rs4207980	14.7349	0.147
1426811_at	Ppp2r5b	19	6.22785	15	45.1075	rs13482547	14.527	0.208
1426819_at	Hipk3	2	104.267	7	26.7766	rs13479163	18.0557	0.032
1426820_at	Kiaa0100	11	78.1035	2	160.461	rs13476878	14.3845	0.108
1426824_at	Psme4	11	30.7561	7	26.7766	rs13479163	16.1226	0.132
1426840_at	Ythdf3	3	16.1165	11	8.73673	rs3714397	11.6895	0.314
1426841_at	Ythdf3	3	16.1158	7	30.1445	rs8261944	15.9467	0.152
1426842_at	Ythdf3	3	16.1144	11	8.73673	rs3714397	11.8008	0.47
1426844_a_at	6030457N17Rik	7	34.9744	7	30.4293	rs8251849	17.2226	0.045
1426865_a_at	Ncam1	9	49.3118	9	45.9883	rs13480172	50.2554	8e-06
1426874_at	BC022641	8	108.416	7	26.7766	rs13479163	11.9608	0.421
1426877_a_at	Pb1	14	31.9326	16	89.4217	rs4216581	9.94933	0.447
1426881_at	Ube3c	5	30.002	11	47.9608	rs13481014	12.9991	0.278
1426884_at	1110007A06Rik	6	71.3389	7	26.7766	rs13479163	11.5042	0.438
1426895_at	Zfp191	18	24.1711	7	30.1445	rs8261944	12.3191	0.393
1426900_at	Jmjd1c	10	66.7185	11	8.73673	rs3714397	16.1903	0.091
1426923_at	Hrb	1	82.8917	8	58.8983	rs3659789	11.6924	0.464
1426943_at	Ints1	5	140.227	9	41.2419	D9Mit227	10.7562	0.5
1426948_at	Tpr	1	152.293	7	81.4087	rs3656205	14.0643	0.165
1426956_a_at	Trp53bp1	2	121.024	7	30.1445	rs8261944	18.133	0.045
1426957_at	Trp53bp1	2	121.024	7	26.7766	rs13479163	16.0326	0.123
1426992_at	Xpr1	1	157.123	7	26.7766	rs13479163	15.046	0.14
1426994_at	Phlpp	1	108.29	7	26.7766	rs13479163	18.4087	0.049
1426995_a_at	Gfer	17	24.8302	17	23.9217	rs3023864	19.0896	0.037
1426997_at	Thra	11	98.6259	15	45.1075	rs13482547	16.2342	0.101
1427006_at	Rapgef1	2	29.5953	10	84.3434	rs13480679	19.714	0.019
1427019_at	Ptprz1	6	22.9996	7	26.7766	rs13479163	13.4262	0.271
1427023_at	Phyhipl	10	70.0217	X	80.8499	rs13483868	12.6041	0.301
1427037_at	Eif4g1	16	20.6821	16	10.5091	rs4161101	17.8526	0.047
1427039_at	Epn1	7	5.04924	7	30.1445	rs8261944	16.2608	0.13
1427070_at	AI481716	2	164.618	2	160.461	rs13476878	15.0234	0.139
1427074_at	Pcmtd2	2	181.591	7	26.7766	rs13479163	15.4164	0.125
1427079_at	Mapre3	5	31.1678	7	18.8563	D7Mit57	17.0002	0.049
1427087_at	Luc7l2	6	38.5535	X	35.1443	gnfX.023.543	14.616	0.176
1427110_at	Raver1	9	20.8786	7	30.1445	rs8261944	16.7243	0.086
1427112_at	Ttl	2	128.921	3	53.3577	rs13477113	10.262	0.619
1427117_at	Mtmr3	11	4.3826	16	5.56696	rs4153199	11.9021	0.451
1427122_at	Copg2as2	6	30.7582	18	70.9106	gnf18.069.064	11.8661	0.402
1427143_at	Jarid1b	1	136.527	7	30.1445	rs8261944	11.5998	0.422
1427150_at	Mll3	5	24.8054	4	49.7924	rs13477695	11.9202	0.461
1427157_at	Ccdc85a	11	28.2874	1	73.1444	rs13475920	10.513	0.506
1427167_at	Armcx4	X	131.231	7	24.6467	rs13479153	17.0235	0.039
1427185_at	Mef2a	7	74.3762	7	30.1445	rs8261944	14.0301	0.222
1427186_a_at	Mef2a	7	74.3771	7	30.1445	rs8261944	17.623	0.07
1427190_at	Appl1	14	27.7368	7	30.1445	rs8261944	12.572	0.347
1427230_at	LOC643988	4	155.07	7	30.1445	rs8261944	19.8978	0.026
1427233_at	Tshz1	18	84.1812	16	79.1356	rs4209059	11.2545	0.317
1427235_at	Utx	X	17.8561	1	66.1981	gnf01.063.789	11.0783	0.436
1427241_at	Papolg	11	23.7627	11	19.6458	D11Mit79	14.2413	0.179
1427250_at	Atp2a2	5	122.906	2	160.461	rs13476878	15.5713	0.111
1427254_at	Zfp445	9	122.76	7	26.7766	rs13479163	11.3266	0.45
1427269_at	Sfrs11	3	157.674	7	30.1445	rs8261944	15.6638	0.109
1427280_at	Scn2a1	2	65.6032	11	47.9608	rs13481014	17.409	0.041
1427290_at	Krt2-19	15	101.29	7	26.7766	rs13479163	10.9032	0.525
1427296_at	BC010304	13	48.9751	2	160.461	rs13476878	14.1788	0.193
1427299_at	Rps6ka3	X	155.801	7	30.1445	rs8261944	15.5008	0.163
1427314_at	Tmed7	18	46.7462	7	30.1445	rs8261944	15.3995	0.035
1427319_at	A230046K03Rik	10	83.046	7	30.1445	rs8261944	12.3252	0.199
1427384_at	5430439G14Rik	2	160.773	7	26.7766	rs13479163	21.5925	0.011
1427408_a_at	Thrap3	4	125.851	16	10.5091	rs4161101	11.5259	0.502
1427418_a_at	Hif1a	12	75.0473	7	30.1445	rs8261944	14.6384	0.147
1427448_at	Rabep1	11	70.7545	7	26.7766	rs13479163	14.6289	0.213
1427456_at	Wdfy3	5	102.264	14	70.0009	rs3723413	9.97059	0.629
1427481_a_at	Atp1a3	7	25.7632	7	15.6199	rs6295100	14.8242	0.164
1427484_at	Eml5	12	100.027	7	26.7766	rs13479163	13.2669	0.308
1427486_at	Ptprb	10	115.81	7	26.7766	rs13479163	11.0529	0.386
1427490_at	Abcb7	X	101.479	7	81.4087	rs3656205	11.1941	0.532
1427510_at	Gnai1	5	17.7776	19	38.9008	rs6185741	15.1554	0.13
1427518_at	D10627	8	71.753	8	71.8112	rs8253516	18.0044	0.046
1427522_at	Arhgap20	9	51.6598	7	26.7766	rs13479163	17.9419	0.012
1427544_a_at	Papola	12	107.049	7	26.7766	rs13479163	15.4674	0.077
1427564_at	Diap2	X	126.995	4	49.7924	rs13477695	14.2035	0.233
1427580_a_at	Rian	12	110.889	12	108.001	rs13481636	51.1672	1e-06
1427604_a_at	Atp9a	2	168.463	7	18.8563	D7Mit57	13.6386	0.239
1427661_a_at	Tssc4	7	150.256	7	30.1445	rs8261944	14.1826	0.17
1427670_a_at	Tcf12	9	71.6922	7	26.7766	rs13479163	17.1363	0.055
1427672_a_at	Utx	X	17.8522	7	26.7766	rs13479163	17.2559	0.026
1427720_a_at	Nnp1	10	77.8633	11	8.73673	rs3714397	15.777	0.155
1427754_a_at	Dnm1	2	32.1645	7	15.6199	rs6295100	16.1188	0.108
1427773_a_at	Rabac1	7	25.7571	1	13.3682	rs3655978	12.5724	0.334
1427816_at	Sfrs2	11	116.711	11	89.5675	rs13481150	11.1115	0.547
1427886_at	Pom121	5	135.852	11	8.73673	rs3714397	17.8651	0.051
1427888_a_at	Spna2	2	29.8868	7	26.7766	rs13479163	11.3022	0.438
1427896_at	2400003N08Rik	5	117.542	7	24.6467	rs13479153	11.992	0.484
1427902_at	Srrm2	17	23.9612	17	12.1586	rs3662820	34.7462	0.000846154
1427907_at	1110037F02Rik	4	11.4773	11	47.9608	rs13481014	15.0643	0.145
1427949_at	Zfp294	16	87.3778	7	30.4293	rs8251849	20.4205	0.021
1427950_at	Zfp294	16	87.4091	7	81.4087	rs3656205	12.0101	0.338
1427990_at	Usp45	4	21.7644	10	19.774	rs3688363	11.4439	0.489
1428004_at	C16orf33	11	32.107	11	24.5727	rs3677232	26.4926	0.002
1428070_at	Syvn1	19	6.05313	7	18.8563	D7Mit57	12.9897	0.305
1428075_at	Ndufb4	16	37.6491	2	160.461	rs13476878	15.5843	0.094
1428080_at	Pgam5	5	110.688	2	5.76364	rs13476330	12.3877	0.386
1428084_at	Hrb2	10	111.423	10	27.6975	gnf10.025.923	10.8573	0.558
1428085_at	1110057K04Rik	12	8.292	11	8.73673	rs3714397	14.5588	0.136
1428086_at	Dnm1l	16	16.3124	7	30.1445	rs8261944	15.8207	0.103
1428087_at	Dnm1l	16	16.3136	2	160.461	rs13476878	11.1728	0.421
1428094_at	Lamp2	X	35.7727	7	24.6467	rs13479153	15.7918	0.057
1428096_at	Ipo11	13	107.585	11	42.6618	rs6307831	13.4081	0.248
1428097_at	2510009E07Rik	16	21.6492	7	26.7766	rs13479163	15.5749	0.133
1428103_at	Adam10	9	70.6275	7	26.7766	rs13479163	11.4176	0.287
1428106_at	1300001I01Rik	11	74.4838	19	3.41309	rs13483499	15.4544	0.06
1428115_a_at	Rab2b	14	52.8818	6	135.288	rs13479058	12.6018	0.296
1428118_at	Lrrn6a	9	56.467	7	24.6467	rs13479153	13.7326	0.207
1428124_at	Gtf2e1	16	37.5102	16	73.6306	rs3656776	11.0039	0.561
1428130_at	Lman1	18	66.1544	12	77.2972	rs13481541	13.0325	0.324
1428147_at	Coro7	16	4.62734	9	41.2419	D9Mit227	13.1647	0.263
1428150_at	Coro7	16	4.62872	7	24.6467	rs13479153	20.664	0.027
1428158_at	Akt1s1	7	52.1102	7	30.1445	rs8261944	22.1641	0.014
1428162_at	4933421E11Rik	3	106.539	16	89.7741	rs4217061	11.0331	0.426
1428164_at	Nudt9	5	104.491	2	160.461	rs13476878	12.1454	0.403
1428171_at	Prpf39	12	66.1626	9	123.812	rs8254393	10.4658	0.449
1428190_at	Slc25a1	16	17.9257	7	81.4087	rs3656205	15.0119	0.21
1428193_at	Usp9x	X	12.7499	2	160.461	rs13476878	11.7098	0.322
1428194_at	Usp9x	X	12.7491	7	26.7766	rs13479163	13.3657	0.28
1428198_at	4930578F03Rik	2	120.982	2	118.572	UT_2_119.151187	44.5382	1.21e-05
1428201_at	2310036O22Rik	8	87.5534	2	160.461	rs13476878	13.6925	0.23
1428236_at	Acbd5	2	22.9695	11	8.73673	rs3714397	13.8784	0.124
1428248_at	Nfx1	4	40.9591	10	27.6975	gnf10.025.923	10.6794	0.545
1428251_at	Smchd1	17	71.6939	11	8.73673	rs3714397	14.885	0.083
1428272_at	Eif1b	9	120.403	11	47.9608	rs13481014	12.7164	0.388
1428277_at	Otud6b	4	14.7373	11	8.73673	rs3714397	12.8246	0.277
1428280_at	Fip1l1	5	74.9943	1	154.947	rs13476184	10.1247	0.552
1428287_at	Cul5	9	53.4231	11	8.73673	rs3714397	13.5232	0.207
1428302_at	Mrpl48	7	107.701	7	95.8591	rs13479416	93.3468	3e-06
1428314_at	Pcnp	16	56.0156	11	19.6458	D11Mit79	18.5358	0.039
1428330_at	2610510B01Rik	16	93.8096	10	84.3434	rs13480679	11.2901	0.55
1428335_a_at	Scfd1	12	52.5325	6	85.7832	rs13478871	14.7069	0.181
1428339_at	Nudt21	8	96.5397	1	72.6219	rs3687595	8.83182	0.552
1428353_at	Foxk2	11	121.171	1	68.9351	rs6312657	12.6175	0.325
1428364_at	Scnm1	3	94.9338	3	89.6293	CEL-3_89968332	33.5909	0.000588235
1428371_at	140810	2	120.559	11	8.73673	rs3714397	17.5305	0.039
1428382_at	Smarcc2	10	127.927	13	54.8887	rs13481817	10.3452	0.447
1428385_at	2011-03-08	6	116.359	11	22.9284	rs6283329	11.3629	0.446
1428386_at	Acsl3	1	78.703	12	35.7064	gnf12.033.545	11.0736	0.441
1428388_at	Tnks2	19	36.9668	2	160.461	rs13476878	16.2132	0.023
1428405_at	Hcfc1r1	17	23.8121	17	11.894	rs13482876	13.1489	0.241
1428411_at	Spint1	2	119.433	6	49.5851	rs6155681	10.6833	0.594
1428412_at	Tm9sf3	19	41.2855	7	26.7766	rs13479163	17.2086	0.064
1428429_at	Rgmb	17	15.9439	10	84.3434	rs13480679	12.3789	0.388
1428437_at	Lsm14a	7	35.1297	X	67.7016	rs3157124	10.1847	0.607
1428441_at	Zcd2	3	135.07	7	45.4563	rs13479226	13.7027	0.262
1428457_at	5830472M02Rik	2	163.444	7	26.7766	rs13479163	14.1745	0.189
1428468_at	3110043O21Rik	4	35.1387	4	31.8934	rs6177140	12.0848	0.398
1428471_at	Sorbs1	19	40.3666	11	8.73673	rs3714397	14.6266	0.058
1428474_at	Ppp3cb	14	21.3186	11	8.73673	rs3714397	12.4396	0.303
1428502_at	Actr6	10	89.1748	11	8.73673	rs3714397	12.3729	0.18
1428505_at	2310015N07Rik	7	99.727	16	79.1356	rs4209059	11.5899	0.392
1428510_at	Lphn1	8	86.4653	7	30.1445	rs8261944	18.1497	0.075
1428517_at	Wdfy3	5	102.262	7	26.7766	rs13479163	11.135	0.537
1428540_at	Fam115a	6	42.62	12	82.5076	rs6170344	11.3393	0.461
1428544_at	0610007L01Rik	5	130.714	11	47.9608	rs13481014	13.989	0.259
1428554_a_at	Skiip	12	88.7849	2	160.461	rs13476878	10.178	0.553
1428556_at	2610022G08Rik	6	57.6394	1	128.996	rs6263067	12.4671	0.361
1428561_at	2610002J23Rik	11	100.319	11	11.0711	rs3023249	12.7255	0.338
1428579_at	Fmnl2	2	52.9923	1	66.1981	gnf01.063.789	11.2714	0.439
1428586_at	Tmem41b	7	117.117	11	8.73673	rs3714397	10.3913	0.517
1428594_at	Garnl1	12	56.7043	11	8.73673	rs3714397	15.7087	0.123
1428602_at	Kcnj9	1	174.251	1	173.062	rs8258245	49.9927	3e-06
1428623_at	Plxna1	6	89.2664	6	112.817	rs13478978	12.2378	0.398
1428626_at	Lysmd2	9	75.485	2	160.461	rs13476878	11.1442	0.565
1428629_at	6330417C12Rik	19	40.9919	11	8.73673	rs3714397	24.0587	0.00111111
1428631_a_at	Uqcrc2	7	127.798	6	95.039	rs13478906	16.8104	0.078
1428645_at	Gnai3	3	107.91	7	30.1445	rs8261944	15.1106	0.125
1428649_at	Cand1	10	118.639	7	81.4087	rs3656205	13.6741	0.238
1428652_at	0610010F05Rik	11	23.4739	6	92.586	rs6223362	12.5532	0.365
1428669_at	Bmyc	2	25.5627	15	69.2759	rs13482635	10.345	0.397
1428693_at	2610044O15Rik	17	95.2262	7	111.466	rs13479460	9.47794	0.613
1428697_at	Dpp8	9	64.9299	7	81.4087	rs3656205	13.3629	0.206
1428707_at	Ptms	6	124.864	7	30.1445	rs8261944	21.3311	0.023
1428715_at	Gftp1	6	87.0416	11	8.73673	rs3714397	12.9808	0.269
1428723_at	2310047M10Rik	11	68.8745	7	111.466	rs13479460	14.3036	0.177
1428772_at	Tbk1	10	121.025	7	30.1445	rs8261944	13.2417	0.212
1428779_at	Zbtb41	1	141.349	7	26.7766	rs13479163	17.6667	0.061
1428789_at	Ralgps2	1	158.734	11	8.73673	rs3714397	14.5144	0.179
1428791_at	Ube2h	6	30.1616	3	105.796	UT_3_108.7885	13.8024	0.131
1428804_at	Mfap3l	8	63.1549	8	60.5952	rs6399377	22.9256	0.0055
1428805_at	Slc35e3	10	117.171	2	5.76364	rs13476330	14.5977	0.161
1428806_at	Csnk1g1	9	65.8923	17	81.129	rs13483126	10.9612	0.552
1428813_a_at	Drd1ip	7	147.256	11	4.40873	rs3659787	16.5795	0.08
1428829_at	Dennd1b	1	141.072	11	8.73673	rs3714397	12.8985	0.347
1428836_at	2300009A05Rik	9	63.2467	14	118.847	rs6265743	11.4354	0.503
1428846_at	Ttc14	3	33.7084	11	8.73673	rs3714397	19.1274	0.036
1428847_a_at	Macf1	4	123.027	1	66.1981	gnf01.063.789	15.6673	0.126
1428866_at	2810037O22Rik	14	61.0065	11	8.73673	rs3714397	13.321	0.234
1428883_at	Tmem57	4	134.359	7	30.1445	rs8261944	16.6913	0.087
1428917_at	Stx17	4	48.1989	7	26.7766	rs13479163	16.8587	0.068
1428936_at	Atp2b1	10	98.4497	7	30.1445	rs8261944	14.1433	0.184
1428940_at	Gnaq	19	16.4621	11	4.40873	rs3659787	13.2853	0.241
1428941_at	Zmym2	14	57.5797	7	26.7766	rs13479163	16.9385	0.079
1428967_at	Igf1r	7	75.3767	7	26.7766	rs13479163	12.3249	0.309
1428968_at	3110002L15Rik	9	13.6127	11	8.73673	rs3714397	11.1731	0.453
1428969_at	Kiaa1012	18	20.976	7	30.1445	rs8261944	12.807	0.285
1428971_at	Ccny	18	9.31461	7	30.1445	rs8261944	16.4513	0.073
1428982_at	Atad2b	12	5.0537	7	26.7766	rs13479163	13.0722	0.301
1428985_at	1110020M19Rik	3	132.773	6	85.7832	rs13478871	14.0813	0.118
1429000_at	Phf3	1	30.8593	11	8.73673	rs3714397	10.9113	0.573
1429004_at	Phip	9	82.7601	7	26.7766	rs13479163	17.4288	0.094
1429021_at	Epha4	1	77.3641	1	73.1444	rs13475920	10.3951	0.488
1429038_at	1500034J01Rik	8	73.9986	14	118.847	rs6265743	12.3704	0.407
1429043_at	Smndc1	19	53.4538	11	8.73673	rs3714397	10.7256	0.424
1429044_at	4930541M15Rik	1	138.165	11	47.9608	rs13481014	11.7394	0.29
1429064_at	Dip2c	13	9.66768	9	123.812	rs8254393	9.79378	0.626
1429071_at	Me3	7	96.9972	7	89.4894	rs3658777	82.5662	3e-06
1429085_at	Vezf1	11	87.8967	7	26.7766	rs13479163	13.298	0.312
1429107_at	Zfp650	2	69.8597	2	160.461	rs13476878	11.9366	0.389
1429113_at	Prrt2	7	134.161	15	45.1075	rs13482547	12.2753	0.444
1429121_at	4921517N04Rik	2	23.3664	11	8.73673	rs3714397	13.1281	0.291
1429146_at	6620401M08Rik	7	59.2526	7	34.4076	rs6239372	19.1909	0.02
1429155_at	KIAA1430	8	47.2804	7	26.7766	rs13479163	20.4335	0.024
1429174_at	Wdr34	2	29.8872	11	4.40873	rs3659787	13.1313	0.294
1429178_at	Odz3	8	49.311	6	85.7832	rs13478871	17.2836	0.056
1429187_at	Tmed7	18	46.7481	10	122.416	rs13480802	11.336	0.356
1429192_at	Ski	4	154.529	13	54.8887	rs13481817	12.9838	0.259
1429204_at	Camk2n2	16	20.6193	11	8.73673	rs3714397	11.5605	0.478
1429232_at	Hnrpr	4	135.901	7	26.7766	rs13479163	9.96941	0.442
1429246_a_at	Anxa6	11	54.8049	15	45.1075	rs13482547	15.4012	0.147
1429253_at	Zfp262	4	126.539	7	26.7766	rs13479163	23.441	0.00183333
1429254_at	Aqp11	7	104.878	7	95.8591	rs13479416	59.6324	2e-06
1429327_at	Sdccag1	12	70.4452	X	35.1443	gnfX.023.543	13.7618	0.267
1429330_at	Gabra4	5	71.9626	7	30.1445	rs8261944	14.5689	0.163
1429331_at	4632427E13Rik	7	99.8883	7	89.4894	rs3658777	41.3192	0.0001
1429351_at	Klhl24	16	20.125	7	26.7766	rs13479163	12.0575	0.35
1429362_a_at	Sf3b2	19	5.28758	16	12.3864	rs4162800	15.1428	0.196
1429396_at	2410118P20Rik	7	108.438	7	95.8591	rs13479416	49.644	2.11e-05
1429415_at	Prkcbp1	2	165.611	1	155.968	rs13476187	11.2349	0.453
1429416_at	2900074C18Rik	7	28.4393	11	4.40873	rs3659787	10.6822	0.588
1429431_at	Zfpn1a5	7	138.533	11	8.73673	rs3714397	13.1083	0.078
1429436_at	Prpf40a	2	52.9959	1	73.1444	rs13475920	10.7947	0.507
1429446_at	Sdccag1	12	70.4126	11	22.9284	rs6283329	13.6904	0.208
1429451_at	C8orf37	4	10.8259	17	88.9103	CEL-17_87616892	10.1254	0.565
1429454_at	Gapvd1	2	34.5325	7	26.7766	rs13479163	18.2673	0.054
1429463_at	Prkaa2	4	104.708	7	30.1445	rs8261944	19.817	0.015
1429488_at	Zdhhc21	4	82.4486	7	30.1445	rs8261944	22.9226	0.0035
1429505_at	2310076G13Rik	1	60.3937	7	30.1445	rs8261944	31.5398	0.000244444
1429521_at	Alkbh8	9	3.38575	7	30.1445	rs8261944	13.4626	0.263
1429532_at	Zcwcc1	11	3.58984	13	12.117	rs13459139	10.0398	0.568
1429538_a_at	Sfrs18	4	21.8018	3	3.77107	rs13476950	13.4519	0.228
1429539_at	Bcl2l13	6	120.842	2	160.461	rs13476878	10.5223	0.568
1429560_at	Zfp422-rs1	17	33.4402	12	82.5076	rs6170344	11.1457	0.549
1429579_at	Gucy1a2	9	3.90539	11	8.73673	rs3714397	13.9376	0.183
1429623_at	Zfp644	5	107.046	7	30.1445	rs8261944	11.7351	0.463
1429625_at	Cdkl5	X	157.24	7	26.7766	rs13479163	16.4903	0.103
1429634_at	Zfp580	7	5.00473	11	8.73673	rs3714397	11.0718	0.459
1429637_at	1110032E23Rik	3	79.7498	3	89.6293	CEL-3_89968332	34.5111	0.000232558
1429684_at	5830472M02Rik	2	163.442	10	122.416	rs13480802	11.7535	0.442
1429712_at	Etohi1	2	175.408	13	12.117	rs13459139	10.8617	0.224
1429735_at	1110003F05Rik	17	10.3978	4	49.7924	rs13477695	11.3428	0.439
1429771_at	3110073H01Rik	15	9.13165	11	8.73673	rs3714397	19.1207	0.035
1429776_a_at	Dnajb6	5	30.0801	11	8.73673	rs3714397	12.1634	0.314
1429779_at	Eif2c4	4	126.17	7	30.1445	rs8261944	15.8027	0.074
1429847_a_at	4833418A01Rik	2	70.9254	7	30.1445	rs8261944	12.0087	0.479
1429859_a_at	Arl2bp	8	97.1942	1	21.6236	rs6253968	10.4777	0.549
1429862_at	2310026J01Rik	2	119.992	2	118.572	UT_2_119.151187	42.043	6e-06
1429901_at	6330571D19Rik	10	31.4095	X	67.7016	rs3157124	11.1869	0.389
1429918_at	Arhgap20	9	51.6614	7	26.7766	rs13479163	22.5685	0.011
1429940_at	Cdc73	1	145.446	11	19.6458	D11Mit79	14.8666	0.174
1430128_a_at	Reep6	10	79.7987	2	9.74751	gnf02.006.767	10.6795	0.602
1430191_at	Ddef1	15	64.1183	7	81.4087	rs3656205	12.5907	0.358
1430293_a_at	1300006N24Rik	9	20.8721	11	4.40873	rs3659787	15.2159	0.097
1430309_at	Nipbl	15	8.31583	5	22.7227	gnf05.017.151	14.2992	0.094
1430358_at	Becn1	11	101.147	1	189.744	rs3666905	11.9941	0.459
1430375_a_at	Ccl27	4	41.718	4	44.3385	gnf04.041.337	25.7481	0.00047619
1430394_a_at	Abcb9	5	124.524	9	41.2419	D9Mit227	13.7323	0.278
1430395_at	4933409K03Rik	1	163.081	7	95.8591	rs13479416	15.6812	0.072
1430474_a_at	Mtch2	2	90.6956	10	27.6975	gnf10.025.923	10.4422	0.583
1430538_at	2210013O21Rik	X	150.16	2	169.644	rs3143843	12.6258	0.272
1430561_at	5730496F10Rik	3	137.571	7	30.1445	rs8261944	10.5261	0.614
1430583_at	Nrcam	12	45.7006	7	26.7766	rs13479163	11.9991	0.476
1430692_a_at	Sel1h	12	93.0477	12	80.8874	gnf12.078.433	13.2927	0.214
1430752_at	C330006D17Rik	9	7.8362	16	74.8004	rs4205157	9.59367	0.619
1430780_a_at	Pmm1	15	81.7867	11	47.9608	rs13481014	13.0391	0.368
1431028_a_at	Pank1	19	34.8867	7	26.7766	rs13479163	19.9348	0.025
1431030_a_at	Rnf14	18	38.4594	10	123.018	rs6282839	10.547	0.617
1431050_at	Rps6ka5	12	101.788	11	8.73673	rs3714397	10.8236	0.478
1431056_a_at	Lpl	8	71.4251	8	71.8112	rs8253516	32.1543	0.000140845
1431064_at	Dpp8	9	64.9265	16	67.8069	rs3695481	10.5902	0.626
1431170_at	Efna3	3	89.1183	17	23.9217	rs3023864	10.7626	0.196
1431191_a_at	Syt1	10	108.021	16	17.5769	rs4165069	10.7779	0.6
1431196_at	Atp2c1	9	105.362	9	105.498	rs6205631	15.2816	0.1
1431206_at	5730601F06Rik	9	20.3013	10	68.84	rs13480638	11.1358	0.457
1431226_a_at	Fndc4	5	31.5954	16	38.2971	rs4151928	16.3615	0.122
1431229_at	Cry1	10	90.0399	12	80.8874	gnf12.078.433	11.2316	0.378
1431232_a_at	Mga	2	119.791	2	118.572	UT_2_119.151187	47.9278	0
1431248_at	5031426D15Rik	2	6.84586	12	37.3788	gnf12.035.312	12.8943	0.276
1431285_at	Mgrn1	16	4.93689	16	12.3864	rs4162800	15.4665	0.169
1431345_a_at	Taf1b	12	25.2319	12	16.8539	rs6180964	15.7966	0.1
1431381_at	3110005L24Rik	9	50.4695	11	58.0605	rs13481045	12.7704	0.247
1431606_a_at	Angel2	1	192.761	7	30.1445	rs8261944	14.0674	0.218
1431630_a_at	Klf3	5	65.2133	7	34.4076	rs6239372	10.449	0.592
1431655_a_at	Hapln1	6	40.3023	7	34.4076	rs6239372	12.1877	0.304
1431665_a_at	Timm8b	9	50.4121	14	118.847	rs6265743	13.1857	0.254
1431686_a_at	Gmfb	14	47.4306	7	30.1445	rs8261944	12.3975	0.406
1431734_a_at	Dnajb4	3	151.848	7	30.1445	rs8261944	16.8917	0.055
1431749_a_at	Rasgrp1	2	117.124	16	17.5769	rs4165069	13.6761	0.227
1431921_a_at	Stag1	9	100.857	7	30.1445	rs8261944	12.4377	0.378
1432016_a_at	Idh3a	9	54.4512	11	8.73673	rs3714397	14.6528	0.218
1432042_a_at	Smu1	4	40.6911	13	54.8887	rs13481817	14.7444	0.107
1432130_a_at	Ttc14	3	33.7021	7	30.1445	rs8261944	11.5419	0.554
1432273_a_at	Dfy	1	175.262	1	173.062	rs8258245	54.6054	5e-06
1432344_a_at	Aplp2	9	30.9795	10	122.416	rs13480802	15.5288	0.116
1432464_a_at	2310057J16Rik	8	3.60829	7	15.6199	rs6295100	15.2632	0.133
1432478_a_at	Ibrdc3	4	128.758	X	80.8499	rs13483868	15.4764	0.158
1432712_at	4732486J07Rik	3	85.6919	1	73.1444	rs13475920	10.1703	0.616
1433110_at	Kcnq5	1	21.9422	1	43.6869	rs13459182	11.0422	0.583
1433300_at	Il1rapl1	X	84.9262	4	49.7924	rs13477695	14.1302	0.144
1433441_at	Fbxl5	5	44.136	11	8.73673	rs3714397	9.76854	0.486
1433452_at	Fbxl17	X	8.47154	16	69.6854	rs4199265	12.2484	0.3
1433453_a_at	Abtb2	2	103.558	11	8.73673	rs3714397	11.6229	0.36
1433464_at	Ipo13	4	117.567	X	80.8499	rs13483868	10.3315	0.582
1433475_a_at	Ahcp	13	46.7732	11	4.40873	rs3659787	11.1901	0.518
1433507_a_at	Hmgn2	4	133.521	4	133.28	rs6404906	58.835	4.59e-05
1433514_at	Etnk1	6	143.156	7	26.7766	rs13479163	12.1832	0.388
1433516_a_at	Myeov2	1	94.5338	14	118.447	rs13482396	11.9522	0.348
1433519_at	Nucks1	1	133.832	7	26.7766	rs13479163	14.238	0.218
1433524_at	AU042671	5	121.818	10	84.3434	rs13480679	12.3027	0.318
1433531_at	Acsl4	X	138.753	6	90.3235	rs3661039	10.7546	0.478
1433532_a_at	Mbp	18	82.7547	1	173.062	rs8258245	11.5558	0.354
1433534_a_at	Cct2	10	116.488	11	22.9284	rs6283329	11.1076	0.363
1433543_at	Anln	9	22.1365	8	29.0831	rs13479665	11.1499	0.494
1433552_a_at	Polr2b	5	77.7773	7	30.4293	rs8251849	17.8938	0.022
1433556_at	Centa1	5	139.748	7	30.1445	rs8261944	18.4952	0.032
1433561_at	Centb2	16	31.0925	11	8.73673	rs3714397	12.8292	0.248
1433571_at	Serinc5	13	93.4813	1	73.1444	rs13475920	12.5104	0.282
1433572_a_at	Fam120a	13	48.9746	7	30.1445	rs8261944	23.0916	0.0105
1433603_at	Ndufs6	13	73.4574	11	47.9608	rs13481014	12.0612	0.374
1433612_at	Ap2s1	7	17.3326	14	118.847	rs6265743	14.8195	0.123
1433613_at	Pank3	11	35.6042	6	88.9762	rs3142215	20.3684	0.016
1433640_at	Fubp1	3	151.899	11	8.73673	rs3714397	14.4793	0.145
1433643_at	Cacna2d1	5	15.8798	2	160.461	rs13476878	21.8599	0.00333333
1433648_at	Spag9	11	93.9869	7	26.7766	rs13479163	12.13	0.486
1433654_at	Mgea5	19	45.8248	7	30.1445	rs8261944	11.1325	0.54
1433655_at	Rnf141	7	117.957	7	30.1445	rs8261944	19.8404	0.005
1433659_at	D2Ertd435e	2	121.024	2	118.572	UT_2_119.151187	28.3398	0.002
1433660_at	D2Ertd435e	2	121.023	2	118.572	UT_2_119.151187	40.3336	7e-06
1433665_at	Vps41	13	18.9581	6	95.039	rs13478906	16.6303	0.102
1433679_at	Fubp3	2	31.4725	12	35.7064	gnf12.033.545	11.1725	0.465
1433706_a_at	Ptplad1	9	64.8349	6	95.039	rs13478906	18.279	0.024
1433707_at	Gabra4	5	71.9612	7	26.7766	rs13479163	21.5281	0.012
1433712_at	AW555464	12	113.984	X	80.8499	rs13483868	12.4852	0.347
1433724_at	D15Ertd621e	15	58.2876	7	26.7766	rs13479163	13.2607	0.294
1433726_at	2310035C23Rik	1	107.651	7	30.1445	rs8261944	18.5437	0.047
1433737_at	Uhmk1	1	172.124	7	26.7766	rs13479163	15.5369	0.097
1433746_at	Wdr3	3	99.9421	11	22.9284	rs6283329	12.2157	0.366
1433751_at	Slc39a10	1	53.4532	2	160.461	rs13476878	10.545	0.605
1433754_at	Mbnl2	14	120.83	7	30.1445	rs8261944	16.0867	0.129
1433755_at	Mier1	4	102.838	11	8.73673	rs3714397	15.4709	0.039
1433759_at	Dpy19l1	9	24.2163	6	59.7363	gnf06.058.959	10.0378	0.622
1433761_at	Pde4dip	3	97.543	12	35.7064	gnf12.033.545	14.2307	0.051
1433765_at	Ube2o	11	116.399	15	90.7567	rs3717268	10.8194	0.542
1433767_at	Kiaa0317	12	86.2591	7	26.7766	rs13479163	11.8473	0.466
1433771_at	Fam108b1	19	21.7595	10	27.6975	gnf10.025.923	11.5207	0.238
1433772_at	Hspa13	16	75.7555	11	8.73673	rs3714397	10.303	0.585
1433773_at	Rrm2b	15	37.8538	6	77.4513	rs3663024	10.0356	0.539
1433776_at	Lhfp	3	53.0652	17	23.9217	rs3023864	7.61518	0.584
1433778_at	Tnks	8	35.8896	7	26.7766	rs13479163	16.9229	0.07
1433781_a_at	Cldn12	5	5.50516	7	30.4293	rs8251849	17.1124	0.041
1433784_at	9030612M13Rik	17	32.9025	11	8.73673	rs3714397	15.4384	0.105
1433785_at	Mobp	9	120.09	2	122.25	rs3686617	11.3007	0.469
1433791_at	Rab9b	X	133.393	11	22.9284	rs6283329	12.8605	0.281
1433794_at	Als4	2	29.0374	7	26.7766	rs13479163	13.4973	0.07
1433802_at	Tmem151	19	5.08083	7	30.1445	rs8261944	20.6463	0.012
1433808_at	D330001F17Rik	15	76.2824	1	182.12	rs13476267	10.5978	0.526
1433833_at	Fndc3b	3	27.3153	7	111.466	rs13479460	10.7718	0.514
1433834_at	2011-03-06	15	31.3857	7	26.7766	rs13479163	13.1026	0.338
1433848_at	Cdc27	11	104.365	3	3.77107	rs13476950	16.7128	0.039
1433852_at	Kidins220	12	25.7438	2	160.461	rs13476878	13.8993	0.182
1433855_at	Abat	16	8.6211	7	26.7766	rs13479163	14.0599	0.215
1433856_at	Hisppd1	1	99.6028	11	8.73673	rs3714397	12.0176	0.309
1433871_at	R3hdm	1	130.134	7	26.7766	rs13479163	15.0667	0.161
1433872_at	2410042D21Rik	2	112.254	11	8.73673	rs3714397	14.6278	0.092
1433879_a_at	Miss	14	47.9422	14	40.9145	rs13482156	36.3772	0.000108696
1433884_at	Syt1	10	107.935	2	160.461	rs13476878	11.6238	0.439
1433890_a_at	Bat3	17	35.2827	7	15.6199	rs6295100	15.2619	0.115
1433897_at	AI597468	10	84.5797	11	8.73673	rs3714397	16.4475	0.025
1433901_at	Gpiap1	2	103.607	7	30.1445	rs8261944	17.0207	0.011
1433903_at	Prps1l1	12	58.3428	7	30.4293	rs8251849	13.9906	0.141
1433908_a_at	Cttn	7	151.622	7	111.466	rs13479460	14.597	0.148
1433910_at	Zcchc6	13	59.8733	7	30.1445	rs8261944	15.6761	0.118
1433931_at	Thrap5	10	79.3731	X	80.8499	rs13483868	10.9955	0.548
1433934_at	Sec24a	11	51.5058	7	30.4293	rs8251849	12.7362	0.352
1433945_at	5730507A09Rik	7	71.901	7	56.3922	gnf07.050.858	16.5337	0.08
1433965_at	Atp8a1	5	68.0095	11	11.0711	rs3023249	13.0979	0.338
1433968_a_at	Megf9	4	70.09	7	26.7766	rs13479163	17.7271	0.042
1433970_at	Bola3	6	83.3013	16	69.6854	rs4199265	10.5522	0.576
1433978_at	4930430F08Rik	10	100.035	X	35.1443	gnfX.023.543	10.8033	0.388
1433997_at	2410127E18Rik	6	30.4046	2	160.461	rs13476878	18.9	0.039
1433998_at	4933427D14Rik	11	71.9676	11	69.4181	rs13481087	25.7346	0.000625
1434011_a_at	Ints5	19	8.97227	7	30.4293	rs8251849	12.6388	0.319
1434013_at	Ablim3	18	61.9593	12	35.3471	rs13481388	10.865	0.531
1434018_at	BC043098	1	34.8702	7	26.7766	rs13479163	16.2445	0.104
1434021_at	C230096C10Rik	4	138.933	4	133.28	rs6404906	36.0222	7.87e-05
1434022_at	Zbtb33	X	35.5496	11	22.9284	rs6283329	11.8441	0.308
1434026_at	Atp8b2	3	89.7437	10	84.3434	rs13480679	13.5515	0.214
1434032_at	Centg3	5	23.9886	13	54.8887	rs13481817	15.1461	0.141
1434038_at	Dnajc13	9	104.054	7	26.7766	rs13479163	12.2775	0.348
1434039_at	Appbp2	11	85.0009	1	73.1444	rs13475920	11.3677	0.343
1434041_at	Appbp2	11	85.0016	7	26.7766	rs13479163	21.7173	0.0095
1434060_at	Herc1	9	66.356	7	132.836	rs3716088	12.7446	0.409
1434062_at	Rabgap1l	1	162.15	11	19.6458	D11Mit79	12.462	0.409
1434075_at	C16orf52	7	127.877	7	30.1445	rs8261944	18.1874	0.055
1434077_at	Wdr37	13	8.80443	7	30.1445	rs8261944	12.2484	0.323
1434080_at	Aebp2	6	140.601	11	8.73673	rs3714397	12.0254	0.324
1434084_at	Zfp426	9	20.2995	11	8.73673	rs3714397	11.9621	0.295
1434093_at	4930506D23Rik	7	74.3728	1	73.1444	rs13475920	10.9188	0.362
1434095_at	Unc5a	13	55.1068	7	30.1445	rs8261944	12.2968	0.39
1434097_at	D10627	8	71.7539	8	60.5952	rs6399377	13.4202	0.168
1434106_at	Epm2aip1	9	111.179	7	30.1445	rs8261944	12.7908	0.215
1434108_at	Fbxo11	17	88.3905	11	8.73673	rs3714397	13.3198	0.164
1434111_at	Lphn2	3	148.479	7	26.7766	rs13479163	17.7746	0.053
1434112_at	Lphn2	3	148.48	7	26.7766	rs13479163	14.7922	0.199
1434132_at	Spg8	15	59.1636	7	26.7766	rs13479163	24.902	0.000526316
1434148_at	Tcf4	18	69.847	18	70.9106	gnf18.069.064	15.5321	0.044
1434155_a_at	2310061I04Rik	17	36.0299	11	47.9608	rs13481014	13.0766	0.345
1434178_at	Mll3	5	24.7783	7	26.7766	rs13479163	11.7357	0.443
1434181_at	Plekhc1	14	46.0795	2	160.461	rs13476878	15.9409	0.05
1434185_at	Acac	11	84.2147	11	83.5246	rs13481128	33.3361	0.000416667
1434187_at	Alg11	8	23.1816	8	60.5952	rs6399377	10.8477	0.485
1434197_at	Atrn	2	130.855	6	85.7832	rs13478871	11.9509	0.431
1434207_at	2900057K09Rik	7	107.069	7	95.8591	rs13479416	35.7928	1e-06
1434215_at	Pds5a	5	66.0005	11	8.73673	rs3714397	22.4724	0.01
1434222_at	Sipa1l1	12	83.5503	3	54.9585	gnf03.051.587	11.7938	0.36
1434223_at	1810007P19Rik	4	125.764	15	90.7567	rs3717268	11.3876	0.272
1434238_at	Taf2	15	54.847	11	8.73673	rs3714397	13.2983	0.281
1434272_at	Cpeb2	5	43.6805	11	8.73673	rs3714397	12.4072	0.267
1434284_at	Bdp1	13	100.788	7	26.7766	rs13479163	19.8945	0.024
1434285_at	Frmd4a	2	4.5345	7	30.1445	rs8261944	15.582	0.111
1434286_at	Trps1	15	50.4867	4	49.7924	rs13477695	11.7298	0.309
1434288_at	Bivm	1	44.2008	6	77.4513	rs3663024	13.1676	0.308
1434291_a_at	Serf1	13	100.884	17	31.3616	rs13482947	14.0833	0.126
1434292_at	E130013N09Rik	2	158.211	2	157.687	rs3691210	73.6338	8e-06
1434298_at	Zeb2	2	44.8429	4	49.7924	rs13477695	9.58187	0.577
1434320_at	Arhgap12	18	6.0421	7	26.7766	rs13479163	15.9667	0.097
1434344_at	Gpkow	X	7.28681	16	91.559	rs4219239	10.741	0.606
1434352_at	B630005N14Rik	6	13.577	11	8.73673	rs3714397	10.904	0.59
1434362_at	AW550831	1	158.355	1	155.968	rs13476187	74.5849	2e-06
1434373_at	Fam168a	7	107.99	10	67.2164	rs13480630	11.5838	0.506
1434374_at	B930006L02Rik	7	107.987	7	95.8591	rs13479416	56.6642	5e-06
1434375_at	KIAA0280	7	107.988	7	95.8591	rs13479416	97.1967	1.03e-05
1434383_at	Pja2	17	64.6304	11	8.73673	rs3714397	13.8911	0.169
1434389_at	Sos1	17	80.7938	13	45.9127	rs3725387	11.3721	0.518
1434390_at	Hnrpu	1	180.252	7	26.7766	rs13479163	13.9281	0.242
1434391_at	Mrpl48	7	107.729	7	26.7766	rs13479163	10.3533	0.613
1434392_at	Usp34	11	23.3892	7	26.7766	rs13479163	14.5944	0.221
1434393_at	Usp34	11	23.3841	7	26.7766	rs13479163	18.034	0.043
1434395_at	Man1b	3	100.366	7	26.7766	rs13479163	21.5188	0.025
1434397_at	Zdhhc17	10	110.379	7	26.7766	rs13479163	13.7334	0.271
1434404_at	C030011O14Rik	3	151.937	7	26.7766	rs13479163	14.7817	0.116
1434405_at	Fnip1	11	54.3298	1	73.1444	rs13475920	10.8862	0.622
1434415_at	MGC15476	7	17.4721	11	8.73673	rs3714397	14.3639	0.182
1434417_at	Solh	17	26.0955	7	30.1445	rs8261944	16.0777	0.111
1434446_at	D630014A15Rik	8	3.15098	11	24.5727	rs3677232	18.9272	0.041
1434451_at	Atxn1	13	45.6452	7	34.4076	rs6239372	15.025	0.207
1434460_at	Bbs4	9	59.1702	10	27.6975	gnf10.025.923	13.3451	0.132
1434467_at	Atcay	10	80.6693	15	28.9905	rs3702361	11.5908	0.39
1434468_at	Otud4	8	82.201	7	26.7766	rs13479163	16.5432	0.083
1434469_at	Otud4	8	82.1997	7	26.7766	rs13479163	11.8896	0.399
1434470_at	Syt13	2	92.7953	13	12.117	rs13459139	12.1048	0.304
1434474_at	Abca5	11	110.131	3	54.84	gnf03.051.474	12.3823	0.38
1434475_at	Ppig	2	69.591	7	30.1445	rs8261944	19.774	0.037
1434476_at	Crtc1	8	72.9064	7	35.0486	rs13479188	20.053	0.021
1434477_at	Mkrn1	10	17.6206	11	8.73673	rs3714397	11.2599	0.418
1434499_a_at	Ldh2	6	142.439	16	69.6854	rs4199265	12.2378	0.36
1434507_at	Npepl1	2	173.948	7	26.7766	rs13479163	15.4692	0.047
1434509_at	AI844632	11	54.5122	7	26.7766	rs13479163	19.7819	0.027
1434521_at	Rfxdc2	9	72.4701	10	68.84	rs13480638	12.062	0.401
1434554_at	Trim37	11	87.0324	7	26.7766	rs13479163	12.6417	0.359
1434571_at	Vps13b	15	35.8604	7	26.7766	rs13479163	16.4643	0.096
1434582_at	Erc2	14	29.2912	7	30.1445	rs8261944	17.3599	0.098
1434593_at	Eif5a2	3	28.6972	6	85.7832	rs13478871	13.9648	0.195
1434597_at	Larp5	13	9.17307	6	98.0436	gnf06.096.938	14.1046	0.147
1434599_a_at	Tjp2	19	24.1692	16	89.7741	rs4217061	10.4527	0.477
1434607_at	Ddx52	11	83.773	7	35.0486	rs13479188	11.2411	0.425
1434643_at	Tbl1x	X	74.9008	X	69.2812	DXMit1	15.8705	0.137
1434648_a_at	Ccm2	11	6.49659	12	100.967	D12Mit231	15.5547	0.144
1434649_at	Ccm2	11	6.49617	6	112.817	rs13478978	13.8569	0.254
1434654_at	Cog3	14	76.1023	7	30.4293	rs8251849	20.3107	0.019
1434657_at	Gls	1	52.2204	2	160.461	rs13476878	14.7077	0.181
1434659_at	Avl9	6	56.7113	11	8.73673	rs3714397	20.1458	0.011
1434671_at	Ptpn4	1	121.549	7	26.7766	rs13479163	18.1369	0.069
1434676_at	Mtmr9	14	64.1395	7	26.7766	rs13479163	11.8188	0.415
1434685_at	Lppr4	3	117.022	1	73.1444	rs13475920	9.8493	0.629
1434691_at	Sfrs2ip	15	96.2422	7	30.1445	rs8261944	16.6487	0.023
1434703_at	Extl3	14	65.671	7	35.0486	rs13479188	12.4387	0.238
1434706_at	Vcpip1	1	9.71334	7	111.466	rs13479460	11.4195	0.458
1434707_at	Sbf1	15	89.1191	19	3.41309	rs13483499	17.3736	0.04
1434709_at	Nrcam	12	45.6994	7	26.7766	rs13479163	18.0207	0.023
1434714_at	Ero1lb	13	12.7013	7	34.4076	rs6239372	11.6412	0.213
1434715_at	1600014C10Rik	7	38.9821	1	173.062	rs8258245	10.5681	0.434
1434728_at	Gria3	X	39.0313	7	30.1445	rs8261944	11.9458	0.467
1434744_at	Yrdc	4	124.532	11	47.9608	rs13481014	12.4445	0.334
1434750_at	Exoc3	13	74.3095	7	71.5705	rs13479326	10.914	0.353
1434759_at	Lrrtm3	10	63.3921	12	82.5076	rs6170344	11.6317	0.373
1434766_at	Prkaa2	4	104.703	7	34.4076	rs6239372	12.6654	0.326
1434788_at	D930050A07Rik	14	65.8114	7	26.7766	rs13479163	18.2345	0.044
1434825_at	2810442I22Rik	5	143.201	13	54.8887	rs13481817	25.4274	0.00366667
1434829_at	Cbl	9	43.9513	11	42.2154	rs3693664	12.7117	0.324
1434831_a_at	Foxo3	10	41.9017	7	26.7766	rs13479163	19.1932	0.02
1434840_at	Hrb	1	82.897	7	26.7766	rs13479163	10.1299	0.56
1434841_at	A430093A21Rik	1	63.0944	X	67.7016	rs3157124	11.8015	0.49
1434843_at	Fam179b	12	66.1231	11	8.73673	rs3714397	10.9159	0.578
1434860_at	Narg3	4	11.1885	9	123.812	rs8254393	13.9576	0.173
1434861_at	Pcdh7	12	66.0399	11	8.73673	rs3714397	11.9819	0.363
1434879_at	Cdc34	10	79.1478	11	4.40873	rs3659787	18.6193	0.025
1434882_at	Mtdh	15	34.0705	11	8.73673	rs3714397	10.5909	0.531
1434890_at	Opa1	16	29.6541	7	26.7766	rs13479163	12.9333	0.24
1434902_at	Rnf157	11	116.2	7	15.6199	rs6295100	12.1537	0.363
1434908_at	AI480556	7	52.2583	15	45.1075	rs13482547	10.7528	0.619
1434914_at	Rab6b	9	103.087	7	26.7766	rs13479163	11.4767	0.46
1434925_at	4833424O15Rik	3	117.392	11	8.73673	rs3714397	13.9741	0.173
1434930_at	Tpcn1	5	120.984	15	45.1075	rs13482547	14.6025	0.161
1434935_at	Aak1	6	86.9531	7	30.1445	rs8261944	15.28	0.158
1434937_at	Phr1	14	103.513	5	55.1204	rs6237838	10.7464	0.619
1434944_at	Dm15	7	19.6787	7	18.8563	D7Mit57	16.2706	0.097
1434946_at	Rbj	12	4.10863	10	101.805	rs13480734	11.555	0.417
1434947_at	Kif3c	12	3.40591	2	160.461	rs13476878	13.3917	0.176
1434948_at	A830046J09Rik	19	59.9796	7	26.7766	rs13479163	12.7693	0.299
1434955_at	2011-03-01	8	68.9938	6	85.7832	rs13478871	15.7725	0.093
1434958_at	Sacs	14	61.8337	7	26.7766	rs13479163	11.8451	0.447
1434977_at	4933403F05Rik	18	68.4255	7	111.466	rs13479460	11.5315	0.28
1434996_at	Slc25a16	10	62.4087	7	30.4293	rs8251849	12.6199	0.201
1435000_at	Gspt1	16	11.2167	2	169.644	rs3143843	15.2033	0.084
1435001_at	Plaa	4	94.2339	11	8.73673	rs3714397	12.9202	0.177
1435002_at	1810022O10Rik	7	36.5574	7	30.1445	rs8261944	14.8506	0.128
1435003_at	Pik4ca	16	17.2805	5	133.347	rs13478539	13.7403	0.221
1435014_at	Rab39b	X	72.8177	7	30.4293	rs8251849	11.7999	0.326
1435016_at	Als2cr3	1	58.9577	1	73.1444	rs13475920	11.2223	0.562
1435021_at	Gabrb3	7	65.0836	7	26.7766	rs13479163	16.8616	0.072
1435023_at	Itsn2	12	4.68573	11	8.73673	rs3714397	13.7725	0.145
1435025_at	Ogfod1	8	96.5913	11	8.73673	rs3714397	11.0695	0.556
1435030_at	Upf2	2	5.97721	11	8.73673	rs3714397	11.8303	0.391
1435051_at	Wdr44	X	23.3826	6	85.7832	rs13478871	12.0581	0.34
1435059_at	Ddef1	15	63.9185	11	8.73673	rs3714397	11.4018	0.513
1435060_at	Tmod2	9	75.4137	11	8.73673	rs3714397	12.778	0.176
1435074_at	Tmem106b	6	13.0387	7	26.7766	rs13479163	15.4096	0.175
1435075_at	Tmem106b	6	13.0368	2	160.461	rs13476878	12.5508	0.347
1435078_at	Tanc2	11	105.79	7	26.7766	rs13479163	11.8607	0.443
1435083_at	Ctxn	8	4.25787	7	30.1445	rs8261944	14.8756	0.199
1435088_at	Nsd1	13	55.4192	1	82.7835	rs13475954	11.4928	0.471
1435095_at	C030009O12Rik	5	72.5397	7	30.1445	rs8261944	15.2932	0.164
1435129_at	Ptp4a2	4	129.516	4	129.074	rs3023009	52.3972	3e-05
1435134_at	Aadacl1	3	27.1409	7	81.4087	rs3656205	13.8972	0.198
1435136_at	C130020C13Rik	5	34.2184	7	26.7766	rs13479163	10.6496	0.624
1435139_at	Narg1	3	51.2784	7	26.7766	rs13479163	16.0625	0.091
1435145_at	Igsf4d	16	66.6614	7	30.1445	rs8261944	16.5309	0.117
1435157_at	5830454D03Rik	8	27.1322	2	160.461	rs13476878	12.1702	0.282
1435163_at	9030612M13Rik	17	32.9103	4	49.7924	rs13477695	12.3349	0.398
1435169_at	A930001N09Rik	17	26.9115	11	4.40873	rs3659787	11.5721	0.402
1435173_at	Ate1	7	137.535	7	30.1445	rs8261944	11.5818	0.315
1435174_at	Rsbn1	3	103.77	7	30.1445	rs8261944	14.7572	0.176
1435181_at	Lin54	5	100.871	9	123.812	rs8254393	11.4508	0.474
1435183_at	Tbkbp1	11	96.9975	7	30.1445	rs8261944	20.4422	0.035
1435190_at	Chl1	6	103.682	7	30.1445	rs8261944	18.5691	0.029
1435230_at	Ankrd12	17	66.3169	2	168.215	CEL-2_168586738	10.6522	0.505
1435231_at	Coq4	2	29.6523	16	69.6854	rs4199265	11.2351	0.409
1435233_at	Ncoa2	1	13.1292	7	26.7766	rs13479163	13.2015	0.301
1435234_at	Ncoa2	1	13.1314	7	81.4087	rs3656205	11.23	0.514
1435235_at	Txnl1	18	63.8224	7	24.6467	rs13479153	12.0582	0.264
1435240_at	Baz2b	2	59.7375	7	26.7766	rs13479163	12.6043	0.343
1435241_at	Heatr5a	12	52.977	11	8.73673	rs3714397	12.0937	0.274
1435242_at	Aprin	5	151.611	7	26.7766	rs13479163	15.1763	0.164
1435250_at	Ints8	4	11.1409	11	8.73673	rs3714397	11.9198	0.321
1435251_at	Snx13	12	35.8318	7	26.7766	rs13479163	19.7709	0.033
1435261_at	Tmtc1	6	148.181	5	133.347	rs13478539	10.8829	0.582
1435266_at	A930041I02Rik	2	38.922	7	26.7766	rs13479163	15.6066	0.07
1435274_at	Spopl	2	23.3618	11	8.73673	rs3714397	11.3699	0.472
1435286_at	Epha5	5	84.4839	6	77.4513	rs3663024	10.692	0.591
1435295_at	Dopey1	9	86.4477	11	47.9608	rs13481014	12.8968	0.241
1435308_at	AU067636	4	25.5366	7	26.7766	rs13479163	14.8093	0.169
1435319_at	Ihpk2	9	108.709	2	160.461	rs13476878	11.5662	0.451
1435326_at	Lpgat1	1	193.608	7	26.7766	rs13479163	14.8718	0.184
1435327_at	Lpgat1	1	108.935	7	26.7766	rs13479163	11.4411	0.547
1435368_a_at	Parp1	1	182.531	6	95.039	rs13478906	10.5117	0.533
1435377_at	2410002O22Rik	13	104.932	11	8.73673	rs3714397	18.9842	0.013
1435387_at	Slc2a13	15	91.0982	7	26.7766	rs13479163	14.6456	0.187
1435389_at	Reps2	X	158.85	7	26.7766	rs13479163	13.3031	0.334
1435392_at	Wdr17	8	55.7151	7	30.1445	rs8261944	16.8436	0.06
1435397_at	Zbtb44	9	30.8829	9	123.812	rs8254393	14.2621	0.182
1435398_at	Stxbp5	10	9.47769	1	82.7835	rs13475954	11.541	0.375
1435432_at	Centg2	1	91.7858	3	89.6293	CEL-3_89968332	11.694	0.39
1435433_at	Centg2	1	91.7868	4	49.7924	rs13477695	12.1059	0.381
1435435_at	Cttnbp2	6	18.3167	11	8.73673	rs3714397	14.8195	0.15
1435440_at	Pdzk8	19	59.3717	7	26.7766	rs13479163	20.4372	0.023
1435444_at	Atf6	1	172.635	11	8.73673	rs3714397	11.1445	0.558
1435445_at	Ccnt2	1	129.704	7	26.7766	rs13479163	11.4234	0.49
1435471_at	MGC102251	13	67.1705	11	89.5675	rs13481150	12.1384	0.416
1435481_at	Zfp653	9	21.86	X	80.8499	rs13483868	11.6094	0.551
1435486_at	Pak3	X	140.232	7	26.7766	rs13479163	18.8544	0.03
1435489_at	Rnf130	11	49.9387	2	135.819	CEL-2_135876979	13.1788	0.194
1435491_at	D330038O06	8	72.2658	8	72.7366	rs13460430	50.1548	1e-06
1435492_at	Socs6	18	89.0347	10	101.805	rs13480734	9.81655	0.557
1435495_at	Adora1	1	136.096	7	15.6199	rs6295100	10.8883	0.58
1435519_at	Rap1b	10	117.252	12	80.8874	gnf12.078.433	14.8902	0.161
1435545_at	BC032203	17	46.9353	11	8.73673	rs3714397	10.7674	0.507
1435546_a_at	1810013L24Rik	16	8.85779	6	85.7832	rs13478871	10.8014	0.494
1435550_at	Mll2	15	98.6622	7	30.1445	rs8261944	12.2044	0.352
1435556_at	Gck	11	5.85231	7	26.7766	rs13479163	11.4532	0.461
1435558_at	Bai2	4	129.699	7	30.1445	rs8261944	16.6412	0.108
1435574_at	Chordc1	9	18.1214	11	8.73673	rs3714397	12.8039	0.315
1435579_at	AK138571	4	42.7243	4	41.2142	rs6232550	87.6509	4e-06
1435583_at	AU067633	5	9.47582	7	30.1445	rs8261944	14.4227	0.193
1435589_at	Ccdc85b	19	5.45663	1	21.6236	rs6253968	12.5297	0.341
1435590_at	D430047L21Rik	9	7.22029	7	26.7766	rs13479163	15.3785	0.182
1435604_at	Trim37	11	87.0336	7	26.7766	rs13479163	13.3169	0.245
1435612_at	Opcml	9	28.7327	11	8.73673	rs3714397	10.9614	0.327
1435620_at	Pfdn2	1	173.289	1	173.062	rs8258245	48.459	4e-06
1435632_at	Nufip2	11	77.5258	11	8.73673	rs3714397	21.324	0.00142857
1435641_at	Mgat4a	1	37.4963	18	73.9701	rs13483437	11.8607	0.525
1435645_at	Mmd	11	90.1121	7	111.466	rs13479460	12.5878	0.115
1435656_at	Gmps	3	63.8249	11	8.73673	rs3714397	11.8225	0.43
1435658_at	Slc27a1	8	74.1107	8	72.7366	rs13460430	43.4473	1.19e-05
1435675_at	Tbc1d12	19	38.9936	19	44.2447	rs13483639	9.1708	0.539
1435677_at	C85492	9	121.891	7	30.1445	rs8261944	21.3162	0.015
1435687_at	Sv2b	7	82.2613	7	81.4087	rs3656205	15.8627	0.063
1435695_a_at	A030007L17Rik	6	54.9357	16	70.0774	rs4199410	13.7114	0.266
1435698_at	Rictor	15	6.74983	7	26.7766	rs13479163	11.8671	0.373
1435712_a_at	Rps18	17	34.0892	7	30.1445	rs8261944	13.1253	0.303
1435722_at	Gria4	9	4.41792	7	26.7766	rs13479163	14.7977	0.156
1435739_at	AW208599	10	7.43531	11	8.73673	rs3714397	22.3377	0.02
1435746_at	Srpk2	5	23.0106	7	26.7766	rs13479163	14.5236	0.109
1435754_at	Zyg11b	4	107.902	11	8.73673	rs3714397	13.8197	0.079
1435757_a_at	Uqcrc2	7	127.803	11	22.9284	rs6283329	10.8426	0.339
1435758_at	B4galt6	18	20.8432	7	44.7592	rs6228386	12.908	0.312
1435762_at	Pacs1	19	5.13371	15	62.051	rs13482605	16.9188	0.044
1435768_at	Arid4b	13	14.2912	12	35.7064	gnf12.033.545	10.6146	0.424
1435780_at	Psd	19	46.3867	13	54.8887	rs13481817	12.7904	0.369
1435783_at	B230112C05Rik	13	97.8989	11	8.73673	rs3714397	13.6052	0.28
1435784_at	Apg9l1	1	75.1775	15	45.1075	rs13482547	13.5479	0.292
1435790_at	Olfm2	9	20.4722	7	24.6467	rs13479153	14.7026	0.174
1435803_a_at	Eif4e2	1	89.1245	12	102.821	rs13481617	10.7142	0.602
1435811_a_at	Unc50	1	37.4955	2	160.461	rs13476878	10.5205	0.571
1435818_at	Klhl15	X	91.5225	7	26.7766	rs13479163	16.8758	0.059
1435829_at	Zmat1	X	131.506	7	26.7766	rs13479163	21.0802	0.014
1435842_at	Nat8l	5	34.3482	18	40.07	rs13483314	12.7478	0.346
1435847_at	Cdc42bpa	1	182.095	2	160.461	rs13476878	17.5327	0.054
1435849_at	Dpysl4	7	146.269	7	26.7766	rs13479163	18.2857	0.03
1435864_a_at	1810063B05Rik	8	128.949	16	69.6854	rs4199265	12.8498	0.223
1435879_at	Akt3	1	178.952	11	8.73673	rs3714397	12.3296	0.386
1435884_at	Itsn1	16	91.8718	X	67.7016	rs3157124	15.3903	0.029
1435889_at	Mark2	19	7.34992	7	30.1445	rs8261944	13.7914	0.226
1435893_at	Vldlr	19	27.3281	7	26.7766	rs13479163	17.6368	0.056
1435902_at	Nudt18	14	70.9796	15	90.7567	rs3717268	10.9682	0.415
1435904_at	Eif2c3	4	126.011	11	8.73673	rs3714397	11.1598	0.573
1435928_at	Kiaa0513	8	122.689	19	3.41309	rs13483499	9.73412	0.62
1435964_a_at	Taok3	5	117.724	11	8.73673	rs3714397	11.9457	0.314
1435965_at	Cnot3	3	96.2585	7	18.8563	D7Mit57	15.8016	0.091
1435970_at	Nlk	11	78.3808	7	26.7766	rs13479163	15.1848	0.128
1436021_at	A930031D07Rik	1	133.935	1	128.996	rs6263067	45.2704	2e-06
1436025_at	Ccdc88a	11	29.41	7	26.7766	rs13479163	13.6973	0.201
1436027_at	Osbpl11	16	33.2428	11	8.73673	rs3714397	12.6581	0.27
1436028_at	Tmem33	5	67.682	7	26.7766	rs13479163	16.5024	0.085
1436034_at	Cep68	11	20.1267	9	123.812	rs8254393	16.1945	0.044
1436038_a_at	Dscr5	16	94.5863	15	102.993	rs13482752	11.5656	0.16
1436040_at	2310005L22Rik	4	131.865	2	170.518	rs13476914	11.3977	0.263
1436049_at	5730589K01Rik	14	52.9155	14	48.7116	rs6278789	39.9442	7.09e-05
1436056_at	C130021D12Rik	14	65.4279	8	60.5952	rs6399377	13.4501	0.326
1436066_at	Kalrn	16	34.1521	7	26.7766	rs13479163	15.4735	0.057
1436071_at	Ankrd26	6	118.451	6	95.039	rs13478906	13.5703	0.263
1436073_at	A630007B06Rik	19	56.862	6	95.039	rs13478906	13.8895	0.226
1436084_at	Scrt1	15	76.3467	15	96.0287	rs3688273	10.6521	0.533
1436087_at	Dpp10	1	125.23	7	30.1445	rs8261944	11.9585	0.337
1436133_at	Ccdc127	13	74.5026	1	154.947	rs13476184	10.5623	0.604
1436139_at	Mdga2	12	67.5671	11	8.73673	rs3714397	19.9916	0.019
1436159_at	Usp32	11	84.798	2	160.461	rs13476878	16.2483	0.114
1436161_at	Aprin	5	151.612	7	81.4087	rs3656205	14.2474	0.166
1436169_at	Paqr9	9	95.4667	6	92.586	rs6223362	12.1194	0.33
1436180_at	Dnajc5	2	181.287	6	95.039	rs13478906	15.8498	0.082
1436191_at	Arid4a	12	72.1991	10	27.6975	gnf10.025.923	10.2605	0.529
1436217_at	Zfp148	16	33.5034	7	26.7766	rs13479163	11.3864	0.472
1436239_at	Slc5a5	8	73.4068	8	72.7366	rs13460430	69.5077	1.87e-05
1436272_at	Rab3gap2	1	187.11	7	26.7766	rs13479163	14.9813	0.186
1436301_at	Ripk5	1	134.362	1	128.996	rs6263067	32.5953	0.00044
1436306_at	Saps1	7	4.5837	7	15.6199	rs6295100	13.9286	0.218
1436307_at	Myo9a	9	59.7744	2	160.461	rs13476878	15.2314	0.156
1436317_at	9030223K07Rik	1	54.5327	1	73.1444	rs13475920	11.1472	0.498
1436333_a_at	1110004E09Rik	16	90.9374	16	89.7741	rs4217061	17.1913	0.063
1436339_at	1810058I24Rik	6	35.203	14	118.847	rs6265743	12.8214	0.236
1436342_a_at	D19Ertd721e	19	8.94813	11	4.40873	rs3659787	13.9671	0.194
1436377_at	Gpr137	19	7.01269	7	30.1445	rs8261944	14.2432	0.229
1436380_at	Cdc42bpa	1	182.092	7	26.7766	rs13479163	13.4866	0.264
1436381_at	Dlgap3	4	126.914	7	15.6199	rs6295100	10.3422	0.567
1436387_at	Homer1	13	94.1299	7	112.726	D7Mit222	10.736	0.508
1436405_at	Dock4	12	41.573	X	54.1151	rs13483766	12.6801	0.244
1436408_at	Rprml	11	103.511	11	47.9608	rs13481014	19.8911	0.035
1436533_at	Trove2	1	145.602	4	49.7924	rs13477695	11.6655	0.384
1436534_at	Trove2	1	145.598	11	8.73673	rs3714397	14.1192	0.214
1436535_at	Ssa2	1	145.6	7	30.1445	rs8261944	20.1622	0.017
1436547_at	Dgke	11	88.901	11	83.5246	rs13481128	40.9339	0.000185185
1436552_at	6430702L21Rik	18	43.6912	10	27.6975	gnf10.025.923	9.55223	0.617
1436568_at	Jam2	16	84.8256	7	30.4293	rs8251849	14.416	0.186
1436570_at	Pag1	3	9.6876	11	42.2154	rs3693664	14.1534	0.193
1436572_at	Ccdc45	11	106.679	X	8.70931	rs13483712	9.62938	0.604
1436578_at	Ermin	2	57.8994	2	122.25	rs3686617	10.8261	0.562
1436581_at	D3Ertd789e	3	33.7124	11	8.73673	rs3714397	13.4399	0.237
1436632_at	1600027G01Rik	6	38.4622	11	4.40873	rs3659787	11.4982	0.451
1436645_a_at	Cnot4	6	34.9722	7	34.4076	rs6239372	14.9172	0.163
1436661_at	Dpp10	1	125.229	7	30.1445	rs8261944	12.7672	0.19
1436678_at	Sgcb	5	74.024	11	8.73673	rs3714397	14.9024	0.085
1436705_at	Tmem32	X	53.8388	7	35.0486	rs13479188	14.2227	0.135
1436706_at	Tmem32	X	53.84	11	8.73673	rs3714397	19.2224	0.027
1436737_a_at	Sorbs1	19	40.3693	11	8.73673	rs3714397	13.1327	0.145
1436743_at	Igsf4d	16	66.6606	X	54.1151	rs13483766	15.0661	0.145
1436746_at	Prkwnk1	6	119.92	16	78.0159	rs4207980	19.6565	0.009
1436754_at	AI839735	12	113.739	15	88.2986	rs13482695	11.7918	0.429
1436767_at	Luc7l2	6	38.5184	4	49.7924	rs13477695	11.8511	0.41
1436796_at	Matr3	18	35.7163	1	21.6236	rs6253968	11.2138	0.51
1436799_at	Enox1	14	78.121	11	8.73673	rs3714397	12.1231	0.311
1436809_a_at	Spin	13	51.2478	7	30.1445	rs8261944	15.4145	0.066
1436812_at	Fkrp	7	17.3948	16	73.6306	rs3656776	10.3434	0.43
1436839_at	2010109K11Rik	12	33.0673	9	123.812	rs8254393	10.8941	0.42
1436842_at	B230380D07Rik	9	70.4512	7	30.1445	rs8261944	15.3358	0.131
1436843_at	Rbm12b	4	12.0229	7	113.857	rs3657482	12.6705	0.269
1436844_at	AW046287	18	36.456	11	8.73673	rs3714397	14.73	0.101
1436853_a_at	Snca	6	60.6816	18	70.9106	gnf18.069.064	10.4773	0.584
1436875_at	Dnm3	1	163.92	12	77.2972	rs13481541	11.9437	0.398
1436877_at	AI316885	X	143.905	11	8.73673	rs3714397	11.6367	0.296
1436895_at	Centd1	5	63.0979	7	30.1445	rs8261944	9.39348	0.61
1436907_at	Nav1	1	137.335	1	126.447	rs6189020	39.5014	2.09e-05
1436919_at	Tp53i11	2	93.0413	13	54.8887	rs13481817	13.185	0.218
1436943_at	Cyb5d2	11	72.5911	11	69.4181	rs13481087	28.1656	0.000263158
1436976_a_at	Yod1	1	132.618	11	8.73673	rs3714397	16.3618	0.035
1436983_at	Crebbp	16	4.09349	16	78.0159	rs4207980	13.508	0.218
1436984_at	Abi2	1	60.5358	4	49.7924	rs13477695	17.4053	0.039
1437001_at	Gsk3b	16	38.2435	16	76.5402	rs4206648	12.2955	0.311
1437002_at	C030011O14Rik	3	151.939	7	26.7766	rs13479163	15.414	0.121
1437061_at	Mbd1	18	74.4404	7	26.7766	rs13479163	10.3609	0.579
1437067_at	Phtf2	5	20.2648	11	8.73673	rs3714397	11.5982	0.311
1437071_at	Eif1ax	X	155.827	11	42.2154	rs3693664	14.8537	0.143
1437087_at	Lrrc8b	5	105.919	7	26.7766	rs13479163	21.9429	0.014
1437105_at	Rbp2	6	120.391	11	8.73673	rs3714397	12.0879	0.227
1437107_at	Rab6b	9	103.065	16	10.5091	rs4161101	12.961	0.296
1437118_at	Usp7	16	8.70507	10	122.416	rs13480802	11.2993	0.453
1437142_a_at	Pigo	4	43.0305	4	41.2142	rs6232550	36.6351	9.01e-05
1437147_at	Gabrg2	11	41.724	11	42.2154	rs3693664	16.5446	0.059
1437154_at	Cep170	1	178.664	12	35.7064	gnf12.033.545	9.8945	0.555
1437156_at	Efcbp1	4	14.8795	11	22.9284	rs6283329	14.4731	0.191
1437160_at	Nlgn1	3	25.3322	7	26.7766	rs13479163	11.434	0.487
1437162_at	Gpiap1	2	103.634	11	8.73673	rs3714397	13.1632	0.134
1437167_at	Tmod2	9	75.4186	12	80.8874	gnf12.078.433	14.9887	0.159
1437168_at	Srrp	4	33.3198	11	8.73673	rs3714397	11.2051	0.303
1437177_at	Larp4	15	99.8433	7	30.1445	rs8261944	13.7536	0.24
1437179_at	Rif1	2	51.9591	7	30.1445	rs8261944	11.5229	0.508
1437181_at	Peli2	14	48.8798	7	112.527	rs3674465	10.6604	0.592
1437183_at	Lrrc4b	7	51.7174	7	18.8563	D7Mit57	20.3139	0.024
1437188_at	Gabbr1	17	37.1859	15	28.9905	rs3702361	12.4811	0.388
1437200_at	Fcho2	13	99.4938	1	73.1444	rs13475920	10.6952	0.579
1437212_at	Zfp70	7	30.6617	7	26.7766	rs13479163	20.3699	0.013
1437216_at	Ccdc88a	11	29.4088	11	24.5727	rs3677232	35.4691	0.000322581
1437224_at	Rtn4	11	29.6067	7	26.7766	rs13479163	17.0296	0.025
1437278_a_at	Sae2	7	34.9257	9	123.812	rs8254393	10.5072	0.599
1437285_at	1110020G09Rik	15	9.03993	11	8.73673	rs3714397	13.0129	0.212
1437288_at	Impad1	4	4.69152	7	26.7766	rs13479163	18.2231	0.013
1437289_at	Impad1	4	4.69062	7	26.7766	rs13479163	11.0509	0.516
1437296_at	Pkn2	3	142.457	7	26.7766	rs13479163	15.0734	0.175
1437301_a_at	Dvl1	4	155.233	11	22.9284	rs6283329	12.561	0.419
1437307_at	Senp8	9	59.5836	11	11.0711	rs3023249	14.4176	0.149
1437318_at	Pak3	X	140.228	11	58.0605	rs13481045	14.32	0.196
1437348_at	Fbxo28	1	184.246	3	77.9986	rs3672300	12.7203	0.256
1437349_at	Ckap5	2	91.4565	7	81.4087	rs3656205	11.98	0.326
1437354_at	Ube3a	7	66.5645	7	26.7766	rs13479163	18.7951	0.038
1437359_at	Rnps1	17	24.553	17	23.9217	rs3023864	38.8465	0.000769231
1437395_at	Zcchc11	4	108.231	7	26.7766	rs13479163	12.5317	0.26
1437421_at	A030002D08Rik	X	19.6789	7	26.7766	rs13479163	13.1405	0.252
1437426_at	Wac	18	7.9014	1	73.1444	rs13475920	11.6915	0.46
1437455_a_at	Btg1	10	96.082	9	123.812	rs8254393	10.2058	0.342
1437457_a_at	Mtpn	6	35.46	7	30.1445	rs8261944	12.2679	0.367
1437475_at	Xrn1	9	95.9577	12	5.97048	rs13481282	10.6842	0.628
1437476_at	Rrm2b	15	37.8547	11	8.73673	rs3714397	16.4879	0.04
1437513_a_at	Serinc1	10	57.2451	7	30.1445	rs8261944	12.6394	0.311
1437525_a_at	BC053071	14	25.2679	7	30.4293	rs8251849	11.8595	0.395
1437533_at	Birc4	X	39.4621	7	26.7766	rs13479163	17.1526	0.065
1437548_at	Bicd1	6	149.506	X	35.1443	gnfX.023.543	12.4981	0.21
1437565_a_at	Gnl2	4	124.731	12	35.7064	gnf12.033.545	9.41666	0.548
1437633_at	Ankrd11	8	125.42	11	58.0605	rs13481045	11.7328	0.451
1437634_at	6330441O12Rik	X	39.1486	7	30.1445	rs8261944	15.7626	0.133
1437679_a_at	Glrx2	1	145.589	16	70.0774	rs4199410	14.9883	0.107
1437704_at	2900024O10Rik	13	81.8891	16	91.559	rs4219239	13.675	0.28
1437735_at	Ppp1r12a	10	107.716	12	35.7064	gnf12.033.545	11.2791	0.294
1437744_at	Slitrk4	X	61.5231	7	26.7766	rs13479163	21.9972	0.0025
1437753_at	6230409E13Rik	4	21.925	11	8.73673	rs3714397	20.4726	0.01
1437765_at	Cpeb3	19	37.0964	7	26.7766	rs13479163	20.2748	0.00333333
1437862_at	Rbm25	12	85.0042	5	13.8294	mCV23582150	12.8555	0.321
1437873_at	Hszfp36	17	32.9542	11	8.73673	rs3714397	13.2541	0.163
1437877_at	D3Ertd789e	3	33.7111	1	73.1444	rs13475920	13.6864	0.282
1437891_at	Frs2	10	116.508	1	173.062	rs8258245	10.406	0.538
1437901_a_at	Vps41	13	18.9211	7	30.1445	rs8261944	17.5323	0.064
1437907_a_at	Tbca	13	95.6127	2	5.76364	rs13476330	11.6274	0.46
1437911_at	6330416L07Rik	17	22.4751	17	12.1586	rs3662820	24.4771	0.005
1437923_at	Csnk1a1	18	61.7458	7	26.7766	rs13479163	12.1929	0.303
1437956_at	BB220380	11	68.3657	14	18.7051	gnf14.013.298	7.64737	0.338
1437958_at	Xpr1	1	157.13	4	49.7924	rs13477695	12.2687	0.424
1437968_at	Grin1	2	25.1467	7	30.1445	rs8261944	18.5596	0.057
1437974_a_at	Hk1	10	61.7319	7	15.6199	rs6295100	12.1481	0.297
1437987_at	Arhgap5	12	53.6728	11	24.5727	rs3677232	12.8792	0.262
1438017_at	Rusc1	3	88.8883	15	28.9905	rs3702361	11.4284	0.388
1438018_at	Hook1	4	95.6915	7	26.7766	rs13479163	11.9954	0.433
1438022_at	Rab11fip3	17	26.1264	10	84.3434	rs13480679	15.2105	0.107
1438037_at	Herc5	6	57.6122	7	30.1445	rs8261944	16.3127	0.08
1438039_at	Hectd1	12	52.8997	16	76.5402	rs4206648	14.9272	0.11
1438045_at	Eea1	10	95.5072	1	66.1981	gnf01.063.789	12.0467	0.497
1438057_at	Gria2	3	80.4857	11	8.73673	rs3714397	13.6683	0.185
1438062_at	AK029311	7	104.839	7	95.8591	rs13479416	41.0679	1.13e-05
1438070_at	Phf3	1	30.8627	16	17.5769	rs4165069	11.5378	0.499
1438130_at	Taf15	11	83.3126	11	82.0737	rs13481123	64.1477	5e-06
1438169_a_at	Frmd4b	6	97.2369	7	30.4293	rs8251849	14.7402	0.179
1438193_at	Nrxn3	12	91.5707	4	31.8934	rs6177140	11.0418	0.585
1438249_at	Usp7	16	8.69621	1	43.6869	rs13459182	13.0044	0.25
1438258_at	Vldlr	19	27.326	7	30.1445	rs8261944	15.4471	0.125
1438259_at	Strn3	12	52.7295	11	8.73673	rs3714397	12.6569	0.286
1438265_at	4930413O22Rik	1	10.0601	4	49.7924	rs13477695	14.1865	0.161
1438268_at	Rc3h2	2	37.2308	16	76.5402	rs4206648	10.8908	0.527
1438289_a_at	Sumo1	1	59.6963	2	5.76364	rs13476330	12.5071	0.331
1438301_at	Ddef1	15	64.0215	4	49.7924	rs13477695	12.214	0.431
1438305_at	Rims1	1	22.2775	7	26.7766	rs13479163	14.6516	0.159
1438306_at	3110001E11Rik	13	105.921	11	24.5727	rs3677232	10.275	0.521
1438310_at	Dgkh	14	78.9593	11	8.73673	rs3714397	12.1107	0.268
1438344_at	Pap2d	3	117.39	3	89.6293	CEL-3_89968332	11.2189	0.562
1438361_at	2310035C23Rik	1	107.616	12	82.5076	rs6170344	10.959	0.63
1438368_a_at	Matr3	18	35.7509	11	8.73673	rs3714397	10.7977	0.616
1438396_at	9530014D17Rik	X	45.3183	7	26.7766	rs13479163	13.1155	0.267
1438397_a_at	Rnpc2	2	155.999	7	30.1445	rs8261944	11.9552	0.437
1438398_at	Rnpc2	2	155.998	1	73.1444	rs13475920	12.7034	0.314
1438401_at	Ubn1	16	5.05518	16	78.0159	rs4207980	10.8164	0.299
1438413_at	Senp7	16	56.1895	11	8.73673	rs3714397	12.1094	0.167
1438426_at	Tmem58	1	137.268	1	128.996	rs6263067	102.866	8e-06
1438432_at	Lnpep	17	17.6605	17	3.75103	rs13482842	13.5877	0.26
1438452_at	Nebl	2	17.2657	7	30.1445	rs8261944	14.8118	0.175
1438454_at	Pten	19	32.8808	7	26.7766	rs13479163	15.5657	0.148
1438496_a_at	Ddx26b	X	53.7482	5	20.7593	rs6256752	12.0562	0.299
1438519_at	4930429H24Rik	16	20.0992	16	78.0159	rs4207980	11.4077	0.498
1438520_at	C330005L02Rik	9	96.9754	7	26.7766	rs13479163	14.3946	0.139
1438565_at	A830010M20Rik	5	107.936	7	30.1445	rs8261944	10.8717	0.625
1438580_at	Zcchc7	4	44.9244	11	8.73673	rs3714397	19.1642	0.025
1438592_at	Zfp111	8	63.5322	7	26.7766	rs13479163	12.0228	0.31
1438613_at	Kcna4	2	107.138	7	30.1445	rs8261944	12.9172	0.252
1438663_at	Bat2d1	1	164.602	1	154.947	rs13476184	67.0965	5e-06
1438664_at	Prkar2b	12	32.6438	6	90.3235	rs3661039	12.9161	0.308
1438686_at	Eif4g1	16	20.6796	16	10.5091	rs4161101	12.5266	0.069
1438688_at	Srrm2	17	23.9439	16	78.0159	rs4207980	14.3098	0.085
1438702_at	Flrt2	12	97.0213	7	30.1445	rs8261944	11.3808	0.521
1438723_a_at	Rps10	17	27.7711	7	30.1445	rs8261944	14.5642	0.207
1438725_at	Thrap1	11	86.084	11	8.73673	rs3714397	10.6976	0.596
1438736_at	Thoc2	X	39.1756	7	30.1445	rs8261944	15.7932	0.081
1438739_at	Cnbp1	6	87.7979	4	49.7924	rs13477695	12.1525	0.417
1438754_at	AK033525	14	51.4982	14	48.7116	rs6278789	83.8519	8e-06
1438781_at	2310005C01Rik	3	133.142	7	26.7766	rs13479163	13.5473	0.272
1438786_a_at	2610021A01Rik	7	48.8837	7	40.3789	rs6206014	37.0294	0
1438788_at	Ankrd17	5	90.7438	7	26.7766	rs13479163	12.9931	0.33
1438821_at	Rfwd2	1	161.203	1	73.1444	rs13475920	12.425	0.338
1438838_at	Ftx	X	100.765	11	8.73673	rs3714397	12.9762	0.29
1438888_at	Gcl	6	86.671	X	35.1443	gnfX.023.543	10.2996	0.62
1439010_at	Larp4	15	99.8464	1	73.1444	rs13475920	10.5455	0.598
1439012_a_at	Dck	5	89.2121	6	77.4513	rs3663024	13.4183	0.178
1439024_at	Bag4	8	26.8754	2	160.461	rs13476878	12.6409	0.344
1439032_at	2410007P03Rik	2	120.447	2	118.572	UT_2_119.151187	31.3699	0.000909091
1439033_at	4930572I07Rik	4	44.9233	7	30.1445	rs8261944	14.393	0.154
1439041_at	Slc39a10	1	53.4503	2	160.461	rs13476878	12.6678	0.322
1439044_at	Zfp354c	11	50.6249	11	42.2154	rs3693664	16.3196	0.086
1439089_at	Zbtb41	1	141.347	11	8.73673	rs3714397	15.6759	0.104
1439105_at	Cdadc1	14	60.1869	12	35.7064	gnf12.033.545	10.8413	0.442
1439108_at	Mll5	5	23.0018	7	26.7766	rs13479163	19.7508	0.00325
1439127_at	AI314180	4	58.8468	12	80.8874	gnf12.078.433	10.7579	0.586
1439148_a_at	Pfkl	10	77.4509	7	30.1445	rs8261944	12.0289	0.397
1439173_at	Hook1	4	95.6817	11	58.0605	rs13481045	13.1647	0.265
1439204_at	Scn3a	2	65.2964	1	73.1444	rs13475920	11.083	0.517
1439249_at	Wac	18	7.92868	11	22.9284	rs6283329	12.1977	0.4
1439304_at	Pam	1	99.9424	4	49.7924	rs13477695	18.7808	0.03
1439341_at	KIAA4095	18	10.5625	11	19.6458	D11Mit79	14.2416	0.193
1439368_a_at	Slc9a3r2	17	24.7768	7	30.1445	rs8261944	12.3429	0.34
1439411_a_at	Xpo7	14	71.0644	11	11.0711	rs3023249	12.0352	0.453
1439438_a_at	Cip29	10	128.315	X	111.641	CEL-X_106858553	12.8099	0.201
1439460_a_at	Zfp289	2	91.117	7	30.4293	rs8251849	12.3734	0.207
1439481_at	Ipo9	1	137.279	7	81.4087	rs3656205	11.0478	0.593
1439554_at	Scmh1	4	120.121	4	49.7924	rs13477695	11.2382	0.535
1439558_at	Zfp75	9	19.4539	12	35.7064	gnf12.033.545	10.6807	0.56
1439572_at	R3hdm	1	130.003	7	26.7766	rs13479163	13.3402	0.176
1439607_at	Slc7a14	3	31.102	9	123.812	rs8254393	11.1841	0.446
1439611_at	Chrm1	19	8.75437	15	45.1075	rs13482547	12.7965	0.316
1439616_at	AV026040	9	67.8451	4	31.8934	rs6177140	12.3231	0.439
1439647_at	4933409K07Rik	4	41.842	4	41.2142	rs6232550	27.0592	0.001375
1439652_at	Selenbp2	11	117.525	10	104.985	rs6283474	12.3008	0.367
1439678_at	Gls	1	52.2835	11	8.73673	rs3714397	10.8828	0.579
1439725_at	Ptprt	2	161.348	11	47.9608	rs13481014	20.7897	0.011
1439791_at	8030462N17Rik	12	66.0245	X	111.641	CEL-X_106858553	9.94647	0.535
1439805_at	Nfat5	8	109.853	7	30.1445	rs8261944	10.9717	0.536
1439824_at	Chm	X	110.154	13	12.117	rs13459139	12.3112	0.446
1439832_at	Wasl	6	24.5719	7	30.1445	rs8261944	11.5983	0.363
1439833_at	2011-09-03	15	82.1248	7	15.6199	rs6295100	14.5564	0.192
1439845_at	Hp1bp3	4	137.8	4	135.947	rs13478002	53.3684	7e-06
1439872_at	Kcna2	3	106.911	11	58.0605	rs13481045	10.7013	0.584
1439899_at	Galnt13	2	54.9702	7	26.7766	rs13479163	12.7529	0.379
1439906_at	MGC28917	12	39.5965	16	89.7741	rs4217061	11.9714	0.419
1439928_at	A930012M21Rik	11	30.1246	11	24.5727	rs3677232	33.1664	0.000196078
1439943_at	Vps54	11	21.1781	9	123.812	rs8254393	14.5351	0.102
1439946_at	Mef2c	13	83.7604	5	13.8294	mCV23582150	11.5976	0.468
1440013_at	Trim44	2	102.167	4	49.7924	rs13477695	17.4531	0.044
1440027_at	Mon2	10	122.429	7	26.7766	rs13479163	10.5161	0.584
1440037_at	Pbx1	1	170.355	7	30.1445	rs8261944	11.4501	0.418
1440103_at	LOC329178	8	71.7053	8	71.8112	rs8253516	27.1463	0.00142857
1440104_at	Ranbp2	10	57.9233	X	35.1443	gnfX.023.543	12.4733	0.379
1440163_at	6030490B17Rik	12	109.414	12	108.001	rs13481636	47.5037	4e-06
1440187_at	Taf3	2	9.83624	11	8.73673	rs3714397	9.79174	0.622
1440193_at	Ankrd12	17	66.3364	7	30.1445	rs8261944	14.0952	0.208
1440195_at	Serbp1	6	67.2389	7	115.203	mCV24779699	16.581	0.064
1440197_at	BC032203	17	46.9379	9	105.498	rs6205631	11.7124	0.497
1440279_at	Txndc10	18	90.7121	6	77.4513	rs3663024	10.8327	0.588
1440291_at	Cog4	2	146.046	15	45.1075	rs13482547	11.6048	0.514
1440318_at	Wdr35	12	8.99288	10	122.416	rs13480802	9.92414	0.62
1440407_at	BE956823	5	108.796	7	30.1445	rs8261944	17.5396	0.076
1440429_at	Arpp21	9	112.064	7	111.466	rs13479460	10.8758	0.548
1440455_at	Camk2n	4	138.016	4	135.947	rs13478002	128.304	6e-06
1440461_at	Fam63b	15	63.7785	4	49.7924	rs13477695	14.56	0.082
1440516_at	Slitrk4	X	61.5182	7	26.7766	rs13479163	11.3155	0.436
1440522_at	ENSMUSG00000073019	X	100.591	7	26.7766	rs13479163	11.655	0.251
1440545_at	Grm1	10	10.4059	6	85.7832	rs13478871	15.3803	0.119
1440620_at	Rab8a	8	74.7072	8	72.7366	rs13460430	35.2568	6.33e-05
1440728_at	Kcnma1	14	24.2506	4	49.7924	rs13477695	10.7075	0.484
1440759_at	Kcna2	3	106.918	11	8.73673	rs3714397	12.7418	0.339
1440807_at	Magi2	5	19.7358	4	49.7924	rs13477695	15.0028	0.193
1440851_at	4933407N01Rik	11	30.8298	7	24.6467	rs13479153	13.9939	0.113
1440856_at	Mapk8	14	34.1912	6	77.4513	rs3663024	18.4541	0.047
1440859_at	Akap6	12	54.2514	2	160.461	rs13476878	11.6105	0.467
1440891_at	Gria4	9	4.47836	7	26.7766	rs13479163	11.9033	0.327
1440918_at	Rasgrf2	13	92.0226	2	160.461	rs13476878	15.4511	0.089
1440934_at	6230409E13Rik	4	21.9282	18	73.9701	rs13483437	13.0471	0.32
1440936_at	D17Ertd141e	17	6.04069	11	19.6458	D11Mit79	14.6786	0.205
1440940_at	Cacnb1	11	97.8629	7	30.1445	rs8261944	13.0647	0.356
1440946_at	A930008M05Rik	4	58.9737	4	49.7924	rs13477695	15.838	0.058
1440955_at	Crim2	6	29.4321	7	30.1445	rs8261944	11.7007	0.404
1440966_at	2011-03-07	2	60.0858	7	30.1445	rs8261944	22.538	0.0024
1440970_at	Umps	16	33.9692	5	133.347	rs13478539	12.3442	0.441
1440981_at	Pak7	2	135.908	12	108.001	rs13481636	18.7079	0.038
1440992_at	3110052M02Rik	17	21.7998	17	12.1586	rs3662820	32.6214	0.000909091
1440994_at	1700066D14Rik	10	10.9368	16	69.1723	rs4199044	11.8143	0.478
1441101_at	Hecw1	13	14.3215	7	26.7766	rs13479163	16.0775	0.134
1441108_at	D230014K01Rik	12	107.028	4	31.8934	rs6177140	12.8697	0.301
1441212_at	6720467C03Rik	4	12.0925	11	8.73673	rs3714397	13.0147	0.076
1441266_at	Strn3	12	52.7412	7	26.7766	rs13479163	14.758	0.186
1441305_at	Nedd4l	18	65.3772	X	128.95	rs13484003	9.63217	0.622
1441312_at	Cnnm1	19	43.5706	15	56.9906	rs3702158	14.3467	0.176
1441327_a_at	Ssr1	13	38.0634	14	118.847	rs6265743	11.3906	0.415
1441328_at	Picalm	7	97.3517	11	8.73673	rs3714397	14.0404	0.229
1441376_at	Gabarapl2	8	114.479	7	111.466	rs13479460	10.6264	0.21
1441481_at	Mfap3l	8	63.1512	8	60.5952	rs6399377	16.3941	0.118
1441502_at	Lrfn5	12	62.6306	4	49.7924	rs13477695	13.5407	0.292
1441567_at	D130076G13Rik	9	59.7293	4	49.7924	rs13477695	16.7131	0.073
1441615_at	Cbfa2t2h	2	154.345	2	149.357	rs6206791	32.3087	0.000166667
1441815_at	AI851453	18	86.6746	7	26.7766	rs13479163	19.8314	0.031
1441973_at	Zfp295	16	98.1694	11	8.73673	rs3714397	16.0713	0.116
1441988_at	Ppm1k	6	57.4588	5	20.7593	rs6256752	12.446	0.289
1441992_at	Rab14	2	35.0516	7	30.1445	rs8261944	12.8705	0.289
1442003_at	Diap2	X	127	7	26.7766	rs13479163	18.3502	0.015
1442016_at	D630004N19Rik	7	107.694	7	95.8591	rs13479416	44.7345	1.42e-05
1442025_a_at	Zbtb16	9	48.4599	16	69.1723	rs4199044	14.9967	0.184
1442027_at	Nbeal1	1	60.3881	4	49.7924	rs13477695	19.7146	0.028
1442066_at	C530028O21Rik	6	124.95	7	30.1445	rs8261944	13.1574	0.357
1442095_at	Asxl3	18	22.6846	7	30.1445	rs8261944	13.1029	0.299
1442109_at	Fubp1	3	151.894	4	49.7924	rs13477695	11.3978	0.453
1442248_at	LOC214424	15	27.8437	7	26.7766	rs13479163	19.0023	0.013
1442276_at	Lphn3	5	81.6618	4	49.7924	rs13477695	13.1853	0.253
1442325_at	C530046L02Rik	17	24.3128	17	23.9217	rs3023864	22.9903	0.005
1442326_at	Pcdh15	10	73.8592	9	121.765	rs13459114	5.9867	0.497
1442416_at	4930547M16Rik	12	45.4182	11	47.9608	rs13481014	13.1229	0.251
1442466_a_at	B430315C20Rik	2	121.173	2	118.572	UT_2_119.151187	30.5554	0.00047619
1442542_at	Eya4	10	22.8229	3	54.3657	gnf03.051.000	10.815	0.617
1442707_at	Camk2a	18	61.145	15	28.443	rs13482498	12.9128	0.286
1442752_at	Opcml	9	28.2521	7	81.4087	rs3656205	16.6278	0.079
1442787_at	Abi2	1	60.5385	7	26.7766	rs13479163	14.5311	0.08
1442813_at	A230051N06Rik	6	37.0087	16	76.5402	rs4206648	11.9511	0.403
1442867_at	Clasp1	9	64.5599	7	30.1445	rs8261944	14.7638	0.114
1442889_at	4930502N02Rik	13	19.2453	7	26.7766	rs13479163	15.4808	0.071
1442950_at	Nrg3	14	40.0293	7	30.1445	rs8261944	11.217	0.493
1442982_at	Ccdc66	14	28.2957	7	24.6467	rs13479153	23.5098	0.00333333
1443026_at	B130020M22Rik	10	118.91	10	101.805	rs13480734	11.3971	0.51
1443108_at	Padi2	6	28.1611	7	111.466	rs13479460	10.5811	0.559
1443109_at	5830417C01Rik	1	180.151	7	111.466	rs13479460	13.9716	0.204
1443127_at	Grid2	6	63.5899	7	30.1445	rs8261944	17.5405	0.063
1443160_at	B430219L04Rik	7	117.591	4	49.7924	rs13477695	11.1186	0.594
1443170_at	Cnnm1	19	43.5711	7	30.1445	rs8261944	15.1362	0.18
1443262_at	Mrps14	1	162.131	1	154.947	rs13476184	63.0582	1.92e-05
1443314_at	2410042D21Rik	2	112.247	7	30.1445	rs8261944	18.3335	0.044
1443338_at	4933416E05Rik	2	48.981	7	30.1445	rs8261944	17.8686	0.052
1443344_at	4932409I22Rik	10	79.0735	13	54.8887	rs13481817	11.2727	0.434
1443486_at	5630400E24Rik	7	129.066	10	27.6975	gnf10.025.923	9.85323	0.62
1443489_at	Zfp9	15	35.4153	X	54.1151	rs13483766	10.5745	0.507
1443528_at	Ttbk1	17	46.5794	7	24.6467	rs13479153	17.579	0.02
1443586_at	Fip1l1	5	74.9362	7	24.6467	rs13479153	14.4953	0.185
1443612_at	Tsc1	2	110.497	11	8.73673	rs3714397	17.7301	0.059
1443705_at	Erc2	14	28.8425	4	49.7924	rs13477695	11.644	0.526
1443728_at	9030605E16Rik	14	94.0349	7	26.7766	rs13479163	20.8953	0.0015
1443869_at	Pde12	14	27.4837	11	4.40873	rs3659787	12.8001	0.275
1443909_at	Cstf3	2	104.451	7	30.1445	rs8261944	11.0455	0.537
1443924_at	Prkwnk3	X	147.754	7	26.7766	rs13479163	14.1462	0.215
1443986_at	Hrpt2	1	145.452	11	8.73673	rs3714397	17.344	0.024
1444004_at	Thoc2	X	39.1804	7	30.1445	rs8261944	14.849	0.072
1444057_at	Ubxd2	1	130.147	1	128.996	rs6263067	75.4921	0
1444058_at	2310047C04Rik	16	48.9539	7	30.1445	rs8261944	13.0611	0.298
1444077_at	D130017N08Rik	16	37.1074	7	26.7766	rs13479163	20.3642	0.016
1444141_at	Snx13	12	35.7914	7	30.1445	rs8261944	10.8271	0.623
1444151_at	Elavl3	9	21.8527	16	76.5402	rs4206648	12.1819	0.367
1444157_a_at	Jarid1c	X	148.709	7	26.7766	rs13479163	12.3801	0.388
1444199_at	Mfsd4	1	133.92	1	128.996	rs6263067	32.9985	0.0003125
1444241_at	Wac	18	7.92803	7	30.1445	rs8261944	18.1719	0.05
1444260_at	C230014O12	8	71.8405	8	71.8112	rs8253516	60.8121	2e-06
1444333_at	Strn3	12	52.7313	11	8.73673	rs3714397	11.8327	0.413
1444343_at	Rap1gds1	3	138.641	11	8.73673	rs3714397	11.3203	0.499
1444387_at	Nmt2	2	3.22405	4	49.7924	rs13477695	13.8756	0.228
1444437_at	Usp34	11	23.3561	1	73.1444	rs13475920	14.1486	0.193
1444444_at	Foxl2	12	54.2553	7	30.1445	rs8261944	28.0825	0.0022
1444478_at	Appl1	14	27.736	7	30.1445	rs8261944	13.8423	0.238
1444498_at	A430107P09Rik	12	79.3243	4	49.7924	rs13477695	10.8116	0.365
1444557_at	Sumo1	1	59.6986	7	30.1445	rs8261944	11.3023	0.523
1444662_at	Pla2g4c	7	13.9231	16	79.1356	rs4209059	10.5205	0.537
1444669_at	Lrfn1	7	29.2527	7	30.1445	rs8261944	16.6225	0.056
1444746_at	Ptbp2	3	119.434	7	30.1445	rs8261944	10.4243	0.574
1444778_at	2011-09-03	15	82.1202	11	8.73673	rs3714397	15.1982	0.08
1444923_at	Kcnh5	12	75.9901	7	26.7766	rs13479163	17.2518	0.076
1445034_at	LOC224893	4	46.61	8	60.5952	rs6399377	10.1065	0.544
1445160_at	Nav3	10	109.137	7	26.7766	rs13479163	12.7457	0.257
1445297_at	Nap1l3	16	37.1101	7	81.4087	rs3656205	12.5251	0.362
1445330_at	Grp58	2	121.264	2	118.572	UT_2_119.151187	61.0041	8e-06
1445340_at	Phr1	14	103.641	7	30.1445	rs8261944	14.7382	0.141
1445359_at	Adcy1	11	7.07379	7	81.4087	rs3656205	15.5043	0.136
1445465_at	N28178	4	42.9572	4	41.2142	rs6232550	35.8565	4e-06
1445473_at	Diras2	13	52.6026	16	10.5091	rs4161101	14.3496	0.196
1445534_at	Flnb	14	8.77069	7	26.7766	rs13479163	13.8258	0.198
1445631_at	Tmem16c	2	110.498	12	82.5076	rs6170344	13.1826	0.128
1445691_at	Chn1	2	73.4499	7	26.7766	rs13479163	13.7416	0.261
1445723_at	Plcl1	1	55.8092	11	8.73673	rs3714397	13.7454	0.12
1445862_at	BC031575	16	14.1412	7	30.1445	rs8261944	11.9577	0.466
1445880_at	Dcc	18	72.3799	7	30.1445	rs8261944	15.6539	0.037
1446048_at	Cdh11	8	105.237	7	81.4087	rs3656205	17.9714	0.053
1446190_at	Dcamkl1	3	55.2808	7	81.4087	rs3656205	12.7111	0.302
1446234_at	Utx	X	17.8056	4	49.7924	rs13477695	10.3255	0.586
1446537_at	Kcnq5	1	21.8352	1	43.6869	rs13459182	11.7326	0.371
1446670_at	Cugbp2	2	6.63286	7	30.1445	rs8261944	10.432	0.621
1447156_at	Chm	X	110.223	7	26.7766	rs13479163	18.9759	0.028
1447207_at	2810482G21Rik	4	107.938	12	80.8874	gnf12.078.433	12.0776	0.447
1447219_at	Psmc4	7	28.8258	12	16.8539	rs6180964	11.078	0.405
1447228_at	Zfp289	2	91.1171	7	30.4293	rs8251849	14.6054	0.15
1447374_at	Ube2h	6	30.2265	4	31.8934	rs6177140	11.3473	0.526
1447385_at	Grin2a	16	9.56962	11	8.73673	rs3714397	11.6401	0.506
1447706_at	Ppp1r2	16	31.2661	12	35.7064	gnf12.033.545	10.5115	0.538
1447922_at	Stxbp5l	16	37.1132	7	30.1445	rs8261944	14.5188	0.107
1447937_a_at	4933409K07Rik	4	41.757	4	41.2142	rs6232550	28.1564	0.001375
1447938_at	4933409K07Rik	4	42.482	4	41.2142	rs6232550	36.6404	0.000357143
1447939_a_at	4933409K07Rik	4	41.9599	4	41.2142	rs6232550	36.058	0.0004
1448057_at	Plekha6	1	135.169	6	95.039	rs13478906	10.9064	0.624
1448083_at	Nalcn	14	123.676	7	26.7766	rs13479163	12.7797	0.3
1448106_at	Necap1	6	122.838	6	90.3235	rs3661039	17.043	0.091
1448108_at	Tde2	10	57.2358	7	112.527	rs3674465	11.4355	0.447
1448113_at	Stmn1	4	134.029	4	142.449	rs3023025	12.4226	0.259
1448135_at	Atf4	15	80.0874	1	173.062	rs8258245	42.5983	4.46e-05
1448155_at	Pdcd6ip	9	113.562	7	30.1445	rs8261944	10.3233	0.577
1448174_at	Cul1	6	47.4756	7	30.1445	rs8261944	17.9549	0.035
1448188_at	Ucp2	7	107.647	7	95.8591	rs13479416	31.3475	0.000196078
1448207_at	Lasp1	11	97.6862	16	10.5091	rs4161101	13.7732	0.252
1448210_at	Rab1	11	20.1263	11	8.73673	rs3714397	16.8003	0.023
1448212_at	Tnfsf5ip1	18	67.8084	12	103.433	rs13481620	11.904	0.296
1448219_a_at	Ywhaz	15	36.7017	3	3.77107	rs13476950	11.1906	0.497
1448224_at	Tfam	10	70.6909	10	19.774	rs3688363	15.3029	0.125
1448238_at	Cle7	14	20.6313	1	172.887	rs8242852	25.12	0.0022
1448269_a_at	Klhl13	X	22.7965	7	30.4293	rs8251849	19.0863	0.023
1448274_at	C1qbp	11	70.7915	11	47.9608	rs13481014	16.828	0.071
1448289_at	Crmp1	5	37.6828	15	45.1075	rs13482547	19.1836	0.048
1448300_at	Mgst3	1	169.303	1	165.222	rs4222763	52.3287	9e-06
1448307_at	Dscr2	16	96.2037	16	70.0774	rs4199410	12.1226	0.423
1448309_at	Ap3m1	14	21.8559	7	34.4076	rs6239372	12.4684	0.382
1448333_at	Adprh	16	38.4456	16	38.2971	rs4151928	23.637	0.005
1448334_a_at	Ccni	5	93.611	11	22.9284	rs6283329	11.7696	0.421
1448339_at	D9Wsu20e	9	79.6187	7	30.1445	rs8261944	11.3746	0.39
1448340_at	Tmem30a	9	79.6162	7	30.1445	rs8261944	16.5032	0.084
1448346_at	Cfl1	19	5.49344	7	24.6467	rs13479153	18.9062	0.023
1448361_at	Ttc3	16	94.6903	18	73.9701	rs13483437	12.8644	0.26
1448362_at	Dnajc7	11	100.444	6	85.7832	rs13478871	13.9407	0.171
1448373_at	Mrpl18	17	13.1067	7	67.9902	rs3698065	11.4776	0.328
1448391_at	Rab9	X	162.895	X	128.95	rs13484003	10.9089	0.474
1448403_at	Lars	18	42.3621	11	42.6618	rs6307831	12.6686	0.313
1448434_at	Rnf103	6	71.4603	10	27.6975	gnf10.025.923	12.59	0.223
1448479_at	Psmd3	11	98.5556	7	24.6467	rs13479153	11.361	0.509
1448492_a_at	Psmd12	11	107.357	7	35.0486	rs13479188	9.98929	0.595
1448503_at	Mcl1	3	95.4653	10	27.6975	gnf10.025.923	10.9789	0.497
1448548_at	Tulp4	17	6.24005	7	30.1445	rs8261944	17.1904	0.096
1448564_at	Cib1	7	87.3722	7	81.4087	rs3656205	14.4534	0.208
1448565_at	Ppp1r11	17	37.0862	11	22.9284	rs6283329	10.8563	0.582
1448567_at	C78915	9	107.44	11	47.9608	rs13481014	12.8675	0.361
1448607_at	Pbef1	12	33.5362	7	30.1445	rs8261944	20.2025	0.016
1448621_a_at	Smpd1	7	112.706	7	45.4563	rs13479226	9.06152	0.332
1448645_at	Msl31	X	165.092	8	60.5952	rs6399377	10.5389	0.383
1448656_at	Cacnb3	15	98.4744	7	35.0486	rs13479188	10.1522	0.506
1448660_at	Arhgdig	17	26.3362	1	40.8786	rs13475827	11.2186	0.53
1448665_at	Dmd	X	82.4498	11	8.73673	rs3714397	13.6622	0.103
1448668_a_at	Irak1	X	71.2606	6	112.817	rs13478978	10.8849	0.614
1448691_at	Ubqln4	3	88.3731	15	56.9906	rs3702158	10.2526	0.501
1448692_at	Ubqln4	3	88.3724	7	24.6467	rs13479153	17.5078	0.032
1448702_at	Ier3ip1	18	77.1689	11	47.9608	rs13481014	10.3937	0.614
1448712_at	Chm	X	110.155	11	19.6458	D11Mit79	19.0914	0.05
1448720_at	Lrrc40	3	157.73	7	30.1445	rs8261944	11.3175	0.422
1448725_at	Parg	14	33.1098	11	8.73673	rs3714397	12.9714	0.35
1448733_at	Bmi1	2	18.6078	11	8.73673	rs3714397	14.5558	0.118
1448737_at	Tspan7	X	10.1732	11	47.9608	rs13481014	14.8198	0.21
1448743_at	Ssx2ip	3	146.103	6	85.7832	rs13478871	18.4951	0.018
1448758_at	Nrbf2	10	66.7297	16	70.0774	rs4199410	11.6206	0.473
1448772_at	Ube2a	X	34.4217	14	118.447	rs13482396	13.007	0.138
1448784_at	Taf10	7	112.891	11	47.9608	rs13481014	13.3322	0.319
1448807_at	Hrh3	2	179.834	17	9.21643	rs13482864	13.882	0.258
1448809_at	Cse1l	2	166.771	11	42.2154	rs3693664	16.8363	0.08
1448812_at	Hpcal1	12	17.7982	12	16.8539	rs6180964	29.2671	0.000234043
1448822_at	Psmb6	11	70.3407	11	69.4181	rs13481087	93.8966	2.66e-05
1448849_at	Mrpl40	16	18.8723	1	165.222	rs4222763	20.3583	0.0095
1448858_at	Ulk2	11	61.591	10	87.0732	CEL-10_87391383	13.5521	0.211
1448863_a_at	Tnfaip1	11	78.3364	7	34.4076	rs6239372	10.2759	0.522
1448885_at	Rap2b	3	61.1695	16	76.5402	rs4206648	11.6508	0.314
1448891_at	Msr2	3	87.055	3	77.9986	rs3672300	38.9878	7.25e-05
1448892_at	Dock7	4	98.6038	7	30.4293	rs8251849	16.2507	0.11
1448893_at	Ncor2	5	125.498	12	82.5076	rs6170344	11.3719	0.468
1448895_a_at	Catna2	6	76.832	14	18.7051	gnf14.013.298	13.1912	0.251
1448907_at	Thop1	10	80.5441	7	30.1445	rs8261944	16.071	0.136
1448916_at	Mafg	11	120.49	15	45.1075	rs13482547	11.1448	0.554
1448921_a_at	Mrps9	1	42.9624	12	105.916	rs13481630	15.5952	0.149
1448952_at	Chd3	11	69.1548	11	64.518	rs3695202	35.005	0.00011
1448956_at	Stard10	7	108.492	7	95.8591	rs13479416	31.5777	8.7e-05
1448997_at	Pscd1	11	118.039	10	122.416	rs13480802	17.7888	0.039
1449001_at	Ivd	2	118.708	2	118.572	UT_2_119.151187	44.0039	4e-06
1449009_at	Tgtp	11	48.8	15	102.188	rs3686133	7.89065	0.519
1449018_at	Pfn1	11	70.4655	11	69.4181	rs13481087	55.1188	7e-06
1449027_at	Rhou	8	126.187	1	20.619	rs3670611	12.3762	0.297
1449054_a_at	Pcbp4	9	106.366	7	15.6199	rs6295100	12.1884	0.373
1449056_at	Mulk	6	40.3515	11	8.73673	rs3714397	11.6158	0.49
1449068_at	Zfp148	16	33.4999	7	26.7766	rs13479163	22.5481	0.0075
1449069_at	Zfp148	16	33.4969	7	30.1445	rs8261944	14.9628	0.161
1449072_a_at	2510005D08Rik	14	58.1686	14	63.66	rs13482225	34.1137	0.00015873
1449080_at	Hdac2	10	36.7179	18	69.6557	rs13483423	11.9175	0.276
1449089_at	Nrip1	16	76.2912	7	26.7766	rs13479163	11.9252	0.427
1449108_at	Fdx1	9	51.7517	2	160.461	rs13476878	14.0405	0.182
1449110_at	Rhob	12	8.50489	7	30.1445	rs8261944	11.7989	0.43
1449115_at	Mtf2	5	108.537	10	87.0732	CEL-10_87391383	10.9344	0.58
1449122_at	LOC137886	4	6.14319	7	111.466	rs13479460	12.4026	0.416
1449124_at	Rgl1	1	154.366	1	154.947	rs13476184	56.1764	1e-06
1449138_at	Sf3b1	1	55.0441	7	30.1445	rs8261944	11.6539	0.504
1449144_at	Gna11	10	80.9935	7	30.1445	rs8261944	11.4735	0.492
1449172_a_at	Lin7b	7	52.6233	16	41.6072	rs3663871	14.8953	0.181
1449173_at	Mpp2	11	101.918	7	24.6467	rs13479153	12.6772	0.313
1449211_at	Bpnt1	1	187.181	9	123.812	rs8254393	9.84349	0.567
1449214_a_at	Opa1	16	29.6288	7	26.7766	rs13479163	11.7816	0.42
1449217_at	Casp8ap2	4	32.7399	11	8.73673	rs3714397	10.3447	0.603
1449248_at	Clcn2	16	20.7034	6	112.817	rs13478978	12.1458	0.37
1449271_a_at	Hebp2	10	18.2606	10	27.6975	gnf10.025.923	13.2159	0.24
1449292_at	Rb1cc1	1	6.23888	7	30.1445	rs8261944	12.0219	0.411
1449298_a_at	Pde1a	2	79.7053	7	30.1445	rs8261944	16.1911	0.075
1449315_at	Odz3	8	49.3133	7	26.7766	rs13479163	10.9634	0.56
1449353_at	Zmat3	3	32.2337	7	26.7766	rs13479163	16.5	0.063
1449381_a_at	Pacsin1	17	27.8448	7	30.1445	rs8261944	13.6158	0.238
1449404_at	Pip5k2a	2	18.7639	7	48.8668	CEL-7_36442524	12.9413	0.261
1449406_at	Cyhr1	15	76.4763	15	28.9905	rs3702361	14.0255	0.234
1449410_a_at	Gas5	1	162.966	1	154.947	rs13476184	43.1021	5e-06
1449420_at	Pde1b	15	103.36	2	139.416	rs13476805	11.5471	0.521
1449446_at	D10Ertd718e	10	105.28	16	91.559	rs4219239	12.4121	0.308
1449471_at	Kcnmb4	10	115.855	1	21.6236	rs6253968	12.3855	0.377
1449474_a_at	Nelf	2	24.9178	7	30.1445	rs8261944	16.5439	0.056
1449511_a_at	Ssbp4	8	73.1214	8	72.7366	rs13460430	31.8359	0.0004
1449530_at	Trps1	15	50.4921	7	26.7766	rs13479163	12.6787	0.353
1449563_at	Cntn1	15	92.17	7	30.1445	rs8261944	19.3279	0.017
1449575_a_at	Gstp2	19	4.04035	7	30.1445	rs8261944	17.6867	0.059
1449680_at	2610021K21Rik	12	100.985	4	31.8934	rs6177140	15.8928	0.102
1449857_at	1200011I18Rik	14	76.4883	19	44.2447	rs13483639	10.9351	0.541
1449870_a_at	Atp6v0a2	5	125.2	7	30.1445	rs8261944	15.1597	0.113
1449878_a_at	Slc12a6	2	112.203	7	26.7766	rs13479163	14.5175	0.171
1449885_at	Tmem47	X	78.3406	12	80.8874	gnf12.078.433	11.538	0.518
1449913_at	Zfp2	11	50.7125	X	128.95	rs13484003	16.1113	0.037
1449934_at	Pura	18	36.4474	15	45.1075	rs13482547	13.1647	0.317
1449942_a_at	Ilk	7	112.891	7	18.8563	D7Mit57	11.567	0.504
1449999_a_at	Cacna2d1	5	15.8716	7	30.1445	rs8261944	18.367	0.012
1450020_at	Cx3cr1	9	119.958	4	49.7924	rs13477695	12.1784	0.252
1450031_at	Aff4	11	53.234	7	26.7766	rs13479163	12.6236	0.323
1450039_at	Usp9x	X	12.7425	2	160.461	rs13476878	11.0798	0.526
1450052_at	Kif2a	13	68.6129	7	26.7766	rs13479163	11.875	0.491
1450056_at	Apc	18	34.4777	7	81.4087	rs3656205	12.4382	0.402
1450071_at	Ash1l	3	88.882	2	160.461	rs13476878	14.1204	0.185
1450072_at	Ash1l	3	88.8827	11	8.73673	rs3714397	16.0505	0.127
1450106_a_at	Evl	12	109.921	X	80.8499	rs13483868	10.8061	0.609
1450113_at	Mpp5	12	79.9397	7	30.1445	rs8261944	13.775	0.224
1450120_at	Scn1a	2	65.6023	7	26.7766	rs13479163	13.3866	0.179
1450121_at	Scn1a	2	66.1089	18	40.07	rs13483314	14.6204	0.183
1450122_at	Ptprg	14	13.058	7	81.4087	rs3656205	14.7756	0.178
1450123_at	Ryr2	13	11.6454	7	26.7766	rs13479163	12.2783	0.406
1450130_at	Xpr1	1	157.127	7	81.4087	rs3656205	13.6116	0.217
1450147_at	Nptxr	15	79.6193	16	10.5091	rs4161101	10.8076	0.59
1450153_at	Gopc	10	52.0592	12	80.8874	gnf12.078.433	11.3609	0.376
1450212_at	Fmnl1	11	103.058	7	30.1445	rs8261944	11.8738	0.426
1450247_a_at	Scamp5	9	57.2915	16	10.5091	rs4161101	15.3534	0.135
1450269_a_at	Pfkl	10	77.4511	7	30.1445	rs8261944	15.9763	0.114
1450319_at	Gabrb2	11	42.4401	11	42.2154	rs3693664	20.9265	0.014
1450333_a_at	Gata2	6	88.1564	8	60.5952	rs6399377	14.2699	0.174
1450339_a_at	Bcl11b	12	109.153	12	108.001	rs13481636	48.551	9e-06
1450393_a_at	Scamp4	10	80.0781	2	160.461	rs13476878	11.285	0.538
1450396_at	Stag2	X	39.6193	7	81.4087	rs3656205	14.7441	0.181
1450397_at	Mtap1b	13	100.205	16	76.5402	rs4206648	12.777	0.282
1450400_at	Ncoa6ip	4	3.52935	7	26.7766	rs13479163	11.8523	0.446
1450401_at	Ncoa6ip	4	3.51842	7	26.7766	rs13479163	13.0133	0.259
1450409_a_at	Slc48a1	15	97.6216	7	112.527	rs3674465	13.7768	0.181
[truncated: 567 more rows]

## Sheet: Sal vs EtOH S-scores
Table S5b: PFC Saline vs Ethanol S-score Paraclique Networks Expression QTL
ProbeSetID	Symbol	Chr	Mb	QTL Chr	QTL Mb	QTL Marker	LRS	p-value
1428886_at	Rbbp5	1	134.402	2	26.6999	mCV23574676	28.1443	0.000769231
1448121_at	Wbp2	11	115.94	7	34.4076	rs6239372	27.7528	0.000909091
1448807_at	Hrh3	2	179.834	13	62.9702	rs13481845	23.4191	0.003
1457412_at	2310004N11Rik	15	100.876	7	44.7592	rs6228386	23.0778	0.003
1434735_at	Hlf	11	90.1979	18	70.5928	rs13483427	23.2779	0.00333333
1452663_at	Svop	5	114.477	7	24.6467	rs13479153	20.9382	0.004
1431028_a_at	Pank1	19	34.8867	11	58.0605	rs13481045	23.6666	0.007
1452287_at	Msi1	5	115.905	13	54.8887	rs13481817	23.7548	0.008
1449362_a_at	Mink1	11	70.4274	7	34.4076	rs6239372	19.9891	0.0085
1434531_at	GnT-IX	11	116.848	13	54.8887	rs13481817	23.0293	0.01
1441603_at	Sstr3	15	78.3676	13	62.9702	rs13481845	21.829	0.01
1447649_x_at	Dnajc1	2	18.2303	11	67.1951	rs3715924	17.6143	0.011
1452105_a_at	Tsc2	17	24.7342	7	15.6199	rs6295100	21.2462	0.011
1426373_at	Ski	4	154.53	7	15.6199	rs6295100	22.6504	0.0115
1450871_a_at	Bcat1	6	144.948	7	34.4076	rs6239372	20.0937	0.0115
1417373_a_at	Tuba4	1	75.2122	3	154.259	rs3716135	16.8321	0.013
1423043_s_at	Fin14	X	12.8692	7	30.1445	rs8261944	20.2609	0.013
1435550_at	Mll2	15	98.6622	7	30.1445	rs8261944	21.8048	0.013
1448534_at	Ptpns1	2	129.456	X	69.2812	DXMit1	22.01	0.013
1450056_at	Apc	18	34.4777	16	67.8069	rs3695481	21.8542	0.013
1415757_at	Gbf1	19	46.3604	7	34.4076	rs6239372	20.6446	0.014
1436073_at	A630007B06Rik	19	56.862	6	95.039	rs13478906	20.5713	0.014
1454959_s_at	Gnai1	5	17.771	16	12.3864	rs4162800	19.3871	0.014
1455230_at	Cacng4	11	107.594	7	35.0486	rs13479188	21.1805	0.014
1419490_at	Fam19a5	15	87.5881	7	30.1445	rs8261944	21.8685	0.015
1424470_a_at	Rapgef3	15	97.5754	15	88.2986	rs13482695	22.2949	0.015
1436737_a_at	Sorbs1	19	40.3693	X	69.2812	DXMit1	17.9263	0.016
1449436_s_at	Ubb	11	62.3666	3	154.259	rs3716135	17.5656	0.016
1455942_at	Fbxl11	19	4.31797	13	54.8887	rs13481817	18.9477	0.016
1423628_s_at	Pcdhga1	18	38.0009	13	54.8887	rs13481817	19.2239	0.017
1448598_at	Mmp17	5	130.113	7	15.6199	rs6295100	21.5747	0.017
1428382_at	Smarcc2	10	127.927	7	18.3679	rs3672220	17.0921	0.018
1429775_a_at	Gpr137b	13	13.4573	4	49.7924	rs13477695	18.2804	0.018
1438969_x_at	Dhx30	9	109.987	7	34.4076	rs6239372	22.5115	0.018
1451403_at	Lrrc68	7	20.1164	13	52.7833	rs6209128	21.6655	0.018
1456243_x_at	Mcl1	3	95.467	2	26.1904	rs3681655	20.4446	0.018
1434661_at	Syngr1	15	79.9494	13	54.8887	rs13481817	21.0132	0.019
1434610_at	Plec1	15	76.0018	7	24.6467	rs13479153	18.712	0.02
1422969_s_at	Ihpk1	9	107.948	16	17.5769	rs4165069	19.0054	0.021
1454900_s_at	Phr1	14	103.555	9	69.7615	rs6355445	21.5129	0.021
1428142_at	Etv5	16	22.3816	7	34.4076	rs6239372	20.2031	0.022
1444028_s_at	Dock9	14	121.942	2	30.263	rs13476408	20.5561	0.023
1424318_at	Hspc159	11	20.7237	12	113.706	rs4229611	19.5154	0.024
1438702_at	Flrt2	12	97.0213	7	30.1445	rs8261944	18.5181	0.024
1458091_at	Dpp10	1	125.704	5	42.4975	rs6276465	15.3297	0.024
1417240_at	Zyx	6	42.3074	7	34.4076	rs6239372	20.6884	0.025
1429712_at	Etohi1	2	175.408	18	73.9701	rs13483437	19.6223	0.025
1440097_at	Mirg	12	110.979	12	113.706	rs4229611	17.9633	0.025
1454784_at	6430516N12Rik	7	128.645	15	88.2986	rs13482695	19.835	0.025
1426249_at	Adrbk1	19	4.28606	13	54.8887	rs13481817	21.1438	0.026
1452958_at	Asphd2	5	112.815	7	24.6467	rs13479153	20.3984	0.026
1425382_a_at	Aqp4	18	15.552	7	30.1445	rs8261944	17.1931	0.027
1428723_at	2310047M10Rik	11	68.8745	15	88.2986	rs13482695	18.0485	0.027
1437991_x_at	Rusc1	3	88.8879	7	34.4076	rs6239372	19.3268	0.027
1416566_at	Strap	6	137.699	15	88.2986	rs13482695	21.229	0.028
1428466_at	Chd3	11	69.1568	13	54.8887	rs13481817	20.9487	0.028
1451461_a_at	Aldoc	11	78.1398	10	27.6975	gnf10.025.923	15.3801	0.028
1460203_at	Itpr1	6	108.501	2	26.6999	mCV23574676	18.6483	0.028
1426998_at	Tex27	17	30.3463	6	95.039	rs13478906	18.2602	0.029
1423621_a_at	Slc33a1	3	63.7464	X	69.2812	DXMit1	18.0002	0.031
1415779_s_at	Actg1	11	120.207	3	154.259	rs3716135	17.0408	0.032
1449380_at	Pacsin1	17	27.8476	13	54.8887	rs13481817	18.6316	0.032
1450685_at	Arpp19	9	74.9076	2	26.6999	mCV23574676	19.7796	0.032
1420955_at	Vsnl1	12	11.3322	7	114.49	rs13479470	18.1408	0.033
1423860_at	Ptgds	2	25.3228	6	92.586	rs6223362	17.8104	0.033
1437744_at	Slitrk4	X	61.5231	7	30.1445	rs8261944	16.8993	0.033
1452209_at	Pkp4	2	59.1927	11	22.9284	rs6283329	18.1959	0.033
1455757_at	Acad9	3	36.0651	11	58.0605	rs13481045	19.4601	0.033
1423220_at	Eif4e	3	138.219	8	72.7366	rs13460430	16.8161	0.034
1435754_at	Zyg11b	4	107.902	2	30.263	rs13476408	18.4229	0.035
1449018_at	Pfn1	11	70.4655	11	13.5744	rs3673722	18.4668	0.035
1418078_at	Psme3	11	101.184	13	52.7833	rs6209128	17.4314	0.036
1425940_a_at	Ssbp3	4	106.719	13	52.7833	rs6209128	20.0321	0.036
1427993_at	Rufy2	10	62.4742	16	12.3864	rs4162800	19.1274	0.036
1432842_s_at	Ywhaq	12	21.3967	7	115.203	mCV24779699	18.6231	0.036
1432827_x_at	Ubc	5	125.676	9	81.6566	rs3673457	15.7845	0.038
1451066_at	Mboat7	7	3.62969	13	54.8887	rs13481817	18.3264	0.038
1426870_at	Fbxo33	12	87.5716	16	12.3864	rs4162800	18.8414	0.039
1416753_at	Prkar1b	5	139.493	7	30.1445	rs8261944	18.7325	0.04
1428086_at	Dnm1l	16	16.3124	9	69.7615	rs6355445	16.8898	0.04
1434635_at	Rph3a	5	121.391	7	34.4076	rs6239372	17.3884	0.04
1454809_at	Ncoa7	10	30.3656	2	26.6999	mCV23574676	19.2261	0.041
1435256_at	Alkbh6	7	31.0928	13	54.8887	rs13481817	19.6385	0.042
1436180_at	Dnajc5	2	181.287	2	26.6999	mCV23574676	18.7058	0.042
1427592_at	Pcdh7	5	58.3045	19	38.9008	rs6185741	17.6812	0.044
1448991_a_at	Ina	19	47.0986	7	34.4076	rs6239372	18.2717	0.044
1421189_at	Gabrb3	7	65.0717	19	38.9008	rs6185741	18.7305	0.045
1428291_at	Exosc8	3	54.5328	14	71.699	rs13482251	16.8888	0.045
1435889_at	Mark2	19	7.34992	13	54.8887	rs13481817	18.7463	0.045
1436047_at	Gm672	18	75.591	13	54.8887	rs13481817	16.5358	0.045
1447707_s_at	Pde2a	7	108.661	2	26.6999	mCV23574676	16.8983	0.045
1450667_a_at	Cs	10	127.799	11	35.5312	D11Mit231	18.1565	0.045
1419811_at	Adcy9	16	4.2851	7	34.4076	rs6239372	18.5878	0.046
1427877_at	Lerepo4	2	83.4982	11	58.0605	rs13481045	18.1371	0.046
1456057_x_at	Tmem109	19	10.9452	16	12.3864	rs4162800	16.6084	0.046
1420196_s_at	Tbc1d14	5	36.8333	2	30.263	rs13476408	18.019	0.047
1428073_a_at	Nup88	11	70.7567	7	36.4787	rs13479194	18.6803	0.047
1418324_at	Fem1b	9	62.6397	2	26.6999	mCV23574676	17.394	0.048
1433460_at	Ttc7b	12	101.539	13	54.8887	rs13481817	17.5484	0.048
1455298_at	Id4	13	48.3608	13	54.8887	rs13481817	19.4161	0.048
1426887_at	Nudt11	X	5.63131	15	88.2986	rs13482695	18.6786	0.049
1455246_at	Smarcc1	9	110.142	15	88.2986	rs13482695	19.125	0.049
1416079_a_at	Arpc1a	5	145.866	15	88.2986	rs13482695	18.4428	0.05
1417432_a_at	Gnb1	4	154.931	11	20.8533	rs3023251	15.8652	0.05
1436874_x_at	Slc25a5	X	34.3378	13	82.3323	rs3686754	15.67	0.05
1452812_at	Lphn1	8	86.4634	13	54.8887	rs13481817	17.6858	0.05
1456015_x_at	Ndufv1	19	4.00753	16	12.3864	rs4162800	17.2819	0.05
1459639_at	Brsk2	7	149.184	16	12.3864	rs4162800	17.7842	0.05
1423561_at	Nell2	15	95.05	13	54.8887	rs13481817	18.4191	0.051
1423593_a_at	Csf1r	18	61.2898	15	88.2986	rs13482695	17.9236	0.051
1443528_at	Ttbk1	17	46.5794	7	34.4076	rs6239372	17.0977	0.051
1448670_at	Ube2e3	2	78.7602	19	47.1974	rs13483649	18.7776	0.051
1437995_x_at	2011-09-07	9	25.116	7	114.49	rs13479470	17.7753	0.052
1450431_a_at	Nedd4	9	72.5971	18	70.9106	gnf18.069.064	14.8117	0.052
1416793_at	Arl6ip2	17	80.2485	2	26.1904	rs3681655	17.689	0.053
1434842_s_at	Upf3b	X	34.6317	15	88.2986	rs13482695	18.7868	0.053
1452196_a_at	Nckap1	2	80.3407	2	26.6999	mCV23574676	17.9302	0.053
1455388_at	A030012M09Rik	1	7.161	7	30.1445	rs8261944	16.4009	0.053
1455548_at	Dlgap4	2	156.59	13	54.8887	rs13481817	17.7948	0.053
1437309_a_at	Rpa1	11	75.1139	7	34.4076	rs6239372	16.6884	0.054
1419401_at	Asb13	13	3.65045	18	70.9106	gnf18.069.064	17.5475	0.055
1423892_at	Apbb1	7	112.707	9	69.7615	rs6355445	16.5859	0.055
1428108_x_at	Tmcc2	1	134.253	7	15.6199	rs6295100	15.9778	0.055
1422714_at	Ube2i	17	25.3975	X	69.2812	DXMit1	17.383	0.056
1435823_x_at	Egfl7	2	26.4476	11	4.40873	rs3659787	16.7518	0.056
1426849_at	Sec24b	3	129.699	16	12.3864	rs4162800	17.597	0.057
1427037_at	Eif4g1	16	20.6821	16	12.3864	rs4162800	18.2106	0.057
1450659_at	Rgs7	1	176.989	6	95.039	rs13478906	17.3085	0.057
1458499_at	Pde10a	17	9.17792	19	47.1974	rs13483649	17.425	0.058
1416331_a_at	Nfe2l1	11	96.6789	7	34.4076	rs6239372	17.3961	0.059
1436754_at	AI839735	12	113.739	15	88.2986	rs13482695	17.5069	0.059
1423165_a_at	Mta2	19	9.02618	X	69.2812	DXMit1	17.2569	0.06
1425691_at	B3gat1	9	26.5675	13	54.8887	rs13481817	16.9902	0.06
1433965_at	Atp8a1	5	68.0095	5	133.347	rs13478539	16.3258	0.06
1440193_at	Ankrd12	17	66.3364	11	58.0605	rs13481045	17.7161	0.06
1424767_at	Cdh22	2	164.937	7	24.6467	rs13479153	17.4417	0.061
1437195_x_at	Mapk10	5	103.341	7	114.49	rs13479470	16.0897	0.061
1437974_a_at	Hk1	10	61.7319	13	54.8887	rs13481817	17.8419	0.061
1424757_at	Lppr2	9	21.7528	13	52.7833	rs6209128	18.6018	0.062
1439043_at	1500010G04Rik	6	49.213	1	108.459	rs6174159	16.6064	0.062
1433866_x_at	Prdx1	4	116.372	18	70.9106	gnf18.069.064	16.2614	0.063
1436946_s_at	Gng5	3	146.168	18	70.9106	gnf18.069.064	16.5674	0.063
1452758_s_at	Eif4g2	7	118.215	7	114.49	rs13479470	16.3531	0.063
1426422_at	Cc2d1a	8	86.6568	7	24.6467	rs13479153	18.24	0.064
1452156_a_at	Nisch	14	31.9841	2	26.6999	mCV23574676	17.6538	0.065
1460635_at	Fastk	5	23.9472	15	88.2986	rs13482695	16.3174	0.065
1418005_at	Sdhb	4	140.535	13	82.3323	rs3686754	14.539	0.066
1426648_at	Mapkapk2	1	132.951	15	88.2986	rs13482695	17.3231	0.066
1456257_at	Fam126b	1	58.5816	2	26.6999	mCV23574676	17.7566	0.066
1419246_s_at	Rab14	2	35.0358	11	24.5727	rs3677232	16.824	0.067
1422670_at	Rohn	11	101.333	15	88.2986	rs13482695	17.4292	0.067
1448405_a_at	Cri1	2	125.5	18	70.9106	gnf18.069.064	14.7235	0.067
1450202_at	Grin1	2	25.15	7	24.6467	rs13479153	17.1801	0.067
1433890_a_at	Bat3	17	35.2827	7	15.6199	rs6295100	17.3104	0.068
1448245_at	Lamr1	9	120.04	10	28.1392	rs6391751	17.4641	0.068
1421446_at	Prkcc	7	129.726	13	54.8887	rs13481817	16.8304	0.07
1423773_at	Gpbp1	13	112.217	7	34.4076	rs6239372	16.7501	0.07
1424820_a_at	Ndfip1	18	38.6247	7	114.49	rs13479470	16.8606	0.07
1455137_at	Rapgef5	12	118.998	5	132.412	D5Mit372	17.6518	0.07
1427039_at	Epn1	7	5.04924	7	34.4076	rs6239372	17.6478	0.071
1428095_a_at	Tmem24	9	44.1184	13	54.8887	rs13481817	17.6762	0.071
1454759_at	Git1	11	77.3207	7	15.6199	rs6295100	17.7173	0.071
1455410_at	Faim2	15	99.3277	13	62.9702	rs13481845	16.7071	0.071
1458670_at	Adarb2	13	8.76053	5	39.9256	rs3703261	15.6483	0.071
1423766_at	Pak1ip1	13	41.1077	16	67.8069	rs3695481	15.3323	0.072
1434032_at	Centg3	5	23.9886	15	88.2986	rs13482695	17.3114	0.072
1419069_at	Rabgef1	5	130.689	9	65.2632	rs3655717	16.9125	0.073
1422321_a_at	Zfp162	19	6.37566	X	69.2812	DXMit1	16.6945	0.073
1422799_at	Bat2	17	35.2861	7	34.4076	rs6239372	16.8398	0.073
1423802_at	Camkv	9	107.851	13	54.8887	rs13481817	17.9616	0.073
1423961_at	Wdr26	1	183.106	2	72.2026	rs13476571	16.8812	0.073
1434825_at	2810442I22Rik	5	143.201	13	52.7833	rs6209128	16.7313	0.073
1455176_a_at	Syt11	3	88.549	7	34.4076	rs6239372	16.2429	0.073
1429047_at	Spint1	2	119.56	6	95.039	rs13478906	16.287	0.074
1428939_s_at	Gnaq	19	16.46	13	20.4452	rs3676630	16.7257	0.075
1437257_at	Wdr47	3	108.422	19	38.9008	rs6185741	15.8738	0.075
1438634_x_at	Lasp1	11	97.7	16	12.3864	rs4162800	14.9952	0.075
1456743_x_at	Morf4l2	X	133.268	16	12.3864	rs4162800	16.2731	0.075
1439538_at	0610011N22Rik	13	74.4996	6	105.778	rs13478951	15.3214	0.076
1415688_at	Ube2g1	11	72.4976	13	62.9702	rs13481845	15.9983	0.077
1418047_at	Neurod6	6	55.6279	7	114.49	rs13479470	16.1467	0.077
1426366_at	Eif2c2	15	72.9368	11	58.0605	rs13481045	16.4521	0.077
1435960_at	Pnmal2	7	17.5336	13	54.8887	rs13481817	17.7819	0.077
1438703_at	5730521P14Rik	6	118.453	5	20.7593	rs6256752	15.6368	0.077
1418535_at	Rgl1	1	154.365	7	15.6199	rs6295100	16.6405	0.078
1427564_at	Diap2	X	126.995	4	49.7924	rs13477695	16.8821	0.078
1448484_at	Amd1	10	40.0075	2	26.6999	mCV23574676	17.3534	0.078
1452740_at	Myh10	11	68.6295	2	26.6999	mCV23574676	17.5651	0.078
1454953_at	St6galnac2	11	116.198	7	18.3679	rs3672220	17.1163	0.078
1435030_at	Upf2	2	5.97721	2	30.263	rs13476408	17.077	0.079
1439833_at	2011-09-03	15	82.1248	13	54.8887	rs13481817	16.7179	0.079
1450418_a_at	Yipf4	17	74.8987	18	70.9106	gnf18.069.064	16.9811	0.079
1451422_at	Myo18a	11	77.679	7	15.6199	rs6295100	15.9635	0.079
1416852_a_at	Ncdn	4	126.421	13	54.8887	rs13481817	16.6465	0.08
1455140_at	AI848332	11	71.8612	13	54.8887	rs13481817	14.3855	0.08
1415746_at	Cic	7	26.0786	7	34.4076	rs6239372	17.1865	0.081
1451046_at	Zfpm1	8	124.861	7	35.0486	rs13479188	16.1129	0.081
1453104_at	Mapk1	16	17.047	2	26.6999	mCV23574676	17.0452	0.081
1428936_at	Atp2b1	10	98.4497	11	58.0605	rs13481045	16.7623	0.082
1449020_at	Plscr3	11	69.6642	7	44.7592	rs6228386	17.5106	0.082
1428430_at	Rgmb	17	15.9432	16	12.3864	rs4162800	16.8615	0.083
1437773_x_at	Ddx17	15	79.3582	X	69.2812	DXMit1	16.6251	0.083
1457605_at	Atxn1	13	45.6989	11	58.0605	rs13481045	14.9104	0.083
1420834_at	Vamp2	11	68.9053	7	34.4076	rs6239372	17.8865	0.084
1425601_a_at	Rtkn	6	83.102	6	95.039	rs13478906	17.1274	0.084
1429064_at	Dip2c	13	9.66768	2	26.6999	mCV23574676	16.6697	0.084
1438961_s_at	Blmh	11	76.8007	2	30.263	rs13476408	17.7052	0.084
1435558_at	Bai2	4	129.699	13	54.8887	rs13481817	17.0647	0.085
1435758_at	B4galt6	18	20.8432	12	114.377	CEL-12_108727612	16.2125	0.085
1438652_x_at	Pigq	17	26.0634	2	26.1904	rs3681655	16.9682	0.085
1423519_at	2210412D01Rik	7	91.2583	15	88.2986	rs13482695	16.8667	0.086
1429463_at	Prkaa2	4	104.708	7	26.7766	rs13479163	14.9503	0.086
1436153_a_at	Zmynd11	13	9.6841	X	69.2812	DXMit1	16.3945	0.086
1437527_x_at	Mcl1	3	95.467	2	26.1904	rs3681655	15.718	0.086
1427075_s_at	Pcmtd2	2	181.592	15	79.5	rs4230869	15.0086	0.087
1428383_a_at	2310021P13Rik	14	21.5422	7	15.6199	rs6295100	15.9699	0.087
1422017_s_at	KIAA1191	13	54.6606	11	4.40873	rs3659787	15.5624	0.088
1441312_at	Cnnm1	19	43.5706	7	15.6199	rs6295100	14.7203	0.088
1452913_at	Pcp4l1	1	173.104	9	69.7615	rs6355445	14.7465	0.088
1453120_at	Txndc13	2	134.42	2	30.263	rs13476408	17.3163	0.088
1456381_x_at	Mcl1	3	95.467	2	30.263	rs13476408	16.0054	0.088
1420861_at	Dctn4	18	60.7178	7	114.49	rs13479470	15.888	0.089
1435392_at	Wdr17	8	55.7151	7	34.4076	rs6239372	17.0423	0.089
1452981_at	Cntn1	15	92.1717	6	77.4513	rs3663024	17.0332	0.089
1453263_at	Mak10	13	59.7023	18	70.9106	gnf18.069.064	16.5194	0.089
1431749_a_at	Rasgrp1	2	117.124	19	38.9008	rs6185741	17.1257	0.09
1450928_at	Id4	13	48.3591	11	22.9284	rs6283329	15.8494	0.09
1415728_at	Pabpn1	14	55.5172	7	34.4076	rs6239372	13.1941	0.091
1419757_at	Pitpnm2	5	124.569	7	15.6199	rs6295100	16.5482	0.091
1449506_a_at	Eef1d	15	75.726	X	156.93	gnfX.141.820	15.7447	0.091
1416578_at	Rbx1	15	81.3062	6	95.039	rs13478906	16.6288	0.092
1416853_at	Ncdn	4	126.421	13	54.8887	rs13481817	17.083	0.092
1418015_at	Pum2	12	8.7556	13	54.8887	rs13481817	16.7417	0.092
1418655_at	Galgt1	10	126.609	15	88.2986	rs13482695	16.1823	0.092
1418711_at	Pdgfa	5	139.453	15	88.2986	rs13482695	16.0433	0.092
1422797_at	Mapbpip	3	88.3539	13	71.4696	rs13481870	15.6782	0.092
1433494_at	Dos	10	79.5936	13	54.8887	rs13481817	16.531	0.092
1455470_x_at	Lasp1	11	97.6998	X	69.2812	DXMit1	14.1177	0.092
1425837_a_at	Ccrn4l	3	51.055	19	28.4693	D19Msw029	16.7976	0.094
1437035_x_at	Rnf14	18	38.4773	16	12.3864	rs4162800	16.4308	0.094
1437765_at	Cpeb3	19	37.0964	7	30.1445	rs8261944	15.4365	0.094
1448172_at	Mdh1	11	21.4592	18	16.5577	rs6358426	15.1066	0.095
1448262_at	Psmb2	4	126.364	11	4.40873	rs3659787	14.5362	0.095
1455855_x_at	Hnrpab	11	51.4144	X	69.2812	DXMit1	16.514	0.095
1421323_a_at	G3bp2	5	92.4836	11	58.0605	rs13481045	15.1613	0.096
1422692_at	Rpo2tc1	15	11.9113	7	35.0486	rs13479188	16.9385	0.098
1434475_at	Ppig	2	69.591	7	30.1445	rs8261944	15.5125	0.098
1455518_at	9330162L04Rik	4	133.161	15	88.2986	rs13482695	16.5799	0.098
1423459_at	Cops2	2	125.658	6	95.039	rs13478906	15.6039	0.099
1435026_at	Spock2	10	59.5974	7	34.4076	rs6239372	15.7036	0.099
1441988_at	Ppm1k	6	57.4588	1	79.6852	D1Mit216	15.5961	0.099
1417825_at	Esd	14	8.07488	13	76.2302	rs3664096	15.8107	0.1
1435714_x_at	Il17d	14	58.1617	18	70.9106	gnf18.069.064	16.0276	0.1
1452100_at	Dullard	11	69.8031	7	34.4076	rs6239372	15.8106	0.1
1425466_at	Senp2	16	22.0473	15	28.443	rs13482498	14.6867	0.101
1438510_a_at	Hars	18	36.9262	9	34.3263	rs6258765	15.5207	0.101
1415803_at	Cx3cl1	8	97.3058	7	34.4076	rs6239372	15.6546	0.102
1424581_at	Stac2	11	97.8983	7	34.4076	rs6239372	14.6972	0.102
1448691_at	Ubqln4	3	88.3731	7	34.4076	rs6239372	15.2992	0.102
1450668_s_at	Hspe1	1	55.1459	19	47.1974	rs13483649	16.5353	0.103
1419994_s_at	D10Ertd641e	10	59.4507	8	97.2916	rs6373291	15.7163	0.104
1431339_a_at	Efhd2	4	141.415	15	88.2986	rs13482695	15.9551	0.104
1433772_at	Stch	16	75.7555	9	123.812	rs8254393	16.1421	0.105
1451665_a_at	Ap4s1	12	52.8179	13	71.4696	rs13481870	15.4503	0.105
1460566_at	Mtap1a	2	121.135	15	88.2986	rs13482695	15.4739	0.105
1427965_at	Ssbp1	6	40.4309	19	44.2447	rs13483639	15.6277	0.106
1428955_x_at	Slc9a3r2	17	24.7762	X	54.1151	rs13483766	16.539	0.106
1437001_at	Gsk3b	16	38.2435	11	58.0605	rs13481045	15.2222	0.106
1434814_x_at	Gpi1	7	34.9872	10	28.1392	rs6391751	16.0166	0.107
1456170_x_at	Calr	8	87.3662	7	30.4293	rs8251849	16.1558	0.107
1427100_at	Metrn	17	25.932	15	88.2986	rs13482695	15.8521	0.108
1436834_x_at	Mdh1	11	21.4573	7	114.49	rs13479470	15.8523	0.108
1446065_at	Kcnd2	6	21.4516	15	88.2986	rs13482695	16.3208	0.108
1450354_a_at	Ptdss2	7	148.341	3	142.572	rs6290401	15.8843	0.108
1455714_at	Gm691	2	157.77	7	30.1445	rs8261944	16.953	0.108
1460580_at	Pcnx	12	83.1014	16	67.8069	rs3695481	15.6971	0.108
1425196_a_at	Hint2	4	43.6672	11	79.0684	rs13481117	15.7344	0.11
1456577_x_at	Pitrm1	13	6.57906	7	113.857	rs3657482	15.0927	0.11
1423544_at	Ptpn5	7	54.3335	7	34.4076	rs6239372	16.0898	0.111
1423967_at	Palm	10	79.2831	13	54.8887	rs13481817	15.7312	0.111
1455363_at	Bai1	15	74.4194	7	15.6199	rs6295100	16.3638	0.111
1455023_at	N28178	4	42.9539	19	38.9008	rs6185741	16.4587	0.112
1455883_a_at	Lrrtm1	6	77.1954	16	12.3864	rs4162800	15.1964	0.112
1459019_at	Sprn	7	147.338	16	12.3864	rs4162800	15.9622	0.112
1454664_a_at	Eif5	12	112.778	11	58.0605	rs13481045	15.6679	0.113
1456429_at	Malt1	18	65.6138	4	49.7924	rs13477695	16.0956	0.113
1460698_a_at	Sec11l3	18	65.9745	18	70.9106	gnf18.069.064	15.0748	0.113
1423646_at	Zdhhc3	9	122.986	7	34.4076	rs6239372	15.9048	0.114
1424954_a_at	Pip5k1c	10	80.7822	15	88.2986	rs13482695	16.1536	0.115
1434095_at	Unc5a	13	55.1068	7	15.6199	rs6295100	15.8346	0.115
1456620_at	GNPTAB	10	87.9061	16	63.7153	rs4151935	15.2513	0.115
1447825_x_at	Pcdh8	14	80.1666	9	123.812	rs8254393	15.2921	0.116
1457423_at	Vgcnl1	14	123.676	2	30.263	rs13476408	14.5614	0.116
1424738_at	4932432K03Rik	14	49.7065	7	30.1445	rs8261944	14.15	0.117
1432158_a_at	Trappc2	X	162.891	16	12.3864	rs4162800	15.0004	0.117
1439740_s_at	Uck2	1	169.153	7	15.6199	rs6295100	14.9577	0.117
1449932_at	Csnk1d	11	120.824	10	122.416	rs13480802	15.6709	0.117
1421500_at	Prdm16	4	153.929	7	36.4787	rs13479194	17.005	0.118
1429685_at	Gabrb2	11	42.4436	7	30.1445	rs8261944	14.5029	0.118
1434417_at	Solh	17	26.0955	7	15.6199	rs6295100	15.1161	0.118
1424472_at	Nol6	4	41.0617	7	15.6199	rs6295100	15.1644	0.119
1426982_at	Flywch1	17	23.8898	13	54.8887	rs13481817	16.1788	0.119
1427023_at	Phyhipl	10	70.0217	15	88.2986	rs13482695	14.3851	0.119
1428118_at	Lrrn6a	9	56.467	7	15.6199	rs6295100	16.4039	0.119
1434288_at	Bivm	1	44.2008	5	132.412	D5Mit372	15.5668	0.119
1451435_at	Cutl1	5	136.724	11	8.73673	rs3714397	15.1798	0.119
1457712_at	AW549269	14	52.8308	15	88.2986	rs13482695	14.4405	0.119
1419224_at	Cecr6	6	120.439	15	88.2986	rs13482695	14.925	0.12
1423598_at	Atp8a1	5	68.012	10	123.018	rs6282839	15.2844	0.12
1451828_a_at	Acsl4	X	138.755	10	123.018	rs6282839	14.7365	0.12
1418137_at	Mrp63	14	58.4454	2	128.065	rs6411422	15.5911	0.121
1420613_at	Ptp4a2	4	129.522	11	58.0605	rs13481045	15.3772	0.121
1422972_s_at	Gcn5l2	11	100.567	7	24.6467	rs13479153	15.5974	0.121
1456357_at	5430439G14Rik	2	38.9247	7	30.1445	rs8261944	15.2142	0.121
1428231_at	Cpsf6	10	116.782	18	73.9701	rs13483437	15.6168	0.122
1417728_at	Mbd3	10	79.8557	15	88.2986	rs13482695	16.005	0.123
1436947_a_at	Txnl1	18	63.8238	18	70.9106	gnf18.069.064	15.7025	0.123
1449694_s_at	Commd5	15	76.7313	9	71.2818	rs13459110	14.917	0.123
1450106_a_at	Evl	12	109.921	15	88.2986	rs13482695	15.8064	0.123
1417628_at	Supt6h	11	78.0205	7	15.6199	rs6295100	15.1751	0.124
1436743_at	Igsf4d	16	66.6606	14	118.847	rs6265743	15.5907	0.124
1437968_at	Grin1	2	25.1467	13	54.8887	rs13481817	16.2328	0.124
1433834_at	2011-03-06	15	31.3857	2	26.6999	mCV23574676	15.8429	0.125
1455884_at	Dpp9	17	56.3264	15	45.1075	rs13482547	14.6684	0.125
1459532_at	Grm7	6	111.447	5	45.6445	rs13478223	15.1735	0.125
1419067_a_at	Rabgef1	5	130.69	16	12.3864	rs4162800	15.6101	0.126
1436858_at	Mbnl2	14	120.778	6	95.039	rs13478906	15.4525	0.126
1456041_at	Snx16	3	10.4184	18	70.9106	gnf18.069.064	15.965	0.126
1436495_s_at	Zfp260	7	30.8925	2	30.263	rs13476408	14.5483	0.127
1450891_at	Srp19	18	34.4941	16	12.3864	rs4162800	15.2122	0.127
1455801_x_at	Tbcd	11	121.478	6	65.0374	rs13478801	16.0347	0.127
1436577_at	Arhgef9	X	92.2455	7	40.3789	rs6206014	15.3251	0.128
1448280_at	Syp	X	7.2298	9	71.2818	rs13459110	15.23	0.128
1449056_at	Mulk	6	40.3515	2	26.6999	mCV23574676	15.3715	0.128
1452096_s_at	Lin10	8	107.777	6	95.039	rs13478906	15.4319	0.128
1452269_at	Spnb3	19	4.75179	7	15.6199	rs6295100	14.5363	0.128
1454454_at	Elavl2	4	90.9187	9	71.2818	rs13459110	15.2716	0.128
1424640_at	Arl8a	1	137.052	15	88.2986	rs13482695	15.7063	0.129
1426841_at	Ythdf3	3	16.1158	5	132.412	D5Mit372	15.0913	0.129
1437828_s_at	Bing4	17	34.0863	15	88.2986	rs13482695	15.2485	0.129
1446720_at	Alcam	16	52.2613	15	88.2986	rs13482695	15.5175	0.129
1451669_at	Ppm1b	17	85.416	6	95.039	rs13478906	15.4179	0.129
1426380_at	Eif4b	15	101.927	18	70.5928	rs13483427	15.654	0.13
1432408_a_at	AK013560	7	68.3426	15	88.2986	rs13482695	15.6477	0.13
1418430_at	Kif5b	18	6.22532	11	58.0605	rs13481045	15.7002	0.131
1424212_at	9430023L20Rik	15	101.121	13	71.4696	rs13481870	13.598	0.131
1426407_at	Cugbp1	2	90.8592	7	34.4076	rs6239372	15.4707	0.131
1433932_x_at	Thrap5	10	79.3729	9	69.7615	rs6355445	15.1652	0.131
1446565_at	Man1a2	3	100.429	11	67.1951	rs3715924	14.1418	0.131
1453744_a_at	Ankrd40	11	94.1997	13	54.8887	rs13481817	14.8607	0.131
1460741_x_at	C6orf106	17	27.8886	7	15.6199	rs6295100	15.0316	0.131
1428340_s_at	Atp13a2	4	140.563	13	54.8887	rs13481817	16.0522	0.132
1433654_at	Mgea5	19	45.8248	2	26.6999	mCV23574676	15.4812	0.132
1438610_a_at	Cryz	3	154.286	16	12.3864	rs4162800	14.3477	0.132
1455597_at	AI585793	18	32.3958	5	132.412	D5Mit372	16.4627	0.132
1429981_a_at	4933426K21Rik	6	122.407	15	28.9905	rs3702361	14.5558	0.133
1433634_at	Irf2bp2	8	129.115	1	79.6852	D1Mit216	14.6541	0.133
1417434_at	Gpd2	2	57.2165	4	44.3385	gnf04.041.337	16.4869	0.134
1421166_at	Atrn	2	130.853	19	38.9008	rs6185741	15.8386	0.134
1433751_at	Slc39a10	1	53.4532	2	26.6999	mCV23574676	15.4104	0.134
1434481_at	Hampin	11	98.6618	15	88.2986	rs13482695	15.3956	0.134
1439108_at	Mll5	5	23.0018	4	44.3385	gnf04.041.337	14.8306	0.135
1450903_at	Rad23b	4	55.4036	13	54.8887	rs13481817	14.4901	0.135
1457213_a_at	Dgkh	14	78.9785	16	67.8069	rs3695481	15.3764	0.135
1435103_x_at	Farslb	1	78.4217	X	69.2812	DXMit1	13.9436	0.136
1437343_x_at	Atad3a	4	155.115	9	81.6566	rs3673457	15.4754	0.136
1437591_a_at	Wdr1	5	38.9182	16	12.3864	rs4162800	15.1017	0.136
1440179_x_at	Rnf217	10	31.2218	2	30.263	rs13476408	15.5194	0.136
1452731_x_at	LOC544988	14	4.97938	16	76.5402	rs4206648	15.1842	0.136
1420947_at	Atrx	X	103.071	11	58.0605	rs13481045	15.0502	0.137
1423299_at	Txnl1	18	63.8351	1	20.619	rs3670611	14.6513	0.137
1449404_at	Pip5k2a	2	18.7639	6	77.4513	rs3663024	15.3251	0.137
1419975_at	Scp2	4	107.717	16	12.3864	rs4162800	15.2361	0.138
1424207_at	Smarca5	8	83.2345	3	3.77107	rs13476950	14.6278	0.138
1423641_s_at	Cnot7	8	41.578	11	35.5312	D11Mit231	15.4984	0.139
1430500_s_at	Mtx2	2	74.7074	16	67.8069	rs3695481	14.7351	0.139
1433897_at	AI597468	10	84.5797	X	69.2812	DXMit1	15.3676	0.139
1450918_s_at	Src	2	157.297	7	34.4076	rs6239372	15.5639	0.139
1458439_a_at	2310047C04Rik	16	48.9485	11	58.0605	rs13481045	13.8492	0.139
1424179_at	Plekhj1	10	80.2592	1	22.1536	mCV23695025	14.2106	0.14
1424588_at	Srgap3	6	112.668	2	26.6999	mCV23574676	15.6867	0.14
1448298_at	Tnk2	16	32.683	13	54.8887	rs13481817	15.6442	0.14
1450927_at	Lztr1	16	17.5253	X	69.2812	DXMit1	15.2852	0.14
1419045_at	Slc25a23	17	57.1833	7	34.4076	rs6239372	15.3609	0.141
1425328_at	Fam76a	4	132.455	18	70.9106	gnf18.069.064	14.0919	0.141
1428624_at	Magt1	X	103.163	2	26.1904	rs3681655	14.6332	0.141
1433784_at	9030612M13Rik	17	32.9025	2	26.1904	rs3681655	15.6407	0.141
1433908_a_at	Cttn	7	151.622	16	12.3864	rs4162800	15.5549	0.141
1458410_at	Garnl1	12	56.8136	19	38.9008	rs6185741	14.9182	0.141
1435025_at	4930415J21Rik	8	96.5913	2	26.6999	mCV23574676	14.1913	0.142
1435105_at	1110061N23Rik	2	25.0992	15	88.2986	rs13482695	15.2904	0.142
1438780_at	Stx1bl	7	134.948	7	34.4076	rs6239372	13.8114	0.142
1451291_at	Obfc2b	10	127.838	9	69.7615	rs6355445	15.4461	0.142
1451595_a_at	Kcnq2	2	180.81	2	26.6999	mCV23574676	14.7919	0.142
1452779_at	3110006E14Rik	13	69.842	7	34.4076	rs6239372	15.5155	0.142
1427045_at	Synpo	18	60.7599	13	54.8887	rs13481817	15.7638	0.143
1435387_at	AI505012	15	91.0982	5	132.412	D5Mit372	15.5708	0.143
1447669_s_at	Gng4	13	13.92	16	12.3864	rs4162800	14.8697	0.143
1451884_a_at	Lsm2	17	35.1196	15	88.2986	rs13482695	14.4141	0.143
1455481_at	Ids	X	67.5964	7	136.447	rs6159179	15.7321	0.143
1456438_x_at	Rpn1	6	88.0538	2	26.1904	rs3681655	15.1215	0.143
1438668_x_at	Atxn2l	7	133.636	7	34.4076	rs6239372	15.182	0.144
1416537_at	Creld1	6	113.443	7	34.4076	rs6239372	13.6063	0.145
1450269_a_at	Pfkl	10	77.4511	13	54.8887	rs13481817	14.449	0.145
1454961_at	Synj1	16	90.9365	2	26.6999	mCV23574676	15.538	0.145
1437267_x_at	Hnrph1	11	50.1999	7	113.857	rs3657482	15.2056	0.146
1418784_at	Grik5	7	25.7949	15	88.2986	rs13482695	15.2713	0.147
1421064_at	Mpp5	12	79.9385	7	30.1445	rs8261944	14.0647	0.147
1421112_at	Nkx2-2	2	147.009	15	88.2986	rs13482695	13.2888	0.147
1423054_at	Wdr1	5	38.9188	X	69.2812	DXMit1	15.1486	0.147
1438629_x_at	Grn	11	102.298	5	127.857	rs3663155	14.0171	0.147
1444430_at	Armc8	9	99.4072	11	58.0605	rs13481045	13.7336	0.147
1451168_a_at	Arhgdia	11	120.439	7	34.4076	rs6239372	15.2159	0.147
1451495_at	Wac	18	7.92693	7	34.4076	rs6239372	15.1978	0.147
1454023_a_at	D1Bwg1363e	1	75.4715	7	24.6467	rs13479153	14.3557	0.147
1421867_at	Nr3c1	18	39.572	19	47.1974	rs13483649	14.5853	0.148
1452116_s_at	Atf2	2	73.6546	11	19.6458	D11Mit79	15.0455	0.148
1416986_a_at	Sirpa	2	129.444	X	69.2812	DXMit1	15.7218	0.149
1417881_at	Slc39a3	10	80.4914	13	54.8887	rs13481817	15.2483	0.149
1418400_at	Larp6	9	60.5858	15	88.2986	rs13482695	15.691	0.15
1422034_a_at	Palm	10	79.2824	13	54.8887	rs13481817	15.4216	0.15
1454875_a_at	Rbbp4	4	129.006	6	124.022	gnf06.122.747	14.4672	0.15
1456415_at	Zfp451	1	33.8546	6	95.039	rs13478906	15.5123	0.15
1452284_at	Ptprz1	6	23.0024	9	69.7615	rs6355445	15.2765	0.151
1453317_a_at	Khdrbs3	15	68.8798	15	88.2986	rs13482695	14.2923	0.151
1423978_at	Sbk1	7	133.438	13	54.8887	rs13481817	14.8855	0.152
1432344_a_at	Aplp2	9	30.9795	16	12.3864	rs4162800	15.2385	0.152
1439257_x_at	Rpn1	6	88.0538	16	12.3864	rs4162800	14.9592	0.152
1454802_x_at	Arih2	9	108.505	15	88.2986	rs13482695	15.2766	0.152
1457175_at	Numb	12	85.1535	15	88.2986	rs13482695	14.6754	0.152
1420042_at	Thoc1	18	9.99552	X	69.2812	DXMit1	14.3877	0.153
1425834_a_at	Gpam	19	55.1443	16	12.3864	rs4162800	15.0103	0.153
1431326_a_at	Tmod2	9	75.4245	11	58.0605	rs13481045	15.4576	0.153
1460739_at	D11Bwg0280e	11	6.30572	13	54.8887	rs13481817	14.7955	0.153
1419872_at	Csf1r	18	61.2906	5	132.412	D5Mit372	14.3748	0.154
1433746_at	Wdr3	3	99.9421	15	87.9268	rs3707587	13.1224	0.154
1438988_x_at	Hn1	11	19.7614	17	83.3066	rs6263123	14.792	0.154
1419964_s_at	Hdgf	3	87.7197	12	113.706	rs4229611	15.4481	0.155
1434011_a_at	Ints5	19	8.97227	11	22.9284	rs6283329	14.764	0.155
1424139_at	Rap1a	3	105.531	19	44.2447	rs13483639	13.3215	0.156
1416790_a_at	Tdg	10	82.1129	6	95.039	rs13478906	14.6742	0.157
1417605_s_at	Camk1	6	113.284	4	108.705	gnf04.104.549	13.6989	0.157
1418024_at	Narg1	3	51.2625	11	58.0605	rs13481045	15.1394	0.157
1438176_x_at	1110031B06Rik	11	59.2207	5	126.432	rs3711495	15.9083	0.157
1438983_x_at	AI413782	12	88.5798	16	12.3864	rs4162800	14.3401	0.157
1433469_at	Lrrn2	1	134.836	13	54.8887	rs13481817	15.6378	0.158
1456767_at	Lrfn3	7	31.1406	7	45.4563	rs13479226	13.768	0.158
1457671_at	9330120H11Rik	7	88.7457	6	95.039	rs13478906	14.3418	0.158
1415712_at	Zranb1	7	140.176	12	113.706	rs4229611	15.2971	0.159
1419743_s_at	Carm1	9	21.3933	13	54.8887	rs13481817	15.2412	0.159
1435574_at	Chordc1	9	18.1214	6	95.039	rs13478906	14.6233	0.16
1426692_at	Ccdc97	7	26.4965	13	54.8887	rs13481817	14.9543	0.161
1443856_at	Rabep1	11	70.756	18	73.9701	rs13483437	14.1756	0.161
1454034_a_at	Usp21	1	173.212	13	52.7833	rs6209128	14.8445	0.161
1454831_at	Sgcz	8	38.841	13	20.4452	rs3676630	14.1346	0.161
1427670_a_at	Tcf12	9	71.6922	6	95.039	rs13478906	14.0413	0.162
1431191_a_at	Syt1	10	108.021	19	38.9008	rs6185741	15.3931	0.162
1458874_at	D9Ertd115e	9	16.016	16	26.9781	rs4165503	14.9609	0.162
1421027_a_at	Mef2c	13	83.8024	11	58.0605	rs13481045	14.1011	0.163
1436077_a_at	Fcho1	8	74.2326	13	54.8887	rs13481817	14.6526	0.163
1436894_at	5330438I03Rik	1	168.242	4	49.7924	rs13477695	14.5317	0.163
1442565_at	Pcdh10	3	45.2381	1	79.6852	D1Mit216	13.8337	0.163
1447831_s_at	Mtmr7	8	41.6365	2	30.263	rs13476408	13.6121	0.163
1455788_x_at	Poldip3	15	82.9564	6	95.039	rs13478906	14.3471	0.163
1426810_at	Jmjd1a	6	71.5392	18	75.8093	rs13483443	15.2372	0.164
1428195_at	4631427C17Rik	6	29.8532	16	67.8069	rs3695481	14.6692	0.164
1427742_a_at	Klf6	13	5.86426	1	79.6852	D1Mit216	15.2639	0.165
1456800_a_at	D130029J02Rik	8	108.221	15	88.2986	rs13482695	14.3823	0.165
1416065_a_at	Ankrd10	8	11.6116	11	4.40873	rs3659787	14.5093	0.166
1416732_at	Top2b	14	17.2491	16	67.8069	rs3695481	15.2615	0.166
1420816_at	Ywhag	5	136.387	16	12.3864	rs4162800	15.1677	0.166
1422685_at	Exoc4	6	33.9239	X	69.2812	DXMit1	13.441	0.166
1455955_s_at	Snx17	5	31.5011	16	12.3864	rs4162800	14.7943	0.166
1415849_s_at	Stmn1	4	134.029	18	11.0848	rs4231742	12.6025	0.167
1434909_at	C030003H22Rik	4	33.1086	2	26.6999	mCV23574676	14.7674	0.167
1416857_at	Sdf2	11	78.0687	16	12.3864	rs4162800	13.935	0.168
1429107_at	Zfp650	2	69.8597	16	67.8069	rs3695481	14.5001	0.168
1435190_at	Chl1	6	103.682	15	88.2986	rs13482695	13.8172	0.168
1443337_at	Grip1	10	118.961	4	44.3385	gnf04.041.337	14.6168	0.168
1443603_at	A030012M09Rik	1	7.14836	16	26.9781	rs4165503	14.2005	0.168
1418656_at	Lsm5	6	56.6511	18	70.9106	gnf18.069.064	14.0842	0.169
1421152_a_at	Gnao1	8	96.4925	15	88.2986	rs13482695	15.4197	0.169
1438839_a_at	Ywhae	11	75.5787	6	95.039	rs13478906	14.0222	0.169
1440551_at	Dnajc1	2	18.2848	X	156.93	gnfX.141.820	15.1852	0.169
1452952_at	9030418K01Rik	2	178.159	16	12.3864	rs4162800	14.5646	0.169
1455701_at	Snx26	7	31.3073	13	54.8887	rs13481817	15.5047	0.169
1417190_at	Pbef1	12	33.5354	6	95.039	rs13478906	14.3414	0.17
1428196_a_at	1200015F23Rik	2	118.963	5	126.432	rs3711495	15.1759	0.17
1416845_at	Hspa5bp1	19	10.9325	15	88.2986	rs13482695	13.5805	0.171
1420839_at	Plekha3	2	76.5308	11	22.9284	rs6283329	13.7212	0.171
1445539_at	Pde7b	10	20.1169	16	12.3864	rs4162800	15.7887	0.171
1417451_a_at	Ppia	11	6.31826	3	154.259	rs3716135	12.8851	0.172
1423859_a_at	Ptgds	2	25.3228	6	92.586	rs6223362	14.5431	0.172
1434706_at	Vcpip1	1	9.71334	2	26.6999	mCV23574676	14.687	0.172
1435368_a_at	Parp1	1	182.531	2	30.263	rs13476408	14.2393	0.172
1437382_at	Acvr2	2	48.7583	5	132.412	D5Mit372	14.8142	0.172
1437524_x_at	Coro7	16	4.62689	2	26.1904	rs3681655	15.3242	0.172
1451242_a_at	Ppp5c	7	17.5902	11	79.3634	rs13481119	14.2079	0.172
1434146_at	Gria2	3	80.49	7	113.857	rs3657482	15.1488	0.173
1439557_s_at	Ldb2	5	44.8635	13	52.7833	rs6209128	15.3033	0.173
1420965_a_at	Enc1	13	98.0228	7	114.49	rs13479470	14.5861	0.174
1437503_a_at	Scotin	9	108.96	16	12.3864	rs4162800	14.6591	0.174
1415833_x_at	Rps29	12	70.2588	6	92.586	rs6223362	14.002	0.175
1450082_s_at	Etv5	16	22.3825	10	108.783	rs13480759	13.1012	0.175
1452169_a_at	Dgkz	2	91.773	16	12.3864	rs4162800	14.1629	0.175
1423642_at	Tubb2c	2	25.078	15	88.2986	rs13482695	14.2135	0.176
1427456_at	Wdfy3	5	102.264	16	67.8069	rs3695481	13.338	0.176
1448853_at	Synj2bp	12	82.6018	16	12.3864	rs4162800	14.2577	0.176
1437400_at	Nedd4l	18	65.3757	12	113.706	rs4229611	14.4765	0.177
1456395_at	Ppargc1a	5	51.8482	6	95.039	rs13478906	14.9951	0.177
1460186_at	Smbp	19	41.289	10	123.018	rs6282839	14.0367	0.177
1427442_a_at	App	16	84.955	3	154.259	rs3716135	13.1401	0.178
1431083_a_at	1810014B01Rik	10	86.1522	6	105.778	rs13478951	14.6644	0.178
1433556_at	Centa1	5	139.748	7	15.6199	rs6295100	13.8765	0.178
1441331_at	A230061C15Rik	10	13.6998	4	44.3385	gnf04.041.337	15.5421	0.178
1434461_at	Znf175	7	50.5519	5	132.412	D5Mit372	14.6247	0.179
1416270_at	Polr2g	19	8.86769	13	71.4696	rs13481870	13.5996	0.18
1419313_at	Ccnt1	15	98.3737	8	72.7366	rs13460430	14.3375	0.18
1425524_at	2600011C06Rik	12	85.0037	X	159.857	rs3657281	14.2905	0.18
1450519_a_at	Prkaca	8	86.5197	15	88.2986	rs13482695	14.2026	0.18
1460593_at	E430021N18Rik	1	184.826	7	24.6467	rs13479153	14.8569	0.18
1441870_s_at	Pkd2	5	104.935	4	31.8934	rs6177140	14.0889	0.181
1448428_at	Nbl1	4	138.638	15	88.2986	rs13482695	15.0532	0.181
1449934_at	Pura	18	36.4474	9	123.812	rs8254393	14.1959	0.181
1420977_at	Man1a2	3	100.369	6	77.4513	rs3663024	14.0172	0.182
1447776_x_at	Rab6	7	107.789	7	114.49	rs13479470	14.3218	0.182
1417999_at	Itm2b	14	73.7621	17	83.3066	rs6263123	14.7986	0.183
1423567_a_at	Psma7	2	179.772	7	15.6199	rs6295100	15.3581	0.183
1420999_at	Cnot4	6	34.9961	16	67.8069	rs3695481	14.8184	0.184
1434589_x_at	Surf4	2	26.7756	X	69.2812	DXMit1	15.2223	0.184
1438991_x_at	Ppp2r1a	17	21.1028	3	154.259	rs3716135	14.5309	0.184
1416588_at	Ptprn	1	75.2438	7	24.6467	rs13479153	14.1302	0.185
1436809_a_at	Spin	13	51.2478	9	69.7615	rs6355445	13.3237	0.185
1438902_a_at	Hspca	12	111.929	7	114.49	rs13479470	14.5394	0.185
1454640_at	Chchd7	4	3.86616	11	79.0684	rs13481117	14.084	0.185
1420817_at	Ywhag	5	136.385	9	65.2632	rs3655717	13.4713	0.186
1436761_s_at	1200015N20Rik	10	70.0213	7	113.857	rs3657482	13.7249	0.186
1430136_at	Grm3	5	9.48534	7	30.1445	rs8261944	14.3918	0.187
1439215_at	Atp2c1	9	105.372	10	71.3533	CEL-10_71736974	14.5619	0.187
1420937_at	Cpsf2	12	103.239	11	58.0605	rs13481045	14.6451	0.188
1437456_x_at	Ythdf1	2	180.639	6	95.039	rs13478906	14.0861	0.188
1455826_a_at	Bace1	9	45.6702	7	18.8563	D7Mit57	13.3989	0.188
1418575_at	Shfdg1	6	6.50834	19	44.2447	rs13483639	13.9832	0.189
1420923_at	Usp9x	X	12.6917	16	67.8069	rs3695481	15.4296	0.189
1416500_at	Sacm1l	9	123.501	2	26.1904	rs3681655	13.7555	0.19
1428510_at	Lphn1	8	86.4653	7	30.1445	rs8261944	14.8777	0.19
1452694_at	Ihpk1	9	107.951	15	90.7567	rs3717268	14.0017	0.19
1416277_a_at	Rplp1	9	61.7612	6	92.586	rs6223362	14.7179	0.191
1416437_a_at	Mapk8ip3	17	25.0357	7	15.6199	rs6295100	14.4153	0.191
1422647_at	Ring1	17	34.1581	13	54.8887	rs13481817	15.0765	0.191
1423201_at	Ncor1	11	62.2045	11	58.0605	rs13481045	13.8335	0.191
1448907_at	Thop1	10	80.5441	7	15.6199	rs6295100	14.8042	0.191
1452806_at	1500016O10Rik	7	133.973	15	88.2986	rs13482695	13.336	0.191
1425777_at	Cacnb1	11	97.8632	7	34.4076	rs6239372	14.4894	0.192
1426465_at	Dlgap4	2	156.587	13	52.7833	rs6209128	15.1147	0.192
1438496_a_at	Ddx26b	X	53.7482	1	79.6852	D1Mit216	13.969	0.192
1450688_at	Rgl2	17	34.0742	6	104.807	rs13478947	14.551	0.192
1418835_at	Phlda1	10	110.945	13	54.8887	rs13481817	13.9912	0.193
1441064_at	E330039K12Rik	8	128.286	19	32.953	rs3672117	14.3577	0.193
1449929_at	Tcte1l	X	9.23142	7	15.6199	rs6295100	14.3307	0.193
1451234_at	BC021381	13	55.6408	13	54.8887	rs13481817	14.9171	0.193
1424134_at	Rspry1	8	97.1705	15	28.9905	rs3702361	14.4115	0.194
1454159_a_at	Igfbp2	1	72.8962	11	4.40873	rs3659787	13.7505	0.194
1417872_at	Fhl1	X	54.046	5	132.412	D5Mit372	13.5448	0.195
1424635_at	Eef1a1	9	17.5381	3	154.259	rs3716135	13.7345	0.195
1436076_at	Dlgap1	17	71.1702	18	73.9701	rs13483437	14.4639	0.195
1460169_a_at	Pctk1	X	20.2764	7	34.4076	rs6239372	14.468	0.195
1425805_a_at	Usp12	5	147.552	10	123.018	rs6282839	13.8558	0.196
1434476_at	Crtc1	8	72.9064	13	54.8887	rs13481817	14.4869	0.196
1441937_s_at	Pink1	4	137.869	18	70.9106	gnf18.069.064	14.7931	0.196
1416960_at	B3gat3	19	9.00078	15	88.2986	rs13482695	13.6569	0.197
1424283_at	Jtb	3	90.0393	16	67.8069	rs3695481	14.1662	0.197
1451872_a_at	Neurl	19	47.3322	7	15.6199	rs6295100	14.3577	0.197
1417632_at	Atp6v0a1	11	100.924	13	54.8887	rs13481817	14.9451	0.198
1428333_at	Spcs3	X	132.529	18	70.9106	gnf18.069.064	14.0914	0.198
1438678_at	1500011K16Rik	2	127.618	13	71.4696	rs13481870	14.2486	0.198
1450019_at	Cx3cr1	9	119.961	7	30.1445	rs8261944	14.049	0.198
1415702_a_at	Ctbp1	5	33.5905	13	54.8887	rs13481817	14.7542	0.199
1421870_at	Trim44	2	102.14	5	132.412	D5Mit372	14.2709	0.199
1426301_at	Alcam	16	52.2511	4	49.7924	rs13477695	14.5742	0.199
1419517_at	Cnih3	1	183.389	15	88.2986	rs13482695	13.9485	0.2
1451470_s_at	Eif5a	11	69.7303	19	11.1632	rs3700209	14.1549	0.2
1421137_a_at	Pkib	10	57.4564	16	67.8069	rs3695481	12.1237	0.201
1416453_x_at	Rps12	10	23.5057	6	92.586	rs6223362	14.7664	0.202
1418768_at	Opa1	16	29.652	16	63.7153	rs4151935	14.198	0.202
1423470_at	Ptbp2	3	119.422	2	26.6999	mCV23574676	14.2976	0.202
1437107_at	Rab6b	9	103.065	19	32.953	rs3672117	13.9163	0.202
1448809_at	Cse1l	2	166.771	6	77.4513	rs3663024	14.0992	0.202
1449173_at	Mpp2	11	101.918	13	54.8887	rs13481817	14.4588	0.202
1450982_at	Slc9a3r1	11	115.042	16	12.3864	rs4162800	14.5765	0.202
1451484_a_at	Syn1	X	20.4378	7	24.6467	rs13479153	14.4151	0.202
1451734_a_at	Dbn1	13	55.5765	16	12.3864	rs4162800	14.455	0.202
1456022_at	Hipk2	6	38.6416	11	58.0605	rs13481045	14.0562	0.202
1433712_at	AW555464	12	113.984	7	15.6199	rs6295100	14.7827	0.203
1435170_at	Tsr2	X	147.522	2	30.263	rs13476408	13.9993	0.203
1424823_s_at	Slain1	14	104.102	15	88.2986	rs13482695	14.3338	0.204
1434688_x_at	Drg1	11	3.14993	16	12.3864	rs4162800	14.3346	0.205
1427896_at	2400003N08Rik	5	117.542	14	118.847	rs6265743	14.2419	0.206
1436846_x_at	Ywhaq	12	21.3966	7	114.49	rs13479470	14.3135	0.206
1450143_at	Rasgrp1	2	117.108	19	38.9008	rs6185741	14.3107	0.206
1455286_at	Btbd1	7	88.937	7	34.4076	rs6239372	13.9233	0.206
1455880_s_at	Becn1	11	101.15	18	70.5928	rs13483427	14.1163	0.206
1459826_at	Kcnq2	2	180.813	14	88.3589	UT_9_81.82101	12.9286	0.207
1417890_at	Pdxp	15	78.7494	13	54.8887	rs13481817	14.8288	0.208
1423783_at	Tor2a	2	32.6172	15	88.2986	rs13482695	14.3839	0.208
1435780_at	Psd	19	46.3867	13	54.8887	rs13481817	14.7014	0.208
1434271_at	Gba2	4	43.5799	13	54.8887	rs13481817	14.7697	0.209
1435809_at	Ankrd34	3	96.4032	13	54.8887	rs13481817	14.1881	0.209
1437853_x_at	Ndn	7	69.4947	1	128.996	rs6263067	13.5104	0.209
1438739_at	Cnbp1	6	87.7979	4	49.7924	rs13477695	13.996	0.209
1442025_a_at	AI467657	9	48.4599	7	34.4076	rs6239372	14.5464	0.209
1457248_x_at	Hsd17b7	1	171.88	6	77.4513	rs3663024	14.5164	0.209
1418053_at	Sncb	13	54.8605	13	54.8887	rs13481817	14.363	0.21
1420387_at	Mpv17	5	31.4438	18	70.9106	gnf18.069.064	14.7201	0.21
1424935_at	Gdap1l1	2	163.279	15	87.3043	rs6405854	14.0636	0.21
1437705_at	1110020G09Rik	7	13.0008	7	30.1445	rs8261944	12.8702	0.21
1448102_a_at	Wdr61	9	54.5651	16	12.3864	rs4162800	14.1093	0.21
1449942_a_at	Ilk	7	112.891	7	30.1445	rs8261944	13.8624	0.21
1458385_at	Hspa4l	3	40.5951	1	23.0993	rs6316488	14.2964	0.21
1417947_at	Pcna	2	132.076	13	71.4696	rs13481870	14.2189	0.211
1449615_s_at	Hdlbp	1	95.3276	19	32.953	rs3672117	14.4087	0.211
1452430_s_at	Sfrs1	11	87.8631	10	123.018	rs6282839	12.5905	0.211
1419812_s_at	D11Ertd99e	11	101.139	13	73.4349	rs13481874	13.6346	0.212
1426954_at	Trim33	3	103.159	5	132.412	D5Mit372	14.2465	0.212
1431046_at	2410127E16Rik	7	52.5945	6	95.039	rs13478906	14.0119	0.212
1438000_x_at	Zfp622	15	25.9271	16	12.3864	rs4162800	13.1661	0.212
1458534_at	Rgs7bp	13	105.738	19	44.2447	rs13483639	14.2272	0.212
1435495_at	Adora1	1	136.096	15	88.2986	rs13482695	14.6726	0.213
1446953_at	Tcf4	18	69.785	15	88.2986	rs13482695	14.2417	0.213
1456262_at	Rbm5	9	107.662	7	30.1445	rs8261944	13.9577	0.213
1438653_x_at	Sca10	15	85.2936	15	28.9905	rs3702361	13.0657	0.214
1441155_at	2810446P07Rik	13	84.4185	18	73.9701	rs13483437	13.5085	0.214
1460192_at	Osbpl1a	18	12.9139	17	83.3066	rs6263123	14.3593	0.214
1418468_at	Anxa11	14	26.7057	7	30.1445	rs8261944	14.4023	0.215
1427294_a_at	1810073N04Rik	11	119.966	7	15.6199	rs6295100	14.4099	0.215
1449245_at	Grin2c	11	115.111	7	35.0486	rs13479188	13.6732	0.215
1417463_a_at	2400001E08Rik	7	109.06	9	34.3263	rs6258765	12.5021	0.216
1420402_at	Atp2b2	6	113.698	5	126.432	rs3711495	14.0319	0.216
1423104_at	Irs1	1	82.2298	2	26.1904	rs3681655	14.3166	0.216
1423956_at	Smap1	1	23.8526	11	8.73673	rs3714397	13.9902	0.216
1429634_at	Zfp580	7	5.00473	9	69.7615	rs6355445	14.2685	0.216
1443822_s_at	D10Ertd214e	10	70.7933	19	44.2447	rs13483639	14.3813	0.216
1446538_at	Kpna3	14	62.0248	16	26.9781	rs4165503	14.1503	0.216
1454826_at	Zbtb11	16	56.0085	2	30.263	rs13476408	13.8889	0.216
1428158_at	Akt1s1	7	52.1102	7	24.6467	rs13479153	14.7008	0.217
1431530_a_at	Tspan5	3	138.557	16	12.3864	rs4162800	14.3781	0.217
1436094_at	Vgf	5	137.509	7	15.6199	rs6295100	14.8549	0.217
1438951_x_at	Nup54	5	92.8446	X	69.2812	DXMit1	13.646	0.217
1440728_at	Kcnma1	14	24.2506	16	26.9781	rs4165503	13.8667	0.218
1456384_at	Nlgn3	X	98.5161	16	12.3864	rs4162800	14.3243	0.218
1439892_at	Brsk1	7	4.66737	15	88.2986	rs13482695	13.8294	0.219
1417960_at	Cpeb1	7	88.4927	9	34.3263	rs6258765	12.7718	0.22
1455369_at	Apba1	19	24.0235	13	54.8887	rs13481817	14.2801	0.22
1418177_at	Gabrg2	11	41.7257	13	54.8887	rs13481817	14.6839	0.221
1428931_a_at	3110038K10Rik	9	59.4973	15	88.2986	rs13482695	14.3315	0.221
1451383_a_at	Chuk	19	44.1564	13	22.4064	rs13481728	14.3115	0.221
1455901_at	Chpt1	10	87.9364	13	20.4452	rs3676630	13.2703	0.221
1418562_at	Sf3b1	1	55.0602	7	30.1445	rs8261944	14.553	0.222
1422665_a_at	Pcmt1	10	7.34919	2	30.263	rs13476408	14.3316	0.223
1418764_a_at	Bpnt1	1	187.178	11	4.40873	rs3659787	14.2922	0.224
1426024_a_at	Dbn1	13	55.5754	7	34.4076	rs6239372	14.2527	0.224
1429431_at	Zfpn1a5	7	138.533	11	4.40873	rs3659787	13.8827	0.224
1419248_at	Rgs2	1	145.848	6	138.401	rs3682699	13.7412	0.225
1434238_at	Taf2	15	54.847	9	123.812	rs8254393	13.923	0.225
1435453_at	A930011O12Rik	14	65.2122	13	54.8887	rs13481817	14.1858	0.225
1449633_s_at	C330027I04Rik	11	100.291	18	70.5928	rs13483427	14.7462	0.225
1436766_at	Luc7l2	6	38.519	4	44.3385	gnf04.041.337	13.7784	0.227
1439180_at	A430093A21Rik	1	63.1004	11	58.0605	rs13481045	13.5379	0.228
1443843_x_at	Rpl9	5	65.7796	10	30.6956	rs13480570	13.821	0.228
1420533_at	Gucy1a3	3	81.8986	19	44.2447	rs13483639	13.6502	0.229
1454926_at	Skip	1	83.2521	2	26.1904	rs3681655	13.3491	0.229
1456016_x_at	BC005624	2	30.8284	18	70.9106	gnf18.069.064	14.1975	0.229
1427058_at	Eif4a1	11	69.481	13	22.4064	rs13481728	13.184	0.23
1428392_at	Rassf2	2	131.819	9	65.2632	rs3655717	13.744	0.23
1435668_at	Ppcc1	17	15.57	6	64.7458	rs13478800	12.1881	0.23
1449448_at	Med9	11	59.7741	15	88.2986	rs13482695	12.0959	0.23
1425562_s_at	Trnt1	6	106.732	18	73.9701	rs13483437	13.8917	0.231
1445713_at	9630041G16Rik	4	56.9711	11	4.40873	rs3659787	13.9373	0.231
1431381_at	3110005L24Rik	9	50.4695	7	30.1445	rs8261944	13.4603	0.232
1431746_a_at	Ube1c	6	97.1323	13	54.8887	rs13481817	13.6023	0.232
1435862_at	Son	16	91.6788	15	79.5	rs4230869	14.2408	0.232
1451097_at	Vasp	7	19.8425	5	132.412	D5Mit372	14.2353	0.232
1416180_a_at	Rdx	9	51.8739	1	79.6852	D1Mit216	13.372	0.233
1422307_at	Usmg3	5	115.548	16	12.3864	rs4162800	13.7176	0.233
1423916_s_at	Mlf2	6	124.886	7	30.1445	rs8261944	13.4757	0.233
1429488_at	Zdhhc21	4	82.4486	7	30.1445	rs8261944	13.7415	0.233
1439031_at	Jph4	14	55.7259	7	34.4076	rs6239372	14.2039	0.233
1440545_at	Grm1	10	10.4059	13	52.7833	rs6209128	14.1573	0.233
1440825_s_at	1700009P13Rik	10	17.9335	16	12.3864	rs4162800	13.7285	0.233
1448916_at	Mafg	11	120.49	15	45.1075	rs13482547	13.887	0.233
1452009_at	1810054D07Rik	4	82.8666	2	26.6999	mCV23574676	14.3188	0.233
1453313_at	Sesn3	9	14.1301	11	58.0605	rs13481045	13.7354	0.233
1426897_at	Rcc2	4	140.279	5	127.857	rs3663155	14.1566	0.234
1452653_at	Slc25a22	7	148.616	15	88.2986	rs13482695	13.8085	0.234
1421568_at	Kcna6	6	126.688	11	75.2856	gnf11.079.978	13.6522	0.235
1425187_at	Sel1h	12	93.0471	8	7.70105	CEL-8_7689226	13.4692	0.235
1416337_at	Uqcrb	13	67.0023	18	70.9106	gnf18.069.064	13.7251	0.236
1426980_s_at	E130012A19Rik	11	97.489	7	15.6199	rs6295100	13.8952	0.236
1438671_at	Ppp2r2c	5	37.3453	15	88.2986	rs13482695	13.9917	0.236
1449459_s_at	Asb13	13	3.65072	7	114.49	rs13479470	13.5023	0.236
1451200_at	Kif1b	4	148.551	18	70.9106	gnf18.069.064	13.6189	0.236
1415922_s_at	Mlp	4	129.193	9	69.7615	rs6355445	13.8026	0.237
1419489_at	Fam19a5	15	87.5892	13	54.8887	rs13481817	14.4043	0.237
1435964_a_at	Taok3	5	117.724	X	69.2812	DXMit1	13.609	0.237
1448108_at	Tde2	10	57.2358	7	114.49	rs13479470	14.1178	0.237
1458406_at	Trerf1	17	47.4981	6	104.807	rs13478947	13.0955	0.237
1460365_a_at	Dnm1	2	32.164	7	15.6199	rs6295100	13.6697	0.237
1460446_at	Wrb	16	96.3789	7	15.6199	rs6295100	12.4396	0.237
1417535_at	Fbxo25	8	13.94	5	132.412	D5Mit372	13.8933	0.238
1424993_at	Kiaa1826	9	4.38631	9	123.812	rs8254393	13.5872	0.238
1450212_at	Fmnl1	11	103.058	7	34.4076	rs6239372	13.5932	0.238
1416883_at	Clptm1	7	20.2187	7	15.6199	rs6295100	13.4955	0.239
1423846_x_at	Tuba2	15	98.7619	3	154.259	rs3716135	12.895	0.239
1429764_at	1500005K14Rik	11	75.8353	11	58.0605	rs13481045	13.5503	0.239
1433572_a_at	Fam120a	13	48.9746	9	69.7615	rs6355445	14.2793	0.239
1434902_at	Rnf157	11	116.2	7	15.6199	rs6295100	13.9628	0.239
1438360_x_at	Slc25a5	X	34.3386	18	70.9106	gnf18.069.064	13.5301	0.239
1423870_at	Aida	8	4.08936	2	30.263	rs13476408	14.2982	0.24
1447903_x_at	Ap1s2	X	160.371	13	54.8887	rs13481817	13.8777	0.24
1449576_at	Eif1ay	X	155.825	10	123.018	rs6282839	13.6393	0.24
1452297_at	Ccnt2	1	129.703	16	67.8069	rs3695481	13.9467	0.24
1418181_at	Ptp4a3	15	73.5858	15	88.2986	rs13482695	14.3069	0.241
1424707_at	Tmed10	12	86.6816	15	28.443	rs13482498	14.1704	0.241
1435614_s_at	Rasgrf1	9	89.9217	2	26.1904	rs3681655	13.4438	0.241
1439460_a_at	Zfp289	2	91.117	16	12.3864	rs4162800	13.3286	0.241
1415708_at	Tug1	11	3.54007	2	26.6999	mCV23574676	13.256	0.242
1416792_at	Ppm1g	5	31.5051	15	45.1075	rs13482547	13.2394	0.242
1435638_at	Gsk3a	7	26.0133	7	34.4076	rs6239372	14.2486	0.242
1435664_at	Zfp397	18	24.1226	13	54.8887	rs13481817	13.7748	0.243
1451175_at	Spcs3	8	55.606	6	95.039	rs13478906	13.9841	0.243
1427978_at	4732418C07Rik	4	115.435	11	58.0605	rs13481045	13.2191	0.244
1435440_at	Pdzk8	19	59.3717	5	132.412	D5Mit372	13.0452	0.244
1436381_at	Dlgap3	4	126.914	15	88.2986	rs13482695	13.8512	0.244
1455463_at	Phyhip	14	70.8681	13	54.8887	rs13481817	14.4894	0.244
1417084_at	Eif4ebp2	10	60.8953	11	58.0605	rs13481045	13.2957	0.245
1429505_at	2310076G13Rik	1	60.3937	7	30.1445	rs8261944	13.3258	0.245
1450350_a_at	Jundm2	12	86.9803	16	67.8069	rs3695481	13.0327	0.246
1417080_a_at	Sitpec	9	21.8768	15	88.2986	rs13482695	13.5078	0.247
1448492_a_at	Psmd12	11	107.357	17	52.1796	CEL-17_50896182	13.6233	0.247
1450713_at	Cspg5	9	110.159	15	88.2986	rs13482695	13.6596	0.247
1424197_s_at	Fance	17	28.4551	4	62.1936	rs3690581	12.6873	0.248
1429487_at	Ppp1r12a	10	107.689	7	30.1445	rs8261944	13.097	0.248
1433991_x_at	Dbi	1	122.01	18	70.5928	rs13483427	13.5251	0.248
1455143_at	Nlgn2	11	69.6367	6	95.039	rs13478906	14.0449	0.248
1429269_at	FLJ22184	8	4.20984	7	34.4076	rs6239372	13.7151	0.249
1434256_s_at	Cds2	2	132.133	19	38.9008	rs6185741	13.9349	0.249
1439148_a_at	Pfkl	10	77.4509	15	88.2986	rs13482695	13.3757	0.249
1455875_x_at	Tm9sf2	14	122.558	15	28.9905	rs3702361	13.3283	0.249
1456272_at	2900045N06Rik	6	113.047	X	156.93	gnfX.141.820	13.8693	0.249
1418467_at	Smarcd3	5	24.0985	13	52.7833	rs6209128	13.57	0.25
1424167_a_at	Pmm1	15	81.7818	15	88.2986	rs13482695	13.3944	0.25
1436889_at	Gabra1	11	41.9452	7	114.49	rs13479470	12.9032	0.25
1438169_a_at	Frmd4b	6	97.2369	6	95.039	rs13478906	13.1552	0.25
1451015_at	Tkt	14	31.3841	11	79.3634	rs13481119	13.2835	0.25
1422704_at	Gyk	X	82.948	X	69.2812	DXMit1	12.9205	0.251
1437490_x_at	Uap1	1	172.072	X	69.2812	DXMit1	13.2684	0.251
1438318_x_at	1500001L15Rik	14	55.6422	14	78.4157	rs6352085	11.6562	0.251
1420833_at	Vamp2	11	68.9027	16	12.3864	rs4162800	14.2371	0.252
1427190_at	Appl1	14	27.7368	6	95.039	rs13478906	13.8052	0.252
1450845_a_at	Bzw1	1	58.4622	16	63.7153	rs4151935	13.8856	0.252
1417010_at	Zfp238	1	179.38	14	119.493	rs3691815	12.9373	0.253
1416657_at	Akt1	12	113.892	13	54.8887	rs13481817	13.8349	0.254
1418141_at	Dcx	X	140.292	7	30.1445	rs8261944	12.7616	0.254
1443422_at	2410089E03Rik	8	7.04138	4	44.3385	gnf04.041.337	14.121	0.254
1416134_at	Aplp1	7	31.2203	15	88.2986	rs13482695	13.4058	0.256
1418611_at	Grca	6	124.808	9	69.7615	rs6355445	12.8174	0.256
1419736_a_at	Eif1ay	X	155.818	9	71.2818	rs13459110	13.673	0.256
1426710_at	Calm3	7	17.5011	6	124.022	gnf06.122.747	12.25	0.256
1433550_at	Chfr	5	110.6	2	26.6999	mCV23574676	11.8751	0.256
1437690_x_at	Csnk1d	11	120.823	2	26.6999	mCV23574676	13.1238	0.256
1454693_at	4932408F19Rik	1	93.8257	15	28.443	rs13482498	13.792	0.256
1416086_at	Tpst2	5	112.744	11	79.3634	rs13481119	13.6166	0.257
1436893_a_at	2011-03-07	2	60.0748	7	26.7766	rs13479163	13.5885	0.257
1460168_at	Slbp	5	143.861	15	95.7777	rs13482726	13.1867	0.257
1424398_at	Dhx36	3	62.2994	11	58.0605	rs13481045	13.2968	0.258
1450097_s_at	Gna12	5	141.235	15	88.2986	rs13482695	13.2584	0.258
1450147_at	Nptxr	15	79.6193	16	12.3864	rs4162800	13.9864	0.258
1440037_at	Pbx1	1	170.355	4	44.3385	gnf04.041.337	13.883	0.259
1447919_x_at	Ndufab1	7	129.234	16	12.3864	rs4162800	13.4932	0.259
1426442_at	Gpm6a	8	56.1452	7	114.49	rs13479470	13.8291	0.26
1441317_x_at	Gababrbp	5	37.5164	6	64.7458	rs13478800	12.5635	0.26
1443170_at	Cnnm1	19	43.5711	13	54.8887	rs13481817	13.9982	0.26
1416922_a_at	Bnip3l	14	67.6064	17	83.3066	rs6263123	12.09	0.261
1421816_at	Gsr	8	34.7999	11	4.40873	rs3659787	12.4189	0.261
1422751_at	Tle1	4	71.7793	2	26.1904	rs3681655	13.2107	0.261
1424275_s_at	Trim41	11	48.62	2	30.263	rs13476408	13.6585	0.261
1435505_at	Dmwd	7	19.6677	15	88.2986	rs13482695	13.482	0.261
1423588_at	Arpc4	6	113.334	11	22.9284	rs6283329	13.4661	0.262
1429615_at	Zfp91	19	12.8416	16	19.7966	rs4165081	13.77	0.262
1437143_a_at	Txndc1	12	71.5685	16	12.3864	rs4162800	13.8436	0.262
1440156_s_at	LOC269389	2	163.15	4	31.8934	rs6177140	13.4292	0.262
1416038_at	Snd1	6	28.8382	15	28.443	rs13482498	13.6105	0.263
1437923_at	Csnk1a1	18	61.7458	X	156.93	gnfX.141.820	13.1241	0.263
1438657_x_at	Ptp4a1	1	30.9985	2	30.263	rs13476408	12.626	0.263
1456039_at	Snx14	9	88.2764	12	113.706	rs4229611	12.9577	0.263
1428087_at	Dnm1l	16	16.3136	16	63.7153	rs4151935	13.4838	0.264
1429131_at	Ube2v2	16	15.5529	11	22.9284	rs6283329	12.9929	0.264
1436167_at	LOC435684	2	122.175	11	79.3634	rs13481119	13.5933	0.264
1456037_x_at	Preb	5	31.2574	3	157.455	rs13477515	12.0377	0.265
1433778_at	Tnks	8	35.8896	16	63.7153	rs4151935	13.59	0.266
1434908_at	AI480556	7	52.2583	7	15.6199	rs6295100	13.5048	0.266
1445676_at	Kcnn2	18	45.8402	15	88.2986	rs13482695	12.9082	0.266
1450108_at	Kif1a	1	94.9129	7	15.6199	rs6295100	12.7594	0.266
1448479_at	Psmd3	11	98.5556	15	88.2986	rs13482695	12.0758	0.268
1448705_at	Zfp297	17	34.0558	15	45.1075	rs13482547	12.7983	0.268
1449069_at	Zfp148	16	33.4969	4	44.3385	gnf04.041.337	13.5939	0.268
1455594_at	Exoc3	13	74.3074	7	34.4076	rs6239372	13.2621	0.268
1416032_at	MGC5508	19	10.9455	13	52.7833	rs6209128	12.7362	0.269
1433802_at	Tmem151	19	5.08083	13	54.8887	rs13481817	13.4969	0.269
1443694_at	Rgs20	1	4.89972	12	115.998	rs6376011	13.9196	0.269
1455609_at	Cit	5	116.458	7	35.0486	rs13479188	14.0485	0.269
1436912_at	Cacnb4	2	52.2866	14	119.493	rs3691815	13.6946	0.27
1459214_at	Odz2	11	36.5992	4	44.3385	gnf04.041.337	12.7235	0.27
1459857_at	0610009O04Rik	11	84.8471	6	95.039	rs13478906	13.4665	0.27
1460432_a_at	Eif3s6	15	43.0926	6	95.039	rs13478906	13.3798	0.27
1425523_at	Rbm25	12	84.9853	11	58.0605	rs13481045	13.015	0.271
1427754_a_at	Dnm1	2	32.1645	13	54.8887	rs13481817	13.8112	0.271
1448695_at	Prkci	3	30.9438	3	3.77107	rs13476950	11.6502	0.271
1453063_at	Cltb	13	54.695	15	88.2986	rs13482695	12.9202	0.271
1417530_a_at	Srp9	1	184.061	5	123.549	rs13478499	13.5992	0.272
1435414_s_at	Dctn1	6	83.1499	12	114.377	CEL-12_108727612	13.2478	0.272
1436139_at	Mdga2	12	67.5671	15	79.5	rs4230869	13.9236	0.272
1423308_at	Tgoln1	6	72.5609	8	7.70105	CEL-8_7689226	12.9166	0.273
1427604_a_at	Atp9a	2	168.463	7	18.3679	rs3672220	13.9547	0.273
1433487_at	Clcn3	8	63.3908	10	123.018	rs6282839	11.7507	0.273
1443863_at	Fndc3a	14	72.9845	11	79.3634	rs13481119	12.7689	0.273
1437007_x_at	Usp39	6	72.2688	16	12.3864	rs4162800	12.9029	0.274
1437545_at	Rcor1	12	112.351	4	49.7924	rs13477695	13.2566	0.274
1438943_x_at	Rpn1	6	88.0537	6	95.039	rs13478906	13.1603	0.274
1450247_a_at	Scamp5	9	57.2915	16	12.3864	rs4162800	13.6165	0.274
1457142_at	Efcbp1	4	14.8824	19	38.9008	rs6185741	14.2019	0.274
1416496_at	Mrfap1	5	37.1864	6	95.039	rs13478906	13.8239	0.275
1420175_at	AI591476	6	52.7165	16	12.3864	rs4162800	12.7347	0.275
1436919_at	Tp53i11	2	93.0413	15	88.2986	rs13482695	13.6925	0.275
1434251_at	6030411K04Rik	8	98.2442	18	70.9106	gnf18.069.064	13.0334	0.276
1444288_at	Pnpt1	11	29.0464	1	15.4934	rs3678179	12.4572	0.276
1454641_at	Cggbp1	16	64.8587	2	26.6999	mCV23574676	13.7404	0.276
1456786_at	Ldb2	5	44.8638	7	34.4076	rs6239372	14.0505	0.276
1428429_at	Rgmb	17	15.9439	10	123.018	rs6282839	13.3882	0.277
1456036_x_at	Gsto1	19	47.9391	18	70.9106	gnf18.069.064	13.408	0.277
1422073_a_at	Celsr2	3	108.195	7	15.6199	rs6295100	12.9833	0.278
1423297_at	Add3	19	53.32	7	40.3789	rs6206014	12.8698	0.278
1438654_x_at	Mmd2	5	143.039	2	26.1904	rs3681655	12.8041	0.278
1447937_a_at	4933409K07Rik	4	41.757	19	38.9008	rs6185741	13.6452	0.278
1456056_a_at	Fam21a	6	116.213	2	26.6999	mCV23574676	12.8768	0.278
1422845_at	Canx	11	50.1093	9	73.3182	rs6167970	12.8463	0.279
1424236_at	Tbc1d10b	7	134.341	13	54.8887	rs13481817	13.0132	0.279
1427250_at	Atp2a2	5	122.906	18	73.9701	rs13483437	13.2417	0.279
1429146_at	6620401M08Rik	7	59.2526	16	12.3864	rs4162800	13.4994	0.279
1438500_at	B230206N24Rik	6	113.445	16	12.3864	rs4162800	12.8731	0.279
1442014_at	Ifrd1	12	40.9346	4	44.3385	gnf04.041.337	12.68	0.279
1460426_at	9430063L05Rik	3	97.5515	19	38.9008	rs6185741	13.2056	0.279
1417980_a_at	Insig2	1	123.201	16	12.3864	rs4162800	12.6872	0.28
1427688_a_at	Ptprs	17	56.563	16	12.3864	rs4162800	13.4282	0.28
1434108_at	Fbxo11	17	88.3905	7	114.49	rs13479470	12.8806	0.28
1436244_a_at	Tle2	10	81.0506	11	79.3634	rs13481119	13.133	0.28
1415818_at	Anxa6	11	54.7928	15	88.2986	rs13482695	13.1868	0.281
1434582_at	Erc2	14	29.2912	2	26.6999	mCV23574676	13.3352	0.281
1457800_at	Slc1a2	2	102.626	15	95.7777	rs13482726	13.2576	0.281
1425405_a_at	Adar	3	89.5536	X	67.7016	rs3157124	13.0719	0.282
1435807_at	Cdc42	4	136.878	16	12.3864	rs4162800	13.1049	0.282
1456144_at	Nav3	10	109.12	2	26.6999	mCV23574676	13.6357	0.282
1424945_at	Chrdl1	X	139.722	11	58.0605	rs13481045	13.3911	0.283
1438633_x_at	Lasp1	11	97.6999	16	12.3864	rs4162800	12.3311	0.283
1440488_at	Ptpn4	1	121.597	4	44.3385	gnf04.041.337	13.183	0.283
1424100_s_at	Bm88	7	148.613	13	54.8887	rs13481817	12.935	0.284
1425690_at	B3gat1	9	26.5668	16	12.3864	rs4162800	13.8037	0.284
1428074_at	Tmem158	9	123.168	17	54.827	rs3714819	12.2868	0.284
1436746_at	Prkwnk1	6	119.92	5	22.7227	gnf05.017.151	12.9643	0.284
1439971_at	C20orf12	2	144.296	2	30.263	rs13476408	13.2636	0.284
1415916_a_at	Mthfd1	12	77.4186	3	148.544	gnf03.152.088	13.3981	0.285
1423535_at	Strn3	12	52.7098	18	73.9701	rs13483437	13.4001	0.285
1427079_at	Mapre3	5	31.1678	15	88.2986	rs13482695	13.301	0.285
1435643_x_at	Ubb	11	62.3663	3	154.259	rs3716135	12.7041	0.286
1453286_at	Plxna2	1	196.64	4	49.7924	rs13477695	13.4297	0.286
1456699_s_at	Ythdc1	5	87.2655	X	69.2812	DXMit1	12.9811	0.286
1428055_at	Rian	12	110.893	16	26.9781	rs4165503	13.0422	0.287
1435769_at	Akap9	5	4.07794	2	26.6999	mCV23574676	13.4609	0.287
1452586_at	Anapc13	9	102.536	19	47.1974	rs13483649	13.24	0.287
1416491_at	Numbl	7	28.0666	7	15.6199	rs6295100	13.4935	0.288
1419946_s_at	Rab2	4	8.53428	3	157.455	rs13477515	12.9656	0.288
1423264_at	Bop1	15	76.2836	7	24.6467	rs13479153	12.9741	0.288
1428969_at	KIAA1012	18	20.976	12	113.706	rs4229611	12.6144	0.288
1437633_at	Ankrd11	8	125.42	11	58.0605	rs13481045	13.4456	0.288
1418819_at	Arl10c	6	108.772	11	20.8533	rs3023251	13.2374	0.289
1423362_at	Sort1	3	108.164	6	49.3681	rs3698072	13.2514	0.289
1435251_at	Snx13	12	35.8318	2	26.6999	mCV23574676	13.4613	0.289
1453860_s_at	Nr3c1	18	39.6466	19	38.9008	rs6185741	13.8467	0.289
1421160_a_at	Rfng	11	120.643	13	52.7833	rs6209128	12.8824	0.29
1426956_a_at	Trp53bp1	2	121.024	2	26.1904	rs3681655	12.8467	0.29
1451148_at	Pink1	4	137.869	15	88.2986	rs13482695	13.0129	0.29
1424177_at	Tmem38a	8	75.1106	15	88.2986	rs13482695	13.0078	0.291
1428070_at	Syvn1	19	6.05313	15	88.2986	rs13482695	13.3968	0.291
1433682_at	Arhgef17	7	108.021	13	54.8887	rs13481817	13.2769	0.291
1422442_at	Smu1	4	40.6842	6	95.039	rs13478906	13.0729	0.292
1433754_at	Mbnl2	14	120.83	2	26.1904	rs3681655	13.5471	0.292
1453367_a_at	Abhd12	2	150.664	15	88.2986	rs13482695	12.5373	0.292
1456419_at	5730455P16Rik	11	80.175	7	30.1445	rs8261944	12.088	0.292
1423734_at	Rac1	5	144.268	6	124.022	gnf06.122.747	12.7949	0.293
1430543_at	Clip3	7	31.0908	7	15.6199	rs6295100	13.2686	0.293
1422778_at	Taf9	13	101.425	15	28.443	rs13482498	13.6408	0.294
1447922_at	Stxbp5l	16	37.1132	4	44.3385	gnf04.041.337	13.4558	0.294
1451086_s_at	Rac1	5	144.267	9	69.7615	rs6355445	12.4902	0.294
1455437_at	KIAA0999	9	46.0318	12	114.377	CEL-12_108727612	13.2948	0.294
1423106_at	Ube2b	11	87.7594	7	15.6199	rs6295100	13.5397	0.295
1434937_at	Phr1	14	103.513	2	30.263	rs13476408	13.4648	0.295
1433468_at	Irf2bpl	12	88.2226	17	83.3066	rs6263123	13.0121	0.296
1434291_a_at	Serf1	13	100.884	19	47.1974	rs13483649	12.6848	0.296
1437483_at	Zfp513	5	31.5015	13	54.8887	rs13481817	13.091	0.296
1450913_at	B4galt6	18	20.8451	16	63.7153	rs4151935	13.3048	0.296
1416546_a_at	Rpl6	5	121.657	13	82.3323	rs3686754	12.7821	0.297
1420609_at	2011-03-07	2	60.0867	7	24.6467	rs13479153	13.8306	0.297
1435666_at	Mast3	8	73.3022	13	54.8887	rs13481817	13.2102	0.297
1447156_at	Chm	X	110.223	15	88.2986	rs13482695	12.9511	0.297
1455225_at	Syne1	10	5.00905	18	70.9106	gnf18.069.064	13.2707	0.297
1460678_at	Klhdc2	12	70.4082	18	70.5928	rs13483427	12.2588	0.297
1415949_at	Cpe	8	67.0714	7	114.49	rs13479470	13.4549	0.298
1423135_at	Thy1	9	43.8561	7	30.1445	rs8261944	13.6038	0.298
1456029_a_at	Ttc7b	12	101.539	7	15.6199	rs6295100	13.6789	0.298
1418007_at	1810007M14Rik	16	91.0153	5	132.412	D5Mit372	12.6706	0.299
1424109_a_at	Glo1	17	30.7311	6	124.022	gnf06.122.747	13.1646	0.299
1452788_at	Ppp2r5e	12	76.5676	4	142.637	rs6316136	12.5811	0.299
1416272_at	Map2k1ip1	3	137.591	16	12.3864	rs4162800	13.0286	0.3
1423740_a_at	Rbm10	X	20.2279	2	26.1904	rs3681655	12.8448	0.3
1456492_at	9130404D08Rik	8	72.5404	5	41.8195	rs3662682	12.8192	0.3
1419484_a_at	Gbas	5	130.264	3	157.075	gnf03.160.599	12.1718	0.302
1425679_a_at	Mapk8ip	2	92.2244	16	12.3864	rs4162800	13.788	0.302
1420403_at	Atp2b2	6	113.698	11	20.8533	rs3023251	12.4732	0.303
1426559_at	Sbno1	5	124.844	11	58.0605	rs13481045	13.127	0.303
1435230_at	Ankrd12	17	66.3169	2	26.6999	mCV23574676	13.3769	0.303
1416220_at	Spcs1	14	31.8131	16	34.2281	rs4171932	13.448	0.304
1418051_at	Ephb6	6	41.5697	7	15.6199	rs6295100	13.3551	0.304
1426227_s_at	5730409F24Rik	19	10.7886	13	52.7833	rs6209128	13.5232	0.304
1447096_at	Pbx1	1	170.327	15	79.5	rs4230869	13.1399	0.304
1448374_at	Med28	5	45.9176	13	54.8887	rs13481817	13.3895	0.304
1453386_at	Tusc1	4	93.001	11	79.3634	rs13481119	13.3542	0.304
1439263_at	Fin15	6	50.1523	18	70.5928	rs13483427	12.7849	0.305
1456516_x_at	Uap1	1	172.072	X	69.2812	DXMit1	12.321	0.305
1416219_at	Rpl19	11	97.8897	6	92.586	rs6223362	13.1127	0.306
1417865_at	Tnfaip1	11	78.3379	15	88.2986	rs13482695	13.1013	0.306
1421028_a_at	Mef2c	13	83.7951	7	30.1445	rs8261944	12.1104	0.306
1423188_a_at	C3orf10	6	113.567	19	38.9008	rs6185741	12.6529	0.306
1429040_at	Cdh11	8	19.6943	16	67.8069	rs3695481	13.6424	0.306
1436780_at	Ogt	X	98.8477	12	113.706	rs4229611	12.7777	0.306
1440681_at	Chrna7	7	70.2407	5	132.412	D5Mit372	13.3058	0.306
1443762_s_at	Mtmr13	7	117.452	11	79.3634	rs13481119	12.8983	0.306
1444478_at	Appl1	14	27.736	6	95.039	rs13478906	13.2082	0.306
1454632_at	6330442E10Rik	12	80.0632	2	26.1904	rs3681655	12.815	0.306
1428884_at	Tmem57	4	134.36	7	35.0486	rs13479188	13.6128	0.307
1452089_at	Cacnb4	2	52.2897	7	30.1445	rs8261944	12.1292	0.307
1454074_a_at	Rsrc2	5	124.179	X	69.2812	DXMit1	12.8823	0.307
1422453_at	Prpf8	11	75.3221	19	44.2447	rs13483639	13.4485	0.308
1422550_a_at	Mtap6	7	106.485	13	52.7833	rs6209128	13.2662	0.308
1424474_a_at	Camkk2	5	123.183	7	18.3679	rs3672220	10.416	0.308
1426791_at	Rusc2	4	43.4394	7	15.6199	rs6295100	12.7852	0.308
1426885_a_at	Cdk2ap1	5	124.796	2	81.907	rs3667007	12.5476	0.308
1449117_at	Jund1	8	73.224	13	54.8887	rs13481817	12.9244	0.308
1449515_at	Zfp292	4	34.7521	7	30.1445	rs8261944	12.8462	0.308
1450655_at	Pten	19	32.8966	18	70.9106	gnf18.069.064	13.4013	0.308
1423785_at	Egln1	8	127.433	5	127.857	rs3663155	12.8944	0.309
1429174_at	Wdr34	2	29.8872	6	95.039	rs13478906	11.7918	0.309
1451429_at	5730466C23Rik	8	108.24	15	88.2986	rs13482695	12.5862	0.309
1455129_at	Mtdh	15	34.0476	11	58.0605	rs13481045	13.35	0.309
1459861_s_at	Fbxl10	5	123.321	6	95.039	rs13478906	13.2925	0.309
1443728_at	9030605E16Rik	14	94.0349	5	39.9256	rs3703261	12.55	0.31
1455972_x_at	Hadhsc	3	130.936	7	34.4076	rs6239372	12.6641	0.31
1433706_a_at	Ptplad1	9	64.8349	7	36.4787	rs13479194	12.8659	0.311
1417499_at	Timm13a	2	84.6678	14	118.847	rs6265743	12.574	0.312
1422565_s_at	Nfic	10	80.8631	15	88.2986	rs13482695	12.0244	0.312
1448225_at	Gpaa1	15	76.1645	X	156.93	gnfX.141.820	13.0211	0.312
1450070_s_at	Pak1	7	105.06	6	64.7458	rs13478800	11.19	0.312
1420830_x_at	Ywhaq	12	21.3962	16	12.3864	rs4162800	13.2459	0.313
1425678_a_at	Snrk	9	122.077	13	52.7833	rs6209128	12.7401	0.313
1436759_x_at	Cnn3	3	121.161	14	96.5609	gnf14.093.344	12.3749	0.314
1438267_x_at	Rnps1	17	24.5627	10	28.1392	rs6391751	12.544	0.314
1453006_at	2610306H15Rik	19	36.9922	2	26.6999	mCV23574676	13.2945	0.314
1415812_at	Gsn	2	35.1599	15	45.1075	rs13482547	13.1163	0.315
1426219_at	Scp2	4	107.717	7	15.6199	rs6295100	12.4755	0.315
1426377_at	Zfp281	1	138.526	4	62.1936	rs3690581	12.5727	0.315
1428502_at	Actr6	10	89.1748	16	12.3864	rs4162800	12.8954	0.315
1436084_at	Scrt1	15	76.3467	7	15.6199	rs6295100	12.7933	0.315
1452742_at	Trak1	9	121.382	11	22.9284	rs6283329	12.8402	0.315
1455975_x_at	Zfp313	2	167.341	16	12.3864	rs4162800	13.0937	0.315
1434318_a_at	Tcfe3	X	7.3518	X	69.2812	DXMit1	12.574	0.316
1458134_at	Gstz1	12	88.494	11	58.0605	rs13481045	12.2506	0.316
1416659_at	Eif3s10	19	60.8371	2	26.6999	mCV23574676	13.1999	0.317
1450978_at	Dvl1	4	155.233	7	15.6199	rs6295100	13.1019	0.317
1456478_at	Pgm2l1	7	107.423	16	62.212	rs3693435	13.4147	0.317
1420441_at	Cenpc1	5	86.4424	2	33.272	rs13476419	12.6872	0.318
1421880_at	Mtmr1	X	68.6713	18	70.9106	gnf18.069.064	12.7806	0.318
1421897_at	Elk1	X	20.5115	15	88.2986	rs13482695	12.9754	0.318
1423697_at	Psmd6	14	14.9467	13	82.3323	rs3686754	13.303	0.318
1451312_at	Ndufs7	10	79.7164	13	71.4696	rs13481870	13.0096	0.318
1416727_a_at	Cyb5	18	85.0425	19	44.2447	rs13483639	13.0161	0.319
1419244_a_at	Rab14	2	35.0393	13	52.7833	rs6209128	12.9129	0.319
1427408_a_at	Thrap3	4	125.851	16	12.3864	rs4162800	13.3631	0.32
1431036_a_at	Tmed2	5	125	9	59.7854	rs6224703	11.8926	0.32
1415903_at	Slc38a1	15	96.4068	16	26.9781	rs4165503	11.8619	0.321
1415946_at	Pigq	17	26.0636	16	12.3864	rs4162800	13.3396	0.321
1427943_at	Acyp2	11	30.4062	18	70.9106	gnf18.069.064	13.3699	0.322
1434799_x_at	Aldoa	7	133.939	6	105.778	rs13478951	13.1909	0.322
1435519_at	Rap1b	10	117.252	6	104.807	rs13478947	12.3879	0.322
1420611_at	Prkacb	3	146.393	18	70.9106	gnf18.069.064	13.4377	0.323
1429211_at	2900078E11Rik	16	66.6559	X	69.2812	DXMit1	13.1475	0.323
1429454_at	Gapvd1	2	34.5325	6	95.039	rs13478906	13.6047	0.323
1433452_at	B630019K06Rik	X	8.47154	13	62.9702	rs13481845	12.8071	0.323
1452376_at	Zfp444	7	6.13975	13	62.9702	rs13481845	12.926	0.323
1457587_at	Kcnq5	1	21.3885	7	132.836	rs3716088	13.3405	0.323
1419545_a_at	Atp6v1c1	15	38.6218	7	114.49	rs13479470	13.0576	0.324
1423370_a_at	Csnk1g2	10	80.1026	13	52.7833	rs6209128	12.5218	0.324
1424253_at	1810073G14Rik	11	57.2966	7	40.3789	rs6206014	13.4972	0.324
1428344_at	Ppapdc2	19	29.0407	19	28.4693	D19Msw029	13.4305	0.324
1452291_at	Centd1	5	62.9938	18	73.9701	rs13483437	12.9019	0.324
1455138_x_at	Cfl1	19	5.49389	6	95.039	rs13478906	13.3856	0.324
1456736_x_at	Mff	1	82.7488	15	28.443	rs13482498	12.5773	0.324
1425497_a_at	Prpf4b	13	34.9911	16	67.8069	rs3695481	12.3642	0.325
1434709_at	Nrcam	12	45.6994	7	30.4293	rs8251849	13.1272	0.325
1454848_at	Ppp1r12c	7	4.43333	7	15.6199	rs6295100	12.6935	0.325
1456010_x_at	Hes5	4	154.336	4	104.787	rs13477919	12.5957	0.325
1422625_at	Ly6h	15	75.3954	15	88.2986	rs13482695	12.8651	0.326
1435210_s_at	Snph	2	151.417	13	54.8887	rs13481817	13.1513	0.326
1436498_at	Arih1	9	59.2383	16	63.7153	rs4151935	13.2485	0.326
1429425_at	Rnf139	15	58.7313	6	95.039	rs13478906	12.2562	0.327
1448179_at	Usmg5	19	47.158	11	79.3634	rs13481119	13.0192	0.327
1452666_a_at	Tmcc2	1	134.253	7	15.6199	rs6295100	12.8673	0.327
1434383_at	Pja2	17	64.6304	14	119.493	rs3691815	12.7392	0.328
1436750_a_at	Oxct1	15	4.10376	7	113.857	rs3657482	12.7823	0.328
1452773_at	5730494N06Rik	2	132.065	12	99.9811	rs13481611	13.4977	0.328
1415767_at	Ythdf1	2	180.64	7	34.4076	rs6239372	12.6257	0.329
1438078_at	C030040A22Rik	11	88.8966	7	30.1445	rs8261944	12.6727	0.329
1438922_x_at	Slc25a5	X	34.3386	18	70.5928	rs13483427	12.4199	0.329
1456043_at	Usp22	11	60.9666	4	103.139	rs13477881	12.4488	0.329
1425711_a_at	Akt1	12	113.893	13	52.7833	rs6209128	12.8242	0.33
1435304_at	Sod1	16	90.2249	11	19.6458	D11Mit79	12.9351	0.33
1451229_at	Hdac11	6	91.1241	6	95.039	rs13478906	12.7154	0.33
1456609_at	Camk2n1	4	138.013	3	154.259	rs3716135	12.5027	0.33
1426884_at	1110007A06Rik	6	71.3389	18	70.9106	gnf18.069.064	12.6509	0.331
1438263_at	9430020K01Rik	18	4.67359	14	78.4157	rs6352085	13.1345	0.331
1447720_x_at	Prkaca	8	86.5202	X	69.2812	DXMit1	13.2547	0.331
1417044_at	Lcmt1	7	130.565	11	79.0684	rs13481117	12.5105	0.332
1428495_at	2410003K15Rik	6	49.0251	17	52.1796	CEL-17_50896182	12.4854	0.332
1440817_x_at	G630024C07Rik	7	134.398	14	118.847	rs6265743	12.5188	0.332
1454971_x_at	Tgfb1i4	14	76.9074	17	83.3066	rs6263123	12.8473	0.332
1434676_at	Mtmr9	14	64.1395	2	26.6999	mCV23574676	12.6207	0.333
1435589_at	Ccdc85b	19	5.45663	15	45.1075	rs13482547	13.2396	0.333
1438635_x_at	B930041F14Rik	4	155.07	13	54.8887	rs13481817	13.0903	0.333
1440516_at	Slitrk4	X	61.5182	9	69.7615	rs6355445	12.726	0.334
1449110_at	Rhob	12	8.50489	7	34.4076	rs6239372	12.9245	0.334
1459746_at	R3hdm1	1	130.102	4	44.3385	gnf04.041.337	12.5898	0.334
1417712_at	Eif2s2	2	154.698	5	126.432	rs3711495	12.625	0.335
1437666_x_at	Ubc	5	125.866	17	83.3066	rs6263123	12.4224	0.335
1437729_at	Tnpo1	13	99.6743	X	69.2812	DXMit1	12.6653	0.335
1439410_x_at	D11Ertd333e	11	102.264	14	118.847	rs6265743	13.3841	0.335
1460498_a_at	Dnajc5	2	181.283	16	13.0559	rs4163042	13.1957	0.335
1426989_at	Clstn3	6	124.381	7	15.6199	rs6295100	13.0345	0.336
1452370_s_at	B230208H17Rik	2	25.4409	14	96.5609	gnf14.093.344	13.2743	0.336
1422609_at	Arpp19	9	74.9049	16	12.3864	rs4162800	12.5791	0.337
1436150_at	1700066J24Rik	4	41.4648	X	156.93	gnfX.141.820	12.851	0.337
1437177_at	Larp4	15	99.8433	11	58.0605	rs13481045	12.5776	0.337
1447143_at	D230046B21Rik	6	12.0132	4	44.3385	gnf04.041.337	11.3264	0.337
1448361_at	Ttc3	16	94.6903	18	75.8093	rs13483443	12.7899	0.337
1437634_at	6330441O12Rik	X	39.1486	16	67.8069	rs3695481	13.1927	0.338
1434267_at	Nek1	8	63.6096	2	26.1904	rs3681655	12.3093	0.339
1434707_at	Sbf1	15	89.1191	7	15.6199	rs6295100	12.3814	0.339
1445340_at	Phr1	14	103.641	15	88.2986	rs13482695	13.4379	0.339
1457255_x_at	Kif5c	2	49.5566	11	58.0605	rs13481045	12.416	0.339
1419289_a_at	Syngr1	15	79.9409	16	12.3864	rs4162800	12.8135	0.34
1426682_at	Cnot6	11	49.485	15	88.2986	rs13482695	12.5282	0.34
1433689_s_at	Rps9	7	3.65601	17	52.1796	CEL-17_50896182	12.4885	0.34
1449176_a_at	Dck	5	89.2117	2	139.416	rs13476805	12.223	0.34
1451888_a_at	Odz4	7	104.055	1	68.9351	rs6312657	12.7567	0.34
1429009_at	Snrp70	7	52.6367	11	79.0684	rs13481117	12.9179	0.341
1433951_at	Arl5	2	52.2536	2	26.6999	mCV23574676	12.4585	0.341
1437226_x_at	Mlp	4	129.193	13	54.8887	rs13481817	12.9613	0.341
1449505_at	Kpna1	16	36.0367	16	63.7153	rs4151935	12.2356	0.341
1450694_at	Fkbp2	19	7.05241	13	96.5572	rs13481955	12.7456	0.341
1417423_at	Grina	15	76.0798	7	24.6467	rs13479153	12.9497	0.342
1434879_at	Cdc34	10	79.1478	11	4.40873	rs3659787	13.0045	0.342
1439500_at	Scrn1	6	54.4559	6	77.4513	rs3663024	12.6584	0.342
1451846_at	Nebl	2	17.2688	15	95.7777	rs13482726	12.1361	0.342
1419027_s_at	Gltp	5	115.12	11	79.3634	rs13481119	12.7652	0.343
1423584_at	Igfbp7	5	77.7784	11	19.6458	D11Mit79	12.6603	0.343
1428868_a_at	Oaz1	10	80.2911	13	71.4696	rs13481870	12.4855	0.343
1460395_at	Nudcd3	11	6.00644	2	26.1904	rs3681655	12.8498	0.343
1417648_s_at	Snx5	2	144.076	15	28.443	rs13482498	12.4113	0.344
1423901_at	Trip12	1	84.7195	19	44.2447	rs13483639	12.9143	0.344
1437087_at	Lrrc8b	5	105.919	13	54.8887	rs13481817	12.6298	0.344
1432464_a_at	2310057J16Rik	8	3.60829	X	80.8499	rs13483868	12.8743	0.345
1450072_at	Ash1l	3	88.8827	9	123.812	rs8254393	12.9889	0.345
1418364_a_at	Ftl1	7	52.7135	1	20.619	rs3670611	12.8646	0.346
1421990_at	Syt1	10	107.937	19	38.9008	rs6185741	13.2283	0.346
1436767_at	Luc7l2	6	38.5184	15	88.2986	rs13482695	12.7083	0.346
1439424_x_at	Herpud2	9	24.9127	X	69.2812	DXMit1	12.6018	0.346
1455622_at	Podxl2	6	88.7928	15	88.2986	rs13482695	12.1794	0.346
1455886_at	Cbl	9	43.9575	11	58.0605	rs13481045	12.5339	0.346
1421950_at	Pfdn2	1	173.287	9	59.7854	rs6224703	11.7752	0.347
1455291_s_at	Znrf2	6	54.8431	9	62.1767	rs4227706	12.3366	0.347
1424040_at	Rprc1	4	125.91	7	18.3679	rs3672220	12.1999	0.348
1449003_a_at	Vti1b	12	80.2574	17	83.3066	rs6263123	12.5719	0.349
1434170_at	Wdr40b	X	42.1398	13	54.8887	rs13481817	12.7719	0.35
1447602_x_at	Sulf2	2	165.899	13	54.8887	rs13481817	13.359	0.35
1424071_s_at	KIAA0947	13	70.7276	2	26.6999	mCV23574676	12.7445	0.351
1426997_at	Thra	11	98.6259	13	54.8887	rs13481817	12.7121	0.351
1439432_x_at	Morf4l2	X	133.268	X	69.2812	DXMit1	12.5605	0.351
1455289_at	Ankrd13b	11	77.2842	19	28.4693	D19Msw029	12.8543	0.352
1433718_a_at	Cbx1	11	96.6691	7	114.49	rs13479470	12.5971	0.353
1434456_at	Rpib9	5	8.49037	2	26.6999	mCV23574676	12.5682	0.353
1436705_at	Tmem32	X	53.8388	2	30.263	rs13476408	12.5433	0.353
1452357_at	Gp1bb	16	18.6219	7	24.6467	rs13479153	13.3305	0.353
1421448_at	Garnl1	12	56.7416	19	38.9008	rs6185741	12.5942	0.354
1435067_at	B230208H17Rik	2	25.4385	15	88.2986	rs13482695	12.8951	0.354
1452164_at	BC038286	1	75.1439	7	24.6467	rs13479153	12.8695	0.354
1455057_at	Gmps	3	63.8231	11	58.0605	rs13481045	11.9566	0.354
1417202_s_at	Ube1c	6	97.1342	7	114.49	rs13479470	11.9053	0.355
1417977_at	Eif4e3	6	99.5752	13	54.8887	rs13481817	12.2364	0.355
1436584_at	Spry2	14	106.291	7	114.49	rs13479470	12.7142	0.355
1438371_x_at	Ddx5	11	106.643	7	115.203	mCV24779699	12.6272	0.355
1417685_at	Ankfy1	11	72.5841	5	133.347	rs13478539	11.663	0.356
1440936_at	D17Ertd141e	17	6.04069	5	132.412	D5Mit372	12.3985	0.357
1451110_at	Egln1	8	127.434	15	45.1075	rs13482547	12.7806	0.357
1455792_x_at	Ndn	7	69.4947	5	126.432	rs3711495	12.7767	0.357
1416048_at	Phc2	4	128.43	15	45.1075	rs13482547	12.6395	0.358
1416902_a_at	Cox5b	1	36.7484	11	4.40873	rs3659787	13.0915	0.358
1421123_at	Cdk5r1	11	80.2916	16	12.3864	rs4162800	12.2209	0.358
1423651_at	Isca1	13	21.5884	14	82.4487	rs13482276	11.9061	0.358
1427191_at	Npr2	4	43.6631	7	34.4076	rs6239372	12.0948	0.358
1435389_at	Reps2	X	158.85	2	30.263	rs13476408	12.5598	0.358
1448346_at	Cfl1	19	5.49344	9	69.7615	rs6355445	11.9406	0.358
1416763_at	G431001I09Rik	2	5.71579	13	71.4696	rs13481870	12.4876	0.359
1426499_at	Sh3glb2	2	30.2007	7	24.6467	rs13479153	12.3318	0.359
1428512_at	Bhlhb9	X	132.425	16	12.3864	rs4162800	12.9322	0.359
1421349_x_at	Bm88	7	148.613	6	95.039	rs13478906	12.714	0.36
1435226_at	Ibrdc3	4	128.761	7	15.6199	rs6295100	12.5674	0.36
1453282_at	Cxadr	16	78.34	8	121.267	gnf08.119.598	12.5049	0.36
1456739_x_at	Armcx2	X	131.339	16	12.3864	rs4162800	12.584	0.36
1435565_at	Vps29	5	122.815	5	132.412	D5Mit372	12.0919	0.361
1435669_at	Zfp532	18	65.848	18	73.9701	rs13483437	12.1138	0.361
1437008_x_at	Tmem109	19	10.9452	16	12.3864	rs4162800	12.6506	0.361
1454655_at	Dgkd	1	89.8358	10	122.416	rs13480802	12.6401	0.361
1457936_at	Mapk8	14	34.1924	16	63.7153	rs4151935	12.9321	0.361
1418901_at	Cebpb	2	167.516	7	15.6199	rs6295100	12.6202	0.362
1452347_at	Mef2a	7	74.3769	8	121.267	gnf08.119.598	12.4767	0.362
1422493_at	Cpox	16	58.6789	7	34.4076	rs6239372	11.5693	0.363
1426424_at	Sugt1	14	80.03	7	15.6199	rs6295100	12.7544	0.363
1438432_at	Lnpep	17	17.6605	19	44.2447	rs13483639	11.2385	0.363
1415784_at	Vps35	8	87.808	12	115.998	rs6376011	12.5429	0.364
1423317_at	3110001D03Rik	4	74.9234	14	118.847	rs6265743	12.3483	0.364
1426617_a_at	Ttyh1	7	4.08294	7	15.6199	rs6295100	12.9463	0.364
1426790_at	Ssrp1	2	84.8829	14	71.699	rs13482251	12.7963	0.364
1438458_a_at	Sfpq	4	126.704	11	89.5675	rs13481150	11.8903	0.364
1455215_at	C530028O21Rik	6	124.953	13	54.8887	rs13481817	13.0959	0.364
1451094_at	Ggtl3	2	155.316	19	28.4693	D19Msw029	12.4215	0.365
1416144_a_at	Dhx15	5	52.5415	X	69.2812	DXMit1	12.4989	0.366
1425293_a_at	1500031H04Rik	X	133.53	11	79.3634	rs13481119	12.671	0.366
1428553_at	Glrx5	12	106.279	13	71.4696	rs13481870	12.3752	0.366
1431213_a_at	LOC433762	4	132.654	16	12.3864	rs4162800	12.341	0.366
1434395_at	Man1b	3	100.366	5	132.412	D5Mit372	12.7057	0.366
1441101_at	Hecw1	13	14.3215	14	118.847	rs6265743	12.5514	0.366
1423893_x_at	Apbb1	7	112.707	15	88.2986	rs13482695	12.3449	0.367
1437907_a_at	Tbca	13	95.6127	19	44.2447	rs13483639	12.1567	0.367
1415869_a_at	Trim28	7	13.6159	13	54.8887	rs13481817	12.3542	0.368
1418995_at	Neurod2	11	98.188	7	34.4076	rs6239372	12.6404	0.368
1428874_at	1110019N10Rik	8	107.164	9	24.3667	rs6183014	12.685	0.368
1432646_a_at	2900097C17Rik	2	156.218	16	13.0559	rs4163042	12.0377	0.368
1452679_at	2410129E14Rik	13	34.2191	18	70.9106	gnf18.069.064	12.4548	0.369
1419425_at	Cnr1	4	34.0315	10	122.416	rs13480802	12.323	0.37
1428174_x_at	Khsrp	17	57.1607	15	88.2986	rs13482695	13.0912	0.37
1438062_at	AK029311	7	104.839	X	156.93	gnfX.141.820	12.6333	0.37
1455831_at	Fus	7	135.117	3	54.3657	gnf03.051.000	12.7583	0.37
1422705_at	Tmepai	2	173.054	15	92.8372	rs13482715	12.7431	0.371
1424888_at	2011-03-02	17	33.8287	5	132.412	D5Mit372	12.7309	0.371
1427904_s_at	2410091C18Rik	17	79.3443	6	95.039	rs13478906	12.7995	0.371
1428157_at	Gng2	14	20.6925	3	3.77107	rs13476950	11.82	0.371
1436161_at	Aprin	5	151.612	18	70.9106	gnf18.069.064	12.2557	0.371
1439438_a_at	Cip29	10	128.315	16	12.3864	rs4162800	12.7386	0.371
1448190_at	Mrpl33	5	31.9186	18	70.9106	gnf18.069.064	12.6151	0.371
1449147_at	Chst1	2	92.4549	13	54.8887	rs13481817	12.7327	0.371
1424659_at	Slit2	5	48.6962	2	26.6999	mCV23574676	12.5924	0.372
1434055_at	Galnt9	5	111.05	15	45.1075	rs13482547	12.3096	0.372
1436646_at	A230052E19Rik	2	65.6054	3	157.075	gnf03.160.599	12.8709	0.372
1415932_x_at	Atp9a	2	168.46	7	15.6199	rs6295100	12.6584	0.373
1419088_at	Timp3	10	85.8087	11	4.40873	rs3659787	12.2362	0.373
1426764_at	Oaz2	9	65.5357	11	4.40873	rs3659787	11.4148	0.373
1438619_x_at	Zdhhc14	17	5.7537	2	26.1904	rs3681655	12.2243	0.373
1453651_a_at	Brp44l	17	81.839	8	121.267	gnf08.119.598	12.9726	0.373
1459877_x_at	Rnf185	11	3.31602	X	69.2812	DXMit1	12.6415	0.373
1420643_at	Lfng	5	141.091	16	62.212	rs3693435	12.1381	0.374
1424309_a_at	Mocs2	13	115.616	5	126.432	rs3711495	12.0837	0.374
1429623_at	Zfp644	5	107.046	14	118.847	rs6265743	12.3885	0.374
1437372_at	4733401N12Rik	10	116.792	11	58.0605	rs13481045	12.0782	0.374
1456260_at	Rbbp4	4	129.002	4	49.7924	rs13477695	11.8306	0.374
1420545_a_at	Chn1	2	73.4512	18	16.5577	rs6358426	11.5642	0.375
1426256_at	Timm17a	1	137.198	7	15.6199	rs6295100	12.8593	0.375
1423102_a_at	Rnf10	5	115.692	13	52.7833	rs6209128	12.658	0.376
1445631_at	Tmem16c	2	110.498	X	111.641	CEL-X_106858553	12.5913	0.376
1452893_s_at	2310040A07Rik	4	41.5855	11	79.3634	rs13481119	12.1134	0.376
1429385_at	Wdr68	11	105.915	16	67.8069	rs3695481	12.5533	0.377
1434571_at	Vps13b	15	35.8604	5	132.412	D5Mit372	12.0099	0.377
1435630_s_at	Acat2	17	13.136	13	52.7833	rs6209128	12.0208	0.377
1436702_at	BC034068	5	34.3453	15	88.2986	rs13482695	12.5143	0.377
1439452_x_at	Dnpep	1	75.3051	19	48.7234	CEL-19_48014568	12.4637	0.377
1425599_a_at	Gatad1	5	3.64356	15	88.2986	rs13482695	12.6592	0.378
1434649_at	Ccm2	11	6.49617	13	54.8887	rs13481817	12.1563	0.378
1415981_at	Herpud2	9	24.9126	18	73.9701	rs13483437	12.1119	0.379
1416204_at	Gpd1	15	99.5536	X	69.2812	DXMit1	11.8611	0.379
1416904_at	Mbnl1	3	60.4328	16	12.3864	rs4162800	12.4907	0.379
1442027_at	Nbeal1	1	60.3881	4	49.7924	rs13477695	12.3954	0.379
1456656_at	Lin7A	10	106.86	7	30.1445	rs8261944	12.5289	0.379
1438249_at	Usp7	16	8.69621	14	40.9145	rs13482156	12.2033	0.38
1419066_at	Ier5l	2	30.3282	15	87.9268	rs3707587	12.1285	0.381
1422576_at	Atxn10	15	85.2238	15	88.2986	rs13482695	12.2832	0.381
1423386_at	Psmd9	5	123.692	11	4.40873	rs3659787	11.1684	0.381
1437614_x_at	Zdhhc14	17	5.7536	11	13.5744	rs3673722	11.5626	0.381
1438256_at	Eif5a2	3	28.6957	16	63.7153	rs4151935	12.5156	0.381
1416921_x_at	Aldoa	7	133.939	6	105.778	rs13478951	12.2062	0.382
1422763_at	Gipc1	8	86.188	13	52.7833	rs6209128	12.0463	0.382
1432198_at	6330414G02Rik	19	17.2974	11	4.40873	rs3659787	12.8971	0.382
1435866_s_at	Hist3h2a	11	58.7686	19	44.2447	rs13483639	12.854	0.382
1448334_a_at	Ccni	5	93.611	7	113.857	rs3657482	12.1833	0.382
1452034_at	Prepl	17	85.464	19	38.9008	rs6185741	12.2496	0.382
1433931_at	Thrap5	10	79.3731	15	45.1075	rs13482547	12.3755	0.383
1448376_at	Wrnip1	13	32.9139	15	88.2986	rs13482695	11.7487	0.383
1450401_at	Ncoa6ip	4	3.51842	11	58.0605	rs13481045	12.2808	0.383
1434392_at	Usp34	11	23.3892	15	88.2986	rs13482695	12.3196	0.384
1441960_x_at	5730494M16Rik	18	25.2972	19	47.1974	rs13483649	11.9233	0.384
1452083_a_at	Pja1	X	96.6615	7	114.49	rs13479470	12.0499	0.384
1418452_at	Gng2	14	20.6931	10	123.018	rs6282839	12.3718	0.385
1448737_at	Tspan7	X	10.1732	1	25.3771	rs13475771	12.1988	0.385
1455871_s_at	Tax1bp3	11	72.9954	5	126.432	rs3711495	11.9338	0.385
1434020_at	Pdap1	5	145.892	11	58.9267	rs6344645	11.5079	0.386
1439433_a_at	Slc35a2	X	7.47101	6	95.039	rs13478906	12.5583	0.386
1439998_at	D630035I23Rik	10	66.6539	X	156.93	gnfX.141.820	12.2873	0.386
1440862_at	2810406C15Rik	17	6.63403	19	38.9008	rs6185741	11.862	0.386
1442760_x_at	Rtn4	11	29.6162	4	44.3385	gnf04.041.337	12.8266	0.387
1451894_a_at	Scn8a	15	100.871	4	103.139	rs13477881	12.1434	0.387
1460740_at	Cltb	13	54.694	9	69.7615	rs6355445	11.4823	0.387
1421845_at	Golph3	15	12.2793	3	157.455	rs13477515	11.5559	0.388
1425760_a_at	Pitpnm1	19	4.11276	7	15.6199	rs6295100	12.3014	0.388
1426088_at	Nd5	M	0.013123	9	51.4655	mCV23098764	11.8051	0.388
1426985_s_at	2810485I05Rik	9	13.6505	5	132.412	D5Mit372	12.2448	0.388
1436117_at	Kiaa1107	5	107.94	18	70.9106	gnf18.069.064	12.7511	0.388
1436984_at	Abi2	1	60.5358	4	49.7924	rs13477695	12.5662	0.388
1447898_s_at	Sfrs6	2	162.763	6	104.807	rs13478947	12.7632	0.388
1449324_at	Ero1l	7	112.402	5	132.412	D5Mit372	12.2898	0.388
1454965_at	D430039N05Rik	2	83.7231	16	12.3864	rs4162800	12.4101	0.388
1423122_at	Avpi1	19	42.1979	6	92.586	rs6223362	12.1731	0.389
1422621_at	Ranbp2	10	57.9565	14	118.847	rs6265743	12.3185	0.39
1424078_s_at	Pex6	17	46.8618	13	54.8887	rs13481817	12.4163	0.39
1425249_a_at	Tyro3	2	119.642	4	108.705	gnf04.104.549	12.3931	0.39
1423045_at	Ncbp2	16	31.9577	15	45.1075	rs13482547	12.6599	0.391
1449712_s_at	Atp6v1e1	6	120.745	16	12.3864	rs4162800	11.804	0.391
1439122_at	Ddx6	9	44.4459	16	26.9781	rs4165503	12.3746	0.392
1418968_at	Rb1cc1	1	6.26466	18	73.9701	rs13483437	12.2211	0.393
1415906_at	Tmsb4x	X	163.645	6	92.586	rs6223362	11.7994	0.394
1421955_a_at	Nedd4	9	72.5905	16	67.8069	rs3695481	11.8572	0.394
1436971_x_at	Ywhaz	15	36.7005	7	114.49	rs13479470	12.0139	0.394
1438415_s_at	Yipf2	9	21.3932	13	20.4452	rs3676630	12.0475	0.394
1449303_at	Sesn3	9	14.137	12	114.377	CEL-12_108727612	12.1286	0.394
1456086_x_at	Pqbp1	X	7.47168	16	67.8069	rs3695481	12.5458	0.394
1415703_at	Huwe1	X	148.367	16	63.7153	rs4151935	12.6089	0.395
1424050_s_at	Fgfr1	8	26.6848	15	88.2986	rs13482695	12.6445	0.395
1436948_a_at	6430550H21Rik	X	35.5505	3	142.572	rs6290401	12.4346	0.395
1448101_s_at	Trim27	13	21.2842	15	88.2986	rs13482695	12.6882	0.395
1421269_at	Ugcg	4	59.2338	3	157.455	rs13477515	12.22	0.396
1425610_s_at	Galnt2	8	126.861	16	78.0159	rs4207980	12.0338	0.396
1433723_s_at	Serf2	2	121.279	6	95.039	rs13478906	11.8236	0.396
1455960_at	Egfl5	4	70.093	16	17.5769	rs4165069	12.0673	0.396
1420867_at	Tmed2	5	124.991	15	28.443	rs13482498	11.5149	0.397
1421026_at	Gna12	5	141.236	15	45.1075	rs13482547	12.2866	0.397
1452866_at	Nars	18	64.6593	7	15.6199	rs6295100	12.3594	0.397
1423010_at	Sacs	14	61.8328	16	67.8069	rs3695481	12.3218	0.398
1417135_at	Srpk2	5	23.0338	1	79.6852	D1Mit216	12.2346	0.399
1422554_at	Ndnl2	7	72.0169	15	88.2986	rs13482695	12.3263	0.399
1423557_at	Ifngr2	16	91.5608	1	20.619	rs3670611	12.4176	0.399
1440822_x_at	Reps1	10	17.8448	9	123.812	rs8254393	11.7519	0.399
1423225_at	Selk	14	30.785	17	52.1796	CEL-17_50896182	12.1891	0.4
1423489_at	Mmd	11	90.1394	17	83.3066	rs6263123	11.834	0.4
1428148_s_at	Coro7	16	4.62714	7	15.6199	rs6295100	12.3565	0.4
1438068_at	CA874842	5	108.795	18	70.5928	rs13483427	12.5961	0.4
1438199_at	AI316807	8	23.5736	8	7.70105	CEL-8_7689226	12.5765	0.4
1438958_x_at	Fkbp1a	2	151.387	3	142.572	rs6290401	12.4174	0.4
1455229_x_at	4933424M23Rik	11	117.885	13	54.8887	rs13481817	11.4417	0.4
1456499_at	Rnf130	11	49.9339	11	58.0605	rs13481045	11.7063	0.4
1436839_at	2010109K11Rik	12	33.0673	5	132.412	D5Mit372	12.468	0.402
1417089_a_at	Ckmt1	2	121.187	15	88.2986	rs13482695	12.4159	0.403
1417472_at	Myh9	15	77.5913	9	81.6566	rs3673457	12.2828	0.403
1418822_a_at	Arf6	12	70.4746	17	83.3066	rs6263123	12.1964	0.405
1420375_at	Kif3a	11	53.3967	11	58.0605	rs13481045	12.0513	0.405
1435274_at	4921517N04Rik	2	23.3618	9	69.7615	rs6355445	12.7797	0.405
1451254_at	Ikbkap	4	56.7639	2	26.6999	mCV23574676	12.3075	0.405
1416190_a_at	Sec61a1	6	88.4561	13	52.7833	rs6209128	12.4904	0.406
1423758_at	G3bp2	5	92.4814	2	26.6999	mCV23574676	12.6107	0.406
1424956_at	D030015G18Rik	4	132.622	15	88.2986	rs13482695	11.5854	0.406
1426416_a_at	2310034L04Rik	17	74.8983	1	20.619	rs3670611	12.0344	0.406
1435003_at	Pik4ca	16	17.2805	16	67.8069	rs3695481	11.9238	0.406
1435857_s_at	Aplp1	7	31.22	13	54.8887	rs13481817	12.526	0.406
1432271_a_at	4833420K19Rik	9	7.20326	5	132.412	D5Mit372	12.3521	0.407
1436959_x_at	Nelf	2	24.9183	9	81.6566	rs3673457	11.6934	0.407
1438853_x_at	Ddx54	5	121.077	15	87.9268	rs3707587	11.8726	0.407
1441927_at	Syt7	19	10.526	15	28.443	rs13482498	11.9141	0.407
1443212_at	Large	8	75.8537	3	89.6293	CEL-3_89968332	11.7355	0.407
1455771_at	Bzrap1	11	87.5991	7	15.6199	rs6295100	10.7408	0.407
1456998_at	Dbpht2	12	75.399	X	69.2812	DXMit1	11.4447	0.407
1415788_at	Ublcp1	11	44.2683	16	12.3864	rs4162800	11.9805	0.408
1417287_at	H13	2	152.526	14	118.847	rs6265743	12.0476	0.408
1420610_at	Prkacb	3	146.41	16	67.8069	rs3695481	12.139	0.408
1451542_at	Ssbp2	13	91.8426	X	156.93	gnfX.141.820	12.2543	0.408
1416368_at	Gsta4	9	78.0537	5	123.549	rs13478499	11.9969	0.409
1422063_a_at	Pex5	6	124.348	2	26.1904	rs3681655	12.221	0.409
1430123_a_at	Akr1a4	4	116.309	9	81.6566	rs3673457	12.218	0.409
1417279_at	Itpr1	6	108.5	19	44.2447	rs13483639	12.07	0.41
1423278_at	Ptprk	10	28.3165	7	30.1445	rs8261944	11.9199	0.41
1427321_s_at	Cxadr	16	78.3391	2	77.9012	rs13476589	12.3031	0.41
1434310_at	Bmpr2	1	59.9339	2	26.6999	mCV23574676	12.1957	0.41
1436783_x_at	Ywhab	2	163.844	X	156.93	gnfX.141.820	11.2622	0.41
1419112_at	Nlk	11	78.3818	7	26.7766	rs13479163	11.7283	0.411
1439611_at	Chrm1	19	8.75437	15	88.2986	rs13482695	12.6894	0.411
1416179_a_at	Rdx	9	51.8966	X	69.2812	DXMit1	11.505	0.412
1417727_at	Sfrs9	5	115.782	15	88.2986	rs13482695	11.9883	0.412
1428326_s_at	Hrsp12	15	34.4139	19	44.2447	rs13483639	12.2498	0.412
1436393_a_at	Trim37	11	87.0318	19	38.9008	rs6185741	12.2072	0.412
1437045_at	Mapk8	14	34.2047	11	79.3634	rs13481119	12.0123	0.412
1448548_at	Tulp4	17	6.24005	2	26.6999	mCV23574676	12.4065	0.412
1417340_at	Txnl2	7	144.651	18	70.5928	rs13483427	12.2231	0.413
1424663_at	BC017647	11	77.969	11	58.0605	rs13481045	11.7255	0.413
1430780_a_at	Pmm1	15	81.7867	15	88.2986	rs13482695	11.9419	0.413
1439442_x_at	2210023C10Rik	16	16.3096	2	159.995	rs6152944	11.9952	0.413
1449296_a_at	Cnp1	11	100.442	2	26.1904	rs3681655	12.3315	0.413
1450904_at	0610041E09Rik	13	90.2445	7	30.1445	rs8261944	12.1227	0.413
1452371_at	Sfrs11	3	157.674	15	88.2986	rs13482695	11.9521	0.413
1424719_a_at	Mapt	11	104.172	7	30.1445	rs8261944	12.2504	0.414
1426343_at	Stt3b	9	115.153	10	123.018	rs6282839	11.7501	0.414
1435305_at	C030027L06Rik	13	59.2308	11	58.0605	rs13481045	11.919	0.414
1451205_at	Psmb4	3	94.6888	13	96.5572	rs13481955	12.2566	0.414
1421915_a_at	St3gal3	4	117.613	5	132.412	D5Mit372	12.6595	0.415
1427185_at	Mef2a	7	74.3762	2	26.6999	mCV23574676	11.7378	0.415
1429882_at	Cdh11	8	19.6879	11	67.1951	rs3715924	12.1479	0.415
1436059_at	Rfx1	8	86.6203	7	34.4076	rs6239372	12.0031	0.415
1438736_at	Thoc2	X	39.1756	11	58.0605	rs13481045	11.9198	0.415
1447725_at	C030034E14Rik	X	100.211	13	54.8887	rs13481817	12.4684	0.415
1455734_at	Crbn	6	106.729	X	156.93	gnfX.141.820	12.547	0.415
1421877_at	Mapk9	11	49.6968	10	123.018	rs6282839	11.8593	0.416
1436579_s_at	Itsn1	16	91.9204	9	69.7615	rs6355445	12.0089	0.416
1424442_a_at	Pja2	17	64.6323	7	26.7766	rs13479163	11.4763	0.417
1434920_a_at	Evl	12	109.926	13	52.7833	rs6209128	12.608	0.417
1425721_at	Phip	9	82.7639	16	63.7153	rs4151935	11.8198	0.418
1428314_at	Pcnp	16	56.0156	18	3.51654	rs13483183	9.6991	0.418
1452652_at	Ris1	9	123.169	13	52.7833	rs6209128	12.1124	0.418
1415990_at	Vdac2	14	22.6597	13	71.4696	rs13481870	11.2849	0.419
1418911_s_at	Acsl4	X	138.753	15	28.443	rs13482498	10.7738	0.419
1424607_a_at	LOC432823	Un	1	13	52.7833	rs6209128	12.2457	0.419
1424776_a_at	Slc25a28	19	43.7383	11	79.3634	rs13481119	12.1841	0.419
1434703_at	Extl3	14	65.671	7	15.6199	rs6295100	12.3408	0.419
1449710_s_at	Atp5a1	18	78.0212	16	12.3864	rs4162800	11.7222	0.419
1456102_a_at	Cul5	9	53.4508	1	79.6852	D1Mit216	11.6619	0.419
1418865_at	Zfp385	15	103.144	13	54.8887	rs13481817	11.9421	0.42
1423194_at	Arhgap5	12	53.6204	19	38.9008	rs6185741	12.4241	0.421
1423995_at	Kif1b	4	148.553	16	12.3864	rs4162800	11.371	0.421
1436216_s_at	Inf2	12	113.853	6	95.039	rs13478906	12.2449	0.421
1448264_a_at	Eif3s2	4	129.269	19	44.2447	rs13483639	12.2762	0.421
1455033_at	B430201A12Rik	3	108.777	7	30.1445	rs8261944	11.4563	0.421
1456202_at	6330514E13Rik	15	78.5005	15	88.2986	rs13482695	11.7325	0.421
1415729_at	Pdpk1	17	24.2107	2	26.6999	mCV23574676	12.344	0.422
1417502_at	Tspan7	X	10.1593	18	73.9701	rs13483437	11.5246	0.422
1419719_at	Gabrb1	5	72.5279	5	126.432	rs3711495	12.0404	0.422
1431804_a_at	Sp3	2	72.7753	11	20.8533	rs3023251	11.4809	0.422
1456205_x_at	Tbca	13	95.6126	19	44.2447	rs13483639	11.7409	0.422
1416949_s_at	Slc39a7	17	34.1656	3	148.544	gnf03.152.088	12.2899	0.423
1419392_at	Pclo	5	14.7954	9	69.7615	rs6355445	12.6232	0.423
1435894_at	C030014L02	4	102.649	18	70.9106	gnf18.069.064	11.8585	0.423
1451051_a_at	Scyl1	19	5.75897	7	15.6199	rs6295100	12.0637	0.423
1452929_at	Rsn	5	124.028	15	88.2986	rs13482695	12.5299	0.424
1455407_at	Zfp236	18	82.763	2	30.263	rs13476408	12.0972	0.424
1455742_x_at	Morf4l1	9	89.9865	17	83.3066	rs6263123	12.0084	0.424
1416521_at	Sepw1	7	16.5027	15	45.1075	rs13482547	12.1081	0.425
1418568_x_at	Srp14	2	118.302	15	95.7777	rs13482726	11.2899	0.425
1440856_at	Mapk8	14	34.1912	6	77.4513	rs3663024	12.4531	0.425
1452427_s_at	Ptplad1	9	64.8362	10	123.018	rs6282839	11.6953	0.425
1415775_at	Rbbp7	X	159.216	15	45.1075	rs13482547	12.058	0.426
1416467_at	Ddx3x	X	12.8683	7	30.1445	rs8261944	11.9072	0.426
1427157_at	E030025D05Rik	11	28.2874	7	115.203	mCV24779699	12.4314	0.426
1440849_at	6330417G04Rik	13	92.0201	9	71.2818	rs13459110	11.7906	0.426
1452024_a_at	Ldb1	19	46.1075	15	88.2986	rs13482695	12.0903	0.426
1415671_at	Atp6v0d1	8	108.049	9	69.7615	rs6355445	11.9605	0.427
1424082_at	Tbc1d13	2	30.007	1	22.1536	mCV23695025	12.1011	0.427
1452923_at	1810058I14Rik	13	108.882	18	70.9106	gnf18.069.064	11.7311	0.427
1416246_a_at	Coro1a	7	133.843	X	156.93	gnfX.141.820	12.2288	0.428
1417767_at	Cyp5b	8	109.709	10	123.018	rs6282839	11.771	0.428
1423127_at	Impa1	3	10.3142	7	15.6199	rs6295100	11.9038	0.428
1427481_a_at	Atp1a3	7	25.7632	13	54.8887	rs13481817	12.1697	0.428
1451231_a_at	Cul2	18	3.43485	18	70.9106	gnf18.069.064	11.7203	0.428
1437838_x_at	Grsf1	5	89.0885	11	22.9284	rs6283329	11.9479	0.429
1452860_at	Fbxl17	17	63.409	7	34.4076	rs6239372	11.9709	0.429
1415851_a_at	Impdh2	9	108.468	6	64.7458	rs13478800	11.8412	0.43
1417385_at	Npepps	11	97.0683	11	58.0605	rs13481045	11.6672	0.43
1425537_at	Ppm1a	12	73.8899	15	28.9905	rs3702361	11.8631	0.43
1436709_at	C230096C10Rik	4	138.931	15	28.443	rs13482498	11.6837	0.43
1416027_at	Pdcd6	13	74.4411	13	71.4696	rs13481870	11.509	0.431
1417716_at	Got2	8	98.389	16	12.3864	rs4162800	12.0853	0.431
1449686_s_at	Scp2	4	107.717	18	70.9106	gnf18.069.064	11.9549	0.431
1452005_at	Dlat	9	50.4428	7	24.6467	rs13479153	11.5374	0.431
1452700_s_at	Kbtbd7	14	79.8305	11	8.73673	rs3714397	12.3098	0.431
1452800_a_at	0610008C08Rik	X	91.6361	5	123.549	rs13478499	11.7438	0.431
1416951_a_at	Atp6v1d	12	79.944	15	28.9905	rs3702361	12.125	0.432
1429044_at	4930541M15Rik	1	138.165	2	26.6999	mCV23574676	11.4511	0.432
1423617_at	Cog8	8	109.571	15	45.1075	rs13482547	11.2482	0.433
1437774_at	Spint1	2	119.428	7	30.1445	rs8261944	11.8966	0.433
1425861_x_at	Cacna2d1	5	15.8769	16	63.7153	rs4151935	12.3909	0.434
1457270_at	B230343A10Rik	11	67.5019	6	92.586	rs6223362	11.7937	0.434
1416533_at	Egln2	7	27.9438	13	54.8887	rs13481817	12.3969	0.435
1418209_a_at	Pfn2	3	57.646	3	154.259	rs3716135	11.5013	0.435
1421176_at	Rasgrp1	2	117.111	19	38.9008	rs6185741	12.1391	0.435
1422702_at	Oazin	15	38.4197	5	132.412	D5Mit372	12.5771	0.435
1423910_at	Centg3	5	24.0073	15	88.2986	rs13482695	12.3544	0.435
1428866_at	2810037O22Rik	14	61.0065	2	26.6999	mCV23574676	12.2334	0.435
1437225_x_at	Gnai3	3	107.91	6	105.778	rs13478951	12.0917	0.435
1438051_at	Ttc14	3	33.7071	18	70.9106	gnf18.069.064	12.2665	0.435
1452433_at	BB662083	11	None	4	44.3385	gnf04.041.337	11.8596	0.435
1415795_at	Spin	9	51.2079	10	122.416	rs13480802	11.9735	0.436
1416900_s_at	Lass1	8	72.855	7	15.6199	rs6295100	12.1404	0.436
1422945_a_at	Kif5c	2	49.5495	11	58.0605	rs13481045	11.9629	0.436
1424490_at	Zfp428	7	25.3004	15	88.2986	rs13482695	12.0742	0.436
1433726_at	2310035C23Rik	1	107.651	15	45.1075	rs13482547	12.115	0.436
1435534_a_at	Tomm20	8	19.9884	18	70.9106	gnf18.069.064	12.1383	0.436
1455821_x_at	C1qbp	11	70.7914	13	81.5707	rs13481905	11.89	0.436
1430154_at	Vps13a	19	16.7071	15	88.2986	rs13482695	11.9837	0.437
1434320_at	Arhgap12	18	6.0421	16	63.7153	rs4151935	12.1605	0.437
1437468_x_at	Fbxw11	11	32.6466	15	79.5	rs4230869	11.0113	0.437
1451762_a_at	Kif1b	4	148.555	16	12.3864	rs4162800	12.0331	0.438
1428715_at	Gftp1	6	87.0416	9	123.812	rs8254393	12.0496	0.439
1439553_s_at	Nutf2	8	108.403	4	62.1936	rs3690581	11.4108	0.439
1444199_at	Mfsd4	1	133.92	11	89.5675	rs13481150	11.7565	0.44
1450038_s_at	Usp9x	X	12.7486	9	34.3263	rs6258765	11.846	0.44
1415691_at	Dlg1	16	31.8728	6	112.817	rs13478978	11.5886	0.441
1425531_at	Znhit1	5	137.458	8	121.267	gnf08.119.598	11.8983	0.441
1433519_at	Nucks1	1	133.832	12	114.377	CEL-12_108727612	12.4455	0.441
1450833_at	Chrm1	19	8.75339	15	45.1075	rs13482547	11.8071	0.441
1417508_at	Rnf19	15	36.1698	6	77.4513	rs3663024	12.1729	0.442
1421181_at	Nptxr	15	79.6198	16	12.3864	rs4162800	12.1546	0.442
1416770_at	Stk25	1	95.5188	11	20.8533	rs3023251	10.6687	0.443
1452226_at	2610510H01Rik	4	140.276	10	122.416	rs13480802	12.3208	0.443
1419047_at	Pcnx	12	83.0975	5	132.412	D5Mit372	11.7156	0.444
1419979_s_at	Creb3	4	43.5797	16	12.3864	rs4162800	11.6805	0.444
1421053_at	Kif1a	1	94.9149	7	15.6199	rs6295100	12.069	0.444
1421327_at	Mtap2	1	66.4801	16	67.8069	rs3695481	11.9422	0.444
1424358_at	Ube2e2	14	19.4061	16	67.8069	rs3695481	12.1862	0.444
1434598_at	D13Wsu64e	13	9.17176	5	132.412	D5Mit372	11.757	0.444
1435028_at	Wdr7	18	64.1489	16	63.7153	rs4151935	11.319	0.444
1438641_x_at	1500016O10Rik	7	133.974	18	70.9106	gnf18.069.064	11.5414	0.444
1444151_at	Elavl3	9	21.8527	4	44.3385	gnf04.041.337	11.66	0.444
1431026_at	4930487N19Rik	14	49.8075	11	20.8533	rs3023251	11.1323	0.445
1459072_at	D630028G08Rik	14	94.0351	11	58.0605	rs13481045	11.2234	0.445
1460328_at	Brd3	2	27.3124	15	79.5	rs4230869	12.1213	0.445
1437163_x_at	Gtf2h4	17	35.8047	17	83.3066	rs6263123	12.207	0.446
1450504_a_at	Agpat3	10	77.7369	2	26.6999	mCV23574676	11.3739	0.446
1452825_at	Bsmap	8	73.0078	9	69.7615	rs6355445	11.9541	0.446
1424609_a_at	Xdh	X	156.719	13	52.7833	rs6209128	11.82	0.447
1431164_at	Rragd	4	33.1059	16	13.0559	rs4163042	11.9111	0.447
1436071_at	Ankrd26	6	118.451	19	28.4693	D19Msw029	12.3323	0.447
1426405_at	Rnf11	4	109.125	16	38.2971	rs4151928	11.5459	0.448
1448313_at	Cln2	7	112.895	5	126.432	rs3711495	12.1154	0.448
1416082_at	Rab1	11	20.1249	5	126.432	rs3711495	11.3862	0.449
1423231_at	Nrgn	9	37.3525	15	45.1075	rs13482547	12.251	0.449
1426738_at	Dgkz	2	91.7732	13	54.8887	rs13481817	12.3198	0.449
1439797_at	Ppard	17	28.438	7	30.1445	rs8261944	10.8704	0.449
1452638_s_at	Dnm1l	16	16.337	19	38.9008	rs6185741	12.1053	0.449
1460005_at	A230054D04Rik	5	42.224	3	54.3657	gnf03.051.000	11.666	0.449
1438505_s_at	Rnasen	15	12.8649	15	12.6174	rs13482436	11.1542	0.45
1439216_at	9430047G12Rik	8	41.4464	X	156.93	gnfX.141.820	11.7545	0.45
1416540_at	Hgs	11	120.345	7	34.4076	rs6239372	11.4388	0.451
1425206_a_at	0610009M14Rik	7	66.5626	16	67.8069	rs3695481	11.8471	0.451
1437841_x_at	AI481750	15	81.7812	13	52.7833	rs6209128	12.522	0.451
1438677_at	Pkp4	2	59.1606	11	79.0684	rs13481117	12.1303	0.451
1439173_at	Hook1	4	95.6817	11	58.0605	rs13481045	11.2346	0.451
1448668_a_at	Irak1	X	71.2606	15	92.8372	rs13482715	12.1707	0.451
1434367_s_at	Nutf2	8	108.403	18	70.9106	gnf18.069.064	11.7846	0.452
1435319_at	Ihpk2	9	108.709	18	73.9701	rs13483437	11.7835	0.452
1456227_x_at	Rbbp7	X	159.217	17	83.3066	rs6263123	11.5555	0.452
1426562_a_at	Olfm1	2	28.0636	15	88.2986	rs13482695	12.4423	0.453
1435174_at	Rsbn1	3	103.77	9	69.7615	rs6355445	11.9055	0.453
1447763_at	Snap25	2	136.607	3	157.455	rs13477515	11.5134	0.453
1447938_at	4933409K07Rik	4	42.482	X	111.641	CEL-X_106858553	11.7296	0.453
1419038_a_at	Csnk2a1	2	152.053	11	58.0605	rs13481045	12.0735	0.454
1423432_at	Phip	9	82.7944	11	58.0605	rs13481045	11.5389	0.454
1426828_at	1300018I17Rik	8	125.767	13	52.7833	rs6209128	11.7826	0.454
1435864_a_at	1810063B05Rik	8	128.949	18	70.9106	gnf18.069.064	11.7492	0.454
1437767_s_at	Aktip	8	93.6474	4	104.787	rs13477919	11.4498	0.454
1438366_x_at	Clcn3	8	63.3918	17	83.3066	rs6263123	11.9397	0.454
1445534_at	Flnb	14	8.77069	11	58.0605	rs13481045	11.882	0.454
1420827_a_at	Ccng1	11	40.5621	4	100.928	rs13477873	11.4862	0.455
1420945_at	Atrx	X	102.996	16	67.8069	rs3695481	11.5919	0.455
1420998_at	Etv5	16	22.3831	16	12.3864	rs4162800	11.9041	0.455
1427991_s_at	Usp45	4	21.7646	X	69.2812	DXMit1	12.0808	0.455
1450683_at	Tagln3	16	45.7117	15	88.2986	rs13482695	11.8956	0.455
1453008_at	2300002D11Rik	4	133.047	13	54.8887	rs13481817	11.944	0.455
1421508_at	Odz1	X	39.8856	10	104.985	rs6283474	11.3225	0.456
1422500_at	Idh3a	9	54.4521	12	114.377	CEL-12_108727612	12.0234	0.456
1434427_a_at	St6galnac2	11	116.198	11	8.73673	rs3714397	11.2152	0.456
1437749_s_at	Mrpl9	3	94.2523	18	70.9106	gnf18.069.064	11.8203	0.456
1438451_at	Rics	9	32.0683	11	58.0605	rs13481045	10.9391	0.456
1436992_x_at	Vdac1	11	52.2027	15	12.6174	rs13482436	11.525	0.457
1437238_x_at	Nmd3	3	69.5528	11	4.40873	rs3659787	11.9483	0.457
1455545_at	1110065P20Rik	4	124.527	15	79.5	rs4230869	11.9707	0.457
1428256_at	Txndc15	13	55.827	16	62.212	rs3693435	11.6637	0.458
1447931_at	Whsc1l1	8	26.785	4	44.3385	gnf04.041.337	11.8435	0.458
1452281_at	Sos2	12	70.6848	9	123.812	rs8254393	11.8278	0.458
1422716_a_at	Acp1	12	31.5798	X	69.2812	DXMit1	10.4023	0.459
1425600_a_at	Plcb1	2	135.171	10	122.416	rs13480802	11.64	0.459
1426401_at	Ppp3ca	3	136.599	3	157.075	gnf03.160.599	12.1211	0.459
1435135_at	Aadacl1	3	27.1404	1	79.6852	D1Mit216	11.5908	0.459
1437080_s_at	Psmd11	11	80.285	16	12.3864	rs4162800	11.9791	0.459
1443558_s_at	C630002B14Rik	10	86.3007	6	95.039	rs13478906	11.8679	0.459
1460648_at	Nr2f6	8	73.8984	15	28.443	rs13482498	11.3515	0.459
1428603_at	Glcci1	6	8.37821	16	63.7153	rs4151935	12.1709	0.46
1435023_at	Itsn2	12	4.68573	9	123.812	rs8254393	12.0703	0.46
1438365_x_at	Laptm4b	15	34.2139	16	12.3864	rs4162800	11.7291	0.46
1439527_at	BB114106	9	8.96807	11	4.40873	rs3659787	12.2032	0.46
1436014_a_at	Rusc1	3	88.888	13	52.7833	rs6209128	12.0239	0.461
1418646_at	Gna-rs1	17	36.1248	6	95.039	rs13478906	11.9331	0.462
1419642_at	Purb	11	6.37001	7	30.1445	rs8261944	10.9631	0.462
1455077_a_at	Morf4l1	9	89.9866	3	157.455	rs13477515	11.1968	0.462
1426758_s_at	Gtl2	12	110.788	11	121.364	CEL-11_121219118	11.7954	0.463
1426900_at	Jmjd1c	10	66.7185	15	79.5	rs4230869	11.5026	0.463
1449714_at	5730472N09Rik	2	30.2407	2	26.6999	mCV23574676	11.8809	0.463
1454764_s_at	Slc38a1	15	96.402	6	77.4513	rs3663024	12.197	0.463
1455165_at	Rora	9	69.2355	13	54.8887	rs13481817	11.7094	0.463
1459733_at	Pea15	1	174.132	4	44.3385	gnf04.041.337	11.8021	0.463
1443665_at	5430428G01Rik	6	148.941	7	30.1445	rs8261944	11.8602	0.464
1426775_s_at	Scamp1	13	94.9716	8	121.267	gnf08.119.598	11.5776	0.466
1451226_at	Pex6	17	46.8616	7	34.4076	rs6239372	12.1513	0.466
1453245_at	9130024F11Rik	1	57.0315	13	20.4452	rs3676630	11.6383	0.466
1429786_a_at	Zwint	10	72.1198	9	15.6396	gnf09.010.169	11.2568	0.467
1439341_at	KIAA4095	18	10.5625	9	69.7615	rs6355445	11.8143	0.467
1436715_s_at	Cdipt	7	134.124	16	12.3864	rs4162800	12.1699	0.468
1442950_at	Nrg3	14	40.0293	4	44.3385	gnf04.041.337	11.7679	0.468
1449044_at	Eef1e1	13	38.7377	1	45.4539	rs6370110	12.0206	0.468
1459791_at	Dnajc1	2	18.2303	4	44.3385	gnf04.041.337	11.2783	0.468
1460621_x_at	Ywhaq	12	21.3962	15	28.443	rs13482498	11.69	0.468
1460718_s_at	Mtch1	17	29.4693	13	52.7833	rs6209128	11.7199	0.468
1426792_s_at	Rusc2	4	43.4395	15	88.2986	rs13482695	12.1744	0.469
1451387_s_at	Cuta	17	27.075	14	118.847	rs6265743	11.32	0.469
1453723_x_at	Ubb	11	62.3662	3	154.259	rs3716135	10.9899	0.469
1415895_at	Snrpn	7	67.1283	18	16.5577	rs6358426	11.0787	0.47
1416285_at	Ndufc1	3	51.2121	14	118.847	rs6265743	11.7572	0.47
1424274_at	Vdp	5	92.6312	18	73.9701	rs13483437	11.6281	0.47
1424394_at	Selm	11	3.41504	8	121.267	gnf08.119.598	11.8781	0.47
1425550_a_at	Prkar1a	11	109.527	16	63.7153	rs4151935	11.0394	0.47
1426479_a_at	Tnrc5	17	46.8731	15	88.2986	rs13482695	11.3856	0.47
1434232_a_at	2610030H06Rik	X	69.0699	13	52.7833	rs6209128	11.9395	0.47
1437110_at	2810474O19Rik	6	149.274	5	41.8195	rs3662682	11.0189	0.47
1456444_at	Fbxo41	6	85.4206	11	58.0605	rs13481045	11.2608	0.47
1421100_a_at	Dab1	4	104.351	11	58.0605	rs13481045	11.8356	0.471
1429362_a_at	Sf3b2	19	5.28758	16	12.3864	rs4162800	12.0909	0.471
1433558_at	Dab2ip	2	35.586	7	15.6199	rs6295100	11.9297	0.471
1444615_x_at	Runx1t1	4	13.8181	X	69.2812	DXMit1	11.2625	0.471
1420622_a_at	Hspa8	9	40.6124	7	114.49	rs13479470	12.2773	0.472
1427307_a_at	C630028C02Rik	4	104.401	11	58.0605	rs13481045	10.9998	0.472
1427980_at	4933407C03Rik	8	119.977	7	15.6199	rs6295100	11.3987	0.472
1438430_at	Hbp1	12	32.6131	12	114.377	CEL-12_108727612	11.7703	0.472
1451506_at	Mef2c	13	83.8035	11	58.0605	rs13481045	10.5095	0.472
1419176_at	D8Ertd531e	8	41.6342	2	160.461	rs13476878	11.7842	0.473
1426544_a_at	Ttc14	3	33.706	11	58.0605	rs13481045	11.4818	0.473
1436990_s_at	Ndg2	10	75.4004	9	34.3263	rs6258765	12.0058	0.473
1452434_s_at	Dgcr6	16	18.071	11	79.0684	rs13481117	11.6355	0.473
1418157_at	Nr2f1	13	78.3283	18	70.9106	gnf18.069.064	11.895	0.474
1434393_at	Usp34	11	23.3841	16	67.8069	rs3695481	11.7828	0.474
1456582_x_at	5230400G24Rik	1	82.7488	3	142.572	rs6290401	11.416	0.474
1447667_x_at	Map3k4	17	12.4206	15	88.2986	rs13482695	12.22	0.475
1455755_at	Gm88	17	46.394	13	54.8887	rs13481817	11.839	0.475
1428184_at	C8orf46	1	9.61665	16	41.6072	rs3663871	10.9708	0.476
1438258_at	Vldlr	19	27.326	11	58.0605	rs13481045	10.9713	0.476
1421312_a_at	Kifc2	15	76.4981	13	54.8887	rs13481817	11.8182	0.477
1423215_at	Spcs2	7	106.988	16	12.3864	rs4162800	11.3862	0.477
1421062_s_at	Clta	4	44.0455	18	73.9701	rs13483437	11.8385	0.478
1435112_a_at	Atp5h	11	115.277	9	24.3667	rs6183014	12.1424	0.478
1437327_x_at	2310057D15Rik	5	100.498	9	24.3667	rs6183014	11.5993	0.478
1438018_at	Hook1	4	95.6915	18	70.5928	rs13483427	11.1848	0.478
1449412_at	Orb3	11	98.299	1	45.4539	rs6370110	11.7234	0.478
1453556_x_at	Dhrsx	Un	0	15	92.8372	rs13482715	11.6283	0.478
1460194_at	Phyh	2	4.85884	11	79.3634	rs13481119	12.0377	0.478
1417768_at	Ipla2g	12	45.4126	2	26.6999	mCV23574676	11.44	0.479
1452499_a_at	Kif2a	13	107.755	10	123.018	rs6282839	11.433	0.479
1421075_s_at	Cyp7b1	3	17.9723	13	54.8887	rs13481817	11.2327	0.48
1424862_s_at	Mib2	4	155.029	7	15.6199	rs6295100	11.5452	0.48
1437455_a_at	Btg1	10	96.082	X	69.2812	DXMit1	11.7633	0.48
1448347_a_at	Gpiap1	2	103.605	3	157.455	rs13477515	10.5843	0.48
1448825_at	Pdk2	11	94.8877	15	88.2986	rs13482695	11.5955	0.48
1460360_at	Asrgl1	19	9.18766	11	79.3634	rs13481119	11.1453	0.48
1416671_a_at	Mcoln1	8	3.51265	15	88.2986	rs13482695	11.1565	0.481
1422521_at	Dctn1	6	83.1486	7	15.6199	rs6295100	11.5198	0.481
1436362_x_at	Iap	4	42.1964	4	44.3385	gnf04.041.337	11.4612	0.482
1441716_at	BB408626	8	34.5047	X	156.93	gnfX.141.820	11.3004	0.482
1451465_at	Ubl7	9	57.7704	15	45.1075	rs13482547	11.6746	0.482
1460704_at	Rfng	11	120.642	12	114.377	CEL-12_108727612	11.739	0.482
1416782_s_at	DXImx39e	X	7.30784	11	79.3634	rs13481119	11.6805	0.483
1451663_a_at	Trim3	7	112.759	7	15.6199	rs6295100	11.8478	0.483
1423983_at	Sez6l2	7	134.111	7	34.4076	rs6239372	11.7673	0.484
1437082_at	Akap9	5	3.95439	11	58.0605	rs13481045	11.065	0.484
1437966_at	B230206N24Rik	6	113.444	7	34.4076	rs6239372	11.5856	0.484
1451726_at	Mtmr6	14	60.9199	13	12.117	rs13459139	11.2416	0.484
1452057_at	Actr1b	1	36.7566	X	69.2812	DXMit1	11.7987	0.484
1431196_at	Atp2c1	9	105.362	16	12.3864	rs4162800	10.9268	0.485
1435635_at	Pcmtd1	1	7.15098	19	38.9008	rs6185741	11.7259	0.485
1429088_at	Lbh	17	73.2907	12	114.377	CEL-12_108727612	11.81	0.486
1435134_at	Aadacl1	3	27.1409	10	123.018	rs6282839	11.6864	0.486
1442830_at	Nusap1	2	119.473	4	31.8934	rs6177140	11.9741	0.486
1455151_at	Akap9	5	3.96046	1	57.7699	rs13475879	11.1006	0.486
1422293_a_at	Kctd1	18	15.1282	15	45.1075	rs13482547	11.8156	0.487
1423806_at	2610034N24Rik	7	104.684	13	39.815	rs3701164	11.6246	0.487
1434270_at	Nptxr	15	79.6168	7	15.6199	rs6295100	12.3014	0.487
1434415_at	MGC15476	7	17.4721	7	15.6199	rs6295100	11.42	0.487
1416113_at	Fkbp8	8	73.0584	15	88.2986	rs13482695	12.1707	0.488
1435400_at	Efha2	8	41.4711	7	114.49	rs13479470	11.8384	0.488
1452921_at	Evi5l	8	4.20751	13	52.7833	rs6209128	12.0956	0.488
1459854_s_at	Tcte1l	X	9.23151	16	12.3864	rs4162800	11.5874	0.488
1416020_a_at	Atp5g1	11	95.9349	13	71.4696	rs13481870	10.9122	0.489
1423007_a_at	Gfra2	14	71.3661	16	12.3864	rs4162800	11.7888	0.489
1428707_at	Ptms	6	124.864	15	88.2986	rs13482695	11.6226	0.489
1451000_at	Tmem126a	7	97.5993	19	44.2447	rs13483639	11.024	0.489
1416112_at	Cox8a	19	7.29191	6	124.022	gnf06.122.747	11.6932	0.49
1456900_at	9530066K23Rik	11	97.7087	8	7.70105	CEL-8_7689226	11.3917	0.49
1427269_at	Sfrs11	3	157.674	13	52.7833	rs6209128	11.7281	0.491
1426574_a_at	Add3	19	53.3129	7	30.1445	rs8261944	10.7292	0.492
1428645_at	Gnai3	3	107.91	2	26.1904	rs3681655	11.9892	0.492
1439271_x_at	Ik	18	36.9171	16	12.3864	rs4162800	12.0072	0.492
1416228_at	Pin1	9	20.4668	13	69.04	rs13481861	10.9341	0.493
1434897_a_at	Slc25a4	8	47.2926	7	114.49	rs13479470	11.5857	0.493
1448304_a_at	Rab6	7	107.788	7	113.857	rs3657482	11.31	0.493
1423221_at	Tubb4	17	57.2195	7	34.4076	rs6239372	11.7105	0.494
1433624_at	5830434P21Rik	2	32.0895	2	26.6999	mCV23574676	11.4811	0.494
1434101_at	Nfib	4	81.9385	3	54.3657	gnf03.051.000	11.4059	0.494
1439572_at	R3hdm	1	130.003	16	69.6854	rs4199265	11.6469	0.494
1456914_at	Slc16a4	3	107.109	15	79.5	rs4230869	11.8208	0.494
1416482_at	Ttc3	16	94.6648	16	67.8069	rs3695481	11.2916	0.495
1419978_s_at	D10Ertd610e	10	126.62	6	95.039	rs13478906	11.9743	0.495
1429708_at	Ndufa11	17	56.8573	6	92.586	rs6223362	10.9869	0.495
1435733_x_at	Rnaseh2c	19	5.60251	X	128.95	rs13484003	11.6889	0.495
1438688_at	Srrm2	17	23.9439	11	58.0605	rs13481045	11.6409	0.495
1450846_at	Bzw1	1	58.4559	16	63.7153	rs4151935	11.5543	0.495
1452789_at	Snn	16	11.0744	6	95.039	rs13478906	11.8168	0.495
1419914_s_at	D10Ertd438e	10	52.1584	2	72.2026	rs13476571	10.8424	0.496
1448219_a_at	Ywhaz	15	36.7017	11	13.5744	rs3673722	11.0718	0.496
1455796_x_at	Olfm1	2	28.0861	7	113.857	rs3657482	11.1498	0.496
1458401_at	4932438A13Rik	3	36.8174	7	30.1445	rs8261944	10.6787	0.496
1422564_at	Actl6b	5	138.008	13	54.8887	rs13481817	11.4532	0.497
1427286_at	Hrnbp3	11	118.358	2	26.1904	rs3681655	11.7514	0.497
1428164_at	Nudt9	5	104.491	11	79.3634	rs13481119	11.5158	0.497
1449474_a_at	Nelf	2	24.9178	15	88.2986	rs13482695	11.8126	0.497
1421895_at	Eif2s3x	X	91.4358	10	123.018	rs6282839	10.8269	0.498
1425274_at	Asph	4	9.5489	1	23.0993	rs6316488	11.1	0.498
1427470_s_at	Napb	2	148.522	11	58.0605	rs13481045	10.1136	0.498
1439005_x_at	Ywhaz	15	36.7014	X	69.2812	DXMit1	11.4441	0.498
1443805_at	MGC15476	7	17.4715	7	15.6199	rs6295100	11.9368	0.498
1415841_at	Dncic2	2	71.1008	X	69.2812	DXMit1	11.3541	0.499
1420670_at	Arnt2	7	91.3973	19	44.2447	rs13483639	11.8369	0.499
1424821_at	Ndfip1	18	38.6243	7	114.49	rs13479470	11.9623	0.499
1441947_x_at	BC033915	9	46.0108	15	28.443	rs13482498	11.4955	0.499
1456054_a_at	Pum1	4	130.336	11	58.0605	rs13481045	11.3539	0.499
1421375_a_at	S100a6	3	90.4177	18	73.9701	rs13483437	11.4988	0.5
1423493_a_at	Nfix	8	87.2504	15	45.1075	rs13482547	11.4941	0.5
1424132_at	Hras1	7	148.377	15	88.2986	rs13482695	11.1047	0.5
1426403_at	Actr1b	1	36.7551	15	88.2986	rs13482695	11.5483	0.5
1436535_at	Ssa2	1	145.6	7	30.1445	rs8261944	11.11	0.5
1454045_a_at	Pgs1	11	117.885	13	52.7833	rs6209128	11.6927	0.5
1418101_a_at	Rtn3	19	7.50044	7	136.447	rs6159179	10.4754	0.501
1433539_at	Commd3	2	18.5963	4	49.7924	rs13477695	11.1496	0.501
1416364_at	Hsp90ab1	17	45.7049	X	156.93	gnfX.141.820	11.6381	0.502
1420948_s_at	Atrx	X	102.995	16	63.7153	rs4151935	11.3065	0.502
1423908_at	Ndufs8	19	3.91091	9	35.7354	rs3665911	11.0841	0.502
1428161_a_at	Chchd2	5	130.357	17	83.3066	rs6263123	11.6288	0.502
1459835_s_at	Dnaja1	4	40.6808	7	114.49	rs13479470	11.4412	0.502
1423038_at	Stx6	1	157.05	15	28.443	rs13482498	11.0541	0.503
1431110_at	5430431D22Rik	2	16.677	16	67.8069	rs3695481	11.4627	0.503
1434887_at	Freq	2	31.1504	7	35.0486	rs13479188	11.7534	0.503
1435715_x_at	Tdg	10	82.1127	15	88.2986	rs13482695	11.4063	0.503
1425194_a_at	6330577E15Rik	19	47.8095	11	35.5312	D11Mit231	11.3906	0.504
1451324_s_at	Fyttd1	16	32.9076	16	76.5402	rs4206648	11.8026	0.504
1460341_at	Plekhb2	1	34.9359	18	70.9106	gnf18.069.064	11.0907	0.504
1460717_at	Tspyl1	10	34.003	11	4.40873	rs3659787	11.2988	0.504
1426823_s_at	Psme4	11	30.78	9	69.7615	rs6355445	11.587	0.505
1433848_at	Cdc27	11	104.365	3	3.77107	rs13476950	11.6247	0.505
1442489_at	Hrb	1	82.8774	5	41.8195	rs3662682	10.6114	0.505
1443749_x_at	Slc1a3	15	8.5849	15	88.2986	rs13482695	11.3155	0.505
1449107_at	Nudt4	10	95.0119	10	123.018	rs6282839	10.6731	0.505
1451080_at	Usp1	4	98.6017	7	44.7592	rs6228386	11.0606	0.505
1454633_at	Etnk1	6	143.155	19	38.9008	rs6185741	11.4899	0.505
1435148_at	Atp1b2	11	69.4133	15	88.2986	rs13482695	11.1613	0.506
1437278_a_at	Sae2	7	34.9257	3	142.572	rs6290401	11.2148	0.506
1428240_at	Nrxn1	17	90.4589	11	67.1951	rs3715924	11.7284	0.507
1455361_at	Dgkb	12	39.3604	14	118.847	rs6265743	11.3051	0.507
1460308_a_at	Ict1	11	115.271	2	128.065	rs6411422	11.4907	0.507
1423369_at	Fmr1	X	65.9702	2	26.6999	mCV23574676	11.7593	0.508
1438554_x_at	Wbscr1	5	135.096	X	156.93	gnfX.141.820	11.6969	0.508
1450396_at	Stag2	X	39.6193	7	40.3789	rs6206014	11.4328	0.508
1424054_at	Btbd2	10	80.1055	15	88.2986	rs13482695	11.6516	0.509
1430151_at	Nisch	14	32.0151	3	54.3657	gnf03.051.000	11.3158	0.509
1456072_at	Ppp1r9a	6	5.11449	5	132.412	D5Mit372	11.7644	0.509
1418738_at	Scn1b	7	31.9016	7	24.6467	rs13479153	11.2163	0.51
1421252_a_at	Mef2a	7	74.3771	16	69.6854	rs4199265	11.6447	0.51
1426931_s_at	D19Bwg1357e	19	27.4708	2	113.889	rs13476709	11.044	0.51
1427838_at	Bphl	13	34.1662	16	12.3864	rs4162800	11.3246	0.51
1433871_at	R3hdm	1	130.134	15	88.2986	rs13482695	11.5588	0.51
1452883_a_at	2310002J21Rik	19	54.0057	18	70.9106	gnf18.069.064	11.9198	0.51
1416767_a_at	1110003E01Rik	5	65.8411	18	70.9106	gnf18.069.064	11.4797	0.511
1418887_a_at	D11Wsu99e	11	113.523	13	69.04	rs13481861	11.3328	0.511
1420809_a_at	Chp	2	119.412	13	22.4064	rs13481728	11.3174	0.511
1423589_at	Arpc4	6	113.339	13	54.8887	rs13481817	11.1275	0.511
1429058_at	1110004B13Rik	11	68.8859	19	38.9008	rs6185741	11.1602	0.511
1434755_at	Coro2b	9	62.2674	15	45.1075	rs13482547	11.0345	0.511
1442880_at	Immt	16	34.5598	15	88.2986	rs13482695	11.9052	0.511
1451977_at	Dyrk1a	16	94.9136	9	81.6566	rs3673457	11.1696	0.511
1415873_a_at	Actr1a	19	46.4514	7	24.6467	rs13479153	11.5284	0.512
1426460_a_at	Ugp2	11	21.2216	11	20.8533	rs3023251	11.0485	0.512
1428572_at	Basp1	15	25.2933	19	11.1632	rs3700209	11.2755	0.512
1435320_at	D2Ertd485e	2	121.837	7	26.7766	rs13479163	10.9493	0.512
1417932_at	Il18	9	50.3874	8	121.267	gnf08.119.598	11.1526	0.513
1434900_at	Mkl1	15	80.843	7	15.6199	rs6295100	11.1884	0.513
1440818_s_at	Sf3b1	1	55.0439	11	4.40873	rs3659787	10.6568	0.513
1418775_at	Bles03	19	5.42677	11	79.3634	rs13481119	11.6455	0.514
1424619_at	Sf3b4	3	95.9807	17	3.75103	rs13482842	11.5631	0.514
1431993_a_at	Rnf38	4	44.1423	16	12.3864	rs4162800	11.2973	0.514
1455345_at	Phf15	11	51.627	18	70.9106	gnf18.069.064	11.526	0.514
1423781_at	Appbp1	8	107.037	15	28.9905	rs3702361	11.2716	0.515
1425543_s_at	Plekha5	6	140.545	5	133.347	rs13478539	11.0983	0.515
1439901_at	BQ129438	Un	0	5	132.412	D5Mit372	10.8989	0.515
1420629_a_at	Dnaja3	16	4.69975	15	88.2986	rs13482695	10.7771	0.516
1426226_at	Dyrk1a	16	94.9146	11	20.8533	rs3023251	10.9009	0.516
1441608_at	F830001A07Rik	5	15.533	3	77.9986	rs3672300	10.8485	0.516
1451017_at	Sdbcag84	2	155.843	14	118.847	rs6265743	11.6687	0.516
1416267_at	Scoc	8	85.9586	7	115.203	mCV24779699	11.2297	0.517
1417672_at	Slc4a10	2	62.1643	9	69.7615	rs6355445	11.5116	0.517
1425331_at	Zfp106	2	120.335	8	121.267	gnf08.119.598	11.4263	0.517
1427275_at	Smc4l1	3	68.8206	11	58.0605	rs13481045	11.0057	0.517
1456196_x_at	Fkbp1a	2	151.387	17	83.3066	rs6263123	11.3208	0.517
1460547_a_at	Hnrpk	13	58.4926	15	28.9905	rs3702361	11.2928	0.517
1422475_a_at	Rps3a	3	85.9425	10	30.6956	rs13480570	11.174	0.518
1444141_at	Snx13	12	35.7914	19	38.9008	rs6185741	11.0892	0.518
1423630_at	Cygb	11	116.508	15	82.9422	rs13482677	11.3612	0.519
1429779_at	Eif2c4	4	126.17	X	159.857	rs3657281	10.7022	0.519
1435784_at	Apg9l1	1	75.1775	16	12.3864	rs4162800	11.5066	0.519
1451159_at	Arhgef12	9	42.7724	18	70.9106	gnf18.069.064	11.7009	0.519
1421271_at	Sh3md2	8	63.8737	4	100.928	rs13477873	11.4577	0.52
1438695_at	Ube3a	7	66.5664	6	95.039	rs13478906	11.6254	0.52
1441771_at	Atrx	X	103.045	4	44.3385	gnf04.041.337	10.7755	0.52
1451143_at	Fam98c	7	29.9383	15	45.1075	rs13482547	11.5632	0.52
1455271_at	LOC620695	2	93.796	15	92.8372	rs13482715	11.9459	0.52
1423518_at	Csk	9	57.4748	15	87.9268	rs3707587	11.5008	0.521
1424461_at	Dctn2	10	126.715	15	88.2986	rs13482695	11.22	0.521
1415680_at	Anapc1	2	128.438	16	67.8069	rs3695481	10.9741	0.522
1426493_a_at	Kifc2	15	76.4979	13	54.8887	rs13481817	11.3293	0.522
1428475_at	1190005P17Rik	10	119.665	19	44.2447	rs13483639	11.6791	0.522
1450849_at	Hnrpu	1	180.261	10	122.416	rs13480802	11.0108	0.522
1452820_at	Brwd2	7	136.779	15	88.2986	rs13482695	11.5301	0.522
1428779_at	Zbtb41	1	141.349	2	26.1904	rs3681655	11.2693	0.523
1439304_at	Pam	1	99.9424	4	44.3385	gnf04.041.337	11.5726	0.523
1443127_at	Grid2	6	63.5899	3	54.3657	gnf03.051.000	11.2167	0.523
1450028_a_at	Lancl2	6	57.6891	15	45.1075	rs13482547	11.2194	0.523
1450052_at	Kif2a	13	68.6129	16	63.7153	rs4151935	11.3813	0.523
1452970_at	Zfp198	14	57.5786	6	95.039	rs13478906	11.8155	0.523
1420502_at	Sat1	X	151.648	19	44.2447	rs13483639	11.2286	0.524
1421340_at	Map3k5	10	19.8568	3	3.77107	rs13476950	10.8735	0.524
1425213_at	6430514L14Rik	9	69.9383	4	49.7924	rs13477695	11.3448	0.524
1428693_at	2610044O15Rik	17	95.2262	17	86.6664	rs6336971	10.7981	0.524
1460086_at	MGC28728	2	37.2526	11	58.0605	rs13481045	11.4741	0.524
1416877_a_at	Mrpl51	6	125.143	X	128.95	rs13484003	11.3763	0.525
1433851_at	Ppp4r2	6	100.819	8	121.267	gnf08.119.598	11.3845	0.525
1416140_a_at	Dhx30	9	109.987	13	54.8887	rs13481817	11.2193	0.526
1424949_at	Huwe1	X	148.369	4	31.8934	rs6177140	11.5297	0.527
1434788_at	D930050A07Rik	14	65.8114	5	132.412	D5Mit372	11.6026	0.527
1419200_at	Fxyd7	7	31.8277	15	88.2986	rs13482695	11.5368	0.528
1423804_a_at	Idi1	13	8.89146	X	69.2812	DXMit1	11.1758	0.528
1435746_at	Srpk2	5	23.0106	7	30.1445	rs8261944	11.6742	0.528
1443905_at	A530058O07Rik	5	130.054	7	26.7766	rs13479163	10.7493	0.528
1448771_a_at	Fth1	19	10.0588	6	92.586	rs6223362	11.4862	0.528
1416313_at	Mllt11	3	95.0231	11	35.5312	D11Mit231	11.4687	0.529
1438291_x_at	Rpl37	15	5.06856	19	44.2447	rs13483639	11.6392	0.529
1416089_at	Rps15	10	79.7556	10	28.1392	rs6391751	11.074	0.53
1423094_at	Crbn	6	106.731	7	44.7592	rs6228386	11.1683	0.53
1423883_at	Acsl1	8	47.6208	15	45.1075	rs13482547	11.3414	0.53
1439253_x_at	Prelid1	13	55.4265	9	34.3263	rs6258765	11.3316	0.53
1451897_a_at	Nbr1	11	101.438	14	88.3589	UT_9_81.82101	11.2819	0.53
1419829_a_at	Gab2	7	104.456	2	26.1904	rs3681655	11.0464	0.531
1442109_at	Fubp1	3	151.894	7	30.1445	rs8261944	11.0216	0.531
1448430_a_at	Naca	10	127.484	9	10.5349	mCV25073238	11.1258	0.531
1417981_at	Insig2	1	123.201	16	12.3864	rs4162800	11.3151	0.532
1435382_at	Ndn	7	69.4946	15	28.9905	rs3702361	11.1803	0.532
1436868_at	Rtn4rl1	11	75.0799	13	54.8887	rs13481817	11.3653	0.532
1436902_x_at	Tmsb10	6	72.9075	6	95.039	rs13478906	11.3078	0.532
1415819_a_at	Ppp2r1a	17	21.0996	X	156.93	gnfX.141.820	11.3564	0.533
1424871_s_at	Fam100a	16	4.87502	13	52.7833	rs6209128	11.1185	0.533
1436624_at	Dnm3	1	163.918	5	132.412	D5Mit372	11.3937	0.533
1417747_at	Cplx1	5	108.949	9	69.7615	rs6355445	10.4913	0.534
1423687_a_at	Man2c1	9	56.9899	15	88.2986	rs13482695	11.1888	0.534
1426010_a_at	Epb4.1l3	17	69.6352	5	126.432	rs3711495	10.8137	0.534
1429625_at	Cdkl5	X	157.24	2	26.6999	mCV23574676	10.9606	0.534
1435259_s_at	D2Ertd217e	2	25.4757	1	45.4539	rs6370110	11.36	0.534
1447992_s_at	Pcsk2	2	143.642	15	79.5	rs4230869	10.7995	0.534
1450151_at	Zfp316	5	144.014	6	95.039	rs13478906	10.9871	0.534
1452333_at	Smarca2	19	26.785	15	28.443	rs13482498	10.9345	0.534
1416924_at	Bri3	5	145.017	6	95.039	rs13478906	11.5463	0.535
1443589_at	Gpm6b	X	162.693	11	58.0605	rs13481045	11.6605	0.535
1452149_at	Ube3b	5	114.871	7	15.6199	rs6295100	11.374	0.535
1454849_x_at	Clu	14	66.6002	1	126.447	rs6189020	11.4008	0.535
1416835_s_at	Amd1	10	35.4304	6	95.039	rs13478906	11.431	0.536
1423603_at	Zfpm1	8	124.86	13	54.8887	rs13481817	11.225	0.536
1427432_a_at	Sfrs10	16	22.246	2	30.263	rs13476408	11.4941	0.536
1430529_at	Csnk1a1	18	61.7173	1	79.6852	D1Mit216	11.1322	0.536
1434526_at	Abhd7	5	107.856	18	70.9106	gnf18.069.064	11.439	0.536
1438511_a_at	1190002H23Rik	14	79.6886	X	69.2812	DXMit1	11.0223	0.536
1443830_x_at	Rnf103	6	71.4607	16	12.3864	rs4162800	11.1453	0.536
1448427_at	Ndufa6	15	82.1807	11	79.3634	rs13481119	10.9818	0.536
1435851_at	Lgi1	19	38.3829	5	132.412	D5Mit372	11.7477	0.537
1438401_at	Ubn1	16	5.05518	11	58.0605	rs13481045	11.179	0.537
1443849_x_at	Urod	4	116.663	13	71.4696	rs13481870	9.94824	0.537
1445359_at	Adcy1	11	7.07379	19	44.2447	rs13483639	11.1322	0.537
1447544_at	Mmp28	11	83.2534	7	24.6467	rs13479153	11.2273	0.537
1455390_at	Alkbh6	7	31.0974	2	131.545	rs4223510	10.711	0.537
1451943_a_at	Ppm1a	12	73.8852	16	12.3864	rs4162800	11.3135	0.538
1417792_at	Zfml	6	83.927	19	38.9008	rs6185741	11.4645	0.539
1433825_at	Ntrk3	7	85.4458	5	132.412	D5Mit372	11.3758	0.539
1428277_at	Otud6b	4	14.7373	2	30.263	rs13476408	11.1649	0.541
1436906_at	Rnf116	8	124.991	7	34.4076	rs6239372	11.3518	0.541
1450020_at	Cx3cr1	9	119.958	11	58.0605	rs13481045	11.6635	0.541
1431411_a_at	Rai12	11	69.782	16	12.3864	rs4162800	10.915	0.542
1445473_at	Diras2	13	52.6026	19	38.9008	rs6185741	10.9181	0.542
1425616_a_at	Ccdc23	4	118.869	8	121.267	gnf08.119.598	11.2857	0.543
1430144_at	5830411G16Rik	6	56.7073	16	84.9707	rs4212088	11.04	0.543
1423060_at	Pa2g4	10	127.997	15	88.2986	rs13482695	11.0713	0.544
1448500_a_at	2810038K19Rik	2	181.118	13	52.7833	rs6209128	11.38	0.544
1425176_at	C1ql3	2	12.9257	16	12.3864	rs4162800	10.7301	0.545
1433540_x_at	Ppp1cb	5	32.7948	7	114.49	rs13479470	11.4582	0.545
1436292_a_at	Oaz1	10	80.2918	17	83.3066	rs6263123	11.4416	0.545
1436989_s_at	Slc12a6	2	112.203	16	12.3864	rs4162800	11.4513	0.545
1438560_x_at	Cct4	11	22.9032	X	69.2812	DXMit1	10.6885	0.545
1441567_at	D130076G13Rik	9	59.7293	4	44.3385	gnf04.041.337	10.6074	0.545
1452692_a_at	Ndufv2	17	66.4288	5	126.432	rs3711495	11.1377	0.545
1460724_at	Ap2a1	7	52.1559	7	15.6199	rs6295100	11.5223	0.545
1416479_a_at	Tmem14c	13	41.1165	4	44.3385	gnf04.041.337	10.9456	0.546
1420037_at	Atp5a1	18	78.0213	10	123.018	rs6282839	10.503	0.547
1421071_at	Vhlh	6	113.58	11	4.40873	rs3659787	10.5574	0.547
1425848_a_at	Dusp26	8	32.2071	X	156.93	gnfX.141.820	11.1763	0.547
1434860_at	Narg3	4	11.1885	15	45.1075	rs13482547	11.2219	0.547
1441682_s_at	Xpot	10	121.024	2	26.6999	mCV23574676	11.274	0.547
1460449_at	Anks1b	10	90.434	7	114.49	rs13479470	11.1865	0.547
1433643_at	Cacna2d1	5	15.8798	18	73.9701	rs13483437	11.1579	0.548
1421052_a_at	Sms	X	102.337	3	157.455	rs13477515	11.1802	0.549
1433604_x_at	Aldoa	7	133.939	6	95.039	rs13478906	10.7196	0.549
1436405_at	Dock4	12	41.573	3	141.979	rs3090379	11.6015	0.549
1447447_s_at	Srrm1	4	134.876	15	45.1075	rs13482547	10.7748	0.549
1455409_at	Spire1	18	67.648	5	132.412	D5Mit372	11.0638	0.549
1415950_a_at	Pbp	5	117.733	19	10.819	D19Mit22	10.1773	0.55
1417715_a_at	Got2	8	98.3881	7	24.6467	rs13479153	10.8799	0.55
1441992_at	Rab14	2	35.0516	4	44.3385	gnf04.041.337	10.9798	0.55
1450386_at	Kpna3	14	61.9844	16	63.7153	rs4151935	11.4381	0.55
1456377_x_at	Limd2	11	106.019	14	71.699	rs13482251	10.8078	0.55
1434499_a_at	Ldh2	6	142.439	16	63.7153	rs4151935	11.3122	0.551
1435977_at	Hdgfrp3	7	89.0262	17	11.894	rs13482876	10.8866	0.551
1435984_at	1110033F14Rik	17	23.3201	4	49.7924	rs13477695	10.6751	0.551
1439405_x_at	Becn1	11	101.15	10	122.416	rs13480802	10.4319	0.551
1453365_at	8430421H08Rik	1	162.154	19	38.9008	rs6185741	10.9905	0.551
1419981_at	Riok3	18	12.3147	11	22.9284	rs6283329	10.9072	0.552
1428150_at	Coro7	16	4.62872	7	15.6199	rs6295100	11.6253	0.552
1434290_at	Gtdc1	2	44.42	15	88.2986	rs13482695	10.9388	0.552
1437689_x_at	Clu	14	66.6003	9	34.3263	rs6258765	11.3377	0.552
1447624_s_at	Stox2	8	48.2656	15	88.2986	rs13482695	11.2259	0.552
1448632_at	Psmb10	8	108.46	13	71.4696	rs13481870	10.4755	0.552
1451466_at	D16Ertd472e	16	78.5438	3	157.455	rs13477515	10.9996	0.552
1455896_a_at	Kcnk1	8	128.549	6	124.022	gnf06.122.747	11.0184	0.552
1422302_s_at	Ftl1	7	52.7135	9	59.7854	rs6224703	11.1223	0.553
1428772_at	Tbk1	10	121.025	12	115.998	rs6376011	10.9633	0.553
1436377_at	Gpr137	19	7.01269	15	88.2986	rs13482695	10.9938	0.553
1437052_s_at	Slc2a3	6	122.678	9	69.7615	rs6355445	10.5376	0.553
1438452_at	Nebl	2	17.2657	2	26.6999	mCV23574676	10.6472	0.553
1419913_at	Strap	6	137.7	5	78.9931	CEL-5_76676351	11.3136	0.554
1422589_at	Rab3a	8	73.2821	14	118.847	rs6265743	10.7738	0.554
1427344_s_at	Rasd2	8	77.7476	13	54.8887	rs13481817	11.3637	0.554
1440207_at	Agpat7	2	112.086	15	45.1075	rs13482547	11.2956	0.554
1454602_s_at	Cnot2	10	115.923	2	26.6999	mCV23574676	11.0075	0.554
1423559_at	Kcnc1	7	53.683	16	26.9781	rs4165503	11.3155	0.555
1436895_at	Centd1	5	63.0979	11	58.0605	rs13481045	11.0575	0.555
1416473_a_at	Nope	9	64.9856	2	26.6999	mCV23574676	11.0326	0.556
1431064_at	Dpp8	9	64.9265	10	122.416	rs13480802	10.9356	0.556
1454705_at	Fam91a1	15	58.2887	11	79.3634	rs13481119	10.9283	0.556
1437711_x_at	Odc1	12	17.5577	7	115.203	mCV24779699	10.7762	0.557
1428134_at	Coq9	8	97.3782	16	69.1723	rs4199044	10.8838	0.558
1435413_x_at	2700060E02Rik	14	20.6312	6	64.7458	rs13478800	10.6285	0.558
1439184_s_at	Txnl5	11	72.0232	19	44.2447	rs13483639	11.2654	0.558
1448233_at	Prnp	2	131.764	3	154.259	rs3716135	10.7668	0.558
1459764_x_at	Snx10	6	51.515	1	23.0993	rs6316488	10.7495	0.558
1434985_a_at	Eif4a1	11	69.4805	7	114.49	rs13479470	11.1827	0.559
1423898_a_at	Trip12	1	84.721	2	26.6999	mCV23574676	11.5779	0.56
1451369_at	Commd5	15	76.7311	9	59.7854	rs6224703	11.23	0.56
1459008_at	Pcdhga6	11	102.374	4	49.7924	rs13477695	11.256	0.56
1460304_a_at	Ubtf	11	102.172	15	28.9905	rs3702361	10.8413	0.56
1435522_a_at	2310016E02Rik	5	31.209	1	45.4539	rs6370110	11.3536	0.561
1449055_x_at	Pcbp4	9	106.366	7	24.6467	rs13479153	11.1955	0.561
1453140_at	9030612M13Rik	17	32.9082	X	156.93	gnfX.141.820	10.8882	0.561
1457264_at	Phf20l1	15	66.4552	4	44.3385	gnf04.041.337	11.1632	0.561
1425615_a_at	Pck2	14	56.1671	15	88.2986	rs13482695	11.3466	0.562
1430111_a_at	Bcat1	6	144.953	16	12.3864	rs4162800	11.0553	0.562
1448373_at	Mrpl18	17	13.1067	16	67.8069	rs3695481	10.9632	0.562
1422614_s_at	Bloc1s1	10	128.357	11	79.0684	rs13481117	11.0882	0.563
1436297_a_at	Grina	15	76.0801	16	63.7153	rs4151935	11.3793	0.563
1416603_at	Rpl22	4	151.701	19	11.1632	rs3700209	11.0592	0.564
1420139_s_at	Krr1	10	111.423	15	79.5	rs4230869	10.9699	0.564
1425346_at	Zfp318	17	46.5503	6	112.817	rs13478978	10.6548	0.564
1435308_at	AU067636	4	25.5366	7	34.4076	rs6239372	11.0815	0.564
1440104_at	Ranbp2	10	57.9233	4	44.3385	gnf04.041.337	11.1911	0.564
1447341_at	Chr2syt	12	117.613	2	144.973	rs3022909	10.7325	0.564
1458742_at	Lphn3	5	82.2298	4	31.8934	rs6177140	11.0826	0.564
1416392_a_at	Atp6v0c	17	24.301	6	92.586	rs6223362	10.881	0.565
1418996_a_at	4930469P12Rik	6	145.165	13	52.7833	rs6209128	11.4191	0.565
1419451_at	Fzr1	10	80.8303	7	24.6467	rs13479153	11.0418	0.565
1422119_at	Rab5b	10	128.117	16	12.3864	rs4162800	11.112	0.565
1429839_a_at	Yaf2	15	93.1147	18	70.9106	gnf18.069.064	10.8351	0.565
1442029_at	Kcnq1	7	150.429	5	41.8195	rs3662682	10.4365	0.565
1450061_at	Enc1	13	98.0224	16	12.3864	rs4162800	11.1806	0.565
1454925_x_at	Mdh1	11	21.4573	3	156.672	rs13477511	9.28648	0.565
1455928_x_at	Lztr1	16	17.5263	7	109.771	rs3686975	11.0946	0.565
1426390_a_at	Arf1	11	59.025	3	157.075	gnf03.160.599	10.8871	0.566
1436306_at	Saps1	7	4.5837	7	15.6199	rs6295100	11.7256	0.566
1448285_at	Rgs4	1	171.674	19	38.9008	rs6185741	11.0424	0.566
1455266_at	Kif5c	2	49.6298	15	79.7434	rs4230879	10.643	0.566
1431932_s_at	Trim44	2	102.144	11	75.2856	gnf11.079.978	10.968	0.567
1433504_at	Pygb	2	150.657	15	88.2986	rs13482695	11.0866	0.567
1441944_s_at	Gpr135	12	73.169	2	26.1904	rs3681655	10.8278	0.567
1417524_at	Cnih2	19	5.09313	15	88.2986	rs13482695	10.9856	0.568
1422009_at	Atp1b2	11	69.4148	5	126.432	rs3711495	11.2284	0.568
1455012_s_at	Trim37	11	87.0328	18	73.9701	rs13483437	10.8675	0.568
1422486_a_at	Smad4	18	73.7985	5	132.412	D5Mit372	11.4246	0.569
1433980_at	Htatip	19	5.60351	15	86.4349	rs13482689	11.3346	0.569
1459475_at	D10Ertd761e	10	81.6849	11	58.0605	rs13481045	10.6966	0.569
1416183_a_at	Ldh2	6	142.439	6	127.404	rs13479023	10.9435	0.57
1422677_at	Dgat2	7	106.303	15	86.4349	rs13482689	11.1634	0.57
1426756_at	Galnt2	8	126.867	16	34.2281	rs4171932	11.2158	0.57
1447774_x_at	5730469M10Rik	14	41.8071	4	100.928	rs13477873	10.9902	0.57
1435246_at	Paqr8	1	20.9269	16	12.3864	rs4162800	10.8666	0.571
1437044_a_at	Gba	3	89.0125	2	26.1904	rs3681655	10.9516	0.571
1453787_at	Txndc13	2	134.424	3	3.77107	rs13476950	10.3952	0.571
1454939_at	Phf20l1	15	66.4426	11	8.73673	rs3714397	10.4423	0.571
1416522_a_at	Grcc10	6	124.689	14	118.847	rs6265743	10.9377	0.572
1417708_at	Syt3	7	51.6514	7	30.1445	rs8261944	10.7832	0.572
1421267_a_at	Cited2	10	17.4439	16	12.3864	rs4162800	11.3315	0.572
1428370_at	1500011B03Rik	5	115.259	2	26.6999	mCV23574676	11.0416	0.572
1417029_a_at	Trim2	3	83.9944	16	67.8069	rs3695481	10.9504	0.573
1428097_at	2510009E07Rik	16	21.6492	15	86.4349	rs13482689	11.168	0.573
1450864_at	Calm3	7	17.5025	1	22.1536	mCV23695025	10.7794	0.573
1425833_a_at	Hpca	4	128.79	15	88.2986	rs13482695	10.8205	0.574
1434035_at	Cyyr1	16	85.5524	7	114.49	rs13479470	10.9749	0.575
1438637_x_at	Sf3b2	19	5.27396	17	83.3066	rs6263123	10.4528	0.575
1433475_a_at	Ahcp	13	46.7732	16	12.3864	rs4162800	11.113	0.576
1448992_at	Ina	19	47.0983	5	132.412	D5Mit372	11.0963	0.576
1450747_at	Keap1	9	21.0381	2	26.1904	rs3681655	10.9263	0.576
1415880_a_at	Lamp1	8	13.1748	11	79.3634	rs13481119	11.159	0.577
1425698_a_at	Zf	7	97.5923	4	62.1936	rs3690581	11.2309	0.577
1431145_a_at	Cuedc2	19	46.4052	1	128.996	rs6263067	10.288	0.577
1438673_at	Slc4a7	14	15.6317	10	116.749	rs13480778	10.7548	0.577
1439462_x_at	Tmed10p	13	36.0821	18	70.9106	gnf18.069.064	10.3539	0.577
1445259_at	Scn2a2	2	65.5204	15	95.7777	rs13482726	11.2389	0.577
1447693_s_at	Neo1	9	58.7227	2	26.1904	rs3681655	11.0727	0.577
1416420_a_at	Rpl9	5	93.4331	17	83.3066	rs6263123	11.2765	0.578
1417959_at	Pdlim7	13	55.6082	15	88.2986	rs13482695	10.9308	0.578
1418525_at	Pcm1	8	42.418	19	47.1974	rs13483649	10.9743	0.578
1424379_at	Car11	7	52.9585	11	79.3634	rs13481119	10.7657	0.578
1429330_at	Gabra4	5	71.9626	7	45.4563	rs13479226	11.1839	0.578
1435790_at	Olfm2	9	20.4722	15	45.1075	rs13482547	10.8776	0.578
1449956_at	Prkce	17	87.0193	1	60.5887	rs13475885	10.4695	0.578
1448842_at	Cdo1	18	46.8732	4	49.7924	rs13477695	10.4897	0.579
1451002_at	Aco2	15	81.7447	4	108.705	gnf04.104.549	10.9502	0.579
1451370_at	Rmrp1	4	43.5081	15	88.2986	rs13482695	10.8798	0.579
1419256_at	Spnb2	11	30.0139	16	12.3864	rs4162800	10.5987	0.58
1428607_at	Araf	X	20.4294	18	70.5928	rs13483427	10.1556	0.58
1420113_s_at	2410022L05Rik	8	13.8848	19	44.2447	rs13483639	10.8868	0.581
1429735_at	1110003F05Rik	17	10.3978	4	44.3385	gnf04.041.337	10.8452	0.581
1424657_at	Taok1	11	77.3512	7	30.1445	rs8261944	10.8121	0.582
1440286_at	Fbxl16	17	25.9577	13	54.8887	rs13481817	11.3087	0.582
1455799_at	Rorb	19	19.0113	4	44.3385	gnf04.041.337	11.0048	0.582
1415928_a_at	Map1lc3b	8	124.122	X	69.2812	DXMit1	11.2276	0.583
1429940_at	Cdc73	1	145.446	17	3.75103	rs13482842	10.8048	0.583
1446957_s_at	BC004022	8	89.3683	11	58.0605	rs13481045	10.8681	0.583
1415926_at	Nup62	7	52.0856	15	45.1075	rs13482547	10.9834	0.584
1416463_at	Gpiap1	2	103.605	18	40.07	rs13483314	10.6381	0.584
1447905_x_at	Nup62	7	52.0861	2	26.6999	mCV23574676	10.9515	0.584
1418022_at	Narg1	3	51.2774	9	34.3263	rs6258765	10.5856	0.585
1438580_at	4930572I07Rik	4	44.9244	5	127.857	rs3663155	10.9952	0.585
1450039_at	Usp9x	X	12.7425	14	118.847	rs6265743	10.7566	0.585
1456108_x_at	Zfp179	11	61.262	17	83.3066	rs6263123	10.6542	0.585
1417087_at	Glg1	8	113.679	16	78.0159	rs4207980	10.6168	0.586
1428457_at	5830472M02Rik	2	163.444	6	95.039	rs13478906	10.8879	0.586
1429254_at	Aqp11	7	104.878	10	30.6956	rs13480570	11.0205	0.586
1451428_x_at	Egfl7	2	26.4477	2	26.6999	mCV23574676	10.4722	0.586
1452716_at	5730469M10Rik	14	41.8072	18	70.9106	gnf18.069.064	11.0349	0.586
1427089_at	Ccnt2	1	129.702	16	67.8069	rs3695481	10.1604	0.587
1429246_a_at	Anxa6	11	54.8049	13	62.9702	rs13481845	10.7371	0.587
1434150_a_at	Mettl7a	15	100.192	18	73.9701	rs13483437	11.144	0.587
1435464_at	1110003E01Rik	5	65.8381	6	95.039	rs13478906	11.0259	0.587
1437183_at	Lrrc4b	7	51.7174	16	12.3864	rs4162800	11.1467	0.587
1450105_at	Adam10	9	70.6266	16	63.7153	rs4151935	10.8886	0.587
[truncated: 187 more rows]
