# Supplementary material for: Genetic Dissection of Acute Ethanol Responsive Gene Networks in Prefrontal Cortex: Functional and Mechanistic Implications
Source: PLoS One. 2012 Apr 12;7(4):e33575. doi: 10.1371/journal.pone.0033575 (PMC3325236; doi:10.1371/journal.pone.0033575)
Supplement: Table S7 — Functional analysis of PFC paraclique networks. Data is from ToppGene functional over-representation analysis of paraclique networks. (XLS) [file pone.0033575.s014.xls]

## Sheet: PFC Networks
Table S7: Functional Over-Representation Analysis of PFC Paraclique Networks
Network	Analysis	ID	Name	FDR p-value	Genes in query	Genes in term	Gene Symbols
1	GeneOntologyCellularComponent	GO:0044456	synapse part	3.08112e-09	32	270	DLGAP4, CHRM1, RPH3A, NLGN1, ADORA1, MT3, FAIM2, LIN7B, SVOP, GIPC1, BIN1, SYT7, GABRA4, GABBR1, KCND2, NRXN2, SYNPO, NLGN2, DLGAP3, CABP1, VAMP2, SYT3, SYPL1, SYT5, ERC2, SYN1, SYP, RAB3A, SEMA4F, GRIN1, GRIK5, GRM1
1	GeneOntologyCellularComponent	GO:0030425	dendrite	8.55553e-09	25	182	CHRM1, SOD1, ADORA1, ADRBK1, MAPK1, PRKCG, CPLX1, FBXO2, CLCN2, GIPC1, CHL1, ATP1A2, TNK2, THY1, DBN1, KCND2, SYNPO, ILK, CAPRIN1, DLGAP3, DVL1, NCDN, PTPRK, GRIN1, GRM1
1	GeneFamily	RNF	RING-type zinc fingers	1.19703e-07	16	209	RNF10, DTX3, MARCH2, TRIM28, NEURL, RNF208, RING1, TRIM27, RNF2, RNF19B, MARCH6, RNF11, MARCH7, RNF103, TRIM3, RNF112
1	GeneOntologyMolecularFunction	GO:0003924	GTPase activity	1.50283e-07	26	219	HRAS, RAB11A, RAB14, ATL2, ARF5, ARHGAP5, RHOB, RND2, RAP2C, TUBB2C, TUBB4, TUBB3, GNG4, GNB2, GNA12, GNAI3, RHOQ, DNM1, RASD2, EEF1A2, ARL8A, RAB3A, GSPT1, EEF2, RNF112, AGAP3
1	GeneOntologyCellularComponent	GO:0019717	synaptosome	7.85203e-07	15	91	SNCB, PRKCG, LIN7B, HRH3, KCND2, RASGRF1, SEPT3, VAMP2, DVL1, ERC2, SYP, ENO2, RAB3A, SEMA4F, GRIN1
1	Interaction	122103	Affinity Capture-MS	1.36124e-06	5	6	GIPC1, PTP4A3, MLF2, PHB2, ILK
1	GeneOntologyCellularComponent	GO:0008021	synaptic vesicle	2.132e-06	14	86	RPH3A, MT3, SVOP, GIPC1, BIN1, SYT7, VAMP2, SYT3, SYPL1, SYT5, SYN1, SYP, RAB3A, GRIN1
1	GeneOntologyBiologicalProcess	GO:0007269	neurotransmitter secretion	2.3106e-06	14	85	RAB14, NLGN1, ADORA1, CPLX1, LIN7B, GIPC1, HRH3, NRXN2, PPFIA3, VAMP2, DVL1, SYN1, RAB3A, GRIK5
1	Pathway	PTENPATHWAY	PTENPATHWAY	2.86437e-06	7	18	MAPK1, AKT1, PDK2, PDPK1, FOXO3, ILK, PTEN
1	GeneOntologyBiologicalProcess	GO:0001505	regulation of neurotransmitter levels	3.07999e-06	17	125	ACHE, RAB14, NLGN1, ADORA1, CPLX1, LIN7B, GIPC1, HRH3, COMT, ATP1A2, NRXN2, PPFIA3, VAMP2, DVL1, SYN1, RAB3A, GRIK5
1	MousePheno	MP:0001468	abnormal temporal memory	6.04415e-06	15	89	JPH4, MAPK1, PRKCG, CLIP2, MAPT, MECP2, FZR1, ARX, NRGN, RASGRF1, GIT1, CACNB3, ENO2, GRIN1, GRM1
1	GeneOntologyBiologicalProcess	GO:0043576	regulation of respiratory gaseous exchange	8.88647e-06	6	15	NLGN1, ADORA1, MECP2, ATP1A2, NLGN2, GRIN1
1	MousePheno	MP:0000801	abnormal temporal lobe morphology	9.68288e-06	26	234	CHRM1, HPCA, PPARGC1A, YWHAE, MT3, CKMT1B, HIF1A, CHL1, MAPT, MECP2, ID4, ARX, ATP1A3, HGS, THRA, NUMBL, TOP2B, BRAF, GFAP, PCMT1, PTEN, SYN1, NCDN, ENO2, NFIX, BRSK1
1	GeneOntologyCellularComponent	GO:0043197	dendritic spine	1.76771e-05	9	43	ADRBK1, FBXO2, GIPC1, ATP1A2, KCND2, SYNPO, DLGAP3, GRIN1, GRM1
1	GeneOntologyBiologicalProcess	GO:0044065	regulation of respiratory system process	2.49437e-05	5	11	NLGN1, ADORA1, MECP2, ATP1A2, NLGN2
1	Pathway	hsa05213	Endometrial cancer	2.64331e-05	10	52	HRAS, MAP2K2, MAPK1, AKT1, PDPK1, FOXO3, BRAF, ILK, PTEN, ELK1
1	GeneOntologyBiologicalProcess	GO:0003016	respiratory system process	3.00002e-05	6	18	NLGN1, ADORA1, MECP2, ATP1A2, NLGN2, RAB3A
1	Pathway	P05734	Synaptic vesicle trafficking	3.41532e-05	7	25	SYT7, VAMP2, SYT3, SYT5, SYN1, SYP, RAB3A
1	GeneOntologyBiologicalProcess	GO:0048167	regulation of synaptic plasticity	4.4034e-05	11	70	HRAS, RAB11A, ADORA1, GIPC1, MECP2, DBN1, RASGRF1, PPFIA3, SYP, NCDN, GRIN1
1	GeneOntologyCellularComponent	GO:0045211	postsynaptic membrane	6.63567e-05	16	145	DLGAP4, CHRM1, NLGN1, ADORA1, FAIM2, LIN7B, GABRA4, GABBR1, SYNPO, NLGN2, DLGAP3, CABP1, SEMA4F, GRIN1, GRIK5, GRM1
1	GeneOntologyCellularComponent	GO:0030136	clathrin-coated vesicle	7.20996e-05	16	146	RPH3A, RAB14, MT3, AP2A1, SVOP, GIPC1, BIN1, SYT7, VAMP2, SYT3, SYPL1, SYT5, SYN1, SYP, RAB3A, GRIN1
1	GeneOntologyCellularComponent	GO:0030135	coated vesicle	7.55304e-05	18	178	RPH3A, RAB14, MT3, AP2A1, SVOP, GIPC1, BIN1, SYT7, PACSIN1, VAMP2, SYT3, SYPL1, SYT5, SYN1, SYP, SCYL1, RAB3A, GRIN1
1	GeneFamily	CORO	Coronins	0.000126435	3	7	CORO1A, CORO2B, CORO7
1	GeneOntologyCellularComponent	GO:0030672	synaptic vesicle membrane	0.000240669	8	47	RPH3A, SVOP, SYT7, VAMP2, SYT3, SYT5, SYN1, SYP
1	GeneOntologyCellularComponent	GO:0010008	endosome membrane	0.000262664	16	163	RAB11A, EPS15, MMGT1, MARCH2, VPS52, RHOB, HGS, CHMP1A, VPS4B, SYT5, APPL1, GGA3, ARL8A, LAMP1, SLC30A4, VPS37C
1	GeneFamily	MARCH	Membrane-associated ring fingers	0.000569325	3	11	MARCH2, MARCH6, MARCH7
2	GeneOntologyBiologicalProcess	GO:0006414	translational elongation	7.83762e-71	56	109	RPL23, RPL11, RPL10, RPL13, RPL17, RPL15, RPL19, RPL5, RPL13A, RPL35, UBA52, RPS6, RPS8, RPS7, RPL36, RPS12, RPS13, RPS10, RPS11, RPLP1, RPL31, RPL35A, RPL37, RPL37A, RPL38, RPL39, RPL41, RPL36A, RPL21, RPL23A, EIF5A, RPL22, RPL24, RPL27, RPL26, RPL27A, RPL30, RPL29, SRP14, RPS23, RPS24, RPS25, RPS26, RPS20, RPS21, RPS27, RPS27A, RPS28, RPS29, RPS15, RPS15A, RPS19, EEF1B2, RPS18, RPS16, RPS17
2	GeneOntologyCellularComponent	GO:0022626	cytosolic ribosome	5.48907e-61	46	81	RPL23, RPL11, RPL10, RPL13, RPL19, RPL5, RPL35, UBA52, RPS6, RPS8, RPS7, RPL36, RPS12, RPS13, RPS10, RPS11, RPLP1, RPL31, RPL37, RPL38, RPL39, RPL41, RPL21, RPL23A, RPL22, RPL24, RPL26, RPL27A, RPL30, RPL29, RPS23, RPS24, RPS25, RPS26, RPS20, RPS21, RPS27, RPS27A, RPS28, RPS29, RPS15, RPS15A, RPS19, RPS18, RPS16, RPS17
2	Pathway	hsa03010	Ribosome	5.44967e-60	52	102	RPL23, RPL11, RPL13, RPL17, RPL15, RPL19, MRPL13, RPL5, RPL13A, RPL35, UBA52, RPS6, RPS8, RPS7, RPS12, RPS13, RPS10, RPS11, RPLP1, RPL31, RPL35A, RPL36AL, RPL37, RPL37A, RPL38, RPL39, RPL41, RPL36A, RPL21, RPL23A, RPL24, RPL27, RPL26, RPL27A, RPL30, RPL29, RPL22L1, RPS23, RPS24, RPS25, RPS26, RPS20, RPS21, RPS27, RPS27A, RPS28, RPS29, RPS15, RPS15A, RPS19, RPS18, RPS16
2	GeneOntologyCellularComponent	GO:0033279	ribosomal subunit	2.79194e-58	52	131	RPL11, RPL10, RPL17, RPL19, MRPL13, RPL5, RPL13A, MRPL52, RPL35, MRPS18A, UBA52, RPS6, RPS8, RPS7, RPL36, RPS12, RPS13, RPS10, RPS11, RPLP1, MRPS24, RPL31, RPL37, RPL38, RPL39, RPL41, RPL21, RPL23A, RPL22, RPL24, RPL26, RPL27A, RPL30, RPL29, RPS23, RPS24, RPS25, RPS26, RPS20, RPS21, MRPL41, MRPS15, RPS27, RPS27A, RPS28, RPS29, RPS15, RPS15A, RPS19, RPS18, RPS16, RPS17
2	Pathway	RIBOSOMAL_PROTEINS	RIBOSOMAL_PROTEINS	1.21028e-53	49	106	RPL23, RPL11, RPL10, RPL13, RPL17, RPL15, RPL19, RPL5, RPL13A, RPL35, UBA52, RPS6, RPS8, RPS7, RPL36, RPS12, RPS13, RPS10, RPS11, RPLP1, RPL31, RPL35A, RPL37, RPL38, RPL39, RPL41, RPL21, RPL22, RPL24, RPL27, RPL26, RPL27A, RPL30, RPL29, RPS23, RPS24, RPS25, RPS26, RPS20, RPS21, RPS27, RPS27A, RPS28, RPS29, RPS15, RPS19, RPS18, RPS16, RPS17
2	GeneOntologyCellularComponent	GO:0022627	cytosolic small ribosomal subunit	9.74385e-34	24	38	UBA52, RPS6, RPS8, RPS7, RPS12, RPS13, RPS10, RPS11, RPS23, RPS24, RPS25, RPS26, RPS20, RPS21, RPS27, RPS27A, RPS28, RPS29, RPS15, RPS15A, RPS19, RPS18, RPS16, RPS17
2	GeneOntologyCellularComponent	GO:0015935	small ribosomal subunit	2.26393e-31	27	64	MRPS18A, UBA52, RPS6, RPS8, RPS7, RPS12, RPS13, RPS10, RPS11, MRPS24, RPS23, RPS24, RPS25, RPS26, RPS20, RPS21, MRPS15, RPS27, RPS27A, RPS28, RPS29, RPS15, RPS15A, RPS19, RPS18, RPS16, RPS17
2	GeneOntologyCellularComponent	GO:0015934	large ribosomal subunit	1.10831e-28	26	69	RPL11, RPL10, RPL17, RPL19, MRPL13, RPL5, RPL13A, MRPL52, RPL35, RPL36, RPLP1, MRPS24, RPL31, RPL37, RPL38, RPL39, RPL41, RPL21, RPL23A, RPL22, RPL24, RPL26, RPL27A, RPL30, RPL29, MRPL41
2	GeneOntologyCellularComponent	GO:0022625	cytosolic large ribosomal subunit	1.05099e-25	20	39	RPL11, RPL10, RPL19, RPL5, RPL35, RPL36, RPLP1, RPL31, RPL37, RPL38, RPL39, RPL41, RPL21, RPL23A, RPL22, RPL24, RPL26, RPL27A, RPL30, RPL29
2	Drug	C099555	CD 437	4.08749e-23	34	195	ATP6V0C, ATP5J, ATP5O, SNRPG, SOD1, C14orf156, RPL11, RPL10, RPL13, RPL19, SHFM1, RPL13A, COX7A2, TIMM8B, RPL35, FTH1, NACA, NDUFB9, UBA52, TXN, RPS10, RPLP1, LGALS1, RPL36AL, TMSB10, RPL39, RPL36A, EIF5A, RPL24, RPS27, RPS15, TOMM7, RPS16, RPS17
2	GeneOntologyCellularComponent	GO:0044455	mitochondrial membrane part	2.24279e-17	23	128	ATP5E, ATP5I, ATP5J, ATP5O, NDUFS7, COX7A2, UQCRB, TIMM8B, SURF1, ATPIF1, ATP5J2, NDUFA1, NDUFA5, NDUFA7, COX6A1, NDUFAB1, NDUFB5, NDUFB4, NDUFB9, NDUFC1, NDUFB10, NDUFV3, TOMM7
2	Drug	C028904	isoproturon	9.61805e-17	17	54	RPL23, RPL10, RPL13, RPL19, RPL13A, RPS6, RPS8, RPS7, RPS13, RPL38, RPL22, RPL24, RPS25, RPS20, RPS19, RPS18, RPS17
2	GeneOntologyCellularComponent	GO:0070469	respiratory chain	9.90638e-15	17	77	NDUFS7, NDUFA12, COX7A2, UQCRB, SURF1, NDUFA1, NDUFA5, NDUFA7, COX6A1, NDUFAB1, NDUFB5, NDUFB4, NDUFB9, NDUFC1, NDUFB10, NDUFV3, NDUFB11
2	Pathway	163200	Electron Transport Chain	5.79844e-14	17	65	NDUFS7, NDUFA12, UQCRB, NDUFA1, NDUFA5, NDUFA7, COX6A1, NDUFAB1, NDUFB5, NDUFB4, NDUFB9, COX5B, NDUFC1, NDUFB10, COX4I1, NDUFV3, NDUFB11
2	Pathway	hsa00190	Oxidative phosphorylation	7.25006e-14	23	139	ATP5E, ATP6V0C, ATP5I, ATP5J, ATP5O, NDUFS7, COX7A2, UQCRB, ATP5J2, NDUFA1, NDUFA5, NDUFA7, COX6A1, NDUFAB1, NDUFB5, NDUFB4, NDUFB9, COX5B, NDUFC1, NDUFB10, COX4I1, COX17, NDUFV3
2	GeneOntologyCellularComponent	GO:0005746	mitochondrial respiratory chain	1.4742e-13	15	64	NDUFS7, COX7A2, UQCRB, SURF1, NDUFA1, NDUFA5, NDUFA7, COX6A1, NDUFAB1, NDUFB5, NDUFB4, NDUFB9, NDUFC1, NDUFB10, NDUFV3
2	GeneOntologyBiologicalProcess	GO:0006119	oxidative phosphorylation	1.9009e-12	17	103	ATP5E, ATP6V0C, ATP5I, ATP5J, ATP5O, NDUFS7, UQCRB, NDUFA1, NDUFA5, NDUFA7, NDUFAB1, NDUFB5, NDUFB4, NDUFB9, NDUFC1, NDUFB10, NDUFV3
2	GeneOntologyBiologicalProcess	GO:0042274	ribosomal small subunit biogenesis	3.26396e-12	8	12	RPS6, RPS7, RPS24, RPS28, RPS15, RPS19, RPS16, RPS17
2	GeneOntologyMolecularFunction	GO:0008137	NADH dehydrogenase (ubiquinone) activity	5.91864e-12	12	45	NDUFS7, NDUFA12, NDUFA1, NDUFA5, NDUFA7, NDUFAB1, NDUFB5, NDUFB4, NDUFB9, NDUFC1, NDUFB10, NDUFV3
2	Drug	D018684	Glycine Agents	2.49153e-11	13	55	RPL23, RPL13, RPL19, RPL13A, PTGDS, RPL35, RPS6, RPS8, RPL37A, RPL24, RPL27, RPS25, RPS20
2	Interaction	120075	Affinity Capture-MS	4.84365e-11	9	20	RPS11, RPL31, RPL37, RPL23A, RPL26, RPL29, SRP14, RPS29, RPS16
2	Pathway	PW:0000034	oxidative phosphorylation	1.11609e-10	13	52	ATP6V0C, ATP5J, UQCRB, NDUFA5, NDUFA7, NDUFAB1, NDUFB5, NDUFB4, NDUFB9, COX5B, NDUFB10, COX4I1, COX17
2	GeneOntologyBiologicalProcess	GO:0022904	respiratory electron transport chain	1.43994e-10	13	69	NDUFS7, UQCRB, ALDH5A1, NDUFA1, NDUFA5, NDUFA7, NDUFAB1, NDUFB5, NDUFB4, NDUFB9, NDUFC1, NDUFB10, NDUFV3
2	Pathway	hsa05012	Parkinson's disease	2.61321e-10	19	136	ATP5E, ATP5J, ATP5O, NDUFS7, COX7A2, UQCRB, NDUFA1, NDUFA5, NDUFA7, COX6A1, NDUFAB1, NDUFB5, NDUFB4, NDUFB9, COX5B, NDUFC1, NDUFB10, COX4I1, NDUFV3
2	GeneOntologyBiologicalProcess	GO:0022900	electron transport chain	2.72695e-10	16	121	NDUFS7, NDUFA12, UQCRB, ALDH5A1, NDUFA1, NDUFA5, NDUFA7, NDUFAB1, NDUFB5, NDUFB4, NDUFB9, NDUFC1, NDUFB10, NDUFV3, TXN, NDUFB11
2	Interaction	114513	Affinity Capture-Western; Reconstituted Complex; Two-hybrid	1.90695e-09	8	20	RPL31, RPL35A, RPL37A, RPL36A, RPL21, RPL23A, RPL26, RPL29
2	Drug	CID000002021	spectinomycin	2.00672e-09	11	50	RPL11, RPL19, ATPIF1, RPS7, RPS12, RPS10, RPL22, RPL24, RPL29, RPS15A, RPS17
2	GeneOntologyBiologicalProcess	GO:0006364	rRNA processing	8.73081e-09	13	95	RPL11, RPL5, NOP10, RPS6, RPS7, RPL35A, RPL26, RPS24, RPS28, RPS15, RPS19, RPS16, RPS17
2	GeneOntologyMolecularFunction	GO:0015078	hydrogen ion transmembrane transporter activity	9.22194e-09	13	99	ATP5E, ATP6V0C, ATP5I, ATP5J, ATP5O, COX7A2, UQCRB, SURF1, ATP5J2, COX6A1, COX5B, COX4I1, C1orf31
2	Drug	DB00157	NADH	1.62767e-08	16	144	HSD17B7, NDUFS7, NDUFA12, ALDH5A1, NDUFA1, NDUFA5, NDUFA7, NDUFAB1, NDUFB5, NDUFB4, NDUFB9, NDUFC1, NDUFB10, NDUFV3, LDHB, IDH3B
2	Pathway	OXIDATIVE_PHOSPHORYLATION	OXIDATIVE_PHOSPHORYLATION	1.69048e-08	12	63	ATP5E, ATP6V0C, ATP5O, COX7A2, UQCRB, NDUFA1, NDUFA5, COX6A1, NDUFB5, NDUFB4, COX5B, COX4I1
2	Drug	D010882	Piperonyl Butoxide	3.76363e-08	15	133	FAM162A, RPL23, RPS27L, RPL10, RPL13, RPL17, RPL15, SEPW1, MT1A, ATF2, RPS7, NUPR1, RPS24, RPS15A, RPS19
2	Interaction	120319	Affinity Capture-MS	4.05359e-08	7	19	TXN, RPS10, RPL31, RPL23A, RPS28, RPS19, RPS16
2	GeneOntologyCellularComponent	GO:0045259	proton-transporting ATP synthase complex	7.34278e-08	7	23	ATP5E, ATP6V0C, ATP5I, ATP5J, ATP5O, ATPIF1, ATP5J2
2	Pathway	AERESPDON-PWY	aerobic respiration -- electron donors reaction list	1.18292e-07	9	37	NDUFS7, NDUFA1, NDUFA5, NDUFA7, NDUFB5, NDUFB4, NDUFB9, NDUFC1, NDUFB10
2	GeneOntologyBiologicalProcess	GO:0022613	ribonucleoprotein complex biogenesis	1.82216e-07	19	266	SNRPG, RPL11, RPL5, EIF4H, NOP10, RPS6, EIF3F, RPS7, RPL35A, EIF5A, RPL24, RPL26, EIF1, RPS24, RPS28, RPS15, RPS19, RPS16, RPS17
2	GeneOntologyBiologicalProcess	GO:0042273	ribosomal large subunit biogenesis	6.2131e-07	5	11	RPL11, RPL5, RPL35A, RPL24, RPL26
2	GeneOntologyCellularComponent	GO:0005753	mitochondrial proton-transporting ATP synthase complex	9.95525e-07	6	21	ATP5E, ATP5I, ATP5J, ATP5O, ATPIF1, ATP5J2
2	Drug	C032036	bromobenzene	1.04272e-06	12	108	CFL1, RPL15, RPL35, FTH1, LDHB, RPS8, RPS11, TMSB10, EIF5A, RPL22, NUPR1, RPS26
2	Drug	CID000000928	reduced nicotinamide adenine dinucleotide	1.32159e-06	17	222	HSD17B7, NDUFS7, SOD1, AKR1A1, NDUFA12, ALDH5A1, NDUFA1, NDUFA7, NDUFAB1, NDUFB5, NDUFB9, NDUFC1, NDUFB10, NDUFV3, LDHB, IDH3B, NDUFB11
2	GeneOntologyCellularComponent	GO:0005761	mitochondrial ribosome	5.03078e-06	8	57	MRPL13, MRPL52, MRPL30, MRPS18A, MRPS24, MRPL41, MRPS15, MRPL40
2	GeneOntologyCellularComponent	GO:0045263	proton-transporting ATP synthase complex, coupling factor F(o)	5.10517e-06	5	16	ATP6V0C, ATP5I, ATP5J, ATP5O, ATP5J2
2	GeneOntologyMolecularFunction	GO:0016675	oxidoreductase activity, acting on heme group of donors	5.42581e-06	6	28	COX7A2, SURF1, COX6A1, COX5B, COX4I1, C1orf31
2	Pathway	MAP00190_Oxidative_phosphorylation	MAP00190 Oxidative phosphorylation	6.4757e-06	8	44	ATP5E, ATP6V0C, COX7A2, UQCRB, NDUFA5, COX6A1, COX5B, COX4I1
2	GeneOntologyMolecularFunction	GO:0019843	rRNA binding	6.74675e-06	6	29	RPL11, RPL5, RPS11, RPL37, RPL23A, RPS18
2	Interaction	113387	Affinity Capture-MS	6.9567e-06	5	15	RPL31, RPL35A, RPL23A, RPS19, RPS16
2	Interaction	HPRD:03597	Karyopherin beta 3	9.95874e-06	5	16	RPL23, RPL13, RPL5, RPS7, RPL23A
2	Drug	C005948	astaxanthine	3.34466e-05	6	33	SOD1, UQCRB, NDUFA1, NDUFA5, COX5B, NME2
2	Drug	CID000004689	paromomycin	3.99664e-05	6	34	RPS12, RPL39, RPL41, RPL29, RPS23, RPS18
2	GeneFamily	MRPL	Mitochondrial ribosomal protein L genes	5.87412e-05	5	50	MRPL13, MRPL52, MRPL30, MRPL41, MRPL40
2	GeneOntologyCellularComponent	GO:0031980	mitochondrial lumen	0.000214949	13	237	ATP5E, CLPP, SOD1, MRPL13, MRPL52, MRPL30, MRPS18A, NDUFAB1, IDH3B, MRPS24, MRPL41, MRPS15, MRPL40
2	GeneOntologyCellularComponent	GO:0000276	mitochondrial proton-transporting ATP synthase complex, coupling factor F(o)	0.00053201	3	10	ATP5I, ATP5J, ATP5O
2	GeneOntologyCellularComponent	GO:0005762	mitochondrial large ribosomal subunit	0.000558519	4	23	MRPL13, MRPL52, MRPS24, MRPL41
2	GeneFamily	LYRM	LYR motif containing genes	0.00145746	2	7	NDUFB9, LYRM4
3	GeneOntologyCellularComponent	GO:0044456	synapse part	1.82557e-06	16	270	RICS, KCNMA1, KCND2, NLGN1, GRIP1, NRXN1, SLC1A2, MAP1B, SYT1, DNM3, ERC2, GABRA4, GRM3, GRM7, GRIA1, GRID2
3	Drug	DB00228	Enflurane	4.9794e-06	4	8	KCNMA1, KCNA1, ATP2C1, GRIA1
3	Interaction	HPRD:01938	Acetyl-CoA carboxylase alpha	9.53108e-06	4	8	PRKAA2, ATXN1, CSNK2A1, CSNK2A2
3	GeneOntologyCellularComponent	GO:0014069	postsynaptic density	1.28099e-05	8	76	RICS, KCND2, NLGN1, MAP1B, DNM3, GRM3, GRIA1, GRID2
3	Interaction	HPRD:04898	eIF-2B epsilon	1.68922e-05	4	9	GSK3B, CSNK2A1, CSNK2A2, CSNK1A1
3	GeneOntologyCellularComponent	GO:0042734	presynaptic membrane	2.06607e-05	6	40	NRXN1, SLC1A2, SYT1, ERC2, GRM3, GRM7
3	GeneFamily	KCN	Potassium channels	2.28043e-05	6	88	KCNMA1, KCND2, KCNB1, KCNH1, KCNA1, KCNQ5
3	Interaction	HPRD:06781	GluR delta 2	2.77211e-05	4	10	MAGI2, PTPN4, GRIA1, GRID2
3	GeneOntologyCellularComponent	GO:0070695	FHF complex	2.83723e-05	3	5	FAM160A2, HOOK3, HOOK1
3	Interaction	HPRD:01896	Solute carrier family 18 (vesicular monoamine), member 2	2.94982e-05	3	4	CSNK2A1, CSNK2A2, CSNK1A1
3	Interaction	HPRD:01243	Heterogeneous nuclear ribonucleoprotein C	3.4004e-05	5	20	KPNA3, SFRS12, CSNK2A1, CSNK2A2, CSNK1A1
3	GeneOntologyCellularComponent	GO:0030424	axon	4.26932e-05	11	174	KCNMA1, DCC, SLC1A2, KLHL24, ALCAM, MAP1B, SLC38A1, MBP, NCAM1, GRM3, GRM7
3	Interaction	HPRD:03478	Protein phosphatase inhibitor 2	4.28929e-05	4	11	LMTK2, GSK3B, CSNK2A1, CSNK2A2
3	Interaction	115904	Biochemical Activity	4.28929e-05	4	11	SMARCC1, CREBBP, CSNK2A1, CSNK2A2
3	Interaction	HPRD:00444	cAMP response element modulator	4.39218e-05	5	21	CREBBP, GSK3B, CSNK2A1, CSNK2A2, CSNK1A1
3	GeneFamily	CENT	Centaurins	9.75644e-05	3	14	ASAP1, AGAP1, ARAP2
3	GeneOntologyCellularComponent	GO:0070822	Sin3-type complex	0.000228399	3	9	RBBP4, HDAC2, CSNK2A1
3	GeneOntologyCellularComponent	GO:0045211	postsynaptic membrane	0.000243875	9	145	RICS, KCNMA1, NLGN1, GRIP1, GABRA4, GRM3, GRM7, GRIA1, GRID2
3	GeneOntologyCellularComponent	GO:0016604	nuclear body	0.00026189	10	179	DDX3X, MLL5, SF3B1, SRRM2, RBM25, CREBBP, PSPC1, MEF2C, CPSF6, SFRS18
3	GeneOntologyCellularComponent	GO:0030425	dendrite	0.000299227	10	182	RICS, KCND2, PEX5L, SLC1A2, MAP1B, CACNA1A, DNM3, GRM3, GRM7, GSK3B
3	GeneOntologyCellularComponent	GO:0000118	histone deacetylase complex	0.000356319	5	43	NRIP1, RBBP4, HDAC2, TBL1X, CSNK2A1
3	GeneOntologyCellularComponent	GO:0043197	dendritic spine	0.000356319	5	43	RICS, KCND2, SLC1A2, DNM3, GRM3
3	GeneOntologyCellularComponent	GO:0043025	cell soma	0.000457331	10	192	AGFG1, KCND2, KLHL24, ALCAM, MAP1B, MBP, CACNA1A, NCAM1, RTN4, GSK3B
4	GeneOntologyCellularComponent	GO:0005681	spliceosomal complex	6.03425e-07	10	138	DDX5, RHEB, STRAP, EFTUD2, HNRNPK, HNRNPH1, HNRNPF, HNRNPR, DHX15, SRRM2
4	GeneOntologyBiologicalProcess	GO:0008380	RNA splicing	4.5952e-06	13	297	NPM1, DDX5, DDX1, STRAP, EFTUD2, SFRS14, HNRNPK, HNRNPH1, HNRNPF, HNRNPR, THOC7, DHX15, SRRM2
4	GeneOntologyCellularComponent	GO:0030530	heterogeneous nuclear ribonucleoprotein complex	1.51263e-05	4	17	HNRNPK, HNRNPH1, HNRNPF, HNRNPR
5	Pathway	hsa05016	Huntington's disease	1.40541e-10	15	188	UQCR, ATP5F1, POLR2L, POLR2H, NDUFA4, NDUFA6, NDUFB4, COX5B, NDUFB7, NDUFC1, NDUFS3, NDUFS6, AP2S1, CLTA, CLTB
5	Pathway	hsa00190	Oxidative phosphorylation	3.83618e-10	13	139	UQCR, ATP5F1, NDUFA4, NDUFA6, NDUFB4, COX5B, NDUFB7, NDUFA11, NDUFC1, NDUFS3, NDUFS6, ATP6V0D1, ATP4B
5	Pathway	PW:0000034	oxidative phosphorylation	9.36876e-10	9	52	ATP5F1, NDUFA6, NDUFB4, COX5B, NDUFB7, NDUFS3, NDUFS6, ATP6V0D1, ATP4B
5	GeneOntologyCellularComponent	GO:0044455	mitochondrial membrane part	2.13261e-08	11	128	IMMT, TIMM13, ATP5F1, NDUFA4, NDUFA6, NDUFB4, NDUFB7, NDUFC1, NDUFS3, NDUFS6, FIS1
5	Pathway	AERESPDON-PWY	aerobic respiration -- electron donors reaction list	4.05274e-08	7	37	NDUFA4, NDUFB4, NDUFB7, NDUFA11, NDUFC1, NDUFS3, NDUFS6
5	GeneOntologyBiologicalProcess	GO:0006119	oxidative phosphorylation	5.75431e-08	10	103	UQCR, ATP5F1, NDUFA4, NDUFA6, NDUFB4, NDUFB7, NDUFC1, NDUFS3, NDUFS6, ATP6V0D1
5	GeneOntologyBiologicalProcess	GO:0042775	mitochondrial ATP synthesis coupled electron transport	8.0434e-08	8	58	UQCR, NDUFA4, NDUFA6, NDUFB4, NDUFB7, NDUFC1, NDUFS3, NDUFS6
5	GeneOntologyCellularComponent	GO:0005747	mitochondrial respiratory chain complex I	1.01655e-07	7	43	NDUFA4, NDUFA6, NDUFB4, NDUFB7, NDUFC1, NDUFS3, NDUFS6
5	GeneOntologyMolecularFunction	GO:0016651	oxidoreductase activity, acting on NADH or NADPH	1.24822e-06	8	86	NDUFA4, NDUFA6, NDUFB4, TXNDC17, NDUFB7, NDUFC1, NDUFS3, NDUFS6
5	Pathway	OXIDATIVE_PHOSPHORYLATION	OXIDATIVE_PHOSPHORYLATION	1.79346e-06	7	63	NDUFA4, NDUFB4, COX5B, NDUFB7, NDUFA11, ATP6V0D1, ATP4B
5	GeneOntologyBiologicalProcess	GO:0031396	regulation of protein ubiquitination	4.41003e-06	5	26	RNF139, UBE2D1, FKBP1A, NDFIP2, STUB1
5	GeneOntologyBiologicalProcess	GO:0031398	positive regulation of protein ubiquitination	7.79162e-06	4	14	UBE2D1, FKBP1A, NDFIP2, STUB1
5	Pathway	UBIQUINONE_BIOSYNTHESIS	UBIQUINONE_BIOSYNTHESIS	9.20248e-06	4	15	NDUFA4, NDUFB4, NDUFB7, NDUFA11
5	GeneOntologyCellularComponent	GO:0031980	mitochondrial lumen	9.9592e-06	11	237	ATP5F1, ACO2, CLPP, POLDIP2, MRPL43, MRPS12, MRPS26, TST, MRPS16, MRPL17, C1QBP
5	GeneOntologyCellularComponent	GO:0033279	ribosomal subunit	2.41642e-05	8	131	FAU, MRPL43, RPS8, MRPS12, MRPS26, RPL32, MRPS16, MRPL17
5	GeneFamily	RAMP	Receptor (G protein-coupled) activity modifying proteins	4.07352e-05	2	3	RAMP1, RAMP2
5	GeneOntologyCellularComponent	GO:0030132	clathrin coat of coated pit	8.16692e-05	3	10	AP2S1, CLTA, CLTB
5	GeneOntologyCellularComponent	GO:0005761	mitochondrial ribosome	0.000158114	5	57	MRPL43, MRPS12, MRPS26, MRPS16, MRPL17
5	GeneOntologyMolecularFunction	GO:0008565	protein transporter activity	0.000171847	6	89	NDUFA11, RAB4A, RAMP1, RAMP2, AP2S1, NUTF2
5	GeneOntologyCellularComponent	GO:0015935	small ribosomal subunit	0.000273752	5	64	FAU, RPS8, MRPS12, MRPS26, MRPS16
5	GeneOntologyCellularComponent	GO:0016591	DNA-directed RNA polymerase II, holoenzyme	0.000602123	6	115	POLR2L, POLR2H, MED13L, EDF1, TAF10, MED9
5	GeneOntologyCellularComponent	GO:0005905	coated pit	0.000644918	4	44	RAMP2, AP2S1, CLTA, CLTB
6	Pathway	163200	Electron Transport Chain	8.75547e-12	12	65	COX6C, UQCRB, UQCRC2, CYCS, NDUFA5, NDUFB3, NDUFB6, NDUFC2, NDUFA13, NDUFA12, COX5A, NDUFB11
6	Drug	C005948	astaxanthine	2.67677e-10	8	33	COX6C, UQCRB, UQCRC2, SOD1, NDUFA5, NDUFC2, COX5A, PRDX1
6	GeneOntologyBiologicalProcess	GO:0006119	oxidative phosphorylation	1.12453e-08	10	103	UQCRB, ATP5F1, UQCRC2, ATP6V1C1, NDUFA5, ATP6V1F, NDUFB3, NDUFB6, NDUFC2, ATP6V1D
6	Pathway	MAP00190_Oxidative_phosphorylation	MAP00190 Oxidative phosphorylation	3.5723e-08	8	44	COX6C, UQCRB, UQCRC2, ATP6V1C1, NDUFA5, ATP6V1F, ATP6V1D, COX5A
6	GeneOntologyMolecularFunction	GO:0003735	structural constituent of ribosome	5.17567e-08	11	160	RPL14, MRPL33, RPS6, RPS3A, RPL7, RPL9, RPL18, MRPL13, MRPS18C, MRPS33, RPS18
6	Pathway	hsa00190	Oxidative phosphorylation	7.12922e-08	12	139	COX6C, UQCRB, ATP5F1, UQCRC2, ATP6V1C1, NDUFA5, ATP6V1F, NDUFB3, NDUFB6, NDUFC2, ATP6V1D, COX5A
6	Pathway	72766	Translation	1.18576e-07	11	118	RPL14, RPS6, EIF3I, RPS3A, RPL7, RPL9, RPL18, EIF4A1, EIF3E, EIF2S1, RPS18
6	GeneOntologyBiologicalProcess	GO:0006414	translational elongation	2.56283e-07	9	109	RPL14, RPS6, RPS3A, RPL7, RPL9, RPL18, SRP14, SRP9, RPS18
6	Pathway	74160	Gene Expression	4.95168e-07	15	269	RPL14, POLR2F, SNRPA1, TAF13, RPS6, EIF3I, RPS3A, RPL7, RPL9, RPL18, CCNH, EIF4A1, EIF3E, EIF2S1, RPS18
6	GeneOntologyCellularComponent	GO:0005746	mitochondrial respiratory chain	5.83654e-07	7	64	UQCRB, UQCRC2, NDUFA5, NDUFB3, NDUFB6, NDUFC2, NDUFA13
6	Pathway	OXIDATIVE_PHOSPHORYLATION	OXIDATIVE_PHOSPHORYLATION	6.49883e-07	8	63	COX6C, UQCRB, ATP6V1C1, NDUFA5, ATP6V1F, NDUFB6, ATP6V1D, COX5A
6	GeneOntologyMolecularFunction	GO:0050136	NADH dehydrogenase (quinone) activity	1.31514e-06	6	45	NDUFA5, NDUFB3, NDUFB6, NDUFC2, NDUFA13, NDUFA12
6	Pathway	hsa05016	Huntington's disease	1.89955e-06	12	188	COX6C, UQCRB, ATP5F1, UQCRC2, CYCS, POLR2F, SOD1, NDUFA5, NDUFB3, NDUFB6, NDUFC2, COX5A
6	GeneOntologyCellularComponent	GO:0022626	cytosolic ribosome	2.93179e-06	7	81	RPL14, RPS6, RPS3A, RPL7, RPL9, RPL18, RPS18
6	GeneOntologyBiologicalProcess	GO:0006800	oxygen and reactive oxygen species metabolic process	3.31307e-06	7	78	ROMO1, CYCS, SOD1, NDUFA13, PRDX1, PARK7, CRYAB
6	GeneOntologyCellularComponent	GO:0044445	cytosolic part	3.45363e-06	9	157	VBP1, RPL14, RPS6, RPS3A, RPL7, RPL9, RPL18, CCT6A, RPS18
6	GeneOntologyCellularComponent	GO:0044455	mitochondrial membrane part	6.50526e-06	8	128	UQCRB, ATP5F1, UQCRC2, NDUFA5, NDUFB3, NDUFB6, NDUFC2, NDUFA13
6	GeneOntologyMolecularFunction	GO:0015078	hydrogen ion transmembrane transporter activity	1.27035e-05	7	99	COX6C, UQCRB, ATP5F1, ATP6V1C1, ATP6V1F, ATP6V1D, COX5A
6	GeneOntologyCellularComponent	GO:0005759	mitochondrial matrix	1.48722e-05	10	237	ATP5F1, CYCS, PMPCB, SOD1, MDH2, YARS2, MRPL13, MRPS18C, MRPS33, PIN4
6	GeneOntologyCellularComponent	GO:0005747	mitochondrial respiratory chain complex I	1.89616e-05	5	43	NDUFA5, NDUFB3, NDUFB6, NDUFC2, NDUFA13
6	GeneFamily	IPO	Importins	2.03226e-05	3	18	KPNA3, KPNA1, IPO5
6	Pathway	hsa03010	Ribosome	2.5264e-05	8	102	RPL14, RPS6, RPS3A, RPL7, RPL9, RPL18, MRPL13, RPS18
6	GeneOntologyMolecularFunction	GO:0051920	peroxiredoxin activity	2.56918e-05	3	8	PRDX1, PARK7, SEP15
6	Pathway	PW:0000034	oxidative phosphorylation	3.09631e-05	6	52	COX6C, UQCRB, ATP5F1, NDUFA5, NDUFB3, NDUFB6
6	GeneOntologyMolecularFunction	GO:0016209	antioxidant activity	3.97811e-05	5	49	SELS, SOD1, PRDX1, PARK7, SEP15
6	GeneOntologyCellularComponent	GO:0015935	small ribosomal subunit	0.000132012	5	64	RPS6, RPS3A, MRPS18C, MRPS33, RPS18
6	GeneOntologyCellularComponent	GO:0015934	large ribosomal subunit	0.000188709	5	69	RPL14, RPL7, RPL9, RPL18, MRPL13
6	GeneOntologyCellularComponent	GO:0022625	cytosolic large ribosomal subunit	0.000222981	4	39	RPL14, RPL7, RPL9, RPL18
6	GeneOntologyMolecularFunction	GO:0008379	thioredoxin peroxidase activity	0.000362963	2	4	PRDX1, SEP15
6	GeneOntologyCellularComponent	GO:0033178	proton-transporting two-sector ATPase complex, catalytic domain	0.000393552	3	19	ATP6V1C1, ATP6V1F, ATP6V1D
6	GeneOntologyCellularComponent	GO:0005839	proteasome core complex	0.000460407	3	20	PSMB4, PSMA6, PSMA1
6	GeneOntologyCellularComponent	GO:0016469	proton-transporting two-sector ATPase complex	0.000461125	4	47	ATP5F1, ATP6V1C1, ATP6V1F, ATP6V1D
6	GeneOntologyCellularComponent	GO:0000785	chromatin	0.000634285	8	246	CBX1, HMGN3, H3F3A, H2AFZ, ID2, HMGN1, EIF3E, HIST1H2BC
6	GeneOntologyMolecularFunction	GO:0005048	signal sequence binding	0.000651954	3	22	KPNA3, KPNA1, SRP14
6	GeneOntologyCellularComponent	GO:0005844	polysome	0.000703293	3	23	PSMA1, RPS6, EIF2S1
6	GeneOntologyCellularComponent	GO:0001740	Barr body	0.000862752	2	6	H3F3A, H2AFZ
6	GeneOntologyCellularComponent	GO:0048500	signal recognition particle	0.00120177	2	7	SRP14, SRP9
7	Interaction	HPRD:09066	TIF2	2.22381e-07	6	45	KIF5A, KIF5C, CREBBP, HIF1A, SMARCE1, NR3C1
8	Interaction	HPRD:01258	ATP synthase, H+ transporting, mitochondrial F1 complex, alpha subunit 1, cardiac muscle	1.51534e-05	3	8	YWHAG, YWHAZ, ATP5A1
8	Interaction	HPRD:03184	14-3-3 Beta	1.64163e-05	7	124	YWHAG, RABGEF1, DYRK1A, FAM82A2, RNPS1, ATP5A1, EPB41L3
8	Interaction	HPRD:10458	Rho guanine nucleotide exchange factor 2	2.26225e-05	3	9	YWHAG, YWHAZ, ARHGEF2
8	Interaction	HPRD:02409	PCTAIRE protein kinase 1	3.2165e-05	3	10	YWHAG, YWHAZ, CDK5R1
8	Interaction	HPRD:05457	14-3-3 epsilon	8.22693e-05	5	68	YWHAG, YWHAZ, ARHGEF2, DYRK1A, MAP3K5
8	Interaction	HPRD:04097	Arginine/serine-rich splicing factor 10	9.57348e-05	3	14	YWHAG, YWHAZ, RNPS1
8	Interaction	HPRD:10068	MAP3K2	9.57348e-05	3	14	YWHAG, YWHAZ, MAP3K5
8	Interaction	HPRD:05818	Kinesin family member 1B	9.57348e-05	3	14	YWHAG, KIF1B, CPEB1
8	Interaction	112328	Reconstituted Complex	0.000128955	2	3	SFRS1, DYRK1A
8	Interaction	HPRD:07687	Family with sequence similarity 82, member C	0.000128955	2	3	YWHAG, FAM82A2
8	Interaction	107353	Affinity Capture-Western	0.000128955	2	3	CANX, AMFR
8	Interaction	116904	Affinity Capture-MS	0.000128955	2	3	YWHAG, YWHAZ
8	Interaction	HPRD:04401	Pinin	0.000145896	3	16	YWHAG, RNPS1, SFRS18
8	Interaction	HPRD:03183	14-3-3 zeta	0.000154598	6	123	YWHAZ, ARHGEF2, PRKCI, MAP3K5, ATP5A1, EPB41L3
9	Pathway	G_PROTEIN_SIGNALING	G_PROTEIN_SIGNALING	4.3296e-06	7	95	AKAP6, AKAP11, GNAI2, ITPR1, PRKCI, AKAP9, PRKACB
9	Pathway	PW:0000543	protein kinase A (PKA) signaling	1.88265e-05	5	47	AKAP6, AKAP11, PDE2A, AKAP9, PRKACB
9	GeneFamily	AKAP	A kinase (PRKA) anchor protein family	2.54273e-05	3	16	AKAP6, AKAP11, AKAP9
10	Domain	PS50014	BROMODOMAIN_2	1.79196e-05	4	34	BRD3, ZMYND8, BRD2, SMARCA4
10	GeneFamily	AKAP	A kinase (PRKA) anchor protein family	0.000419565	2	16	AKAP9, AKAP2
10	GeneFamily	KCN	Potassium channels	0.000581531	3	88	KCNQ1, KCNC1, KCNA2
10	GeneFamily	KIF	Kinesins	0.00252645	2	39	KIF5B, KIF5C
11	GeneOntologyBiologicalProcess	GO:0043161	proteasomal ubiquitin-dependent protein catabolic process	7.19354e-05	6	111	PSMC2, PSMD11, PSMD12, PSMA7, TAF9, PSMA2
11	GeneFamily	ARF	ADP-ribosylation factors	0.000135161	2	5	ARF6, ARF3
12	GeneOntologyBiologicalProcess	GO:0006414	translational elongation	3.17567e-22	17	109	RPS6, RPS5, RPL23, RPS7, RPL10A, RPS4X, RPS3, RPL6, RPL7A, RPL8, RPL12, RPL18, RPL18A, RPLP0, RPL3, RPSA, RPS15
12	GeneOntologyCellularComponent	GO:0022626	cytosolic ribosome	9.25253e-21	15	81	RPS6, RPS5, RPL23, RPS7, RPS4X, RPS3, RPL6, RPL7A, RPL8, RPL18, RPL18A, RPLP0, RPL3, RPSA, RPS15
12	GeneOntologyCellularComponent	GO:0044445	cytosolic part	2.80918e-19	17	157	RPS6, RPS5, RPL23, RPS7, RPS4X, RPS3, RPL6, RPL7A, RPL8, RPL18, RPL18A, RPLP0, PFDN5, RPL3, RPSA, PFDN4, RPS15
12	GeneOntologyCellularComponent	GO:0033279	ribosomal subunit	4.83061e-19	16	131	RPS6, RPS5, RPS7, RPS4X, RPS3, RPL6, RPL7A, RPL8, RPL18, RPL18A, RPLP0, RPL3, RPSA, MRPL27, MRPL22, RPS15
12	Pathway	hsa00190	Oxidative phosphorylation	6.04096e-17	17	139	COX7A2, COX6C, ATP5G2, ATP5G3, PPA1, ATP5I, COX7A2L, ATP5L, SDHB, NDUFA3, NDUFA8, ATP5C1, NDUFB5, COX6B1, NDUFB8, NDUFB7, NDUFV1
12	GeneOntologyCellularComponent	GO:0044455	mitochondrial membrane part	4.55014e-16	14	128	COX7A2, ATP5G2, ATP5G3, ATP5I, COX7A2L, ATP5L, NDUFA3, NDUFA8, ATP5C1, NDUFB5, TIMM23, NDUFB8, NDUFB7, NDUFV1
12	Pathway	hsa05012	Parkinson's disease	1.09047e-15	16	136	COX7A2, COX6C, ATP5G2, ATP5G3, PARK7, SLC25A5, COX7A2L, SDHB, NDUFA3, NDUFA8, ATP5C1, NDUFB5, COX6B1, NDUFB8, NDUFB7, NDUFV1
12	Pathway	PW:0000034	oxidative phosphorylation	6.25139e-14	11	52	COX6C, ATP5G2, ATP5G3, COX7A2L, SDHB, NDUFA3, NDUFA8, ATP5C1, NDUFB5, NDUFB8, NDUFB7
12	GeneOntologyBiologicalProcess	GO:0006119	oxidative phosphorylation	8.89873e-13	11	103	ATP5G2, ATP5G3, ATP5I, ATP5L, NDUFA3, NDUFA8, ATP5C1, NDUFB5, NDUFB8, NDUFB7, NDUFV1
12	Drug	D016604	Aflatoxin B1	4.40803e-12	12	147	RPL23, RPS7, RPL10A, RPS4X, RPS3, RPL6, RPL7A, RPL8, RPSA, GSTA4, APEX1, PSMB3
12	GeneOntologyCellularComponent	GO:0015934	large ribosomal subunit	2.10208e-11	9	69	RPL6, RPL7A, RPL8, RPL18, RPL18A, RPLP0, RPL3, MRPL27, MRPL22
12	Pathway	163200	Electron Transport Chain	2.81071e-11	10	65	COX6C, COX7A2L, SDHB, NDUFA3, NDUFA8, NDUFB5, COX6B1, NDUFB8, NDUFB7, NDUFV1
12	GeneOntologyCellularComponent	GO:0022627	cytosolic small ribosomal subunit	3.15945e-10	7	38	RPS6, RPS5, RPS7, RPS4X, RPS3, RPSA, RPS15
12	GeneOntologyCellularComponent	GO:0022625	cytosolic large ribosomal subunit	3.83682e-10	7	39	RPL6, RPL7A, RPL8, RPL18, RPL18A, RPLP0, RPL3
12	GeneOntologyCellularComponent	GO:0005746	mitochondrial respiratory chain	4.13637e-10	8	64	COX7A2, COX7A2L, NDUFA3, NDUFA8, NDUFB5, NDUFB8, NDUFB7, NDUFV1
12	GeneOntologyMolecularFunction	GO:0015078	hydrogen ion transmembrane transporter activity	5.50212e-10	9	99	COX7A2, COX6C, ATP5G2, ATP5G3, ATP5I, COX7A2L, ATP5L, ATP5C1, COX6B1
12	Pathway	OXIDATIVE_PHOSPHORYLATION	OXIDATIVE_PHOSPHORYLATION	5.99381e-10	9	63	COX7A2, COX6C, PPA1, SDHB, NDUFA8, NDUFB5, COX6B1, NDUFB7, NDUFV1
12	Drug	CID000005102	rotenone	1.50861e-09	10	144	COX7A2, COX6C, PARK7, SLC25A5, SDHB, NDUFA3, NDUFA8, COX6B1, TIMM23, NDUFV1
12	Drug	C099555	CD 437	1.96249e-09	11	195	COX7A2, COX6C, ATP5G3, RPL8, SLC25A5, COX7A2L, NACA, ATP5L, SNRPD2, ATP5C1, RPS15
12	Drug	D018684	Glycine Agents	7.17654e-09	7	55	RPS6, RPS5, RPL23, RPL6, RPL12, RPL18A, RPSA
12	Pathway	AERESPDON-PWY	aerobic respiration -- electron donors reaction list	7.23707e-09	7	37	SDHB, NDUFA3, NDUFA8, NDUFB5, NDUFB8, NDUFB7, NDUFV1
12	GeneOntologyCellularComponent	GO:0005753	mitochondrial proton-transporting ATP synthase complex	3.09209e-08	5	21	ATP5G2, ATP5G3, ATP5I, ATP5L, ATP5C1
12	GeneOntologyBiologicalProcess	GO:0006120	mitochondrial electron transport, NADH to ubiquinone	3.42283e-08	6	43	NDUFA3, NDUFA8, NDUFB5, NDUFB8, NDUFB7, NDUFV1
12	GeneFamily	RPS	Ribosomal proteins	1.18048e-07	6	108	RPS6, RPS5, RPS7, RPS4X, RPS3, RPS15
12	GeneOntologyBiologicalProcess	GO:0022613	ribonucleoprotein complex biogenesis	2.70546e-07	10	266	RPS6, EIF3I, RPS5, RPS7, RPS3, RPL7A, RPLP0, SNRPD2, EIF1, RPS15
12	Interaction	HPRD:03422	Staufen	4.07055e-07	5	29	RPS6, PPP1CA, RPL6, RPL7A, RPLP0
12	GeneOntologyCellularComponent	GO:0045263	proton-transporting ATP synthase complex, coupling factor F(o)	6.59043e-07	4	16	ATP5G2, ATP5G3, ATP5I, ATP5L
12	Pathway	UBIQUINONE_BIOSYNTHESIS	UBIQUINONE_BIOSYNTHESIS	3.48481e-06	4	15	NDUFA8, NDUFB5, NDUFB7, NDUFV1
12	Drug	DB00157	NADH	5.54853e-06	7	144	IDH3B, NDUFA3, NDUFA8, NDUFB5, NDUFB8, NDUFB7, NDUFV1
12	Drug	C028904	isoproturon	5.7335e-06	5	54	RPS6, RPL23, RPS7, RPL6, RPL18A
12	GeneOntologyMolecularFunction	GO:0016676	oxidoreductase activity, acting on heme group of donors, oxygen as acceptor	7.02015e-06	4	28	COX7A2, COX6C, COX7A2L, COX6B1
12	Drug	CID000000928	reduced nicotinamide adenine dinucleotide	1.04796e-05	8	222	IDH3B, SDHB, NDUFA3, NDUFA8, NDUFB5, NDUFB8, NDUFB7, NDUFV1
12	Drug	CID000010294	mersalyl	1.05094e-05	5	61	PPA1, SLC25A5, NDUFA3, NDUFA8, NDUFV1
12	GeneOntologyBiologicalProcess	GO:0042274	ribosomal small subunit biogenesis	1.82972e-05	3	12	RPS6, RPS7, RPS15
12	GeneOntologyBiologicalProcess	GO:0022618	ribonucleoprotein complex assembly	5.3189e-05	6	149	EIF3I, RPS5, RPS3, SNRPD2, EIF1, RPS15
12	Domain	PS00605	ATPASE_C	7.82356e-05	2	3	ATP5G2, ATP5G3
12	Pathway	PW:0000035	ATP synthetic	8.11041e-05	3	12	ATP5G2, ATP5G3, ATP5C1
12	GeneOntologyCellularComponent	GO:0005844	polysome	0.000144976	3	23	RPS6, RPS4X, RPL7A
12	Domain	IPR003177	COX7a	0.00015595	2	4	COX7A2, COX7A2L
12	Drug	CID000009321	hydrazine	0.000179637	4	59	COX7A2, COX6C, NDUFB5, COX6B1
12	Drug	CID000025959	ferricyanide	0.000213167	5	114	COX7A2, COX6C, PFDN4, SDHB, COX6B1
12	GeneFamily	MRPL	Mitochondrial ribosomal protein L genes	0.000220234	3	50	MRPL27, MRPL22, MRPL53
12	GeneOntologyBiologicalProcess	GO:0042254	ribosome biogenesis	0.000297046	5	131	RPS6, RPS7, RPL7A, RPLP0, RPS15
12	GeneOntologyBiologicalProcess	GO:0006413	translational initiation	0.000387574	4	77	EIF3I, RPS5, RPS3, EIF1
12	GeneOntologyMolecularFunction	GO:0051920	peroxiredoxin activity	0.000545862	2	8	PRDX1, PARK7
12	GeneOntologyBiologicalProcess	GO:0006417	regulation of translation	0.000605275	5	153	EIF3I, RPS5, PPP1CA, RPS4X, EIF1
12	GeneOntologyMolecularFunction	GO:0003906	DNA-(apurinic or apyrimidinic site) lyase activity	0.000699785	2	9	RPS3, APEX1
12	GeneOntologyCellularComponent	GO:0000276	mitochondrial proton-transporting ATP synthase complex, coupling factor F(o)	0.00087698	2	10	ATP5I, ATP5L
12	GeneOntologyCellularComponent	GO:0016272	prefoldin complex	0.00087698	2	10	PFDN5, PFDN4
14	GeneFamily	ZMYND	Zinc fingers, MYND-type	0.000730234	2	21	ZMYND11, RUNX1T1
15	GeneFamily	FBX	F-box genes	0.00103412	2	38	FBXO33, FBXO25
16	Interaction	HPRD:04979	Glutamate receptor, metabotropic 7	7.40546e-08	4	13	CALM2, TUBA4A, TUBA1B, TUBA1A
16	GeneFamily	TUB	Tubulins	1.06767e-06	3	30	TUBA4A, TUBA1B, TUBA1A
16	Interaction	HPRD:11875	Peptidyl-prolyl isomerase D	2.86762e-06	3	9	APP, HSP90AA1, SLC25A4
16	Interaction	111238	Two-hybrid	2.86762e-06	3	9	EEF1A1, ACTG1, PFN2
16	Interaction	HPRD:01818	c-Myc	3.01709e-06	5	69	TUBA4A, TUBA1B, UBB, HSP90AA1, TUBA1A
16	Interaction	HPRD:05837	Humanin	7.45892e-06	3	12	EEF1A1, APP, HSP90AA1
16	GeneOntologyBiologicalProcess	GO:0050803	regulation of synapse structure and activity	1.66407e-05	3	24	APP, UBB, SNAP25
16	Domain	IPR003388	Reticulon	1.96577e-05	2	4	RTN3, RTN4
16	Interaction	HPRD:02228	Histone deacetylase 6	2.2792e-05	3	17	TUBA4A, TUBA1B, UBB
16	Interaction	HPRD:06919	SPARC like protein 1	3.28062e-05	2	3	PRNP, SPARCL1
16	Pathway	hsa05131	Pathogenic Escherichia coli infection - EPEC	4.19376e-05	4	55	ACTG1, TUBA4A, TUBA1B, TUBA1A
16	Drug	CID000005372	tacrolimus	4.22936e-05	6	270	ACTG1, CALM2, PPIA, PPP3CA, NDFIP1, HSP90AA1
16	Interaction	HPRD:07259	Reticulon 4	4.41715e-05	3	21	TUBA4A, RTN3, RTN4
16	GeneOntologyMolecularFunction	GO:0003924	GTPase activity	7.8474e-05	5	219	EEF1A1, TUBA4A, TUBA1B, ARF1, TUBA1A
16	Interaction	111522	Affinity Capture-Western	0.000108894	2	5	PPIA, PPP3CA
16	GeneFamily	ARF	ADP-ribosylation factors	0.00409433	1	5	ARF1
17	Pathway	PW:0000015	Alzheimer disease	5.06173e-05	3	24	GNG5, UBE2D2, SNCA
17	Pathway	PW:0000294	altered ubiquitin/proteasome degradation	9.1571e-05	2	5	UBE2D2, SNCA
18	Pathway	CDC42RACPATHWAY	CDC42RACPATHWAY	1.50131e-05	3	15	ARPC4, RHOA, RAC1
18	Drug	C057862	cyanoginosin LR	3.43936e-05	5	147	PFN1, GSR, DECR2, GNB1, UGP2
18	Interaction	125438	Biochemical Activity; Reconstituted Complex	3.48543e-05	2	3	RHOA, RAC1
18	Interaction	HPRD:12479	Rho specific guanine nucleotide exchange factor p114	3.48543e-05	2	3	RHOA, GNB1
18	Pathway	h_edg1Pathway	Phospholipids as signalling intermediaries	5.74032e-05	3	23	RHOA, GNB1, RAC1
18	Pathway	P00016	Cytoskeletal regulation by Rho GTPase	5.93094e-05	4	65	PFN1, ARPC4, RHOA, RAC1
18	Interaction	HPRD:06876	Formin like	0.000115676	2	5	PFN1, RAC1
18	Pathway	RHOPATHWAY	RHOPATHWAY	0.000143123	3	31	PFN1, ARPC4, RHOA
18	Interaction	HPRD:12050	Nuclear transport factor 2	0.000173138	2	6	NUTF2, PTMA
18	Interaction	120905	Two-hybrid	0.000237801	4	89	ID2, PFN1, HMGB1, ATP1B1
18	Interaction	HPRD:00956	Interferon gamma receptor 2	0.000241867	2	7	IFNGR2, DNAJA3
18	Interaction	HPRD:11822	Histone 2 H3c	0.000241867	2	7	RBBP4, PTMA
18	Interaction	HPRD:12116	Guanine nucleotide binding protein, gamma 13	0.00041283	2	9	LIN7B, GNB1
18	Interaction	HPRD:00127	Interferon gamma receptor 1	0.000514917	2	10	IFNGR2, RAC1
18	GeneFamily	PSM	Proteasome (prosome, macropain) subunit genes	0.00134653	2	59	PSMD9, PSMB2
19	GeneOntologyCellularComponent	GO:0070469	respiratory chain	3.48385e-12	8	77	NDUFS7, UCRC, NDUFA7, hCG_25371, UQCRFS1, NDUFS4, COX7A2L, NDUFV2
19	GeneOntologyBiologicalProcess	GO:0006119	oxidative phosphorylation	3.09827e-11	8	103	NDUFS7, UCRC, NDUFA7, ATP5G1, hCG_25371, NDUFS4, NDUFV2, ATP5O
19	GeneOntologyBiologicalProcess	GO:0022904	respiratory electron transport chain	8.93239e-11	7	69	NDUFS7, UCRC, SOD2, NDUFA7, hCG_25371, NDUFS4, NDUFV2
19	GeneOntologyBiologicalProcess	GO:0022900	electron transport chain	1.14306e-10	8	121	NDUFS7, UCRC, SOD2, NDUFA7, hCG_25371, UQCRFS1, NDUFS4, NDUFV2
19	GeneOntologyCellularComponent	GO:0044455	mitochondrial membrane part	2.19513e-10	8	128	NDUFS7, NDUFA7, ATP5G1, UQCRFS1, NDUFS4, COX7A2L, NDUFV2, ATP5O
19	Pathway	163200	Electron Transport Chain	8.8078e-10	7	65	NDUFS7, UCRC, NDUFA7, UQCRFS1, NDUFS4, COX7A2L, NDUFV2
19	GeneOntologyBiologicalProcess	GO:0042773	ATP synthesis coupled electron transport	1.98427e-09	6	58	NDUFS7, UCRC, NDUFA7, hCG_25371, NDUFS4, NDUFV2
19	GeneOntologyCellularComponent	GO:0005746	mitochondrial respiratory chain	4.12909e-09	6	64	NDUFS7, NDUFA7, UQCRFS1, NDUFS4, COX7A2L, NDUFV2
19	GeneOntologyMolecularFunction	GO:0015078	hydrogen ion transmembrane transporter activity	3.75706e-08	6	99	UCRC, ATP5G1, hCG_25371, UQCRFS1, COX7A2L, ATP5O
19	GeneOntologyMolecularFunction	GO:0016681	oxidoreductase activity, acting on diphenols and related substances as donors, cytochrome as acceptor	5.99503e-07	3	9	UCRC, hCG_25371, UQCRFS1
19	Drug	CID000000928	reduced nicotinamide adenine dinucleotide	7.1929e-07	7	222	NDUFS7, LDHB, SOD2, NDUFA7, NDUFS4, NDUFV2, PVALB
19	GeneOntologyMolecularFunction	GO:0008137	NADH dehydrogenase (ubiquinone) activity	1.82925e-06	4	45	NDUFS7, NDUFA7, NDUFS4, NDUFV2
19	Drug	CID000447920	ubiquinols	5.99271e-06	4	51	NDUFS7, UQCRFS1, NDUFS4, NDUFV2
19	Drug	CID000000283	formate	2.06249e-05	5	144	LDHB, SOD2, DTD1, ESD, PSMB4
19	Drug	DB00157	NADH	2.06249e-05	5	144	NDUFS7, LDHB, NDUFA7, NDUFS4, NDUFV2
19	Drug	CID000004055	menadione	4.3243e-05	5	168	LDHB, GLRX5, SOD2, CBR1, UQCRFS1
19	Drug	CID000001156	coenzyme Q10	5.99463e-05	4	91	NDUFS7, SOD2, UQCRFS1, NDUFS4
19	GeneOntologyBiologicalProcess	GO:0006122	mitochondrial electron transport, ubiquinol to cytochrome c	8.9557e-05	2	7	UCRC, hCG_25371
19	Pathway	hsa04260	Cardiac muscle contraction	0.000130912	4	83	UCRC, hCG_25371, UQCRFS1, COX7A2L
19	GeneOntologyMolecularFunction	GO:0051540	metal cluster binding	0.000157517	3	53	NDUFS7, UQCRFS1, NDUFV2
19	GeneOntologyBiologicalProcess	GO:0010257	NADH dehydrogenase complex assembly	0.000191152	2	10	NDUFS7, NDUFS4
19	GeneFamily	PSM	Proteasome (prosome, macropain) subunit genes	0.000274399	2	59	PSMB10, PSMB4
19	GeneOntologyCellularComponent	GO:0045263	proton-transporting ATP synthase complex, coupling factor F(o)	0.000519333	2	16	ATP5G1, ATP5O
19	Pathway	PW:0000034	oxidative phosphorylation	0.000593892	3	52	NDUFA7, COX7A2L, NDUFV2
19	GeneOntologyMolecularFunction	GO:0051537	2 iron, 2 sulfur cluster binding	0.000644504	2	19	UQCRFS1, NDUFV2
19	GeneOntologyMolecularFunction	GO:0009055	electron carrier activity	0.000897993	4	219	GLRX5, UQCRFS1, COX7A2L, NDUFV2
20	GeneFamily	RGS	Regulator of G-protein signalling genes	0.000152107	2	20	RGS10, RGS4
20	GeneFamily	WDR	WD repeat domain genes	0.00486309	2	113	WDR48, WDR37
21	GeneFamily	CORO	Coronins	0.00114792	1	7	CORO7
22	Pathway	PW:0000559	hexosamine biosynthetic	9.11517e-05	2	7	OGT, MGEA5
23	GeneOntologyMolecularFunction	GO:0003735	structural constituent of ribosome	3.55519e-05	5	160	RPS13, MRPL23, MRPS17, RPL27, RPS16
23	GeneOntologyMolecularFunction	GO:0008137	NADH dehydrogenase (ubiquinone) activity	0.00016213	3	45	NDUFA7, NDUFB2, NDUFS8
23	GeneOntologyCellularComponent	GO:0044455	mitochondrial membrane part	0.000307971	4	128	NDUFA7, NDUFB2, TIMM10, NDUFS8
23	GeneOntologyCellularComponent	GO:0033279	ribosomal subunit	0.000336382	4	131	RPS13, MRPL23, MRPS17, RPS16
23	GeneOntologyCellularComponent	GO:0015935	small ribosomal subunit	0.000573334	3	64	RPS13, MRPS17, RPS16
23	GeneFamily	RPS	Ribosomal proteins	0.00182194	2	108	RPS13, RPS16
24	GeneFamily	WDR	WD repeat domain genes	0.00328173	2	113	FBXW11, WDR3
25	Domain	IPR011046	WD40_like	8.44246e-05	4	142	WDR45L, CDC42BPA, PAK1IP1, WDFY3
25	Domain	G3DSA:1.25.10.10	ARM-like	0.000161815	4	168	KPNA1, HUWE1, TRIP12, WDFY3
26	GeneOntologyCellularComponent	GO:0031225	anchored to membrane	4.43357e-05	5	226	GFRA2, RAB5B, DNAJC5, GPRIN1, SPRN
26	GeneFamily	DNAJ	DnaJ (Hsp40) homologs	0.000393789	2	39	DNAJC7, DNAJC5
27	Drug	C013813	4-anisidine	2.82741e-05	3	33	NAMPT, RRAS, NUS1
28	Interaction	HPRD:04409	BCL2 antagonist of cell death	2.72827e-05	3	35	YWHAQ, WASF1, YWHAZ
28	GeneOntologyMolecularFunction	GO:0005230	extracellular ligand-gated ion channel activity	0.000117818	3	74	GRIA2, GLRB, GABRA1
28	Interaction	HPRD:00774	Heat shock 70 KD protein 1A	0.000153159	3	62	YWHAQ, YWHAZ, HSPA8
28	Interaction	HPRD:01768	Thromboxane A2 receptor	0.000153828	2	11	GNAQ, YWHAZ
28	Interaction	117172	Affinity Capture-Western; Reconstituted Complex; Two-hybrid	0.000153828	2	11	PPP1CB, HSPA8
28	Interaction	HPRD:03948	Regulator of G protein signaling 7	0.000217712	2	13	GNAQ, YWHAQ
28	Interaction	111929	Affinity Capture-Western; Reconstituted Complex	0.000292477	2	15	GNAQ, HSPA8
28	Interaction	HPRD:07038	Ubiquitin C	0.000474383	2	19	YWHAZ, HSPA8
28	Interaction	HPRD:04058	MARK3	0.000638878	2	22	YWHAZ, ASB13
28	Interaction	HPRD:04336	ABL interactor 1	0.000638878	2	22	WASF1, HSPA8
28	Domain	IPR006202	Neur_chan_lig_bd	0.00108382	2	34	GLRB, GABRA1
29	GeneFamily	AKR	Aldo-Keto reductases	0.0042595	1	13	AKR1A1
30	GeneOntologyMolecularFunction	GO:0016655	oxidoreductase activity, acting on NADH or NADPH, quinone or similar compound as acceptor	3.31504e-05	3	51	GSTO1, NDUFA9, NDUFS4
32	Interaction	HPRD:17279	Veli3	7.8038e-05	2	5	ABCA1, LIN7C
32	Interaction	HPRD:02918	HIV 1 REV binding protein	0.000163302	2	7	AGFG1, XPO1
33	GeneOntologyBiologicalProcess	GO:0008045	motor axon guidance	2.24129e-06	3	15	SLIT2, KIF5C, MYCBP2
34	GeneFamily	ZZZ	Zinc fingers, ZZ-type	0.000983929	1	6	MIB2
35	Interaction	HPRD:15718	Zinc finger DHHC domain containing 3	2.17348e-05	2	5	EWSR1, GABRG2
36	GeneOntologyCellularComponent	GO:0019897	extrinsic to plasma membrane	4.29565e-06	4	67	NUMB, GNAS, RGS7, GNG12
36	Drug	CID000001613	zopolrestat	6.37023e-06	3	19	APPL1, MAPK8, PRKCB
36	Interaction	HPRD:03184	14-3-3 Beta	1.03985e-05	5	124	SLC4A7, YWHAE, RGS7, HSP90AB1, PIK3R4
36	GeneOntologyCellularComponent	GO:0005834	heterotrimeric G-protein complex	3.30275e-05	3	38	GNAS, RGS7, GNG12
36	GeneFamily	RGS	Regulator of G-protein signalling genes	0.00327976	1	20	RGS7
37	GeneFamily	CENT	Centaurins	0.00458677	1	14	AGAP3
38	Pathway	PW:0000049	cysteine metabolic	3.65527e-05	2	9	LDHB, CDO1
38	Pathway	PW:0000064	propanoate metabolic	7.90267e-05	2	13	LDHB, ECHS1
39	Interaction	128308	Affinity Capture-Western	1.88406e-05	2	5	YWHAQ, UBC
39	GeneOntologyMolecularFunction	GO:0047485	protein N-terminus binding	7.14496e-05	3	78	YWHAQ, MORF4L1, ZWINT
39	GeneFamily	SULT	Sulfotransferases (cytosolic)	0.00458677	1	14	SULT4A1
40	Pathway	hsa05016	Huntington's disease	0.000328576	4	188	POLR2C, NDUFA9, NDUFC2, NDUFV1
40	GeneFamily	CHMP	Chromatin modifying proteins	0.00360478	1	11	CHMP4B
41	Interaction	HPRD:00241	Calmodulin 1	0.000310877	3	114	ADD1, ADCYAP1R1, KCNQ2
42	MousePheno	MP:0006027	impaired respiratory alveologenesis	5.07903e-05	2	17	PDGFA, NR3C1
42	GeneOntologyCellularComponent	GO:0005876	spindle microtubule	0.000384376	2	31	TUBG2, NUSAP1
43	GeneFamily	ZBTB	Zinc fingers, C2H2 and BTB domain containing	0.00705149	1	43	ZBTB16
44	Interaction	111343	Co-crystal Structure	0.000146002	2	14	SERPINI1, CALR
48	Drug	CID000001021	porphobilinogen	2.32887e-06	3	31	CPOX, CS, ATP5A1
48	Pathway	GLYCOLYSIS/TCA/GLYOX-BYPASS	superpathway of glycolysis, pyruvate dehydrogenase, TCA, and glyoxylate bypass	1.88574e-05	3	34	GPI, CS, MDH1
48	Drug	CID000006755	Lawson	2.12286e-05	3	64	CLU, CHN1, ATP5A1
48	Drug	CID000000999	phenylacetic acid	3.42142e-05	3	75	CLU, CPOX, CS
48	Drug	CID000000280	CO2	6.9338e-05	4	272	GPI, CPOX, CS, MDH1
48	Drug	CID000066868	porphyrin	8.83465e-05	3	103	CPOX, CHN1, ATP5A1
48	Pathway	GLUCONEO-PWY	gluconeogenesis	0.000404573	2	19	GPI, MDH1
48	Pathway	RAC1PATHWAY	RAC1PATHWAY	0.000545055	2	22	CHN1, PAK1
50	GeneOntologyMolecularFunction	GO:0000049	tRNA binding	0.000117353	2	22	SSB, TRNT1
50	GeneOntologyMolecularFunction	GO:0019205	nucleobase, nucleoside, nucleotide kinase activity	0.000566891	2	48	CMPK2, DCK
50	GeneFamily	LARP	La ribonucleoprotein domain family	0.00196705	1	6	SSB
51	GeneFamily	PSM	Proteasome (prosome, macropain) subunit genes	0.00134653	2	59	PSMD3, PSMB5
52	GeneFamily	IPO	Importins	0.00589534	1	18	TNPO1
53	GeneFamily	CHMP	Chromatin modifying proteins	0.00540274	1	11	CHMP2A
53	GeneFamily	IPO	Importins	0.00883069	1	18	KPNA1
55	Interaction	HPRD:18210	RNA binding protein CELF3	3.25734e-05	2	6	SOBP, TLE1
55	Pathway	hsa00512	O-Glycan biosynthesis	0.000350835	2	31	OGT, GALNT2
56	Interaction	HPRD:12067	RP42	8.70278e-06	2	6	DCUN1D1, RNF11
56	Interaction	120937	Affinity Capture-MS; Affinity Capture-Western	1.21789e-05	2	7	DCUN1D1, CUL4A
56	Drug	D019772	Topotecan	3.19309e-05	4	223	QKI, CUL4A, ACSL3, HNRPDL
57	GeneOntologyMolecularFunction	GO:0051087	chaperone binding	0.000232779	2	23	HSPE1, TBCA
57	GeneFamily	UBE2	Ubiquitin-conjugating enzymes E2	0.00787143	1	48	UBE2E3
58	GeneFamily	MRPL	Mitochondrial ribosomal protein L genes	6.58965e-05	2	50	MRPL19, MRPL18
59	GeneFamily	RNF	RING-type zinc fingers	0.00342833	2	209	TTC3, RNF166
60	Domain	PS50003	PH_DOMAIN	2.49127e-05	4	192	KIF1A, DAB2IP, SPTBN2, IQSEC3
61	Drug	CID000004908	primaquine	2.22816e-05	3	49	CRYZ, DLD, SIRPA
